# Supplementary material for: Transposable Elements Are Major Contributors to the Origin, Diversification, and Regulation of Vertebrate Long Noncoding RNAs
Source: PLoS Genet. 2013 Apr 25;9(4):e1003470. doi: 10.1371/journal.pgen.1003470 (PMC3636048; doi:10.1371/journal.pgen.1003470)
Supplement: Table S8 — Details of TE content of human lincRNAs from Cabili et al. (2011). (XLSX) [file pgen.1003470.s013.xlsx]

## Sheet: TableS8
Transposable elements are major contributors to the content, diversification, and regulation of vertebrate long noncoding RNAs
Aurélie Kapusta, Zev Kronenberg, Vincent J. Lynch, Xiaoyu Zhuo, LeeAnn Ramsay, Guillaume Bourque, Mark Yandell & Cédric Feschotte
Supplementary Table 8: TE content of Cabili set lncRNAs
Repeat Masker ouput = hg19 assembly, RM v.330, repbase libraries 20120124, from RM website - corrected for simple fragmentation (see Methods)
1	2	3	4	5	6	7	8	9	10	11	12	13	14	15	16	17	18	19	20	21	22	23	24	25	26	27	28	29	30
From_Cabili-set	From_Cabili-set	From_Cabili-set	From_Cabili-set	From_Cabili-set	From_Cabili-set	From_Cabili-set	From_Cabili-set	.	.			From_Cabili-set	From_Cabili-set	From_Cabili-set	.	.
GeneID	GeneName	TranscriptID	TranscriptType	TrChr	TrStart	TrEnd	TrStrand	TrLength	TrMatureLen	ExonType	ExonNb	ExChr	ExStart	ExEnd	ExLen	TEoverlapLen	%thisTE-Exon	%thisTE-MatureTr	%ALL-TEs-in-matureTr	Nb_of_Transcripts	TE contribution	TEname	TEclass/fam	TEchr	TEstart	TEend	TEstrand	TE_avg_%div	Teage_2
XLOC_000001	linc-OR4F16-10	TCONS_00000119	lincRNA	chr1	160446	161525	+	1080	457	LAST	2	chr1	161314	161525	212	212	100	46.3895	46.3895	1	PolyA_SPL	L1MC5a	LINE/L1	chr1	161300	161705	+	25.71	Ancient
XLOC_000002	linc-OR4F16-9	TCONS_00000120	lincRNA	chr1	320162	321056	+	895	575	MIDDLE	2	chr1	320881	320938	58	58	100	10.087	45.7391	1	Both_SPL	MER1A	DNA/hAT-Charlie	chr1	320601	321020	+	12.59	LineageSpe
XLOC_000002	linc-OR4F16-9	TCONS_00000120	lincRNA	chr1	320162	321056	+	895	575	FIRST	1	chr1	320162	320653	492	72	14.6341	12.5217	45.7391	1	TSS	AluJo	SINE/Alu	chr1	319944	320233	-	16.42	LineageSpe
XLOC_000002	linc-OR4F16-9	TCONS_00000120	lincRNA	chr1	320162	321056	+	895	575	FIRST	1	chr1	320162	320653	492	53	10.7724	9.21739	45.7391	1	SPL	MER1A	DNA/hAT-Charlie	chr1	320601	321020	+	12.59	LineageSpe
XLOC_000002	linc-OR4F16-9	TCONS_00000120	lincRNA	chr1	320162	321056	+	895	575	FIRST	1	chr1	320162	320653	492	80	16.2602	13.913	45.7391	1	exonized	FLAM_A	SINE/Alu	chr1	320236	320315	-	18.67	LineageSpe
XLOC_000003	linc-SAMD11-9	TCONS_00000121	lincRNA	chr1	459656	461954	+	2299	676	LAST	3	chr1	461751	461954	204	21	10.2941	3.10651	23.0769	1	SPL	MER4D1	LTR/ERV1	chr1	461702	461771	+	12.71	LineageSpe
XLOC_000003	linc-SAMD11-9	TCONS_00000121	lincRNA	chr1	459656	461954	+	2299	676	MIDDLE	2	chr1	461154	461288	135	19	14.0741	2.81065	23.0769	1	SPL	MER4CL34	LTR/ERV1	chr1	461270	461556	-	17.12	LineageSpe
XLOC_000003	linc-SAMD11-9	TCONS_00000121	lincRNA	chr1	459656	461954	+	2299	676	MIDDLE	2	chr1	461154	461288	135	116	85.9259	17.1598	23.0769	1	SPL	MER4D1	LTR/ERV1	chr1	460478	461269	+	12.71	LineageSpe
XLOC_000004	linc-SAMD11-8	TCONS_00000122	lincRNA	chr1	523009	530148	+	7140	607	LAST	2	chr1	529615	530148	534	217	40.6367	35.7496	40.5272	4	exonized	L1ME4c	LINE/L1	chr1	529849	530065	-	27.93	Ancient
XLOC_000004	linc-SAMD11-8	TCONS_00000122	lincRNA	chr1	523009	530148	+	7140	607	LAST	2	chr1	529615	530148	534	29	5.43071	4.77759	40.5272	4	PolyA	Ricksha_0	DNA/MULE-MuDR	chr1	530120	530588	+	15.28	LineageSpe
XLOC_000004	linc-SAMD11-8	TCONS_00000123	lincRNA	chr1	523048	529954	+	6907	402	LAST	2	chr1	529615	529954	340	106	31.1765	26.3682	29.3532	4	PolyA	L1ME4c	LINE/L1	chr1	529849	530065	-	27.93	Ancient
XLOC_000004	linc-SAMD11-8	TCONS_00000123	lincRNA	chr1	523048	529954	+	6907	402	FIRST	1	chr1	523048	523109	62	12	19.3548	2.98507	29.3532	4	SPL	MIRb	SINE/MIR	chr1	523098	523185	+	29.76	Ancient
XLOC_000004	linc-SAMD11-8	TCONS_00000124	lincRNA	chr1	529833	530595	+	763	437	LAST	2	chr1	530463	530595	133	126	94.7368	28.833	82.3799	4	SPL	Ricksha_0	DNA/MULE-MuDR	chr1	530120	530588	+	15.28	LineageSpe
XLOC_000004	linc-SAMD11-8	TCONS_00000124	lincRNA	chr1	529833	530595	+	763	437	FIRST	1	chr1	529833	530136	304	17	5.59211	3.89016	82.3799	4	SPL	Ricksha_0	DNA/MULE-MuDR	chr1	530120	530588	+	15.28	LineageSpe
XLOC_000004	linc-SAMD11-8	TCONS_00000124	lincRNA	chr1	529833	530595	+	763	437	FIRST	1	chr1	529833	530136	304	217	71.3816	49.6568	82.3799	4	exonized	L1ME4c	LINE/L1	chr1	529849	530065	-	27.93	Ancient
XLOC_000004	linc-SAMD11-8	TCONS_00000125	lincRNA	chr1	529839	532878	+	3040	498	LAST	2	chr1	532679	532878	200	137	68.5	27.51	87.1486	4	PolyA	AluSx1	SINE/Alu	chr1	532742	533037	-	11.14	LineageSpe
XLOC_000004	linc-SAMD11-8	TCONS_00000125	lincRNA	chr1	529839	532878	+	3040	498	LAST	2	chr1	532679	532878	200	63	31.5	12.6506	87.1486	4	SPL	Charlie20a	DNA/hAT-Charlie	chr1	532640	532741	+	27.7	Ancient
XLOC_000004	linc-SAMD11-8	TCONS_00000125	lincRNA	chr1	529839	532878	+	3040	498	FIRST	1	chr1	529839	530136	298	17	5.7047	3.41365	87.1486	4	SPL	Ricksha_0	DNA/MULE-MuDR	chr1	530120	530588	+	15.28	LineageSpe
XLOC_000004	linc-SAMD11-8	TCONS_00000125	lincRNA	chr1	529839	532878	+	3040	498	FIRST	1	chr1	529839	530136	298	217	72.8188	43.5743	87.1486	4	exonized	L1ME4c	LINE/L1	chr1	529849	530065	-	27.93	Ancient
XLOC_000005	linc-SAMD11-7	TCONS_00000126	lincRNA	chr1	696291	697369	+	1079	456	LAST	2	chr1	697158	697369	212	212	100	46.4912	46.4912	1	PolyA_SPL	L1MC5a	LINE/L1	chr1	697144	697549	+	25.71	Ancient
XLOC_000007	linc-SAMD11-5	TCONS_00000129	lincRNA	chr1	752751	755214	+	2464	1944	LAST	2	chr1	754103	755214	1112	41	3.68705	2.10905	31.7387	1	exonized	L2c	LINE/L2	chr1	754990	755030	-	32.46	Ancient
XLOC_000007	linc-SAMD11-5	TCONS_00000129	lincRNA	chr1	752751	755214	+	2464	1944	LAST	2	chr1	754103	755214	1112	72	6.47482	3.7037	31.7387	1	SPL	MER102c	DNA/hAT-Charlie	chr1	754002	754174	+	28.32	Ancient
XLOC_000007	linc-SAMD11-5	TCONS_00000129	lincRNA	chr1	752751	755214	+	2464	1944	LAST	2	chr1	754103	755214	1112	104	9.35252	5.34979	31.7387	1	PolyA	MER44D	DNA/TcMar-Tigger	chr1	755111	755328	+	18.16	Ancient
XLOC_000007	linc-SAMD11-5	TCONS_00000129	lincRNA	chr1	752751	755214	+	2464	1944	LAST	2	chr1	754103	755214	1112	238	21.4029	12.2428	31.7387	1	exonized	MLT1I	LTR/ERVL-MaLR	chr1	754446	754683	+	29.11	Ancient
XLOC_000007	linc-SAMD11-5	TCONS_00000129	lincRNA	chr1	752751	755214	+	2464	1944	FIRST	1	chr1	752751	753582	832	162	19.4712	8.33333	31.7387	1	exonized	MER58A	DNA/hAT-Charlie	chr1	753420	753581	-	22.89	Ancient
XLOC_000010	linc-SAMD11-2	TCONS_00000796	lincRNA	chr1	840487	841186	+	700	578	FIRST	1	chr1	840487	841059	573	196	34.2059	33.91	53.1142	1	exonized	L1MB5	LINE/L1	chr1	840646	840841	+	19.6	Ancient
XLOC_000010	linc-SAMD11-2	TCONS_00000796	lincRNA	chr1	840487	841186	+	700	578	FIRST	1	chr1	840487	841059	573	111	19.3717	19.2042	53.1142	1	SPL	L1MB5	LINE/L1	chr1	840949	841179	+	19.6	Ancient
XLOC_000011	linc-SAMD11-1	TCONS_00000032	lincRNA	chr1	846815	850328	+	3514	3043	LAST	2	chr1	847325	850328	3004	53	1.76431	1.7417	29.1817	2	SPL	MIRb	SINE/MIR	chr1	847232	847377	-	29.76	Ancient
XLOC_000011	linc-SAMD11-1	TCONS_00000032	lincRNA	chr1	846815	850328	+	3514	3043	LAST	2	chr1	847325	850328	3004	81	2.6964	2.66185	29.1817	2	exonized	MIRb	SINE/MIR	chr1	847700	847780	+	29.76	Ancient
XLOC_000011	linc-SAMD11-1	TCONS_00000032	lincRNA	chr1	846815	850328	+	3514	3043	LAST	2	chr1	847325	850328	3004	74	2.46338	2.43181	29.1817	2	exonized	L2b	LINE/L2	chr1	848222	848295	+	32.38	Ancient
XLOC_000011	linc-SAMD11-1	TCONS_00000032	lincRNA	chr1	846815	850328	+	3514	3043	LAST	2	chr1	847325	850328	3004	283	9.42077	9.30003	29.1817	2	PolyA	AluSp	SINE/Alu	chr1	850046	850357	+	9.53	LineageSpe
XLOC_000011	linc-SAMD11-1	TCONS_00000032	lincRNA	chr1	846815	850328	+	3514	3043	LAST	2	chr1	847325	850328	3004	187	6.22503	6.14525	29.1817	2	exonized	L2b	LINE/L2	chr1	847843	848029	-	32.38	Ancient
XLOC_000011	linc-SAMD11-1	TCONS_00000032	lincRNA	chr1	846815	850328	+	3514	3043	LAST	2	chr1	847325	850328	3004	210	6.99068	6.90108	29.1817	2	exonized	L1MEc	LINE/L1	chr1	849836	850045	+	25.01	Ancient
XLOC_000011	linc-SAMD11-1	TCONS_00000134	lincRNA	chr1	849551	850351	+	801	443	LAST	2	chr1	850183	850351	169	169	100	38.149	38.149	2	PolyA_SPL	AluSp	SINE/Alu	chr1	850046	850357	+	9.53	LineageSpe
XLOC_000015	linc-SCNN1D-1	TCONS_00000135	lincRNA	chr1	1210603	1215800	+	5198	268	LAST	3	chr1	1215691	1215800	110	110	100	41.0448	49.6269	3	PolyA_SPL	AluYf4	SINE/Alu	chr1	1215563	1215862	+	4.32	LineageSpe
XLOC_000015	linc-SCNN1D-1	TCONS_00000135	lincRNA	chr1	1210603	1215800	+	5198	268	MIDDLE	2	chr1	1214448	1214528	81	23	28.3951	8.58209	49.6269	3	SPL	MER4B-int	LTR/ERV1	chr1	1214173	1214470	-	15.93	Ancient
XLOC_000015	linc-SCNN1D-1	TCONS_00000136	lincRNA	chr1	1210617	1214773	+	4157	389	LAST	2	chr1	1214448	1214773	326	23	7.05521	5.9126	57.3265	3	SPL	MER4B-int	LTR/ERV1	chr1	1214173	1214470	-	15.93	Ancient
XLOC_000015	linc-SCNN1D-1	TCONS_00000136	lincRNA	chr1	1210617	1214773	+	4157	389	LAST	2	chr1	1214448	1214773	326	200	61.3497	51.4139	57.3265	3	PolyA	MER4B-int	LTR/ERV1	chr1	1214574	1214780	-	15.93	Ancient
XLOC_000015	linc-SCNN1D-1	TCONS_00000799	lincRNA	chr1	1210339	1214764	+	4426	558	LAST	3	chr1	1214711	1214764	54	54	100	9.67742	20.4301	3	PolyA_SPL	MER4B-int	LTR/ERV1	chr1	1214574	1214780	-	15.93	Ancient
XLOC_000015	linc-SCNN1D-1	TCONS_00000799	lincRNA	chr1	1210339	1214764	+	4426	558	MIDDLE	2	chr1	1214448	1214610	163	37	22.6994	6.63082	20.4301	3	SPL	MER4B-int	LTR/ERV1	chr1	1214574	1214780	-	15.93	Ancient
XLOC_000015	linc-SCNN1D-1	TCONS_00000799	lincRNA	chr1	1210339	1214764	+	4426	558	MIDDLE	2	chr1	1214448	1214610	163	23	14.1104	4.12186	20.4301	3	SPL	MER4B-int	LTR/ERV1	chr1	1214173	1214470	-	15.93	Ancient
XLOC_000017	linc-TMEM88B-1	TCONS_00000801	lincRNA	chr1	1317609	1318166	+	558	481	FIRST	1	chr1	1317609	1317691	83	60	72.2892	12.474	12.474	2	TSS	MER66C	LTR/ERV1	chr1	1317470	1317668	+	16.12	Ancient
XLOC_000017	linc-TMEM88B-1	TCONS_00000802	lincRNA	chr1	1317653	1318166	+	514	246	FIRST	1	chr1	1317653	1317691	39	16	41.0256	6.50407	6.50407	2	TSS	MER66C	LTR/ERV1	chr1	1317470	1317668	+	16.12	Ancient
XLOC_000019	linc-MIB2-1	TCONS_00000033	lincRNA	chr1	1535819	1543166	+	7348	1048	LAST	3	chr1	1542997	1543166	170	22	12.9412	2.09924	16.0305	5	SPL	AluSx1	SINE/Alu	chr1	1542717	1543018	-	11.14	LineageSpe
XLOC_000019	linc-MIB2-1	TCONS_00000033	lincRNA	chr1	1535819	1543166	+	7348	1048	MIDDLE	2	chr1	1542253	1542862	610	146	23.9344	13.9313	16.0305	5	SPL	AluSx1	SINE/Alu	chr1	1542717	1543018	-	11.14	LineageSpe
XLOC_000019	linc-MIB2-1	TCONS_00000137	lincRNA	chr1	1535819	1545864	+	10046	2219	MIDDLE	2	chr1	1542253	1542862	610	146	23.9344	6.57954	52.8166	5	SPL	AluSx1	SINE/Alu	chr1	1542717	1543018	-	11.14	LineageSpe
XLOC_000019	linc-MIB2-1	TCONS_00000137	lincRNA	chr1	1535819	1545864	+	10046	2219	LAST	4	chr1	1544694	1545864	1171	87	7.42955	3.92068	52.8166	5	exonized	MER65D	LTR/ERV1	chr1	1545475	1545561	+	22.01	Ancient
XLOC_000019	linc-MIB2-1	TCONS_00000137	lincRNA	chr1	1535819	1545864	+	10046	2219	LAST	4	chr1	1544694	1545864	1171	84	7.17336	3.78549	52.8166	5	exonized	MER65D	LTR/ERV1	chr1	1545346	1545429	+	22.01	Ancient
XLOC_000019	linc-MIB2-1	TCONS_00000137	lincRNA	chr1	1535819	1545864	+	10046	2219	LAST	4	chr1	1544694	1545864	1171	317	27.0709	14.2857	52.8166	5	exonized	AluSq	SINE/Alu	chr1	1544913	1545229	+	10.52	LineageSpe
XLOC_000019	linc-MIB2-1	TCONS_00000137	lincRNA	chr1	1535819	1545864	+	10046	2219	MIDDLE	3	chr1	1542997	1543166	170	22	12.9412	0.991438	52.8166	5	SPL	AluSx1	SINE/Alu	chr1	1542717	1543018	-	11.14	LineageSpe
XLOC_000019	linc-MIB2-1	TCONS_00000137	lincRNA	chr1	1535819	1545864	+	10046	2219	LAST	4	chr1	1544694	1545864	1171	303	25.8753	13.6548	52.8166	5	PolyA	THE1C	LTR/ERVL-MaLR	chr1	1545562	1545913	+	12.21	LineageSpe
XLOC_000019	linc-MIB2-1	TCONS_00000137	lincRNA	chr1	1535819	1545864	+	10046	2219	LAST	4	chr1	1544694	1545864	1171	213	18.1896	9.59892	52.8166	5	SPL	AluSz	SINE/Alu	chr1	1544606	1544906	+	12.11	LineageSpe
XLOC_000019	linc-MIB2-1	TCONS_00000804	lincRNA	chr1	1535653	1538401	+	2749	1369	LAST	2	chr1	1537467	1538401	935	149	15.9358	10.8839	10.8839	5	exonized	MER113	DNA/hAT-Charlie	chr1	1538083	1538231	-	25.16	Ancient
XLOC_000019	linc-MIB2-1	TCONS_00000805	lincRNA	chr1	1540734	1542821	+	2088	578	LAST	2	chr1	1542253	1542821	569	105	18.4534	18.1661	18.1661	5	PolyA	AluSx1	SINE/Alu	chr1	1542717	1543018	-	11.14	LineageSpe
XLOC_000022	linc-TNFRSF14-1	TCONS_00000807	lincRNA	chr1	2482415	2486841	+	4427	4212	LAST	2	chr1	2483442	2486841	3400	41	1.20588	0.973409	14.3637	2	SPL	L1MEc	LINE/L1	chr1	2483343	2483482	-	25.01	Ancient
XLOC_000022	linc-TNFRSF14-1	TCONS_00000807	lincRNA	chr1	2482415	2486841	+	4427	4212	LAST	2	chr1	2483442	2486841	3400	117	3.44118	2.77778	14.3637	2	exonized	L2b	LINE/L2	chr1	2485885	2486001	-	32.38	Ancient
XLOC_000022	linc-TNFRSF14-1	TCONS_00000807	lincRNA	chr1	2482415	2486841	+	4427	4212	LAST	2	chr1	2483442	2486841	3400	58	1.70588	1.37702	14.3637	2	exonized	MIR	SINE/MIR	chr1	2484244	2484301	+	27.84	Ancient
XLOC_000022	linc-TNFRSF14-1	TCONS_00000807	lincRNA	chr1	2482415	2486841	+	4427	4212	FIRST	1	chr1	2482415	2483226	812	389	47.9064	9.23552	14.3637	2	TSS	L1ME2	LINE/L1	chr1	2482339	2482803	-	24.92	Ancient
XLOC_000022	linc-TNFRSF14-1	TCONS_00001917	lincRNA	chr1	2482706	2483281	+	576	480	FIRST	1	chr1	2482706	2482729	24	24	100	5	5	2	TSS_SPL	L1ME2	LINE/L1	chr1	2482339	2482803	-	24.92	Ancient
XLOC_000026	linc-ACTRT2-2	TCONS_00001923	lincRNA	chr1	2693739	2695364	+	1626	875	LAST	2	chr1	2694757	2695364	608	90	14.8026	10.2857	10.2857	1	PolyA	L1MB3	LINE/L1	chr1	2695275	2695859	-	17.82	Ancient
XLOC_000027	linc-ACTRT2-1	TCONS_00000815	lincRNA	chr1	2730632	2734321	+	3690	641	FIRST	1	chr1	2730632	2731016	385	385	100	60.0624	60.0624	2	TSS_SPL	LTR12C	LTR/ERV1	chr1	2729664	2731052	+	8.77	LineageSpe
XLOC_000027	linc-ACTRT2-1	TCONS_00001924	lincRNA	chr1	2730632	2734321	+	3690	686	FIRST	1	chr1	2730632	2731016	385	385	100	56.1224	56.1224	2	TSS_SPL	LTR12C	LTR/ERV1	chr1	2729664	2731052	+	8.77	LineageSpe
XLOC_000031	linc-AJAP1-5	TCONS_00000822	lincRNA	chr1	4036189	4069751	+	33563	314	LAST	3	chr1	4069726	4069751	26	26	100	8.28025	100	2	PolyA_SPL	L4_B_Mam	LINE/RTE-X	chr1	4069386	4069925	+	31.27	Ancient
XLOC_000031	linc-AJAP1-5	TCONS_00000822	lincRNA	chr1	4036189	4069751	+	33563	314	MIDDLE	2	chr1	4036942	4037162	221	221	100	70.3822	100	2	Both_SPL	L2a	LINE/L2	chr1	4036543	4037599	-	29.37	Ancient
XLOC_000031	linc-AJAP1-5	TCONS_00000822	lincRNA	chr1	4036189	4069751	+	33563	314	FIRST	1	chr1	4036189	4036255	67	67	100	21.3376	100	2	TSS_SPL	THE1D	LTR/ERVL-MaLR	chr1	4036005	4036367	+	13.27	LineageSpe
XLOC_000031	linc-AJAP1-5	TCONS_00001926	lincRNA	chr1	4037028	4058260	+	21233	406	LAST	3	chr1	4058116	4058260	145	28	19.3103	6.89655	99.2611	2	SPL	AluJo	SINE/Alu	chr1	4057847	4058143	-	16.42	LineageSpe
XLOC_000031	linc-AJAP1-5	TCONS_00001926	lincRNA	chr1	4037028	4058260	+	21233	406	LAST	3	chr1	4058116	4058260	145	114	78.6207	28.0788	99.2611	2	PolyA	Kanga1b	DNA/TcMar-Tc2	chr1	4058147	4058864	+	24.9	Ancient
XLOC_000031	linc-AJAP1-5	TCONS_00001926	lincRNA	chr1	4037028	4058260	+	21233	406	MIDDLE	2	chr1	4056867	4056992	126	126	100	31.0345	99.2611	2	Both_SPL	MLT1C	LTR/ERVL-MaLR	chr1	4056627	4057042	-	21.68	Ancient
XLOC_000031	linc-AJAP1-5	TCONS_00001926	lincRNA	chr1	4037028	4058260	+	21233	406	FIRST	1	chr1	4037028	4037162	135	135	100	33.2512	99.2611	2	TSS_SPL	L2a	LINE/L2	chr1	4036543	4037599	-	29.37	Ancient
XLOC_000033	linc-AJAP1-3	TCONS_00000003	lincRNA	chr1	4472111	4484744	+	12634	2074	LAST	6	chr1	4484054	4484744	691	52	7.52533	2.50723	62.4397	4	SPL	MER31B	LTR/ERV1	chr1	4483899	4484105	+	19.8	Ancient
XLOC_000033	linc-AJAP1-3	TCONS_00000003	lincRNA	chr1	4472111	4484744	+	12634	2074	MIDDLE	4	chr1	4482820	4483247	428	160	37.3832	7.71456	62.4397	4	SPL	LTR16A1	LTR/ERVL	chr1	4483088	4483477	+	26.34	Ancient
XLOC_000033	linc-AJAP1-3	TCONS_00000003	lincRNA	chr1	4472111	4484744	+	12634	2074	FIRST	1	chr1	4472111	4472692	582	100	17.1821	4.8216	62.4397	4	SPL	L1ME3G	LINE/L1	chr1	4472593	4473403	-	27.94	Ancient
XLOC_000033	linc-AJAP1-3	TCONS_00000003	lincRNA	chr1	4472111	4484744	+	12634	2074	LAST	6	chr1	4484054	4484744	691	256	37.0478	12.3433	62.4397	4	PolyA	MER61A	LTR/ERV1	chr1	4484489	4484825	+	15.61	LineageSpe
XLOC_000033	linc-AJAP1-3	TCONS_00000003	lincRNA	chr1	4472111	4484744	+	12634	2074	MIDDLE	5	chr1	4483408	4483508	101	70	69.3069	3.37512	62.4397	4	SPL	LTR16A1	LTR/ERVL	chr1	4483088	4483477	+	26.34	Ancient
XLOC_000033	linc-AJAP1-3	TCONS_00000003	lincRNA	chr1	4472111	4484744	+	12634	2074	FIRST	1	chr1	4472111	4472692	582	359	61.6838	17.3095	62.4397	4	TSS	MER50	LTR/ERV1	chr1	4471754	4472469	-	15.84	Ancient
XLOC_000033	linc-AJAP1-3	TCONS_00000003	lincRNA	chr1	4472111	4484744	+	12634	2074	LAST	6	chr1	4484054	4484744	691	298	43.1259	14.3684	62.4397	4	exonized	MLT1C	LTR/ERVL-MaLR	chr1	4484116	4484413	+	21.68	Ancient
XLOC_000033	linc-AJAP1-3	TCONS_00000824	lincRNA	chr1	4472239	4484708	+	12470	1493	LAST	5	chr1	4484054	4484708	655	52	7.93893	3.48292	74.0121	4	SPL	MER31B	LTR/ERV1	chr1	4483899	4484105	+	19.8	Ancient
XLOC_000033	linc-AJAP1-3	TCONS_00000824	lincRNA	chr1	4472239	4484708	+	12470	1493	LAST	5	chr1	4484054	4484708	655	220	33.5878	14.7354	74.0121	4	PolyA	MER61A	LTR/ERV1	chr1	4484489	4484825	+	15.61	LineageSpe
XLOC_000033	linc-AJAP1-3	TCONS_00000824	lincRNA	chr1	4472239	4484708	+	12470	1493	LAST	5	chr1	4484054	4484708	655	298	45.4962	19.9598	74.0121	4	exonized	MLT1C	LTR/ERVL-MaLR	chr1	4484116	4484413	+	21.68	Ancient
XLOC_000033	linc-AJAP1-3	TCONS_00000824	lincRNA	chr1	4472239	4484708	+	12470	1493	FIRST	1	chr1	4472239	4472409	171	171	100	11.4534	74.0121	4	TSS_SPL	MER50	LTR/ERV1	chr1	4471754	4472469	-	15.84	Ancient
XLOC_000033	linc-AJAP1-3	TCONS_00000824	lincRNA	chr1	4472239	4484708	+	12470	1493	MIDDLE	4	chr1	4483114	4483508	395	364	92.1519	24.3804	74.0121	4	SPL	LTR16A1	LTR/ERVL	chr1	4483088	4483477	+	26.34	Ancient
XLOC_000033	linc-AJAP1-3	TCONS_00000825	lincRNA	chr1	4472568	4484721	+	12154	1166	LAST	5	chr1	4484054	4484721	668	52	7.78443	4.45969	64.5798	4	SPL	MER31B	LTR/ERV1	chr1	4483899	4484105	+	19.8	Ancient
XLOC_000033	linc-AJAP1-3	TCONS_00000825	lincRNA	chr1	4472568	4484721	+	12154	1166	FIRST	1	chr1	4472568	4472692	125	100	80	8.57633	64.5798	4	SPL	L1ME3G	LINE/L1	chr1	4472593	4473403	-	27.94	Ancient
XLOC_000033	linc-AJAP1-3	TCONS_00000825	lincRNA	chr1	4472568	4484721	+	12154	1166	LAST	5	chr1	4484054	4484721	668	233	34.8802	19.9828	64.5798	4	PolyA	MER61A	LTR/ERV1	chr1	4484489	4484825	+	15.61	LineageSpe
XLOC_000033	linc-AJAP1-3	TCONS_00000825	lincRNA	chr1	4472568	4484721	+	12154	1166	MIDDLE	4	chr1	4483408	4483508	101	70	69.3069	6.00343	64.5798	4	SPL	LTR16A1	LTR/ERVL	chr1	4483088	4483477	+	26.34	Ancient
XLOC_000033	linc-AJAP1-3	TCONS_00000825	lincRNA	chr1	4472568	4484721	+	12154	1166	LAST	5	chr1	4484054	4484721	668	298	44.6108	25.5575	64.5798	4	exonized	MLT1C	LTR/ERVL-MaLR	chr1	4484116	4484413	+	21.68	Ancient
XLOC_000033	linc-AJAP1-3	TCONS_00001927	lincRNA	chr1	4483000	4484708	+	1709	1164	LAST	2	chr1	4484054	4484708	655	52	7.93893	4.46735	82.4742	4	SPL	MER31B	LTR/ERV1	chr1	4483899	4484105	+	19.8	Ancient
XLOC_000033	linc-AJAP1-3	TCONS_00001927	lincRNA	chr1	4483000	4484708	+	1709	1164	LAST	2	chr1	4484054	4484708	655	220	33.5878	18.9003	82.4742	4	PolyA	MER61A	LTR/ERV1	chr1	4484489	4484825	+	15.61	LineageSpe
XLOC_000033	linc-AJAP1-3	TCONS_00001927	lincRNA	chr1	4483000	4484708	+	1709	1164	LAST	2	chr1	4484054	4484708	655	298	45.4962	25.6014	82.4742	4	exonized	MLT1C	LTR/ERVL-MaLR	chr1	4484116	4484413	+	21.68	Ancient
XLOC_000033	linc-AJAP1-3	TCONS_00001927	lincRNA	chr1	4483000	4484708	+	1709	1164	FIRST	1	chr1	4483000	4483508	509	390	76.6208	33.5052	82.4742	4	exonized	LTR16A1	LTR/ERVL	chr1	4483088	4483477	+	26.34	Ancient
XLOC_000035	linc-AJAP1-1	TCONS_00000145	lincRNA	chr1	4631608	4643481	+	11874	682	FIRST	1	chr1	4631608	4631689	82	70	85.3659	10.2639	70.8211	3	SPL	MER103C	DNA/hAT-Charlie	chr1	4631620	4631820	+	28.01	Ancient
XLOC_000035	linc-AJAP1-1	TCONS_00000145	lincRNA	chr1	4631608	4643481	+	11874	682	MIDDLE	3	chr1	4642337	4642634	298	290	97.3154	42.522	70.8211	3	SPL	MLT1N2	LTR/ERVL-MaLR	chr1	4642345	4642702	-	29.6	Ancient
XLOC_000035	linc-AJAP1-1	TCONS_00000145	lincRNA	chr1	4631608	4643481	+	11874	682	MIDDLE	2	chr1	4632530	4632652	123	123	100	18.0352	70.8211	3	Both_SPL	L1MD3	LINE/L1	chr1	4632523	4633268	-	21.85	Ancient
XLOC_000035	linc-AJAP1-1	TCONS_00000826	lincRNA	chr1	4631587	4644273	+	12687	420	LAST	2	chr1	4643957	4644273	317	317	100	75.4762	92.1429	3	PolyA_SPL	MLT2D	LTR/ERVL	chr1	4643933	4644342	-	19.39	Ancient
XLOC_000035	linc-AJAP1-1	TCONS_00000826	lincRNA	chr1	4631587	4644273	+	12687	420	FIRST	1	chr1	4631587	4631689	103	70	67.9612	16.6667	92.1429	3	SPL	MER103C	DNA/hAT-Charlie	chr1	4631620	4631820	+	28.01	Ancient
XLOC_000035	linc-AJAP1-1	TCONS_00000827	lincRNA	chr1	4631589	4653707	+	22119	820	LAST	3	chr1	4653112	4653707	596	42	7.04698	5.12195	28.6585	3	SPL	L2a	LINE/L2	chr1	4652764	4653153	+	29.37	Ancient
XLOC_000035	linc-AJAP1-1	TCONS_00000827	lincRNA	chr1	4631589	4653707	+	22119	820	MIDDLE	2	chr1	4632530	4632652	123	123	100	15	28.6585	3	Both_SPL	L1MD3	LINE/L1	chr1	4632523	4633268	-	21.85	Ancient
XLOC_000035	linc-AJAP1-1	TCONS_00000827	lincRNA	chr1	4631589	4653707	+	22119	820	FIRST	1	chr1	4631589	4631689	101	70	69.3069	8.53659	28.6585	3	SPL	MER103C	DNA/hAT-Charlie	chr1	4631620	4631820	+	28.01	Ancient
XLOC_000036	linc-KCNAB2-2	TCONS_00000828	lincRNA	chr1	5058072	5080898	+	22827	262	MIDDLE	2	chr1	5058655	5058758	104	68	65.3846	25.9542	25.9542	7	SPL	LTR16E2	LTR/ERVL	chr1	5058691	5059020	+	31.31	Ancient
XLOC_000036	linc-KCNAB2-2	TCONS_00000829	lincRNA	chr1	5062414	5064046	+	1633	330	LAST	2	chr1	5063750	5064046	297	297	100	90	90	7	PolyA_SPL	MLT1F2	LTR/ERVL-MaLR	chr1	5063676	5064194	-	24.38	Ancient
XLOC_000036	linc-KCNAB2-2	TCONS_00001928	lincRNA	chr1	5058062	5063844	+	5783	426	LAST	5	chr1	5063750	5063844	95	95	100	22.3005	38.2629	7	PolyA_SPL	MLT1F2	LTR/ERVL-MaLR	chr1	5063676	5064194	-	24.38	Ancient
XLOC_000036	linc-KCNAB2-2	TCONS_00001928	lincRNA	chr1	5058062	5063844	+	5783	426	MIDDLE	2	chr1	5058655	5058758	104	68	65.3846	15.9624	38.2629	7	SPL	LTR16E2	LTR/ERVL	chr1	5058691	5059020	+	31.31	Ancient
XLOC_000036	linc-KCNAB2-2	TCONS_00001929	lincRNA	chr1	5058062	5063844	+	5783	482	LAST	5	chr1	5063750	5063844	95	95	100	19.7095	33.8174	7	PolyA_SPL	MLT1F2	LTR/ERVL-MaLR	chr1	5063676	5064194	-	24.38	Ancient
XLOC_000036	linc-KCNAB2-2	TCONS_00001929	lincRNA	chr1	5058062	5063844	+	5783	482	MIDDLE	2	chr1	5058655	5058758	104	68	65.3846	14.1079	33.8174	7	SPL	LTR16E2	LTR/ERVL	chr1	5058691	5059020	+	31.31	Ancient
XLOC_000036	linc-KCNAB2-2	TCONS_00001930	lincRNA	chr1	5058062	5075860	+	17799	223	MIDDLE	2	chr1	5058655	5058758	104	68	65.3846	30.4933	30.4933	7	SPL	LTR16E2	LTR/ERVL	chr1	5058691	5059020	+	31.31	Ancient
XLOC_000036	linc-KCNAB2-2	TCONS_00001931	lincRNA	chr1	5058062	5075860	+	17799	279	MIDDLE	2	chr1	5058655	5058758	104	68	65.3846	24.3728	24.3728	7	SPL	LTR16E2	LTR/ERVL	chr1	5058691	5059020	+	31.31	Ancient
XLOC_000036	linc-KCNAB2-2	TCONS_00001932	lincRNA	chr1	5058062	5080898	+	22837	328	MIDDLE	2	chr1	5058655	5058758	104	68	65.3846	20.7317	20.7317	7	SPL	LTR16E2	LTR/ERVL	chr1	5058691	5059020	+	31.31	Ancient
XLOC_000037	linc-KCNAB2-1	TCONS_00000830	lincRNA	chr1	5550602	5551645	+	1044	951	LAST	2	chr1	5551202	5551645	444	110	24.7748	11.5668	27.0242	1	exonized	MARNA	DNA/TcMar-Mariner	chr1	5551330	5551439	-	29.29	Ancient
XLOC_000037	linc-KCNAB2-1	TCONS_00000830	lincRNA	chr1	5550602	5551645	+	1044	951	LAST	2	chr1	5551202	5551645	444	147	33.1081	15.4574	27.0242	1	PolyA	MIR	SINE/MIR	chr1	5551499	5551729	+	27.84	Ancient
XLOC_000041	linc-CAMTA1-1	TCONS_00000147	lincRNA	chr1	6784697	6787468	+	2772	1686	LAST	2	chr1	6785997	6787468	1472	12	0.815217	0.711744	87.3072	4	PolyA	L2a	LINE/L2	chr1	6787457	6787552	+	29.37	Ancient
XLOC_000041	linc-CAMTA1-1	TCONS_00000147	lincRNA	chr1	6784697	6787468	+	2772	1686	LAST	2	chr1	6785997	6787468	1472	322	21.875	19.0985	87.3072	4	exonized	AluSx1	SINE/Alu	chr1	6787135	6787456	+	11.14	LineageSpe
XLOC_000041	linc-CAMTA1-1	TCONS_00000147	lincRNA	chr1	6784697	6787468	+	2772	1686	LAST	2	chr1	6785997	6787468	1472	297	20.1766	17.6157	87.3072	4	exonized	AluSz	SINE/Alu	chr1	6786656	6786952	+	12.11	LineageSpe
XLOC_000041	linc-CAMTA1-1	TCONS_00000147	lincRNA	chr1	6784697	6787468	+	2772	1686	LAST	2	chr1	6785997	6787468	1472	182	12.3641	10.7948	87.3072	4	exonized	L2a	LINE/L2	chr1	6786953	6787134	+	29.37	Ancient
XLOC_000041	linc-CAMTA1-1	TCONS_00000147	lincRNA	chr1	6784697	6787468	+	2772	1686	LAST	2	chr1	6785997	6787468	1472	659	44.769	39.0866	87.3072	4	SPL	L2a	LINE/L2	chr1	6785974	6786655	+	29.37	Ancient
XLOC_000041	linc-CAMTA1-1	TCONS_00001934	lincRNA	chr1	6784703	6787554	+	2852	270	LAST	2	chr1	6787493	6787554	62	60	96.7742	22.2222	22.2222	4	SPL	L2a	LINE/L2	chr1	6787457	6787552	+	29.37	Ancient
XLOC_000042	linc-SLC45A1-2	TCONS_00000832	lincRNA	chr1	8138470	8185235	+	46766	3743	LAST	2	chr1	8181534	8185235	3702	105	2.8363	2.80524	85.4395	1	exonized	L1MC4	LINE/L1	chr1	8182586	8182690	-	25.02	Ancient
XLOC_000042	linc-SLC45A1-2	TCONS_00000832	lincRNA	chr1	8138470	8185235	+	46766	3743	LAST	2	chr1	8181534	8185235	3702	311	8.40086	8.30884	85.4395	1	exonized	AluJb	SINE/Alu	chr1	8181761	8182071	+	16.49	LineageSpe
XLOC_000042	linc-SLC45A1-2	TCONS_00000832	lincRNA	chr1	8138470	8185235	+	46766	3743	LAST	2	chr1	8181534	8185235	3702	215	5.80767	5.74406	85.4395	1	exonized	L1MC4	LINE/L1	chr1	8183232	8183446	-	25.02	Ancient
XLOC_000042	linc-SLC45A1-2	TCONS_00000832	lincRNA	chr1	8138470	8185235	+	46766	3743	LAST	2	chr1	8181534	8185235	3702	118	3.18747	3.15255	85.4395	1	PolyA	AluSx	SINE/Alu	chr1	8185118	8185415	+	11.66	LineageSpe
XLOC_000042	linc-SLC45A1-2	TCONS_00000832	lincRNA	chr1	8138470	8185235	+	46766	3743	LAST	2	chr1	8181534	8185235	3702	247	6.67207	6.59898	85.4395	1	exonized	L1MC4	LINE/L1	chr1	8184505	8184751	-	25.02	Ancient
XLOC_000042	linc-SLC45A1-2	TCONS_00000832	lincRNA	chr1	8138470	8185235	+	46766	3743	LAST	2	chr1	8181534	8185235	3702	245	6.61804	6.54555	85.4395	1	exonized	L2b	LINE/L2	chr1	8182137	8182381	-	32.38	Ancient
XLOC_000042	linc-SLC45A1-2	TCONS_00000832	lincRNA	chr1	8138470	8185235	+	46766	3743	LAST	2	chr1	8181534	8185235	3702	358	9.67045	9.56452	85.4395	1	exonized	L1MC4	LINE/L1	chr1	8184760	8185117	-	25.02	Ancient
XLOC_000042	linc-SLC45A1-2	TCONS_00000832	lincRNA	chr1	8138470	8185235	+	46766	3743	LAST	2	chr1	8181534	8185235	3702	313	8.45489	8.36228	85.4395	1	exonized	AluSp	SINE/Alu	chr1	8183927	8184239	-	9.53	LineageSpe
XLOC_000042	linc-SLC45A1-2	TCONS_00000832	lincRNA	chr1	8138470	8185235	+	46766	3743	LAST	2	chr1	8181534	8185235	3702	480	12.966	12.8239	85.4395	1	exonized	LTR8	LTR/ERV1	chr1	8183447	8183926	-	14.92	LineageSpe
XLOC_000042	linc-SLC45A1-2	TCONS_00000832	lincRNA	chr1	8138470	8185235	+	46766	3743	LAST	2	chr1	8181534	8185235	3702	265	7.15829	7.07988	85.4395	1	exonized	LTR8	LTR/ERV1	chr1	8184240	8184504	-	14.92	LineageSpe
XLOC_000042	linc-SLC45A1-2	TCONS_00000832	lincRNA	chr1	8138470	8185235	+	46766	3743	LAST	2	chr1	8181534	8185235	3702	541	14.6137	14.4536	85.4395	1	exonized	MER41A	LTR/ERV1	chr1	8182691	8183231	-	9.01	LineageSpe
XLOC_000043	linc-SLC45A1-1	TCONS_00000150	lincRNA	chr1	8268732	8275270	+	6539	497	FIRST	1	chr1	8268732	8268933	202	24	11.8812	4.82897	31.7907	1	TSS	MIR3	SINE/MIR	chr1	8268660	8268755	-	29.77	Ancient
XLOC_000043	linc-SLC45A1-1	TCONS_00000150	lincRNA	chr1	8268732	8275270	+	6539	497	LAST	4	chr1	8275139	8275270	132	84	63.6364	16.9014	31.7907	1	exonized	L1PB1	LINE/L1	chr1	8275157	8275240	+	10.56	LineageSpe
XLOC_000043	linc-SLC45A1-1	TCONS_00000150	lincRNA	chr1	8268732	8275270	+	6539	497	MIDDLE	3	chr1	8274685	8274738	54	50	92.5926	10.0604	31.7907	1	SPL	L2c	LINE/L2	chr1	8274689	8274799	-	32.46	Ancient
XLOC_000048	linc-PEX14-1	TCONS_00000152	lincRNA	chr1	10518612	10519395	+	784	467	LAST	2	chr1	10519147	10519395	249	64	25.7028	13.7045	60.3854	2	SPL	AluSx3	SINE/Alu	chr1	10518914	10519210	-	11.23	LineageSpe
XLOC_000048	linc-PEX14-1	TCONS_00000152	lincRNA	chr1	10518612	10519395	+	784	467	FIRST	1	chr1	10518612	10518829	218	218	100	46.6809	60.3854	2	TSS_SPL	AluSx1	SINE/Alu	chr1	10518592	10518893	-	11.14	LineageSpe
XLOC_000048	linc-PEX14-1	TCONS_00001938	lincRNA	chr1	10516603	10520093	+	3491	1132	LAST	2	chr1	10519349	10520093	745	182	24.4295	16.0777	22.6148	2	exonized	AluJr	SINE/Alu	chr1	10519807	10519988	-	16.75	LineageSpe
XLOC_000048	linc-PEX14-1	TCONS_00001938	lincRNA	chr1	10516603	10520093	+	3491	1132	LAST	2	chr1	10519349	10520093	745	74	9.93289	6.5371	22.6148	2	PolyA	AluSx	SINE/Alu	chr1	10520020	10520318	+	11.66	LineageSpe
XLOC_000051	linc-PTCHD2-2	TCONS_00000838	lincRNA	chr1	11418037	11424587	+	6551	717	LAST	4	chr1	11424193	11424587	395	106	26.8354	14.7838	35.1464	1	PolyA	AluSx	SINE/Alu	chr1	11424482	11424779	+	11.66	LineageSpe
XLOC_000051	linc-PTCHD2-2	TCONS_00000838	lincRNA	chr1	11418037	11424587	+	6551	717	MIDDLE	3	chr1	11423840	11423896	57	57	100	7.94979	35.1464	1	Both_SPL	LTR16E1	LTR/ERVL	chr1	11423664	11423974	-	29.32	Ancient
XLOC_000051	linc-PTCHD2-2	TCONS_00000838	lincRNA	chr1	11418037	11424587	+	6551	717	LAST	4	chr1	11424193	11424587	395	89	22.5316	12.4128	35.1464	1	exonized	L2b	LINE/L2	chr1	11424205	11424293	+	32.38	Ancient
XLOC_000052	linc-PTCHD2-1	TCONS_00000839	lincRNA	chr1	11432762	11438744	+	5983	1923	FIRST	1	chr1	11432762	11433136	375	51	13.6	2.65211	74.675	1	SPL	MIRc	SINE/MIR	chr1	11433086	11433289	+	29.57	Ancient
XLOC_000052	linc-PTCHD2-1	TCONS_00000839	lincRNA	chr1	11432762	11438744	+	5983	1923	LAST	3	chr1	11437344	11438744	1401	75	5.35332	3.90016	74.675	1	PolyA	MER20	DNA/hAT-Charlie	chr1	11438670	11438776	+	20.22	Ancient
XLOC_000052	linc-PTCHD2-1	TCONS_00000839	lincRNA	chr1	11432762	11438744	+	5983	1923	LAST	3	chr1	11437344	11438744	1401	162	11.5632	8.42434	74.675	1	exonized	MIRb	SINE/MIR	chr1	11437903	11438064	+	29.76	Ancient
XLOC_000052	linc-PTCHD2-1	TCONS_00000839	lincRNA	chr1	11432762	11438744	+	5983	1923	LAST	3	chr1	11437344	11438744	1401	298	21.2705	15.4966	74.675	1	exonized	AluJr	SINE/Alu	chr1	11437595	11437892	-	16.75	LineageSpe
XLOC_000052	linc-PTCHD2-1	TCONS_00000839	lincRNA	chr1	11432762	11438744	+	5983	1923	FIRST	1	chr1	11432762	11433136	375	94	25.0667	4.8882	74.675	1	exonized	MIRc	SINE/MIR	chr1	11432792	11432885	-	29.57	Ancient
XLOC_000052	linc-PTCHD2-1	TCONS_00000839	lincRNA	chr1	11432762	11438744	+	5983	1923	LAST	3	chr1	11437344	11438744	1401	265	18.9151	13.7806	74.675	1	exonized	ERV3-16A3_I-int	LTR/ERVL	chr1	11438232	11438496	+	28.49	Ancient
XLOC_000052	linc-PTCHD2-1	TCONS_00000839	lincRNA	chr1	11432762	11438744	+	5983	1923	LAST	3	chr1	11437344	11438744	1401	230	16.4168	11.9605	74.675	1	SPL	MLT1J2	LTR/ERVL-MaLR	chr1	11437297	11437573	+	28.4	Ancient
XLOC_000052	linc-PTCHD2-1	TCONS_00000839	lincRNA	chr1	11432762	11438744	+	5983	1923	LAST	3	chr1	11437344	11438744	1401	134	9.5646	6.96828	74.675	1	exonized	LTR16	LTR/ERVL	chr1	11438065	11438198	+	27.41	LineageSpe
XLOC_000052	linc-PTCHD2-1	TCONS_00000839	lincRNA	chr1	11432762	11438744	+	5983	1923	LAST	3	chr1	11437344	11438744	1401	127	9.06495	6.60426	74.675	1	exonized	AluJr	SINE/Alu	chr1	11438497	11438623	+	16.75	LineageSpe
XLOC_000053	linc-FBXO44-1	TCONS_00000153	lincRNA	chr1	11669588	11673412	+	3825	1285	LAST	3	chr1	11672847	11673412	566	152	26.8551	11.8288	79.3774	1	exonized	MLT2D	LTR/ERVL	chr1	11672949	11673100	-	19.39	Ancient
XLOC_000053	linc-FBXO44-1	TCONS_00000153	lincRNA	chr1	11669588	11673412	+	3825	1285	FIRST	1	chr1	11669588	11670170	583	35	6.00343	2.72374	79.3774	1	exonized	MLT1I	LTR/ERVL-MaLR	chr1	11669978	11670012	+	29.11	Ancient
XLOC_000053	linc-FBXO44-1	TCONS_00000153	lincRNA	chr1	11669588	11673412	+	3825	1285	MIDDLE	2	chr1	11671900	11672035	136	131	96.3235	10.1946	79.3774	1	SPL	MLT1K	LTR/ERVL-MaLR	chr1	11671707	11672030	-	29.25	Ancient
XLOC_000053	linc-FBXO44-1	TCONS_00000153	lincRNA	chr1	11669588	11673412	+	3825	1285	LAST	3	chr1	11672847	11673412	566	312	55.1237	24.2802	79.3774	1	PolyA	THE1B	LTR/ERVL-MaLR	chr1	11673101	11673464	+	12.8	LineageSpe
XLOC_000053	linc-FBXO44-1	TCONS_00000153	lincRNA	chr1	11669588	11673412	+	3825	1285	FIRST	1	chr1	11669588	11670170	583	390	66.8954	30.3502	79.3774	1	TSS	LTR12C	LTR/ERV1	chr1	11668626	11669977	+	8.77	LineageSpe
XLOC_000055	linc-AADACL4-1	TCONS_00000840	lincRNA	chr1	12587486	12588702	+	1217	960	FIRST	1	chr1	12587486	12587834	349	81	23.2092	8.4375	8.4375	2	TSS	MER33	DNA/hAT-Charlie	chr1	12587299	12587566	-	18.93	Ancient
XLOC_000056	linc-PRDM2-1	TCONS_00000841	lincRNA	chr1	13997965	14001403	+	3439	915	LAST	2	chr1	14000736	14001403	668	157	23.503	17.1585	93.6612	1	exonized	AluSp	SINE/Alu	chr1	14001161	14001317	+	9.53	LineageSpe
XLOC_000056	linc-PRDM2-1	TCONS_00000841	lincRNA	chr1	13997965	14001403	+	3439	915	LAST	2	chr1	14000736	14001403	668	73	10.9281	7.97814	93.6612	1	exonized	L1MEh	LINE/L1	chr1	14001322	14001394	-	28.12	Ancient
XLOC_000056	linc-PRDM2-1	TCONS_00000841	lincRNA	chr1	13997965	14001403	+	3439	915	LAST	2	chr1	14000736	14001403	668	158	23.6527	17.2678	93.6612	1	SPL	L1MEh	LINE/L1	chr1	14000725	14000893	-	28.12	Ancient
XLOC_000056	linc-PRDM2-1	TCONS_00000841	lincRNA	chr1	13997965	14001403	+	3439	915	FIRST	1	chr1	13997965	13998211	247	247	100	26.9945	93.6612	1	TSS_SPL	Charlie25	DNA/hAT-Charlie	chr1	13997952	13998308	-	28.45	Ancient
XLOC_000056	linc-PRDM2-1	TCONS_00000841	lincRNA	chr1	13997965	14001403	+	3439	915	LAST	2	chr1	14000736	14001403	668	222	33.2335	24.2623	93.6612	1	exonized	L1MEh	LINE/L1	chr1	14000912	14001133	-	28.12	Ancient
XLOC_000057	linc-KAZ-1	TCONS_00000842	lincRNA	chr1	14531974	14532868	+	895	649	FIRST	1	chr1	14531974	14532571	598	292	48.8294	44.9923	62.7119	1	exonized	AluSc5	SINE/Alu	chr1	14532110	14532401	+	9.26	LineageSpe
XLOC_000057	linc-KAZ-1	TCONS_00000842	lincRNA	chr1	14531974	14532868	+	895	649	FIRST	1	chr1	14531974	14532571	598	115	19.2308	17.7196	62.7119	1	exonized	L1PA4	LINE/L1	chr1	14532404	14532518	+	4.82	LineageSpe
XLOC_000061	linc-C1orf144-2	TCONS_00000846	lincRNA	chr1	16510023	16510657	+	635	514	LAST	2	chr1	16510278	16510657	380	126	33.1579	24.5136	24.5136	1	PolyA	MIRb	SINE/MIR	chr1	16510532	16510758	-	29.76	Ancient
XLOC_000062	linc-C1orf144-1	TCONS_00000847	lincRNA	chr1	16679040	16679908	+	869	382	LAST	2	chr1	16679795	16679908	114	114	100	29.8429	29.8429	1	PolyA_SPL	MER4B	LTR/ERV1	chr1	16679766	16680046	+	12.94	LineageSpe
XLOC_000068	linc-PADI1-1	TCONS_00000159	lincRNA	chr1	17516278	17524112	+	7835	4676	LAST	3	chr1	17519786	17524112	4327	41	0.947539	0.876818	29.3841	1	exonized	MIR3	SINE/MIR	chr1	17521952	17521992	+	29.77	Ancient
XLOC_000068	linc-PADI1-1	TCONS_00000159	lincRNA	chr1	17516278	17524112	+	7835	4676	LAST	3	chr1	17519786	17524112	4327	170	3.92882	3.63559	29.3841	1	exonized	L2b	LINE/L2	chr1	17521469	17521638	-	32.38	Ancient
XLOC_000068	linc-PADI1-1	TCONS_00000159	lincRNA	chr1	17516278	17524112	+	7835	4676	FIRST	1	chr1	17516278	17516425	148	75	50.6757	1.60393	29.3841	1	TSS	L2c	LINE/L2	chr1	17516222	17516352	-	32.46	Ancient
XLOC_000068	linc-PADI1-1	TCONS_00000159	lincRNA	chr1	17516278	17524112	+	7835	4676	LAST	3	chr1	17519786	17524112	4327	260	6.00878	5.56031	29.3841	1	exonized	MIRb	SINE/MIR	chr1	17522655	17522914	+	29.76	Ancient
XLOC_000068	linc-PADI1-1	TCONS_00000159	lincRNA	chr1	17516278	17524112	+	7835	4676	LAST	3	chr1	17519786	17524112	4327	143	3.30483	3.05817	29.3841	1	exonized	L2c	LINE/L2	chr1	17522971	17523113	+	32.46	Ancient
XLOC_000068	linc-PADI1-1	TCONS_00000159	lincRNA	chr1	17516278	17524112	+	7835	4676	LAST	3	chr1	17519786	17524112	4327	98	2.26485	2.09581	29.3841	1	exonized	MIRc	SINE/MIR	chr1	17520597	17520694	+	29.57	Ancient
XLOC_000068	linc-PADI1-1	TCONS_00000159	lincRNA	chr1	17516278	17524112	+	7835	4676	LAST	3	chr1	17519786	17524112	4327	115	2.65773	2.45937	29.3841	1	exonized	MIR3	SINE/MIR	chr1	17520473	17520587	+	29.77	Ancient
XLOC_000068	linc-PADI1-1	TCONS_00000159	lincRNA	chr1	17516278	17524112	+	7835	4676	LAST	3	chr1	17519786	17524112	4327	472	10.9083	10.0941	29.3841	1	exonized	L4_A_Mam	LINE/RTE-X	chr1	17523569	17524040	+	30.93	Ancient
XLOC_000070	linc-ACTL8-1	TCONS_00000160	lincRNA	chr1	18044182	18076473	+	32292	610	MIDDLE	2	chr1	18045055	18045215	161	75	46.5839	12.2951	81.1475	2	SPL	MIR	SINE/MIR	chr1	18044947	18045129	-	27.84	Ancient
XLOC_000070	linc-ACTL8-1	TCONS_00000160	lincRNA	chr1	18044182	18076473	+	32292	610	MIDDLE	2	chr1	18045055	18045215	161	29	18.0124	4.7541	81.1475	2	SPL	L2b	LINE/L2	chr1	18045187	18045266	-	32.38	Ancient
XLOC_000070	linc-ACTL8-1	TCONS_00000160	lincRNA	chr1	18044182	18076473	+	32292	610	LAST	4	chr1	18076172	18076473	302	302	100	49.5082	81.1475	2	PolyA_SPL	MLT1F	LTR/ERVL-MaLR	chr1	18075993	18076521	+	23.58	Ancient
XLOC_000070	linc-ACTL8-1	TCONS_00000160	lincRNA	chr1	18044182	18076473	+	32292	610	MIDDLE	3	chr1	18048175	18048263	89	89	100	14.5902	81.1475	2	Both_SPL	MLT1K	LTR/ERVL-MaLR	chr1	18048001	18048410	-	29.25	Ancient
XLOC_000070	linc-ACTL8-1	TCONS_00000852	lincRNA	chr1	18044250	18048841	+	4592	846	LAST	3	chr1	18048175	18048841	667	96	14.3928	11.3475	59.1017	2	exonized	L1M5	LINE/L1	chr1	18048746	18048841	+	28.23	Ancient
XLOC_000070	linc-ACTL8-1	TCONS_00000852	lincRNA	chr1	18044250	18048841	+	4592	846	MIDDLE	2	chr1	18045060	18045215	156	70	44.8718	8.27423	59.1017	2	SPL	MIR	SINE/MIR	chr1	18044947	18045129	-	27.84	Ancient
XLOC_000070	linc-ACTL8-1	TCONS_00000852	lincRNA	chr1	18044250	18048841	+	4592	846	LAST	3	chr1	18048175	18048841	667	69	10.3448	8.15603	59.1017	2	exonized	MIRb	SINE/MIR	chr1	18048530	18048598	-	29.76	Ancient
XLOC_000070	linc-ACTL8-1	TCONS_00000852	lincRNA	chr1	18044250	18048841	+	4592	846	MIDDLE	2	chr1	18045060	18045215	156	29	18.5897	3.4279	59.1017	2	SPL	L2b	LINE/L2	chr1	18045187	18045266	-	32.38	Ancient
XLOC_000070	linc-ACTL8-1	TCONS_00000852	lincRNA	chr1	18044250	18048841	+	4592	846	LAST	3	chr1	18048175	18048841	667	236	35.3823	27.896	59.1017	2	SPL	MLT1K	LTR/ERVL-MaLR	chr1	18048001	18048410	-	29.25	Ancient
XLOC_000071	linc-KLHDC7A-1	TCONS_00000161	lincRNA	chr1	18712323	18715008	+	2686	491	LAST	2	chr1	18714910	18715008	99	13	13.1313	2.64766	46.4358	1	SPL	MLT1A0	LTR/ERVL-MaLR	chr1	18714615	18714922	+	19.59	Ancient
XLOC_000071	linc-KLHDC7A-1	TCONS_00000161	lincRNA	chr1	18712323	18715008	+	2686	491	FIRST	1	chr1	18712323	18712714	392	215	54.8469	43.7882	46.4358	1	SPL	MIR	SINE/MIR	chr1	18712500	18712743	+	27.84	Ancient
XLOC_000076	linc-C1orf151-2	TCONS_00000855	lincRNA	chr1	19658090	19660931	+	2842	2460	LAST	2	chr1	19659263	19660931	1669	49	2.93589	1.99187	36.748	1	exonized	MIR	SINE/MIR	chr1	19660576	19660624	+	27.84	Ancient
XLOC_000076	linc-C1orf151-2	TCONS_00000855	lincRNA	chr1	19658090	19660931	+	2842	2460	LAST	2	chr1	19659263	19660931	1669	77	4.61354	3.13008	36.748	1	exonized	L2c	LINE/L2	chr1	19660650	19660726	+	32.46	Ancient
XLOC_000076	linc-C1orf151-2	TCONS_00000855	lincRNA	chr1	19658090	19660931	+	2842	2460	FIRST	1	chr1	19658090	19658880	791	181	22.8824	7.35772	36.748	1	SPL	MIRb	SINE/MIR	chr1	19658700	19658913	+	29.76	Ancient
XLOC_000076	linc-C1orf151-2	TCONS_00000855	lincRNA	chr1	19658090	19660931	+	2842	2460	LAST	2	chr1	19659263	19660931	1669	251	15.0389	10.2033	36.748	1	exonized	AluJb	SINE/Alu	chr1	19659705	19659955	-	16.49	LineageSpe
XLOC_000076	linc-C1orf151-2	TCONS_00000855	lincRNA	chr1	19658090	19660931	+	2842	2460	LAST	2	chr1	19659263	19660931	1669	76	4.55362	3.08943	36.748	1	exonized	L1MB8	LINE/L1	chr1	19660792	19660867	+	19.45	Ancient
XLOC_000076	linc-C1orf151-2	TCONS_00000855	lincRNA	chr1	19658090	19660931	+	2842	2460	LAST	2	chr1	19659263	19660931	1669	270	16.1774	10.9756	36.748	1	exonized	AluJb	SINE/Alu	chr1	19660164	19660433	+	16.49	LineageSpe
XLOC_000077	linc-C1orf151-1	TCONS_00000856	lincRNA	chr1	19852670	19858268	+	5599	321	LAST	2	chr1	19857995	19858268	274	274	100	85.3583	100	1	PolyA_SPL	MLT1F1	LTR/ERVL-MaLR	chr1	19857794	19858326	+	22.79	Ancient
XLOC_000077	linc-C1orf151-1	TCONS_00000856	lincRNA	chr1	19852670	19858268	+	5599	321	FIRST	1	chr1	19852670	19852716	47	47	100	14.6417	100	1	TSS_SPL	MIR	SINE/MIR	chr1	19852535	19852773	-	27.84	Ancient
XLOC_000082	linc-VWA5B1-2	TCONS_00000859	lincRNA	chr1	20527034	20529294	+	2261	1245	LAST	2	chr1	20528158	20529294	1137	179	15.7432	14.3775	39.3574	2	PolyA	L2a	LINE/L2	chr1	20529116	20529295	+	29.37	Ancient
XLOC_000082	linc-VWA5B1-2	TCONS_00000859	lincRNA	chr1	20527034	20529294	+	2261	1245	LAST	2	chr1	20528158	20529294	1137	118	10.3782	9.47791	39.3574	2	exonized	Plat_L3	LINE/CR1	chr1	20528497	20528614	+	31.39	Ancient
XLOC_000082	linc-VWA5B1-2	TCONS_00000859	lincRNA	chr1	20527034	20529294	+	2261	1245	FIRST	1	chr1	20527034	20527141	108	108	100	8.6747	39.3574	2	TSS_SPL	L2c	LINE/L2	chr1	20527022	20527156	-	32.46	Ancient
XLOC_000082	linc-VWA5B1-2	TCONS_00000859	lincRNA	chr1	20527034	20529294	+	2261	1245	LAST	2	chr1	20528158	20529294	1137	85	7.47581	6.82731	39.3574	2	SPL	L2c	LINE/L2	chr1	20528142	20528242	-	32.46	Ancient
XLOC_000082	linc-VWA5B1-2	TCONS_00001952	lincRNA	chr1	20525484	20527153	+	1670	207	LAST	2	chr1	20527038	20527153	116	116	100	56.0386	90.8213	2	PolyA_SPL	L2c	LINE/L2	chr1	20527022	20527156	-	32.46	Ancient
XLOC_000082	linc-VWA5B1-2	TCONS_00001952	lincRNA	chr1	20525484	20527153	+	1670	207	FIRST	1	chr1	20525484	20525574	91	72	79.1209	34.7826	90.8213	2	TSS	L2c	LINE/L2	chr1	20525436	20525555	-	32.46	Ancient
XLOC_000083	linc-VWA5B1-1	TCONS_00000163	lincRNA	chr1	20569588	20571148	+	1561	480	LAST	2	chr1	20570789	20571148	360	110	30.5556	22.9167	75	1	SPL	MER81	DNA/hAT-Blackjack	chr1	20570786	20570898	-	24.1	Ancient
XLOC_000083	linc-VWA5B1-1	TCONS_00000163	lincRNA	chr1	20569588	20571148	+	1561	480	LAST	2	chr1	20570789	20571148	360	250	69.4444	52.0833	75	1	PolyA	MLT1H	LTR/ERVL-MaLR	chr1	20570899	20571222	+	26.7	Ancient
XLOC_000085	linc-NBPF3-2	TCONS_00000165	lincRNA	chr1	21742815	21743867	+	1053	605	LAST	3	chr1	21743711	21743867	157	118	75.1592	19.5041	28.2645	1	SPL	L1ME3Cz	LINE/L1	chr1	21743562	21743828	+	26.99	Ancient
XLOC_000085	linc-NBPF3-2	TCONS_00000165	lincRNA	chr1	21742815	21743867	+	1053	605	MIDDLE	2	chr1	21743465	21743614	150	53	35.3333	8.76033	28.2645	1	SPL	L1ME3Cz	LINE/L1	chr1	21743562	21743828	+	26.99	Ancient
XLOC_000086	linc-NBPF3-1	TCONS_00000861	lincRNA	chr1	21744782	21746509	+	1728	228	LAST	2	chr1	21746322	21746509	188	188	100	82.4561	82.4561	1	PolyA_SPL	L1MEc	LINE/L1	chr1	21746114	21746883	-	25.01	Ancient
XLOC_000087	linc-LDLRAD2-2	TCONS_00000166	lincRNA	chr1	21912965	21917680	+	4716	821	FIRST	1	chr1	21912965	21913582	618	107	17.3139	13.0329	41.7783	1	TSS	L4_C_Mam	LINE/RTE-X	chr1	21912846	21913071	-	30.96	Ancient
XLOC_000087	linc-LDLRAD2-2	TCONS_00000166	lincRNA	chr1	21912965	21917680	+	4716	821	FIRST	1	chr1	21912965	21913582	618	236	38.1877	28.7454	41.7783	1	exonized	MIR	SINE/MIR	chr1	21913203	21913438	-	27.84	Ancient
XLOC_000090	linc-ZBTB40-1	TCONS_00000863	lincRNA	chr1	22582820	22584588	+	1769	557	LAST	2	chr1	22584152	22584588	437	105	24.0275	18.851	33.9318	2	SPL	MIRc	SINE/MIR	chr1	22584106	22584256	-	29.57	Ancient
XLOC_000090	linc-ZBTB40-1	TCONS_00000863	lincRNA	chr1	22582820	22584588	+	1769	557	FIRST	1	chr1	22582820	22582939	120	84	70	15.0808	33.9318	2	SPL	L2	LINE/L2	chr1	22582856	22583003	-	32.38	Ancient
XLOC_000090	linc-ZBTB40-1	TCONS_00001956	lincRNA	chr1	22583495	22584433	+	939	500	LAST	2	chr1	22584152	22584433	282	105	37.234	21	21	2	SPL	MIRc	SINE/MIR	chr1	22584106	22584256	-	29.57	Ancient
XLOC_000091	linc-EPHB2-1	TCONS_00000864	lincRNA	chr1	23007533	23008941	+	1409	419	LAST	2	chr1	23008544	23008941	398	119	29.8995	28.401	88.0668	1	exonized	MIRb	SINE/MIR	chr1	23008823	23008941	-	29.76	Ancient
XLOC_000091	linc-EPHB2-1	TCONS_00000864	lincRNA	chr1	23007533	23008941	+	1409	419	LAST	2	chr1	23008544	23008941	398	250	62.8141	59.6659	88.0668	1	exonized	MLT1C	LTR/ERVL-MaLR	chr1	23008549	23008798	-	21.68	Ancient
XLOC_000094	linc-RPL11-1	TCONS_00000866	lincRNA	chr1	23908137	23919157	+	11021	218	FIRST	1	chr1	23908137	23908168	32	32	100	14.6789	14.6789	1	TSS_SPL	Charlie15a	DNA/hAT-Charlie	chr1	23908106	23908179	+	29.15	Ancient
XLOC_000098	linc-GRHL3-1	TCONS_00000004	lincRNA	chr1	24526730	24538180	+	11451	1846	LAST	3	chr1	24536623	24538180	1558	220	14.1207	11.9177	34.7779	2	PolyA	MER33	DNA/hAT-Charlie	chr1	24537961	24538238	+	18.93	Ancient
XLOC_000098	linc-GRHL3-1	TCONS_00000004	lincRNA	chr1	24526730	24538180	+	11451	1846	FIRST	1	chr1	24526730	24526881	152	152	100	8.23402	34.7779	2	TSS_SPL	THE1B	LTR/ERVL-MaLR	chr1	24526601	24526961	+	12.8	LineageSpe
XLOC_000098	linc-GRHL3-1	TCONS_00000004	lincRNA	chr1	24526730	24538180	+	11451	1846	LAST	3	chr1	24536623	24538180	1558	93	5.96919	5.03792	34.7779	2	exonized	MIR3	SINE/MIR	chr1	24537378	24537470	+	29.77	Ancient
XLOC_000098	linc-GRHL3-1	TCONS_00000004	lincRNA	chr1	24526730	24538180	+	11451	1846	LAST	3	chr1	24536623	24538180	1558	177	11.3607	9.5883	34.7779	2	exonized	MIR	SINE/MIR	chr1	24537766	24537942	-	27.84	Ancient
XLOC_000098	linc-GRHL3-1	TCONS_00000167	lincRNA	chr1	24526730	24538183	+	11454	1850	LAST	3	chr1	24536623	24538183	1561	223	14.2857	12.0541	34.8649	2	PolyA	MER33	DNA/hAT-Charlie	chr1	24537961	24538238	+	18.93	Ancient
XLOC_000098	linc-GRHL3-1	TCONS_00000167	lincRNA	chr1	24526730	24538183	+	11454	1850	FIRST	1	chr1	24526730	24526881	152	152	100	8.21622	34.8649	2	TSS_SPL	THE1B	LTR/ERVL-MaLR	chr1	24526601	24526961	+	12.8	LineageSpe
XLOC_000098	linc-GRHL3-1	TCONS_00000167	lincRNA	chr1	24526730	24538183	+	11454	1850	LAST	3	chr1	24536623	24538183	1561	93	5.95772	5.02703	34.8649	2	exonized	MIR3	SINE/MIR	chr1	24537378	24537470	+	29.77	Ancient
XLOC_000098	linc-GRHL3-1	TCONS_00000167	lincRNA	chr1	24526730	24538183	+	11454	1850	LAST	3	chr1	24536623	24538183	1561	177	11.3389	9.56757	34.8649	2	exonized	MIR	SINE/MIR	chr1	24537766	24537942	-	27.84	Ancient
XLOC_000099	linc-RHD-2	TCONS_00001961	lincRNA	chr1	25367664	25373839	+	6176	1015	LAST	3	chr1	25373221	25373839	619	28	4.52342	2.75862	40.7882	1	PolyA	MIRb	SINE/MIR	chr1	25373812	25374021	-	29.76	Ancient
XLOC_000099	linc-RHD-2	TCONS_00001961	lincRNA	chr1	25367664	25373839	+	6176	1015	FIRST	1	chr1	25367664	25367869	206	164	79.6117	16.1576	40.7882	1	SPL	L2c	LINE/L2	chr1	25367706	25367903	-	32.46	Ancient
XLOC_000099	linc-RHD-2	TCONS_00001961	lincRNA	chr1	25367664	25373839	+	6176	1015	MIDDLE	2	chr1	25370204	25370393	190	188	98.9474	18.5222	40.7882	1	SPL	MLT1D	LTR/ERVL-MaLR	chr1	25370015	25370391	-	21.73	Ancient
XLOC_000099	linc-RHD-2	TCONS_00001961	lincRNA	chr1	25367664	25373839	+	6176	1015	MIDDLE	2	chr1	25370204	25370393	190	34	17.8947	3.34975	40.7882	1	SPL	MLT1D-int	LTR/ERVL-MaLR	chr1	25370360	25370641	-	25.42	Ancient
XLOC_000100	linc-RHD-1	TCONS_00000168	lincRNA	chr1	25534630	25535360	+	731	420	FIRST	1	chr1	25534630	25534713	84	71	84.5238	16.9048	99.5238	1	TSS	MLT1L	LTR/ERVL-MaLR	chr1	25534520	25534700	+	28.7	Ancient
XLOC_000100	linc-RHD-1	TCONS_00000168	lincRNA	chr1	25534630	25535360	+	731	420	LAST	2	chr1	25535025	25535360	336	36	10.7143	8.57143	99.5238	1	SPL	LTR5	LTR/ERVK	chr1	25535021	25535060	-	7.02	LineageSpe
XLOC_000100	linc-RHD-1	TCONS_00000168	lincRNA	chr1	25534630	25535360	+	731	420	LAST	2	chr1	25535025	25535360	336	197	58.631	46.9048	99.5238	1	exonized	Helitron3Na_Mam	RC/Helitron	chr1	25535044	25535240	-	28.51	Ancient
XLOC_000100	linc-RHD-1	TCONS_00000168	lincRNA	chr1	25534630	25535360	+	731	420	LAST	2	chr1	25535025	25535360	336	114	33.9286	27.1429	99.5238	1	PolyA	L2a	LINE/L2	chr1	25535247	25535520	+	29.37	Ancient
XLOC_000101	linc-MAN1C1-1	TCONS_00000169	lincRNA	chr1	25907969	25916847	+	8879	483	LAST	2	chr1	25916660	25916847	188	16	8.51064	3.31263	3.31263	2	SPL	MLT2B2	LTR/ERVL	chr1	25916609	25916675	+	18.93	Ancient
XLOC_000101	linc-MAN1C1-1	TCONS_00000868	lincRNA	chr1	25911767	25916875	+	5109	233	LAST	2	chr1	25916660	25916875	216	20	9.25926	8.58369	22.7468	2	PolyA	L2a	LINE/L2	chr1	25916856	25916923	+	29.37	Ancient
XLOC_000101	linc-MAN1C1-1	TCONS_00000868	lincRNA	chr1	25911767	25916875	+	5109	233	FIRST	1	chr1	25911767	25911783	17	17	100	7.29614	22.7468	2	TSS_SPL	MIRb	SINE/MIR	chr1	25911659	25911804	-	29.76	Ancient
XLOC_000101	linc-MAN1C1-1	TCONS_00000868	lincRNA	chr1	25911767	25916875	+	5109	233	LAST	2	chr1	25916660	25916875	216	16	7.40741	6.86695	22.7468	2	SPL	MLT2B2	LTR/ERVL	chr1	25916609	25916675	+	18.93	Ancient
XLOC_000102	linc-PDIK1L-2	TCONS_00001962	lincRNA	chr1	26373156	26375590	+	2435	941	LAST	2	chr1	26375135	26375590	456	273	59.8684	29.0117	29.0117	1	PolyA	L1ME3B	LINE/L1	chr1	26375318	26375601	+	26.4	Ancient
XLOC_000104	linc-NUDC-1	TCONS_00000170	lincRNA	chr1	27202624	27204736	+	2113	306	LAST	2	chr1	27204609	27204736	128	29	22.6562	9.47712	41.5033	1	PolyA	MER113	DNA/hAT-Charlie	chr1	27204708	27204783	-	25.16	Ancient
XLOC_000104	linc-NUDC-1	TCONS_00000170	lincRNA	chr1	27202624	27204736	+	2113	306	FIRST	1	chr1	27202624	27202801	178	98	55.0562	32.0261	41.5033	1	SPL	AluSq2	SINE/Alu	chr1	27202704	27203008	-	10.62	LineageSpe
XLOC_000105	linc-WDTC1-1	TCONS_00000869	lincRNA	chr1	27364505	27384987	+	20483	220	MIDDLE	2	chr1	27371709	27371806	98	38	38.7755	17.2727	17.2727	2	SPL	MIRc	SINE/MIR	chr1	27371692	27371746	-	29.57	Ancient
XLOC_000105	linc-WDTC1-1	TCONS_00000870	lincRNA	chr1	27384984	27391197	+	6214	4723	LAST	2	chr1	27386505	27391197	4693	52	1.10803	1.101	76.4556	2	exonized	MIRb	SINE/MIR	chr1	27389358	27389409	-	29.76	Ancient
XLOC_000105	linc-WDTC1-1	TCONS_00000870	lincRNA	chr1	27384984	27391197	+	6214	4723	LAST	2	chr1	27386505	27391197	4693	22	0.468783	0.465806	76.4556	2	exonized	L2	LINE/L2	chr1	27388259	27388280	-	32.38	Ancient
XLOC_000105	linc-WDTC1-1	TCONS_00000870	lincRNA	chr1	27384984	27391197	+	6214	4723	LAST	2	chr1	27386505	27391197	4693	52	1.10803	1.101	76.4556	2	exonized	MIR	SINE/MIR	chr1	27389306	27389357	-	27.84	Ancient
XLOC_000105	linc-WDTC1-1	TCONS_00000870	lincRNA	chr1	27384984	27391197	+	6214	4723	LAST	2	chr1	27386505	27391197	4693	96	2.0456	2.03261	76.4556	2	exonized	L2	LINE/L2	chr1	27387867	27387962	-	32.38	Ancient
XLOC_000105	linc-WDTC1-1	TCONS_00000870	lincRNA	chr1	27384984	27391197	+	6214	4723	LAST	2	chr1	27386505	27391197	4693	296	6.30727	6.2672	76.4556	2	exonized	AluJo	SINE/Alu	chr1	27387963	27388258	-	16.42	LineageSpe
XLOC_000105	linc-WDTC1-1	TCONS_00000870	lincRNA	chr1	27384984	27391197	+	6214	4723	LAST	2	chr1	27386505	27391197	4693	169	3.60111	3.57823	76.4556	2	exonized	AluY	SINE/Alu	chr1	27387219	27387387	-	6.92	LineageSpe
XLOC_000105	linc-WDTC1-1	TCONS_00000870	lincRNA	chr1	27384984	27391197	+	6214	4723	LAST	2	chr1	27386505	27391197	4693	142	3.02578	3.00656	76.4556	2	exonized	AluY	SINE/Alu	chr1	27386621	27386762	-	6.92	LineageSpe
XLOC_000105	linc-WDTC1-1	TCONS_00000870	lincRNA	chr1	27384984	27391197	+	6214	4723	LAST	2	chr1	27386505	27391197	4693	456	9.7166	9.65488	76.4556	2	exonized	LTR2	LTR/ERV1	chr1	27386763	27387218	+	8.54	LineageSpe
XLOC_000105	linc-WDTC1-1	TCONS_00000870	lincRNA	chr1	27384984	27391197	+	6214	4723	LAST	2	chr1	27386505	27391197	4693	294	6.26465	6.22486	76.4556	2	exonized	AluSx1	SINE/Alu	chr1	27389631	27389924	+	11.14	LineageSpe
XLOC_000105	linc-WDTC1-1	TCONS_00000870	lincRNA	chr1	27384984	27391197	+	6214	4723	LAST	2	chr1	27386505	27391197	4693	290	6.17942	6.14017	76.4556	2	exonized	AluSq2	SINE/Alu	chr1	27388881	27389170	-	10.62	LineageSpe
XLOC_000105	linc-WDTC1-1	TCONS_00000870	lincRNA	chr1	27384984	27391197	+	6214	4723	LAST	2	chr1	27386505	27391197	4693	315	6.71212	6.66949	76.4556	2	exonized	AluSz	SINE/Alu	chr1	27388488	27388802	-	12.11	LineageSpe
XLOC_000105	linc-WDTC1-1	TCONS_00000870	lincRNA	chr1	27384984	27391197	+	6214	4723	LAST	2	chr1	27386505	27391197	4693	212	4.51737	4.48867	76.4556	2	exonized	MIR	SINE/MIR	chr1	27387650	27387861	-	27.84	Ancient
XLOC_000105	linc-WDTC1-1	TCONS_00000870	lincRNA	chr1	27384984	27391197	+	6214	4723	LAST	2	chr1	27386505	27391197	4693	800	17.0467	16.9384	76.4556	2	exonized	SVA_E	Other	chr1	27389965	27390764	+	5.27	LineageSpe
XLOC_000105	linc-WDTC1-1	TCONS_00000870	lincRNA	chr1	27384984	27391197	+	6214	4723	LAST	2	chr1	27386505	27391197	4693	415	8.84296	8.78679	76.4556	2	PolyA	SVA_E	Other	chr1	27390783	27392050	+	5.27	LineageSpe
XLOC_000107	linc-FAM76A-2	TCONS_00000171	lincRNA	chr1	27852316	27857072	+	4757	283	LAST	2	chr1	27856871	27857072	202	65	32.1782	22.9682	61.1307	1	SPL	AluSx3	SINE/Alu	chr1	27856766	27856935	-	11.23	LineageSpe
XLOC_000107	linc-FAM76A-2	TCONS_00000171	lincRNA	chr1	27852316	27857072	+	4757	283	LAST	2	chr1	27856871	27857072	202	108	53.4653	38.1625	61.1307	1	PolyA	MIR	SINE/MIR	chr1	27856965	27857214	+	27.84	Ancient
XLOC_000110	linc-EPB41-1	TCONS_00000174	lincRNA	chr1	29194087	29197779	+	3693	1746	LAST	2	chr1	29197025	29197779	755	30	3.97351	1.71821	44.8454	1	SPL	AluSz	SINE/Alu	chr1	29196752	29197054	-	12.11	LineageSpe
XLOC_000110	linc-EPB41-1	TCONS_00000174	lincRNA	chr1	29194087	29197779	+	3693	1746	FIRST	1	chr1	29194087	29195077	991	73	7.3663	4.18099	44.8454	1	exonized	MIRb	SINE/MIR	chr1	29194928	29195000	+	29.76	Ancient
XLOC_000110	linc-EPB41-1	TCONS_00000174	lincRNA	chr1	29194087	29197779	+	3693	1746	FIRST	1	chr1	29194087	29195077	991	120	12.109	6.87285	44.8454	1	exonized	MIR3	SINE/MIR	chr1	29194691	29194810	+	29.77	Ancient
XLOC_000110	linc-EPB41-1	TCONS_00000174	lincRNA	chr1	29194087	29197779	+	3693	1746	FIRST	1	chr1	29194087	29195077	991	38	3.83451	2.1764	44.8454	1	exonized	MIR3	SINE/MIR	chr1	29194212	29194249	+	29.77	Ancient
XLOC_000110	linc-EPB41-1	TCONS_00000174	lincRNA	chr1	29194087	29197779	+	3693	1746	LAST	2	chr1	29197025	29197779	755	139	18.4106	7.96105	44.8454	1	exonized	MIR3	SINE/MIR	chr1	29197363	29197501	+	29.77	Ancient
XLOC_000110	linc-EPB41-1	TCONS_00000174	lincRNA	chr1	29194087	29197779	+	3693	1746	FIRST	1	chr1	29194087	29195077	991	125	12.6135	7.15922	44.8454	1	exonized	L2c	LINE/L2	chr1	29194482	29194606	-	32.46	Ancient
XLOC_000110	linc-EPB41-1	TCONS_00000174	lincRNA	chr1	29194087	29197779	+	3693	1746	FIRST	1	chr1	29194087	29195077	991	73	7.3663	4.18099	44.8454	1	exonized	MIRb	SINE/MIR	chr1	29194837	29194909	+	29.76	Ancient
XLOC_000110	linc-EPB41-1	TCONS_00000174	lincRNA	chr1	29194087	29197779	+	3693	1746	FIRST	1	chr1	29194087	29195077	991	66	6.65994	3.78007	44.8454	1	TSS	AluJb	SINE/Alu	chr1	29194017	29194152	-	16.49	LineageSpe
XLOC_000110	linc-EPB41-1	TCONS_00000174	lincRNA	chr1	29194087	29197779	+	3693	1746	FIRST	1	chr1	29194087	29195077	991	119	12.0081	6.81558	44.8454	1	exonized	MIRb	SINE/MIR	chr1	29194216	29194334	+	29.76	Ancient
XLOC_000111	linc-PTPRU-2	TCONS_00000873	lincRNA	chr1	29459862	29461446	+	1585	1166	LAST	2	chr1	29461193	29461446	254	145	57.0866	12.4357	30.446	2	exonized	MIRc	SINE/MIR	chr1	29461220	29461364	-	29.57	Ancient
XLOC_000111	linc-PTPRU-2	TCONS_00000873	lincRNA	chr1	29459862	29461446	+	1585	1166	FIRST	1	chr1	29459862	29460773	912	210	23.0263	18.0103	30.446	2	TSS	AluSx3	SINE/Alu	chr1	29459762	29460071	+	11.23	LineageSpe
XLOC_000114	linc-ZCCHC17-9	TCONS_00000876	lincRNA	chr1	30159178	30161573	+	2396	388	LAST	2	chr1	30161236	30161573	338	338	100	87.1134	87.1134	1	PolyA_SPL	L1MCc	LINE/L1	chr1	30161220	30161625	+	27.78	Ancient
XLOC_000115	linc-ZCCHC17-8	TCONS_00000877	lincRNA	chr1	30184549	30185414	+	866	758	LAST	2	chr1	30184757	30185414	658	250	37.9939	32.9815	46.1741	1	exonized	MIRb	SINE/MIR	chr1	30185135	30185384	-	29.76	Ancient
XLOC_000115	linc-ZCCHC17-8	TCONS_00000877	lincRNA	chr1	30184549	30185414	+	866	758	FIRST	1	chr1	30184549	30184648	100	100	100	13.1926	46.1741	1	TSS_SPL	MIRb	SINE/MIR	chr1	30184504	30184737	-	29.76	Ancient
XLOC_000117	linc-ZCCHC17-6	TCONS_00000175	lincRNA	chr1	30613110	30614454	+	1345	551	LAST	2	chr1	30613982	30614454	473	473	100	85.8439	88.2033	1	PolyA_SPL	LTR31	LTR/ERV1	chr1	30613934	30614517	+	19.86	Ancient
XLOC_000117	linc-ZCCHC17-6	TCONS_00000175	lincRNA	chr1	30613110	30614454	+	1345	551	FIRST	1	chr1	30613110	30613187	78	13	16.6667	2.35935	88.2033	1	TSS	Arthur1B	DNA/hAT-Tip100	chr1	30613009	30613122	-	25.55	Ancient
XLOC_000118	linc-ZCCHC17-5	TCONS_00000879	lincRNA	chr1	30726193	30734008	+	7816	2983	LAST	3	chr1	30731265	30734008	2744	47	1.71283	1.5756	45.6923	1	exonized	MIRc	SINE/MIR	chr1	30731802	30731848	+	29.57	Ancient
XLOC_000118	linc-ZCCHC17-5	TCONS_00000879	lincRNA	chr1	30726193	30734008	+	7816	2983	FIRST	1	chr1	30726193	30726311	119	112	94.1176	3.75461	45.6923	1	TSS	AluJb	SINE/Alu	chr1	30725989	30726304	-	16.49	LineageSpe
XLOC_000118	linc-ZCCHC17-5	TCONS_00000879	lincRNA	chr1	30726193	30734008	+	7816	2983	LAST	3	chr1	30731265	30734008	2744	299	10.8965	10.0235	45.6923	1	exonized	AluSz	SINE/Alu	chr1	30732868	30733166	+	12.11	LineageSpe
XLOC_000118	linc-ZCCHC17-5	TCONS_00000879	lincRNA	chr1	30726193	30734008	+	7816	2983	LAST	3	chr1	30731265	30734008	2744	268	9.76676	8.98424	45.6923	1	SPL	MLT1L	LTR/ERVL-MaLR	chr1	30730981	30731532	+	28.7	Ancient
XLOC_000118	linc-ZCCHC17-5	TCONS_00000879	lincRNA	chr1	30726193	30734008	+	7816	2983	MIDDLE	2	chr1	30728826	30728945	120	111	92.5	3.72109	45.6923	1	SPL	MIR	SINE/MIR	chr1	30728691	30728936	-	27.84	Ancient
XLOC_000118	linc-ZCCHC17-5	TCONS_00000879	lincRNA	chr1	30726193	30734008	+	7816	2983	LAST	3	chr1	30731265	30734008	2744	54	1.96793	1.81026	45.6923	1	exonized	MIR	SINE/MIR	chr1	30733483	30733536	+	27.84	Ancient
XLOC_000118	linc-ZCCHC17-5	TCONS_00000879	lincRNA	chr1	30726193	30734008	+	7816	2983	LAST	3	chr1	30731265	30734008	2744	472	17.2012	15.823	45.6923	1	PolyA	LTR38	LTR/ERV1	chr1	30733537	30734095	+	22.03	LineageSpe
XLOC_000119	linc-ZCCHC17-4	TCONS_00000176	lincRNA	chr1	30888672	30893955	+	5284	481	FIRST	1	chr1	30888672	30888720	49	12	24.4898	2.4948	33.4719	1	SPL	MIRb	SINE/MIR	chr1	30888709	30888873	+	29.76	Ancient
XLOC_000119	linc-ZCCHC17-4	TCONS_00000176	lincRNA	chr1	30888672	30893955	+	5284	481	FIRST	1	chr1	30888672	30888720	49	16	32.6531	3.3264	33.4719	1	TSS	MIR	SINE/MIR	chr1	30888586	30888687	+	27.84	Ancient
XLOC_000119	linc-ZCCHC17-4	TCONS_00000176	lincRNA	chr1	30888672	30893955	+	5284	481	LAST	3	chr1	30893631	30893955	325	112	34.4615	23.2848	33.4719	1	exonized	MIRb	SINE/MIR	chr1	30893809	30893920	+	29.76	Ancient
XLOC_000119	linc-ZCCHC17-4	TCONS_00000176	lincRNA	chr1	30888672	30893955	+	5284	481	MIDDLE	2	chr1	30889694	30889800	107	21	19.6262	4.3659	33.4719	1	SPL	MIRb	SINE/MIR	chr1	30889780	30889915	-	29.76	Ancient
XLOC_000122	linc-ZCCHC17-1	TCONS_00000881	lincRNA	chr1	31333755	31335492	+	1738	321	LAST	2	chr1	31335208	31335492	285	285	100	88.785	88.785	2	PolyA_SPL	Tigger3b	DNA/TcMar-Tigger	chr1	31335104	31335520	+	14.29	LineageSpe
XLOC_000122	linc-ZCCHC17-1	TCONS_00001972	lincRNA	chr1	31333698	31334455	+	758	656	LAST	2	chr1	31333893	31334455	563	74	13.1439	11.2805	37.9573	2	exonized	L2c	LINE/L2	chr1	31334280	31334353	-	32.46	Ancient
XLOC_000122	linc-ZCCHC17-1	TCONS_00001972	lincRNA	chr1	31333698	31334455	+	758	656	LAST	2	chr1	31333893	31334455	563	53	9.41385	8.07927	37.9573	2	PolyA	MIR	SINE/MIR	chr1	31334403	31334511	+	27.84	Ancient
XLOC_000122	linc-ZCCHC17-1	TCONS_00001972	lincRNA	chr1	31333698	31334455	+	758	656	LAST	2	chr1	31333893	31334455	563	122	21.6696	18.5976	37.9573	2	SPL	MIR	SINE/MIR	chr1	31333787	31334014	-	27.84	Ancient
XLOC_000123	linc-TINAGL1-1	TCONS_00000005	lincRNA	chr1	31984036	31989846	+	5811	2741	FIRST	1	chr1	31984036	31984437	402	47	11.6915	1.7147	32.6158	2	TSS	HERVL-int	LTR/ERVL	chr1	31983446	31984082	+	9.12	LineageSpe
XLOC_000123	linc-TINAGL1-1	TCONS_00000005	lincRNA	chr1	31984036	31989846	+	5811	2741	LAST	3	chr1	31987626	31989846	2221	81	3.64701	2.95513	32.6158	2	exonized	MIRb	SINE/MIR	chr1	31988887	31988967	+	29.76	Ancient
XLOC_000123	linc-TINAGL1-1	TCONS_00000005	lincRNA	chr1	31984036	31989846	+	5811	2741	LAST	3	chr1	31987626	31989846	2221	69	3.10671	2.51733	32.6158	2	exonized	MIRb	SINE/MIR	chr1	31989267	31989335	+	29.76	Ancient
XLOC_000123	linc-TINAGL1-1	TCONS_00000005	lincRNA	chr1	31984036	31989846	+	5811	2741	LAST	3	chr1	31987626	31989846	2221	299	13.4624	10.9084	32.6158	2	exonized	AluSx	SINE/Alu	chr1	31988968	31989266	-	11.66	LineageSpe
XLOC_000123	linc-TINAGL1-1	TCONS_00000005	lincRNA	chr1	31984036	31989846	+	5811	2741	LAST	3	chr1	31987626	31989846	2221	47	2.11616	1.7147	32.6158	2	exonized	MIR	SINE/MIR	chr1	31989612	31989658	+	27.84	Ancient
XLOC_000123	linc-TINAGL1-1	TCONS_00000005	lincRNA	chr1	31984036	31989846	+	5811	2741	FIRST	1	chr1	31984036	31984437	402	351	87.3134	12.8055	32.6158	2	SPL	MLT2A1	LTR/ERVL	chr1	31984087	31984513	+	8.95	LineageSpe
XLOC_000123	linc-TINAGL1-1	TCONS_00000180	lincRNA	chr1	31987964	31989190	+	1227	1122	LAST	2	chr1	31988432	31989190	759	223	29.3808	19.8752	27.0945	2	PolyA	AluSx	SINE/Alu	chr1	31988968	31989266	-	11.66	LineageSpe
XLOC_000123	linc-TINAGL1-1	TCONS_00000180	lincRNA	chr1	31987964	31989190	+	1227	1122	LAST	2	chr1	31988432	31989190	759	81	10.6719	7.21925	27.0945	2	exonized	MIRb	SINE/MIR	chr1	31988887	31988967	+	29.76	Ancient
XLOC_000129	linc-TSSK3-2	TCONS_00000884	lincRNA	chr1	32813111	32814381	+	1271	406	LAST	2	chr1	32814007	32814381	375	26	6.93333	6.40394	6.40394	1	PolyA	MIR	SINE/MIR	chr1	32814356	32814579	+	27.84	Ancient
XLOC_000133	linc-ADC-1	TCONS_00001982	lincRNA	chr1	33394669	33399878	+	5210	1113	FIRST	1	chr1	33394669	33395658	990	373	37.6768	33.513	86.9721	1	exonized	ERVL-E-int	LTR/ERVL	chr1	33395047	33395419	-	30.69	Ancient
XLOC_000133	linc-ADC-1	TCONS_00001982	lincRNA	chr1	33394669	33399878	+	5210	1113	FIRST	1	chr1	33394669	33395658	990	217	21.9192	19.4969	86.9721	1	SPL	ERVL-E-int	LTR/ERVL	chr1	33395442	33395711	-	30.69	Ancient
XLOC_000133	linc-ADC-1	TCONS_00001982	lincRNA	chr1	33394669	33399878	+	5210	1113	FIRST	1	chr1	33394669	33395658	990	378	38.1818	33.9623	86.9721	1	TSS	MLT1C	LTR/ERVL-MaLR	chr1	33394591	33395046	-	21.68	Ancient
XLOC_000141	linc-ZC3H12A-4	TCONS_00000890	lincRNA	chr1	36916215	36917200	+	986	640	LAST	2	chr1	36916578	36917200	623	309	49.5987	48.2812	48.2812	1	exonized	AluSq2	SINE/Alu	chr1	36916772	36917080	-	10.62	LineageSpe
XLOC_000144	linc-ZC3H12A-1	TCONS_00000185	lincRNA	chr1	37238741	37241369	+	2629	463	FIRST	1	chr1	37238741	37238914	174	93	53.4483	20.0864	31.7495	2	SPL	MLT1A0	LTR/ERVL-MaLR	chr1	37238822	37239049	-	19.59	Ancient
XLOC_000144	linc-ZC3H12A-1	TCONS_00000185	lincRNA	chr1	37238741	37241369	+	2629	463	FIRST	1	chr1	37238741	37238914	174	54	31.0345	11.6631	31.7495	2	TSS	MLT1I	LTR/ERVL-MaLR	chr1	37238555	37238794	+	29.11	Ancient
XLOC_000144	linc-ZC3H12A-1	TCONS_00000891	lincRNA	chr1	37235456	37238931	+	3476	236	FIRST	1	chr1	37235456	37235495	40	40	100	16.9492	88.5593	2	TSS_SPL	MIRb	SINE/MIR	chr1	37235430	37235535	+	29.76	Ancient
XLOC_000144	linc-ZC3H12A-1	TCONS_00000891	lincRNA	chr1	37235456	37238931	+	3476	236	LAST	2	chr1	37238736	37238931	196	110	56.1224	46.6102	88.5593	2	PolyA	MLT1A0	LTR/ERVL-MaLR	chr1	37238822	37239049	-	19.59	Ancient
XLOC_000144	linc-ZC3H12A-1	TCONS_00000891	lincRNA	chr1	37235456	37238931	+	3476	236	LAST	2	chr1	37238736	37238931	196	59	30.102	25	88.5593	2	SPL	MLT1I	LTR/ERVL-MaLR	chr1	37238555	37238794	+	29.11	Ancient
XLOC_000147	linc-AKIRIN1-4	TCONS_00000894	lincRNA	chr1	38607365	38628221	+	20857	424	LAST	3	chr1	38627951	38628221	271	59	21.7712	13.9151	43.8679	2	SPL	MIR3	SINE/MIR	chr1	38627876	38628009	+	29.77	Ancient
XLOC_000147	linc-AKIRIN1-4	TCONS_00000894	lincRNA	chr1	38607365	38628221	+	20857	424	FIRST	1	chr1	38607365	38607386	22	22	100	5.18868	43.8679	2	TSS_SPL	LTR16	LTR/ERVL	chr1	38607194	38607605	-	27.41	LineageSpe
XLOC_000147	linc-AKIRIN1-4	TCONS_00000894	lincRNA	chr1	38607365	38628221	+	20857	424	MIDDLE	2	chr1	38627365	38627495	131	105	80.1527	24.7642	43.8679	2	SPL	MIRc	SINE/MIR	chr1	38627327	38627469	-	29.57	Ancient
XLOC_000147	linc-AKIRIN1-4	TCONS_00001987	lincRNA	chr1	38627360	38628183	+	824	369	LAST	2	chr1	38627951	38628183	233	59	25.3219	15.9892	45.7995	2	SPL	MIR3	SINE/MIR	chr1	38627876	38628009	+	29.77	Ancient
XLOC_000147	linc-AKIRIN1-4	TCONS_00001987	lincRNA	chr1	38627360	38628183	+	824	369	FIRST	1	chr1	38627360	38627495	136	110	80.8824	29.8103	45.7995	2	TSS	MIRc	SINE/MIR	chr1	38627327	38627469	-	29.57	Ancient
XLOC_000148	linc-AKIRIN1-3	TCONS_00000895	lincRNA	chr1	38658716	38676024	+	17309	591	LAST	3	chr1	38675675	38676024	350	88	25.1429	14.89	31.3029	1	SPL	MIR3	SINE/MIR	chr1	38675607	38675762	-	29.77	Ancient
XLOC_000148	linc-AKIRIN1-3	TCONS_00000895	lincRNA	chr1	38658716	38676024	+	17309	591	MIDDLE	2	chr1	38674943	38675138	196	66	33.6735	11.1675	31.3029	1	exonized	MIR	SINE/MIR	chr1	38674976	38675041	-	27.84	Ancient
XLOC_000148	linc-AKIRIN1-3	TCONS_00000895	lincRNA	chr1	38658716	38676024	+	17309	591	MIDDLE	2	chr1	38674943	38675138	196	31	15.8163	5.24535	31.3029	1	SPL	LTR16C	LTR/ERVL	chr1	38674785	38674973	+	28.16	Ancient
XLOC_000149	linc-AKIRIN1-2	TCONS_00000896	lincRNA	chr1	38677715	38679106	+	1392	891	LAST	2	chr1	38678681	38679106	426	110	25.8216	12.3457	50.954	1	SPL	MIR	SINE/MIR	chr1	38678574	38678790	-	27.84	Ancient
XLOC_000149	linc-AKIRIN1-2	TCONS_00000896	lincRNA	chr1	38677715	38679106	+	1392	891	FIRST	1	chr1	38677715	38678179	465	110	23.6559	12.3457	50.954	1	SPL	L2c	LINE/L2	chr1	38678070	38678283	-	32.46	Ancient
XLOC_000149	linc-AKIRIN1-2	TCONS_00000896	lincRNA	chr1	38677715	38679106	+	1392	891	FIRST	1	chr1	38677715	38678179	465	234	50.3226	26.2626	50.954	1	TSS	L2a	LINE/L2	chr1	38676855	38677948	+	29.37	Ancient
XLOC_000152	linc-MACF1-2	TCONS_00001989	lincRNA	chr1	39508264	39509883	+	1620	285	LAST	2	chr1	39509846	39509883	38	38	100	13.3333	28.0702	1	PolyA_SPL	AluSx	SINE/Alu	chr1	39509804	39509906	-	11.66	LineageSpe
XLOC_000152	linc-MACF1-2	TCONS_00001989	lincRNA	chr1	39508264	39509883	+	1620	285	FIRST	1	chr1	39508264	39508510	247	42	17.004	14.7368	28.0702	1	TSS	L1MA8	LINE/L1	chr1	39508185	39508305	-	17.09	Ancient
XLOC_000153	linc-MACF1-1	TCONS_00001990	lincRNA	chr1	39512712	39514128	+	1417	726	LAST	2	chr1	39513563	39514128	566	135	23.8516	18.595	67.2176	1	exonized	AluJb	SINE/Alu	chr1	39513833	39513967	-	16.49	LineageSpe
XLOC_000153	linc-MACF1-1	TCONS_00001990	lincRNA	chr1	39512712	39514128	+	1417	726	LAST	2	chr1	39513563	39514128	566	161	28.4452	22.1763	67.2176	1	PolyA	AluY	SINE/Alu	chr1	39513968	39514267	-	6.92	LineageSpe
XLOC_000153	linc-MACF1-1	TCONS_00001990	lincRNA	chr1	39512712	39514128	+	1417	726	LAST	2	chr1	39513563	39514128	566	192	33.9223	26.4463	67.2176	1	exonized	MER102c	DNA/hAT-Charlie	chr1	39513636	39513827	-	28.32	Ancient
XLOC_000155	linc-MFSD2A-1	TCONS_00000911	lincRNA	chr1	40289924	40303684	+	13761	545	LAST	4	chr1	40303549	40303684	136	136	100	24.9541	44.2202	2	PolyA_SPL	MLT1J2	LTR/ERVL-MaLR	chr1	40303339	40303815	+	28.4	Ancient
XLOC_000155	linc-MFSD2A-1	TCONS_00000911	lincRNA	chr1	40289924	40303684	+	13761	545	FIRST	1	chr1	40289924	40290104	181	105	58.011	19.2661	44.2202	2	SPL	L2c	LINE/L2	chr1	40290000	40290109	-	32.46	Ancient
XLOC_000155	linc-MFSD2A-1	TCONS_00001992	lincRNA	chr1	40290938	40303684	+	12747	661	LAST	3	chr1	40303549	40303684	136	136	100	20.5749	20.5749	2	PolyA_SPL	MLT1J2	LTR/ERVL-MaLR	chr1	40303339	40303815	+	28.4	Ancient
XLOC_000160	linc-GUCA2B-1	TCONS_00000918	lincRNA	chr1	41898931	41930507	+	31577	340	LAST	2	chr1	41930210	41930507	298	20	6.71141	5.88235	87.6471	1	SPL	LTR16C	LTR/ERVL	chr1	41929891	41930229	+	28.16	Ancient
XLOC_000160	linc-GUCA2B-1	TCONS_00000918	lincRNA	chr1	41898931	41930507	+	31577	340	LAST	2	chr1	41930210	41930507	298	278	93.2886	81.7647	87.6471	1	PolyA	MLT1B	LTR/ERVL-MaLR	chr1	41930230	41930630	+	18.85	Ancient
XLOC_000162	linc-FAM183A-1	TCONS_00000039	lincRNA	chr1	43585819	43611958	+	26140	1138	FIRST	1	chr1	43585819	43585943	125	125	100	10.9842	62.0387	2	TSS_SPL	L1PA2	LINE/L1	chr1	43580199	43586187	-	2.29	LineageSpe
XLOC_000162	linc-FAM183A-1	TCONS_00000039	lincRNA	chr1	43585819	43611958	+	26140	1138	LAST	3	chr1	43611117	43611958	842	466	55.3444	40.949	62.0387	2	exonized	L1M5	LINE/L1	chr1	43611338	43611803	+	28.23	Ancient
XLOC_000162	linc-FAM183A-1	TCONS_00000039	lincRNA	chr1	43585819	43611958	+	26140	1138	LAST	3	chr1	43611117	43611958	842	115	13.658	10.1054	62.0387	2	PolyA	MER33	DNA/hAT-Charlie	chr1	43611844	43612084	+	18.93	Ancient
XLOC_000166	linc-UROD-1	TCONS_00002016	lincRNA	chr1	45282505	45283445	+	941	883	LAST	2	chr1	45282569	45283445	877	90	10.2623	10.1925	76.4439	1	exonized	L1ME3G	LINE/L1	chr1	45282683	45282772	+	27.94	Ancient
XLOC_000166	linc-UROD-1	TCONS_00002016	lincRNA	chr1	45282505	45283445	+	941	883	LAST	2	chr1	45282569	45283445	877	222	25.3136	25.1416	76.4439	1	exonized	MIR	SINE/MIR	chr1	45282863	45283084	+	27.84	Ancient
XLOC_000166	linc-UROD-1	TCONS_00002016	lincRNA	chr1	45282505	45283445	+	941	883	LAST	2	chr1	45282569	45283445	877	29	3.30673	3.28426	76.4439	1	PolyA	L2a	LINE/L2	chr1	45283417	45283483	-	29.37	Ancient
XLOC_000166	linc-UROD-1	TCONS_00002016	lincRNA	chr1	45282505	45283445	+	941	883	LAST	2	chr1	45282569	45283445	877	334	38.0844	37.8256	76.4439	1	exonized	L2a	LINE/L2	chr1	45283099	45283432	-	29.37	Ancient
XLOC_000167	linc-HPDL-1	TCONS_00002017	lincRNA	chr1	45672404	45683543	+	11140	320	LAST	2	chr1	45683510	45683543	34	20	58.8235	6.25	6.25	1	SPL	Plat_L3	LINE/CR1	chr1	45683478	45683529	+	31.39	Ancient
XLOC_000169	linc-RAD54L-1	TCONS_00000926	lincRNA	chr1	46702304	46705490	+	3187	321	LAST	2	chr1	46705450	46705490	41	40	97.561	12.4611	99.6885	1	PolyA	MLT1D	LTR/ERVL-MaLR	chr1	46705451	46705550	-	21.73	Ancient
XLOC_000169	linc-RAD54L-1	TCONS_00000926	lincRNA	chr1	46702304	46705490	+	3187	321	FIRST	1	chr1	46702304	46702583	280	74	26.4286	23.053	99.6885	1	TSS	AluJb	SINE/Alu	chr1	46702081	46702377	-	16.49	LineageSpe
XLOC_000169	linc-RAD54L-1	TCONS_00000926	lincRNA	chr1	46702304	46705490	+	3187	321	FIRST	1	chr1	46702304	46702583	280	206	73.5714	64.1745	99.6885	1	SPL	L1M5	LINE/L1	chr1	46702378	46702667	-	28.23	Ancient
XLOC_000170	linc-DMBX1-1	TCONS_00000191	lincRNA	chr1	46921495	46948147	+	26653	354	LAST	2	chr1	46947882	46948147	266	266	100	75.1412	75.1412	1	PolyA_SPL	MLT1F1	LTR/ERVL-MaLR	chr1	46947631	46948205	+	22.79	Ancient
XLOC_000173	linc-CYP4B1-1	TCONS_00000192	lincRNA	chr1	47223947	47233300	+	9354	488	LAST	4	chr1	47233197	47233300	104	55	52.8846	11.2705	69.2623	1	PolyA	MIR3	SINE/MIR	chr1	47233246	47233354	-	29.77	Ancient
XLOC_000173	linc-CYP4B1-1	TCONS_00000192	lincRNA	chr1	47223947	47233300	+	9354	488	MIDDLE	3	chr1	47231357	47231515	159	159	100	32.582	69.2623	1	Both_SPL	L1ME3Cz	LINE/L1	chr1	47230929	47232429	-	26.99	Ancient
XLOC_000173	linc-CYP4B1-1	TCONS_00000192	lincRNA	chr1	47223947	47233300	+	9354	488	MIDDLE	2	chr1	47230650	47230773	124	124	100	25.4098	69.2623	1	Both_SPL	AluSq	SINE/Alu	chr1	47230626	47230928	-	10.52	LineageSpe
XLOC_000175	linc-CMPK1-3	TCONS_00000193	lincRNA	chr1	47644922	47645829	+	908	479	LAST	2	chr1	47645540	47645829	290	154	53.1034	32.1503	32.1503	3	SPL	MIRb	SINE/MIR	chr1	47645517	47645693	-	29.76	Ancient
XLOC_000175	linc-CMPK1-3	TCONS_00000929	lincRNA	chr1	47644290	47645982	+	1693	1267	LAST	2	chr1	47645537	47645982	446	157	35.2018	12.3915	29.6764	3	SPL	MIRb	SINE/MIR	chr1	47645517	47645693	-	29.76	Ancient
XLOC_000175	linc-CMPK1-3	TCONS_00000929	lincRNA	chr1	47644290	47645982	+	1693	1267	FIRST	1	chr1	47644290	47645110	821	98	11.9367	7.73481	29.6764	3	TSS	MIR	SINE/MIR	chr1	47644160	47644387	-	27.84	Ancient
XLOC_000175	linc-CMPK1-3	TCONS_00000929	lincRNA	chr1	47644290	47645982	+	1693	1267	FIRST	1	chr1	47644290	47645110	821	121	14.7381	9.55012	29.6764	3	exonized	MER91A	DNA/hAT-Tip100	chr1	47644582	47644702	-	30.69	Ancient
XLOC_000175	linc-CMPK1-3	TCONS_00000930	lincRNA	chr1	47645094	47645573	+	480	279	LAST	2	chr1	47645540	47645573	34	34	100	12.1864	46.9534	3	PolyA_SPL	MIRb	SINE/MIR	chr1	47645517	47645693	-	29.76	Ancient
XLOC_000175	linc-CMPK1-3	TCONS_00000930	lincRNA	chr1	47645094	47645573	+	480	279	FIRST	1	chr1	47645094	47645338	245	97	39.5918	34.767	46.9534	3	exonized	L2c	LINE/L2	chr1	47645231	47645327	-	32.46	Ancient
XLOC_000179	linc-SLC5A9-4	TCONS_00000932	lincRNA	chr1	48226249	48231744	+	5496	1390	FIRST	1	chr1	48226249	48226932	684	93	13.5965	6.69065	6.69065	1	exonized	MIRc	SINE/MIR	chr1	48226789	48226881	-	29.57	Ancient
XLOC_000180	linc-SLC5A9-3	TCONS_00000195	lincRNA	chr1	48283738	48285909	+	2172	1807	LAST	2	chr1	48284253	48285909	1657	284	17.1394	15.7167	19.7012	1	PolyA	L2a	LINE/L2	chr1	48285626	48285912	+	29.37	Ancient
XLOC_000180	linc-SLC5A9-3	TCONS_00000195	lincRNA	chr1	48283738	48285909	+	2172	1807	LAST	2	chr1	48284253	48285909	1657	72	4.3452	3.9845	19.7012	1	exonized	L2b	LINE/L2	chr1	48285425	48285496	-	32.38	Ancient
XLOC_000181	linc-SLC5A9-2	TCONS_00000196	lincRNA	chr1	48519217	48522448	+	3232	513	LAST	4	chr1	48522322	48522448	127	39	30.7087	7.60234	31.1891	2	SPL	L2c	LINE/L2	chr1	48522290	48522360	+	32.46	Ancient
XLOC_000181	linc-SLC5A9-2	TCONS_00000196	lincRNA	chr1	48519217	48522448	+	3232	513	FIRST	1	chr1	48519217	48519419	203	121	59.6059	23.5867	31.1891	2	TSS	L3	LINE/CR1	chr1	48519100	48519337	-	32.5	Ancient
XLOC_000181	linc-SLC5A9-2	TCONS_00000197	lincRNA	chr1	48519881	48532873	+	12993	789	LAST	3	chr1	48532270	48532873	604	186	30.7947	23.5741	23.5741	2	exonized	MIRc	SINE/MIR	chr1	48532298	48532483	+	29.57	Ancient
XLOC_000182	linc-SLC5A9-1	TCONS_00000198	lincRNA	chr1	48671637	48672515	+	879	270	LAST	3	chr1	48672482	48672515	34	34	100	12.5926	44.4444	1	PolyA_SPL	L1MA9	LINE/L1	chr1	48672473	48672761	-	18.85	Ancient
XLOC_000182	linc-SLC5A9-1	TCONS_00000198	lincRNA	chr1	48671637	48672515	+	879	270	MIDDLE	2	chr1	48671818	48671966	149	86	57.7181	31.8519	44.4444	1	SPL	MIRb	SINE/MIR	chr1	48671881	48672101	-	29.76	Ancient
XLOC_000184	linc-CDKN2C-5	TCONS_00000933	lincRNA	chr1	50723329	50723876	+	548	314	FIRST	1	chr1	50723329	50723358	30	30	100	9.55414	9.55414	1	TSS_SPL	L2c	LINE/L2	chr1	50723125	50723567	-	32.46	Ancient
XLOC_000185	linc-CDKN2C-4	TCONS_00000934	lincRNA	chr1	50772147	50773062	+	916	422	LAST	2	chr1	50772954	50773062	109	109	100	25.8294	25.8294	1	PolyA_SPL	MIRc	SINE/MIR	chr1	50772890	50773137	-	29.57	Ancient
XLOC_000186	linc-CDKN2C-3	TCONS_00000935	lincRNA	chr1	50786946	50790716	+	3771	312	LAST	2	chr1	50790603	50790716	114	114	100	36.5385	36.5385	1	PolyA_SPL	Charlie1b	DNA/hAT-Charlie	chr1	50790483	50790924	+	20.18	Ancient
XLOC_000190	linc-C1orf185-1	TCONS_00000937	lincRNA	chr1	51443233	51479174	+	35942	4535	LAST	3	chr1	51475180	51479174	3995	83	2.0776	1.83021	87.3649	2	exonized	MER47A	DNA/TcMar-Tigger	chr1	51478642	51478724	+	16.09	Ancient
XLOC_000190	linc-C1orf185-1	TCONS_00000937	lincRNA	chr1	51443233	51479174	+	35942	4535	MIDDLE	2	chr1	51467141	51467241	101	101	100	2.22712	87.3649	2	Both_SPL	AluJb	SINE/Alu	chr1	51467097	51467388	-	16.49	LineageSpe
XLOC_000190	linc-C1orf185-1	TCONS_00000937	lincRNA	chr1	51443233	51479174	+	35942	4535	LAST	3	chr1	51475180	51479174	3995	292	7.30914	6.43881	87.3649	2	exonized	AluJb	SINE/Alu	chr1	51476632	51476923	+	16.49	LineageSpe
XLOC_000190	linc-C1orf185-1	TCONS_00000937	lincRNA	chr1	51443233	51479174	+	35942	4535	LAST	3	chr1	51475180	51479174	3995	31	0.77597	0.683572	87.3649	2	exonized	MER47A	DNA/TcMar-Tigger	chr1	51478321	51478351	+	16.09	Ancient
XLOC_000190	linc-C1orf185-1	TCONS_00000937	lincRNA	chr1	51443233	51479174	+	35942	4535	LAST	3	chr1	51475180	51479174	3995	130	3.25407	2.86659	87.3649	2	exonized	L1ME3	LINE/L1	chr1	51478725	51478854	+	24.73	Ancient
XLOC_000190	linc-C1orf185-1	TCONS_00000937	lincRNA	chr1	51443233	51479174	+	35942	4535	LAST	3	chr1	51475180	51479174	3995	251	6.28285	5.53473	87.3649	2	PolyA	MER33	DNA/hAT-Charlie	chr1	51478924	51479232	+	18.93	Ancient
XLOC_000190	linc-C1orf185-1	TCONS_00000937	lincRNA	chr1	51443233	51479174	+	35942	4535	LAST	3	chr1	51475180	51479174	3995	298	7.45932	6.57111	87.3649	2	exonized	AluY	SINE/Alu	chr1	51478023	51478320	-	6.92	LineageSpe
XLOC_000190	linc-C1orf185-1	TCONS_00000937	lincRNA	chr1	51443233	51479174	+	35942	4535	LAST	3	chr1	51475180	51479174	3995	134	3.35419	2.9548	87.3649	2	exonized	AluSz6	SINE/Alu	chr1	51476090	51476223	-	13.16	LineageSpe
XLOC_000190	linc-C1orf185-1	TCONS_00000937	lincRNA	chr1	51443233	51479174	+	35942	4535	LAST	3	chr1	51475180	51479174	3995	223	5.58198	4.91731	87.3649	2	exonized	L1ME3	LINE/L1	chr1	51477518	51477740	+	24.73	Ancient
XLOC_000190	linc-C1orf185-1	TCONS_00000937	lincRNA	chr1	51443233	51479174	+	35942	4535	LAST	3	chr1	51475180	51479174	3995	282	7.05882	6.2183	87.3649	2	exonized	MER47A	DNA/TcMar-Tigger	chr1	51477741	51478022	+	16.09	Ancient
XLOC_000190	linc-C1orf185-1	TCONS_00000937	lincRNA	chr1	51443233	51479174	+	35942	4535	LAST	3	chr1	51475180	51479174	3995	290	7.25907	6.39471	87.3649	2	exonized	AluJb	SINE/Alu	chr1	51478352	51478641	-	16.49	LineageSpe
XLOC_000190	linc-C1orf185-1	TCONS_00000937	lincRNA	chr1	51443233	51479174	+	35942	4535	LAST	3	chr1	51475180	51479174	3995	298	7.45932	6.57111	87.3649	2	exonized	AluSz	SINE/Alu	chr1	51477220	51477517	+	12.11	LineageSpe
XLOC_000190	linc-C1orf185-1	TCONS_00000937	lincRNA	chr1	51443233	51479174	+	35942	4535	LAST	3	chr1	51475180	51479174	3995	296	7.40926	6.52701	87.3649	2	exonized	L1ME3	LINE/L1	chr1	51476924	51477219	+	24.73	Ancient
XLOC_000190	linc-C1orf185-1	TCONS_00000937	lincRNA	chr1	51443233	51479174	+	35942	4535	LAST	3	chr1	51475180	51479174	3995	903	22.6033	19.9118	87.3649	2	SPL	L1ME3	LINE/L1	chr1	51475052	51476082	+	24.73	Ancient
XLOC_000190	linc-C1orf185-1	TCONS_00000937	lincRNA	chr1	51443233	51479174	+	35942	4535	LAST	3	chr1	51475180	51479174	3995	350	8.76095	7.71775	87.3649	2	exonized	L1ME3	LINE/L1	chr1	51476282	51476631	+	24.73	Ancient
XLOC_000190	linc-C1orf185-1	TCONS_00000938	lincRNA	chr1	51443453	51475968	+	32516	1008	LAST	2	chr1	51475180	51475968	789	789	100	78.2738	78.2738	2	PolyA_SPL	L1ME3	LINE/L1	chr1	51475052	51476082	+	24.73	Ancient
XLOC_000191	linc-RNF11-1	TCONS_00000939	lincRNA	chr1	51617575	51621124	+	3550	2137	MIDDLE	2	chr1	51618830	51618908	79	79	100	3.69677	99.8128	1	Both_SPL	AluJo	SINE/Alu	chr1	51618644	51618930	-	16.42	LineageSpe
XLOC_000191	linc-RNF11-1	TCONS_00000939	lincRNA	chr1	51617575	51621124	+	3550	2137	FIRST	1	chr1	51617575	51617962	388	86	22.1649	4.02433	99.8128	1	TSS	AluSg7	SINE/Alu	chr1	51617349	51617660	-	9.04	LineageSpe
XLOC_000191	linc-RNF11-1	TCONS_00000939	lincRNA	chr1	51617575	51621124	+	3550	2137	FIRST	1	chr1	51617575	51617962	388	128	32.9897	5.98971	99.8128	1	exonized	FLAM_A	SINE/Alu	chr1	51617663	51617790	-	18.67	LineageSpe
XLOC_000191	linc-RNF11-1	TCONS_00000939	lincRNA	chr1	51617575	51621124	+	3550	2137	FIRST	1	chr1	51617575	51617962	388	170	43.8144	7.95508	99.8128	1	SPL	LTR33C	LTR/ERVL	chr1	51617793	51618124	-	27.36	Ancient
XLOC_000191	linc-RNF11-1	TCONS_00000939	lincRNA	chr1	51617575	51621124	+	3550	2137	LAST	3	chr1	51619455	51621124	1670	315	18.8623	14.7403	99.8128	1	exonized	AluSx	SINE/Alu	chr1	51620786	51621100	+	11.66	LineageSpe
XLOC_000191	linc-RNF11-1	TCONS_00000939	lincRNA	chr1	51617575	51621124	+	3550	2137	LAST	3	chr1	51619455	51621124	1670	24	1.43713	1.12307	99.8128	1	PolyA	L1MA9	LINE/L1	chr1	51621101	51621222	+	18.85	Ancient
XLOC_000191	linc-RNF11-1	TCONS_00000939	lincRNA	chr1	51617575	51621124	+	3550	2137	LAST	3	chr1	51619455	51621124	1670	1331	79.7006	62.2836	99.8128	1	SPL	L1MA9	LINE/L1	chr1	51618931	51620785	+	18.85	Ancient
XLOC_000194	linc-CPT2-1	TCONS_00000942	lincRNA	chr1	53656725	53657133	+	409	314	LAST	2	chr1	53656964	53657133	170	96	56.4706	30.5732	30.5732	1	PolyA	AluSx	SINE/Alu	chr1	53657038	53657350	+	11.66	LineageSpe
XLOC_000197	linc-DMRTB1-2	TCONS_00000041	lincRNA	chr1	53793905	53802889	+	8985	1275	LAST	3	chr1	53801842	53802889	1048	141	13.4542	11.0588	84.4706	2	PolyA	AluSx	SINE/Alu	chr1	53802749	53803054	-	11.66	LineageSpe
XLOC_000197	linc-DMRTB1-2	TCONS_00000041	lincRNA	chr1	53793905	53802889	+	8985	1275	LAST	3	chr1	53801842	53802889	1048	238	22.7099	18.6667	84.4706	2	exonized	HAL1	LINE/L1	chr1	53802511	53802748	-	27.91	Ancient
XLOC_000197	linc-DMRTB1-2	TCONS_00000041	lincRNA	chr1	53793905	53802889	+	8985	1275	FIRST	1	chr1	53793905	53794047	143	29	20.2797	2.27451	84.4706	2	SPL	L2c	LINE/L2	chr1	53794019	53794157	-	32.46	Ancient
XLOC_000197	linc-DMRTB1-2	TCONS_00000041	lincRNA	chr1	53793905	53802889	+	8985	1275	LAST	3	chr1	53801842	53802889	1048	669	63.8359	52.4706	84.4706	2	SPL	MER44C	DNA/TcMar-Tigger	chr1	53801804	53802510	+	18.33	Ancient
XLOC_000197	linc-DMRTB1-2	TCONS_00000199	lincRNA	chr1	53793921	53802890	+	8970	326	LAST	3	chr1	53802776	53802890	115	115	100	35.2761	44.1718	2	PolyA_SPL	AluSx	SINE/Alu	chr1	53802749	53803054	-	11.66	LineageSpe
XLOC_000197	linc-DMRTB1-2	TCONS_00000199	lincRNA	chr1	53793921	53802890	+	8970	326	FIRST	1	chr1	53793921	53794047	127	29	22.8346	8.89571	44.1718	2	SPL	L2c	LINE/L2	chr1	53794019	53794157	-	32.46	Ancient
XLOC_000199	linc-C1orf83-2	TCONS_00000200	lincRNA	chr1	54447917	54452234	+	4318	2245	LAST	3	chr1	54451393	54452234	842	22	2.61283	0.979955	98.1737	1	SPL	AluSx	SINE/Alu	chr1	54451110	54451414	-	11.66	LineageSpe
XLOC_000199	linc-C1orf83-2	TCONS_00000200	lincRNA	chr1	54447917	54452234	+	4318	2245	FIRST	1	chr1	54447917	54449018	1102	80	7.25953	3.56347	98.1737	1	exonized	L1MB8	LINE/L1	chr1	54448871	54448950	+	19.45	Ancient
XLOC_000199	linc-C1orf83-2	TCONS_00000200	lincRNA	chr1	54447917	54452234	+	4318	2245	FIRST	1	chr1	54447917	54449018	1102	68	6.1706	3.02895	98.1737	1	SPL	AluJo	SINE/Alu	chr1	54448951	54449239	-	16.42	LineageSpe
XLOC_000199	linc-C1orf83-2	TCONS_00000200	lincRNA	chr1	54447917	54452234	+	4318	2245	MIDDLE	2	chr1	54449702	54450002	301	221	73.4219	9.8441	98.1737	1	SPL	L1MB8	LINE/L1	chr1	54449782	54450017	+	19.45	Ancient
XLOC_000199	linc-C1orf83-2	TCONS_00000200	lincRNA	chr1	54447917	54452234	+	4318	2245	LAST	3	chr1	54451393	54452234	842	282	33.4917	12.5612	98.1737	1	PolyA	AluSx1	SINE/Alu	chr1	54451953	54452261	+	11.14	LineageSpe
XLOC_000199	linc-C1orf83-2	TCONS_00000200	lincRNA	chr1	54447917	54452234	+	4318	2245	LAST	3	chr1	54451393	54452234	842	64	7.60095	2.85078	98.1737	1	exonized	L1MB8	LINE/L1	chr1	54451415	54451478	+	19.45	Ancient
XLOC_000199	linc-C1orf83-2	TCONS_00000200	lincRNA	chr1	54447917	54452234	+	4318	2245	LAST	3	chr1	54451393	54452234	842	465	55.2257	20.7127	98.1737	1	exonized	L1MEc	LINE/L1	chr1	54451488	54451952	+	25.01	Ancient
XLOC_000199	linc-C1orf83-2	TCONS_00000200	lincRNA	chr1	54447917	54452234	+	4318	2245	MIDDLE	2	chr1	54449702	54450002	301	80	26.5781	3.56347	98.1737	1	SPL	AluSq2	SINE/Alu	chr1	54449479	54449781	+	10.62	LineageSpe
XLOC_000199	linc-C1orf83-2	TCONS_00000200	lincRNA	chr1	54447917	54452234	+	4318	2245	FIRST	1	chr1	54447917	54449018	1102	742	67.3321	33.0512	98.1737	1	exonized	L1MEc	LINE/L1	chr1	54448129	54448870	+	25.01	Ancient
XLOC_000199	linc-C1orf83-2	TCONS_00000200	lincRNA	chr1	54447917	54452234	+	4318	2245	FIRST	1	chr1	54447917	54449018	1102	180	16.3339	8.01782	98.1737	1	TSS	MLT1A	LTR/ERVL-MaLR	chr1	54447834	54448096	+	21.86	Ancient
XLOC_000202	linc-ACOT11-1	TCONS_00000947	lincRNA	chr1	54982177	54983024	+	848	468	LAST	2	chr1	54982710	54983024	315	161	51.1111	34.4017	34.4017	1	PolyA	MIRb	SINE/MIR	chr1	54982864	54983047	+	29.76	Ancient
XLOC_000205	linc-BSND-1	TCONS_00000949	lincRNA	chr1	55461470	55462838	+	1369	392	FIRST	1	chr1	55461470	55461557	88	88	100	22.449	22.449	1	TSS_SPL	L2a	LINE/L2	chr1	55460901	55461636	-	29.37	Ancient
XLOC_000206	linc-PRKAA2-9	TCONS_00000205	lincRNA	chr1	55681081	55683124	+	2044	1794	LAST	2	chr1	55681679	55683124	1446	176	12.1715	9.81048	9.81048	1	exonized	MER30	DNA/hAT-Charlie	chr1	55682134	55682309	-	11.13	LineageSpe
XLOC_000207	linc-PRKAA2-8	TCONS_00000206	lincRNA	chr1	56289480	56333921	+	44442	645	LAST	5	chr1	56333771	56333921	151	88	58.2781	13.6434	53.4884	3	SPL	MIRb	SINE/MIR	chr1	56333710	56333858	-	29.76	Ancient
XLOC_000207	linc-PRKAA2-8	TCONS_00000206	lincRNA	chr1	56289480	56333921	+	44442	645	MIDDLE	2	chr1	56297937	56298098	162	162	100	25.1163	53.4884	3	Both_SPL	LTR16C	LTR/ERVL	chr1	56297859	56298294	+	28.16	Ancient
XLOC_000207	linc-PRKAA2-8	TCONS_00000206	lincRNA	chr1	56289480	56333921	+	44442	645	FIRST	1	chr1	56289480	56289574	95	95	100	14.7287	53.4884	3	TSS_SPL	L2b	LINE/L2	chr1	56289346	56289596	-	32.38	Ancient
XLOC_000207	linc-PRKAA2-8	TCONS_00000950	lincRNA	chr1	56289505	56298251	+	8747	385	LAST	2	chr1	56297937	56298251	315	315	100	81.8182	100	3	PolyA_SPL	LTR16C	LTR/ERVL	chr1	56297859	56298294	+	28.16	Ancient
XLOC_000207	linc-PRKAA2-8	TCONS_00000950	lincRNA	chr1	56289505	56298251	+	8747	385	FIRST	1	chr1	56289505	56289574	70	70	100	18.1818	100	3	TSS_SPL	L2b	LINE/L2	chr1	56289346	56289596	-	32.38	Ancient
XLOC_000207	linc-PRKAA2-8	TCONS_00002038	lincRNA	chr1	56289440	56313133	+	23694	329	MIDDLE	2	chr1	56297937	56298098	162	162	100	49.2401	90.2736	3	Both_SPL	LTR16C	LTR/ERVL	chr1	56297859	56298294	+	28.16	Ancient
XLOC_000207	linc-PRKAA2-8	TCONS_00002038	lincRNA	chr1	56289440	56313133	+	23694	329	FIRST	1	chr1	56289440	56289574	135	135	100	41.0334	90.2736	3	TSS_SPL	L2b	LINE/L2	chr1	56289346	56289596	-	32.38	Ancient
XLOC_000208	linc-PRKAA2-7	TCONS_00000951	lincRNA	chr1	56336186	56345756	+	9571	1035	LAST	3	chr1	56345066	56345756	691	188	27.2069	18.1643	45.2174	2	exonized	MER53	DNA/hAT	chr1	56345535	56345722	+	17.48	Ancient
XLOC_000208	linc-PRKAA2-7	TCONS_00000951	lincRNA	chr1	56336186	56345756	+	9571	1035	MIDDLE	2	chr1	56336852	56337131	280	280	100	27.0531	45.2174	2	Both_SPL	MLT2A2	LTR/ERVL	chr1	56336785	56337320	+	14.02	LineageSpe
XLOC_000208	linc-PRKAA2-7	TCONS_00002039	lincRNA	chr1	56336788	56345476	+	8689	755	FIRST	1	chr1	56336788	56337131	344	344	100	45.5629	45.5629	2	TSS_SPL	MLT2A2	LTR/ERVL	chr1	56336785	56337320	+	14.02	LineageSpe
XLOC_000209	linc-PRKAA2-6	TCONS_00000207	lincRNA	chr1	56410760	56415792	+	5033	453	LAST	2	chr1	56415506	56415792	287	252	87.8049	55.6291	80.1325	1	SPL	L2	LINE/L2	chr1	56415467	56415757	+	32.38	Ancient
XLOC_000209	linc-PRKAA2-6	TCONS_00000207	lincRNA	chr1	56410760	56415792	+	5033	453	FIRST	1	chr1	56410760	56410925	166	111	66.8675	24.5033	80.1325	1	SPL	L3	LINE/CR1	chr1	56410815	56411204	+	32.5	Ancient
XLOC_000211	linc-PRKAA2-4	TCONS_00000953	lincRNA	chr1	56441023	56483498	+	42476	224	LAST	2	chr1	56483397	56483498	102	94	92.1569	41.9643	41.9643	1	PolyA	L2a	LINE/L2	chr1	56483405	56483533	-	29.37	Ancient
XLOC_000212	linc-PRKAA2-3	TCONS_00000208	lincRNA	chr1	56611393	56620896	+	9504	731	LAST	3	chr1	56620598	56620896	299	159	53.1773	21.751	21.751	1	SPL	LTR33	LTR/ERVL	chr1	56620277	56620756	-	29.01	Ancient
XLOC_000214	linc-PRKAA2-1	TCONS_00000209	lincRNA	chr1	56880635	56881638	+	1004	545	LAST	4	chr1	56881454	56881638	185	185	100	33.945	51.3761	4	PolyA	MLT1L	LTR/ERVL-MaLR	chr1	56881454	56881690	+	28.7	Ancient
XLOC_000214	linc-PRKAA2-1	TCONS_00000209	lincRNA	chr1	56880635	56881638	+	1004	545	MIDDLE	2	chr1	56880920	56881014	95	95	100	17.4312	51.3761	4	Both_SPL	MIRb	SINE/MIR	chr1	56880910	56881054	-	29.76	Ancient
XLOC_000214	linc-PRKAA2-1	TCONS_00000955	lincRNA	chr1	56880647	56881599	+	953	505	LAST	4	chr1	56881454	56881599	146	146	100	28.9109	49.901	4	PolyA	MLT1L	LTR/ERVL-MaLR	chr1	56881454	56881690	+	28.7	Ancient
XLOC_000214	linc-PRKAA2-1	TCONS_00000955	lincRNA	chr1	56880647	56881599	+	953	505	MIDDLE	2	chr1	56880920	56881025	106	106	100	20.9901	49.901	4	Both_SPL	MIRb	SINE/MIR	chr1	56880910	56881054	-	29.76	Ancient
XLOC_000214	linc-PRKAA2-1	TCONS_00000956	lincRNA	chr1	56880970	56881504	+	535	345	LAST	2	chr1	56881205	56881504	300	51	17	14.7826	27.8261	4	PolyA	MLT1L	LTR/ERVL-MaLR	chr1	56881454	56881690	+	28.7	Ancient
XLOC_000214	linc-PRKAA2-1	TCONS_00000956	lincRNA	chr1	56880970	56881504	+	535	345	FIRST	1	chr1	56880970	56881014	45	45	100	13.0435	27.8261	4	TSS_SPL	MIRb	SINE/MIR	chr1	56880910	56881054	-	29.76	Ancient
XLOC_000214	linc-PRKAA2-1	TCONS_00002041	lincRNA	chr1	56880647	56881609	+	963	332	LAST	2	chr1	56881454	56881609	156	156	100	46.988	46.988	4	PolyA	MLT1L	LTR/ERVL-MaLR	chr1	56881454	56881690	+	28.7	Ancient
XLOC_000218	linc-FGGY-4	TCONS_00000959	lincRNA	chr1	59180600	59181440	+	841	297	LAST	2	chr1	59181166	59181440	275	275	100	92.5926	100	2	PolyA_SPL	Tigger20a	DNA/TcMar-Tigger	chr1	59181078	59181553	+	28.92	Ancient
XLOC_000218	linc-FGGY-4	TCONS_00000959	lincRNA	chr1	59180600	59181440	+	841	297	FIRST	1	chr1	59180600	59180621	22	22	100	7.40741	100	2	TSS_SPL	LTR16E2	LTR/ERVL	chr1	59180466	59180857	+	31.31	Ancient
XLOC_000218	linc-FGGY-4	TCONS_00000960	lincRNA	chr1	59181176	59184660	+	3485	730	LAST	3	chr1	59184233	59184660	428	39	9.11215	5.34247	42.7397	2	PolyA	MIRc	SINE/MIR	chr1	59184622	59184716	+	29.57	Ancient
XLOC_000218	linc-FGGY-4	TCONS_00000960	lincRNA	chr1	59181176	59184660	+	3485	730	MIDDLE	2	chr1	59183429	59183592	164	135	82.3171	18.4932	42.7397	2	SPL	MIRc	SINE/MIR	chr1	59183458	59183638	+	29.57	Ancient
XLOC_000218	linc-FGGY-4	TCONS_00000960	lincRNA	chr1	59181176	59184660	+	3485	730	FIRST	1	chr1	59181176	59181313	138	138	100	18.9041	42.7397	2	TSS_SPL	Tigger20a	DNA/TcMar-Tigger	chr1	59181078	59181553	+	28.92	Ancient
XLOC_000220	linc-FGGY-2	TCONS_00000963	lincRNA	chr1	59592661	59598505	+	5845	561	FIRST	1	chr1	59592661	59592734	74	74	100	13.1907	13.1907	1	TSS_SPL	L1PB4	LINE/L1	chr1	59592579	59592956	+	17.83	Ancient
XLOC_000221	linc-FGGY-1	TCONS_00002046	lincRNA	chr1	59613313	59615760	+	2448	486	FIRST	1	chr1	59613313	59613610	298	151	50.6711	31.07	31.07	1	SPL	L2a	LINE/L2	chr1	59613460	59613984	-	29.37	Ancient
XLOC_000222	linc-HOOK1-1	TCONS_00000042	lincRNA	chr1	60238467	60254499	+	16033	526	MIDDLE	2	chr1	60239723	60239796	74	36	48.6486	6.84411	50.5703	2	SPL	LTR78B	LTR/ERV1	chr1	60239647	60239758	-	30.84	Ancient
XLOC_000222	linc-HOOK1-1	TCONS_00000042	lincRNA	chr1	60238467	60254499	+	16033	526	FIRST	1	chr1	60238467	60238709	243	72	29.6296	13.6882	50.5703	2	TSS	MIR	SINE/MIR	chr1	60238325	60238538	-	27.84	Ancient
XLOC_000222	linc-HOOK1-1	TCONS_00000042	lincRNA	chr1	60238467	60254499	+	16033	526	FIRST	1	chr1	60238467	60238709	243	158	65.0206	30.038	50.5703	2	SPL	MIRb	SINE/MIR	chr1	60238552	60238719	-	29.76	Ancient
XLOC_000222	linc-HOOK1-1	TCONS_00002047	lincRNA	chr1	60238531	60239749	+	1219	206	LAST	2	chr1	60239723	60239749	27	27	100	13.1068	89.8058	2	PolyA_SPL	LTR78B	LTR/ERV1	chr1	60239647	60239758	-	30.84	Ancient
XLOC_000222	linc-HOOK1-1	TCONS_00002047	lincRNA	chr1	60238531	60239749	+	1219	206	FIRST	1	chr1	60238531	60238709	179	158	88.2682	76.699	89.8058	2	SPL	MIRb	SINE/MIR	chr1	60238552	60238719	-	29.76	Ancient
XLOC_000223	linc-NFIA-4	TCONS_00000964	lincRNA	chr1	60539554	60542979	+	3426	338	LAST	2	chr1	60542842	60542979	138	122	88.4058	36.0947	36.0947	1	PolyA	MLT1K	LTR/ERVL-MaLR	chr1	60542858	60543045	+	29.25	Ancient
XLOC_000224	linc-NFIA-3	TCONS_00000213	lincRNA	chr1	60580547	60615351	+	34805	683	LAST	3	chr1	60614909	60615351	443	106	23.9278	15.5198	30.0146	2	PolyA	MIRb	SINE/MIR	chr1	60615246	60615460	-	29.76	Ancient
XLOC_000224	linc-NFIA-3	TCONS_00000213	lincRNA	chr1	60580547	60615351	+	34805	683	FIRST	1	chr1	60580547	60580645	99	99	100	14.4949	30.0146	2	TSS_SPL	L2c	LINE/L2	chr1	60580417	60580753	-	32.46	Ancient
XLOC_000225	linc-NFIA-2	TCONS_00000966	lincRNA	chr1	60708563	60724248	+	15686	218	LAST	3	chr1	60724187	60724248	62	62	100	28.4404	96.789	1	PolyA_SPL	MIRb	SINE/MIR	chr1	60724073	60724288	-	29.76	Ancient
XLOC_000225	linc-NFIA-2	TCONS_00000966	lincRNA	chr1	60708563	60724248	+	15686	218	MIDDLE	2	chr1	60720150	60720298	149	149	100	68.3486	96.789	1	Both_SPL	L3	LINE/CR1	chr1	60719873	60720306	+	32.5	Ancient
XLOC_000226	linc-NFIA-1	TCONS_00000967	lincRNA	chr1	60880143	60881834	+	1692	349	FIRST	1	chr1	60880143	60880185	43	43	100	12.3209	12.3209	1	TSS_SPL	L2c	LINE/L2	chr1	60879991	60880483	+	32.46	Ancient
XLOC_000227	linc-INADL-1	TCONS_00000968	lincRNA	chr1	62102824	62113990	+	11167	420	LAST	2	chr1	62113728	62113990	263	39	14.8289	9.28571	63.0952	1	PolyA	L2b	LINE/L2	chr1	62113952	62114076	-	32.38	Ancient
XLOC_000227	linc-INADL-1	TCONS_00000968	lincRNA	chr1	62102824	62113990	+	11167	420	LAST	2	chr1	62113728	62113990	263	226	85.9316	53.8095	63.0952	1	SPL	L2c	LINE/L2	chr1	62113692	62113953	-	32.46	Ancient
XLOC_000228	linc-ATG4C-1	TCONS_00000214	lincRNA	chr1	63154153	63176365	+	22213	1228	LAST	2	chr1	63175309	63176365	1057	112	10.596	9.12052	21.7427	1	SPL	FLAM_A	SINE/Alu	chr1	63175291	63175420	-	18.67	LineageSpe
XLOC_000228	linc-ATG4C-1	TCONS_00000214	lincRNA	chr1	63154153	63176365	+	22213	1228	LAST	2	chr1	63175309	63176365	1057	155	14.6641	12.6221	21.7427	1	exonized	MIRb	SINE/MIR	chr1	63175794	63175948	+	29.76	Ancient
XLOC_000229	linc-FOXD3-5	TCONS_00000215	lincRNA	chr1	63361680	63367310	+	5631	447	LAST	2	chr1	63366965	63367310	346	221	63.8728	49.4407	72.0358	1	exonized	MIR3	SINE/MIR	chr1	63367021	63367241	+	29.77	Ancient
XLOC_000229	linc-FOXD3-5	TCONS_00000215	lincRNA	chr1	63361680	63367310	+	5631	447	FIRST	1	chr1	63361680	63361780	101	101	100	22.5951	72.0358	1	TSS_SPL	AluJo	SINE/Alu	chr1	63361636	63361931	-	16.42	LineageSpe
XLOC_000230	linc-FOXD3-4	TCONS_00000216	lincRNA	chr1	63489878	63491329	+	1452	359	LAST	2	chr1	63491075	63491329	255	14	5.4902	3.89972	71.0306	1	PolyA	AluSz	SINE/Alu	chr1	63491316	63491591	-	12.11	LineageSpe
XLOC_000230	linc-FOXD3-4	TCONS_00000216	lincRNA	chr1	63489878	63491329	+	1452	359	LAST	2	chr1	63491075	63491329	255	241	94.5098	67.1309	71.0306	1	SPL	L1MEi	LINE/L1	chr1	63490859	63491315	+	28.17	Ancient
XLOC_000231	linc-FOXD3-3	TCONS_00000217	lincRNA	chr1	63604921	63628824	+	23904	823	MIDDLE	2	chr1	63624707	63624874	168	146	86.9048	17.74	38.0316	1	SPL	CR1_Mam	LINE/CR1	chr1	63624729	63624963	+	29.79	Ancient
XLOC_000231	linc-FOXD3-3	TCONS_00000217	lincRNA	chr1	63604921	63628824	+	23904	823	FIRST	1	chr1	63604921	63605168	248	167	67.3387	20.2916	38.0316	1	TSS	AluSx3	SINE/Alu	chr1	63604778	63605087	-	11.23	LineageSpe
XLOC_000232	linc-FOXD3-2	TCONS_00002048	lincRNA	chr1	63662012	63664798	+	2787	803	FIRST	1	chr1	63662012	63662118	107	61	57.0093	7.59651	7.59651	1	SPL	L2c	LINE/L2	chr1	63662058	63662272	+	32.46	Ancient
XLOC_000233	linc-FOXD3-1	TCONS_00000218	lincRNA	chr1	63715694	63717442	+	1749	754	LAST	2	chr1	63717127	63717442	316	36	11.3924	4.77454	54.3767	1	SPL	AluJb	SINE/Alu	chr1	63716853	63717162	-	16.49	LineageSpe
XLOC_000233	linc-FOXD3-1	TCONS_00000218	lincRNA	chr1	63715694	63717442	+	1749	754	FIRST	1	chr1	63715694	63716131	438	141	32.1918	18.7003	54.3767	1	SPL	AluSp	SINE/Alu	chr1	63715991	63716290	-	9.53	LineageSpe
XLOC_000233	linc-FOXD3-1	TCONS_00000218	lincRNA	chr1	63715694	63717442	+	1749	754	FIRST	1	chr1	63715694	63716131	438	233	53.1963	30.9019	54.3767	1	TSS	MER8	DNA/TcMar-Tigger	chr1	63715643	63715926	+	22.16	LineageSpe
XLOC_000235	linc-UBE2U-1	TCONS_00000970	lincRNA	chr1	64652512	64657832	+	5321	457	FIRST	1	chr1	64652512	64652652	141	115	81.5603	25.1641	96.9365	1	TSS	LTR18A	LTR/ERVL	chr1	64652290	64652626	+	16.33	LineageSpe
XLOC_000235	linc-UBE2U-1	TCONS_00000970	lincRNA	chr1	64652512	64657832	+	5321	457	LAST	2	chr1	64657517	64657832	316	316	100	69.1466	96.9365	1	PolyA_SPL	HERVL18-int	LTR/ERVL	chr1	64652641	64658105	+	16.79	LineageSpe
XLOC_000235	linc-UBE2U-1	TCONS_00000970	lincRNA	chr1	64652512	64657832	+	5321	457	FIRST	1	chr1	64652512	64652652	141	12	8.51064	2.62582	96.9365	1	SPL	HERVL18-int	LTR/ERVL	chr1	64652641	64658105	+	16.79	LineageSpe
XLOC_000236	linc-GADD45A-1	TCONS_00000219	lincRNA	chr1	67995313	67998012	+	2700	408	LAST	3	chr1	67997789	67998012	224	224	100	54.902	84.3137	6	PolyA_SPL	MLT1D	LTR/ERVL-MaLR	chr1	67997610	67998059	+	21.73	Ancient
XLOC_000236	linc-GADD45A-1	TCONS_00000219	lincRNA	chr1	67995313	67998012	+	2700	408	FIRST	1	chr1	67995313	67995432	120	120	100	29.4118	84.3137	6	TSS_SPL	AluSq10	SINE/Alu	chr1	67995286	67995590	-	9.36	LineageSpe
XLOC_000236	linc-GADD45A-1	TCONS_00000971	lincRNA	chr1	67988060	67998015	+	9956	373	FIRST	1	chr1	67988060	67988081	22	22	100	5.89812	82.8418	6	TSS_SPL	LTR47A	LTR/ERVL	chr1	67987821	67988118	+	16.17	LineageSpe
XLOC_000236	linc-GADD45A-1	TCONS_00000971	lincRNA	chr1	67988060	67998015	+	9956	373	LAST	4	chr1	67997789	67998015	227	227	100	60.8579	82.8418	6	PolyA_SPL	MLT1D	LTR/ERVL-MaLR	chr1	67997610	67998059	+	21.73	Ancient
XLOC_000236	linc-GADD45A-1	TCONS_00000971	lincRNA	chr1	67988060	67998015	+	9956	373	MIDDLE	2	chr1	67993061	67993120	60	60	100	16.0858	82.8418	6	Both_SPL	L2b	LINE/L2	chr1	67993031	67993129	-	32.38	Ancient
XLOC_000236	linc-GADD45A-1	TCONS_00002051	lincRNA	chr1	67987996	67998014	+	10019	366	FIRST	1	chr1	67987996	67988081	86	86	100	23.4973	100	6	TSS_SPL	LTR47A	LTR/ERVL	chr1	67987821	67988118	+	16.17	LineageSpe
XLOC_000236	linc-GADD45A-1	TCONS_00002051	lincRNA	chr1	67987996	67998014	+	10019	366	LAST	3	chr1	67997789	67998014	226	226	100	61.7486	100	6	PolyA_SPL	MLT1D	LTR/ERVL-MaLR	chr1	67997610	67998059	+	21.73	Ancient
XLOC_000236	linc-GADD45A-1	TCONS_00002051	lincRNA	chr1	67987996	67998014	+	10019	366	MIDDLE	2	chr1	67993067	67993120	54	54	100	14.7541	100	6	Both_SPL	L2b	LINE/L2	chr1	67993031	67993129	-	32.38	Ancient
XLOC_000236	linc-GADD45A-1	TCONS_00002052	lincRNA	chr1	67987996	67998014	+	10019	372	FIRST	1	chr1	67987996	67988081	86	86	100	23.1183	100	6	TSS_SPL	LTR47A	LTR/ERVL	chr1	67987821	67988118	+	16.17	LineageSpe
XLOC_000236	linc-GADD45A-1	TCONS_00002052	lincRNA	chr1	67987996	67998014	+	10019	372	LAST	3	chr1	67997789	67998014	226	226	100	60.7527	100	6	PolyA_SPL	MLT1D	LTR/ERVL-MaLR	chr1	67997610	67998059	+	21.73	Ancient
XLOC_000236	linc-GADD45A-1	TCONS_00002052	lincRNA	chr1	67987996	67998014	+	10019	372	MIDDLE	2	chr1	67993061	67993120	60	60	100	16.129	100	6	Both_SPL	L2b	LINE/L2	chr1	67993031	67993129	-	32.38	Ancient
XLOC_000236	linc-GADD45A-1	TCONS_00002053	lincRNA	chr1	67988053	67998015	+	9963	395	FIRST	1	chr1	67988053	67988081	29	29	100	7.34177	83.7975	6	TSS_SPL	LTR47A	LTR/ERVL	chr1	67987821	67988118	+	16.17	LineageSpe
XLOC_000236	linc-GADD45A-1	TCONS_00002053	lincRNA	chr1	67988053	67998015	+	9963	395	LAST	4	chr1	67997789	67998015	227	227	100	57.4684	83.7975	6	PolyA_SPL	MLT1D	LTR/ERVL-MaLR	chr1	67997610	67998059	+	21.73	Ancient
XLOC_000236	linc-GADD45A-1	TCONS_00002053	lincRNA	chr1	67988053	67998015	+	9963	395	MIDDLE	2	chr1	67993046	67993120	75	75	100	18.9873	83.7975	6	Both_SPL	L2b	LINE/L2	chr1	67993031	67993129	-	32.38	Ancient
XLOC_000236	linc-GADD45A-1	TCONS_00002054	lincRNA	chr1	67995304	67998014	+	2711	417	LAST	3	chr1	67997791	67998014	224	224	100	53.717	84.6523	6	PolyA_SPL	MLT1D	LTR/ERVL-MaLR	chr1	67997610	67998059	+	21.73	Ancient
XLOC_000236	linc-GADD45A-1	TCONS_00002054	lincRNA	chr1	67995304	67998014	+	2711	417	FIRST	1	chr1	67995304	67995432	129	129	100	30.9353	84.6523	6	TSS_SPL	AluSq10	SINE/Alu	chr1	67995286	67995590	-	9.36	LineageSpe
XLOC_000238	linc-LRRC7-5	TCONS_00000973	lincRNA	chr1	68421109	68441255	+	20147	658	FIRST	1	chr1	68421109	68421467	359	317	88.3008	48.1763	48.1763	1	TSS	L2	LINE/L2	chr1	68420808	68421425	+	32.38	Ancient
XLOC_000243	linc-LRRC7-1	TCONS_00000221	lincRNA	chr1	69898938	69901092	+	2155	458	LAST	2	chr1	69900686	69901092	407	323	79.3612	70.524	70.524	1	SPL	LTR33B	LTR/ERVL	chr1	69900557	69901008	-	30.34	Ancient
XLOC_000246	linc-FPGT-12	TCONS_00000044	lincRNA	chr1	71172136	71252149	+	80014	2084	LAST	7	chr1	71250869	71252149	1281	34	2.65418	1.63148	25.7678	2	SPL	L1MC	LINE/L1	chr1	71250588	71250902	+	22.45	Ancient
XLOC_000246	linc-FPGT-12	TCONS_00000044	lincRNA	chr1	71172136	71252149	+	80014	2084	MIDDLE	2	chr1	71173411	71173664	254	45	17.7165	2.15931	25.7678	2	SPL	MIR	SINE/MIR	chr1	71173620	71173858	-	27.84	Ancient
XLOC_000246	linc-FPGT-12	TCONS_00000044	lincRNA	chr1	71172136	71252149	+	80014	2084	MIDDLE	3	chr1	71174404	71174453	50	21	42	1.00768	25.7678	2	SPL	L1ME4b	LINE/L1	chr1	71174365	71174424	-	26.79	Ancient
XLOC_000246	linc-FPGT-12	TCONS_00000044	lincRNA	chr1	71172136	71252149	+	80014	2084	MIDDLE	2	chr1	71173411	71173664	254	87	34.252	4.17466	25.7678	2	exonized	MIR3	SINE/MIR	chr1	71173512	71173598	+	29.77	Ancient
XLOC_000246	linc-FPGT-12	TCONS_00000044	lincRNA	chr1	71172136	71252149	+	80014	2084	FIRST	1	chr1	71172136	71172214	79	79	100	3.79079	25.7678	2	TSS_SPL	LTR1B0	LTR/ERV1	chr1	71171988	71172724	-	13.64	LineageSpe
XLOC_000246	linc-FPGT-12	TCONS_00000044	lincRNA	chr1	71172136	71252149	+	80014	2084	LAST	7	chr1	71250869	71252149	1281	196	15.3005	9.40499	25.7678	2	exonized	MIRb	SINE/MIR	chr1	71251587	71251782	+	29.76	Ancient
XLOC_000246	linc-FPGT-12	TCONS_00000044	lincRNA	chr1	71172136	71252149	+	80014	2084	MIDDLE	4	chr1	71177740	71177814	75	75	100	3.59885	25.7678	2	Both_SPL	Tigger2	DNA/TcMar-Tigger	chr1	71175774	71177925	+	14.59	LineageSpe
XLOC_000246	linc-FPGT-12	TCONS_00000975	lincRNA	chr1	71226073	71252214	+	26142	1425	LAST	2	chr1	71250869	71252214	1346	34	2.526	2.38596	16.9123	2	SPL	L1MC	LINE/L1	chr1	71250588	71250902	+	22.45	Ancient
XLOC_000246	linc-FPGT-12	TCONS_00000975	lincRNA	chr1	71226073	71252214	+	26142	1425	LAST	2	chr1	71250869	71252214	1346	11	0.817236	0.77193	16.9123	2	PolyA	MIRc	SINE/MIR	chr1	71252204	71252371	+	29.57	Ancient
XLOC_000246	linc-FPGT-12	TCONS_00000975	lincRNA	chr1	71226073	71252214	+	26142	1425	LAST	2	chr1	71250869	71252214	1346	196	14.5617	13.7544	16.9123	2	exonized	MIRb	SINE/MIR	chr1	71251587	71251782	+	29.76	Ancient
XLOC_000247	linc-FPGT-11	TCONS_00000976	lincRNA	chr1	71303920	71304747	+	828	740	FIRST	1	chr1	71303920	71304557	638	273	42.79	36.8919	50.1351	1	exonized	L1MD3	LINE/L1	chr1	71304258	71304530	-	21.85	Ancient
XLOC_000247	linc-FPGT-11	TCONS_00000976	lincRNA	chr1	71303920	71304747	+	828	740	FIRST	1	chr1	71303920	71304557	638	98	15.3605	13.2432	50.1351	1	exonized	MER4A1	LTR/ERV1	chr1	71303968	71304065	+	10.87	LineageSpe
XLOC_000253	linc-FPGT-5	TCONS_00000982	lincRNA	chr1	73020893	73023568	+	2676	214	LAST	2	chr1	73023544	73023568	25	25	100	11.6822	11.6822	1	PolyA_SPL	LTR50	LTR/ERVL	chr1	73023167	73023620	+	24.63	Ancient
XLOC_000254	linc-FPGT-4	TCONS_00000227	lincRNA	chr1	73240954	73256963	+	16010	1331	FIRST	1	chr1	73240954	73241227	274	53	19.3431	3.98197	44.8535	2	TSS	L2a	LINE/L2	chr1	73240420	73241006	-	29.37	Ancient
XLOC_000254	linc-FPGT-4	TCONS_00000227	lincRNA	chr1	73240954	73256963	+	16010	1331	MIDDLE	4	chr1	73249353	73249566	214	131	61.215	9.84222	44.8535	2	SPL	MIR	SINE/MIR	chr1	73249436	73249580	-	27.84	Ancient
XLOC_000254	linc-FPGT-4	TCONS_00000227	lincRNA	chr1	73240954	73256963	+	16010	1331	LAST	6	chr1	73256748	73256963	216	216	100	16.2284	44.8535	2	PolyA_SPL	LTR52	LTR/ERVL	chr1	73256666	73257048	+	22.95	Ancient
XLOC_000254	linc-FPGT-4	TCONS_00000227	lincRNA	chr1	73240954	73256963	+	16010	1331	MIDDLE	3	chr1	73245790	73245976	187	125	66.8449	9.39144	44.8535	2	SPL	L2a	LINE/L2	chr1	73245729	73245914	+	29.37	Ancient
XLOC_000254	linc-FPGT-4	TCONS_00000227	lincRNA	chr1	73240954	73256963	+	16010	1331	MIDDLE	4	chr1	73249353	73249566	214	72	33.6449	5.40947	44.8535	2	SPL	AluJo	SINE/Alu	chr1	73249337	73249424	-	16.42	LineageSpe
XLOC_000254	linc-FPGT-4	TCONS_00000983	lincRNA	chr1	73240864	73249663	+	8800	760	LAST	3	chr1	73249353	73249663	311	72	23.1511	9.47368	47.3684	2	SPL	AluJo	SINE/Alu	chr1	73249337	73249424	-	16.42	LineageSpe
XLOC_000254	linc-FPGT-4	TCONS_00000983	lincRNA	chr1	73240864	73249663	+	8800	760	LAST	3	chr1	73249353	73249663	311	145	46.6238	19.0789	47.3684	2	exonized	MIR	SINE/MIR	chr1	73249436	73249580	-	27.84	Ancient
XLOC_000254	linc-FPGT-4	TCONS_00000983	lincRNA	chr1	73240864	73249663	+	8800	760	FIRST	1	chr1	73240864	73241227	364	143	39.2857	18.8158	47.3684	2	TSS	L2a	LINE/L2	chr1	73240420	73241006	-	29.37	Ancient
XLOC_000255	linc-FPGT-3	TCONS_00000984	lincRNA	chr1	73315920	73320112	+	4193	406	LAST	2	chr1	73319838	73320112	275	116	42.1818	28.5714	57.3892	1	PolyA	ERVL-B4-int	LTR/ERVL	chr1	73319997	73320698	-	20.73	Ancient
XLOC_000255	linc-FPGT-3	TCONS_00000984	lincRNA	chr1	73315920	73320112	+	4193	406	LAST	2	chr1	73319838	73320112	275	117	42.5455	28.8177	57.3892	1	exonized	MLT2B1	LTR/ERVL	chr1	73319861	73319977	-	20.04	Ancient
XLOC_000256	linc-FPGT-2	TCONS_00000046	lincRNA	chr1	73771853	73804559	+	32707	3870	FIRST	1	chr1	73771853	73771957	105	105	100	2.71318	65.168	10	TSS_SPL	LTR53	LTR/ERVL	chr1	73771758	73772251	-	21.45	Ancient
XLOC_000256	linc-FPGT-2	TCONS_00000046	lincRNA	chr1	73771853	73804559	+	32707	3870	MIDDLE	2	chr1	73772851	73773046	196	17	8.67347	0.439276	65.168	10	SPL	LTR67B	LTR/ERVL	chr1	73773030	73773208	+	28.76	Ancient
XLOC_000256	linc-FPGT-2	TCONS_00000046	lincRNA	chr1	73771853	73804559	+	32707	3870	LAST	4	chr1	73801129	73804559	3431	249	7.25736	6.43411	65.168	10	exonized	AluY	SINE/Alu	chr1	73802480	73802728	+	6.92	LineageSpe
XLOC_000256	linc-FPGT-2	TCONS_00000046	lincRNA	chr1	73771853	73804559	+	32707	3870	LAST	4	chr1	73801129	73804559	3431	107	3.11862	2.76486	65.168	10	SPL	L1MEg1	LINE/L1	chr1	73800925	73801235	+	28.49	Ancient
XLOC_000256	linc-FPGT-2	TCONS_00000046	lincRNA	chr1	73771853	73804559	+	32707	3870	LAST	4	chr1	73801129	73804559	3431	242	7.05334	6.25323	65.168	10	exonized	L1ME3A	LINE/L1	chr1	73801969	73802210	+	25.23	Ancient
XLOC_000256	linc-FPGT-2	TCONS_00000046	lincRNA	chr1	73771853	73804559	+	32707	3870	LAST	4	chr1	73801129	73804559	3431	216	6.29554	5.5814	65.168	10	exonized	L1ME3A	LINE/L1	chr1	73803182	73803397	+	25.23	Ancient
XLOC_000256	linc-FPGT-2	TCONS_00000046	lincRNA	chr1	73771853	73804559	+	32707	3870	LAST	4	chr1	73801129	73804559	3431	215	6.26639	5.55556	65.168	10	exonized	L1ME3A	LINE/L1	chr1	73802250	73802464	+	25.23	Ancient
XLOC_000256	linc-FPGT-2	TCONS_00000046	lincRNA	chr1	73771853	73804559	+	32707	3870	LAST	4	chr1	73801129	73804559	3431	450	13.1157	11.6279	65.168	10	exonized	MLT1E1A	LTR/ERVL-MaLR	chr1	73802730	73803179	+	24.11	Ancient
XLOC_000256	linc-FPGT-2	TCONS_00000046	lincRNA	chr1	73771853	73804559	+	32707	3870	MIDDLE	3	chr1	73776536	73776673	138	138	100	3.56589	65.168	10	Both_SPL	LTR38	LTR/ERV1	chr1	73776384	73776930	+	22.03	LineageSpe
XLOC_000256	linc-FPGT-2	TCONS_00000046	lincRNA	chr1	73771853	73804559	+	32707	3870	LAST	4	chr1	73801129	73804559	3431	102	2.97289	2.63566	65.168	10	PolyA	L1MA7	LINE/L1	chr1	73804458	73805446	-	17.92	Ancient
XLOC_000256	linc-FPGT-2	TCONS_00000046	lincRNA	chr1	73771853	73804559	+	32707	3870	LAST	4	chr1	73801129	73804559	3431	681	19.8484	17.5969	65.168	10	exonized	L1M4	LINE/L1	chr1	73801288	73801968	+	21.84	Ancient
XLOC_000256	linc-FPGT-2	TCONS_00000228	lincRNA	chr1	73771912	73813995	+	42084	363	MIDDLE	2	chr1	73776536	73776673	138	138	100	38.0165	50.6887	10	Both_SPL	LTR38	LTR/ERV1	chr1	73776384	73776930	+	22.03	LineageSpe
XLOC_000256	linc-FPGT-2	TCONS_00000228	lincRNA	chr1	73771912	73813995	+	42084	363	FIRST	1	chr1	73771912	73771957	46	46	100	12.6722	50.6887	10	TSS_SPL	LTR53	LTR/ERVL	chr1	73771758	73772251	-	21.45	Ancient
XLOC_000256	linc-FPGT-2	TCONS_00000229	lincRNA	chr1	73771917	73820934	+	49018	358	MIDDLE	2	chr1	73776536	73776673	138	138	100	38.5475	50	10	Both_SPL	LTR38	LTR/ERV1	chr1	73776384	73776930	+	22.03	LineageSpe
XLOC_000256	linc-FPGT-2	TCONS_00000229	lincRNA	chr1	73771917	73820934	+	49018	358	FIRST	1	chr1	73771917	73771957	41	41	100	11.4525	50	10	TSS_SPL	LTR53	LTR/ERVL	chr1	73771758	73772251	-	21.45	Ancient
XLOC_000256	linc-FPGT-2	TCONS_00000230	lincRNA	chr1	73771922	73773255	+	1334	441	LAST	2	chr1	73772851	73773255	405	179	44.1975	40.5896	48.7528	10	exonized	LTR67B	LTR/ERVL	chr1	73773030	73773208	+	28.76	Ancient
XLOC_000256	linc-FPGT-2	TCONS_00000230	lincRNA	chr1	73771922	73773255	+	1334	441	FIRST	1	chr1	73771922	73771957	36	36	100	8.16327	48.7528	10	TSS_SPL	LTR53	LTR/ERVL	chr1	73771758	73772251	-	21.45	Ancient
XLOC_000256	linc-FPGT-2	TCONS_00000231	lincRNA	chr1	73772899	73785344	+	12446	480	FIRST	1	chr1	73772899	73773046	148	17	11.4865	3.54167	72.7083	10	SPL	LTR67B	LTR/ERVL	chr1	73773030	73773208	+	28.76	Ancient
XLOC_000256	linc-FPGT-2	TCONS_00000231	lincRNA	chr1	73772899	73785344	+	12446	480	LAST	3	chr1	73785151	73785344	194	194	100	40.4167	72.7083	10	PolyA_SPL	L1MB8	LINE/L1	chr1	73784651	73785811	-	19.45	Ancient
XLOC_000256	linc-FPGT-2	TCONS_00000231	lincRNA	chr1	73772899	73785344	+	12446	480	MIDDLE	2	chr1	73776536	73776673	138	138	100	28.75	72.7083	10	Both_SPL	LTR38	LTR/ERV1	chr1	73776384	73776930	+	22.03	LineageSpe
XLOC_000256	linc-FPGT-2	TCONS_00000985	lincRNA	chr1	73771635	73813934	+	42300	441	FIRST	1	chr1	73771635	73771957	323	200	61.9195	45.3515	45.3515	10	SPL	LTR53	LTR/ERVL	chr1	73771758	73772251	-	21.45	Ancient
XLOC_000256	linc-FPGT-2	TCONS_00002064	lincRNA	chr1	73771821	73785323	+	13503	448	LAST	3	chr1	73785151	73785323	173	173	100	38.6161	100	10	PolyA_SPL	L1MB8	LINE/L1	chr1	73784651	73785811	-	19.45	Ancient
XLOC_000256	linc-FPGT-2	TCONS_00002064	lincRNA	chr1	73771821	73785323	+	13503	448	FIRST	1	chr1	73771821	73771957	137	137	100	30.5804	100	10	TSS_SPL	LTR53	LTR/ERVL	chr1	73771758	73772251	-	21.45	Ancient
XLOC_000256	linc-FPGT-2	TCONS_00002064	lincRNA	chr1	73771821	73785323	+	13503	448	MIDDLE	2	chr1	73776536	73776673	138	138	100	30.8036	100	10	Both_SPL	LTR38	LTR/ERV1	chr1	73776384	73776930	+	22.03	LineageSpe
XLOC_000256	linc-FPGT-2	TCONS_00002065	lincRNA	chr1	73771821	73785323	+	13503	471	LAST	3	chr1	73785151	73785323	173	173	100	36.7304	100	10	PolyA_SPL	L1MB8	LINE/L1	chr1	73784651	73785811	-	19.45	Ancient
XLOC_000256	linc-FPGT-2	TCONS_00002065	lincRNA	chr1	73771821	73785323	+	13503	471	FIRST	1	chr1	73771821	73771980	160	160	100	33.9703	100	10	TSS_SPL	LTR53	LTR/ERVL	chr1	73771758	73772251	-	21.45	Ancient
XLOC_000256	linc-FPGT-2	TCONS_00002065	lincRNA	chr1	73771821	73785323	+	13503	471	MIDDLE	2	chr1	73776536	73776673	138	138	100	29.2994	100	10	Both_SPL	LTR38	LTR/ERV1	chr1	73776384	73776930	+	22.03	LineageSpe
XLOC_000256	linc-FPGT-2	TCONS_00002066	lincRNA	chr1	73771821	73813975	+	42155	457	MIDDLE	2	chr1	73776536	73776673	138	138	100	30.1969	65.2079	10	Both_SPL	LTR38	LTR/ERV1	chr1	73776384	73776930	+	22.03	LineageSpe
XLOC_000256	linc-FPGT-2	TCONS_00002066	lincRNA	chr1	73771821	73813975	+	42155	457	FIRST	1	chr1	73771821	73771980	160	160	100	35.0109	65.2079	10	TSS_SPL	LTR53	LTR/ERVL	chr1	73771758	73772251	-	21.45	Ancient
XLOC_000256	linc-FPGT-2	TCONS_00002067	lincRNA	chr1	73771821	73820918	+	49098	461	MIDDLE	2	chr1	73776536	73776673	138	138	100	29.9349	64.6421	10	Both_SPL	LTR38	LTR/ERV1	chr1	73776384	73776930	+	22.03	LineageSpe
XLOC_000256	linc-FPGT-2	TCONS_00002067	lincRNA	chr1	73771821	73820918	+	49098	461	FIRST	1	chr1	73771821	73771980	160	160	100	34.7072	64.6421	10	TSS_SPL	LTR53	LTR/ERVL	chr1	73771758	73772251	-	21.45	Ancient
XLOC_000259	linc-LHX8-1	TCONS_00000234	lincRNA	chr1	75428998	75430802	+	1805	339	FIRST	1	chr1	75428998	75429051	54	54	100	15.9292	15.9292	1	TSS_SPL	MER57B2	LTR/ERV1	chr1	75428764	75429134	-	16.64	LineageSpe
XLOC_000262	linc-AK5-2	TCONS_00000237	lincRNA	chr1	77533605	77544167	+	10563	497	MIDDLE	3	chr1	77534421	77534528	108	29	26.8519	5.83501	13.8833	1	SPL	MIR	SINE/MIR	chr1	77534500	77534718	-	27.84	Ancient
XLOC_000262	linc-AK5-2	TCONS_00000237	lincRNA	chr1	77533605	77544167	+	10563	497	MIDDLE	3	chr1	77534421	77534528	108	40	37.037	8.04829	13.8833	1	SPL	MIRc	SINE/MIR	chr1	77534403	77534460	-	29.57	Ancient
XLOC_000263	linc-AK5-1	TCONS_00000997	lincRNA	chr1	77685227	77686671	+	1445	311	LAST	2	chr1	77686473	77686671	199	15	7.53769	4.82315	61.7363	2	SPL	L2a	LINE/L2	chr1	77686456	77686487	-	29.37	Ancient
XLOC_000263	linc-AK5-1	TCONS_00000997	lincRNA	chr1	77685227	77686671	+	1445	311	LAST	2	chr1	77686473	77686671	199	177	88.9447	56.9132	61.7363	2	PolyA	LTR64	LTR/ERV1	chr1	77686495	77686804	+	16.78	Ancient
XLOC_000263	linc-AK5-1	TCONS_00000998	lincRNA	chr1	77686609	77686969	+	361	272	LAST	2	chr1	77686768	77686969	202	37	18.3168	13.6029	100	2	SPL	LTR64	LTR/ERV1	chr1	77686495	77686804	+	16.78	Ancient
XLOC_000263	linc-AK5-1	TCONS_00000998	lincRNA	chr1	77686609	77686969	+	361	272	LAST	2	chr1	77686768	77686969	202	165	81.6832	60.6618	100	2	PolyA	THE1B	LTR/ERVL-MaLR	chr1	77686805	77687010	-	12.8	LineageSpe
XLOC_000263	linc-AK5-1	TCONS_00000998	lincRNA	chr1	77686609	77686969	+	361	272	FIRST	1	chr1	77686609	77686678	70	70	100	25.7353	100	2	TSS_SPL	LTR64	LTR/ERV1	chr1	77686495	77686804	+	16.78	Ancient
XLOC_000264	linc-PTGFR-1	TCONS_00000048	lincRNA	chr1	78695283	78759574	+	64292	1993	LAST	6	chr1	78759275	78759574	300	130	43.3333	6.52283	32.012	7	SPL	THE1A	LTR/ERVL-MaLR	chr1	78759054	78759404	+	10.32	LineageSpe
XLOC_000264	linc-PTGFR-1	TCONS_00000048	lincRNA	chr1	78695283	78759574	+	64292	1993	LAST	6	chr1	78759275	78759574	300	170	56.6667	8.52985	32.012	7	PolyA	THE1A-int	LTR/ERVL-MaLR	chr1	78759405	78760998	+	9.93	LineageSpe
XLOC_000264	linc-PTGFR-1	TCONS_00000048	lincRNA	chr1	78695283	78759574	+	64292	1993	MIDDLE	4	chr1	78758164	78758315	152	152	100	7.62669	32.012	7	Both_SPL	MLT1I	LTR/ERVL-MaLR	chr1	78758136	78758512	+	29.11	Ancient
XLOC_000264	linc-PTGFR-1	TCONS_00000048	lincRNA	chr1	78695283	78759574	+	64292	1993	MIDDLE	5	chr1	78758763	78758961	199	186	93.4673	9.33266	32.012	7	SPL	Tigger2a	DNA/TcMar-Tigger	chr1	78758776	78759053	+	15.85	LineageSpe
XLOC_000264	linc-PTGFR-1	TCONS_00000999	lincRNA	chr1	78689326	78758219	+	68894	606	LAST	4	chr1	78758164	78758219	56	56	100	9.24092	36.6337	7	PolyA_SPL	MLT1I	LTR/ERVL-MaLR	chr1	78758136	78758512	+	29.11	Ancient
XLOC_000264	linc-PTGFR-1	TCONS_00000999	lincRNA	chr1	78689326	78758219	+	68894	606	FIRST	1	chr1	78689326	78689358	33	33	100	5.44554	36.6337	7	TSS_SPL	L2b	LINE/L2	chr1	78689222	78689374	-	32.38	Ancient
XLOC_000264	linc-PTGFR-1	TCONS_00000999	lincRNA	chr1	78689326	78758219	+	68894	606	MIDDLE	2	chr1	78690955	78691087	133	133	100	21.9472	36.6337	7	Both_SPL	ERVL-E-int	LTR/ERVL	chr1	78690779	78691144	-	30.69	Ancient
XLOC_000264	linc-PTGFR-1	TCONS_00001000	lincRNA	chr1	78690958	78716742	+	25785	1005	FIRST	1	chr1	78690958	78691087	130	130	100	12.9353	12.9353	7	TSS_SPL	ERVL-E-int	LTR/ERVL	chr1	78690779	78691144	-	30.69	Ancient
XLOC_000264	linc-PTGFR-1	TCONS_00001001	lincRNA	chr1	78690958	78717378	+	26421	521	FIRST	1	chr1	78690958	78691087	130	130	100	24.952	24.952	7	TSS_SPL	ERVL-E-int	LTR/ERVL	chr1	78690779	78691144	-	30.69	Ancient
XLOC_000264	linc-PTGFR-1	TCONS_00002073	lincRNA	chr1	78689326	78717247	+	27922	236	MIDDLE	2	chr1	78690955	78691087	133	133	100	56.3559	70.339	7	Both_SPL	ERVL-E-int	LTR/ERVL	chr1	78690779	78691144	-	30.69	Ancient
XLOC_000264	linc-PTGFR-1	TCONS_00002073	lincRNA	chr1	78689326	78717247	+	27922	236	FIRST	1	chr1	78689326	78689358	33	33	100	13.9831	70.339	7	TSS_SPL	L2b	LINE/L2	chr1	78689222	78689374	-	32.38	Ancient
XLOC_000264	linc-PTGFR-1	TCONS_00002075	lincRNA	chr1	78717387	78758219	+	40833	231	LAST	2	chr1	78758164	78758219	56	56	100	24.2424	24.2424	7	PolyA_SPL	MLT1I	LTR/ERVL-MaLR	chr1	78758136	78758512	+	29.11	Ancient
XLOC_000266	linc-LPHN2-2	TCONS_00001003	lincRNA	chr1	79736086	79870246	+	134161	1051	FIRST	1	chr1	79736086	79736371	286	223	77.972	21.2179	26.5461	5	SPL	L1PA12	LINE/L1	chr1	79736149	79738288	+	13.78	LineageSpe
XLOC_000266	linc-LPHN2-2	TCONS_00001003	lincRNA	chr1	79736086	79870246	+	134161	1051	FIRST	1	chr1	79736086	79736371	286	56	19.5804	5.32826	26.5461	5	TSS	LTR12C	LTR/ERV1	chr1	79735184	79736141	+	8.77	LineageSpe
XLOC_000266	linc-LPHN2-2	TCONS_00002076	lincRNA	chr1	79735992	79775346	+	39355	496	FIRST	1	chr1	79735992	79736371	380	223	58.6842	44.9597	75.2016	5	SPL	L1PA12	LINE/L1	chr1	79736149	79738288	+	13.78	LineageSpe
XLOC_000266	linc-LPHN2-2	TCONS_00002076	lincRNA	chr1	79735992	79775346	+	39355	496	FIRST	1	chr1	79735992	79736371	380	150	39.4737	30.2419	75.2016	5	TSS	LTR12C	LTR/ERV1	chr1	79735184	79736141	+	8.77	LineageSpe
XLOC_000266	linc-LPHN2-2	TCONS_00002077	lincRNA	chr1	79775371	79871942	+	96572	244	LAST	3	chr1	79871919	79871942	24	24	100	9.83607	9.83607	5	PolyA_SPL	Tigger17b	DNA/TcMar-Tigger	chr1	79871644	79872696	+	20.49	Ancient
XLOC_000266	linc-LPHN2-2	TCONS_00002078	lincRNA	chr1	79842763	79871942	+	29180	263	LAST	3	chr1	79871919	79871942	24	24	100	9.12548	9.12548	5	PolyA_SPL	Tigger17b	DNA/TcMar-Tigger	chr1	79871644	79872696	+	20.49	Ancient
XLOC_000266	linc-LPHN2-2	TCONS_00002079	lincRNA	chr1	79868876	79871942	+	3067	261	LAST	3	chr1	79871919	79871942	24	24	100	9.1954	29.1188	5	PolyA_SPL	Tigger17b	DNA/TcMar-Tigger	chr1	79871644	79872696	+	20.49	Ancient
XLOC_000266	linc-LPHN2-2	TCONS_00002079	lincRNA	chr1	79868876	79871942	+	3067	261	FIRST	1	chr1	79868876	79868927	52	52	100	19.9234	29.1188	5	TSS_SPL	AluJr4	SINE/Alu	chr1	79868775	79869089	-	17.33	LineageSpe
XLOC_000267	linc-LPHN2-3	TCONS_00000238	lincRNA	chr1	79789454	79790534	+	1081	342	LAST	2	chr1	79790384	79790534	151	12	7.94702	3.50877	80.4094	1	SPL	L1MEd	LINE/L1	chr1	79790117	79790395	-	28.83	Ancient
XLOC_000267	linc-LPHN2-3	TCONS_00000238	lincRNA	chr1	79789454	79790534	+	1081	342	LAST	2	chr1	79790384	79790534	151	106	70.1987	30.9942	80.4094	1	PolyA	LTR8A	LTR/ERV1	chr1	79790429	79790945	-	16.51	LineageSpe
XLOC_000267	linc-LPHN2-3	TCONS_00000238	lincRNA	chr1	79789454	79790534	+	1081	342	FIRST	1	chr1	79789454	79789644	191	157	82.199	45.9064	80.4094	1	SPL	AluJb	SINE/Alu	chr1	79789488	79789771	+	16.49	LineageSpe
XLOC_000268	linc-LPHN2-1	TCONS_00000239	lincRNA	chr1	81001440	81112473	+	111034	543	MIDDLE	2	chr1	81109910	81110038	129	105	81.3953	19.337	19.337	5	SPL	AluJb	SINE/Alu	chr1	81109716	81110014	-	16.49	LineageSpe
XLOC_000268	linc-LPHN2-1	TCONS_00000240	lincRNA	chr1	81001440	81112473	+	111034	591	MIDDLE	3	chr1	81109910	81110038	129	105	81.3953	17.7665	17.7665	5	SPL	AluJb	SINE/Alu	chr1	81109716	81110014	-	16.49	LineageSpe
XLOC_000268	linc-LPHN2-1	TCONS_00000241	lincRNA	chr1	81106969	81112473	+	5505	473	MIDDLE	2	chr1	81109910	81110038	129	105	81.3953	22.1987	22.1987	5	SPL	AluJb	SINE/Alu	chr1	81109716	81110014	-	16.49	LineageSpe
XLOC_000268	linc-LPHN2-1	TCONS_00002080	lincRNA	chr1	81001445	81109980	+	108536	254	LAST	2	chr1	81109910	81109980	71	71	100	27.9528	27.9528	5	PolyA_SPL	AluJb	SINE/Alu	chr1	81109716	81110014	-	16.49	LineageSpe
XLOC_000269	linc-PRKACB-4	TCONS_00000242	lincRNA	chr1	83368866	83632498	+	263633	1712	MIDDLE	3	chr1	83457543	83457663	121	25	20.6612	1.46028	50.8178	2	SPL	MIRb	SINE/MIR	chr1	83457639	83457758	-	29.76	Ancient
XLOC_000269	linc-PRKACB-4	TCONS_00000242	lincRNA	chr1	83368866	83632498	+	263633	1712	LAST	11	chr1	83632387	83632498	112	112	100	6.54206	50.8178	2	PolyA_SPL	L1MC1	LINE/L1	chr1	83631863	83632790	-	16.34	Ancient
XLOC_000269	linc-PRKACB-4	TCONS_00000242	lincRNA	chr1	83368866	83632498	+	263633	1712	MIDDLE	9	chr1	83562548	83562660	113	64	56.6372	3.73832	50.8178	2	SPL	MIRb	SINE/MIR	chr1	83562597	83562735	+	29.76	Ancient
XLOC_000269	linc-PRKACB-4	TCONS_00000242	lincRNA	chr1	83368866	83632498	+	263633	1712	MIDDLE	2	chr1	83373151	83373265	115	115	100	6.71729	50.8178	2	Both_SPL	MLT1B	LTR/ERVL-MaLR	chr1	83373138	83373323	+	18.85	Ancient
XLOC_000269	linc-PRKACB-4	TCONS_00000242	lincRNA	chr1	83368866	83632498	+	263633	1712	MIDDLE	6	chr1	83541824	83541907	84	84	100	4.90654	50.8178	2	Both_SPL	MLT1I	LTR/ERVL-MaLR	chr1	83541817	83541991	+	29.11	Ancient
XLOC_000269	linc-PRKACB-4	TCONS_00000242	lincRNA	chr1	83368866	83632498	+	263633	1712	MIDDLE	10	chr1	83626289	83626349	61	61	100	3.56308	50.8178	2	Both_SPL	MIRb	SINE/MIR	chr1	83626169	83626416	-	29.76	Ancient
XLOC_000269	linc-PRKACB-4	TCONS_00000242	lincRNA	chr1	83368866	83632498	+	263633	1712	MIDDLE	4	chr1	83462398	83462459	62	62	100	3.6215	50.8178	2	Both_SPL	Tigger2a	DNA/TcMar-Tigger	chr1	83462286	83462699	+	15.85	LineageSpe
XLOC_000269	linc-PRKACB-4	TCONS_00000242	lincRNA	chr1	83368866	83632498	+	263633	1712	MIDDLE	5	chr1	83463156	83463272	117	117	100	6.83411	50.8178	2	Both_SPL	MLT1H	LTR/ERVL-MaLR	chr1	83462942	83463439	+	26.7	Ancient
XLOC_000269	linc-PRKACB-4	TCONS_00000242	lincRNA	chr1	83368866	83632498	+	263633	1712	FIRST	1	chr1	83368866	83369506	641	58	9.04836	3.38785	50.8178	2	TSS	MIR3	SINE/MIR	chr1	83368817	83368923	-	29.77	Ancient
XLOC_000269	linc-PRKACB-4	TCONS_00000242	lincRNA	chr1	83368866	83632498	+	263633	1712	FIRST	1	chr1	83368866	83369506	641	172	26.8331	10.0467	50.8178	2	exonized	MIR	SINE/MIR	chr1	83369004	83369175	+	27.84	Ancient
XLOC_000269	linc-PRKACB-4	TCONS_00000243	lincRNA	chr1	83373245	83463244	+	90000	338	FIRST	1	chr1	83373245	83373265	21	21	100	6.21302	50.8876	2	TSS_SPL	MLT1B	LTR/ERVL-MaLR	chr1	83373138	83373323	+	18.85	Ancient
XLOC_000269	linc-PRKACB-4	TCONS_00000243	lincRNA	chr1	83373245	83463244	+	90000	338	LAST	4	chr1	83463156	83463244	89	89	100	26.3314	50.8876	2	PolyA_SPL	MLT1H	LTR/ERVL-MaLR	chr1	83462942	83463439	+	26.7	Ancient
XLOC_000269	linc-PRKACB-4	TCONS_00000243	lincRNA	chr1	83373245	83463244	+	90000	338	MIDDLE	3	chr1	83462398	83462459	62	62	100	18.3432	50.8876	2	Both_SPL	Tigger2a	DNA/TcMar-Tigger	chr1	83462286	83462699	+	15.85	LineageSpe
XLOC_000271	linc-PRKACB-2	TCONS_00001008	lincRNA	chr1	83982445	84039951	+	57507	617	LAST	3	chr1	84039503	84039951	449	94	20.9354	15.235	35.8185	1	exonized	MER101B	LTR/ERV1	chr1	84039538	84039631	+	20.84	Ancient
XLOC_000271	linc-PRKACB-2	TCONS_00001008	lincRNA	chr1	83982445	84039951	+	57507	617	MIDDLE	2	chr1	84006233	84006314	82	82	100	13.2901	35.8185	1	Both_SPL	L2a	LINE/L2	chr1	84005646	84006908	+	29.37	Ancient
XLOC_000271	linc-PRKACB-2	TCONS_00001008	lincRNA	chr1	83982445	84039951	+	57507	617	LAST	3	chr1	84039503	84039951	449	45	10.0223	7.29335	35.8185	1	exonized	MER101B	LTR/ERV1	chr1	84039797	84039841	+	20.84	Ancient
XLOC_000274	linc-WDR63-1	TCONS_00001009	lincRNA	chr1	85463022	85463597	+	576	479	LAST	2	chr1	85463140	85463597	458	124	27.0742	25.8873	25.8873	1	PolyA	FRAM	SINE/Alu	chr1	85463474	85463607	-	18.8	LineageSpe
XLOC_000276	linc-CYR61-1	TCONS_00001011	lincRNA	chr1	85691288	85710928	+	19641	468	LAST	2	chr1	85710525	85710928	404	76	18.8119	16.2393	16.2393	1	exonized	L3b	LINE/CR1	chr1	85710679	85710754	+	32.67	Ancient
XLOC_000278	linc-CLCA2-2	TCONS_00001012	lincRNA	chr1	86093302	86094050	+	749	437	LAST	2	chr1	86093804	86094050	247	106	42.915	24.2563	24.2563	1	PolyA	AluSx3	SINE/Alu	chr1	86093945	86094249	-	11.23	LineageSpe
XLOC_000282	linc-GBP6-5	TCONS_00001017	lincRNA	chr1	89500494	89501303	+	810	396	LAST	2	chr1	89500940	89501303	364	227	62.3626	57.3232	65.404	1	PolyA	L2a	LINE/L2	chr1	89501077	89501488	+	29.37	Ancient
XLOC_000282	linc-GBP6-5	TCONS_00001017	lincRNA	chr1	89500494	89501303	+	810	396	FIRST	1	chr1	89500494	89500525	32	32	100	8.08081	65.404	1	TSS_SPL	Arthur1	DNA/hAT-Tip100	chr1	89500474	89500644	+	23.75	Ancient
XLOC_000283	linc-GBP6-4	TCONS_00001018	lincRNA	chr1	89510013	89512879	+	2867	896	LAST	2	chr1	89512542	89512879	338	144	42.6036	16.0714	89.5089	1	SPL	L2	LINE/L2	chr1	89512217	89512685	-	32.38	Ancient
XLOC_000283	linc-GBP6-4	TCONS_00001018	lincRNA	chr1	89510013	89512879	+	2867	896	LAST	2	chr1	89512542	89512879	338	100	29.5858	11.1607	89.5089	1	exonized	MIRb	SINE/MIR	chr1	89512716	89512815	+	29.76	Ancient
XLOC_000283	linc-GBP6-4	TCONS_00001018	lincRNA	chr1	89510013	89512879	+	2867	896	FIRST	1	chr1	89510013	89510570	558	558	100	62.2768	89.5089	1	TSS_SPL	L1ME3A	LINE/L1	chr1	89509965	89510832	+	25.23	Ancient
XLOC_000291	linc-LRRC8D-2	TCONS_00001024	lincRNA	chr1	90251627	90253148	+	1522	793	LAST	2	chr1	90253130	90253148	19	19	100	2.39596	54.9811	1	PolyA_SPL	MER44B	DNA/TcMar-Tigger	chr1	90252747	90253282	-	18.75	Ancient
XLOC_000291	linc-LRRC8D-2	TCONS_00001024	lincRNA	chr1	90251627	90253148	+	1522	793	FIRST	1	chr1	90251627	90252400	774	226	29.199	28.4994	54.9811	1	TSS	AluSc	SINE/Alu	chr1	90251549	90251852	+	9.72	LineageSpe
XLOC_000291	linc-LRRC8D-2	TCONS_00001024	lincRNA	chr1	90251627	90253148	+	1522	793	FIRST	1	chr1	90251627	90252400	774	191	24.677	24.0858	54.9811	1	SPL	MLT1J	LTR/ERVL-MaLR	chr1	90252210	90252691	-	28.52	Ancient
XLOC_000294	linc-DR1-1	TCONS_00001027	lincRNA	chr1	93795119	93805355	+	10237	9327	FIRST	1	chr1	93795119	93796358	1240	15	1.20968	0.160823	42.586	2	TSS	MIRb	SINE/MIR	chr1	93794967	93795133	+	29.76	Ancient
XLOC_000294	linc-DR1-1	TCONS_00001027	lincRNA	chr1	93795119	93805355	+	10237	9327	LAST	2	chr1	93797269	93805355	8087	70	0.865587	0.750509	42.586	2	exonized	MLT1H	LTR/ERVL-MaLR	chr1	93804178	93804247	+	26.7	Ancient
XLOC_000294	linc-DR1-1	TCONS_00001027	lincRNA	chr1	93795119	93805355	+	10237	9327	FIRST	1	chr1	93795119	93796358	1240	143	11.5323	1.53318	42.586	2	exonized	MLT1J2	LTR/ERVL-MaLR	chr1	93795823	93795965	+	28.4	Ancient
XLOC_000294	linc-DR1-1	TCONS_00001027	lincRNA	chr1	93795119	93805355	+	10237	9327	LAST	2	chr1	93797269	93805355	8087	14	0.173117	0.150102	42.586	2	SPL	MLT1M	LTR/ERVL-MaLR	chr1	93797202	93797282	-	29.24	Ancient
XLOC_000294	linc-DR1-1	TCONS_00001027	lincRNA	chr1	93795119	93805355	+	10237	9327	LAST	2	chr1	93797269	93805355	8087	34	0.420428	0.364533	42.586	2	exonized	L1ME4a	LINE/L1	chr1	93798712	93798745	-	27.76	Ancient
XLOC_000294	linc-DR1-1	TCONS_00001027	lincRNA	chr1	93795119	93805355	+	10237	9327	LAST	2	chr1	93797269	93805355	8087	159	1.96612	1.70473	42.586	2	exonized	L1ME4a	LINE/L1	chr1	93799046	93799204	-	27.76	Ancient
XLOC_000294	linc-DR1-1	TCONS_00001027	lincRNA	chr1	93795119	93805355	+	10237	9327	FIRST	1	chr1	93795119	93796358	1240	183	14.7581	1.96205	42.586	2	exonized	AluJr	SINE/Alu	chr1	93795607	93795789	-	16.75	LineageSpe
XLOC_000294	linc-DR1-1	TCONS_00001027	lincRNA	chr1	93795119	93805355	+	10237	9327	LAST	2	chr1	93797269	93805355	8087	75	0.927414	0.804117	42.586	2	exonized	MIRc	SINE/MIR	chr1	93802793	93802867	-	29.57	Ancient
XLOC_000294	linc-DR1-1	TCONS_00001027	lincRNA	chr1	93795119	93805355	+	10237	9327	LAST	2	chr1	93797269	93805355	8087	152	1.87956	1.62968	42.586	2	exonized	MLT1H	LTR/ERVL-MaLR	chr1	93805005	93805156	+	26.7	Ancient
XLOC_000294	linc-DR1-1	TCONS_00001027	lincRNA	chr1	93795119	93805355	+	10237	9327	LAST	2	chr1	93797269	93805355	8087	122	1.50859	1.30803	42.586	2	exonized	MIR	SINE/MIR	chr1	93802957	93803078	+	27.84	Ancient
XLOC_000294	linc-DR1-1	TCONS_00001027	lincRNA	chr1	93795119	93805355	+	10237	9327	LAST	2	chr1	93797269	93805355	8087	337	4.16718	3.61317	42.586	2	exonized	AluJr	SINE/Alu	chr1	93799604	93799940	-	16.75	LineageSpe
XLOC_000294	linc-DR1-1	TCONS_00001027	lincRNA	chr1	93795119	93805355	+	10237	9327	LAST	2	chr1	93797269	93805355	8087	127	1.57042	1.36164	42.586	2	exonized	L2b	LINE/L2	chr1	93797496	93797622	+	32.38	Ancient
XLOC_000294	linc-DR1-1	TCONS_00001027	lincRNA	chr1	93795119	93805355	+	10237	9327	FIRST	1	chr1	93795119	93796358	1240	215	17.3387	2.30514	42.586	2	SPL	Mam_R4	LINE/Dong-R4	chr1	93796144	93796500	-	31.34	Ancient
XLOC_000294	linc-DR1-1	TCONS_00001027	lincRNA	chr1	93795119	93805355	+	10237	9327	FIRST	1	chr1	93795119	93796358	1240	79	6.37097	0.847003	42.586	2	exonized	L1M5	LINE/L1	chr1	93795229	93795307	-	28.23	Ancient
XLOC_000294	linc-DR1-1	TCONS_00001027	lincRNA	chr1	93795119	93805355	+	10237	9327	LAST	2	chr1	93797269	93805355	8087	226	2.79461	2.42307	42.586	2	exonized	L1ME4a	LINE/L1	chr1	93799332	93799557	-	27.76	Ancient
XLOC_000294	linc-DR1-1	TCONS_00001027	lincRNA	chr1	93795119	93805355	+	10237	9327	LAST	2	chr1	93797269	93805355	8087	122	1.50859	1.30803	42.586	2	exonized	MER85	DNA/PiggyBac	chr1	93801646	93801767	-	7.25	LineageSpe
XLOC_000294	linc-DR1-1	TCONS_00001027	lincRNA	chr1	93795119	93805355	+	10237	9327	LAST	2	chr1	93797269	93805355	8087	153	1.89193	1.6404	42.586	2	exonized	FAM	SINE/Alu	chr1	93800273	93800425	-	18.96	Ancient
XLOC_000294	linc-DR1-1	TCONS_00001027	lincRNA	chr1	93795119	93805355	+	10237	9327	LAST	2	chr1	93797269	93805355	8087	318	3.93224	3.40946	42.586	2	exonized	L2b	LINE/L2	chr1	93804558	93804875	+	32.38	Ancient
XLOC_000294	linc-DR1-1	TCONS_00001027	lincRNA	chr1	93795119	93805355	+	10237	9327	FIRST	1	chr1	93795119	93796358	1240	298	24.0323	3.19503	42.586	2	exonized	AluSx1	SINE/Alu	chr1	93795309	93795606	-	11.14	LineageSpe
XLOC_000294	linc-DR1-1	TCONS_00001027	lincRNA	chr1	93795119	93805355	+	10237	9327	LAST	2	chr1	93797269	93805355	8087	300	3.70966	3.21647	42.586	2	exonized	AluSc	SINE/Alu	chr1	93798746	93799045	+	9.72	LineageSpe
XLOC_000294	linc-DR1-1	TCONS_00001027	lincRNA	chr1	93795119	93805355	+	10237	9327	LAST	2	chr1	93797269	93805355	8087	238	2.94299	2.55173	42.586	2	exonized	AluJr	SINE/Alu	chr1	93803417	93803654	-	16.75	LineageSpe
XLOC_000294	linc-DR1-1	TCONS_00001027	lincRNA	chr1	93795119	93805355	+	10237	9327	LAST	2	chr1	93797269	93805355	8087	290	3.586	3.10925	42.586	2	exonized	AluYc	SINE/Alu	chr1	93802494	93802783	-	7.35	LineageSpe
XLOC_000294	linc-DR1-1	TCONS_00001027	lincRNA	chr1	93795119	93805355	+	10237	9327	LAST	2	chr1	93797269	93805355	8087	302	3.73439	3.23791	42.586	2	exonized	AluSg	SINE/Alu	chr1	93800889	93801190	+	10.37	LineageSpe
XLOC_000294	linc-DR1-1	TCONS_00002090	lincRNA	chr1	93797324	93798755	+	1432	207	LAST	2	chr1	93798626	93798755	130	34	26.1538	16.4251	16.4251	2	exonized	L1ME4a	LINE/L1	chr1	93798712	93798745	-	27.76	Ancient
XLOC_000301	linc-ABCD3-1	TCONS_00001035	lincRNA	chr1	94794157	94800425	+	6269	510	LAST	3	chr1	94800068	94800425	358	11	3.07263	2.15686	2.15686	4	PolyA	MIRb	SINE/MIR	chr1	94800415	94800557	+	29.76	Ancient
XLOC_000301	linc-ABCD3-1	TCONS_00001036	lincRNA	chr1	94798875	94808287	+	9413	405	LAST	3	chr1	94808261	94808287	27	27	100	6.66667	6.66667	4	PolyA_SPL	LTR33	LTR/ERVL	chr1	94807942	94808374	+	29.01	Ancient
XLOC_000303	linc-SLC44A3-1	TCONS_00001038	lincRNA	chr1	95143554	95155440	+	11887	2179	LAST	3	chr1	95153449	95155440	1992	277	13.9056	12.7123	48.7838	3	exonized	AluSg	SINE/Alu	chr1	95154964	95155240	+	10.37	LineageSpe
XLOC_000303	linc-SLC44A3-1	TCONS_00001038	lincRNA	chr1	95143554	95155440	+	11887	2179	LAST	3	chr1	95153449	95155440	1992	313	15.7129	14.3644	48.7838	3	exonized	AluY	SINE/Alu	chr1	95153607	95153919	+	6.92	LineageSpe
XLOC_000303	linc-SLC44A3-1	TCONS_00001038	lincRNA	chr1	95143554	95155440	+	11887	2179	LAST	3	chr1	95153449	95155440	1992	473	23.745	21.7072	48.7838	3	exonized	LTR33	LTR/ERVL	chr1	95154104	95154576	-	29.01	Ancient
XLOC_000303	linc-SLC44A3-1	TCONS_00002094	lincRNA	chr1	95148857	95153875	+	5019	747	LAST	2	chr1	95153449	95153875	427	269	62.9977	36.0107	36.0107	3	PolyA	AluY	SINE/Alu	chr1	95153607	95153919	+	6.92	LineageSpe
XLOC_000303	linc-SLC44A3-1	TCONS_00002095	lincRNA	chr1	95149856	95153875	+	4020	1191	LAST	2	chr1	95153449	95153875	427	269	62.9977	22.5861	32.8296	3	PolyA	AluY	SINE/Alu	chr1	95153607	95153919	+	6.92	LineageSpe
XLOC_000303	linc-SLC44A3-1	TCONS_00002095	lincRNA	chr1	95149856	95153875	+	4020	1191	FIRST	1	chr1	95149856	95150619	764	122	15.9686	10.2435	32.8296	3	exonized	MIRb	SINE/MIR	chr1	95150062	95150183	+	29.76	Ancient
XLOC_000304	linc-TMEM56-3	TCONS_00000006	lincRNA	chr1	95393584	95428825	+	35242	951	LAST	4	chr1	95428481	95428825	345	14	4.05797	1.47213	9.56887	9	PolyA	MIR	SINE/MIR	chr1	95428812	95429035	-	27.84	Ancient
XLOC_000304	linc-TMEM56-3	TCONS_00000006	lincRNA	chr1	95393584	95428825	+	35242	951	MIDDLE	2	chr1	95397428	95397541	114	77	67.5439	8.09674	9.56887	9	SPL	MER41A	LTR/ERV1	chr1	95396966	95397504	+	9.01	LineageSpe
XLOC_000304	linc-TMEM56-3	TCONS_00000249	lincRNA	chr1	95393122	95428826	+	35705	518	LAST	4	chr1	95428535	95428826	292	15	5.13699	2.89575	17.7606	9	PolyA	MIR	SINE/MIR	chr1	95428812	95429035	-	27.84	Ancient
XLOC_000304	linc-TMEM56-3	TCONS_00000249	lincRNA	chr1	95393122	95428826	+	35705	518	MIDDLE	3	chr1	95397428	95397541	114	77	67.5439	14.8649	17.7606	9	SPL	MER41A	LTR/ERV1	chr1	95396966	95397504	+	9.01	LineageSpe
XLOC_000304	linc-TMEM56-3	TCONS_00000250	lincRNA	chr1	95426881	95428826	+	1946	401	LAST	2	chr1	95428535	95428826	292	15	5.13699	3.74065	3.74065	9	PolyA	MIR	SINE/MIR	chr1	95428812	95429035	-	27.84	Ancient
XLOC_000304	linc-TMEM56-3	TCONS_00001039	lincRNA	chr1	95392854	95433017	+	40164	1635	MIDDLE	2	chr1	95397428	95397541	114	77	67.5439	4.70948	4.70948	9	SPL	MER41A	LTR/ERV1	chr1	95396966	95397504	+	9.01	LineageSpe
XLOC_000304	linc-TMEM56-3	TCONS_00001040	lincRNA	chr1	95392967	95429158	+	36192	1730	LAST	3	chr1	95428535	95429158	624	224	35.8974	12.948	17.3988	9	exonized	MIR	SINE/MIR	chr1	95428812	95429035	-	27.84	Ancient
XLOC_000304	linc-TMEM56-3	TCONS_00001040	lincRNA	chr1	95392967	95429158	+	36192	1730	MIDDLE	2	chr1	95397428	95397541	114	77	67.5439	4.45087	17.3988	9	SPL	MER41A	LTR/ERV1	chr1	95396966	95397504	+	9.01	LineageSpe
XLOC_000304	linc-TMEM56-3	TCONS_00001041	lincRNA	chr1	95392967	95429158	+	36192	1847	LAST	4	chr1	95428535	95429158	624	224	35.8974	12.1278	16.2967	9	exonized	MIR	SINE/MIR	chr1	95428812	95429035	-	27.84	Ancient
XLOC_000304	linc-TMEM56-3	TCONS_00001041	lincRNA	chr1	95392967	95429158	+	36192	1847	MIDDLE	2	chr1	95397428	95397541	114	77	67.5439	4.16892	16.2967	9	SPL	MER41A	LTR/ERV1	chr1	95396966	95397504	+	9.01	LineageSpe
XLOC_000304	linc-TMEM56-3	TCONS_00001042	lincRNA	chr1	95392967	95429158	+	36192	1827	MIDDLE	2	chr1	95397428	95397541	114	77	67.5439	4.21456	21.7843	9	SPL	MER41A	LTR/ERV1	chr1	95396966	95397504	+	9.01	LineageSpe
XLOC_000304	linc-TMEM56-3	TCONS_00001042	lincRNA	chr1	95392967	95429158	+	36192	1827	LAST	4	chr1	95428535	95429158	624	224	35.8974	12.2605	21.7843	9	exonized	MIR	SINE/MIR	chr1	95428812	95429035	-	27.84	Ancient
XLOC_000304	linc-TMEM56-3	TCONS_00001042	lincRNA	chr1	95392967	95429158	+	36192	1827	MIDDLE	3	chr1	95405385	95405481	97	97	100	5.30925	21.7843	9	Both_SPL	Tigger2a	DNA/TcMar-Tigger	chr1	95405295	95405736	+	15.85	LineageSpe
XLOC_000304	linc-TMEM56-3	TCONS_00001043	lincRNA	chr1	95392981	95428803	+	35823	1346	MIDDLE	2	chr1	95397428	95397541	114	77	67.5439	5.72065	5.72065	9	SPL	MER41A	LTR/ERV1	chr1	95396966	95397504	+	9.01	LineageSpe
XLOC_000307	linc-PTBP2-7	TCONS_00001046	lincRNA	chr1	95749339	95753228	+	3890	1146	LAST	2	chr1	95752179	95753228	1050	232	22.0952	20.2443	25.9162	1	PolyA	Charlie4a	DNA/hAT-Charlie	chr1	95752997	95753398	+	21.91	Ancient
XLOC_000307	linc-PTBP2-7	TCONS_00001046	lincRNA	chr1	95749339	95753228	+	3890	1146	FIRST	1	chr1	95749339	95749434	96	65	67.7083	5.6719	25.9162	1	TSS	MIRb	SINE/MIR	chr1	95749290	95749403	+	29.76	Ancient
XLOC_000309	linc-PTBP2-5	TCONS_00000007	lincRNA	chr1	95940293	95944912	+	4620	2755	LAST	4	chr1	95942895	95944912	2018	141	6.98712	5.11797	73.2486	1	SPL	THE1B	LTR/ERVL-MaLR	chr1	95942663	95943035	+	12.8	LineageSpe
XLOC_000309	linc-PTBP2-5	TCONS_00000007	lincRNA	chr1	95940293	95944912	+	4620	2755	LAST	4	chr1	95942895	95944912	2018	322	15.9564	11.6878	73.2486	1	PolyA	THE1B	LTR/ERVL-MaLR	chr1	95944591	95944966	+	12.8	LineageSpe
XLOC_000309	linc-PTBP2-5	TCONS_00000007	lincRNA	chr1	95940293	95944912	+	4620	2755	LAST	4	chr1	95942895	95944912	2018	1555	77.0565	56.4428	73.2486	1	exonized	THE1B-int	LTR/ERVL-MaLR	chr1	95943036	95944590	+	10.66	LineageSpe
XLOC_000311	linc-PTBP2-3	TCONS_00001052	lincRNA	chr1	96282861	96284231	+	1371	245	LAST	2	chr1	96284207	96284231	25	25	100	10.2041	100	1	PolyA_SPL	MLT1J-int	LTR/ERVL-MaLR	chr1	96284145	96284265	-	30.49	Ancient
XLOC_000311	linc-PTBP2-3	TCONS_00001052	lincRNA	chr1	96282861	96284231	+	1371	245	FIRST	1	chr1	96282861	96283080	220	220	100	89.7959	100	1	TSS_SPL	LTR16A2	LTR/ERVL	chr1	96282825	96283286	-	26.82	Ancient
XLOC_000312	linc-PTBP2-2	TCONS_00000256	lincRNA	chr1	96455363	96488422	+	33060	861	MIDDLE	2	chr1	96457959	96458065	107	105	98.1308	12.1951	12.1951	7	SPL	L2a	LINE/L2	chr1	96457487	96458063	-	29.37	Ancient
XLOC_000312	linc-PTBP2-2	TCONS_00000257	lincRNA	chr1	96457624	96488422	+	30799	799	MIDDLE	2	chr1	96457959	96458065	107	105	98.1308	13.1414	20.025	7	SPL	L2a	LINE/L2	chr1	96457487	96458063	-	29.37	Ancient
XLOC_000312	linc-PTBP2-2	TCONS_00000257	lincRNA	chr1	96457624	96488422	+	30799	799	FIRST	1	chr1	96457624	96457678	55	55	100	6.8836	20.025	7	TSS_SPL	L2a	LINE/L2	chr1	96457487	96458063	-	29.37	Ancient
XLOC_000312	linc-PTBP2-2	TCONS_00000258	lincRNA	chr1	96458021	96488436	+	30416	467	FIRST	1	chr1	96458021	96458065	45	43	95.5556	9.20771	9.20771	7	TSS	L2a	LINE/L2	chr1	96457487	96458063	-	29.37	Ancient
XLOC_000312	linc-PTBP2-2	TCONS_00001053	lincRNA	chr1	96457552	96488437	+	30886	773	MIDDLE	2	chr1	96457959	96458065	107	105	98.1308	13.5834	45.0194	7	SPL	L2a	LINE/L2	chr1	96457487	96458063	-	29.37	Ancient
XLOC_000312	linc-PTBP2-2	TCONS_00001053	lincRNA	chr1	96457552	96488437	+	30886	773	FIRST	1	chr1	96457552	96457794	243	243	100	31.436	45.0194	7	TSS_SPL	L2a	LINE/L2	chr1	96457487	96458063	-	29.37	Ancient
XLOC_000312	linc-PTBP2-2	TCONS_00001054	lincRNA	chr1	96457570	96488432	+	30863	979	MIDDLE	2	chr1	96457959	96458065	107	105	98.1308	10.7252	33.7079	7	SPL	L2a	LINE/L2	chr1	96457487	96458063	-	29.37	Ancient
XLOC_000312	linc-PTBP2-2	TCONS_00001054	lincRNA	chr1	96457570	96488432	+	30863	979	FIRST	1	chr1	96457570	96457794	225	225	100	22.9826	33.7079	7	TSS_SPL	L2a	LINE/L2	chr1	96457487	96458063	-	29.37	Ancient
XLOC_000312	linc-PTBP2-2	TCONS_00002102	lincRNA	chr1	96457552	96488437	+	30886	808	MIDDLE	2	chr1	96457922	96458065	144	142	98.6111	17.5743	47.401	7	SPL	L2a	LINE/L2	chr1	96457487	96458063	-	29.37	Ancient
XLOC_000312	linc-PTBP2-2	TCONS_00002102	lincRNA	chr1	96457552	96488437	+	30886	808	FIRST	1	chr1	96457552	96457792	241	241	100	29.8267	47.401	7	TSS_SPL	L2a	LINE/L2	chr1	96457487	96458063	-	29.37	Ancient
XLOC_000316	linc-VCAM1-1	TCONS_00001058	lincRNA	chr1	101121835	101171700	+	49866	2386	LAST	2	chr1	101169841	101171700	1860	516	27.7419	21.6262	35.5407	1	exonized	L1ME5	LINE/L1	chr1	101171170	101171685	-	28.38	Ancient
XLOC_000316	linc-VCAM1-1	TCONS_00001058	lincRNA	chr1	101121835	101171700	+	49866	2386	FIRST	1	chr1	101121835	101122360	526	332	63.1179	13.9145	35.5407	1	exonized	L2c	LINE/L2	chr1	101121950	101122281	-	32.46	Ancient
XLOC_000318	linc-S1PR1-1	TCONS_00001078	lincRNA	chr1	101616109	101630276	+	14168	1145	LAST	3	chr1	101629699	101630276	578	118	20.4152	10.3057	13.4498	4	exonized	AluSx	SINE/Alu	chr1	101629813	101629930	+	11.66	LineageSpe
XLOC_000318	linc-S1PR1-1	TCONS_00001078	lincRNA	chr1	101616109	101630276	+	14168	1145	LAST	3	chr1	101629699	101630276	578	36	6.22837	3.1441	13.4498	4	PolyA	MIRc	SINE/MIR	chr1	101630241	101630299	-	29.57	Ancient
XLOC_000318	linc-S1PR1-1	TCONS_00001079	lincRNA	chr1	101616109	101640009	+	23901	8627	LAST	4	chr1	101632013	101640009	7997	106	1.3255	1.2287	47.502	4	exonized	MIR3	SINE/MIR	chr1	101633649	101633754	+	29.77	Ancient
XLOC_000318	linc-S1PR1-1	TCONS_00001079	lincRNA	chr1	101616109	101640009	+	23901	8627	LAST	4	chr1	101632013	101640009	7997	11	0.137552	0.127507	47.502	4	exonized	Tigger2	DNA/TcMar-Tigger	chr1	101637739	101637749	+	14.59	LineageSpe
XLOC_000318	linc-S1PR1-1	TCONS_00001079	lincRNA	chr1	101616109	101640009	+	23901	8627	LAST	4	chr1	101632013	101640009	7997	62	0.775291	0.718674	47.502	4	exonized	MER50	LTR/ERV1	chr1	101632041	101632102	+	15.84	Ancient
XLOC_000318	linc-S1PR1-1	TCONS_00001079	lincRNA	chr1	101616109	101640009	+	23901	8627	LAST	4	chr1	101632013	101640009	7997	296	3.70139	3.43109	47.502	4	exonized	AluJb	SINE/Alu	chr1	101636002	101636297	-	16.49	LineageSpe
XLOC_000318	linc-S1PR1-1	TCONS_00001079	lincRNA	chr1	101616109	101640009	+	23901	8627	LAST	4	chr1	101632013	101640009	7997	479	5.98975	5.55234	47.502	4	exonized	Tigger2	DNA/TcMar-Tigger	chr1	101638089	101638567	+	14.59	LineageSpe
XLOC_000318	linc-S1PR1-1	TCONS_00001079	lincRNA	chr1	101616109	101640009	+	23901	8627	LAST	4	chr1	101632013	101640009	7997	453	5.66462	5.25096	47.502	4	exonized	MLT1J2	LTR/ERVL-MaLR	chr1	101632180	101632632	+	28.4	Ancient
XLOC_000318	linc-S1PR1-1	TCONS_00001079	lincRNA	chr1	101616109	101640009	+	23901	8627	LAST	4	chr1	101632013	101640009	7997	325	4.06402	3.76724	47.502	4	exonized	AluSx1	SINE/Alu	chr1	101637414	101637738	+	11.14	LineageSpe
XLOC_000318	linc-S1PR1-1	TCONS_00001079	lincRNA	chr1	101616109	101640009	+	23901	8627	LAST	4	chr1	101632013	101640009	7997	268	3.35126	3.10653	47.502	4	PolyA	AluSg7	SINE/Alu	chr1	101639742	101640018	+	9.04	LineageSpe
XLOC_000318	linc-S1PR1-1	TCONS_00001079	lincRNA	chr1	101616109	101640009	+	23901	8627	LAST	4	chr1	101632013	101640009	7997	161	2.01325	1.86623	47.502	4	exonized	Tigger2	DNA/TcMar-Tigger	chr1	101637253	101637413	+	14.59	LineageSpe
XLOC_000318	linc-S1PR1-1	TCONS_00001079	lincRNA	chr1	101616109	101640009	+	23901	8627	LAST	4	chr1	101632013	101640009	7997	307	3.83894	3.5586	47.502	4	exonized	AluSz6	SINE/Alu	chr1	101634219	101634525	-	13.16	LineageSpe
XLOC_000318	linc-S1PR1-1	TCONS_00001079	lincRNA	chr1	101616109	101640009	+	23901	8627	LAST	4	chr1	101632013	101640009	7997	339	4.23909	3.92952	47.502	4	exonized	AluJb	SINE/Alu	chr1	101637750	101638088	+	16.49	LineageSpe
XLOC_000318	linc-S1PR1-1	TCONS_00001079	lincRNA	chr1	101616109	101640009	+	23901	8627	LAST	4	chr1	101632013	101640009	7997	391	4.88933	4.53228	47.502	4	exonized	L1MC1	LINE/L1	chr1	101639346	101639736	+	16.34	Ancient
XLOC_000318	linc-S1PR1-1	TCONS_00001079	lincRNA	chr1	101616109	101640009	+	23901	8627	LAST	4	chr1	101632013	101640009	7997	121	1.51307	1.40257	47.502	4	exonized	MER46C	DNA/TcMar-Tigger	chr1	101635714	101635834	+	25.12	Ancient
XLOC_000318	linc-S1PR1-1	TCONS_00001079	lincRNA	chr1	101616109	101640009	+	23901	8627	LAST	4	chr1	101632013	101640009	7997	779	9.74115	9.02979	47.502	4	exonized	L2a	LINE/L2	chr1	101632814	101633592	+	29.37	Ancient
XLOC_000319	linc-RNPC3-7	TCONS_00000262	lincRNA	chr1	101789393	101842869	+	53477	474	MIDDLE	3	chr1	101811319	101811401	83	83	100	17.5105	50.6329	3	Both_SPL	L1PA16	LINE/L1	chr1	101811296	101811576	-	14.52	LineageSpe
XLOC_000319	linc-RNPC3-7	TCONS_00000262	lincRNA	chr1	101789393	101842869	+	53477	474	MIDDLE	2	chr1	101809395	101809551	157	157	100	33.1224	50.6329	3	Both_SPL	MLT1B	LTR/ERVL-MaLR	chr1	101809207	101809628	+	18.85	Ancient
XLOC_000319	linc-RNPC3-7	TCONS_00000263	lincRNA	chr1	101815605	101855859	+	40255	771	LAST	2	chr1	101855226	101855859	634	38	5.99369	4.92866	18.9364	3	exonized	MIRb	SINE/MIR	chr1	101855336	101855373	+	29.76	Ancient
XLOC_000319	linc-RNPC3-7	TCONS_00000263	lincRNA	chr1	101815605	101855859	+	40255	771	LAST	2	chr1	101855226	101855859	634	108	17.0347	14.0078	18.9364	3	SPL	THE1B	LTR/ERVL-MaLR	chr1	101855214	101855333	-	12.8	LineageSpe
XLOC_000321	linc-RNPC3-5	TCONS_00001081	lincRNA	chr1	102569886	102571564	+	1679	274	LAST	2	chr1	102571334	102571564	231	231	100	84.3066	100	1	PolyA_SPL	LTR49-int	LTR/ERV1	chr1	102570889	102571644	+	19.32	LineageSpe
XLOC_000321	linc-RNPC3-5	TCONS_00001081	lincRNA	chr1	102569886	102571564	+	1679	274	FIRST	1	chr1	102569886	102569928	43	43	100	15.6934	100	1	TSS_SPL	LTR49-int	LTR/ERV1	chr1	102569779	102570559	+	19.32	LineageSpe
XLOC_000322	linc-RNPC3-4	TCONS_00001082	lincRNA	chr1	103142328	103145365	+	3038	210	LAST	3	chr1	103145340	103145365	26	26	100	12.381	46.6667	1	PolyA_SPL	LTR33	LTR/ERVL	chr1	103145178	103145490	-	29.01	Ancient
XLOC_000322	linc-RNPC3-4	TCONS_00001082	lincRNA	chr1	103142328	103145365	+	3038	210	FIRST	1	chr1	103142328	103142403	76	72	94.7368	34.2857	46.6667	1	TSS	THE1B	LTR/ERVL-MaLR	chr1	103142030	103142399	-	12.8	LineageSpe
XLOC_000324	linc-RNPC3-2	TCONS_00000264	lincRNA	chr1	103817769	103828355	+	10587	418	LAST	2	chr1	103827995	103828355	361	63	17.4515	15.0718	15.0718	1	PolyA	MER112	DNA/hAT-Charlie	chr1	103828293	103828459	-	24.02	Ancient
XLOC_000325	linc-RNPC3-1	TCONS_00000265	lincRNA	chr1	103957501	103968087	+	10587	418	LAST	2	chr1	103967727	103968087	361	63	17.4515	15.0718	15.0718	1	PolyA	MER112	DNA/hAT-Charlie	chr1	103968025	103968191	-	24.02	Ancient
XLOC_000329	linc-PRMT6-2	TCONS_00001085	lincRNA	chr1	106993265	107028330	+	35066	473	MIDDLE	2	chr1	107027289	107027376	88	88	100	18.6047	56.4482	3	Both_SPL	HAL1	LINE/L1	chr1	107027265	107027733	+	27.91	Ancient
XLOC_000329	linc-PRMT6-2	TCONS_00001085	lincRNA	chr1	106993265	107028330	+	35066	473	FIRST	1	chr1	106993265	106993494	230	179	77.8261	37.8436	56.4482	3	SPL	LTR101_Mam	LTR/ERVL	chr1	106993316	106993522	+	31.56	Ancient
XLOC_000329	linc-PRMT6-2	TCONS_00001086	lincRNA	chr1	106993298	106995113	+	1816	626	LAST	3	chr1	106994835	106995113	279	279	100	44.5687	97.1246	3	PolyA_SPL	ERVL-E-int	LTR/ERVL	chr1	106994331	106996305	-	30.69	Ancient
XLOC_000329	linc-PRMT6-2	TCONS_00001086	lincRNA	chr1	106993298	106995113	+	1816	626	FIRST	1	chr1	106993298	106993494	197	179	90.8629	28.5942	97.1246	3	SPL	LTR101_Mam	LTR/ERVL	chr1	106993316	106993522	+	31.56	Ancient
XLOC_000329	linc-PRMT6-2	TCONS_00001086	lincRNA	chr1	106993298	106995113	+	1816	626	MIDDLE	2	chr1	106994578	106994727	150	150	100	23.9617	97.1246	3	Both_SPL	ERVL-E-int	LTR/ERVL	chr1	106994331	106996305	-	30.69	Ancient
XLOC_000329	linc-PRMT6-2	TCONS_00002109	lincRNA	chr1	106993298	106994678	+	1381	298	LAST	2	chr1	106994578	106994678	101	101	100	33.8926	93.9597	3	PolyA_SPL	ERVL-E-int	LTR/ERVL	chr1	106994331	106996305	-	30.69	Ancient
XLOC_000329	linc-PRMT6-2	TCONS_00002109	lincRNA	chr1	106993298	106994678	+	1381	298	FIRST	1	chr1	106993298	106993494	197	179	90.8629	60.0671	93.9597	3	SPL	LTR101_Mam	LTR/ERVL	chr1	106993316	106993522	+	31.56	Ancient
XLOC_000332	linc-NBPF6-2	TCONS_00001088	lincRNA	chr1	108593042	108594976	+	1935	360	LAST	2	chr1	108594933	108594976	44	44	100	12.2222	12.2222	1	PolyA_SPL	L2a	LINE/L2	chr1	108594872	108595560	-	29.37	Ancient
XLOC_000336	linc-SARS-1	TCONS_00001091	lincRNA	chr1	109754802	109756393	+	1592	463	FIRST	1	chr1	109754802	109755051	250	205	82	44.2765	44.2765	1	SPL	MER21C	LTR/ERVL	chr1	109754847	109755606	-	22.29	Ancient
XLOC_000337	linc-AMPD2-1	TCONS_00000270	lincRNA	chr1	110138847	110140403	+	1557	596	LAST	2	chr1	110139982	110140403	422	92	21.8009	15.4362	24.6644	1	SPL	AluSx1	SINE/Alu	chr1	110139802	110140073	+	11.14	LineageSpe
XLOC_000337	linc-AMPD2-1	TCONS_00000270	lincRNA	chr1	110138847	110140403	+	1557	596	FIRST	1	chr1	110138847	110139020	174	55	31.6092	9.22819	24.6644	1	SPL	AluSz	SINE/Alu	chr1	110138966	110139271	-	12.11	LineageSpe
XLOC_000339	linc-CSF1-1	TCONS_00000271	lincRNA	chr1	110370977	110414058	+	43082	476	LAST	4	chr1	110413990	110414058	69	69	100	14.4958	62.1849	1	PolyA_SPL	MLT1D	LTR/ERVL-MaLR	chr1	110413980	110414451	+	21.73	Ancient
XLOC_000339	linc-CSF1-1	TCONS_00000271	lincRNA	chr1	110370977	110414058	+	43082	476	MIDDLE	3	chr1	110375922	110376037	116	116	100	24.3697	62.1849	1	Both_SPL	HUERS-P1-int	LTR/ERV1	chr1	110374923	110376478	+	12.09	LineageSpe
XLOC_000339	linc-CSF1-1	TCONS_00000271	lincRNA	chr1	110370977	110414058	+	43082	476	MIDDLE	2	chr1	110371559	110371752	194	111	57.2165	23.3193	62.1849	1	SPL	MIRc	SINE/MIR	chr1	110371642	110371891	+	29.57	Ancient
XLOC_000340	linc-UBL4B-1	TCONS_00001092	lincRNA	chr1	110624852	110652861	+	28010	1561	LAST	4	chr1	110652227	110652861	635	98	15.4331	6.27803	33.1198	4	SPL	FLAM_A	SINE/Alu	chr1	110652200	110652324	-	18.67	LineageSpe
XLOC_000340	linc-UBL4B-1	TCONS_00001092	lincRNA	chr1	110624852	110652861	+	28010	1561	LAST	4	chr1	110652227	110652861	635	300	47.2441	19.2184	33.1198	4	exonized	L2b	LINE/L2	chr1	110652462	110652761	-	32.38	Ancient
XLOC_000340	linc-UBL4B-1	TCONS_00001092	lincRNA	chr1	110624852	110652861	+	28010	1561	MIDDLE	3	chr1	110651921	110652039	119	119	100	7.62332	33.1198	4	Both_SPL	L2b	LINE/L2	chr1	110651909	110652145	-	32.38	Ancient
XLOC_000341	linc-RBM15-1	TCONS_00000272	lincRNA	chr1	110825156	110825722	+	567	221	LAST	2	chr1	110825623	110825722	100	100	100	45.2489	45.2489	1	PolyA_SPL	MSTB2	LTR/ERVL-MaLR	chr1	110825532	110825951	-	18.82	LineageSpe
XLOC_000346	linc-CTTNBP2NL-1	TCONS_00001103	lincRNA	chr1	112549543	112550756	+	1214	406	LAST	2	chr1	112550530	112550756	227	64	28.1938	15.7635	15.7635	1	PolyA	MIR	SINE/MIR	chr1	112550693	112550895	+	27.84	Ancient
XLOC_000348	linc-LRIG2-1	TCONS_00000274	lincRNA	chr1	113392650	113420493	+	27844	587	LAST	3	chr1	113420352	113420493	142	142	100	24.1908	61.1584	2	PolyA_SPL	MLT1F1	LTR/ERVL-MaLR	chr1	113420342	113420500	+	22.79	Ancient
XLOC_000348	linc-LRIG2-1	TCONS_00000274	lincRNA	chr1	113392650	113420493	+	27844	587	MIDDLE	2	chr1	113419562	113419606	45	45	100	7.6661	61.1584	2	Both_SPL	LTR55	LTR/ERVL?	chr1	113419493	113419765	-	22.6	Ancient
XLOC_000348	linc-LRIG2-1	TCONS_00000274	lincRNA	chr1	113392650	113420493	+	27844	587	FIRST	1	chr1	113392650	113393049	400	172	43	29.3015	61.1584	2	exonized	MIR	SINE/MIR	chr1	113392824	113392995	+	27.84	Ancient
XLOC_000348	linc-LRIG2-1	TCONS_00000275	lincRNA	chr1	113392698	113420489	+	27792	490	LAST	2	chr1	113420352	113420489	138	138	100	28.1633	63.2653	2	PolyA_SPL	MLT1F1	LTR/ERVL-MaLR	chr1	113420342	113420500	+	22.79	Ancient
XLOC_000348	linc-LRIG2-1	TCONS_00000275	lincRNA	chr1	113392698	113420489	+	27792	490	FIRST	1	chr1	113392698	113393049	352	172	48.8636	35.102	63.2653	2	exonized	MIR	SINE/MIR	chr1	113392824	113392995	+	27.84	Ancient
XLOC_000350	linc-MAGI3-1	TCONS_00001109	lincRNA	chr1	113673733	113674746	+	1014	911	FIRST	1	chr1	113673733	113674416	684	124	18.1287	13.6114	13.6114	1	TSS	AluSx1	SINE/Alu	chr1	113673560	113673856	-	11.14	LineageSpe
XLOC_000352	linc-SYCP1-4	TCONS_00000279	lincRNA	chr1	114749049	114804900	+	55852	332	FIRST	1	chr1	114749049	114749307	259	259	100	78.012	78.012	1	TSS_SPL	MLT1F2	LTR/ERVL-MaLR	chr1	114749007	114749503	-	24.38	Ancient
XLOC_000357	linc-VANGL1-2	TCONS_00000280	lincRNA	chr1	115642293	115645279	+	2987	491	LAST	2	chr1	115644869	115645279	411	411	100	83.7067	83.7067	1	PolyA_SPL	L1MEg	LINE/L1	chr1	115644130	115645300	+	27.07	Ancient
XLOC_000358	linc-VANGL1-1	TCONS_00001113	lincRNA	chr1	115724043	115765741	+	41699	1361	LAST	2	chr1	115764419	115765741	1323	311	23.5072	22.8508	30.4188	1	exonized	AluSx3	SINE/Alu	chr1	115764609	115764919	+	11.23	LineageSpe
XLOC_000358	linc-VANGL1-1	TCONS_00001113	lincRNA	chr1	115724043	115765741	+	41699	1361	LAST	2	chr1	115764419	115765741	1323	103	7.78534	7.56796	30.4188	1	exonized	MIR3	SINE/MIR	chr1	115765387	115765489	-	29.77	Ancient
XLOC_000360	linc-SLC22A15-2	TCONS_00000052	lincRNA	chr1	116461997	116468528	+	6532	1395	FIRST	1	chr1	116461997	116462180	184	131	71.1957	9.39068	9.39068	1	SPL	MLT1A0	LTR/ERVL-MaLR	chr1	116462050	116462414	-	19.59	Ancient
XLOC_000361	linc-SLC22A15-1	TCONS_00001115	lincRNA	chr1	116473512	116474136	+	625	294	LAST	2	chr1	116473936	116474136	201	201	100	68.3673	100	1	PolyA_SPL	LTR8	LTR/ERV1	chr1	116473877	116474284	+	14.92	LineageSpe
XLOC_000361	linc-SLC22A15-1	TCONS_00001115	lincRNA	chr1	116473512	116474136	+	625	294	FIRST	1	chr1	116473512	116473604	93	93	100	31.6327	100	1	TSS_SPL	MSTA	LTR/ERVL-MaLR	chr1	116473452	116473876	+	14.8	LineageSpe
XLOC_000364	linc-MAN1A2-1	TCONS_00000283	lincRNA	chr1	117838142	117863958	+	25817	511	LAST	3	chr1	117863746	117863958	213	213	100	41.683	41.683	2	PolyA_SPL	MER39	LTR/ERV1	chr1	117863424	117864105	+	20.25	LineageSpe
XLOC_000364	linc-MAN1A2-1	TCONS_00002143	lincRNA	chr1	117839407	117863955	+	24549	227	LAST	2	chr1	117863746	117863955	210	210	100	92.511	92.511	2	PolyA_SPL	MER39	LTR/ERV1	chr1	117863424	117864105	+	20.25	LineageSpe
XLOC_000367	linc-HAO2-3	TCONS_00001117	lincRNA	chr1	118738866	118749628	+	10763	721	LAST	2	chr1	118749062	118749628	567	176	31.0406	24.4105	45.7698	1	exonized	AluJr	SINE/Alu	chr1	118749283	118749458	+	16.75	LineageSpe
XLOC_000367	linc-HAO2-3	TCONS_00001117	lincRNA	chr1	118738866	118749628	+	10763	721	FIRST	1	chr1	118738866	118739019	154	154	100	21.3592	45.7698	1	TSS_SPL	L1MC3	LINE/L1	chr1	118738547	118739729	-	20.74	Ancient
XLOC_000369	linc-HAO2-2	TCONS_00001129	lincRNA	chr1	119805547	119818393	+	12847	604	LAST	2	chr1	119817811	119818393	583	87	14.9228	14.404	14.404	1	exonized	MER5B	DNA/hAT-Charlie	chr1	119817811	119817897	-	26.08	Ancient
XLOC_000370	linc-HAO2-1	TCONS_00000287	lincRNA	chr1	119870799	119873438	+	2640	442	FIRST	1	chr1	119870799	119870910	112	98	87.5	22.1719	22.1719	1	SPL	MamGypLTR3	LTR/Gypsy	chr1	119870813	119870962	+	30.79	Ancient
XLOC_000373	linc-FAM72B-1	TCONS_00001131	lincRNA	chr1	120612586	120638073	+	25488	699	LAST	2	chr1	120637415	120638073	659	251	38.088	35.9084	50.6438	1	exonized	L5	LINE/RTE-X	chr1	120637683	120637933	+	29.24	Ancient
XLOC_000373	linc-FAM72B-1	TCONS_00001131	lincRNA	chr1	120612586	120638073	+	25488	699	LAST	2	chr1	120637415	120638073	659	103	15.6297	14.7353	50.6438	1	PolyA	MIR	SINE/MIR	chr1	120637971	120638181	+	27.84	Ancient
XLOC_000375	linc-NBPF9-9	TCONS_00000289	lincRNA	chr1	121138614	121204983	+	66370	3662	LAST	2	chr1	121201873	121204983	3111	136	4.37158	3.71382	30.6117	4	exonized	L2a	LINE/L2	chr1	121203483	121203618	+	29.37	Ancient
XLOC_000375	linc-NBPF9-9	TCONS_00000289	lincRNA	chr1	121138614	121204983	+	66370	3662	LAST	2	chr1	121201873	121204983	3111	64	2.05722	1.74768	30.6117	4	exonized	MIRc	SINE/MIR	chr1	121203192	121203255	-	29.57	Ancient
XLOC_000375	linc-NBPF9-9	TCONS_00000289	lincRNA	chr1	121138614	121204983	+	66370	3662	LAST	2	chr1	121201873	121204983	3111	183	5.88235	4.99727	30.6117	4	exonized	MIR	SINE/MIR	chr1	121203273	121203455	+	27.84	Ancient
XLOC_000375	linc-NBPF9-9	TCONS_00000289	lincRNA	chr1	121138614	121204983	+	66370	3662	LAST	2	chr1	121201873	121204983	3111	235	7.55384	6.41726	30.6117	4	exonized	MIR	SINE/MIR	chr1	121204721	121204955	-	27.84	Ancient
XLOC_000375	linc-NBPF9-9	TCONS_00000289	lincRNA	chr1	121138614	121204983	+	66370	3662	LAST	2	chr1	121201873	121204983	3111	384	12.3433	10.4861	30.6117	4	SPL	MLT1J	LTR/ERVL-MaLR	chr1	121201823	121202256	+	28.52	Ancient
XLOC_000375	linc-NBPF9-9	TCONS_00000289	lincRNA	chr1	121138614	121204983	+	66370	3662	LAST	2	chr1	121201873	121204983	3111	119	3.82514	3.24959	30.6117	4	exonized	MLT2F	LTR/ERVL	chr1	121202352	121202470	+	27.09	Ancient
XLOC_000375	linc-NBPF9-9	TCONS_00000290	lincRNA	chr1	121166923	121171134	+	4212	496	FIRST	1	chr1	121166923	121167072	150	120	80	24.1935	85.2823	4	TSS	AluJo	SINE/Alu	chr1	121166716	121167042	-	16.42	LineageSpe
XLOC_000375	linc-NBPF9-9	TCONS_00000290	lincRNA	chr1	121166923	121171134	+	4212	496	LAST	3	chr1	121170890	121171134	245	245	100	49.3952	85.2823	4	PolyA_SPL	AluSc	SINE/Alu	chr1	121170868	121171161	-	9.72	LineageSpe
XLOC_000375	linc-NBPF9-9	TCONS_00000290	lincRNA	chr1	121166923	121171134	+	4212	496	MIDDLE	2	chr1	121169824	121169924	101	58	57.4257	11.6935	85.2823	4	SPL	L1M6	LINE/L1	chr1	121169730	121169881	+	29.9	Ancient
XLOC_000375	linc-NBPF9-9	TCONS_00001132	lincRNA	chr1	121138740	121204974	+	66235	3610	LAST	3	chr1	121201873	121204974	3102	136	4.38427	3.76731	32.1607	4	exonized	L2a	LINE/L2	chr1	121203483	121203618	+	29.37	Ancient
XLOC_000375	linc-NBPF9-9	TCONS_00001132	lincRNA	chr1	121138740	121204974	+	66235	3610	MIDDLE	2	chr1	121169842	121169924	83	40	48.1928	1.10803	32.1607	4	SPL	L1M6	LINE/L1	chr1	121169730	121169881	+	29.9	Ancient
XLOC_000375	linc-NBPF9-9	TCONS_00001132	lincRNA	chr1	121138740	121204974	+	66235	3610	LAST	3	chr1	121201873	121204974	3102	64	2.06319	1.77285	32.1607	4	exonized	MIRc	SINE/MIR	chr1	121203192	121203255	-	29.57	Ancient
XLOC_000375	linc-NBPF9-9	TCONS_00001132	lincRNA	chr1	121138740	121204974	+	66235	3610	LAST	3	chr1	121201873	121204974	3102	183	5.89942	5.06925	32.1607	4	exonized	MIR	SINE/MIR	chr1	121203273	121203455	+	27.84	Ancient
XLOC_000375	linc-NBPF9-9	TCONS_00001132	lincRNA	chr1	121138740	121204974	+	66235	3610	LAST	3	chr1	121201873	121204974	3102	235	7.57576	6.5097	32.1607	4	exonized	MIR	SINE/MIR	chr1	121204721	121204955	-	27.84	Ancient
XLOC_000375	linc-NBPF9-9	TCONS_00001132	lincRNA	chr1	121138740	121204974	+	66235	3610	LAST	3	chr1	121201873	121204974	3102	384	12.3791	10.6371	32.1607	4	SPL	MLT1J	LTR/ERVL-MaLR	chr1	121201823	121202256	+	28.52	Ancient
XLOC_000375	linc-NBPF9-9	TCONS_00001132	lincRNA	chr1	121138740	121204974	+	66235	3610	LAST	3	chr1	121201873	121204974	3102	119	3.83623	3.2964	32.1607	4	exonized	MLT2F	LTR/ERVL	chr1	121202352	121202470	+	27.09	Ancient
XLOC_000375	linc-NBPF9-9	TCONS_00002147	lincRNA	chr1	121169841	121202469	+	32629	681	FIRST	1	chr1	121169841	121169924	84	41	48.8095	6.02056	79.7357	4	TSS	L1M6	LINE/L1	chr1	121169730	121169881	+	29.9	Ancient
XLOC_000375	linc-NBPF9-9	TCONS_00002147	lincRNA	chr1	121169841	121202469	+	32629	681	LAST	2	chr1	121201873	121202469	597	384	64.3216	56.3877	79.7357	4	SPL	MLT1J	LTR/ERVL-MaLR	chr1	121201823	121202256	+	28.52	Ancient
XLOC_000375	linc-NBPF9-9	TCONS_00002147	lincRNA	chr1	121169841	121202469	+	32629	681	LAST	2	chr1	121201873	121202469	597	118	19.7655	17.3275	79.7357	4	PolyA	MLT2F	LTR/ERVL	chr1	121202352	121202470	+	27.09	Ancient
XLOC_000376	linc-NBPF9-8	TCONS_00000291	lincRNA	chr1	142553293	142559170	+	5878	965	MIDDLE	2	chr1	142557333	142557370	38	38	100	3.93782	24.6632	1	Both_SPL	L3	LINE/CR1	chr1	142557319	142557479	+	32.5	Ancient
XLOC_000376	linc-NBPF9-8	TCONS_00000291	lincRNA	chr1	142553293	142559170	+	5878	965	FIRST	1	chr1	142553293	142553496	204	200	98.0392	20.7254	24.6632	1	SPL	MIRb	SINE/MIR	chr1	142553297	142553527	+	29.76	Ancient
XLOC_000377	linc-NBPF9-7	TCONS_00001133	lincRNA	chr1	142618802	142624223	+	5422	356	LAST	4	chr1	142624070	142624223	154	154	100	43.2584	43.2584	7	PolyA_SPL	MER57-int	LTR/ERV1	chr1	142623979	142624374	-	12.95	Ancient
XLOC_000377	linc-NBPF9-7	TCONS_00001136	lincRNA	chr1	142618922	142625251	+	6330	292	LAST	3	chr1	142625059	142625251	193	193	100	66.0959	66.0959	7	PolyA_SPL	MER57-int	LTR/ERV1	chr1	142624367	142625327	-	12.95	Ancient
XLOC_000379	linc-NBPF9-5	TCONS_00000294	lincRNA	chr1	143188828	143189695	+	868	470	FIRST	1	chr1	143188828	143189024	197	197	100	41.9149	41.9149	1	TSS_SPL	L1MC4	LINE/L1	chr1	143188823	143189057	+	25.02	Ancient
XLOC_000382	linc-NBPF9-2	TCONS_00000295	lincRNA	chr1	143498344	143517299	+	18956	362	MIDDLE	3	chr1	143516484	143516584	101	101	100	27.9006	74.0331	1	Both_SPL	L3	LINE/CR1	chr1	143516424	143516758	+	32.5	Ancient
XLOC_000382	linc-NBPF9-2	TCONS_00000295	lincRNA	chr1	143498344	143517299	+	18956	362	FIRST	1	chr1	143498344	143498510	167	167	100	46.1326	74.0331	1	TSS_SPL	LTR16A	LTR/ERVL	chr1	143498335	143498720	-	28.44	Ancient
XLOC_000385	linc-CHD1L-1	TCONS_00000054	lincRNA	chr1	146644350	146646784	+	2435	1571	LAST	2	chr1	146646003	146646784	782	43	5.49872	2.73711	25.0159	2	PolyA	L1ME1	LINE/L1	chr1	146646742	146646935	+	24.03	Ancient
XLOC_000385	linc-CHD1L-1	TCONS_00000054	lincRNA	chr1	146644350	146646784	+	2435	1571	LAST	2	chr1	146646003	146646784	782	71	9.07928	4.51941	25.0159	2	exonized	Tigger19a	DNA/TcMar-Tigger	chr1	146646074	146646144	+	31.56	Ancient
XLOC_000385	linc-CHD1L-1	TCONS_00000054	lincRNA	chr1	146644350	146646784	+	2435	1571	FIRST	1	chr1	146644350	146645138	789	279	35.3612	17.7594	25.0159	2	exonized	AluSc	SINE/Alu	chr1	146644600	146644878	+	9.72	LineageSpe
XLOC_000385	linc-CHD1L-1	TCONS_00002153	lincRNA	chr1	146644893	146648626	+	3734	448	LAST	3	chr1	146648587	146648626	40	40	100	8.92857	24.7768	2	PolyA_SPL	L1MC3	LINE/L1	chr1	146648456	146649436	+	20.74	Ancient
XLOC_000385	linc-CHD1L-1	TCONS_00002153	lincRNA	chr1	146644893	146648626	+	3734	448	MIDDLE	2	chr1	146646003	146646164	162	71	43.8272	15.8482	24.7768	2	exonized	Tigger19a	DNA/TcMar-Tigger	chr1	146646074	146646144	+	31.56	Ancient
XLOC_000387	linc-GJA8-1	TCONS_00000297	lincRNA	chr1	147249700	147261065	+	11366	480	LAST	2	chr1	147260720	147261065	346	117	33.815	24.375	45.625	2	exonized	L3	LINE/CR1	chr1	147260833	147260949	+	32.5	Ancient
XLOC_000387	linc-GJA8-1	TCONS_00000297	lincRNA	chr1	147249700	147261065	+	11366	480	LAST	2	chr1	147260720	147261065	346	102	29.4798	21.25	45.625	2	SPL	MIR	SINE/MIR	chr1	147260622	147260821	-	27.84	Ancient
XLOC_000387	linc-GJA8-1	TCONS_00001139	lincRNA	chr1	147249689	147267415	+	17727	2806	LAST	2	chr1	147264755	147267415	2661	37	1.39045	1.3186	23.5567	2	exonized	L2c	LINE/L2	chr1	147265200	147265236	+	32.46	Ancient
XLOC_000387	linc-GJA8-1	TCONS_00001139	lincRNA	chr1	147249689	147267415	+	17727	2806	LAST	2	chr1	147264755	147267415	2661	70	2.63059	2.49465	23.5567	2	SPL	LTR79	LTR/ERVL	chr1	147264715	147264824	+	28.72	Ancient
XLOC_000387	linc-GJA8-1	TCONS_00001139	lincRNA	chr1	147249689	147267415	+	17727	2806	LAST	2	chr1	147264755	147267415	2661	164	6.1631	5.84462	23.5567	2	exonized	LTR79	LTR/ERVL	chr1	147264860	147265023	+	28.72	Ancient
XLOC_000387	linc-GJA8-1	TCONS_00001139	lincRNA	chr1	147249689	147267415	+	17727	2806	LAST	2	chr1	147264755	147267415	2661	221	8.30515	7.87598	23.5567	2	exonized	MIR	SINE/MIR	chr1	147266253	147266473	+	27.84	Ancient
XLOC_000387	linc-GJA8-1	TCONS_00001139	lincRNA	chr1	147249689	147267415	+	17727	2806	LAST	2	chr1	147264755	147267415	2661	169	6.351	6.02281	23.5567	2	exonized	MIRc	SINE/MIR	chr1	147265030	147265198	-	29.57	Ancient
XLOC_000388	linc-NBPF15-3	TCONS_00000298	lincRNA	chr1	147494090	147498172	+	4083	494	LAST	3	chr1	147498018	147498172	155	155	100	31.3765	61.5385	2	PolyA_SPL	MLT1B	LTR/ERVL-MaLR	chr1	147497821	147498215	+	18.85	Ancient
XLOC_000388	linc-NBPF15-3	TCONS_00000298	lincRNA	chr1	147494090	147498172	+	4083	494	FIRST	1	chr1	147494090	147494238	149	149	100	30.1619	61.5385	2	TSS_SPL	L1MEh	LINE/L1	chr1	147493962	147494496	-	28.12	Ancient
XLOC_000388	linc-NBPF15-3	TCONS_00000299	lincRNA	chr1	147496676	147498172	+	1497	439	LAST	2	chr1	147498018	147498172	155	155	100	35.3075	35.3075	2	PolyA_SPL	MLT1B	LTR/ERVL-MaLR	chr1	147497821	147498215	+	18.85	Ancient
XLOC_000389	linc-NBPF15-2	TCONS_00001140	lincRNA	chr1	148352316	148354746	+	2431	2377	LAST	2	chr1	148352405	148354746	2342	72	3.0743	3.02903	41.1864	1	exonized	L3	LINE/CR1	chr1	148353645	148353716	+	32.5	Ancient
XLOC_000389	linc-NBPF15-2	TCONS_00001140	lincRNA	chr1	148352316	148354746	+	2431	2377	LAST	2	chr1	148352405	148354746	2342	72	3.0743	3.02903	41.1864	1	PolyA	L1ME2z	LINE/L1	chr1	148354675	148355035	+	23.38	Ancient
XLOC_000389	linc-NBPF15-2	TCONS_00001140	lincRNA	chr1	148352316	148354746	+	2431	2377	LAST	2	chr1	148352405	148354746	2342	306	13.0658	12.8734	41.1864	1	exonized	AluSc8	SINE/Alu	chr1	148352861	148353166	-	9.65	LineageSpe
XLOC_000389	linc-NBPF15-2	TCONS_00001140	lincRNA	chr1	148352316	148354746	+	2431	2377	LAST	2	chr1	148352405	148354746	2342	82	3.50128	3.44973	41.1864	1	exonized	L1ME2	LINE/L1	chr1	148353167	148353248	-	24.92	Ancient
XLOC_000389	linc-NBPF15-2	TCONS_00001140	lincRNA	chr1	148352316	148354746	+	2431	2377	LAST	2	chr1	148352405	148354746	2342	447	19.0863	18.8052	41.1864	1	exonized	L1ME2	LINE/L1	chr1	148352414	148352860	-	24.92	Ancient
XLOC_000391	linc-PPIAL4A-6	TCONS_00000300	lincRNA	chr1	148852393	148853717	+	1325	408	LAST	3	chr1	148853529	148853717	189	66	34.9206	16.1765	28.6765	1	exonized	MIR3	SINE/MIR	chr1	148853537	148853602	+	29.77	Ancient
XLOC_000391	linc-PPIAL4A-6	TCONS_00000300	lincRNA	chr1	148852393	148853717	+	1325	408	FIRST	1	chr1	148852393	148852534	142	51	35.9155	12.5	28.6765	1	SPL	MER30B	DNA/hAT-Charlie	chr1	148852484	148852676	+	10.99	LineageSpe
XLOC_000393	linc-PPIAL4A-4	TCONS_00000055	lincRNA	chr1	149230716	149232553	+	1838	1072	LAST	2	chr1	149231540	149232553	1014	511	50.3945	47.6679	58.3022	3	exonized	L1M4c	LINE/L1	chr1	149231916	149232426	-	20.89	Ancient
XLOC_000393	linc-PPIAL4A-4	TCONS_00000055	lincRNA	chr1	149230716	149232553	+	1838	1072	LAST	2	chr1	149231540	149232553	1014	114	11.2426	10.6343	58.3022	3	exonized	L1M5	LINE/L1	chr1	149231782	149231895	-	28.23	Ancient
XLOC_000398	linc-FCGR1A-2	TCONS_00001143	lincRNA	chr1	149616221	149616885	+	665	347	LAST	2	chr1	149616549	149616885	337	102	30.2671	29.3948	29.3948	3	PolyA	L1M5	LINE/L1	chr1	149616784	149616927	-	28.23	Ancient
XLOC_000401	linc-CA14-1	TCONS_00002160	lincRNA	chr1	150134879	150152459	+	17581	337	LAST	4	chr1	150152356	150152459	104	16	15.3846	4.74777	4.74777	2	PolyA	AluSz6	SINE/Alu	chr1	150152444	150152742	-	13.16	LineageSpe
XLOC_000403	linc-ADAMTSL4-1	TCONS_00001146	lincRNA	chr1	150504637	150509813	+	5177	2034	FIRST	1	chr1	150504637	150504869	233	41	17.5966	2.01573	44.7886	2	exonized	MER89	LTR/ERV1	chr1	150504683	150504723	+	20.32	Ancient
XLOC_000403	linc-ADAMTSL4-1	TCONS_00001146	lincRNA	chr1	150504637	150509813	+	5177	2034	FIRST	1	chr1	150504637	150504869	233	46	19.7425	2.26155	44.7886	2	TSS	AluY	SINE/Alu	chr1	150504409	150504682	-	6.92	LineageSpe
XLOC_000403	linc-ADAMTSL4-1	TCONS_00001146	lincRNA	chr1	150504637	150509813	+	5177	2034	LAST	3	chr1	150508143	150509813	1671	264	15.7989	12.9794	44.7886	2	exonized	AluJb	SINE/Alu	chr1	150508986	150509249	+	16.49	LineageSpe
XLOC_000403	linc-ADAMTSL4-1	TCONS_00001146	lincRNA	chr1	150504637	150509813	+	5177	2034	MIDDLE	2	chr1	150505133	150505262	130	130	100	6.39135	44.7886	2	Both_SPL	L2a	LINE/L2	chr1	150505117	150505652	-	29.37	Ancient
XLOC_000403	linc-ADAMTSL4-1	TCONS_00001146	lincRNA	chr1	150504637	150509813	+	5177	2034	LAST	3	chr1	150508143	150509813	1671	148	8.85697	7.2763	44.7886	2	exonized	MIR3	SINE/MIR	chr1	150508836	150508983	+	29.77	Ancient
XLOC_000403	linc-ADAMTSL4-1	TCONS_00001146	lincRNA	chr1	150504637	150509813	+	5177	2034	LAST	3	chr1	150508143	150509813	1671	282	16.8761	13.8643	44.7886	2	exonized	L2b	LINE/L2	chr1	150508436	150508717	-	32.38	Ancient
XLOC_000403	linc-ADAMTSL4-1	TCONS_00002162	lincRNA	chr1	150505133	150509639	+	4507	1627	LAST	2	chr1	150508143	150509639	1497	264	17.6353	16.2262	50.6454	2	exonized	AluJb	SINE/Alu	chr1	150508986	150509249	+	16.49	LineageSpe
XLOC_000403	linc-ADAMTSL4-1	TCONS_00002162	lincRNA	chr1	150505133	150509639	+	4507	1627	FIRST	1	chr1	150505133	150505262	130	130	100	7.99017	50.6454	2	TSS_SPL	L2a	LINE/L2	chr1	150505117	150505652	-	29.37	Ancient
XLOC_000403	linc-ADAMTSL4-1	TCONS_00002162	lincRNA	chr1	150505133	150509639	+	4507	1627	LAST	2	chr1	150508143	150509639	1497	148	9.88644	9.0965	50.6454	2	exonized	MIR3	SINE/MIR	chr1	150508836	150508983	+	29.77	Ancient
XLOC_000403	linc-ADAMTSL4-1	TCONS_00002162	lincRNA	chr1	150505133	150509639	+	4507	1627	LAST	2	chr1	150508143	150509639	1497	282	18.8377	17.3325	50.6454	2	exonized	L2b	LINE/L2	chr1	150508436	150508717	-	32.38	Ancient
XLOC_000412	linc-LELP1-1	TCONS_00000314	lincRNA	chr1	153146994	153164152	+	17159	2254	FIRST	1	chr1	153146994	153147121	128	52	40.625	2.30701	18.4117	1	SPL	MLT1N2	LTR/ERVL-MaLR	chr1	153147070	153147247	-	29.6	Ancient
XLOC_000412	linc-LELP1-1	TCONS_00000314	lincRNA	chr1	153146994	153164152	+	17159	2254	LAST	3	chr1	153162555	153164152	1598	153	9.57447	6.78793	18.4117	1	PolyA	Charlie1	DNA/hAT-Charlie	chr1	153164000	153164211	-	20.62	Ancient
XLOC_000412	linc-LELP1-1	TCONS_00000314	lincRNA	chr1	153146994	153164152	+	17159	2254	MIDDLE	2	chr1	153148589	153149116	528	79	14.9621	3.50488	18.4117	1	exonized	MIR3	SINE/MIR	chr1	153148683	153148761	+	29.77	Ancient
XLOC_000412	linc-LELP1-1	TCONS_00000314	lincRNA	chr1	153146994	153164152	+	17159	2254	LAST	3	chr1	153162555	153164152	1598	131	8.19775	5.81189	18.4117	1	exonized	Charlie1b	DNA/hAT-Charlie	chr1	153163860	153163990	-	20.18	Ancient
XLOC_000421	linc-ROBLD3-1	TCONS_00000316	lincRNA	chr1	155961181	155971578	+	10398	401	FIRST	1	chr1	155961181	155961301	121	80	66.1157	19.9501	19.9501	1	exonized	L2c	LINE/L2	chr1	155961214	155961293	-	32.46	Ancient
XLOC_000423	linc-TTC24-2	TCONS_00000317	lincRNA	chr1	156358018	156365401	+	7384	5586	LAST	2	chr1	156359954	156365401	5448	158	2.90015	2.8285	28.1239	1	exonized	MIR	SINE/MIR	chr1	156363069	156363226	-	27.84	Ancient
XLOC_000423	linc-TTC24-2	TCONS_00000317	lincRNA	chr1	156358018	156365401	+	7384	5586	LAST	2	chr1	156359954	156365401	5448	63	1.15639	1.12782	28.1239	1	exonized	L2c	LINE/L2	chr1	156361466	156361528	-	32.46	Ancient
XLOC_000423	linc-TTC24-2	TCONS_00000317	lincRNA	chr1	156358018	156365401	+	7384	5586	LAST	2	chr1	156359954	156365401	5448	303	5.56167	5.42427	28.1239	1	exonized	AluSq2	SINE/Alu	chr1	156365047	156365349	-	10.62	LineageSpe
XLOC_000423	linc-TTC24-2	TCONS_00000317	lincRNA	chr1	156358018	156365401	+	7384	5586	LAST	2	chr1	156359954	156365401	5448	138	2.53304	2.47046	28.1239	1	exonized	L2a	LINE/L2	chr1	156363255	156363392	+	29.37	Ancient
XLOC_000423	linc-TTC24-2	TCONS_00000317	lincRNA	chr1	156358018	156365401	+	7384	5586	LAST	2	chr1	156359954	156365401	5448	233	4.2768	4.17114	28.1239	1	exonized	L2a	LINE/L2	chr1	156363816	156364048	+	29.37	Ancient
XLOC_000423	linc-TTC24-2	TCONS_00000317	lincRNA	chr1	156358018	156365401	+	7384	5586	LAST	2	chr1	156359954	156365401	5448	185	3.39574	3.31185	28.1239	1	exonized	L1MC5	LINE/L1	chr1	156363393	156363577	+	23.77	Ancient
XLOC_000423	linc-TTC24-2	TCONS_00000317	lincRNA	chr1	156358018	156365401	+	7384	5586	LAST	2	chr1	156359954	156365401	5448	276	5.06608	4.94092	28.1239	1	exonized	MIRb	SINE/MIR	chr1	156364420	156364695	-	29.76	Ancient
XLOC_000423	linc-TTC24-2	TCONS_00000317	lincRNA	chr1	156358018	156365401	+	7384	5586	LAST	2	chr1	156359954	156365401	5448	215	3.9464	3.84891	28.1239	1	exonized	AluSz6	SINE/Alu	chr1	156363598	156363812	-	13.16	LineageSpe
XLOC_000424	linc-TTC24-1	TCONS_00001172	lincRNA	chr1	156481487	156483108	+	1622	1203	FIRST	1	chr1	156481487	156481636	150	75	50	6.23441	75.478	2	SPL	MIRb	SINE/MIR	chr1	156481562	156481732	+	29.76	Ancient
XLOC_000424	linc-TTC24-1	TCONS_00001172	lincRNA	chr1	156481487	156483108	+	1622	1203	MIDDLE	2	chr1	156481763	156481808	46	15	32.6087	1.24688	75.478	2	SPL	L3	LINE/CR1	chr1	156481794	156482435	+	32.5	Ancient
XLOC_000424	linc-TTC24-1	TCONS_00001172	lincRNA	chr1	156481487	156483108	+	1622	1203	LAST	3	chr1	156482102	156483108	1007	300	29.7915	24.9377	75.478	2	exonized	AluSg	SINE/Alu	chr1	156482605	156482904	-	10.37	LineageSpe
XLOC_000424	linc-TTC24-1	TCONS_00001172	lincRNA	chr1	156481487	156483108	+	1622	1203	LAST	3	chr1	156482102	156483108	1007	54	5.36246	4.48878	75.478	2	PolyA	Charlie15b	DNA/hAT-Charlie	chr1	156483055	156483133	+	26.71	Ancient
XLOC_000424	linc-TTC24-1	TCONS_00001172	lincRNA	chr1	156481487	156483108	+	1622	1203	LAST	3	chr1	156482102	156483108	1007	334	33.1678	27.7639	75.478	2	SPL	L3	LINE/CR1	chr1	156481794	156482435	+	32.5	Ancient
XLOC_000424	linc-TTC24-1	TCONS_00001172	lincRNA	chr1	156481487	156483108	+	1622	1203	LAST	3	chr1	156482102	156483108	1007	130	12.9096	10.8063	75.478	2	exonized	MER5A1	DNA/hAT-Charlie	chr1	156482458	156482587	+	21.58	Ancient
XLOC_000424	linc-TTC24-1	TCONS_00002182	lincRNA	chr1	156481506	156481844	+	339	213	LAST	2	chr1	156481763	156481844	82	51	62.1951	23.9437	59.1549	2	PolyA	L3	LINE/CR1	chr1	156481794	156482435	+	32.5	Ancient
XLOC_000424	linc-TTC24-1	TCONS_00002182	lincRNA	chr1	156481506	156481844	+	339	213	FIRST	1	chr1	156481506	156481636	131	75	57.2519	35.2113	59.1549	2	SPL	MIRb	SINE/MIR	chr1	156481562	156481732	+	29.76	Ancient
XLOC_000429	linc-CD1D-1	TCONS_00001176	lincRNA	chr1	158130281	158132748	+	2468	241	LAST	2	chr1	158132552	158132748	197	92	46.7005	38.1743	38.1743	1	PolyA	MIR	SINE/MIR	chr1	158132657	158132884	+	27.84	Ancient
XLOC_000440	linc-SDHC-1	TCONS_00001179	lincRNA	chr1	161265664	161266179	+	516	364	LAST	2	chr1	161265855	161266179	325	158	48.6154	43.4066	100	1	SPL	ERVL-E-int	LTR/ERVL	chr1	161265395	161266012	+	30.69	Ancient
XLOC_000440	linc-SDHC-1	TCONS_00001179	lincRNA	chr1	161265664	161266179	+	516	364	FIRST	1	chr1	161265664	161265702	39	39	100	10.7143	100	1	TSS_SPL	ERVL-E-int	LTR/ERVL	chr1	161265395	161266012	+	30.69	Ancient
XLOC_000440	linc-SDHC-1	TCONS_00001179	lincRNA	chr1	161265664	161266179	+	516	364	LAST	2	chr1	161265855	161266179	325	167	51.3846	45.8791	100	1	PolyA	MER44B	DNA/TcMar-Tigger	chr1	161266013	161266430	+	18.75	Ancient
XLOC_000441	linc-FCGR2A-1	TCONS_00000324	lincRNA	chr1	161337812	161341754	+	3943	1806	LAST	2	chr1	161341093	161341754	662	51	7.70393	2.82392	54.0421	1	exonized	L1ME4b	LINE/L1	chr1	161341343	161341393	-	26.79	Ancient
XLOC_000441	linc-FCGR2A-1	TCONS_00000324	lincRNA	chr1	161337812	161341754	+	3943	1806	LAST	2	chr1	161341093	161341754	662	126	19.0332	6.97674	54.0421	1	PolyA	L1M5	LINE/L1	chr1	161341629	161341815	-	28.23	Ancient
XLOC_000441	linc-FCGR2A-1	TCONS_00000324	lincRNA	chr1	161337812	161341754	+	3943	1806	LAST	2	chr1	161341093	161341754	662	250	37.7644	13.8427	54.0421	1	SPL	AluJb	SINE/Alu	chr1	161341049	161341342	-	16.49	LineageSpe
XLOC_000441	linc-FCGR2A-1	TCONS_00000324	lincRNA	chr1	161337812	161341754	+	3943	1806	FIRST	1	chr1	161337812	161338955	1144	217	18.9685	12.0155	54.0421	1	SPL	AluSx3	SINE/Alu	chr1	161338739	161339043	+	11.23	LineageSpe
XLOC_000441	linc-FCGR2A-1	TCONS_00000324	lincRNA	chr1	161337812	161341754	+	3943	1806	LAST	2	chr1	161341093	161341754	662	103	15.5589	5.70321	54.0421	1	exonized	L1M1	LINE/L1	chr1	161341364	161341466	-	16.76	Ancient
XLOC_000441	linc-FCGR2A-1	TCONS_00000324	lincRNA	chr1	161337812	161341754	+	3943	1806	FIRST	1	chr1	161337812	161338955	1144	229	20.0175	12.68	54.0421	1	exonized	MIRb	SINE/MIR	chr1	161337980	161338208	+	29.76	Ancient
XLOC_000443	linc-NOS1AP-1	TCONS_00000325	lincRNA	chr1	162008806	162009357	+	552	453	LAST	2	chr1	162009133	162009357	225	74	32.8889	16.3355	16.3355	2	PolyA	MLT1D	LTR/ERVL-MaLR	chr1	162009284	162009726	+	21.73	Ancient
XLOC_000446	linc-NUF2-1	TCONS_00000327	lincRNA	chr1	163229640	163230449	+	810	469	LAST	2	chr1	163230340	163230449	110	110	100	23.4542	23.4542	1	PolyA_SPL	L1PB3	LINE/L1	chr1	163230249	163230458	+	15.9	LineageSpe
XLOC_000447	linc-PBX1-1	TCONS_00001181	lincRNA	chr1	163393106	163394820	+	1715	588	FIRST	1	chr1	163393106	163393666	561	342	60.9626	58.1633	58.1633	1	SPL	MLT1E2	LTR/ERVL-MaLR	chr1	163393325	163393837	+	24.28	Ancient
XLOC_000451	linc-POGK-1	TCONS_00000328	lincRNA	chr1	166304121	166304999	+	879	423	FIRST	1	chr1	166304121	166304200	80	80	100	18.9125	94.7991	2	TSS_SPL	MER92-int	LTR/ERV1	chr1	166303945	166304680	+	20.74	Ancient
XLOC_000451	linc-POGK-1	TCONS_00000328	lincRNA	chr1	166304121	166304999	+	879	423	LAST	3	chr1	166304795	166304999	205	205	100	48.4634	94.7991	2	PolyA_SPL	MER92D	LTR/ERV1	chr1	166304708	166305022	+	21.58	Ancient
XLOC_000451	linc-POGK-1	TCONS_00000328	lincRNA	chr1	166304121	166304999	+	879	423	MIDDLE	2	chr1	166304565	166304702	138	116	84.058	27.4232	94.7991	2	SPL	MER92-int	LTR/ERV1	chr1	166303945	166304680	+	20.74	Ancient
XLOC_000451	linc-POGK-1	TCONS_00001187	lincRNA	chr1	166304661	166308626	+	3966	532	LAST	2	chr1	166308137	166308626	490	136	27.7551	25.5639	29.3233	2	exonized	L2b	LINE/L2	chr1	166308356	166308491	+	32.38	Ancient
XLOC_000451	linc-POGK-1	TCONS_00001187	lincRNA	chr1	166304661	166308626	+	3966	532	FIRST	1	chr1	166304661	166304702	42	20	47.619	3.7594	29.3233	2	TSS	MER92-int	LTR/ERV1	chr1	166303945	166304680	+	20.74	Ancient
XLOC_000454	linc-XCL1-1	TCONS_00001189	lincRNA	chr1	168286744	168288713	+	1970	251	LAST	2	chr1	168288604	168288713	110	110	100	43.8247	75.2988	1	PolyA_SPL	L1MB8	LINE/L1	chr1	168288371	168288840	-	19.45	Ancient
XLOC_000454	linc-XCL1-1	TCONS_00001189	lincRNA	chr1	168286744	168288713	+	1970	251	FIRST	1	chr1	168286744	168286884	141	79	56.0284	31.4741	75.2988	1	TSS	LTR8B	LTR/ERV1	chr1	168286334	168286822	+	17.77	LineageSpe
XLOC_000455	linc-ATP1B1-3	TCONS_00000008	lincRNA	chr1	168756179	168762120	+	5942	949	LAST	3	chr1	168761569	168762120	552	91	16.4855	9.58904	39.9368	2	SPL	L2	LINE/L2	chr1	168761476	168761659	+	32.38	Ancient
XLOC_000455	linc-ATP1B1-3	TCONS_00000008	lincRNA	chr1	168756179	168762120	+	5942	949	FIRST	1	chr1	168756179	168756466	288	288	100	30.3477	39.9368	2	TSS_SPL	MLT1L	LTR/ERVL-MaLR	chr1	168756030	168756541	+	28.7	Ancient
XLOC_000455	linc-ATP1B1-3	TCONS_00001190	lincRNA	chr1	168756187	168758111	+	1925	359	FIRST	1	chr1	168756187	168756466	280	280	100	77.9944	77.9944	2	TSS_SPL	MLT1L	LTR/ERVL-MaLR	chr1	168756030	168756541	+	28.7	Ancient
XLOC_000456	linc-ATP1B1-2	TCONS_00001191	lincRNA	chr1	168773292	168838565	+	65274	410	LAST	2	chr1	168838215	168838565	351	170	48.433	41.4634	41.4634	1	exonized	MIR3	SINE/MIR	chr1	168838312	168838481	-	29.77	Ancient
XLOC_000461	linc-PRRX1-1	TCONS_00000332	lincRNA	chr1	170567995	170616480	+	48486	1923	LAST	3	chr1	170615409	170616480	1072	115	10.7276	5.98024	77.8471	1	exonized	L2c	LINE/L2	chr1	170616029	170616143	+	32.46	Ancient
XLOC_000461	linc-PRRX1-1	TCONS_00000332	lincRNA	chr1	170567995	170616480	+	48486	1923	MIDDLE	2	chr1	170608250	170608938	689	52	7.54717	2.70411	77.8471	1	SPL	AluSc	SINE/Alu	chr1	170608887	170609094	-	9.72	LineageSpe
XLOC_000461	linc-PRRX1-1	TCONS_00000332	lincRNA	chr1	170567995	170616480	+	48486	1923	LAST	3	chr1	170615409	170616480	1072	197	18.3769	10.2444	77.8471	1	exonized	LTR81C	LTR/Gypsy	chr1	170615749	170615945	+	30.61	Ancient
XLOC_000461	linc-PRRX1-1	TCONS_00000332	lincRNA	chr1	170567995	170616480	+	48486	1923	MIDDLE	2	chr1	170608250	170608938	689	73	10.5951	3.79615	77.8471	1	SPL	AluSc	SINE/Alu	chr1	170608224	170608322	-	9.72	LineageSpe
XLOC_000461	linc-PRRX1-1	TCONS_00000332	lincRNA	chr1	170567995	170616480	+	48486	1923	LAST	3	chr1	170615409	170616480	1072	334	31.1567	17.3687	77.8471	1	SPL	MER6	DNA/TcMar-Tigger	chr1	170614876	170615742	-	17.05	Ancient
XLOC_000461	linc-PRRX1-1	TCONS_00000332	lincRNA	chr1	170567995	170616480	+	48486	1923	MIDDLE	2	chr1	170608250	170608938	689	564	81.8578	29.3292	77.8471	1	exonized	LTR12F	LTR/ERV1	chr1	170608323	170608886	+	10.25	LineageSpe
XLOC_000461	linc-PRRX1-1	TCONS_00000332	lincRNA	chr1	170567995	170616480	+	48486	1923	FIRST	1	chr1	170567995	170568156	162	162	100	8.42434	77.8471	1	TSS_SPL	Tigger3c	DNA/TcMar-Tigger	chr1	170567876	170568477	+	16.49	LineageSpe
XLOC_000462	linc-METTL13-2	TCONS_00001200	lincRNA	chr1	171584011	171593241	+	9231	396	FIRST	1	chr1	171584011	171584145	135	135	100	34.0909	34.0909	2	TSS_SPL	L2a	LINE/L2	chr1	171583931	171584571	-	29.37	Ancient
XLOC_000467	linc-ZBTB37-1	TCONS_00000336	lincRNA	chr1	173831290	173833079	+	1790	853	LAST	2	chr1	173832364	173833079	716	36	5.02793	4.2204	6.91676	1	SPL	AluSg7	SINE/Alu	chr1	173832163	173832399	+	9.04	LineageSpe
XLOC_000467	linc-ZBTB37-1	TCONS_00000336	lincRNA	chr1	173831290	173833079	+	1790	853	FIRST	1	chr1	173831290	173831426	137	23	16.7883	2.69637	6.91676	1	SPL	AluSg	SINE/Alu	chr1	173831404	173831688	-	10.37	LineageSpe
XLOC_000470	linc-PAPPA2-2	TCONS_00000338	lincRNA	chr1	175846479	175849604	+	3126	1809	LAST	3	chr1	175849335	175849604	270	103	38.1481	5.69375	49.1432	1	SPL	MIR3	SINE/MIR	chr1	175849302	175849437	-	29.77	Ancient
XLOC_000470	linc-PAPPA2-2	TCONS_00000338	lincRNA	chr1	175846479	175849604	+	3126	1809	LAST	3	chr1	175849335	175849604	270	141	52.2222	7.79436	49.1432	1	PolyA	MIRb	SINE/MIR	chr1	175849464	175849648	+	29.76	Ancient
XLOC_000470	linc-PAPPA2-2	TCONS_00000338	lincRNA	chr1	175846479	175849604	+	3126	1809	MIDDLE	2	chr1	175847951	175849237	1287	160	12.432	8.84467	49.1432	1	exonized	MIR3	SINE/MIR	chr1	175848442	175848601	+	29.77	Ancient
XLOC_000470	linc-PAPPA2-2	TCONS_00000338	lincRNA	chr1	175846479	175849604	+	3126	1809	MIDDLE	2	chr1	175847951	175849237	1287	208	16.1616	11.4981	49.1432	1	SPL	MIRb	SINE/MIR	chr1	175847949	175848158	+	29.76	Ancient
XLOC_000470	linc-PAPPA2-2	TCONS_00000338	lincRNA	chr1	175846479	175849604	+	3126	1809	MIDDLE	2	chr1	175847951	175849237	1287	277	21.5229	15.3123	49.1432	1	exonized	MLT1I	LTR/ERVL-MaLR	chr1	175848938	175849214	-	29.11	Ancient
XLOC_000471	linc-PAPPA2-1	TCONS_00000339	lincRNA	chr1	176176784	176198466	+	21683	579	LAST	3	chr1	176198225	176198466	242	13	5.3719	2.24525	52.677	2	SPL	L1MEf	LINE/L1	chr1	176197818	176198237	-	26.28	Ancient
XLOC_000471	linc-PAPPA2-1	TCONS_00000339	lincRNA	chr1	176176784	176198466	+	21683	579	LAST	3	chr1	176198225	176198466	242	179	73.9669	30.9154	52.677	2	PolyA	L1PA13	LINE/L1	chr1	176198288	176199447	+	12.94	LineageSpe
XLOC_000471	linc-PAPPA2-1	TCONS_00000339	lincRNA	chr1	176176784	176198466	+	21683	579	MIDDLE	2	chr1	176187670	176187782	113	113	100	19.5164	52.677	2	Both_SPL	THE1D	LTR/ERVL-MaLR	chr1	176187506	176187865	+	13.27	LineageSpe
XLOC_000471	linc-PAPPA2-1	TCONS_00001205	lincRNA	chr1	176187687	176198485	+	10799	422	LAST	3	chr1	176198225	176198485	261	13	4.98084	3.08057	88.1517	2	SPL	L1MEf	LINE/L1	chr1	176197818	176198237	-	26.28	Ancient
XLOC_000471	linc-PAPPA2-1	TCONS_00001205	lincRNA	chr1	176187687	176198485	+	10799	422	FIRST	1	chr1	176187687	176187782	96	96	100	22.7488	88.1517	2	TSS_SPL	THE1D	LTR/ERVL-MaLR	chr1	176187506	176187865	+	13.27	LineageSpe
XLOC_000471	linc-PAPPA2-1	TCONS_00001205	lincRNA	chr1	176187687	176198485	+	10799	422	LAST	3	chr1	176198225	176198485	261	198	75.8621	46.9194	88.1517	2	PolyA	L1PA13	LINE/L1	chr1	176198288	176199447	+	12.94	LineageSpe
XLOC_000471	linc-PAPPA2-1	TCONS_00001205	lincRNA	chr1	176187687	176198485	+	10799	422	MIDDLE	2	chr1	176197321	176197385	65	65	100	15.4028	88.1517	2	Both_SPL	L1MEf	LINE/L1	chr1	176197082	176197501	-	26.28	Ancient
XLOC_000473	linc-RASAL2-1	TCONS_00000341	lincRNA	chr1	177669659	177679465	+	9807	1666	MIDDLE	2	chr1	177670594	177670709	116	116	100	6.96279	22.6891	1	Both_SPL	L2a	LINE/L2	chr1	177670548	177671365	-	29.37	Ancient
XLOC_000473	linc-RASAL2-1	TCONS_00000341	lincRNA	chr1	177669659	177679465	+	9807	1666	FIRST	1	chr1	177669659	177670497	839	59	7.03218	3.54142	22.6891	1	exonized	MER5A	DNA/hAT-Charlie	chr1	177669797	177669855	-	25.27	Ancient
XLOC_000473	linc-RASAL2-1	TCONS_00000341	lincRNA	chr1	177669659	177679465	+	9807	1666	FIRST	1	chr1	177669659	177670497	839	203	24.1955	12.1849	22.6891	1	exonized	L3	LINE/CR1	chr1	177669870	177670072	-	32.5	Ancient
XLOC_000474	linc-RALGPS2-2	TCONS_00001208	lincRNA	chr1	178621017	178631642	+	10626	347	LAST	2	chr1	178631318	178631642	325	76	23.3846	21.902	21.902	1	PolyA	L2b	LINE/L2	chr1	178631567	178632070	-	32.38	Ancient
XLOC_000475	linc-RALGPS2-1	TCONS_00001209	lincRNA	chr1	178675709	178676861	+	1153	719	FIRST	1	chr1	178675709	178676397	689	99	14.3687	13.7691	20.8623	1	exonized	MIR3	SINE/MIR	chr1	178675808	178675906	-	29.77	Ancient
XLOC_000475	linc-RALGPS2-1	TCONS_00001209	lincRNA	chr1	178675709	178676861	+	1153	719	FIRST	1	chr1	178675709	178676397	689	51	7.40203	7.09318	20.8623	1	TSS	Tigger16a	DNA/TcMar-Tigger	chr1	178675600	178675759	+	28.23	Ancient
XLOC_000476	linc-QSOX1-1	TCONS_00001210	lincRNA	chr1	180100864	180103986	+	3123	316	LAST	2	chr1	180103701	180103986	286	54	18.8811	17.0886	84.1772	1	exonized	L1ME4c	LINE/L1	chr1	180103744	180103797	+	27.93	Ancient
XLOC_000476	linc-QSOX1-1	TCONS_00001210	lincRNA	chr1	180100864	180103986	+	3123	316	FIRST	1	chr1	180100864	180100893	30	30	100	9.49367	84.1772	1	TSS_SPL	L2b	LINE/L2	chr1	180100728	180101404	-	32.38	Ancient
XLOC_000476	linc-QSOX1-1	TCONS_00001210	lincRNA	chr1	180100864	180103986	+	3123	316	LAST	2	chr1	180103701	180103986	286	182	63.6364	57.5949	84.1772	1	PolyA	LTR47B4	LTR/ERVL	chr1	180103805	180104258	-	15.35	LineageSpe
XLOC_000477	linc-XPR1-1	TCONS_00000058	lincRNA	chr1	180528110	180535654	+	7545	1491	LAST	3	chr1	180534387	180535654	1268	179	14.1167	12.0054	17.505	3	exonized	L2b	LINE/L2	chr1	180534834	180535012	-	32.38	Ancient
XLOC_000477	linc-XPR1-1	TCONS_00000058	lincRNA	chr1	180528110	180535654	+	7545	1491	FIRST	1	chr1	180528110	180528191	82	82	100	5.49966	17.505	3	TSS_SPL	THE1A	LTR/ERVL-MaLR	chr1	180527905	180528269	+	10.32	LineageSpe
XLOC_000477	linc-XPR1-1	TCONS_00001211	lincRNA	chr1	180530380	180535634	+	5255	1838	LAST	3	chr1	180534387	180535634	1248	179	14.3429	9.73885	9.73885	3	exonized	L2b	LINE/L2	chr1	180534834	180535012	-	32.38	Ancient
XLOC_000477	linc-XPR1-1	TCONS_00002198	lincRNA	chr1	180531406	180535508	+	4103	1197	LAST	2	chr1	180534387	180535508	1122	179	15.9537	14.9541	14.9541	3	exonized	L2b	LINE/L2	chr1	180534834	180535012	-	32.38	Ancient
XLOC_000478	linc-KIAA1614-2	TCONS_00001212	lincRNA	chr1	180864246	180869874	+	5629	1817	LAST	2	chr1	180868088	180869874	1787	86	4.81253	4.73308	6.38415	1	exonized	MIR3	SINE/MIR	chr1	180868144	180868229	-	29.77	Ancient
XLOC_000478	linc-KIAA1614-2	TCONS_00001212	lincRNA	chr1	180864246	180869874	+	5629	1817	FIRST	1	chr1	180864246	180864275	30	30	100	1.65107	6.38415	1	TSS_SPL	ERV3-16A3_I-int	LTR/ERVL	chr1	180863890	180866142	+	28.49	Ancient
XLOC_000480	linc-CACNA1E-2	TCONS_00000059	lincRNA	chr1	181143620	181151340	+	7721	538	FIRST	1	chr1	181143620	181143711	92	92	100	17.1004	77.881	2	TSS_SPL	AluSx	SINE/Alu	chr1	181143574	181143862	-	11.66	LineageSpe
XLOC_000480	linc-CACNA1E-2	TCONS_00000059	lincRNA	chr1	181143620	181151340	+	7721	538	LAST	3	chr1	181151025	181151340	316	316	100	58.7361	77.881	2	PolyA_SPL	MER50	LTR/ERV1	chr1	181150728	181151461	+	15.84	Ancient
XLOC_000480	linc-CACNA1E-2	TCONS_00000059	lincRNA	chr1	181143620	181151340	+	7721	538	MIDDLE	2	chr1	181144473	181144602	130	11	8.46154	2.04461	77.881	2	SPL	MLT1D	LTR/ERVL-MaLR	chr1	181144028	181144483	+	21.73	Ancient
XLOC_000480	linc-CACNA1E-2	TCONS_00000344	lincRNA	chr1	181144473	181151343	+	6871	541	FIRST	1	chr1	181144473	181144569	97	11	11.3402	2.03327	83.9187	2	TSS	MLT1D	LTR/ERVL-MaLR	chr1	181144028	181144483	+	21.73	Ancient
XLOC_000480	linc-CACNA1E-2	TCONS_00000344	lincRNA	chr1	181144473	181151343	+	6871	541	LAST	3	chr1	181151025	181151343	319	319	100	58.9649	83.9187	2	PolyA_SPL	MER50	LTR/ERV1	chr1	181150728	181151461	+	15.84	Ancient
XLOC_000480	linc-CACNA1E-2	TCONS_00000344	lincRNA	chr1	181144473	181151343	+	6871	541	MIDDLE	2	chr1	181144846	181144970	125	124	99.2	22.9205	83.9187	2	SPL	L2a	LINE/L2	chr1	181144847	181145366	-	29.37	Ancient
XLOC_000482	linc-RGSL1-3	TCONS_00001215	lincRNA	chr1	181904062	181906113	+	2052	600	FIRST	1	chr1	181904062	181904507	446	375	84.0807	62.5	62.5	1	TSS	L3	LINE/CR1	chr1	181903841	181904436	+	32.5	Ancient
XLOC_000485	linc-RGSL1-1	TCONS_00000009	lincRNA	chr1	182376756	182383948	+	7193	738	MIDDLE	3	chr1	182378378	182378495	118	59	50	7.99458	7.99458	1	SPL	ERVL-E-int	LTR/ERVL	chr1	182378437	182378560	+	30.69	Ancient
XLOC_000486	linc-NPL-1	TCONS_00000347	lincRNA	chr1	182681997	182683679	+	1683	259	LAST	2	chr1	182683448	182683679	232	118	50.8621	45.5598	45.5598	2	SPL	L2a	LINE/L2	chr1	182683236	182683565	+	29.37	Ancient
XLOC_000486	linc-NPL-1	TCONS_00001216	lincRNA	chr1	182681805	182683733	+	1929	443	LAST	2	chr1	182683448	182683733	286	118	41.2587	26.6366	26.6366	2	SPL	L2a	LINE/L2	chr1	182683236	182683565	+	29.37	Ancient
XLOC_000490	linc-C1orf21-2	TCONS_00001218	lincRNA	chr1	184090200	184091540	+	1341	805	FIRST	1	chr1	184090200	184090384	185	177	95.6757	21.9876	21.9876	1	TSS	L2c	LINE/L2	chr1	184090053	184090376	-	32.46	Ancient
XLOC_000491	linc-C1orf21-1	TCONS_00000348	lincRNA	chr1	184298205	184301960	+	3756	333	LAST	2	chr1	184301732	184301960	229	135	58.952	40.5405	40.5405	1	exonized	Charlie16a	DNA/hAT-Charlie	chr1	184301814	184301948	+	27.55	Ancient
XLOC_000492	linc-RNF2-2	TCONS_00001219	lincRNA	chr1	184632075	184634810	+	2736	1896	LAST	2	chr1	184634403	184634810	408	71	17.402	3.74473	33.4916	1	exonized	MIRb	SINE/MIR	chr1	184634456	184634526	-	29.76	Ancient
XLOC_000492	linc-RNF2-2	TCONS_00001219	lincRNA	chr1	184632075	184634810	+	2736	1896	FIRST	1	chr1	184632075	184633562	1488	134	9.00538	7.06751	33.4916	1	exonized	AluJo	SINE/Alu	chr1	184632228	184632361	-	16.42	LineageSpe
XLOC_000492	linc-RNF2-2	TCONS_00001219	lincRNA	chr1	184632075	184634810	+	2736	1896	FIRST	1	chr1	184632075	184633562	1488	130	8.73656	6.85654	33.4916	1	TSS	L1MA4	LINE/L1	chr1	184632005	184632204	-	16.93	Ancient
XLOC_000492	linc-RNF2-2	TCONS_00001219	lincRNA	chr1	184632075	184634810	+	2736	1896	FIRST	1	chr1	184632075	184633562	1488	81	5.44355	4.27215	33.4916	1	exonized	MIRb	SINE/MIR	chr1	184632736	184632816	-	29.76	Ancient
XLOC_000492	linc-RNF2-2	TCONS_00001219	lincRNA	chr1	184632075	184634810	+	2736	1896	FIRST	1	chr1	184632075	184633562	1488	219	14.7177	11.5506	33.4916	1	exonized	MIR	SINE/MIR	chr1	184632892	184633110	+	27.84	Ancient
XLOC_000493	linc-RNF2-1	TCONS_00001220	lincRNA	chr1	184746600	184748797	+	2198	471	FIRST	1	chr1	184746600	184746633	34	34	100	7.21868	47.1338	1	TSS_SPL	AluJb	SINE/Alu	chr1	184746386	184746653	-	16.49	LineageSpe
XLOC_000493	linc-RNF2-1	TCONS_00001220	lincRNA	chr1	184746600	184748797	+	2198	471	LAST	2	chr1	184748361	184748797	437	118	27.0023	25.0531	47.1338	1	exonized	MLT1N2	LTR/ERVL-MaLR	chr1	184748578	184748695	-	29.6	Ancient
XLOC_000493	linc-RNF2-1	TCONS_00001220	lincRNA	chr1	184746600	184748797	+	2198	471	LAST	2	chr1	184748361	184748797	437	70	16.0183	14.862	47.1338	1	PolyA	MLT1N2	LTR/ERVL-MaLR	chr1	184748728	184749023	-	29.6	Ancient
XLOC_000494	linc-HMCN1-2	TCONS_00001221	lincRNA	chr1	185339834	185344123	+	4290	794	LAST	3	chr1	185343529	185344123	595	195	32.7731	24.5592	35.6423	1	exonized	MIR3	SINE/MIR	chr1	185343796	185343990	+	29.77	Ancient
XLOC_000494	linc-HMCN1-2	TCONS_00001221	lincRNA	chr1	185339834	185344123	+	4290	794	FIRST	1	chr1	185339834	185339921	88	88	100	11.0831	35.6423	1	TSS_SPL	AluJb	SINE/Alu	chr1	185339771	185339945	-	16.49	LineageSpe
XLOC_000495	linc-HMCN1-1	TCONS_00000349	lincRNA	chr1	185527511	185534763	+	7253	616	LAST	3	chr1	185534606	185534763	158	158	100	25.6494	77.2727	2	PolyA_SPL	L4_A_Mam	LINE/RTE-X	chr1	185533977	185534852	-	30.93	Ancient
XLOC_000495	linc-HMCN1-1	TCONS_00000349	lincRNA	chr1	185527511	185534763	+	7253	616	MIDDLE	2	chr1	185532300	185532460	161	21	13.0435	3.40909	77.2727	2	SPL	Tigger19a	DNA/TcMar-Tigger	chr1	185532440	185532705	-	31.56	Ancient
XLOC_000495	linc-HMCN1-1	TCONS_00000349	lincRNA	chr1	185527511	185534763	+	7253	616	FIRST	1	chr1	185527511	185527807	297	297	100	48.2143	77.2727	2	TSS_SPL	MLT1J2	LTR/ERVL-MaLR	chr1	185527457	185527871	-	28.4	Ancient
XLOC_000495	linc-HMCN1-1	TCONS_00002202	lincRNA	chr1	185532300	185590112	+	57813	217	LAST	2	chr1	185590089	185590112	24	24	100	11.0599	35.4839	2	PolyA_SPL	L1MC1	LINE/L1	chr1	185589530	185591004	+	16.34	Ancient
XLOC_000495	linc-HMCN1-1	TCONS_00002202	lincRNA	chr1	185532300	185590112	+	57813	217	FIRST	1	chr1	185532300	185532492	193	53	27.4611	24.424	35.4839	2	SPL	Tigger19a	DNA/TcMar-Tigger	chr1	185532440	185532705	-	31.56	Ancient
XLOC_000497	linc-RGS18-11	TCONS_00000350	lincRNA	chr1	187061974	187329455	+	267482	858	FIRST	1	chr1	187061974	187062078	105	89	84.7619	10.373	81.9347	1	TSS	AluJo	SINE/Alu	chr1	187061819	187062062	-	16.42	LineageSpe
XLOC_000497	linc-RGS18-11	TCONS_00000350	lincRNA	chr1	187061974	187329455	+	267482	858	LAST	4	chr1	187328847	187329455	609	583	95.7307	67.9487	81.9347	1	PolyA	L1ME3A	LINE/L1	chr1	187328873	187329839	-	25.23	Ancient
XLOC_000497	linc-RGS18-11	TCONS_00000350	lincRNA	chr1	187061974	187329455	+	267482	858	MIDDLE	2	chr1	187272598	187272671	74	31	41.8919	3.61305	81.9347	1	SPL	L2a	LINE/L2	chr1	187272375	187272628	+	29.37	Ancient
XLOC_000498	linc-RGS18-10	TCONS_00000351	lincRNA	chr1	187412738	187439371	+	26634	290	LAST	2	chr1	187439203	187439371	169	169	100	58.2759	58.2759	2	PolyA_SPL	MER4-int	LTR/ERV1	chr1	187438697	187439689	+	13.39	LineageSpe
XLOC_000498	linc-RGS18-10	TCONS_00000352	lincRNA	chr1	187412760	187446354	+	33595	424	MIDDLE	2	chr1	187439203	187439324	122	122	100	28.7736	28.7736	2	Both_SPL	MER4-int	LTR/ERV1	chr1	187438697	187439689	+	13.39	LineageSpe
XLOC_000500	linc-RGS18-8	TCONS_00000353	lincRNA	chr1	188477669	188505596	+	27928	746	MIDDLE	3	chr1	188504887	188504989	103	103	100	13.807	44.1019	1	Both_SPL	L2a	LINE/L2	chr1	188503548	188505261	+	29.37	Ancient
XLOC_000500	linc-RGS18-8	TCONS_00000353	lincRNA	chr1	188477669	188505596	+	27928	746	MIDDLE	2	chr1	188498327	188498508	182	98	53.8462	13.1367	44.1019	1	SPL	L1MEc	LINE/L1	chr1	188498033	188498424	+	25.01	Ancient
XLOC_000500	linc-RGS18-8	TCONS_00000353	lincRNA	chr1	188477669	188505596	+	27928	746	FIRST	1	chr1	188477669	188477796	128	128	100	17.1582	44.1019	1	TSS_SPL	LTR79	LTR/ERVL	chr1	188477666	188477840	+	28.72	Ancient
XLOC_000502	linc-RGS18-6	TCONS_00001225	lincRNA	chr1	189118917	189119860	+	944	279	LAST	2	chr1	189119673	189119860	188	187	99.4681	67.0251	99.6416	1	PolyA	MER76	LTR/ERVL	chr1	189119674	189120060	-	23.19	Ancient
XLOC_000502	linc-RGS18-6	TCONS_00001225	lincRNA	chr1	189118917	189119860	+	944	279	FIRST	1	chr1	189118917	189119007	91	91	100	32.6165	99.6416	1	TSS_SPL	LTR1A2	LTR/ERV1	chr1	189118681	189119468	+	12.54	LineageSpe
XLOC_000503	linc-RGS18-5	TCONS_00000355	lincRNA	chr1	189744595	189784048	+	39454	451	MIDDLE	3	chr1	189760709	189760893	185	78	42.1622	17.2949	17.2949	1	SPL	MER44A	DNA/TcMar-Tigger	chr1	189760816	189761139	+	15.91	Ancient
XLOC_000505	linc-RGS18-3	TCONS_00000358	lincRNA	chr1	190449509	190463427	+	13919	506	LAST	2	chr1	190462968	190463427	460	68	14.7826	13.4387	13.4387	9	SPL	MLT1N2	LTR/ERVL-MaLR	chr1	190462911	190463035	+	29.6	Ancient
XLOC_000505	linc-RGS18-3	TCONS_00001228	lincRNA	chr1	190447611	190463251	+	15641	665	LAST	3	chr1	190462968	190463251	284	68	23.9437	10.2256	10.2256	9	SPL	MLT1N2	LTR/ERVL-MaLR	chr1	190462911	190463035	+	29.6	Ancient
XLOC_000506	linc-RGS18-2	TCONS_00000359	lincRNA	chr1	191190289	191197597	+	7309	299	LAST	2	chr1	191197453	191197597	145	31	21.3793	10.3679	10.3679	1	PolyA	MLT1J2-int	LTR/ERVL-MaLR	chr1	191197567	191197654	-	29.42	Ancient
XLOC_000507	linc-RGS18-1	TCONS_00000360	lincRNA	chr1	191844625	191980390	+	135766	2035	LAST	5	chr1	191978891	191980390	1500	312	20.8	15.3317	67.8624	1	exonized	L1M5	LINE/L1	chr1	191979902	191980213	+	28.23	Ancient
XLOC_000507	linc-RGS18-1	TCONS_00000360	lincRNA	chr1	191844625	191980390	+	135766	2035	LAST	5	chr1	191978891	191980390	1500	183	12.2	8.99263	67.8624	1	exonized	MER5A	DNA/hAT-Charlie	chr1	191979632	191979814	+	25.27	Ancient
XLOC_000507	linc-RGS18-1	TCONS_00000360	lincRNA	chr1	191844625	191980390	+	135766	2035	LAST	5	chr1	191978891	191980390	1500	156	10.4	7.66585	67.8624	1	exonized	L1MC5	LINE/L1	chr1	191979452	191979607	+	23.77	Ancient
XLOC_000507	linc-RGS18-1	TCONS_00000360	lincRNA	chr1	191844625	191980390	+	135766	2035	LAST	5	chr1	191978891	191980390	1500	541	36.0667	26.5848	67.8624	1	SPL	Tigger3b	DNA/TcMar-Tigger	chr1	191978301	191979431	-	14.29	LineageSpe
XLOC_000507	linc-RGS18-1	TCONS_00000360	lincRNA	chr1	191844625	191980390	+	135766	2035	FIRST	1	chr1	191844625	191844830	206	189	91.7476	9.28747	67.8624	1	TSS	MLT1A1	LTR/ERVL-MaLR	chr1	191844420	191844813	-	19.28	Ancient
XLOC_000508	linc-CFH-4	TCONS_00000361	lincRNA	chr1	193273875	193335083	+	61209	779	FIRST	1	chr1	193273875	193274068	194	64	32.9897	8.21566	8.21566	2	SPL	LTR12C	LTR/ERV1	chr1	193274005	193274175	-	8.77	LineageSpe
XLOC_000508	linc-CFH-4	TCONS_00001231	lincRNA	chr1	193318339	193325627	+	7289	939	LAST	3	chr1	193324892	193325627	736	521	70.788	55.4846	77.4228	2	PolyA	L2a	LINE/L2	chr1	193325107	193325898	+	29.37	Ancient
XLOC_000508	linc-CFH-4	TCONS_00001231	lincRNA	chr1	193318339	193325627	+	7289	939	LAST	3	chr1	193324892	193325627	736	206	27.9891	21.9382	77.4228	2	SPL	MLT1J	LTR/ERVL-MaLR	chr1	193324680	193325097	-	28.52	Ancient
XLOC_000509	linc-CFH-3	TCONS_00000362	lincRNA	chr1	193648024	193696313	+	48290	549	FIRST	1	chr1	193648024	193648135	112	112	100	20.4007	20.4007	1	TSS_SPL	MSTA	LTR/ERVL-MaLR	chr1	193647810	193648217	+	14.8	LineageSpe
XLOC_000510	linc-CFH-2	TCONS_00000363	lincRNA	chr1	194320073	194321556	+	1484	440	LAST	2	chr1	194321413	194321556	144	91	63.1944	20.6818	66.3636	1	exonized	AluYc	SINE/Alu	chr1	194321416	194321506	-	7.35	LineageSpe
XLOC_000510	linc-CFH-2	TCONS_00000363	lincRNA	chr1	194320073	194321556	+	1484	440	FIRST	1	chr1	194320073	194320368	296	89	30.0676	20.2273	66.3636	1	exonized	AluSz	SINE/Alu	chr1	194320251	194320339	+	12.11	LineageSpe
XLOC_000510	linc-CFH-2	TCONS_00000363	lincRNA	chr1	194320073	194321556	+	1484	440	LAST	2	chr1	194321413	194321556	144	49	34.0278	11.1364	66.3636	1	PolyA	AluYc	SINE/Alu	chr1	194321508	194321562	-	7.35	LineageSpe
XLOC_000510	linc-CFH-2	TCONS_00000363	lincRNA	chr1	194320073	194321556	+	1484	440	FIRST	1	chr1	194320073	194320368	296	63	21.2838	14.3182	66.3636	1	TSS	L1MEg	LINE/L1	chr1	194319260	194320135	+	27.07	Ancient
XLOC_000511	linc-CFH-1	TCONS_00001232	lincRNA	chr1	195450556	195469368	+	18813	221	LAST	2	chr1	195469301	195469368	68	68	100	30.7692	100	1	PolyA_SPL	L1MCc	LINE/L1	chr1	195469263	195469726	-	27.78	Ancient
XLOC_000511	linc-CFH-1	TCONS_00001232	lincRNA	chr1	195450556	195469368	+	18813	221	FIRST	1	chr1	195450556	195450708	153	153	100	69.2308	100	1	TSS_SPL	MER61A	LTR/ERV1	chr1	195450400	195450734	-	15.61	LineageSpe
XLOC_000513	linc-NR5A2-2	TCONS_00000364	lincRNA	chr1	198952450	198954330	+	1881	835	LAST	3	chr1	198953798	198954330	533	146	27.3921	17.485	72.6946	2	exonized	MIR	SINE/MIR	chr1	198954121	198954266	-	27.84	Ancient
XLOC_000513	linc-NR5A2-2	TCONS_00000364	lincRNA	chr1	198952450	198954330	+	1881	835	FIRST	1	chr1	198952450	198952611	162	105	64.8148	12.5749	72.6946	2	SPL	MLT1I	LTR/ERVL-MaLR	chr1	198952507	198952761	+	29.11	Ancient
XLOC_000513	linc-NR5A2-2	TCONS_00000364	lincRNA	chr1	198952450	198954330	+	1881	835	MIDDLE	2	chr1	198953019	198953158	140	140	100	16.7665	72.6946	2	Both_SPL	AluSq4	SINE/Alu	chr1	198952996	198953294	-	9.62	LineageSpe
XLOC_000513	linc-NR5A2-2	TCONS_00000364	lincRNA	chr1	198952450	198954330	+	1881	835	LAST	3	chr1	198953798	198954330	533	216	40.5253	25.8683	72.6946	2	exonized	MIRb	SINE/MIR	chr1	198953883	198954098	+	29.76	Ancient
XLOC_000513	linc-NR5A2-2	TCONS_00000365	lincRNA	chr1	198952753	198954529	+	1777	917	LAST	3	chr1	198953798	198954529	732	146	19.9454	15.9215	63.795	2	exonized	MIR	SINE/MIR	chr1	198954121	198954266	-	27.84	Ancient
XLOC_000513	linc-NR5A2-2	TCONS_00000365	lincRNA	chr1	198952753	198954529	+	1777	917	MIDDLE	2	chr1	198953019	198953158	140	140	100	15.2672	63.795	2	Both_SPL	AluSq4	SINE/Alu	chr1	198952996	198953294	-	9.62	LineageSpe
XLOC_000513	linc-NR5A2-2	TCONS_00000365	lincRNA	chr1	198952753	198954529	+	1777	917	LAST	3	chr1	198953798	198954529	732	83	11.3388	9.05125	63.795	2	PolyA	MIRb	SINE/MIR	chr1	198954447	198954606	+	29.76	Ancient
XLOC_000513	linc-NR5A2-2	TCONS_00000365	lincRNA	chr1	198952753	198954529	+	1777	917	LAST	3	chr1	198953798	198954529	732	216	29.5082	23.5551	63.795	2	exonized	MIRb	SINE/MIR	chr1	198953883	198954098	+	29.76	Ancient
XLOC_000514	linc-NR5A2-1	TCONS_00000366	lincRNA	chr1	198985262	199045864	+	60603	662	LAST	3	chr1	199045653	199045864	212	55	25.9434	8.30816	72.3565	1	exonized	L1MEc	LINE/L1	chr1	199045699	199045753	+	25.01	Ancient
XLOC_000514	linc-NR5A2-1	TCONS_00000366	lincRNA	chr1	198985262	199045864	+	60603	662	LAST	3	chr1	199045653	199045864	212	91	42.9245	13.7462	72.3565	1	PolyA	L1MEc	LINE/L1	chr1	199045774	199046394	+	25.01	Ancient
XLOC_000514	linc-NR5A2-1	TCONS_00000366	lincRNA	chr1	198985262	199045864	+	60603	662	FIRST	1	chr1	198985262	198985594	333	333	100	50.3021	72.3565	1	TSS_SPL	MLT1E1A	LTR/ERVL-MaLR	chr1	198985090	198985664	+	24.11	Ancient
XLOC_000515	linc-CAMSAP1L1-2	TCONS_00000061	lincRNA	chr1	200380928	200444641	+	63714	1768	FIRST	1	chr1	200380928	200381090	163	163	100	9.21946	9.21946	3	TSS_SPL	MER21B	LTR/ERVL	chr1	200380599	200381432	+	18.46	Ancient
XLOC_000515	linc-CAMSAP1L1-2	TCONS_00001233	lincRNA	chr1	200380829	200384659	+	3831	429	FIRST	1	chr1	200380829	200381090	262	262	100	61.0723	61.0723	3	TSS_SPL	MER21B	LTR/ERVL	chr1	200380599	200381432	+	18.46	Ancient
XLOC_000516	linc-CAMSAP1L1-1	TCONS_00001234	lincRNA	chr1	200661853	200663035	+	1183	278	LAST	2	chr1	200662822	200663035	214	174	81.3084	62.5899	85.6115	1	PolyA	AluSq2	SINE/Alu	chr1	200662862	200663187	-	10.62	LineageSpe
XLOC_000516	linc-CAMSAP1L1-1	TCONS_00001234	lincRNA	chr1	200661853	200663035	+	1183	278	FIRST	1	chr1	200661853	200661916	64	64	100	23.0216	85.6115	1	TSS_SPL	MER44A	DNA/TcMar-Tigger	chr1	200661811	200662140	+	15.91	Ancient
XLOC_000523	linc-NAV1-1	TCONS_00001243	lincRNA	chr1	201509228	201553236	+	44009	569	LAST	2	chr1	201552807	201553236	430	221	51.3953	38.8401	38.8401	3	exonized	MIR3	SINE/MIR	chr1	201552951	201553171	+	29.77	Ancient
XLOC_000523	linc-NAV1-1	TCONS_00002215	lincRNA	chr1	201508268	201552961	+	44694	358	LAST	2	chr1	201552807	201552961	155	11	7.09677	3.07263	3.07263	3	PolyA	MIR3	SINE/MIR	chr1	201552951	201553171	+	29.77	Ancient
XLOC_000523	linc-NAV1-1	TCONS_00002216	lincRNA	chr1	201508268	201557780	+	49513	317	LAST	2	chr1	201557667	201557780	114	103	90.3509	32.4921	35.9621	3	SPL	AluJr	SINE/Alu	chr1	201557473	201557769	-	16.75	LineageSpe
XLOC_000523	linc-NAV1-1	TCONS_00002216	lincRNA	chr1	201508268	201557780	+	49513	317	LAST	2	chr1	201557667	201557780	114	11	9.64912	3.47003	35.9621	3	PolyA	L1MB7	LINE/L1	chr1	201557770	201557976	+	19.22	Ancient
XLOC_000527	linc-TMEM183B-1	TCONS_00000371	lincRNA	chr1	202780090	202781041	+	952	634	LAST	2	chr1	202780817	202781041	225	65	28.8889	10.2524	10.2524	2	PolyA	L2c	LINE/L2	chr1	202780977	202781184	+	32.46	Ancient
XLOC_000527	linc-TMEM183B-1	TCONS_00002217	lincRNA	chr1	202779996	202781186	+	1191	539	LAST	2	chr1	202781151	202781186	36	34	94.4444	6.30798	6.30798	2	SPL	L2c	LINE/L2	chr1	202780977	202781184	+	32.46	Ancient
XLOC_000529	linc-PRELP-1	TCONS_00001247	lincRNA	chr1	203343738	203369257	+	25520	4013	LAST	5	chr1	203367603	203369257	1655	41	2.47734	1.02168	72.4396	4	SPL	L1MA9	LINE/L1	chr1	203366453	203367643	-	18.85	Ancient
XLOC_000529	linc-PRELP-1	TCONS_00001247	lincRNA	chr1	203343738	203369257	+	25520	4013	LAST	5	chr1	203367603	203369257	1655	308	18.6103	7.67506	72.4396	4	exonized	AluSx	SINE/Alu	chr1	203368811	203369118	+	11.66	LineageSpe
XLOC_000529	linc-PRELP-1	TCONS_00001247	lincRNA	chr1	203343738	203369257	+	25520	4013	MIDDLE	4	chr1	203365121	203367051	1931	57	2.95184	1.42038	72.4396	4	exonized	L1MEc	LINE/L1	chr1	203365732	203365788	-	25.01	Ancient
XLOC_000529	linc-PRELP-1	TCONS_00001247	lincRNA	chr1	203343738	203369257	+	25520	4013	LAST	5	chr1	203367603	203369257	1655	80	4.83384	1.99352	72.4396	4	exonized	L1MA9	LINE/L1	chr1	203368729	203368808	-	18.85	Ancient
XLOC_000529	linc-PRELP-1	TCONS_00001247	lincRNA	chr1	203343738	203369257	+	25520	4013	MIDDLE	4	chr1	203365121	203367051	1931	307	15.8985	7.65014	72.4396	4	exonized	AluSz6	SINE/Alu	chr1	203365425	203365731	-	13.16	LineageSpe
XLOC_000529	linc-PRELP-1	TCONS_00001247	lincRNA	chr1	203343738	203369257	+	25520	4013	LAST	5	chr1	203367603	203369257	1655	368	22.2356	9.1702	72.4396	4	exonized	L1MA9	LINE/L1	chr1	203367774	203368141	-	18.85	Ancient
XLOC_000529	linc-PRELP-1	TCONS_00001247	lincRNA	chr1	203343738	203369257	+	25520	4013	MIDDLE	4	chr1	203365121	203367051	1931	355	18.3843	8.84625	72.4396	4	exonized	L2a	LINE/L2	chr1	203365790	203366144	+	29.37	Ancient
XLOC_000529	linc-PRELP-1	TCONS_00001247	lincRNA	chr1	203343738	203369257	+	25520	4013	FIRST	1	chr1	203343738	203343857	120	65	54.1667	1.61974	72.4396	4	SPL	Tigger1	DNA/TcMar-Tigger	chr1	203343793	203344993	-	13.75	LineageSpe
XLOC_000529	linc-PRELP-1	TCONS_00001247	lincRNA	chr1	203343738	203369257	+	25520	4013	LAST	5	chr1	203367603	203369257	1655	130	7.85498	3.23947	72.4396	4	exonized	FLAM_C	SINE/Alu	chr1	203367644	203367773	+	15.79	LineageSpe
XLOC_000529	linc-PRELP-1	TCONS_00001247	lincRNA	chr1	203343738	203369257	+	25520	4013	LAST	5	chr1	203367603	203369257	1655	293	17.7039	7.30127	72.4396	4	exonized	L1MA9	LINE/L1	chr1	203368400	203368692	-	18.85	Ancient
XLOC_000529	linc-PRELP-1	TCONS_00001247	lincRNA	chr1	203343738	203369257	+	25520	4013	MIDDLE	4	chr1	203365121	203367051	1931	304	15.7431	7.57538	72.4396	4	SPL	L1MEc	LINE/L1	chr1	203364839	203365424	-	25.01	Ancient
XLOC_000529	linc-PRELP-1	TCONS_00001247	lincRNA	chr1	203343738	203369257	+	25520	4013	MIDDLE	4	chr1	203365121	203367051	1931	599	31.0202	14.9265	72.4396	4	SPL	L1MA9	LINE/L1	chr1	203366453	203367643	-	18.85	Ancient
XLOC_000529	linc-PRELP-1	TCONS_00001248	lincRNA	chr1	203364732	203369257	+	4526	3274	LAST	3	chr1	203367603	203369257	1655	41	2.47734	1.25229	84.0257	4	SPL	L1MA9	LINE/L1	chr1	203366453	203367643	-	18.85	Ancient
XLOC_000529	linc-PRELP-1	TCONS_00001248	lincRNA	chr1	203364732	203369257	+	4526	3274	MIDDLE	2	chr1	203366957	203367051	95	95	100	2.90165	84.0257	4	Both_SPL	L1MA9	LINE/L1	chr1	203366453	203367643	-	18.85	Ancient
XLOC_000529	linc-PRELP-1	TCONS_00001248	lincRNA	chr1	203364732	203369257	+	4526	3274	LAST	3	chr1	203367603	203369257	1655	308	18.6103	9.40745	84.0257	4	exonized	AluSx	SINE/Alu	chr1	203368811	203369118	+	11.66	LineageSpe
XLOC_000529	linc-PRELP-1	TCONS_00001248	lincRNA	chr1	203364732	203369257	+	4526	3274	LAST	3	chr1	203367603	203369257	1655	80	4.83384	2.44349	84.0257	4	exonized	L1MA9	LINE/L1	chr1	203368729	203368808	-	18.85	Ancient
XLOC_000529	linc-PRELP-1	TCONS_00001248	lincRNA	chr1	203364732	203369257	+	4526	3274	FIRST	1	chr1	203364732	203366255	1524	307	20.1444	9.37691	84.0257	4	exonized	AluSz6	SINE/Alu	chr1	203365425	203365731	-	13.16	LineageSpe
XLOC_000529	linc-PRELP-1	TCONS_00001248	lincRNA	chr1	203364732	203369257	+	4526	3274	LAST	3	chr1	203367603	203369257	1655	368	22.2356	11.2401	84.0257	4	exonized	L1MA9	LINE/L1	chr1	203367774	203368141	-	18.85	Ancient
XLOC_000529	linc-PRELP-1	TCONS_00001248	lincRNA	chr1	203364732	203369257	+	4526	3274	FIRST	1	chr1	203364732	203366255	1524	355	23.294	10.843	84.0257	4	exonized	L2a	LINE/L2	chr1	203365790	203366144	+	29.37	Ancient
XLOC_000529	linc-PRELP-1	TCONS_00001248	lincRNA	chr1	203364732	203369257	+	4526	3274	FIRST	1	chr1	203364732	203366255	1524	131	8.5958	4.00122	84.0257	4	TSS	L1MEc	LINE/L1	chr1	203364220	203364862	-	25.01	Ancient
XLOC_000529	linc-PRELP-1	TCONS_00001248	lincRNA	chr1	203364732	203369257	+	4526	3274	LAST	3	chr1	203367603	203369257	1655	130	7.85498	3.97068	84.0257	4	exonized	FLAM_C	SINE/Alu	chr1	203367644	203367773	+	15.79	LineageSpe
XLOC_000529	linc-PRELP-1	TCONS_00001248	lincRNA	chr1	203364732	203369257	+	4526	3274	FIRST	1	chr1	203364732	203366255	1524	57	3.74016	1.74099	84.0257	4	exonized	L1MEc	LINE/L1	chr1	203365732	203365788	-	25.01	Ancient
XLOC_000529	linc-PRELP-1	TCONS_00001248	lincRNA	chr1	203364732	203369257	+	4526	3274	LAST	3	chr1	203367603	203369257	1655	293	17.7039	8.9493	84.0257	4	exonized	L1MA9	LINE/L1	chr1	203368400	203368692	-	18.85	Ancient
XLOC_000529	linc-PRELP-1	TCONS_00001248	lincRNA	chr1	203364732	203369257	+	4526	3274	FIRST	1	chr1	203364732	203366255	1524	586	38.4514	17.8986	84.0257	4	exonized	L1MEc	LINE/L1	chr1	203364839	203365424	-	25.01	Ancient
XLOC_000529	linc-PRELP-1	TCONS_00002218	lincRNA	chr1	203343730	203369257	+	25528	2298	FIRST	1	chr1	203343730	203343857	128	65	50.7812	2.82855	60.0522	4	SPL	Tigger1	DNA/TcMar-Tigger	chr1	203343793	203344993	-	13.75	LineageSpe
XLOC_000529	linc-PRELP-1	TCONS_00002218	lincRNA	chr1	203343730	203369257	+	25528	2298	LAST	6	chr1	203367603	203369257	1655	41	2.47734	1.78416	60.0522	4	SPL	L1MA9	LINE/L1	chr1	203366453	203367643	-	18.85	Ancient
XLOC_000529	linc-PRELP-1	TCONS_00002218	lincRNA	chr1	203343730	203369257	+	25528	2298	MIDDLE	5	chr1	203366957	203367051	95	95	100	4.13403	60.0522	4	Both_SPL	L1MA9	LINE/L1	chr1	203366453	203367643	-	18.85	Ancient
XLOC_000529	linc-PRELP-1	TCONS_00002218	lincRNA	chr1	203343730	203369257	+	25528	2298	LAST	6	chr1	203367603	203369257	1655	308	18.6103	13.403	60.0522	4	exonized	AluSx	SINE/Alu	chr1	203368811	203369118	+	11.66	LineageSpe
XLOC_000529	linc-PRELP-1	TCONS_00002218	lincRNA	chr1	203343730	203369257	+	25528	2298	LAST	6	chr1	203367603	203369257	1655	80	4.83384	3.48129	60.0522	4	exonized	L1MA9	LINE/L1	chr1	203368729	203368808	-	18.85	Ancient
XLOC_000529	linc-PRELP-1	TCONS_00002218	lincRNA	chr1	203343730	203369257	+	25528	2298	LAST	6	chr1	203367603	203369257	1655	368	22.2356	16.0139	60.0522	4	exonized	L1MA9	LINE/L1	chr1	203367774	203368141	-	18.85	Ancient
XLOC_000529	linc-PRELP-1	TCONS_00002218	lincRNA	chr1	203343730	203369257	+	25528	2298	LAST	6	chr1	203367603	203369257	1655	130	7.85498	5.65709	60.0522	4	exonized	FLAM_C	SINE/Alu	chr1	203367644	203367773	+	15.79	LineageSpe
XLOC_000529	linc-PRELP-1	TCONS_00002218	lincRNA	chr1	203343730	203369257	+	25528	2298	LAST	6	chr1	203367603	203369257	1655	293	17.7039	12.7502	60.0522	4	exonized	L1MA9	LINE/L1	chr1	203368400	203368692	-	18.85	Ancient
XLOC_000529	linc-PRELP-1	TCONS_00002219	lincRNA	chr1	203343730	203369257	+	25528	3320	LAST	6	chr1	203367603	203369257	1655	41	2.47734	1.23494	72.3795	4	SPL	L1MA9	LINE/L1	chr1	203366453	203367643	-	18.85	Ancient
XLOC_000529	linc-PRELP-1	TCONS_00002219	lincRNA	chr1	203343730	203369257	+	25528	3320	MIDDLE	5	chr1	203366957	203367051	95	95	100	2.86145	72.3795	4	Both_SPL	L1MA9	LINE/L1	chr1	203366453	203367643	-	18.85	Ancient
XLOC_000529	linc-PRELP-1	TCONS_00002219	lincRNA	chr1	203343730	203369257	+	25528	3320	LAST	6	chr1	203367603	203369257	1655	308	18.6103	9.27711	72.3795	4	exonized	AluSx	SINE/Alu	chr1	203368811	203369118	+	11.66	LineageSpe
XLOC_000529	linc-PRELP-1	TCONS_00002219	lincRNA	chr1	203343730	203369257	+	25528	3320	MIDDLE	4	chr1	203365121	203366255	1135	57	5.02203	1.71687	72.3795	4	exonized	L1MEc	LINE/L1	chr1	203365732	203365788	-	25.01	Ancient
XLOC_000529	linc-PRELP-1	TCONS_00002219	lincRNA	chr1	203343730	203369257	+	25528	3320	LAST	6	chr1	203367603	203369257	1655	80	4.83384	2.40964	72.3795	4	exonized	L1MA9	LINE/L1	chr1	203368729	203368808	-	18.85	Ancient
XLOC_000529	linc-PRELP-1	TCONS_00002219	lincRNA	chr1	203343730	203369257	+	25528	3320	MIDDLE	4	chr1	203365121	203366255	1135	307	27.0485	9.24699	72.3795	4	exonized	AluSz6	SINE/Alu	chr1	203365425	203365731	-	13.16	LineageSpe
XLOC_000529	linc-PRELP-1	TCONS_00002219	lincRNA	chr1	203343730	203369257	+	25528	3320	LAST	6	chr1	203367603	203369257	1655	368	22.2356	11.0843	72.3795	4	exonized	L1MA9	LINE/L1	chr1	203367774	203368141	-	18.85	Ancient
XLOC_000529	linc-PRELP-1	TCONS_00002219	lincRNA	chr1	203343730	203369257	+	25528	3320	MIDDLE	4	chr1	203365121	203366255	1135	355	31.2775	10.6928	72.3795	4	exonized	L2a	LINE/L2	chr1	203365790	203366144	+	29.37	Ancient
XLOC_000529	linc-PRELP-1	TCONS_00002219	lincRNA	chr1	203343730	203369257	+	25528	3320	FIRST	1	chr1	203343730	203343857	128	65	50.7812	1.95783	72.3795	4	SPL	Tigger1	DNA/TcMar-Tigger	chr1	203343793	203344993	-	13.75	LineageSpe
XLOC_000529	linc-PRELP-1	TCONS_00002219	lincRNA	chr1	203343730	203369257	+	25528	3320	LAST	6	chr1	203367603	203369257	1655	130	7.85498	3.91566	72.3795	4	exonized	FLAM_C	SINE/Alu	chr1	203367644	203367773	+	15.79	LineageSpe
XLOC_000529	linc-PRELP-1	TCONS_00002219	lincRNA	chr1	203343730	203369257	+	25528	3320	MIDDLE	4	chr1	203365121	203366255	1135	304	26.7841	9.15663	72.3795	4	SPL	L1MEc	LINE/L1	chr1	203364839	203365424	-	25.01	Ancient
XLOC_000529	linc-PRELP-1	TCONS_00002219	lincRNA	chr1	203343730	203369257	+	25528	3320	LAST	6	chr1	203367603	203369257	1655	293	17.7039	8.8253	72.3795	4	exonized	L1MA9	LINE/L1	chr1	203368400	203368692	-	18.85	Ancient
XLOC_000533	linc-CDK18-1	TCONS_00000064	lincRNA	chr1	205425186	205438152	+	12967	2756	LAST	3	chr1	205435749	205438152	2404	141	5.86522	5.11611	49.2743	1	exonized	MIRb	SINE/MIR	chr1	205437893	205438033	+	29.76	Ancient
XLOC_000533	linc-CDK18-1	TCONS_00000064	lincRNA	chr1	205425186	205438152	+	12967	2756	LAST	3	chr1	205435749	205438152	2404	85	3.53577	3.08418	49.2743	1	exonized	MIR3	SINE/MIR	chr1	205436315	205436399	+	29.77	Ancient
XLOC_000533	linc-CDK18-1	TCONS_00000064	lincRNA	chr1	205425186	205438152	+	12967	2756	LAST	3	chr1	205435749	205438152	2404	307	12.7704	11.1393	49.2743	1	exonized	AluSx1	SINE/Alu	chr1	205437582	205437888	+	11.14	LineageSpe
XLOC_000533	linc-CDK18-1	TCONS_00000064	lincRNA	chr1	205425186	205438152	+	12967	2756	LAST	3	chr1	205435749	205438152	2404	170	7.07155	6.16836	49.2743	1	exonized	MIR	SINE/MIR	chr1	205436822	205436991	-	27.84	Ancient
XLOC_000533	linc-CDK18-1	TCONS_00000064	lincRNA	chr1	205425186	205438152	+	12967	2756	LAST	3	chr1	205435749	205438152	2404	297	12.3544	10.7765	49.2743	1	exonized	AluSz6	SINE/Alu	chr1	205436524	205436820	-	13.16	LineageSpe
XLOC_000533	linc-CDK18-1	TCONS_00000064	lincRNA	chr1	205425186	205438152	+	12967	2756	LAST	3	chr1	205435749	205438152	2404	358	14.8918	12.9898	49.2743	1	exonized	L3	LINE/CR1	chr1	205437222	205437579	+	32.5	Ancient
XLOC_000535	linc-FAM72A-3	TCONS_00001250	lincRNA	chr1	205744730	205752610	+	7881	803	LAST	2	chr1	205751861	205752610	750	124	16.5333	15.4421	15.4421	1	SPL	L1MC4	LINE/L1	chr1	205751817	205751984	-	25.02	Ancient
XLOC_000539	linc-CD55-1	TCONS_00000374	lincRNA	chr1	207422412	207482466	+	60055	917	MIDDLE	2	chr1	207438342	207438381	40	40	100	4.36205	66.7394	1	Both_SPL	MLT2B3	LTR/ERVL	chr1	207437879	207438393	+	20.99	Ancient
XLOC_000539	linc-CD55-1	TCONS_00000374	lincRNA	chr1	207422412	207482466	+	60055	917	LAST	4	chr1	207481812	207482466	655	519	79.2366	56.5976	66.7394	1	SPL	HAL1	LINE/L1	chr1	207481359	207482330	+	27.91	Ancient
XLOC_000539	linc-CD55-1	TCONS_00000374	lincRNA	chr1	207422412	207482466	+	60055	917	MIDDLE	3	chr1	207475115	207475252	138	53	38.4058	5.77972	66.7394	1	SPL	L2b	LINE/L2	chr1	207475064	207475167	-	32.38	Ancient
XLOC_000540	linc-CR2-2	TCONS_00001252	lincRNA	chr1	207558529	207560344	+	1816	1017	LAST	2	chr1	207559551	207560344	794	613	77.204	60.2753	82.2026	1	PolyA	L1MA4	LINE/L1	chr1	207559732	207562670	+	16.93	Ancient
XLOC_000540	linc-CR2-2	TCONS_00001252	lincRNA	chr1	207558529	207560344	+	1816	1017	FIRST	1	chr1	207558529	207558751	223	223	100	21.9272	82.2026	1	TSS_SPL	L2	LINE/L2	chr1	207558229	207558872	-	32.38	Ancient
XLOC_000541	linc-CR2-1	TCONS_00001253	lincRNA	chr1	207589903	207597521	+	7619	202	LAST	2	chr1	207597375	207597521	147	147	100	72.7723	72.7723	1	PolyA_SPL	HERVL18-int	LTR/ERVL	chr1	207595804	207597544	-	16.79	LineageSpe
XLOC_000542	linc-LOC642587-7	TCONS_00001254	lincRNA	chr1	208132709	208134955	+	2247	834	LAST	3	chr1	208134666	208134955	290	290	100	34.7722	42.9257	1	PolyA_SPL	MLT1D	LTR/ERVL-MaLR	chr1	208134586	208135024	-	21.73	Ancient
XLOC_000542	linc-LOC642587-7	TCONS_00001254	lincRNA	chr1	208132709	208134955	+	2247	834	MIDDLE	2	chr1	208133460	208133527	68	68	100	8.15348	42.9257	1	Both_SPL	MIRb	SINE/MIR	chr1	208133377	208133583	-	29.76	Ancient
XLOC_000543	linc-LOC642587-6	TCONS_00001255	lincRNA	chr1	208136996	208139265	+	2270	1708	LAST	2	chr1	208137871	208139265	1395	171	12.2581	10.0117	23.3607	1	exonized	L2a	LINE/L2	chr1	208138539	208138709	-	29.37	Ancient
XLOC_000543	linc-LOC642587-6	TCONS_00001255	lincRNA	chr1	208136996	208139265	+	2270	1708	LAST	2	chr1	208137871	208139265	1395	118	8.45878	6.90867	23.3607	1	exonized	MIR3	SINE/MIR	chr1	208138437	208138554	-	29.77	Ancient
XLOC_000543	linc-LOC642587-6	TCONS_00001255	lincRNA	chr1	208136996	208139265	+	2270	1708	LAST	2	chr1	208137871	208139265	1395	110	7.8853	6.44028	23.3607	1	exonized	L2c	LINE/L2	chr1	208138797	208138906	-	32.46	Ancient
XLOC_000544	linc-LOC642587-5	TCONS_00001256	lincRNA	chr1	208434038	208440263	+	6226	474	FIRST	1	chr1	208434038	208434120	83	83	100	17.5105	17.5105	1	TSS_SPL	L1MC5	LINE/L1	chr1	208433794	208434490	+	23.77	Ancient
XLOC_000545	linc-LOC642587-4	TCONS_00000375	lincRNA	chr1	208902033	208906529	+	4497	527	LAST	4	chr1	208906443	208906529	87	47	54.023	8.91841	27.704	5	SPL	MIRb	SINE/MIR	chr1	208906332	208906489	-	29.76	Ancient
XLOC_000545	linc-LOC642587-4	TCONS_00000375	lincRNA	chr1	208902033	208906529	+	4497	527	MIDDLE	2	chr1	208902488	208902622	135	99	73.3333	18.7856	27.704	5	SPL	MER74A	LTR/ERVL	chr1	208902074	208902586	-	21.02	Ancient
XLOC_000545	linc-LOC642587-4	TCONS_00001257	lincRNA	chr1	208901290	208910042	+	8753	2266	LAST	5	chr1	208909462	208910042	581	209	35.9725	9.2233	49.9559	5	exonized	L2c	LINE/L2	chr1	208909513	208909721	-	32.46	Ancient
XLOC_000545	linc-LOC642587-4	TCONS_00001257	lincRNA	chr1	208901290	208910042	+	8753	2266	MIDDLE	2	chr1	208902488	208902622	135	99	73.3333	4.36893	49.9559	5	SPL	MER74A	LTR/ERVL	chr1	208902074	208902586	-	21.02	Ancient
XLOC_000545	linc-LOC642587-4	TCONS_00001257	lincRNA	chr1	208901290	208910042	+	8753	2266	MIDDLE	4	chr1	208906835	208907391	557	160	28.7253	7.0609	49.9559	5	exonized	MIR3	SINE/MIR	chr1	208906982	208907141	-	29.77	Ancient
XLOC_000545	linc-LOC642587-4	TCONS_00001257	lincRNA	chr1	208901290	208910042	+	8753	2266	LAST	5	chr1	208909462	208910042	581	105	18.0723	4.63372	49.9559	5	exonized	MER5A	DNA/hAT-Charlie	chr1	208909723	208909827	-	25.27	Ancient
XLOC_000545	linc-LOC642587-4	TCONS_00001257	lincRNA	chr1	208901290	208910042	+	8753	2266	FIRST	1	chr1	208901290	208902074	785	425	54.1401	18.7555	49.9559	5	exonized	LTR16B1	LTR/ERVL	chr1	208901489	208901913	+	27.39	Ancient
XLOC_000545	linc-LOC642587-4	TCONS_00001257	lincRNA	chr1	208901290	208910042	+	8753	2266	FIRST	1	chr1	208901290	208902074	785	134	17.0701	5.9135	49.9559	5	TSS	LTR78	LTR/ERV1	chr1	208901202	208901423	-	31.03	Ancient
XLOC_000545	linc-LOC642587-4	TCONS_00001258	lincRNA	chr1	208902065	208910106	+	8042	1599	LAST	5	chr1	208909423	208910106	684	55	8.04094	3.43965	41.3383	5	PolyA	AluY	SINE/Alu	chr1	208910052	208910358	+	6.92	LineageSpe
XLOC_000545	linc-LOC642587-4	TCONS_00001258	lincRNA	chr1	208902065	208910106	+	8042	1599	LAST	5	chr1	208909423	208910106	684	33	4.82456	2.06379	41.3383	5	SPL	MLT1K	LTR/ERVL-MaLR	chr1	208909362	208909455	+	29.25	Ancient
XLOC_000545	linc-LOC642587-4	TCONS_00001258	lincRNA	chr1	208902065	208910106	+	8042	1599	MIDDLE	4	chr1	208906835	208907391	557	160	28.7253	10.0063	41.3383	5	exonized	MIR3	SINE/MIR	chr1	208906982	208907141	-	29.77	Ancient
XLOC_000545	linc-LOC642587-4	TCONS_00001258	lincRNA	chr1	208902065	208910106	+	8042	1599	MIDDLE	2	chr1	208902488	208902622	135	99	73.3333	6.19137	41.3383	5	SPL	MER74A	LTR/ERVL	chr1	208902074	208902586	-	21.02	Ancient
XLOC_000545	linc-LOC642587-4	TCONS_00001258	lincRNA	chr1	208902065	208910106	+	8042	1599	LAST	5	chr1	208909423	208910106	684	209	30.5556	13.0707	41.3383	5	exonized	L2c	LINE/L2	chr1	208909513	208909721	-	32.46	Ancient
XLOC_000545	linc-LOC642587-4	TCONS_00001258	lincRNA	chr1	208902065	208910106	+	8042	1599	LAST	5	chr1	208909423	208910106	684	105	15.3509	6.5666	41.3383	5	exonized	MER5A	DNA/hAT-Charlie	chr1	208909723	208909827	-	25.27	Ancient
XLOC_000545	linc-LOC642587-4	TCONS_00002225	lincRNA	chr1	208902050	208910106	+	8057	1609	LAST	5	chr1	208909423	208910106	684	55	8.04094	3.41827	41.0814	5	PolyA	AluY	SINE/Alu	chr1	208910052	208910358	+	6.92	LineageSpe
XLOC_000545	linc-LOC642587-4	TCONS_00002225	lincRNA	chr1	208902050	208910106	+	8057	1609	LAST	5	chr1	208909423	208910106	684	33	4.82456	2.05096	41.0814	5	SPL	MLT1K	LTR/ERVL-MaLR	chr1	208909362	208909455	+	29.25	Ancient
XLOC_000545	linc-LOC642587-4	TCONS_00002225	lincRNA	chr1	208902050	208910106	+	8057	1609	MIDDLE	4	chr1	208906835	208907391	557	160	28.7253	9.94406	41.0814	5	exonized	MIR3	SINE/MIR	chr1	208906982	208907141	-	29.77	Ancient
XLOC_000545	linc-LOC642587-4	TCONS_00002225	lincRNA	chr1	208902050	208910106	+	8057	1609	MIDDLE	2	chr1	208902488	208902622	135	99	73.3333	6.15289	41.0814	5	SPL	MER74A	LTR/ERVL	chr1	208902074	208902586	-	21.02	Ancient
XLOC_000545	linc-LOC642587-4	TCONS_00002225	lincRNA	chr1	208902050	208910106	+	8057	1609	LAST	5	chr1	208909423	208910106	684	209	30.5556	12.9894	41.0814	5	exonized	L2c	LINE/L2	chr1	208909513	208909721	-	32.46	Ancient
XLOC_000545	linc-LOC642587-4	TCONS_00002225	lincRNA	chr1	208902050	208910106	+	8057	1609	LAST	5	chr1	208909423	208910106	684	105	15.3509	6.52579	41.0814	5	exonized	MER5A	DNA/hAT-Charlie	chr1	208909723	208909827	-	25.27	Ancient
XLOC_000545	linc-LOC642587-4	TCONS_00002226	lincRNA	chr1	208902590	208909619	+	7030	956	LAST	4	chr1	208909462	208909619	158	107	67.7215	11.1925	27.9289	5	PolyA	L2c	LINE/L2	chr1	208909513	208909721	-	32.46	Ancient
XLOC_000545	linc-LOC642587-4	TCONS_00002226	lincRNA	chr1	208902590	208909619	+	7030	956	MIDDLE	3	chr1	208906835	208907391	557	160	28.7253	16.7364	27.9289	5	exonized	MIR3	SINE/MIR	chr1	208906982	208907141	-	29.77	Ancient
XLOC_000546	linc-LOC642587-3	TCONS_00000376	lincRNA	chr1	209145799	209148652	+	2854	595	FIRST	1	chr1	209145799	209146121	323	15	4.64396	2.52101	2.52101	1	SPL	L1ME4c	LINE/L1	chr1	209146107	209146477	-	27.93	Ancient
XLOC_000549	linc-DTL-3	TCONS_00000380	lincRNA	chr1	211809248	211816209	+	6962	585	FIRST	1	chr1	211809248	211809787	540	111	20.5556	18.9744	29.7436	1	SPL	FLAM_A	SINE/Alu	chr1	211809677	211809803	+	18.67	LineageSpe
XLOC_000549	linc-DTL-3	TCONS_00000380	lincRNA	chr1	211809248	211816209	+	6962	585	FIRST	1	chr1	211809248	211809787	540	63	11.6667	10.7692	29.7436	1	exonized	L1M3	LINE/L1	chr1	211809612	211809674	+	18.95	Ancient
XLOC_000550	linc-DTL-2	TCONS_00000381	lincRNA	chr1	211849104	211860132	+	11029	755	LAST	4	chr1	211859812	211860132	321	38	11.838	5.03311	35.6291	5	PolyA	AluSx1	SINE/Alu	chr1	211860095	211860396	-	11.14	LineageSpe
XLOC_000550	linc-DTL-2	TCONS_00000381	lincRNA	chr1	211849104	211860132	+	11029	755	MIDDLE	3	chr1	211858908	211859148	241	161	66.805	21.3245	35.6291	5	SPL	MIRb	SINE/MIR	chr1	211858988	211859155	+	29.76	Ancient
XLOC_000550	linc-DTL-2	TCONS_00000381	lincRNA	chr1	211849104	211860132	+	11029	755	MIDDLE	2	chr1	211850409	211850496	88	70	79.5455	9.27152	35.6291	5	SPL	MSTD	LTR/ERVL-MaLR	chr1	211850427	211850797	+	20.45	LineageSpe
XLOC_000550	linc-DTL-2	TCONS_00000382	lincRNA	chr1	211855106	211860801	+	5696	1846	MIDDLE	2	chr1	211856892	211856966	75	75	100	4.06284	57.909	5	Both_SPL	L2c	LINE/L2	chr1	211856261	211857046	-	32.46	Ancient
XLOC_000550	linc-DTL-2	TCONS_00000382	lincRNA	chr1	211855106	211860801	+	5696	1846	FIRST	1	chr1	211855106	211855206	101	101	100	5.47129	57.909	5	TSS_SPL	MLT1A0	LTR/ERVL-MaLR	chr1	211854944	211855273	+	19.59	Ancient
XLOC_000550	linc-DTL-2	TCONS_00000382	lincRNA	chr1	211855106	211860801	+	5696	1846	MIDDLE	4	chr1	211857996	211858294	299	39	13.0435	2.11268	57.909	5	SPL	MIRb	SINE/MIR	chr1	211858256	211858400	-	29.76	Ancient
XLOC_000550	linc-DTL-2	TCONS_00000382	lincRNA	chr1	211855106	211860801	+	5696	1846	LAST	6	chr1	211859812	211860801	990	302	30.5051	16.3597	57.909	5	exonized	AluSx1	SINE/Alu	chr1	211860095	211860396	-	11.14	LineageSpe
XLOC_000550	linc-DTL-2	TCONS_00000382	lincRNA	chr1	211855106	211860801	+	5696	1846	MIDDLE	5	chr1	211858908	211859134	227	147	64.7577	7.96316	57.909	5	SPL	MIRb	SINE/MIR	chr1	211858988	211859155	+	29.76	Ancient
XLOC_000550	linc-DTL-2	TCONS_00000382	lincRNA	chr1	211855106	211860801	+	5696	1846	LAST	6	chr1	211859812	211860801	990	405	40.9091	21.9393	57.909	5	PolyA	LTR2	LTR/ERV1	chr1	211860397	211860843	+	8.54	LineageSpe
XLOC_000550	linc-DTL-2	TCONS_00000383	lincRNA	chr1	211859864	211863445	+	3582	461	LAST	3	chr1	211863288	211863445	158	158	100	34.2733	86.7679	5	PolyA_SPL	Harlequin-int	LTR/ERV1	chr1	211861234	211867461	+	8.27	LineageSpe
XLOC_000550	linc-DTL-2	TCONS_00000383	lincRNA	chr1	211859864	211863445	+	3582	461	MIDDLE	2	chr1	211860868	211861109	242	242	100	52.4946	86.7679	5	Both_SPL	HERVE_a-int	LTR/ERV1	chr1	211860844	211861240	+	11.04	LineageSpe
XLOC_000550	linc-DTL-2	TCONS_00001260	lincRNA	chr1	211849016	211860141	+	11126	611	LAST	3	chr1	211859812	211860141	330	47	14.2424	7.69231	19.1489	5	PolyA	AluSx1	SINE/Alu	chr1	211860095	211860396	-	11.14	LineageSpe
XLOC_000550	linc-DTL-2	TCONS_00001260	lincRNA	chr1	211849016	211860141	+	11126	611	MIDDLE	2	chr1	211850409	211850496	88	70	79.5455	11.4566	19.1489	5	SPL	MSTD	LTR/ERVL-MaLR	chr1	211850427	211850797	+	20.45	LineageSpe
XLOC_000550	linc-DTL-2	TCONS_00001261	lincRNA	chr1	211856053	211858284	+	2232	1203	LAST	2	chr1	211857996	211858284	289	29	10.0346	2.41064	68.5786	5	PolyA	MIRb	SINE/MIR	chr1	211858256	211858400	-	29.76	Ancient
XLOC_000550	linc-DTL-2	TCONS_00001261	lincRNA	chr1	211856053	211858284	+	2232	1203	FIRST	1	chr1	211856053	211856966	914	90	9.84683	7.4813	68.5786	5	TSS	L2c	LINE/L2	chr1	211856048	211856142	-	32.46	Ancient
XLOC_000550	linc-DTL-2	TCONS_00001261	lincRNA	chr1	211856053	211858284	+	2232	1203	FIRST	1	chr1	211856053	211856966	914	706	77.2429	58.6866	68.5786	5	SPL	L2c	LINE/L2	chr1	211856261	211857046	-	32.46	Ancient
XLOC_000551	linc-DTL-1	TCONS_00001262	lincRNA	chr1	211899562	211901111	+	1550	296	LAST	2	chr1	211901033	211901111	79	79	100	26.6892	87.5	1	PolyA_SPL	MSTB	LTR/ERVL-MaLR	chr1	211900765	211901175	+	16.86	LineageSpe
XLOC_000551	linc-DTL-1	TCONS_00001262	lincRNA	chr1	211899562	211901111	+	1550	296	FIRST	1	chr1	211899562	211899778	217	71	32.7189	23.9865	87.5	1	TSS	L2c	LINE/L2	chr1	211899361	211899632	-	32.46	Ancient
XLOC_000551	linc-DTL-1	TCONS_00001262	lincRNA	chr1	211899562	211901111	+	1550	296	FIRST	1	chr1	211899562	211899778	217	109	50.2304	36.8243	87.5	1	SPL	MLT1K	LTR/ERVL-MaLR	chr1	211899670	211900149	-	29.25	Ancient
XLOC_000553	linc-PPP2R5A-1	TCONS_00000386	lincRNA	chr1	212341549	212363601	+	22053	510	FIRST	1	chr1	212341549	212341607	59	59	100	11.5686	74.3137	1	TSS_SPL	MLT1A1	LTR/ERVL-MaLR	chr1	212341360	212341684	+	19.28	Ancient
XLOC_000553	linc-PPP2R5A-1	TCONS_00000386	lincRNA	chr1	212341549	212363601	+	22053	510	LAST	4	chr1	212363383	212363601	219	198	90.411	38.8235	74.3137	1	PolyA	SVA_F	Other	chr1	212363404	212363794	+	6.7	LineageSpe
XLOC_000553	linc-PPP2R5A-1	TCONS_00000386	lincRNA	chr1	212341549	212363601	+	22053	510	MIDDLE	2	chr1	212341936	212342057	122	122	100	23.9216	74.3137	1	Both_SPL	AluY	SINE/Alu	chr1	212341917	212342214	-	6.92	LineageSpe
XLOC_000554	linc-ATF3-2	TCONS_00000387	lincRNA	chr1	212719036	212729407	+	10372	332	LAST	3	chr1	212729185	212729407	223	174	78.0269	52.4096	52.4096	1	SPL	L1ME1	LINE/L1	chr1	212729184	212729358	+	24.03	Ancient
XLOC_000555	linc-ATF3-1	TCONS_00001266	lincRNA	chr1	212731196	212734165	+	2970	1868	MIDDLE	2	chr1	212732498	212733380	883	60	6.79502	3.21199	16.167	3	exonized	L2b	LINE/L2	chr1	212732666	212732725	+	32.38	Ancient
XLOC_000555	linc-ATF3-1	TCONS_00001266	lincRNA	chr1	212731196	212734165	+	2970	1868	FIRST	1	chr1	212731196	212732111	916	30	3.27511	1.606	16.167	3	exonized	MIRb	SINE/MIR	chr1	212732030	212732059	-	29.76	Ancient
XLOC_000555	linc-ATF3-1	TCONS_00001266	lincRNA	chr1	212731196	212734165	+	2970	1868	MIDDLE	2	chr1	212732498	212733380	883	212	24.0091	11.349	16.167	3	exonized	MIRb	SINE/MIR	chr1	212733067	212733278	-	29.76	Ancient
XLOC_000555	linc-ATF3-1	TCONS_00001268	lincRNA	chr1	212733389	212734736	+	1348	1090	LAST	2	chr1	212734097	212734736	640	91	14.2188	8.34862	8.34862	3	exonized	MIR3	SINE/MIR	chr1	212734300	212734390	-	29.77	Ancient
XLOC_000556	linc-TATDN3-1	TCONS_00001269	lincRNA	chr1	212840987	212847401	+	6415	239	LAST	2	chr1	212847267	212847401	135	135	100	56.4854	56.4854	3	PolyA_SPL	AluJb	SINE/Alu	chr1	212847247	212847555	-	16.49	LineageSpe
XLOC_000556	linc-TATDN3-1	TCONS_00001270	lincRNA	chr1	212840987	212848586	+	7600	611	LAST	3	chr1	212848206	212848586	381	381	100	62.3568	82.9787	3	PolyA_SPL	MLT1J	LTR/ERVL-MaLR	chr1	212848180	212848633	+	28.52	Ancient
XLOC_000556	linc-TATDN3-1	TCONS_00001270	lincRNA	chr1	212840987	212848586	+	7600	611	MIDDLE	2	chr1	212847267	212847392	126	126	100	20.6219	82.9787	3	Both_SPL	AluJb	SINE/Alu	chr1	212847247	212847555	-	16.49	LineageSpe
XLOC_000556	linc-TATDN3-1	TCONS_00002229	lincRNA	chr1	212847302	212848581	+	1280	467	LAST	2	chr1	212848206	212848581	376	376	100	80.5139	100	3	PolyA_SPL	MLT1J	LTR/ERVL-MaLR	chr1	212848180	212848633	+	28.52	Ancient
XLOC_000556	linc-TATDN3-1	TCONS_00002229	lincRNA	chr1	212847302	212848581	+	1280	467	FIRST	1	chr1	212847302	212847392	91	91	100	19.4861	100	3	TSS_SPL	AluJb	SINE/Alu	chr1	212847247	212847555	-	16.49	LineageSpe
XLOC_000561	linc-RRP15-4	TCONS_00000391	lincRNA	chr1	218066243	218094146	+	27904	1586	LAST	4	chr1	218092926	218094146	1221	61	4.9959	3.84615	34.174	1	exonized	MIRc	SINE/MIR	chr1	218093117	218093177	-	29.57	Ancient
XLOC_000561	linc-RRP15-4	TCONS_00000391	lincRNA	chr1	218066243	218094146	+	27904	1586	FIRST	1	chr1	218066243	218066268	26	26	100	1.63934	34.174	1	TSS_SPL	Tigger7	DNA/TcMar-Tigger	chr1	218065952	218066496	-	18.11	Ancient
XLOC_000561	linc-RRP15-4	TCONS_00000391	lincRNA	chr1	218066243	218094146	+	27904	1586	LAST	4	chr1	218092926	218094146	1221	368	30.1392	23.203	34.174	1	PolyA	MLT1C	LTR/ERVL-MaLR	chr1	218093779	218094182	+	21.68	Ancient
XLOC_000561	linc-RRP15-4	TCONS_00000391	lincRNA	chr1	218066243	218094146	+	27904	1586	MIDDLE	2	chr1	218085097	218085323	227	87	38.326	5.4855	34.174	1	SPL	MIRb	SINE/MIR	chr1	218085237	218085371	-	29.76	Ancient
XLOC_000563	linc-RRP15-2	TCONS_00000393	lincRNA	chr1	218216847	218232482	+	15636	1728	LAST	4	chr1	218232076	218232482	407	148	36.3636	8.56481	65.2778	1	exonized	L2a	LINE/L2	chr1	218232212	218232359	-	29.37	Ancient
XLOC_000563	linc-RRP15-2	TCONS_00000393	lincRNA	chr1	218216847	218232482	+	15636	1728	FIRST	1	chr1	218216847	218217939	1093	17	1.55535	0.983796	65.2778	1	TSS	MIRc	SINE/MIR	chr1	218216697	218216863	-	29.57	Ancient
XLOC_000563	linc-RRP15-2	TCONS_00000393	lincRNA	chr1	218216847	218232482	+	15636	1728	MIDDLE	2	chr1	218219476	218219595	120	113	94.1667	6.53935	65.2778	1	SPL	MIR	SINE/MIR	chr1	218219483	218219625	+	27.84	Ancient
XLOC_000563	linc-RRP15-2	TCONS_00000393	lincRNA	chr1	218216847	218232482	+	15636	1728	MIDDLE	3	chr1	218224497	218224604	108	108	100	6.25	65.2778	1	Both_SPL	AluJb	SINE/Alu	chr1	218224468	218224764	-	16.49	LineageSpe
XLOC_000563	linc-RRP15-2	TCONS_00000393	lincRNA	chr1	218216847	218232482	+	15636	1728	LAST	4	chr1	218232076	218232482	407	122	29.9754	7.06019	65.2778	1	PolyA	MER46C	DNA/TcMar-Tigger	chr1	218232361	218232562	+	25.12	Ancient
XLOC_000563	linc-RRP15-2	TCONS_00000393	lincRNA	chr1	218216847	218232482	+	15636	1728	FIRST	1	chr1	218216847	218217939	1093	160	14.6386	9.25926	65.2778	1	exonized	L2a	LINE/L2	chr1	218216887	218217046	+	29.37	Ancient
XLOC_000563	linc-RRP15-2	TCONS_00000393	lincRNA	chr1	218216847	218232482	+	15636	1728	FIRST	1	chr1	218216847	218217939	1093	290	26.5325	16.7824	65.2778	1	exonized	AluJb	SINE/Alu	chr1	218217416	218217705	+	16.49	LineageSpe
XLOC_000563	linc-RRP15-2	TCONS_00000393	lincRNA	chr1	218216847	218232482	+	15636	1728	FIRST	1	chr1	218216847	218217939	1093	170	15.5535	9.83796	65.2778	1	exonized	L1MA10	LINE/L1	chr1	218217216	218217385	-	19.5	Ancient
XLOC_000565	linc-LYPLAL1-1	TCONS_00001276	lincRNA	chr1	219092186	219098202	+	6017	1164	LAST	2	chr1	219097803	219098202	400	140	35	12.0275	12.0275	3	exonized	Charlie4z	DNA/hAT-Charlie	chr1	219097925	219098064	-	26.08	Ancient
XLOC_000565	linc-LYPLAL1-1	TCONS_00001277	lincRNA	chr1	219092223	219098202	+	5980	716	LAST	3	chr1	219097803	219098202	400	140	35	19.5531	19.5531	3	exonized	Charlie4z	DNA/hAT-Charlie	chr1	219097925	219098064	-	26.08	Ancient
XLOC_000565	linc-LYPLAL1-1	TCONS_00002231	lincRNA	chr1	219092182	219098186	+	6005	791	LAST	3	chr1	219097803	219098186	384	140	36.4583	17.6991	17.6991	3	exonized	Charlie4z	DNA/hAT-Charlie	chr1	219097925	219098064	-	26.08	Ancient
XLOC_000566	linc-IARS2-3	TCONS_00001278	lincRNA	chr1	219391858	219467786	+	75929	265	FIRST	1	chr1	219391858	219392054	197	99	50.2538	37.3585	37.3585	4	TSS	MER30	DNA/hAT-Charlie	chr1	219391744	219391956	+	11.13	LineageSpe
XLOC_000566	linc-IARS2-3	TCONS_00001280	lincRNA	chr1	219467501	219500273	+	32773	1119	FIRST	1	chr1	219467501	219468493	993	391	39.3756	34.9419	38.1591	4	exonized	LTR16	LTR/ERVL	chr1	219468060	219468450	-	27.41	LineageSpe
XLOC_000566	linc-IARS2-3	TCONS_00001280	lincRNA	chr1	219467501	219500273	+	32773	1119	FIRST	1	chr1	219467501	219468493	993	36	3.62538	3.21716	38.1591	4	SPL	MIR	SINE/MIR	chr1	219468458	219468518	+	27.84	Ancient
XLOC_000566	linc-IARS2-3	TCONS_00002232	lincRNA	chr1	219391858	219419234	+	27377	341	FIRST	1	chr1	219391858	219392054	197	99	50.2538	29.0323	29.0323	4	TSS	MER30	DNA/hAT-Charlie	chr1	219391744	219391956	+	11.13	LineageSpe
XLOC_000569	linc-MARK1-3	TCONS_00001282	lincRNA	chr1	220552594	220554659	+	2066	773	FIRST	1	chr1	220552594	220552921	328	328	100	42.4321	42.4321	1	TSS_SPL	LTR1A2	LTR/ERV1	chr1	220552304	220552940	-	12.54	LineageSpe
XLOC_000570	linc-MARK1-2	TCONS_00001283	lincRNA	chr1	220605800	220608985	+	3186	202	LAST	2	chr1	220608966	220608985	20	20	100	9.90099	100	1	PolyA_SPL	MLT1J2	LTR/ERVL-MaLR	chr1	220608761	220609167	+	28.4	Ancient
XLOC_000570	linc-MARK1-2	TCONS_00001283	lincRNA	chr1	220605800	220608985	+	3186	202	FIRST	1	chr1	220605800	220605981	182	182	100	90.099	100	1	TSS_SPL	MLT2F	LTR/ERVL	chr1	220605714	220606206	-	27.09	Ancient
XLOC_000571	linc-MARK1-1	TCONS_00001284	lincRNA	chr1	220667811	220674043	+	6233	367	LAST	2	chr1	220673812	220674043	232	232	100	63.2153	100	1	PolyA_SPL	MLT1F2	LTR/ERVL-MaLR	chr1	220673595	220674111	+	24.38	Ancient
XLOC_000571	linc-MARK1-1	TCONS_00001284	lincRNA	chr1	220667811	220674043	+	6233	367	FIRST	1	chr1	220667811	220667945	135	135	100	36.7847	100	1	TSS_SPL	AluJo	SINE/Alu	chr1	220667785	220668084	-	16.42	LineageSpe
XLOC_000572	linc-HLX-1	TCONS_00000065	lincRNA	chr1	221002597	221005768	+	3172	959	LAST	4	chr1	221005455	221005768	314	128	40.7643	13.3472	63.7122	1	SPL	L2c	LINE/L2	chr1	221005423	221005582	+	32.46	Ancient
XLOC_000572	linc-HLX-1	TCONS_00000065	lincRNA	chr1	221002597	221005768	+	3172	959	MIDDLE	3	chr1	221004484	221004725	242	46	19.0083	4.79666	63.7122	1	SPL	MER102b	DNA/hAT-Charlie	chr1	221004429	221004529	-	28.77	Ancient
XLOC_000572	linc-HLX-1	TCONS_00000065	lincRNA	chr1	221002597	221005768	+	3172	959	FIRST	1	chr1	221002597	221002784	188	188	100	19.6038	63.7122	1	TSS_SPL	L2b	LINE/L2	chr1	221002559	221002853	-	32.38	Ancient
XLOC_000572	linc-HLX-1	TCONS_00000065	lincRNA	chr1	221002597	221005768	+	3172	959	MIDDLE	3	chr1	221004484	221004725	242	196	80.9917	20.438	63.7122	1	SPL	MLT2B2	LTR/ERVL	chr1	221004530	221005015	-	18.93	Ancient
XLOC_000572	linc-HLX-1	TCONS_00000065	lincRNA	chr1	221002597	221005768	+	3172	959	MIDDLE	2	chr1	221004035	221004249	215	53	24.6512	5.52659	63.7122	1	SPL	MIR3	SINE/MIR	chr1	221003966	221004087	+	29.77	Ancient
XLOC_000575	linc-MIA3-2	TCONS_00000394	lincRNA	chr1	222139683	222156485	+	16803	455	MIDDLE	2	chr1	222141690	222141838	149	149	100	32.7473	68.3516	2	Both_SPL	HERVH-int	LTR/ERV1	chr1	222139699	222144534	+	12.07	LineageSpe
XLOC_000575	linc-MIA3-2	TCONS_00000394	lincRNA	chr1	222139683	222156485	+	16803	455	FIRST	1	chr1	222139683	222139844	162	16	9.87654	3.51648	68.3516	2	TSS	LTR7Y	LTR/ERV1	chr1	222139266	222139698	+	6.38	LineageSpe
XLOC_000575	linc-MIA3-2	TCONS_00000394	lincRNA	chr1	222139683	222156485	+	16803	455	FIRST	1	chr1	222139683	222139844	162	146	90.1235	32.0879	68.3516	2	SPL	HERVH-int	LTR/ERV1	chr1	222139699	222144534	+	12.07	LineageSpe
XLOC_000575	linc-MIA3-2	TCONS_00000395	lincRNA	chr1	222139752	222158306	+	18555	1148	LAST	3	chr1	222157396	222158306	911	330	36.2239	28.7456	60.453	2	PolyA	HSMAR2	DNA/TcMar-Mariner	chr1	222157977	222159320	+	13.42	LineageSpe
XLOC_000575	linc-MIA3-2	TCONS_00000395	lincRNA	chr1	222139752	222158306	+	18555	1148	FIRST	1	chr1	222139752	222139844	93	93	100	8.10105	60.453	2	TSS_SPL	HERVH-int	LTR/ERV1	chr1	222139699	222144534	+	12.07	LineageSpe
XLOC_000575	linc-MIA3-2	TCONS_00000395	lincRNA	chr1	222139752	222158306	+	18555	1148	LAST	3	chr1	222157396	222158306	911	271	29.7475	23.6063	60.453	2	SPL	LTR41	LTR/ERVL	chr1	222157249	222157666	-	23.54	Ancient
XLOC_000576	linc-MIA3-1	TCONS_00000396	lincRNA	chr1	222763273	222766075	+	2803	750	LAST	3	chr1	222765508	222766075	568	162	28.5211	21.6	59.3333	2	PolyA	L1MEf	LINE/L1	chr1	222765914	222766948	-	26.28	Ancient
XLOC_000576	linc-MIA3-1	TCONS_00000396	lincRNA	chr1	222763273	222766075	+	2803	750	MIDDLE	2	chr1	222763600	222763749	150	56	37.3333	7.46667	59.3333	2	SPL	L3	LINE/CR1	chr1	222763694	222764050	+	32.5	Ancient
XLOC_000576	linc-MIA3-1	TCONS_00000396	lincRNA	chr1	222763273	222766075	+	2803	750	LAST	3	chr1	222765508	222766075	568	227	39.9648	30.2667	59.3333	2	exonized	MLT1H1	LTR/ERVL-MaLR	chr1	222765643	222765869	+	27.43	Ancient
XLOC_000576	linc-MIA3-1	TCONS_00000397	lincRNA	chr1	222763304	222766374	+	3071	1313	FIRST	1	chr1	222763304	222763749	446	56	12.5561	4.26504	56.6641	2	SPL	L3	LINE/CR1	chr1	222763694	222764050	+	32.5	Ancient
XLOC_000576	linc-MIA3-1	TCONS_00000397	lincRNA	chr1	222763304	222766374	+	3071	1313	LAST	2	chr1	222765508	222766374	867	461	53.1719	35.1104	56.6641	2	PolyA	L1MEf	LINE/L1	chr1	222765914	222766948	-	26.28	Ancient
XLOC_000576	linc-MIA3-1	TCONS_00000397	lincRNA	chr1	222763304	222766374	+	3071	1313	LAST	2	chr1	222765508	222766374	867	227	26.1822	17.2887	56.6641	2	exonized	MLT1H1	LTR/ERVL-MaLR	chr1	222765643	222765869	+	27.43	Ancient
XLOC_000578	linc-C1orf65-2	TCONS_00001294	lincRNA	chr1	223316723	223321526	+	4804	515	LAST	2	chr1	223321230	223321526	297	297	100	57.6699	80	1	PolyA_SPL	MLT1F2	LTR/ERVL-MaLR	chr1	223321148	223321737	+	24.38	Ancient
XLOC_000578	linc-C1orf65-2	TCONS_00001294	lincRNA	chr1	223316723	223321526	+	4804	515	FIRST	1	chr1	223316723	223316940	218	115	52.7523	22.3301	80	1	exonized	MIRc	SINE/MIR	chr1	223316824	223316938	-	29.57	Ancient
XLOC_000580	linc-C1orf65-1	TCONS_00000409	lincRNA	chr1	223354486	223361496	+	7011	487	LAST	3	chr1	223361277	223361496	220	220	100	45.1745	69.4045	1	PolyA_SPL	L1MD1	LINE/L1	chr1	223360936	223361797	+	19.43	Ancient
XLOC_000580	linc-C1orf65-1	TCONS_00000409	lincRNA	chr1	223354486	223361496	+	7011	487	MIDDLE	2	chr1	223360173	223360290	118	118	100	24.23	69.4045	1	Both_SPL	AluJb	SINE/Alu	chr1	223360151	223360320	-	16.49	LineageSpe
XLOC_000584	linc-DNAH14-1	TCONS_00000410	lincRNA	chr1	224954602	224961043	+	6442	423	FIRST	1	chr1	224954602	224954855	254	98	38.5827	23.1678	32.6241	2	SPL	MIRc	SINE/MIR	chr1	224954758	224954895	+	29.57	Ancient
XLOC_000584	linc-DNAH14-1	TCONS_00000410	lincRNA	chr1	224954602	224961043	+	6442	423	FIRST	1	chr1	224954602	224954855	254	40	15.748	9.45626	32.6241	2	TSS	MamTip2	DNA/hAT-Tip100	chr1	224954534	224954641	-	31.67	Ancient
XLOC_000584	linc-DNAH14-1	TCONS_00001303	lincRNA	chr1	224954058	224967057	+	13000	981	LAST	2	chr1	224966875	224967057	183	35	19.1257	3.56779	26.4016	2	exonized	MER4B	LTR/ERV1	chr1	224967005	224967039	+	12.94	LineageSpe
XLOC_000584	linc-DNAH14-1	TCONS_00001303	lincRNA	chr1	224954058	224967057	+	13000	981	LAST	2	chr1	224966875	224967057	183	18	9.83607	1.83486	26.4016	2	PolyA	MSTA	LTR/ERVL-MaLR	chr1	224967040	224967436	-	14.8	LineageSpe
XLOC_000584	linc-DNAH14-1	TCONS_00001303	lincRNA	chr1	224954058	224967057	+	13000	981	FIRST	1	chr1	224954058	224954855	798	98	12.2807	9.98981	26.4016	2	SPL	MIRc	SINE/MIR	chr1	224954758	224954895	+	29.57	Ancient
XLOC_000584	linc-DNAH14-1	TCONS_00001303	lincRNA	chr1	224954058	224967057	+	13000	981	FIRST	1	chr1	224954058	224954855	798	108	13.5338	11.0092	26.4016	2	exonized	MamTip2	DNA/hAT-Tip100	chr1	224954534	224954641	-	31.67	Ancient
XLOC_000585	linc-SRP9-3	TCONS_00001304	lincRNA	chr1	225657547	225660157	+	2611	2269	LAST	2	chr1	225659565	225660157	593	38	6.40809	1.67475	38.9599	1	PolyA	AluJb	SINE/Alu	chr1	225660120	225660224	-	16.49	LineageSpe
XLOC_000585	linc-SRP9-3	TCONS_00001304	lincRNA	chr1	225657547	225660157	+	2611	2269	FIRST	1	chr1	225657547	225659222	1676	212	12.6492	9.34332	38.9599	1	exonized	MLT1B	LTR/ERVL-MaLR	chr1	225657827	225658038	+	18.85	Ancient
XLOC_000585	linc-SRP9-3	TCONS_00001304	lincRNA	chr1	225657547	225660157	+	2611	2269	LAST	2	chr1	225659565	225660157	593	287	48.398	12.6487	38.9599	1	exonized	ERV3-16A3_LTR	LTR/ERVL	chr1	225659762	225660048	+	28.14	Ancient
XLOC_000585	linc-SRP9-3	TCONS_00001304	lincRNA	chr1	225657547	225660157	+	2611	2269	FIRST	1	chr1	225657547	225659222	1676	67	3.99761	2.95284	38.9599	1	exonized	L2a	LINE/L2	chr1	225658491	225658557	+	29.37	Ancient
XLOC_000585	linc-SRP9-3	TCONS_00001304	lincRNA	chr1	225657547	225660157	+	2611	2269	FIRST	1	chr1	225657547	225659222	1676	280	16.7064	12.3402	38.9599	1	TSS	AluSx	SINE/Alu	chr1	225657519	225657826	+	11.66	LineageSpe
XLOC_000587	linc-SRP9-1	TCONS_00001306	lincRNA	chr1	225888415	225898540	+	10126	730	LAST	2	chr1	225898205	225898540	336	32	9.52381	4.38356	35.8904	4	PolyA	L2c	LINE/L2	chr1	225898509	225898793	-	32.46	Ancient
XLOC_000587	linc-SRP9-1	TCONS_00001306	lincRNA	chr1	225888415	225898540	+	10126	730	FIRST	1	chr1	225888415	225888808	394	230	58.3756	31.5068	35.8904	4	SPL	MLT1L	LTR/ERVL-MaLR	chr1	225888579	225888942	-	28.7	Ancient
XLOC_000587	linc-SRP9-1	TCONS_00001307	lincRNA	chr1	225888418	225904065	+	15648	709	LAST	2	chr1	225903748	225904065	318	318	100	44.8519	77.292	4	PolyA_SPL	LTR16A	LTR/ERVL	chr1	225903722	225904150	+	28.44	Ancient
XLOC_000587	linc-SRP9-1	TCONS_00001307	lincRNA	chr1	225888418	225904065	+	15648	709	FIRST	1	chr1	225888418	225888808	391	230	58.8235	32.4401	77.292	4	SPL	MLT1L	LTR/ERVL-MaLR	chr1	225888579	225888942	-	28.7	Ancient
XLOC_000587	linc-SRP9-1	TCONS_00001308	lincRNA	chr1	225888431	225904107	+	15677	804	LAST	3	chr1	225903748	225904107	360	360	100	44.7761	73.3831	4	PolyA_SPL	LTR16A	LTR/ERVL	chr1	225903722	225904150	+	28.44	Ancient
XLOC_000587	linc-SRP9-1	TCONS_00001308	lincRNA	chr1	225888431	225904107	+	15677	804	FIRST	1	chr1	225888431	225888808	378	230	60.8466	28.607	73.3831	4	SPL	MLT1L	LTR/ERVL-MaLR	chr1	225888579	225888942	-	28.7	Ancient
XLOC_000587	linc-SRP9-1	TCONS_00002241	lincRNA	chr1	225898090	225904316	+	6227	750	LAST	2	chr1	225903748	225904316	569	159	27.9438	21.2	82.6667	4	PolyA	ERV3-16A3_I-int	LTR/ERVL	chr1	225904158	225904505	+	28.49	Ancient
XLOC_000587	linc-SRP9-1	TCONS_00002241	lincRNA	chr1	225898090	225904316	+	6227	750	FIRST	1	chr1	225898090	225898270	181	58	32.0442	7.73333	82.6667	4	TSS	Arthur1B	DNA/hAT-Tip100	chr1	225898083	225898147	+	25.55	Ancient
XLOC_000587	linc-SRP9-1	TCONS_00002241	lincRNA	chr1	225898090	225904316	+	6227	750	LAST	2	chr1	225903748	225904316	569	403	70.826	53.7333	82.6667	4	SPL	LTR16A	LTR/ERVL	chr1	225903722	225904150	+	28.44	Ancient
XLOC_000592	linc-MIXL1-1	TCONS_00001313	lincRNA	chr1	226409812	226410285	+	474	360	FIRST	1	chr1	226409812	226409925	114	58	50.8772	16.1111	16.1111	1	TSS	AluSq2	SINE/Alu	chr1	226409788	226409869	-	10.62	LineageSpe
XLOC_000595	linc-PRSS38-1	TCONS_00001315	lincRNA	chr1	227976988	227979782	+	2795	2037	LAST	2	chr1	227978126	227979782	1657	27	1.62945	1.32548	25.3805	1	PolyA	Charlie15b	DNA/hAT-Charlie	chr1	227979756	227979840	+	26.71	Ancient
XLOC_000595	linc-PRSS38-1	TCONS_00001315	lincRNA	chr1	227976988	227979782	+	2795	2037	LAST	2	chr1	227978126	227979782	1657	305	18.4068	14.973	25.3805	1	exonized	AluSx1	SINE/Alu	chr1	227978283	227978587	-	11.14	LineageSpe
XLOC_000595	linc-PRSS38-1	TCONS_00001315	lincRNA	chr1	227976988	227979782	+	2795	2037	LAST	2	chr1	227978126	227979782	1657	185	11.1648	9.08198	25.3805	1	exonized	Charlie15b	DNA/hAT-Charlie	chr1	227979548	227979732	+	26.71	Ancient
XLOC_000600	linc-RHOU-1	TCONS_00001318	lincRNA	chr1	228688983	228697976	+	8994	565	LAST	3	chr1	228697592	228697976	385	231	60	40.885	49.0265	2	SPL	L1MC1	LINE/L1	chr1	228697219	228697822	+	16.34	Ancient
XLOC_000600	linc-RHOU-1	TCONS_00001318	lincRNA	chr1	228688983	228697976	+	8994	565	FIRST	1	chr1	228688983	228689028	46	46	100	8.14159	49.0265	2	TSS_SPL	MER77B	LTR/ERVL	chr1	228688793	228689460	-	23.11	Ancient
XLOC_000600	linc-RHOU-1	TCONS_00001319	lincRNA	chr1	228696525	228697570	+	1046	320	LAST	2	chr1	228697262	228697570	309	309	100	96.5625	96.5625	2	PolyA_SPL	L1MC1	LINE/L1	chr1	228697219	228697822	+	16.34	Ancient
XLOC_000601	linc-URB2-3	TCONS_00001320	lincRNA	chr1	229455027	229455445	+	419	334	LAST	2	chr1	229455396	229455445	50	49	98	14.6707	99.7006	1	SPL	L1MEf	LINE/L1	chr1	229454607	229455444	-	26.28	Ancient
XLOC_000601	linc-URB2-3	TCONS_00001320	lincRNA	chr1	229455027	229455445	+	419	334	FIRST	1	chr1	229455027	229455310	284	284	100	85.0299	99.7006	1	TSS_SPL	L1MEf	LINE/L1	chr1	229454607	229455444	-	26.28	Ancient
XLOC_000605	linc-COG2-2	TCONS_00001323	lincRNA	chr1	230450246	230451789	+	1544	1464	FIRST	1	chr1	230450246	230451677	1432	357	24.9302	24.3852	24.3852	1	exonized	L3	LINE/CR1	chr1	230451008	230451364	-	32.5	Ancient
XLOC_000606	linc-COG2-1	TCONS_00000415	lincRNA	chr1	230728406	230731329	+	2924	403	LAST	2	chr1	230731108	230731329	222	76	34.2342	18.8586	63.7717	1	PolyA	L2c	LINE/L2	chr1	230731254	230731530	+	32.46	Ancient
XLOC_000606	linc-COG2-1	TCONS_00000415	lincRNA	chr1	230728406	230731329	+	2924	403	FIRST	1	chr1	230728406	230728586	181	181	100	44.9132	63.7717	1	TSS_SPL	MLT2B1	LTR/ERVL	chr1	230728361	230728808	-	20.04	Ancient
XLOC_000609	linc-C1orf124-2	TCONS_00001324	lincRNA	chr1	231454150	231456100	+	1951	1318	LAST	2	chr1	231455727	231456100	374	115	30.7487	8.72534	53.4901	1	SPL	FLAM_A	SINE/Alu	chr1	231455710	231455841	-	18.67	LineageSpe
XLOC_000609	linc-C1orf124-2	TCONS_00001324	lincRNA	chr1	231454150	231456100	+	1951	1318	LAST	2	chr1	231455727	231456100	374	234	62.5668	17.7542	53.4901	1	PolyA	L1MEg	LINE/L1	chr1	231455867	231456181	-	27.07	Ancient
XLOC_000609	linc-C1orf124-2	TCONS_00001324	lincRNA	chr1	231454150	231456100	+	1951	1318	FIRST	1	chr1	231454150	231455093	944	225	23.8347	17.0713	53.4901	1	SPL	Tigger3	DNA/TcMar-Tigger	chr1	231454869	231455412	-	13.95	LineageSpe
XLOC_000609	linc-C1orf124-2	TCONS_00001324	lincRNA	chr1	231454150	231456100	+	1951	1318	FIRST	1	chr1	231454150	231455093	944	131	13.8771	9.9393	53.4901	1	TSS	MamGypLTR1c	LTR/Gypsy	chr1	231454070	231454280	+	30.2	Ancient
XLOC_000610	linc-C1orf124-1	TCONS_00000416	lincRNA	chr1	231464488	231467017	+	2530	1972	LAST	2	chr1	231466236	231467017	782	219	28.0051	11.1055	87.8296	1	SPL	AluJb	SINE/Alu	chr1	231466183	231466454	+	16.49	LineageSpe
XLOC_000610	linc-C1orf124-1	TCONS_00000416	lincRNA	chr1	231464488	231467017	+	2530	1972	LAST	2	chr1	231466236	231467017	782	182	23.2737	9.22921	87.8296	1	PolyA	L1ME3G	LINE/L1	chr1	231466836	231467293	+	27.94	Ancient
XLOC_000610	linc-C1orf124-1	TCONS_00000416	lincRNA	chr1	231464488	231467017	+	2530	1972	FIRST	1	chr1	231464488	231465677	1190	155	13.0252	7.86004	87.8296	1	SPL	AluSx1	SINE/Alu	chr1	231465523	231465773	-	11.14	LineageSpe
XLOC_000610	linc-C1orf124-1	TCONS_00000416	lincRNA	chr1	231464488	231467017	+	2530	1972	LAST	2	chr1	231466236	231467017	782	90	11.509	4.56389	87.8296	1	exonized	L1ME3G	LINE/L1	chr1	231466455	231466544	+	27.94	Ancient
XLOC_000610	linc-C1orf124-1	TCONS_00000416	lincRNA	chr1	231464488	231467017	+	2530	1972	FIRST	1	chr1	231464488	231465677	1190	320	26.8908	16.2272	87.8296	1	exonized	MER2	DNA/TcMar-Tigger	chr1	231464990	231465309	+	18.62	Ancient
XLOC_000610	linc-C1orf124-1	TCONS_00000416	lincRNA	chr1	231464488	231467017	+	2530	1972	FIRST	1	chr1	231464488	231465677	1190	100	8.40336	5.07099	87.8296	1	exonized	L1M5	LINE/L1	chr1	231465423	231465522	+	28.23	Ancient
XLOC_000610	linc-C1orf124-1	TCONS_00000416	lincRNA	chr1	231464488	231467017	+	2530	1972	LAST	2	chr1	231466236	231467017	782	291	37.2123	14.7566	87.8296	1	exonized	AluJo	SINE/Alu	chr1	231466545	231466835	-	16.42	LineageSpe
XLOC_000610	linc-C1orf124-1	TCONS_00000416	lincRNA	chr1	231464488	231467017	+	2530	1972	FIRST	1	chr1	231464488	231465677	1190	375	31.5126	19.0162	87.8296	1	TSS	L1M5	LINE/L1	chr1	231464019	231464862	+	28.23	Ancient
XLOC_000614	linc-KIAA1383-4	TCONS_00000417	lincRNA	chr1	232295837	232321389	+	25553	818	LAST	3	chr1	232320845	232321389	545	81	14.8624	9.9022	26.1614	1	SPL	UCON28b	Unknown	chr1	232320655	232320925	-	29.97	Ancient
XLOC_000614	linc-KIAA1383-4	TCONS_00000417	lincRNA	chr1	232295837	232321389	+	25553	818	FIRST	1	chr1	232295837	232295969	133	133	100	16.2592	26.1614	1	TSS_SPL	THE1B	LTR/ERVL-MaLR	chr1	232295707	232296050	+	12.8	LineageSpe
XLOC_000615	linc-KIAA1383-3	TCONS_00000418	lincRNA	chr1	232447238	232448857	+	1620	1082	FIRST	1	chr1	232447238	232447892	655	13	1.98473	1.20148	31.793	1	SPL	L2b	LINE/L2	chr1	232447880	232447951	-	32.38	Ancient
XLOC_000615	linc-KIAA1383-3	TCONS_00000418	lincRNA	chr1	232447238	232448857	+	1620	1082	LAST	2	chr1	232448431	232448857	427	195	45.6674	18.0222	31.793	1	exonized	MLT1H	LTR/ERVL-MaLR	chr1	232448580	232448774	-	26.7	Ancient
XLOC_000615	linc-KIAA1383-3	TCONS_00000418	lincRNA	chr1	232447238	232448857	+	1620	1082	FIRST	1	chr1	232447238	232447892	655	136	20.7634	12.5693	31.793	1	exonized	L2	LINE/L2	chr1	232447626	232447761	+	32.38	Ancient
XLOC_000616	linc-KIAA1383-2	TCONS_00001326	lincRNA	chr1	232449868	232450795	+	928	499	LAST	2	chr1	232450341	232450795	455	455	100	91.1824	100	1	PolyA_SPL	MamGypLTR1c	LTR/Gypsy	chr1	232450217	232450874	+	30.2	Ancient
XLOC_000616	linc-KIAA1383-2	TCONS_00001326	lincRNA	chr1	232449868	232450795	+	928	499	FIRST	1	chr1	232449868	232449911	44	44	100	8.81764	100	1	TSS_SPL	LTR12_	LTR/ERV1	chr1	232449585	232450203	-	9.4	LineageSpe
XLOC_000617	linc-KIAA1383-1	TCONS_00000419	lincRNA	chr1	232853817	232857996	+	4180	372	MIDDLE	2	chr1	232854416	232854634	219	108	49.3151	29.0323	34.9462	2	SPL	L2b	LINE/L2	chr1	232854399	232854523	+	32.38	Ancient
XLOC_000617	linc-KIAA1383-1	TCONS_00000419	lincRNA	chr1	232853817	232857996	+	4180	372	FIRST	1	chr1	232853817	232853838	22	22	100	5.91398	34.9462	2	TSS_SPL	LTR10C	LTR/ERV1	chr1	232853515	232854076	-	7.58	LineageSpe
XLOC_000618	linc-C1orf57-2	TCONS_00001328	lincRNA	chr1	232979123	232994249	+	15127	403	FIRST	1	chr1	232979123	232979323	201	38	18.9055	9.42928	9.42928	3	TSS	L3b	LINE/CR1	chr1	232978930	232979160	+	32.67	Ancient
XLOC_000618	linc-C1orf57-2	TCONS_00001329	lincRNA	chr1	232979123	233033391	+	54269	927	LAST	4	chr1	233033019	233033391	373	306	82.0375	33.0097	37.109	3	PolyA	MER4CL34	LTR/ERV1	chr1	233033086	233033696	+	17.12	LineageSpe
XLOC_000618	linc-C1orf57-2	TCONS_00001329	lincRNA	chr1	232979123	233033391	+	54269	927	FIRST	1	chr1	232979123	232979323	201	38	18.9055	4.09924	37.109	3	TSS	L3b	LINE/CR1	chr1	232978930	232979160	+	32.67	Ancient
XLOC_000618	linc-C1orf57-2	TCONS_00002259	lincRNA	chr1	232979123	233001203	+	22081	561	FIRST	1	chr1	232979123	232979323	201	38	18.9055	6.77362	6.77362	3	TSS	L3b	LINE/CR1	chr1	232978930	232979160	+	32.67	Ancient
XLOC_000619	linc-C1orf57-1	TCONS_00001330	lincRNA	chr1	233067054	233068773	+	1720	441	LAST	2	chr1	233068438	233068773	336	336	100	76.1905	100	1	PolyA_SPL	LTR40a	LTR/ERVL	chr1	233068401	233068912	+	25.25	Ancient
XLOC_000619	linc-C1orf57-1	TCONS_00001330	lincRNA	chr1	233067054	233068773	+	1720	441	FIRST	1	chr1	233067054	233067158	105	105	100	23.8095	100	1	TSS_SPL	ERVL-E-int	LTR/ERVL	chr1	233066908	233067254	+	30.69	Ancient
XLOC_000620	linc-SLC35F3-1	TCONS_00001331	lincRNA	chr1	233860045	233866032	+	5988	730	LAST	2	chr1	233865928	233866032	105	105	100	14.3836	100	2	PolyA_SPL	MER61-int	LTR/ERV1	chr1	233865788	233866168	-	12.49	LineageSpe
XLOC_000620	linc-SLC35F3-1	TCONS_00001331	lincRNA	chr1	233860045	233866032	+	5988	730	FIRST	1	chr1	233860045	233860669	625	37	5.92	5.06849	100	2	SPL	AluSq2	SINE/Alu	chr1	233860633	233860805	-	10.62	LineageSpe
XLOC_000620	linc-SLC35F3-1	TCONS_00001331	lincRNA	chr1	233860045	233866032	+	5988	730	FIRST	1	chr1	233860045	233860669	625	588	94.08	80.5479	100	2	TSS	LTR12D	LTR/ERV1	chr1	233859816	233860632	+	10.66	LineageSpe
XLOC_000620	linc-SLC35F3-1	TCONS_00002260	lincRNA	chr1	233860207	233866505	+	6299	846	LAST	2	chr1	233866123	233866505	383	46	12.0104	5.43735	100.827	2	SPL	MER61-int	LTR/ERV1	chr1	233865788	233866168	-	12.49	LineageSpe
XLOC_000620	linc-SLC35F3-1	TCONS_00002260	lincRNA	chr1	233860207	233866505	+	6299	846	FIRST	1	chr1	233860207	233860669	463	37	7.99136	4.37352	100.827	2	SPL	AluSq2	SINE/Alu	chr1	233860633	233860805	-	10.62	LineageSpe
XLOC_000620	linc-SLC35F3-1	TCONS_00002260	lincRNA	chr1	233860207	233866505	+	6299	846	LAST	2	chr1	233866123	233866505	383	344	89.8172	40.6619	100.827	2	PolyA	MER61-int	LTR/ERV1	chr1	233866162	233866973	-	12.49	LineageSpe
XLOC_000620	linc-SLC35F3-1	TCONS_00002260	lincRNA	chr1	233860207	233866505	+	6299	846	FIRST	1	chr1	233860207	233860669	463	426	92.0086	50.3546	100.827	2	TSS	LTR12D	LTR/ERV1	chr1	233859816	233860632	+	10.66	LineageSpe
XLOC_000622	linc-GGPS1-6	TCONS_00000420	lincRNA	chr1	234701044	234705834	+	4791	390	LAST	2	chr1	234705570	234705834	265	171	64.5283	43.8462	47.6923	1	SPL	MIRc	SINE/MIR	chr1	234705537	234705740	-	29.57	Ancient
XLOC_000622	linc-GGPS1-6	TCONS_00000420	lincRNA	chr1	234701044	234705834	+	4791	390	FIRST	1	chr1	234701044	234701168	125	15	12	3.84615	47.6923	1	SPL	MIRb	SINE/MIR	chr1	234701154	234701245	+	29.76	Ancient
XLOC_000623	linc-GGPS1-5	TCONS_00000010	lincRNA	chr1	234765057	234770524	+	5468	2268	LAST	2	chr1	234768694	234770524	1831	94	5.13381	4.14462	39.5944	1	exonized	L2c	LINE/L2	chr1	234770403	234770496	+	32.46	Ancient
XLOC_000623	linc-GGPS1-5	TCONS_00000010	lincRNA	chr1	234765057	234770524	+	5468	2268	LAST	2	chr1	234768694	234770524	1831	448	24.4675	19.7531	39.5944	1	exonized	MLT1C	LTR/ERVL-MaLR	chr1	234769796	234770243	+	21.68	Ancient
XLOC_000623	linc-GGPS1-5	TCONS_00000010	lincRNA	chr1	234765057	234770524	+	5468	2268	FIRST	1	chr1	234765057	234765493	437	356	81.4645	15.6966	39.5944	1	SPL	MLT1J2	LTR/ERVL-MaLR	chr1	234765138	234765579	+	28.4	Ancient
XLOC_000624	linc-GGPS1-4	TCONS_00000069	lincRNA	chr1	234782035	234796669	+	14635	1372	LAST	4	chr1	234795880	234796669	790	515	65.1899	37.5364	53.3528	4	SPL	MER50B	LTR/ERV1	chr1	234795697	234796394	+	13.89	Ancient
XLOC_000624	linc-GGPS1-4	TCONS_00000069	lincRNA	chr1	234782035	234796669	+	14635	1372	FIRST	1	chr1	234782035	234782251	217	217	100	15.8163	53.3528	4	TSS_SPL	Tigger11a	DNA/TcMar-Tigger	chr1	234781976	234782390	+	28.06	Ancient
XLOC_000624	linc-GGPS1-4	TCONS_00000421	lincRNA	chr1	234791871	234816868	+	24998	421	LAST	2	chr1	234816557	234816868	312	312	100	74.1093	74.1093	4	PolyA_SPL	L2a	LINE/L2	chr1	234816507	234817188	-	29.37	Ancient
XLOC_000624	linc-GGPS1-4	TCONS_00000422	lincRNA	chr1	234796017	234802850	+	6834	933	FIRST	1	chr1	234796017	234796114	98	98	100	10.5038	55.4126	4	TSS_SPL	MER50B	LTR/ERV1	chr1	234795697	234796394	+	13.89	Ancient
XLOC_000624	linc-GGPS1-4	TCONS_00000422	lincRNA	chr1	234796017	234802850	+	6834	933	LAST	3	chr1	234802078	234802850	773	357	46.1837	38.2637	55.4126	4	PolyA	MLT1B	LTR/ERVL-MaLR	chr1	234802494	234802889	+	18.85	Ancient
XLOC_000624	linc-GGPS1-4	TCONS_00000422	lincRNA	chr1	234796017	234802850	+	6834	933	MIDDLE	2	chr1	234800588	234800649	62	62	100	6.64523	55.4126	4	Both_SPL	MER1A	DNA/hAT-Charlie	chr1	234800297	234800818	+	12.59	LineageSpe
XLOC_000624	linc-GGPS1-4	TCONS_00000423	lincRNA	chr1	234809842	234818922	+	9081	631	LAST	3	chr1	234818438	234818922	485	391	80.6186	61.9651	80.1902	4	SPL	L1ME4a	LINE/L1	chr1	234818287	234818828	+	27.76	Ancient
XLOC_000624	linc-GGPS1-4	TCONS_00000423	lincRNA	chr1	234809842	234818922	+	9081	631	MIDDLE	2	chr1	234816557	234816671	115	115	100	18.225	80.1902	4	Both_SPL	L2a	LINE/L2	chr1	234816507	234817188	-	29.37	Ancient
XLOC_000625	linc-GGPS1-3	TCONS_00000070	lincRNA	chr1	234845130	234855967	+	10838	1257	MIDDLE	2	chr1	234848452	234848863	412	132	32.0388	10.5012	10.5012	3	SPL	L2c	LINE/L2	chr1	234848732	234848948	+	32.46	Ancient
XLOC_000625	linc-GGPS1-3	TCONS_00000424	lincRNA	chr1	234845005	234851761	+	6757	2535	FIRST	1	chr1	234845005	234845066	62	62	100	2.44576	22.8402	3	TSS_SPL	L2b	LINE/L2	chr1	234844675	234845071	-	32.38	Ancient
XLOC_000625	linc-GGPS1-3	TCONS_00000424	lincRNA	chr1	234845005	234851761	+	6757	2535	LAST	3	chr1	234849671	234851761	2091	237	11.3343	9.34911	22.8402	3	exonized	L2	LINE/L2	chr1	234851281	234851517	-	32.38	Ancient
XLOC_000625	linc-GGPS1-3	TCONS_00000424	lincRNA	chr1	234845005	234851761	+	6757	2535	MIDDLE	2	chr1	234848452	234848833	382	102	26.7016	4.02367	22.8402	3	SPL	L2c	LINE/L2	chr1	234848732	234848948	+	32.46	Ancient
XLOC_000625	linc-GGPS1-3	TCONS_00000424	lincRNA	chr1	234845005	234851761	+	6757	2535	LAST	3	chr1	234849671	234851761	2091	178	8.51267	7.0217	22.8402	3	exonized	L3b	LINE/CR1	chr1	234850387	234850564	-	32.67	Ancient
XLOC_000625	linc-GGPS1-3	TCONS_00001332	lincRNA	chr1	234852398	234855058	+	2661	724	FIRST	1	chr1	234852398	234853100	703	245	34.8506	33.8398	33.8398	3	TSS	L2b	LINE/L2	chr1	234852390	234852642	-	32.38	Ancient
XLOC_000626	linc-GGPS1-2	TCONS_00000071	lincRNA	chr1	234861148	234867390	+	6243	3574	LAST	2	chr1	234864095	234867390	3296	52	1.57767	1.45495	4.7286	1	exonized	L2c	LINE/L2	chr1	234865157	234865208	+	32.46	Ancient
XLOC_000626	linc-GGPS1-2	TCONS_00000071	lincRNA	chr1	234861148	234867390	+	6243	3574	LAST	2	chr1	234864095	234867390	3296	49	1.48665	1.37101	4.7286	1	exonized	MIRc	SINE/MIR	chr1	234864782	234864830	+	29.57	Ancient
XLOC_000626	linc-GGPS1-2	TCONS_00000071	lincRNA	chr1	234861148	234867390	+	6243	3574	LAST	2	chr1	234864095	234867390	3296	68	2.06311	1.90263	4.7286	1	exonized	MIR3	SINE/MIR	chr1	234864231	234864298	-	29.77	Ancient
XLOC_000628	linc-GPR137B-3	TCONS_00001333	lincRNA	chr1	236120927	236138865	+	17939	431	LAST	2	chr1	236138835	236138865	31	31	100	7.19258	54.0603	1	PolyA_SPL	AluJr	SINE/Alu	chr1	236138634	236138945	-	16.75	LineageSpe
XLOC_000628	linc-GPR137B-3	TCONS_00001333	lincRNA	chr1	236120927	236138865	+	17939	431	FIRST	1	chr1	236120927	236121326	400	100	25	23.2019	54.0603	1	exonized	L1ME3A	LINE/L1	chr1	236120998	236121097	+	25.23	Ancient
XLOC_000628	linc-GPR137B-3	TCONS_00001333	lincRNA	chr1	236120927	236138865	+	17939	431	FIRST	1	chr1	236120927	236121326	400	102	25.5	23.6659	54.0603	1	SPL	MER50	LTR/ERV1	chr1	236121225	236121927	-	15.84	Ancient
XLOC_000630	linc-GPR137B-1	TCONS_00002263	lincRNA	chr1	236260402	236261074	+	673	470	LAST	2	chr1	236260641	236261074	434	65	14.977	13.8298	70.4255	4	exonized	AluSq10	SINE/Alu	chr1	236260910	236260974	-	9.36	LineageSpe
XLOC_000630	linc-GPR137B-1	TCONS_00002263	lincRNA	chr1	236260402	236261074	+	673	470	FIRST	1	chr1	236260402	236260437	36	36	100	7.65957	70.4255	4	TSS_SPL	LTR10A	LTR/ERV1	chr1	236260079	236260448	-	14.28	LineageSpe
XLOC_000630	linc-GPR137B-1	TCONS_00002263	lincRNA	chr1	236260402	236261074	+	673	470	LAST	2	chr1	236260641	236261074	434	230	52.9954	48.9362	70.4255	4	SPL	LTR10A	LTR/ERV1	chr1	236260635	236260870	-	14.28	LineageSpe
XLOC_000630	linc-GPR137B-1	TCONS_00002264	lincRNA	chr1	236260402	236261074	+	673	499	LAST	3	chr1	236260641	236261074	434	65	14.977	13.0261	72.1443	4	exonized	AluSq10	SINE/Alu	chr1	236260910	236260974	-	9.36	LineageSpe
XLOC_000630	linc-GPR137B-1	TCONS_00002264	lincRNA	chr1	236260402	236261074	+	673	499	FIRST	1	chr1	236260402	236260437	36	36	100	7.21443	72.1443	4	TSS_SPL	LTR10A	LTR/ERV1	chr1	236260079	236260448	-	14.28	LineageSpe
XLOC_000630	linc-GPR137B-1	TCONS_00002264	lincRNA	chr1	236260402	236261074	+	673	499	MIDDLE	2	chr1	236260554	236260582	29	29	100	5.81162	72.1443	4	Both_SPL	LTR10A	LTR/ERV1	chr1	236260548	236260622	-	14.28	LineageSpe
XLOC_000630	linc-GPR137B-1	TCONS_00002264	lincRNA	chr1	236260402	236261074	+	673	499	LAST	3	chr1	236260641	236261074	434	230	52.9954	46.0922	72.1443	4	SPL	LTR10A	LTR/ERV1	chr1	236260635	236260870	-	14.28	LineageSpe
XLOC_000630	linc-GPR137B-1	TCONS_00002265	lincRNA	chr1	236260402	236261074	+	673	499	LAST	2	chr1	236260641	236261074	434	65	14.977	13.0261	68.5371	4	exonized	AluSq10	SINE/Alu	chr1	236260910	236260974	-	9.36	LineageSpe
XLOC_000630	linc-GPR137B-1	TCONS_00002265	lincRNA	chr1	236260402	236261074	+	673	499	FIRST	1	chr1	236260402	236260466	65	47	72.3077	9.41884	68.5371	4	TSS	LTR10A	LTR/ERV1	chr1	236260079	236260448	-	14.28	LineageSpe
XLOC_000630	linc-GPR137B-1	TCONS_00002265	lincRNA	chr1	236260402	236261074	+	673	499	LAST	2	chr1	236260641	236261074	434	230	52.9954	46.0922	68.5371	4	SPL	LTR10A	LTR/ERV1	chr1	236260635	236260870	-	14.28	LineageSpe
XLOC_000630	linc-GPR137B-1	TCONS_00002266	lincRNA	chr1	236260402	236261074	+	673	528	LAST	3	chr1	236260641	236261074	434	65	14.977	12.3106	70.2652	4	exonized	AluSq10	SINE/Alu	chr1	236260910	236260974	-	9.36	LineageSpe
XLOC_000630	linc-GPR137B-1	TCONS_00002266	lincRNA	chr1	236260402	236261074	+	673	528	FIRST	1	chr1	236260402	236260466	65	47	72.3077	8.90152	70.2652	4	TSS	LTR10A	LTR/ERV1	chr1	236260079	236260448	-	14.28	LineageSpe
XLOC_000630	linc-GPR137B-1	TCONS_00002266	lincRNA	chr1	236260402	236261074	+	673	528	MIDDLE	2	chr1	236260554	236260582	29	29	100	5.49242	70.2652	4	Both_SPL	LTR10A	LTR/ERV1	chr1	236260548	236260622	-	14.28	LineageSpe
XLOC_000630	linc-GPR137B-1	TCONS_00002266	lincRNA	chr1	236260402	236261074	+	673	528	LAST	3	chr1	236260641	236261074	434	230	52.9954	43.5606	70.2652	4	SPL	LTR10A	LTR/ERV1	chr1	236260635	236260870	-	14.28	LineageSpe
XLOC_000633	linc-RYR2-2	TCONS_00001335	lincRNA	chr1	237070344	237091621	+	21278	7360	LAST	4	chr1	237084732	237091621	6890	102	1.48041	1.38587	56.6848	4	exonized	L1MB1	LINE/L1	chr1	237085082	237085183	+	18.43	Ancient
XLOC_000633	linc-RYR2-2	TCONS_00001335	lincRNA	chr1	237070344	237091621	+	21278	7360	LAST	4	chr1	237084732	237091621	6890	22	0.319303	0.298913	56.6848	4	exonized	L1MB1	LINE/L1	chr1	237084780	237084801	+	18.43	Ancient
XLOC_000633	linc-RYR2-2	TCONS_00001335	lincRNA	chr1	237070344	237091621	+	21278	7360	LAST	4	chr1	237084732	237091621	6890	46	0.667634	0.625	56.6848	4	exonized	L3	LINE/CR1	chr1	237088655	237088700	+	32.5	Ancient
XLOC_000633	linc-RYR2-2	TCONS_00001335	lincRNA	chr1	237070344	237091621	+	21278	7360	MIDDLE	2	chr1	237076598	237076724	127	78	61.4173	1.05978	56.6848	4	SPL	MIR3	SINE/MIR	chr1	237076647	237076778	+	29.77	Ancient
XLOC_000633	linc-RYR2-2	TCONS_00001335	lincRNA	chr1	237070344	237091621	+	21278	7360	LAST	4	chr1	237084732	237091621	6890	280	4.06386	3.80435	56.6848	4	exonized	AluJo	SINE/Alu	chr1	237084802	237085081	+	16.42	LineageSpe
XLOC_000633	linc-RYR2-2	TCONS_00001335	lincRNA	chr1	237070344	237091621	+	21278	7360	LAST	4	chr1	237084732	237091621	6890	262	3.80261	3.55978	56.6848	4	exonized	L1MB1	LINE/L1	chr1	237085557	237085818	+	18.43	Ancient
XLOC_000633	linc-RYR2-2	TCONS_00001335	lincRNA	chr1	237070344	237091621	+	21278	7360	LAST	4	chr1	237084732	237091621	6890	231	3.35269	3.13859	56.6848	4	exonized	L1ME2	LINE/L1	chr1	237085810	237086040	+	24.92	Ancient
XLOC_000633	linc-RYR2-2	TCONS_00001335	lincRNA	chr1	237070344	237091621	+	21278	7360	LAST	4	chr1	237084732	237091621	6890	236	3.42525	3.20652	56.6848	4	exonized	Tigger2	DNA/TcMar-Tigger	chr1	237090728	237090963	-	14.59	LineageSpe
XLOC_000633	linc-RYR2-2	TCONS_00001335	lincRNA	chr1	237070344	237091621	+	21278	7360	LAST	4	chr1	237084732	237091621	6890	142	2.06096	1.92935	56.6848	4	exonized	L1MC4	LINE/L1	chr1	237086554	237086695	+	25.02	Ancient
XLOC_000633	linc-RYR2-2	TCONS_00001335	lincRNA	chr1	237070344	237091621	+	21278	7360	LAST	4	chr1	237084732	237091621	6890	135	1.95936	1.83424	56.6848	4	exonized	FLAM_A	SINE/Alu	chr1	237088353	237088487	-	18.67	LineageSpe
XLOC_000633	linc-RYR2-2	TCONS_00001335	lincRNA	chr1	237070344	237091621	+	21278	7360	MIDDLE	3	chr1	237080041	237080220	180	180	100	2.44565	56.6848	4	Both_SPL	L1MEc	LINE/L1	chr1	237079989	237080260	+	25.01	Ancient
XLOC_000633	linc-RYR2-2	TCONS_00001335	lincRNA	chr1	237070344	237091621	+	21278	7360	LAST	4	chr1	237084732	237091621	6890	209	3.03338	2.83967	56.6848	4	PolyA	L2a	LINE/L2	chr1	237091413	237091697	+	29.37	Ancient
XLOC_000633	linc-RYR2-2	TCONS_00001335	lincRNA	chr1	237070344	237091621	+	21278	7360	LAST	4	chr1	237084732	237091621	6890	222	3.22206	3.0163	56.6848	4	exonized	L1ME2	LINE/L1	chr1	237086342	237086563	+	24.92	Ancient
XLOC_000633	linc-RYR2-2	TCONS_00001335	lincRNA	chr1	237070344	237091621	+	21278	7360	LAST	4	chr1	237084732	237091621	6890	409	5.93614	5.55707	56.6848	4	exonized	MLT2B1	LTR/ERVL	chr1	237091004	237091412	-	20.04	Ancient
XLOC_000633	linc-RYR2-2	TCONS_00001335	lincRNA	chr1	237070344	237091621	+	21278	7360	LAST	4	chr1	237084732	237091621	6890	351	5.09434	4.76902	56.6848	4	exonized	THE1B	LTR/ERVL-MaLR	chr1	237089749	237090099	+	12.8	LineageSpe
XLOC_000633	linc-RYR2-2	TCONS_00001335	lincRNA	chr1	237070344	237091621	+	21278	7360	LAST	4	chr1	237084732	237091621	6890	158	2.29318	2.14674	56.6848	4	exonized	Tigger2	DNA/TcMar-Tigger	chr1	237090272	237090429	-	14.59	LineageSpe
XLOC_000633	linc-RYR2-2	TCONS_00001335	lincRNA	chr1	237070344	237091621	+	21278	7360	LAST	4	chr1	237084732	237091621	6890	162	2.35123	2.20109	56.6848	4	exonized	MamRep434	DNA/TcMar-Tigger	chr1	237087622	237087783	+	27.35	Ancient
XLOC_000633	linc-RYR2-2	TCONS_00001335	lincRNA	chr1	237070344	237091621	+	21278	7360	LAST	4	chr1	237084732	237091621	6890	273	3.96226	3.70924	56.6848	4	exonized	AluSp	SINE/Alu	chr1	237090430	237090702	+	9.53	LineageSpe
XLOC_000633	linc-RYR2-2	TCONS_00001335	lincRNA	chr1	237070344	237091621	+	21278	7360	LAST	4	chr1	237084732	237091621	6890	301	4.36865	4.08967	56.6848	4	exonized	AluJr4	SINE/Alu	chr1	237086041	237086341	+	17.33	LineageSpe
XLOC_000633	linc-RYR2-2	TCONS_00001335	lincRNA	chr1	237070344	237091621	+	21278	7360	LAST	4	chr1	237084732	237091621	6890	373	5.41364	5.06793	56.6848	4	exonized	THE1C	LTR/ERVL-MaLR	chr1	237085184	237085556	+	12.21	LineageSpe
XLOC_000633	linc-RYR2-2	TCONS_00001336	lincRNA	chr1	237076593	237080307	+	3715	399	FIRST	1	chr1	237076593	237076724	132	78	59.0909	19.5489	86.4662	4	SPL	MIR3	SINE/MIR	chr1	237076647	237076778	+	29.77	Ancient
XLOC_000633	linc-RYR2-2	TCONS_00001336	lincRNA	chr1	237076593	237080307	+	3715	399	LAST	2	chr1	237080041	237080307	267	220	82.397	55.1378	86.4662	4	SPL	L1MEc	LINE/L1	chr1	237079989	237080260	+	25.01	Ancient
XLOC_000633	linc-RYR2-2	TCONS_00001336	lincRNA	chr1	237076593	237080307	+	3715	399	LAST	2	chr1	237080041	237080307	267	47	17.603	11.7794	86.4662	4	PolyA	MER106A	DNA/hAT-Charlie	chr1	237080261	237080516	-	21.92	Ancient
XLOC_000633	linc-RYR2-2	TCONS_00001337	lincRNA	chr1	237076595	237085551	+	8957	1130	LAST	3	chr1	237084732	237085551	820	102	12.439	9.02655	91.1504	4	exonized	L1MB1	LINE/L1	chr1	237085082	237085183	+	18.43	Ancient
XLOC_000633	linc-RYR2-2	TCONS_00001337	lincRNA	chr1	237076595	237085551	+	8957	1130	FIRST	1	chr1	237076595	237076724	130	78	60	6.90265	91.1504	4	SPL	MIR3	SINE/MIR	chr1	237076647	237076778	+	29.77	Ancient
XLOC_000633	linc-RYR2-2	TCONS_00001337	lincRNA	chr1	237076595	237085551	+	8957	1130	LAST	3	chr1	237084732	237085551	820	280	34.1463	24.7788	91.1504	4	exonized	AluJo	SINE/Alu	chr1	237084802	237085081	+	16.42	LineageSpe
XLOC_000633	linc-RYR2-2	TCONS_00001337	lincRNA	chr1	237076595	237085551	+	8957	1130	LAST	3	chr1	237084732	237085551	820	22	2.68293	1.9469	91.1504	4	exonized	L1MB1	LINE/L1	chr1	237084780	237084801	+	18.43	Ancient
XLOC_000633	linc-RYR2-2	TCONS_00001337	lincRNA	chr1	237076595	237085551	+	8957	1130	LAST	3	chr1	237084732	237085551	820	368	44.878	32.5664	91.1504	4	PolyA	THE1C	LTR/ERVL-MaLR	chr1	237085184	237085556	+	12.21	LineageSpe
XLOC_000633	linc-RYR2-2	TCONS_00001337	lincRNA	chr1	237076595	237085551	+	8957	1130	MIDDLE	2	chr1	237080041	237080220	180	180	100	15.9292	91.1504	4	Both_SPL	L1MEc	LINE/L1	chr1	237079989	237080260	+	25.01	Ancient
XLOC_000633	linc-RYR2-2	TCONS_00002269	lincRNA	chr1	237070344	237080231	+	9888	481	LAST	3	chr1	237080041	237080231	191	191	100	39.7089	55.9252	4	PolyA_SPL	L1MEc	LINE/L1	chr1	237079989	237080260	+	25.01	Ancient
XLOC_000633	linc-RYR2-2	TCONS_00002269	lincRNA	chr1	237070344	237080231	+	9888	481	MIDDLE	2	chr1	237076598	237076724	127	78	61.4173	16.2162	55.9252	4	SPL	MIR3	SINE/MIR	chr1	237076647	237076778	+	29.77	Ancient
XLOC_000635	linc-CHRM3-1	TCONS_00001340	lincRNA	chr1	238588741	238608261	+	19521	297	LAST	2	chr1	238608036	238608261	226	226	100	76.0943	76.0943	1	PolyA_SPL	LTR1D1	LTR/ERV1	chr1	238607842	238608714	+	16.93	LineageSpe
XLOC_000639	linc-ZNF238-1	TCONS_00000011	lincRNA	chr1	244080704	244210617	+	129914	1797	MIDDLE	9	chr1	244204729	244204857	129	127	98.4496	7.06733	14.6912	2	SPL	L2a	LINE/L2	chr1	244204731	244204864	-	29.37	Ancient
XLOC_000639	linc-ZNF238-1	TCONS_00000011	lincRNA	chr1	244080704	244210617	+	129914	1797	MIDDLE	4	chr1	244168360	244168460	101	101	100	5.62048	14.6912	2	Both_SPL	ERV3-16A3_I-int	LTR/ERVL	chr1	244168283	244169171	+	28.49	Ancient
XLOC_000639	linc-ZNF238-1	TCONS_00000011	lincRNA	chr1	244080704	244210617	+	129914	1797	MIDDLE	5	chr1	244173323	244173394	72	36	50	2.00334	14.6912	2	SPL	ERV3-16A3_I-int	LTR/ERVL	chr1	244172864	244173358	+	28.49	Ancient
XLOC_000641	linc-KIF26B-1	TCONS_00001349	lincRNA	chr1	245293033	245295590	+	2558	871	LAST	2	chr1	245294835	245295590	756	364	48.1481	41.791	41.791	1	exonized	L2b	LINE/L2	chr1	245295193	245295556	-	32.38	Ancient
XLOC_000642	linc-SCCPDH-1	TCONS_00000429	lincRNA	chr1	246853349	246855123	+	1775	522	FIRST	1	chr1	246853349	246853516	168	115	68.4524	22.0307	22.0307	2	TSS	LTR41	LTR/ERVL	chr1	246853190	246853463	+	23.54	Ancient
XLOC_000642	linc-SCCPDH-1	TCONS_00001350	lincRNA	chr1	246846453	246855175	+	8723	924	MIDDLE	2	chr1	246853034	246853516	483	98	20.2899	10.6061	40.2597	2	SPL	LTR41	LTR/ERVL	chr1	246852874	246853131	+	23.54	Ancient
XLOC_000642	linc-SCCPDH-1	TCONS_00001350	lincRNA	chr1	246846453	246855175	+	8723	924	MIDDLE	2	chr1	246853034	246853516	483	274	56.7288	29.6537	40.2597	2	exonized	LTR41	LTR/ERVL	chr1	246853190	246853463	+	23.54	Ancient
XLOC_000643	linc-VN1R5-3	TCONS_00000012	lincRNA	chr1	246952919	246954788	+	1870	1123	LAST	2	chr1	246953748	246954788	1041	54	5.18732	4.80855	4.80855	11	exonized	MIR3	SINE/MIR	chr1	246953755	246953808	-	29.77	Ancient
XLOC_000643	linc-VN1R5-3	TCONS_00000072	lincRNA	chr1	246939315	246955685	+	16371	2598	LAST	6	chr1	246955359	246955685	327	109	33.3333	4.19554	6.27406	11	SPL	L3b	LINE/CR1	chr1	246955304	246955467	+	32.67	Ancient
XLOC_000643	linc-VN1R5-3	TCONS_00000072	lincRNA	chr1	246939315	246955685	+	16371	2598	MIDDLE	5	chr1	246953748	246954497	750	54	7.2	2.07852	6.27406	11	exonized	MIR3	SINE/MIR	chr1	246953755	246953808	-	29.77	Ancient
XLOC_000643	linc-VN1R5-3	TCONS_00000432	lincRNA	chr1	246953926	246955687	+	1762	552	LAST	2	chr1	246955359	246955687	329	109	33.1307	19.7464	19.7464	11	SPL	L3b	LINE/CR1	chr1	246955304	246955467	+	32.67	Ancient
XLOC_000643	linc-VN1R5-3	TCONS_00001351	lincRNA	chr1	246938405	246944084	+	5680	1689	FIRST	1	chr1	246938405	246939570	1166	106	9.09091	6.2759	38.4251	11	TSS	L1ME3B	LINE/L1	chr1	246937699	246938510	-	26.4	Ancient
XLOC_000643	linc-VN1R5-3	TCONS_00001351	lincRNA	chr1	246938405	246944084	+	5680	1689	FIRST	1	chr1	246938405	246939570	1166	344	29.5026	20.3671	38.4251	11	exonized	L1ME3B	LINE/L1	chr1	246938731	246939074	-	26.4	Ancient
XLOC_000643	linc-VN1R5-3	TCONS_00001351	lincRNA	chr1	246938405	246944084	+	5680	1689	FIRST	1	chr1	246938405	246939570	1166	199	17.0669	11.7821	38.4251	11	exonized	MIR	SINE/MIR	chr1	246938529	246938727	+	27.84	Ancient
XLOC_000643	linc-VN1R5-3	TCONS_00001352	lincRNA	chr1	246939995	246956015	+	16021	1859	LAST	5	chr1	246955359	246956015	657	109	16.5906	5.86337	8.76815	11	SPL	L3b	LINE/CR1	chr1	246955304	246955467	+	32.67	Ancient
XLOC_000643	linc-VN1R5-3	TCONS_00001352	lincRNA	chr1	246939995	246956015	+	16021	1859	MIDDLE	4	chr1	246953748	246954148	401	54	13.4663	2.90479	8.76815	11	exonized	MIR3	SINE/MIR	chr1	246953755	246953808	-	29.77	Ancient
XLOC_000643	linc-VN1R5-3	TCONS_00001354	lincRNA	chr1	246947036	246955689	+	8654	1233	LAST	4	chr1	246955359	246955689	331	109	32.9305	8.84023	34.2255	11	SPL	L3b	LINE/CR1	chr1	246955304	246955467	+	32.67	Ancient
XLOC_000643	linc-VN1R5-3	TCONS_00001354	lincRNA	chr1	246947036	246955689	+	8654	1233	MIDDLE	3	chr1	246953748	246954148	401	54	13.4663	4.37956	34.2255	11	exonized	MIR3	SINE/MIR	chr1	246953755	246953808	-	29.77	Ancient
XLOC_000643	linc-VN1R5-3	TCONS_00001354	lincRNA	chr1	246947036	246955689	+	8654	1233	FIRST	1	chr1	246947036	246947345	310	259	83.5484	21.0057	34.2255	11	TSS	AluJb	SINE/Alu	chr1	246947003	246947294	-	16.49	LineageSpe
XLOC_000643	linc-VN1R5-3	TCONS_00001355	lincRNA	chr1	246952827	246955790	+	2964	711	LAST	3	chr1	246955359	246955790	432	109	25.2315	15.3305	15.3305	11	SPL	L3b	LINE/CR1	chr1	246955304	246955467	+	32.67	Ancient
XLOC_000643	linc-VN1R5-3	TCONS_00002270	lincRNA	chr1	246939365	246955666	+	16302	1430	LAST	6	chr1	246955359	246955666	308	109	35.3896	7.62238	11.3986	11	SPL	L3b	LINE/CR1	chr1	246955304	246955467	+	32.67	Ancient
XLOC_000643	linc-VN1R5-3	TCONS_00002270	lincRNA	chr1	246939365	246955666	+	16302	1430	MIDDLE	5	chr1	246953748	246954148	401	54	13.4663	3.77622	11.3986	11	exonized	MIR3	SINE/MIR	chr1	246953755	246953808	-	29.77	Ancient
XLOC_000647	linc-NLRP3-2	TCONS_00002272	lincRNA	chr1	247496212	247556671	+	60460	1073	FIRST	1	chr1	247496212	247497256	1045	80	7.6555	7.45573	22.3672	2	SPL	L2a	LINE/L2	chr1	247497177	247497449	-	29.37	Ancient
XLOC_000647	linc-NLRP3-2	TCONS_00002272	lincRNA	chr1	247496212	247556671	+	60460	1073	FIRST	1	chr1	247496212	247497256	1045	160	15.311	14.9115	22.3672	2	exonized	MIRb	SINE/MIR	chr1	247497016	247497175	+	29.76	Ancient
XLOC_000648	linc-NLRP3-3	TCONS_00001360	lincRNA	chr1	247517241	247522638	+	5398	1904	FIRST	1	chr1	247517241	247517589	349	266	76.2178	13.9706	100	1	SPL	LTR71A	LTR/ERV1	chr1	247517324	247517607	+	10.48	LineageSpe
XLOC_000648	linc-NLRP3-3	TCONS_00001360	lincRNA	chr1	247517241	247522638	+	5398	1904	LAST	2	chr1	247521084	247522638	1555	1555	100	81.6702	100	1	PolyA_SPL	HERVP71A-int	LTR/ERV1	chr1	247520740	247523416	+	12.95	LineageSpe
XLOC_000648	linc-NLRP3-3	TCONS_00001360	lincRNA	chr1	247517241	247522638	+	5398	1904	FIRST	1	chr1	247517241	247517589	349	83	23.7822	4.35924	100	1	TSS	AluSx1	SINE/Alu	chr1	247517013	247517323	+	11.14	LineageSpe
XLOC_000649	linc-NLRP3-1	TCONS_00001361	lincRNA	chr1	247537325	247538837	+	1513	1000	LAST	2	chr1	247537959	247538837	879	685	77.9295	68.5	80.1	1	PolyA	LTR8	LTR/ERV1	chr1	247538153	247538842	+	14.92	LineageSpe
XLOC_000649	linc-NLRP3-1	TCONS_00001361	lincRNA	chr1	247537325	247538837	+	1513	1000	LAST	2	chr1	247537959	247538837	879	116	13.1968	11.6	80.1	1	exonized	LTR8A	LTR/ERV1	chr1	247538037	247538152	+	16.51	LineageSpe
XLOC_000651	linc-OR2G6-1	TCONS_00001364	lincRNA	chr1	248675756	248676345	+	590	426	LAST	2	chr1	248676186	248676345	160	67	41.875	15.7277	100	1	SPL	MER67A	LTR/ERV1	chr1	248676080	248676252	-	20.13	Ancient
XLOC_000651	linc-OR2G6-1	TCONS_00001364	lincRNA	chr1	248675756	248676345	+	590	426	LAST	2	chr1	248676186	248676345	160	93	58.125	21.831	100	1	PolyA	MER67A	LTR/ERV1	chr1	248676253	248676362	+	20.13	Ancient
XLOC_000651	linc-OR2G6-1	TCONS_00001364	lincRNA	chr1	248675756	248676345	+	590	426	FIRST	1	chr1	248675756	248676021	266	266	100	62.4413	100	1	TSS_SPL	MLT1A0	LTR/ERVL-MaLR	chr1	248675742	248676070	+	19.59	Ancient
XLOC_000653	linc-PGBD2-1	TCONS_00000435	lincRNA	chr1	249153363	249158995	+	5633	462	LAST	3	chr1	249158776	249158995	220	154	70	33.3333	33.3333	1	PolyA	L2a	LINE/L2	chr1	249158842	249159220	+	29.37	Ancient
XLOC_000658	linc-ZNF692-6	TCONS_00000437	lincRNA	chr1	139790	140339	-	550	323	FIRST	2	chr1	140075	140339	265	53	20	16.4087	34.3653	1	SPL	MER1A	DNA/hAT-Charlie	chr1	139708	140127	-	12.59	LineageSpe
XLOC_000658	linc-ZNF692-6	TCONS_00000437	lincRNA	chr1	139790	140339	-	550	323	LAST	1	chr1	139790	139847	58	58	100	17.9567	34.3653	1	PolyA_SPL	MER1A	DNA/hAT-Charlie	chr1	139708	140127	-	12.59	LineageSpe
XLOC_000659	linc-ZNF692-5	TCONS_00000438	lincRNA	chr1	141474	149707	-	8234	4860	FIRST	2	chr1	146386	149707	3322	102	3.07044	2.09877	78.3745	2	exonized	AluJb	SINE/Alu	chr1	147060	147161	-	16.49	LineageSpe
XLOC_000659	linc-ZNF692-5	TCONS_00000438	lincRNA	chr1	141474	149707	-	8234	4860	FIRST	2	chr1	146386	149707	3322	88	2.64901	1.8107	78.3745	2	exonized	L1MB8	LINE/L1	chr1	147918	148005	+	19.45	Ancient
XLOC_000659	linc-ZNF692-5	TCONS_00000438	lincRNA	chr1	141474	149707	-	8234	4860	FIRST	2	chr1	146386	149707	3322	31	0.933173	0.63786	78.3745	2	exonized	L1MB8	LINE/L1	chr1	147595	147625	+	19.45	Ancient
XLOC_000659	linc-ZNF692-5	TCONS_00000438	lincRNA	chr1	141474	149707	-	8234	4860	FIRST	2	chr1	146386	149707	3322	60	1.80614	1.23457	78.3745	2	exonized	AluJb	SINE/Alu	chr1	147476	147535	-	16.49	LineageSpe
XLOC_000659	linc-ZNF692-5	TCONS_00000438	lincRNA	chr1	141474	149707	-	8234	4860	LAST	1	chr1	141474	143011	1538	70	4.55137	1.44033	78.3745	2	exonized	MER21C	LTR/ERVL	chr1	141598	141667	+	22.29	Ancient
XLOC_000659	linc-ZNF692-5	TCONS_00000438	lincRNA	chr1	141474	149707	-	8234	4860	LAST	1	chr1	141474	143011	1538	124	8.06242	2.55144	78.3745	2	PolyA	AluJb	SINE/Alu	chr1	141291	141597	-	16.49	LineageSpe
XLOC_000659	linc-ZNF692-5	TCONS_00000438	lincRNA	chr1	141474	149707	-	8234	4860	FIRST	2	chr1	146386	149707	3322	292	8.78989	6.00823	78.3745	2	exonized	AluJb	SINE/Alu	chr1	147626	147917	+	16.49	LineageSpe
XLOC_000659	linc-ZNF692-5	TCONS_00000438	lincRNA	chr1	141474	149707	-	8234	4860	LAST	1	chr1	141474	143011	1538	301	19.5709	6.19342	78.3745	2	exonized	MER21C	LTR/ERVL	chr1	141971	142271	+	22.29	Ancient
XLOC_000659	linc-ZNF692-5	TCONS_00000438	lincRNA	chr1	141474	149707	-	8234	4860	FIRST	2	chr1	146386	149707	3322	111	3.34136	2.28395	78.3745	2	exonized	FLAM_A	SINE/Alu	chr1	148040	148150	-	18.67	LineageSpe
XLOC_000659	linc-ZNF692-5	TCONS_00000438	lincRNA	chr1	141474	149707	-	8234	4860	LAST	1	chr1	141474	143011	1538	104	6.76203	2.13992	78.3745	2	exonized	L2b	LINE/L2	chr1	142766	142869	+	32.38	Ancient
XLOC_000659	linc-ZNF692-5	TCONS_00000438	lincRNA	chr1	141474	149707	-	8234	4860	FIRST	2	chr1	146386	149707	3322	272	8.18784	5.59671	78.3745	2	exonized	AluJr	SINE/Alu	chr1	146776	147047	+	16.75	LineageSpe
XLOC_000659	linc-ZNF692-5	TCONS_00000438	lincRNA	chr1	141474	149707	-	8234	4860	LAST	1	chr1	141474	143011	1538	303	19.7009	6.23457	78.3745	2	exonized	AluJr	SINE/Alu	chr1	141668	141970	+	16.75	LineageSpe
XLOC_000659	linc-ZNF692-5	TCONS_00000438	lincRNA	chr1	141474	149707	-	8234	4860	FIRST	2	chr1	146386	149707	3322	137	4.12402	2.81893	78.3745	2	SPL	AluJr	SINE/Alu	chr1	146229	146522	+	16.75	LineageSpe
XLOC_000659	linc-ZNF692-5	TCONS_00000438	lincRNA	chr1	141474	149707	-	8234	4860	LAST	1	chr1	141474	143011	1538	199	12.9389	4.09465	78.3745	2	exonized	MIRb	SINE/MIR	chr1	142308	142506	+	29.76	Ancient
XLOC_000659	linc-ZNF692-5	TCONS_00000438	lincRNA	chr1	141474	149707	-	8234	4860	FIRST	2	chr1	146386	149707	3322	302	9.09091	6.21399	78.3745	2	exonized	AluJr	SINE/Alu	chr1	148792	149093	+	16.75	LineageSpe
XLOC_000659	linc-ZNF692-5	TCONS_00000438	lincRNA	chr1	141474	149707	-	8234	4860	FIRST	2	chr1	146386	149707	3322	270	8.12763	5.55556	78.3745	2	exonized	AluSx	SINE/Alu	chr1	147162	147431	+	11.66	LineageSpe
XLOC_000659	linc-ZNF692-5	TCONS_00000438	lincRNA	chr1	141474	149707	-	8234	4860	FIRST	2	chr1	146386	149707	3322	308	9.27152	6.33745	78.3745	2	exonized	AluSq2	SINE/Alu	chr1	149396	149703	+	10.62	LineageSpe
XLOC_000659	linc-ZNF692-5	TCONS_00000438	lincRNA	chr1	141474	149707	-	8234	4860	FIRST	2	chr1	146386	149707	3322	620	18.6635	12.7572	78.3745	2	exonized	L1MB8	LINE/L1	chr1	148151	148770	+	19.45	Ancient
XLOC_000659	linc-ZNF692-5	TCONS_00000438	lincRNA	chr1	141474	149707	-	8234	4860	FIRST	2	chr1	146386	149707	3322	115	3.46177	2.36626	78.3745	2	exonized	Tigger12	DNA/TcMar-Tigger	chr1	149097	149211	-	29.76	Ancient
XLOC_000659	linc-ZNF692-5	TCONS_00000439	lincRNA	chr1	142808	146831	-	4024	518	FIRST	3	chr1	146642	146831	190	56	29.4737	10.8108	46.7181	2	TSS	AluJr	SINE/Alu	chr1	146776	147047	+	16.75	LineageSpe
XLOC_000659	linc-ZNF692-5	TCONS_00000439	lincRNA	chr1	142808	146831	-	4024	518	MIDDLE	2	chr1	146386	146509	124	124	100	23.9382	46.7181	2	Both_SPL	AluJr	SINE/Alu	chr1	146229	146522	+	16.75	LineageSpe
XLOC_000659	linc-ZNF692-5	TCONS_00000439	lincRNA	chr1	142808	146831	-	4024	518	LAST	1	chr1	142808	143011	204	62	30.3922	11.9691	46.7181	2	PolyA	L2b	LINE/L2	chr1	142766	142869	+	32.38	Ancient
XLOC_000663	linc-ZNF692-2	TCONS_00000442	lincRNA	chr1	521369	523833	-	2465	842	MIDDLE	2	chr1	522201	522335	135	120	88.8889	14.2518	16.7458	1	SPL	MER4D1	LTR/ERV1	chr1	522216	523011	-	12.71	LineageSpe
XLOC_000663	linc-ZNF692-2	TCONS_00000442	lincRNA	chr1	521369	523833	-	2465	842	LAST	1	chr1	521369	521738	370	21	5.67568	2.49406	16.7458	1	SPL	MER4D1	LTR/ERV1	chr1	521718	521787	-	12.71	LineageSpe
XLOC_000664	linc-OR4F16-8	TCONS_00002275	lincRNA	chr1	684693	689194	-	4502	221	FIRST	2	chr1	689043	689194	152	76	50	34.3891	100	1	TSS	AluJo	SINE/Alu	chr1	689119	689425	+	16.42	LineageSpe
XLOC_000664	linc-OR4F16-8	TCONS_00002275	lincRNA	chr1	684693	689194	-	4502	221	LAST	1	chr1	684693	684761	69	69	100	31.2217	100	1	PolyA_SPL	AluJr	SINE/Alu	chr1	684481	684782	+	16.75	LineageSpe
XLOC_000664	linc-OR4F16-8	TCONS_00002275	lincRNA	chr1	684693	689194	-	4502	221	FIRST	2	chr1	689043	689194	152	76	50	34.3891	100	1	SPL	MER21C	LTR/ERVL	chr1	688809	689118	+	22.29	Ancient
XLOC_000669	linc-OR4F16-3	TCONS_00001368	lincRNA	chr1	843465	845308	-	1844	351	LAST	1	chr1	843465	843762	298	81	27.1812	23.0769	23.0769	1	PolyA	L2a	LINE/L2	chr1	843436	843545	+	29.37	Ancient
XLOC_000671	linc-HES4-1	TCONS_00000447	lincRNA	chr1	947377	948573	-	1197	471	FIRST	2	chr1	948297	948573	277	141	50.9025	29.9363	71.1253	1	SPL	AluJb	SINE/Alu	chr1	948127	948437	+	16.49	LineageSpe
XLOC_000671	linc-HES4-1	TCONS_00000447	lincRNA	chr1	947377	948573	-	1197	471	LAST	1	chr1	947377	947570	194	68	35.0515	14.4374	71.1253	1	PolyA	L1MB5	LINE/L1	chr1	946795	947444	-	19.6	Ancient
XLOC_000671	linc-HES4-1	TCONS_00000447	lincRNA	chr1	947377	948573	-	1197	471	LAST	1	chr1	947377	947570	194	126	64.9485	26.7516	71.1253	1	SPL	AluSx	SINE/Alu	chr1	947445	947755	-	11.66	LineageSpe
XLOC_000675	linc-KIAA1751-1	TCONS_00000074	lincRNA	chr1	1944652	1946969	-	2318	1954	LAST	1	chr1	1944652	1946439	1788	267	14.9329	13.6643	63.7155	2	exonized	AluJb	SINE/Alu	chr1	1945538	1945804	-	16.49	LineageSpe
XLOC_000675	linc-KIAA1751-1	TCONS_00000074	lincRNA	chr1	1944652	1946969	-	2318	1954	LAST	1	chr1	1944652	1946439	1788	117	6.54362	5.98772	63.7155	2	exonized	MLT1F2	LTR/ERVL-MaLR	chr1	1945805	1945921	-	24.38	Ancient
XLOC_000675	linc-KIAA1751-1	TCONS_00000074	lincRNA	chr1	1944652	1946969	-	2318	1954	LAST	1	chr1	1944652	1946439	1788	210	11.745	10.7472	63.7155	2	PolyA	L1ME1	LINE/L1	chr1	1944544	1944861	+	24.03	Ancient
XLOC_000675	linc-KIAA1751-1	TCONS_00000074	lincRNA	chr1	1944652	1946969	-	2318	1954	LAST	1	chr1	1944652	1946439	1788	353	19.7427	18.0655	63.7155	2	exonized	MLT1F2	LTR/ERVL-MaLR	chr1	1944887	1945239	-	24.38	Ancient
XLOC_000675	linc-KIAA1751-1	TCONS_00000074	lincRNA	chr1	1944652	1946969	-	2318	1954	LAST	1	chr1	1944652	1946439	1788	298	16.6667	15.2508	63.7155	2	exonized	AluSz	SINE/Alu	chr1	1945240	1945537	-	12.11	LineageSpe
XLOC_000675	linc-KIAA1751-1	TCONS_00001373	lincRNA	chr1	1945741	1946876	-	1136	956	LAST	1	chr1	1945741	1946439	699	64	9.15594	6.69456	18.9331	2	PolyA	AluJb	SINE/Alu	chr1	1945538	1945804	-	16.49	LineageSpe
XLOC_000675	linc-KIAA1751-1	TCONS_00001373	lincRNA	chr1	1945741	1946876	-	1136	956	LAST	1	chr1	1945741	1946439	699	117	16.7382	12.2385	18.9331	2	exonized	MLT1F2	LTR/ERVL-MaLR	chr1	1945805	1945921	-	24.38	Ancient
XLOC_000676	linc-KIAA1751-2	TCONS_00001374	lincRNA	chr1	1980669	1981566	-	898	769	FIRST	2	chr1	1981037	1981566	530	58	10.9434	7.54226	7.54226	2	TSS	MER5A	DNA/hAT-Charlie	chr1	1981509	1981570	-	25.27	Ancient
XLOC_000677	linc-C1orf86-1	TCONS_00000454	lincRNA	chr1	2143610	2144013	-	404	314	LAST	1	chr1	2143610	2143897	288	31	10.7639	9.87261	9.87261	2	PolyA	AluY	SINE/Alu	chr1	2143340	2143640	-	6.92	LineageSpe
XLOC_000677	linc-C1orf86-1	TCONS_00000455	lincRNA	chr1	2143962	2152175	-	8214	324	FIRST	2	chr1	2151974	2152175	202	19	9.40594	5.8642	5.8642	2	TSS	L1MC4	LINE/L1	chr1	2152157	2152770	-	25.02	Ancient
XLOC_000678	linc-HES5-2	TCONS_00000015	lincRNA	chr1	2481359	2484284	-	2926	2209	FIRST	2	chr1	2482431	2484284	1854	41	2.21143	1.85604	31.5075	4	TSS	MIR	SINE/MIR	chr1	2484244	2484301	+	27.84	Ancient
XLOC_000678	linc-HES5-2	TCONS_00000015	lincRNA	chr1	2481359	2484284	-	2926	2209	LAST	1	chr1	2481359	2481713	355	142	40	6.42825	31.5075	4	PolyA	AluSx1	SINE/Alu	chr1	2481274	2481500	-	11.14	LineageSpe
XLOC_000678	linc-HES5-2	TCONS_00000015	lincRNA	chr1	2481359	2484284	-	2926	2209	FIRST	2	chr1	2482431	2484284	1854	373	20.1187	16.8855	31.5075	4	SPL	L1ME2	LINE/L1	chr1	2482339	2482803	-	24.92	Ancient
XLOC_000678	linc-HES5-2	TCONS_00000015	lincRNA	chr1	2481359	2484284	-	2926	2209	FIRST	2	chr1	2482431	2484284	1854	140	7.55124	6.33771	31.5075	4	exonized	L1MEc	LINE/L1	chr1	2483343	2483482	-	25.01	Ancient
XLOC_000678	linc-HES5-2	TCONS_00000075	lincRNA	chr1	2481359	2484284	-	2926	2368	MIDDLE	2	chr1	2482012	2482170	159	15	9.43396	0.633446	30.0253	4	SPL	MLT1B	LTR/ERVL-MaLR	chr1	2482156	2482336	+	18.85	Ancient
XLOC_000678	linc-HES5-2	TCONS_00000075	lincRNA	chr1	2481359	2484284	-	2926	2368	LAST	1	chr1	2481359	2481713	355	142	40	5.99662	30.0253	4	PolyA	AluSx1	SINE/Alu	chr1	2481274	2481500	-	11.14	LineageSpe
XLOC_000678	linc-HES5-2	TCONS_00000075	lincRNA	chr1	2481359	2484284	-	2926	2368	FIRST	3	chr1	2482431	2484284	1854	41	2.21143	1.73142	30.0253	4	TSS	MIR	SINE/MIR	chr1	2484244	2484301	+	27.84	Ancient
XLOC_000678	linc-HES5-2	TCONS_00000075	lincRNA	chr1	2481359	2484284	-	2926	2368	FIRST	3	chr1	2482431	2484284	1854	373	20.1187	15.7517	30.0253	4	SPL	L1ME2	LINE/L1	chr1	2482339	2482803	-	24.92	Ancient
XLOC_000678	linc-HES5-2	TCONS_00000075	lincRNA	chr1	2481359	2484284	-	2926	2368	FIRST	3	chr1	2482431	2484284	1854	140	7.55124	5.91216	30.0253	4	exonized	L1MEc	LINE/L1	chr1	2483343	2483482	-	25.01	Ancient
XLOC_000678	linc-HES5-2	TCONS_00000076	lincRNA	chr1	2481722	2484284	-	2563	2303	LAST	1	chr1	2481722	2482170	449	15	3.34076	0.651324	29.2662	4	SPL	MLT1B	LTR/ERVL-MaLR	chr1	2482156	2482336	+	18.85	Ancient
XLOC_000678	linc-HES5-2	TCONS_00000076	lincRNA	chr1	2481722	2484284	-	2563	2303	LAST	1	chr1	2481722	2482170	449	105	23.3853	4.55927	29.2662	4	PolyA	L1ME2	LINE/L1	chr1	2481707	2481826	-	24.92	Ancient
XLOC_000678	linc-HES5-2	TCONS_00000076	lincRNA	chr1	2481722	2484284	-	2563	2303	FIRST	2	chr1	2482431	2484284	1854	41	2.21143	1.78029	29.2662	4	TSS	MIR	SINE/MIR	chr1	2484244	2484301	+	27.84	Ancient
XLOC_000678	linc-HES5-2	TCONS_00000076	lincRNA	chr1	2481722	2484284	-	2563	2303	FIRST	2	chr1	2482431	2484284	1854	373	20.1187	16.1963	29.2662	4	SPL	L1ME2	LINE/L1	chr1	2482339	2482803	-	24.92	Ancient
XLOC_000678	linc-HES5-2	TCONS_00000076	lincRNA	chr1	2481722	2484284	-	2563	2303	FIRST	2	chr1	2482431	2484284	1854	140	7.55124	6.07903	29.2662	4	exonized	L1MEc	LINE/L1	chr1	2483343	2483482	-	25.01	Ancient
XLOC_000678	linc-HES5-2	TCONS_00000456	lincRNA	chr1	2481359	2485684	-	4326	500	LAST	1	chr1	2481359	2481713	355	142	40	28.4	28.4	4	PolyA	AluSx1	SINE/Alu	chr1	2481274	2481500	-	11.14	LineageSpe
XLOC_000679	linc-HES5-1	TCONS_00001378	lincRNA	chr1	2499407	2500424	-	1018	893	LAST	1	chr1	2499407	2500283	877	27	3.07868	3.02352	3.02352	1	SPL	MIR	SINE/MIR	chr1	2500257	2500314	-	27.84	Ancient
XLOC_000680	linc-MMEL1-1	TCONS_00000457	lincRNA	chr1	2728415	2729257	-	843	607	FIRST	2	chr1	2728800	2729257	458	214	46.7249	35.2554	35.2554	1	TSS	MLT1D	LTR/ERVL-MaLR	chr1	2729044	2729479	+	21.73	Ancient
XLOC_000681	linc-MMEL1-2	TCONS_00000458	lincRNA	chr1	2730997	2731563	-	567	429	LAST	1	chr1	2730997	2731253	257	52	20.2335	12.1212	65.2681	1	SPL	MLT1H-int	LTR/ERVL-MaLR	chr1	2731202	2731670	-	28.27	Ancient
XLOC_000681	linc-MMEL1-2	TCONS_00000458	lincRNA	chr1	2730997	2731563	-	567	429	FIRST	2	chr1	2731392	2731563	172	172	100	40.0932	65.2681	1	TSS_SPL	MLT1H-int	LTR/ERVL-MaLR	chr1	2731202	2731670	-	28.27	Ancient
XLOC_000681	linc-MMEL1-2	TCONS_00000458	lincRNA	chr1	2730997	2731563	-	567	429	LAST	1	chr1	2730997	2731253	257	56	21.7899	13.0536	65.2681	1	PolyA	LTR12C	LTR/ERV1	chr1	2729664	2731052	+	8.77	LineageSpe
XLOC_000682	linc-MMEL1-3	TCONS_00000460	lincRNA	chr1	2976181	2978596	-	2416	1697	MIDDLE	2	chr1	2977065	2977168	104	104	100	6.12846	6.12846	5	Both_SPL	MIRb	SINE/MIR	chr1	2977050	2977208	+	29.76	Ancient
XLOC_000682	linc-MMEL1-3	TCONS_00001379	lincRNA	chr1	2976095	2977309	-	1215	506	FIRST	3	chr1	2977065	2977309	245	144	58.7755	28.4585	28.4585	5	SPL	MIRb	SINE/MIR	chr1	2977050	2977208	+	29.76	Ancient
XLOC_000682	linc-MMEL1-3	TCONS_00001380	lincRNA	chr1	2976993	2978038	-	1046	544	LAST	1	chr1	2976993	2977168	176	119	67.6136	21.875	21.875	5	SPL	MIRb	SINE/MIR	chr1	2977050	2977208	+	29.76	Ancient
XLOC_000683	linc-MEGF6-1	TCONS_00000461	lincRNA	chr1	3539754	3541307	-	1554	622	LAST	1	chr1	3539754	3540120	367	139	37.8747	22.3473	22.3473	2	SPL	LTR40c	LTR/ERVL	chr1	3539982	3540137	+	24.51	Ancient
XLOC_000683	linc-MEGF6-1	TCONS_00002281	lincRNA	chr1	3539429	3541333	-	1905	830	LAST	1	chr1	3539429	3540120	692	139	20.0867	16.747	16.747	2	SPL	LTR40c	LTR/ERVL	chr1	3539982	3540137	+	24.51	Ancient
XLOC_000684	linc-C1orf174-2	TCONS_00000462	lincRNA	chr1	4007209	4009040	-	1832	937	MIDDLE	2	chr1	4008017	4008655	639	105	16.4319	11.206	29.0288	2	SPL	MIRb	SINE/MIR	chr1	4008551	4008749	+	29.76	Ancient
XLOC_000684	linc-C1orf174-2	TCONS_00000462	lincRNA	chr1	4007209	4009040	-	1832	937	LAST	1	chr1	4007209	4007388	180	167	92.7778	17.8228	29.0288	2	SPL	L1MA4	LINE/L1	chr1	4007222	4007687	-	16.93	Ancient
XLOC_000684	linc-C1orf174-2	TCONS_00002282	lincRNA	chr1	4008044	4009026	-	983	716	LAST	1	chr1	4008044	4008655	612	105	17.1569	14.6648	14.6648	2	SPL	MIRb	SINE/MIR	chr1	4008551	4008749	+	29.76	Ancient
XLOC_000685	linc-C1orf174-3	TCONS_00001381	lincRNA	chr1	4615911	4616444	-	534	395	FIRST	2	chr1	4616309	4616444	136	117	86.0294	29.6203	72.6582	1	TSS	Charlie1b	DNA/hAT-Charlie	chr1	4616328	4616839	+	20.18	Ancient
XLOC_000685	linc-C1orf174-3	TCONS_00001381	lincRNA	chr1	4615911	4616444	-	534	395	LAST	1	chr1	4615911	4616169	259	39	15.0579	9.87342	72.6582	1	SPL	MIRb	SINE/MIR	chr1	4616131	4616266	-	29.76	Ancient
XLOC_000685	linc-C1orf174-3	TCONS_00001381	lincRNA	chr1	4615911	4616444	-	534	395	LAST	1	chr1	4615911	4616169	259	131	50.5792	33.1646	72.6582	1	exonized	LTR79	LTR/ERVL	chr1	4615930	4616060	-	28.72	Ancient
XLOC_000686	linc-C1orf174-4	TCONS_00001382	lincRNA	chr1	5058062	5058786	-	725	277	FIRST	2	chr1	5058681	5058786	106	96	90.566	34.657	42.9603	1	TSS	LTR16E2	LTR/ERVL	chr1	5058691	5059020	+	31.31	Ancient
XLOC_000686	linc-C1orf174-4	TCONS_00001382	lincRNA	chr1	5058062	5058786	-	725	277	LAST	1	chr1	5058062	5058232	171	23	13.4503	8.30325	42.9603	1	SPL	THE1B	LTR/ERVL-MaLR	chr1	5058210	5058574	-	12.8	LineageSpe
XLOC_000688	linc-C1orf174-1	TCONS_00000077	lincRNA	chr1	5621769	5728315	-	106547	847	FIRST	3	chr1	5728201	5728315	115	20	17.3913	2.36128	85.5962	2	TSS	LTR41B	LTR/ERVL	chr1	5728296	5728585	+	25.54	Ancient
XLOC_000688	linc-C1orf174-1	TCONS_00000077	lincRNA	chr1	5621769	5728315	-	106547	847	MIDDLE	2	chr1	5623230	5623415	186	81	43.5484	9.56316	85.5962	2	SPL	AluSx	SINE/Alu	chr1	5623335	5623448	+	11.66	LineageSpe
XLOC_000688	linc-C1orf174-1	TCONS_00000077	lincRNA	chr1	5621769	5728315	-	106547	847	MIDDLE	2	chr1	5623230	5623415	186	105	56.4516	12.3967	85.5962	2	SPL	MSTA-int	LTR/ERVL-MaLR	chr1	5622153	5623334	-	17.65	LineageSpe
XLOC_000688	linc-C1orf174-1	TCONS_00000077	lincRNA	chr1	5621769	5728315	-	106547	847	LAST	1	chr1	5621769	5622314	546	153	28.022	18.0638	85.5962	2	PolyA	MSTA	LTR/ERVL-MaLR	chr1	5621720	5621921	-	14.8	LineageSpe
XLOC_000688	linc-C1orf174-1	TCONS_00000077	lincRNA	chr1	5621769	5728315	-	106547	847	LAST	1	chr1	5621769	5622314	546	204	37.3626	24.085	85.5962	2	exonized	MSTA	LTR/ERVL-MaLR	chr1	5621949	5622152	-	14.8	LineageSpe
XLOC_000688	linc-C1orf174-1	TCONS_00000077	lincRNA	chr1	5621769	5728315	-	106547	847	LAST	1	chr1	5621769	5622314	546	162	29.6703	19.1263	85.5962	2	SPL	MSTA-int	LTR/ERVL-MaLR	chr1	5622153	5623334	-	17.65	LineageSpe
XLOC_000688	linc-C1orf174-1	TCONS_00000464	lincRNA	chr1	5647428	5728355	-	80928	363	FIRST	2	chr1	5728201	5728355	155	60	38.7097	16.5289	73.8292	2	TSS	LTR41B	LTR/ERVL	chr1	5728296	5728585	+	25.54	Ancient
XLOC_000688	linc-C1orf174-1	TCONS_00000464	lincRNA	chr1	5647428	5728355	-	80928	363	LAST	1	chr1	5647428	5647635	208	45	21.6346	12.3967	73.8292	2	PolyA	MLT1A1	LTR/ERVL-MaLR	chr1	5647092	5647472	+	19.28	Ancient
XLOC_000688	linc-C1orf174-1	TCONS_00000464	lincRNA	chr1	5647428	5728355	-	80928	363	LAST	1	chr1	5647428	5647635	208	163	78.3654	44.9036	73.8292	2	SPL	LTR79	LTR/ERVL	chr1	5647473	5647860	+	28.72	Ancient
XLOC_000695	linc-TNFRSF9-1	TCONS_00000467	lincRNA	chr1	8066074	8066784	-	711	410	LAST	1	chr1	8066074	8066271	198	198	100	48.2927	48.2927	2	PolyA_SPL	AluSz	SINE/Alu	chr1	8065982	8066286	-	12.11	LineageSpe
XLOC_000695	linc-TNFRSF9-1	TCONS_00001384	lincRNA	chr1	8062789	8067529	-	4741	2884	LAST	1	chr1	8062789	8064618	1830	147	8.03279	5.09709	27.1151	2	exonized	HAL1ME	LINE/L1	chr1	8063127	8063273	-	29.17	Ancient
XLOC_000695	linc-TNFRSF9-1	TCONS_00001384	lincRNA	chr1	8062789	8067529	-	4741	2884	FIRST	2	chr1	8066476	8067529	1054	297	28.1784	10.2982	27.1151	2	exonized	AluSg	SINE/Alu	chr1	8067066	8067362	-	10.37	LineageSpe
XLOC_000695	linc-TNFRSF9-1	TCONS_00001384	lincRNA	chr1	8062789	8067529	-	4741	2884	LAST	1	chr1	8062789	8064618	1830	36	1.96721	1.24827	27.1151	2	PolyA	HAL1ME	LINE/L1	chr1	8062717	8062824	-	29.17	Ancient
XLOC_000695	linc-TNFRSF9-1	TCONS_00001384	lincRNA	chr1	8062789	8067529	-	4741	2884	LAST	1	chr1	8062789	8064618	1830	302	16.5027	10.4716	27.1151	2	exonized	AluSz	SINE/Alu	chr1	8062825	8063126	-	12.11	LineageSpe
XLOC_000696	linc-ERRFI1-1	TCONS_00000468	lincRNA	chr1	8278250	8280589	-	2340	477	LAST	1	chr1	8278250	8278593	344	144	41.8605	30.1887	30.1887	1	PolyA	AluYa5	SINE/Alu	chr1	8278247	8278393	-	1.34	LineageSpe
XLOC_000697	linc-GPR157-3	TCONS_00001385	lincRNA	chr1	9474622	9487071	-	12450	1373	FIRST	2	chr1	9485723	9487071	1349	91	6.74574	6.62782	21.5586	2	TSS	AluSx	SINE/Alu	chr1	9486981	9487276	-	11.66	LineageSpe
XLOC_000697	linc-GPR157-3	TCONS_00001385	lincRNA	chr1	9474622	9487071	-	12450	1373	FIRST	2	chr1	9485723	9487071	1349	205	15.1964	14.9308	21.5586	2	exonized	MIRb	SINE/MIR	chr1	9485863	9486067	-	29.76	Ancient
XLOC_000697	linc-GPR157-3	TCONS_00002288	lincRNA	chr1	9486352	9489003	-	2652	1112	LAST	1	chr1	9486352	9487440	1089	296	27.1809	26.6187	26.6187	2	exonized	AluSx	SINE/Alu	chr1	9486981	9487276	-	11.66	LineageSpe
XLOC_000698	linc-GPR157-2	TCONS_00001386	lincRNA	chr1	9509253	9514916	-	5664	430	FIRST	3	chr1	9514893	9514916	24	18	75	4.18605	4.18605	1	TSS	AluSx4	SINE/Alu	chr1	9514899	9515025	+	10.17	LineageSpe
XLOC_000699	linc-GPR157-1	TCONS_00000469	lincRNA	chr1	9561151	9563530	-	2380	708	LAST	1	chr1	9561151	9561607	457	29	6.34573	4.09605	24.2938	1	PolyA	MER91B	DNA/hAT-Tip100	chr1	9560988	9561179	+	26.24	Ancient
XLOC_000699	linc-GPR157-1	TCONS_00000469	lincRNA	chr1	9561151	9563530	-	2380	708	LAST	1	chr1	9561151	9561607	457	143	31.291	20.1977	24.2938	1	SPL	MIRb	SINE/MIR	chr1	9561465	9561686	+	29.76	Ancient
XLOC_000701	linc-MTOR-1	TCONS_00001387	lincRNA	chr1	11371804	11374861	-	3058	857	FIRST	2	chr1	11374662	11374861	200	52	26	6.06768	17.9697	1	SPL	L1MB3	LINE/L1	chr1	11374618	11374713	-	17.82	Ancient
XLOC_000701	linc-MTOR-1	TCONS_00001387	lincRNA	chr1	11371804	11374861	-	3058	857	LAST	1	chr1	11371804	11372460	657	102	15.5251	11.902	17.9697	1	exonized	MIRb	SINE/MIR	chr1	11372033	11372134	-	29.76	Ancient
XLOC_000708	linc-LRRC38-8	TCONS_00000471	lincRNA	chr1	14548386	14549613	-	1228	282	FIRST	2	chr1	14549549	14549613	65	65	100	23.0496	23.0496	1	TSS_SPL	LTR41B	LTR/ERVL	chr1	14549442	14549713	-	25.54	Ancient
XLOC_000710	linc-LRRC38-2	TCONS_00000472	lincRNA	chr1	14675450	14677518	-	2069	579	LAST	1	chr1	14675450	14675873	424	134	31.6038	23.1434	26.2522	1	exonized	L2b	LINE/L2	chr1	14675462	14675595	-	32.38	Ancient
XLOC_000710	linc-LRRC38-2	TCONS_00000472	lincRNA	chr1	14675450	14677518	-	2069	579	LAST	1	chr1	14675450	14675873	424	18	4.24528	3.10881	26.2522	1	SPL	MER102c	DNA/hAT-Charlie	chr1	14675856	14676158	+	28.32	Ancient
XLOC_000711	linc-LRRC38-3	TCONS_00001393	lincRNA	chr1	14717205	14746458	-	29254	625	LAST	1	chr1	14717205	14717240	36	36	100	5.76	94.56	2	PolyA_SPL	MLT1A1	LTR/ERVL-MaLR	chr1	14717118	14717443	-	19.28	Ancient
XLOC_000711	linc-LRRC38-3	TCONS_00001393	lincRNA	chr1	14717205	14746458	-	29254	625	FIRST	3	chr1	14745990	14746458	469	435	92.7505	69.6	94.56	2	TSS	LTR12C	LTR/ERV1	chr1	14746024	14747581	-	8.77	LineageSpe
XLOC_000711	linc-LRRC38-3	TCONS_00001393	lincRNA	chr1	14717205	14746458	-	29254	625	MIDDLE	2	chr1	14717955	14718074	120	120	100	19.2	94.56	2	Both_SPL	L2	LINE/L2	chr1	14717696	14718093	+	32.38	Ancient
XLOC_000711	linc-LRRC38-3	TCONS_00001394	lincRNA	chr1	14717545	14746458	-	28914	999	FIRST	2	chr1	14745990	14746458	469	435	92.7505	43.5435	96.3964	2	TSS	LTR12C	LTR/ERV1	chr1	14746024	14747581	-	8.77	LineageSpe
XLOC_000711	linc-LRRC38-3	TCONS_00001394	lincRNA	chr1	14717545	14746458	-	28914	999	LAST	1	chr1	14717545	14718074	530	149	28.1132	14.9149	96.3964	2	PolyA	L2a	LINE/L2	chr1	14717444	14717693	-	29.37	Ancient
XLOC_000711	linc-LRRC38-3	TCONS_00001394	lincRNA	chr1	14717545	14746458	-	28914	999	LAST	1	chr1	14717545	14718074	530	379	71.5094	37.9379	96.3964	2	SPL	L2	LINE/L2	chr1	14717696	14718093	+	32.38	Ancient
XLOC_000712	linc-LRRC38-1	TCONS_00001395	lincRNA	chr1	14923167	14924613	-	1447	391	LAST	1	chr1	14923167	14923333	167	167	100	42.711	42.711	1	PolyA_SPL	L1MB5	LINE/L1	chr1	14922934	14923528	-	19.6	Ancient
XLOC_000721	linc-AGMAT-3	TCONS_00001406	lincRNA	chr1	16123397	16126839	-	3443	282	LAST	1	chr1	16123397	16123438	42	36	85.7143	12.766	12.766	1	SPL	L1MD3	LINE/L1	chr1	16123403	16123564	+	21.85	Ancient
XLOC_000723	linc-RCC2-1	TCONS_00001408	lincRNA	chr1	18328349	18335092	-	6744	251	MIDDLE	2	chr1	18331835	18332038	204	119	58.3333	47.4104	47.4104	1	exonized	MLT1H	LTR/ERVL-MaLR	chr1	18331858	18331976	+	26.7	Ancient
XLOC_000724	linc-RCC2-2	TCONS_00001409	lincRNA	chr1	18335986	18337010	-	1025	710	FIRST	2	chr1	18336430	18337010	581	153	26.3339	21.5493	38.8732	1	exonized	MLT1K	LTR/ERVL-MaLR	chr1	18336682	18336834	-	29.25	Ancient
XLOC_000724	linc-RCC2-2	TCONS_00001409	lincRNA	chr1	18335986	18337010	-	1025	710	FIRST	2	chr1	18336430	18337010	581	123	21.1704	17.3239	38.8732	1	TSS	MLT1K	LTR/ERVL-MaLR	chr1	18336888	18337288	-	29.25	Ancient
XLOC_000730	linc-PLA2G2C-1	TCONS_00000016	lincRNA	chr1	20686294	20755287	-	68994	3783	MIDDLE	9	chr1	20727428	20727480	53	53	100	1.401	30.3727	7	Both_SPL	MIRb	SINE/MIR	chr1	20727383	20727610	+	29.76	Ancient
XLOC_000730	linc-PLA2G2C-1	TCONS_00000016	lincRNA	chr1	20686294	20755287	-	68994	3783	MIDDLE	6	chr1	20705466	20705519	54	54	100	1.42744	30.3727	7	Both_SPL	THE1B	LTR/ERVL-MaLR	chr1	20705383	20705748	-	12.8	LineageSpe
XLOC_000730	linc-PLA2G2C-1	TCONS_00000016	lincRNA	chr1	20686294	20755287	-	68994	3783	MIDDLE	8	chr1	20725973	20726042	70	70	100	1.85038	30.3727	7	Both_SPL	MIRb	SINE/MIR	chr1	20725906	20726126	+	29.76	Ancient
XLOC_000730	linc-PLA2G2C-1	TCONS_00000016	lincRNA	chr1	20686294	20755287	-	68994	3783	MIDDLE	7	chr1	20724976	20725280	305	16	5.2459	0.422945	30.3727	7	SPL	MIRb	SINE/MIR	chr1	20724836	20724991	-	29.76	Ancient
XLOC_000730	linc-PLA2G2C-1	TCONS_00000016	lincRNA	chr1	20686294	20755287	-	68994	3783	MIDDLE	5	chr1	20704804	20704925	122	122	100	3.22495	30.3727	7	Both_SPL	AluJo	SINE/Alu	chr1	20704645	20704944	+	16.42	LineageSpe
XLOC_000730	linc-PLA2G2C-1	TCONS_00000016	lincRNA	chr1	20686294	20755287	-	68994	3783	MIDDLE	7	chr1	20724976	20725280	305	140	45.9016	3.70077	30.3727	7	SPL	L2c	LINE/L2	chr1	20725141	20725572	-	32.46	Ancient
XLOC_000730	linc-PLA2G2C-1	TCONS_00000016	lincRNA	chr1	20686294	20755287	-	68994	3783	MIDDLE	4	chr1	20703874	20704002	129	117	90.6977	3.09278	30.3727	7	SPL	L2b	LINE/L2	chr1	20703886	20704333	-	32.38	Ancient
XLOC_000730	linc-PLA2G2C-1	TCONS_00000016	lincRNA	chr1	20686294	20755287	-	68994	3783	LAST	1	chr1	20686294	20688534	2241	143	6.38108	3.78007	30.3727	7	exonized	Helitron2Na_Mam	RC?/Helitron?	chr1	20687080	20687222	-	28.35	Ancient
XLOC_000730	linc-PLA2G2C-1	TCONS_00000016	lincRNA	chr1	20686294	20755287	-	68994	3783	LAST	1	chr1	20686294	20688534	2241	94	4.19456	2.4848	30.3727	7	exonized	LTR16C	LTR/ERVL	chr1	20686925	20687018	-	28.16	Ancient
XLOC_000730	linc-PLA2G2C-1	TCONS_00000016	lincRNA	chr1	20686294	20755287	-	68994	3783	LAST	1	chr1	20686294	20688534	2241	340	15.1718	8.98758	30.3727	7	PolyA	LTR16C	LTR/ERVL	chr1	20686255	20686633	-	28.16	Ancient
XLOC_000730	linc-PLA2G2C-1	TCONS_00000478	lincRNA	chr1	20724598	20755232	-	30635	785	MIDDLE	2	chr1	20724976	20725280	305	140	45.9016	17.8344	19.8726	7	SPL	L2c	LINE/L2	chr1	20725141	20725572	-	32.46	Ancient
XLOC_000730	linc-PLA2G2C-1	TCONS_00000478	lincRNA	chr1	20724598	20755232	-	30635	785	MIDDLE	2	chr1	20724976	20725280	305	16	5.2459	2.03822	19.8726	7	SPL	MIRb	SINE/MIR	chr1	20724836	20724991	-	29.76	Ancient
XLOC_000730	linc-PLA2G2C-1	TCONS_00000479	lincRNA	chr1	20725209	20757727	-	32519	354	FIRST	5	chr1	20757670	20757727	58	14	24.1379	3.9548	30.226	7	TSS	UCON21	DNA?	chr1	20757714	20757792	+	28.56	Ancient
XLOC_000730	linc-PLA2G2C-1	TCONS_00000479	lincRNA	chr1	20725209	20757727	-	32519	354	MIDDLE	2	chr1	20725973	20726042	70	70	100	19.774	30.226	7	Both_SPL	MIRb	SINE/MIR	chr1	20725906	20726126	+	29.76	Ancient
XLOC_000730	linc-PLA2G2C-1	TCONS_00000479	lincRNA	chr1	20725209	20757727	-	32519	354	LAST	1	chr1	20725209	20725231	23	23	100	6.49718	30.226	7	PolyA_SPL	L2c	LINE/L2	chr1	20725141	20725572	-	32.46	Ancient
XLOC_000730	linc-PLA2G2C-1	TCONS_00001412	lincRNA	chr1	20723758	20725007	-	1250	993	FIRST	2	chr1	20724976	20725007	32	16	50	1.61128	37.0594	7	SPL	MIRb	SINE/MIR	chr1	20724836	20724991	-	29.76	Ancient
XLOC_000730	linc-PLA2G2C-1	TCONS_00001412	lincRNA	chr1	20723758	20725007	-	1250	993	LAST	1	chr1	20723758	20724718	961	210	21.8522	21.148	37.0594	7	PolyA	AluSz	SINE/Alu	chr1	20723639	20723967	+	12.11	LineageSpe
XLOC_000730	linc-PLA2G2C-1	TCONS_00001412	lincRNA	chr1	20723758	20725007	-	1250	993	LAST	1	chr1	20723758	20724718	961	142	14.7763	14.3001	37.0594	7	exonized	MIR	SINE/MIR	chr1	20724433	20724574	+	27.84	Ancient
XLOC_000730	linc-PLA2G2C-1	TCONS_00002304	lincRNA	chr1	20699434	20704252	-	4819	1177	FIRST	2	chr1	20703874	20704252	379	367	96.8338	31.181	39.8471	7	TSS	L2b	LINE/L2	chr1	20703886	20704333	-	32.38	Ancient
XLOC_000730	linc-PLA2G2C-1	TCONS_00002304	lincRNA	chr1	20699434	20704252	-	4819	1177	LAST	1	chr1	20699434	20700231	798	102	12.782	8.6661	39.8471	7	exonized	L1MA4	LINE/L1	chr1	20699462	20699563	-	16.93	Ancient
XLOC_000731	linc-PLA2G2C-2	TCONS_00000480	lincRNA	chr1	20738797	20739746	-	950	376	MIDDLE	2	chr1	20739061	20739147	87	31	35.6322	8.24468	88.8298	1	SPL	L2a	LINE/L2	chr1	20739117	20739533	-	29.37	Ancient
XLOC_000731	linc-PLA2G2C-2	TCONS_00000480	lincRNA	chr1	20738797	20739746	-	950	376	LAST	1	chr1	20738797	20738975	179	54	30.1676	14.3617	88.8298	1	SPL	Charlie15a	DNA/hAT-Charlie	chr1	20738922	20739074	+	29.15	Ancient
XLOC_000731	linc-PLA2G2C-2	TCONS_00000480	lincRNA	chr1	20738797	20739746	-	950	376	FIRST	3	chr1	20739637	20739746	110	110	100	29.2553	88.8298	1	TSS_SPL	MIR3	SINE/MIR	chr1	20739635	20739771	-	29.77	Ancient
XLOC_000731	linc-PLA2G2C-2	TCONS_00000480	lincRNA	chr1	20738797	20739746	-	950	376	MIDDLE	2	chr1	20739061	20739147	87	14	16.092	3.7234	88.8298	1	SPL	Charlie15a	DNA/hAT-Charlie	chr1	20738922	20739074	+	29.15	Ancient
XLOC_000731	linc-PLA2G2C-2	TCONS_00000480	lincRNA	chr1	20738797	20739746	-	950	376	LAST	1	chr1	20738797	20738975	179	125	69.8324	33.2447	88.8298	1	PolyA	L1PA16	LINE/L1	chr1	20738770	20738921	-	14.52	LineageSpe
XLOC_000732	linc-HSPG2-1	TCONS_00000481	lincRNA	chr1	22350487	22351461	-	975	615	FIRST	2	chr1	22351299	22351461	163	100	61.3497	16.2602	32.0325	3	SPL	AluSx1	SINE/Alu	chr1	22351115	22351398	-	11.14	LineageSpe
XLOC_000732	linc-HSPG2-1	TCONS_00000481	lincRNA	chr1	22350487	22351461	-	975	615	LAST	1	chr1	22350487	22350938	452	97	21.4602	15.7724	32.0325	3	exonized	MIR3	SINE/MIR	chr1	22350587	22350683	-	29.77	Ancient
XLOC_000732	linc-HSPG2-1	TCONS_00001413	lincRNA	chr1	22350720	22352724	-	2005	487	FIRST	2	chr1	22352457	22352724	268	161	60.0746	33.0595	33.0595	3	SPL	MIRb	SINE/MIR	chr1	22352438	22352617	+	29.76	Ancient
XLOC_000732	linc-HSPG2-1	TCONS_00001414	lincRNA	chr1	22350814	22351845	-	1032	568	FIRST	3	chr1	22351553	22351845	293	115	39.2491	20.2465	37.8521	3	TSS	MIRb	SINE/MIR	chr1	22351731	22351859	-	29.76	Ancient
XLOC_000732	linc-HSPG2-1	TCONS_00001414	lincRNA	chr1	22350814	22351845	-	1032	568	MIDDLE	2	chr1	22351299	22351448	150	100	66.6667	17.6056	37.8521	3	SPL	AluSx1	SINE/Alu	chr1	22351115	22351398	-	11.14	LineageSpe
XLOC_000733	linc-WNT4-1	TCONS_00001415	lincRNA	chr1	22744726	22745435	-	710	321	FIRST	2	chr1	22745334	22745435	102	32	31.3725	9.96885	9.96885	1	TSS	MIRb	SINE/MIR	chr1	22745404	22745473	+	29.76	Ancient
XLOC_000734	linc-HTR1D-1	TCONS_00001416	lincRNA	chr1	23608315	23610576	-	2262	1381	LAST	1	chr1	23608315	23609606	1292	75	5.80495	5.43085	19.551	1	exonized	L2c	LINE/L2	chr1	23608741	23608815	+	32.46	Ancient
XLOC_000734	linc-HTR1D-1	TCONS_00001416	lincRNA	chr1	23608315	23610576	-	2262	1381	LAST	1	chr1	23608315	23609606	1292	195	15.0929	14.1202	19.551	1	exonized	MIR	SINE/MIR	chr1	23608406	23608600	+	27.84	Ancient
XLOC_000735	linc-E2F2-1	TCONS_00000482	lincRNA	chr1	23875630	23877406	-	1777	456	LAST	1	chr1	23875630	23875934	305	129	42.2951	28.2895	66.4474	1	PolyA	Charlie16a	DNA/hAT-Charlie	chr1	23875601	23875758	+	27.55	Ancient
XLOC_000735	linc-E2F2-1	TCONS_00000482	lincRNA	chr1	23875630	23877406	-	1777	456	LAST	1	chr1	23875630	23875934	305	174	57.0492	38.1579	66.4474	1	SPL	MIR	SINE/MIR	chr1	23875761	23875940	-	27.84	Ancient
XLOC_000736	linc-E2F2-2	TCONS_00001417	lincRNA	chr1	23877741	23878134	-	394	230	FIRST	2	chr1	23878112	23878134	23	19	82.6087	8.26087	27.3913	1	TSS	AluJb	SINE/Alu	chr1	23878116	23878405	+	16.49	LineageSpe
XLOC_000736	linc-E2F2-2	TCONS_00001417	lincRNA	chr1	23877741	23878134	-	394	230	LAST	1	chr1	23877741	23877947	207	44	21.256	19.1304	27.3913	1	PolyA	MIRb	SINE/MIR	chr1	23877609	23877784	-	29.76	Ancient
XLOC_000737	linc-E2F2-3	TCONS_00001418	lincRNA	chr1	23878413	23881254	-	2842	444	LAST	1	chr1	23878413	23878564	152	66	43.4211	14.8649	14.8649	1	PolyA	MIRb	SINE/MIR	chr1	23878406	23878478	-	29.76	Ancient
XLOC_000738	linc-ID3-1	TCONS_00000483	lincRNA	chr1	23940283	23945957	-	5675	1729	FIRST	2	chr1	23945768	23945957	190	116	61.0526	6.70908	45.3441	1	exonized	MIRc	SINE/MIR	chr1	23945811	23945926	-	29.57	Ancient
XLOC_000738	linc-ID3-1	TCONS_00000483	lincRNA	chr1	23940283	23945957	-	5675	1729	LAST	1	chr1	23940283	23941821	1539	158	10.2664	9.13823	45.3441	1	exonized	MIR	SINE/MIR	chr1	23940304	23940461	-	27.84	Ancient
XLOC_000738	linc-ID3-1	TCONS_00000483	lincRNA	chr1	23940283	23945957	-	5675	1729	LAST	1	chr1	23940283	23941821	1539	190	12.3457	10.989	45.3441	1	exonized	MIRb	SINE/MIR	chr1	23941027	23941216	+	29.76	Ancient
XLOC_000738	linc-ID3-1	TCONS_00000483	lincRNA	chr1	23940283	23945957	-	5675	1729	LAST	1	chr1	23940283	23941821	1539	127	8.25211	7.34529	45.3441	1	exonized	MIR3	SINE/MIR	chr1	23941413	23941539	+	29.77	Ancient
XLOC_000738	linc-ID3-1	TCONS_00000483	lincRNA	chr1	23940283	23945957	-	5675	1729	LAST	1	chr1	23940283	23941821	1539	193	12.5406	11.1625	45.3441	1	exonized	MIR	SINE/MIR	chr1	23940760	23940952	-	27.84	Ancient
XLOC_000741	linc-IL28RA-1	TCONS_00001425	lincRNA	chr1	24523479	24526136	-	2658	1388	LAST	1	chr1	24523479	24524820	1342	111	8.27124	7.99712	70.4611	1	PolyA	AluSg4	SINE/Alu	chr1	24523286	24523589	-	10.11	LineageSpe
XLOC_000741	linc-IL28RA-1	TCONS_00001425	lincRNA	chr1	24523479	24526136	-	2658	1388	LAST	1	chr1	24523479	24524820	1342	24	1.78838	1.72911	70.4611	1	SPL	L3b	LINE/CR1	chr1	24524797	24524839	-	32.67	Ancient
XLOC_000741	linc-IL28RA-1	TCONS_00001425	lincRNA	chr1	24523479	24526136	-	2658	1388	LAST	1	chr1	24523479	24524820	1342	313	23.3234	22.5504	70.4611	1	exonized	AluSx	SINE/Alu	chr1	24523922	24524234	-	11.66	LineageSpe
XLOC_000741	linc-IL28RA-1	TCONS_00001425	lincRNA	chr1	24523479	24526136	-	2658	1388	LAST	1	chr1	24523479	24524820	1342	198	14.7541	14.2651	70.4611	1	exonized	L1ME3G	LINE/L1	chr1	24524235	24524432	-	27.94	Ancient
XLOC_000741	linc-IL28RA-1	TCONS_00001425	lincRNA	chr1	24523479	24526136	-	2658	1388	LAST	1	chr1	24523479	24524820	1342	332	24.7392	23.9193	70.4611	1	exonized	L1ME3G	LINE/L1	chr1	24523590	24523921	-	27.94	Ancient
XLOC_000743	linc-C1orf201-1	TCONS_00001427	lincRNA	chr1	24822805	24826592	-	3788	732	FIRST	2	chr1	24826143	24826592	450	183	40.6667	25	98.4973	2	SPL	LTR33	LTR/ERVL	chr1	24825867	24826325	-	29.01	Ancient
XLOC_000743	linc-C1orf201-1	TCONS_00001427	lincRNA	chr1	24822805	24826592	-	3788	732	LAST	1	chr1	24822805	24823086	282	241	85.461	32.9235	98.4973	2	SPL	MLT1J	LTR/ERVL-MaLR	chr1	24822846	24823108	-	28.52	Ancient
XLOC_000743	linc-C1orf201-1	TCONS_00001427	lincRNA	chr1	24822805	24826592	-	3788	732	LAST	1	chr1	24822805	24823086	282	30	10.6383	4.09836	98.4973	2	PolyA	L2a	LINE/L2	chr1	24822631	24822834	-	29.37	Ancient
XLOC_000743	linc-C1orf201-1	TCONS_00001427	lincRNA	chr1	24822805	24826592	-	3788	732	FIRST	2	chr1	24826143	24826592	450	267	59.3333	36.4754	98.4973	2	TSS	MLT1K	LTR/ERVL-MaLR	chr1	24826326	24826605	+	29.25	Ancient
XLOC_000743	linc-C1orf201-1	TCONS_00001428	lincRNA	chr1	24822805	24829143	-	6339	622	MIDDLE	2	chr1	24826143	24826201	59	59	100	9.48553	53.0547	2	Both_SPL	LTR33	LTR/ERVL	chr1	24825867	24826325	-	29.01	Ancient
XLOC_000743	linc-C1orf201-1	TCONS_00001428	lincRNA	chr1	24822805	24829143	-	6339	622	LAST	1	chr1	24822805	24823086	282	30	10.6383	4.82315	53.0547	2	PolyA	L2a	LINE/L2	chr1	24822631	24822834	-	29.37	Ancient
XLOC_000743	linc-C1orf201-1	TCONS_00001428	lincRNA	chr1	24822805	24829143	-	6339	622	LAST	1	chr1	24822805	24823086	282	241	85.461	38.746	53.0547	2	SPL	MLT1J	LTR/ERVL-MaLR	chr1	24822846	24823108	-	28.52	Ancient
XLOC_000744	linc-C1orf201-2	TCONS_00000487	lincRNA	chr1	24863138	24865371	-	2234	420	FIRST	2	chr1	24865194	24865371	178	11	6.17978	2.61905	17.8571	3	SPL	AluY	SINE/Alu	chr1	24864871	24865204	-	6.92	LineageSpe
XLOC_000744	linc-C1orf201-2	TCONS_00000487	lincRNA	chr1	24863138	24865371	-	2234	420	FIRST	2	chr1	24865194	24865371	178	64	35.9551	15.2381	17.8571	3	TSS	FLAM_A	SINE/Alu	chr1	24865308	24865434	+	18.67	LineageSpe
XLOC_000744	linc-C1orf201-2	TCONS_00001429	lincRNA	chr1	24865095	24882323	-	17229	1450	MIDDLE	2	chr1	24878379	24878539	161	92	57.1429	6.34483	27.3793	3	exonized	MIR3	SINE/MIR	chr1	24878383	24878474	-	29.77	Ancient
XLOC_000744	linc-C1orf201-2	TCONS_00001429	lincRNA	chr1	24865095	24882323	-	17229	1450	LAST	1	chr1	24865095	24866366	1272	68	5.34591	4.68966	27.3793	3	exonized	MIR3	SINE/MIR	chr1	24865518	24865585	-	29.77	Ancient
XLOC_000744	linc-C1orf201-2	TCONS_00001429	lincRNA	chr1	24865095	24882323	-	17229	1450	LAST	1	chr1	24865095	24866366	1272	110	8.6478	7.58621	27.3793	3	PolyA	AluY	SINE/Alu	chr1	24864871	24865204	-	6.92	LineageSpe
XLOC_000744	linc-C1orf201-2	TCONS_00001429	lincRNA	chr1	24865095	24882323	-	17229	1450	LAST	1	chr1	24865095	24866366	1272	127	9.98428	8.75862	27.3793	3	exonized	FLAM_A	SINE/Alu	chr1	24865308	24865434	+	18.67	LineageSpe
XLOC_000744	linc-C1orf201-2	TCONS_00002307	lincRNA	chr1	24865095	24878444	-	13350	1338	FIRST	2	chr1	24878379	24878444	66	62	93.9394	4.63378	27.429	3	TSS	MIR3	SINE/MIR	chr1	24878383	24878474	-	29.77	Ancient
XLOC_000744	linc-C1orf201-2	TCONS_00002307	lincRNA	chr1	24865095	24878444	-	13350	1338	LAST	1	chr1	24865095	24866366	1272	110	8.6478	8.22123	27.429	3	PolyA	AluY	SINE/Alu	chr1	24864871	24865204	-	6.92	LineageSpe
XLOC_000744	linc-C1orf201-2	TCONS_00002307	lincRNA	chr1	24865095	24878444	-	13350	1338	LAST	1	chr1	24865095	24866366	1272	68	5.34591	5.08221	27.429	3	exonized	MIR3	SINE/MIR	chr1	24865518	24865585	-	29.77	Ancient
XLOC_000744	linc-C1orf201-2	TCONS_00002307	lincRNA	chr1	24865095	24878444	-	13350	1338	LAST	1	chr1	24865095	24866366	1272	127	9.98428	9.49178	27.429	3	exonized	FLAM_A	SINE/Alu	chr1	24865308	24865434	+	18.67	LineageSpe
XLOC_000745	linc-RUNX3-1	TCONS_00000488	lincRNA	chr1	25370198	25439610	-	69413	490	FIRST	3	chr1	25439370	25439610	241	84	34.8548	17.1429	43.6735	2	exonized	AluSz	SINE/Alu	chr1	25439439	25439522	+	12.11	LineageSpe
XLOC_000745	linc-RUNX3-1	TCONS_00000488	lincRNA	chr1	25370198	25439610	-	69413	490	LAST	1	chr1	25370198	25370327	130	130	100	26.5306	43.6735	2	PolyA_SPL	MLT1D	LTR/ERVL-MaLR	chr1	25370015	25370391	-	21.73	Ancient
XLOC_000745	linc-RUNX3-1	TCONS_00000489	lincRNA	chr1	25436949	25439611	-	2663	614	FIRST	2	chr1	25439370	25439611	242	84	34.7107	13.6808	13.6808	2	exonized	AluSz	SINE/Alu	chr1	25439439	25439522	+	12.11	LineageSpe
XLOC_000746	linc-C1orf63-1	TCONS_00000490	lincRNA	chr1	25579798	25594376	-	14579	777	LAST	1	chr1	25579798	25580428	631	76	12.0444	9.78121	55.2124	4	exonized	L1ME3G	LINE/L1	chr1	25580151	25580226	-	27.94	Ancient
XLOC_000746	linc-C1orf63-1	TCONS_00000490	lincRNA	chr1	25579798	25594376	-	14579	777	LAST	1	chr1	25579798	25580428	631	299	47.3851	38.4813	55.2124	4	exonized	AluSp	SINE/Alu	chr1	25579852	25580150	-	9.53	LineageSpe
XLOC_000746	linc-C1orf63-1	TCONS_00000490	lincRNA	chr1	25579798	25594376	-	14579	777	LAST	1	chr1	25579798	25580428	631	54	8.55784	6.94981	55.2124	4	PolyA	L1ME3G	LINE/L1	chr1	25579773	25579851	-	27.94	Ancient
XLOC_000746	linc-C1orf63-1	TCONS_00001430	lincRNA	chr1	25589071	25593390	-	4320	2904	LAST	1	chr1	25589071	25591787	2717	295	10.8576	10.1584	92.6997	4	exonized	L2a	LINE/L2	chr1	25589511	25589805	-	29.37	Ancient
XLOC_000746	linc-C1orf63-1	TCONS_00001430	lincRNA	chr1	25589071	25593390	-	4320	2904	LAST	1	chr1	25589071	25591787	2717	71	2.61318	2.4449	92.6997	4	SPL	L2a	LINE/L2	chr1	25591717	25591946	-	29.37	Ancient
XLOC_000746	linc-C1orf63-1	TCONS_00001430	lincRNA	chr1	25589071	25593390	-	4320	2904	LAST	1	chr1	25589071	25591787	2717	415	15.2742	14.2906	92.6997	4	PolyA	MLT2B3	LTR/ERVL	chr1	25588951	25589485	-	20.99	Ancient
XLOC_000746	linc-C1orf63-1	TCONS_00001430	lincRNA	chr1	25589071	25593390	-	4320	2904	LAST	1	chr1	25589071	25591787	2717	340	12.5138	11.708	92.6997	4	exonized	THE1B	LTR/ERVL-MaLR	chr1	25589806	25590145	-	12.8	LineageSpe
XLOC_000746	linc-C1orf63-1	TCONS_00001430	lincRNA	chr1	25589071	25593390	-	4320	2904	LAST	1	chr1	25589071	25591787	2717	1571	57.8211	54.0978	92.6997	4	exonized	THE1B-int	LTR/ERVL-MaLR	chr1	25590146	25591716	-	10.66	LineageSpe
XLOC_000746	linc-C1orf63-1	TCONS_00001431	lincRNA	chr1	25589878	25594374	-	4497	254	LAST	1	chr1	25589878	25589987	110	110	100	43.3071	43.3071	4	PolyA_SPL	THE1B	LTR/ERVL-MaLR	chr1	25589806	25590145	-	12.8	LineageSpe
XLOC_000746	linc-C1orf63-1	TCONS_00002308	lincRNA	chr1	25580139	25593294	-	13156	383	LAST	1	chr1	25580139	25580428	290	12	4.13793	3.13316	22.9765	4	PolyA	AluSp	SINE/Alu	chr1	25579852	25580150	-	9.53	LineageSpe
XLOC_000746	linc-C1orf63-1	TCONS_00002308	lincRNA	chr1	25580139	25593294	-	13156	383	LAST	1	chr1	25580139	25580428	290	76	26.2069	19.8433	22.9765	4	exonized	L1ME3G	LINE/L1	chr1	25580151	25580226	-	27.94	Ancient
XLOC_000751	linc-PAFAH2-2	TCONS_00001436	lincRNA	chr1	26325875	26331040	-	5166	582	FIRST	2	chr1	26330951	26331040	90	90	100	15.4639	45.7045	1	TSS_SPL	LTR16C	LTR/ERVL	chr1	26330864	26331070	+	28.16	Ancient
XLOC_000751	linc-PAFAH2-2	TCONS_00001436	lincRNA	chr1	26325875	26331040	-	5166	582	LAST	1	chr1	26325875	26326366	492	176	35.7724	30.2405	45.7045	1	SPL	Plat_L3	LINE/CR1	chr1	26326191	26326371	-	31.39	Ancient
XLOC_000754	linc-SLC9A1-1	TCONS_00000491	lincRNA	chr1	27555597	27560843	-	5247	379	MIDDLE	2	chr1	27559936	27560093	158	118	74.6835	31.1346	62.7968	2	SPL	MIR	SINE/MIR	chr1	27559976	27560125	+	27.84	Ancient
XLOC_000754	linc-SLC9A1-1	TCONS_00000491	lincRNA	chr1	27555597	27560843	-	5247	379	LAST	1	chr1	27555597	27555726	130	120	92.3077	31.6623	62.7968	2	PolyA	AluJb	SINE/Alu	chr1	27555420	27555716	-	16.49	LineageSpe
XLOC_000754	linc-SLC9A1-1	TCONS_00002324	lincRNA	chr1	27556670	27560974	-	4305	336	LAST	1	chr1	27556670	27556783	114	114	100	33.9286	33.9286	2	PolyA_SPL	AluSx3	SINE/Alu	chr1	27556505	27556816	+	11.23	LineageSpe
XLOC_000755	linc-FGR-1	TCONS_00000492	lincRNA	chr1	27986839	27989233	-	2395	441	LAST	1	chr1	27986839	27987233	395	328	83.038	74.3764	74.3764	1	SPL	L2b	LINE/L2	chr1	27986906	27987614	-	32.38	Ancient
XLOC_000757	linc-DNAJC8-2	TCONS_00001440	lincRNA	chr1	28567780	28573670	-	5891	738	FIRST	2	chr1	28573087	28573670	584	151	25.8562	20.4607	56.3686	2	exonized	AluSq2	SINE/Alu	chr1	28573450	28573600	-	10.62	LineageSpe
XLOC_000757	linc-DNAJC8-2	TCONS_00001440	lincRNA	chr1	28567780	28573670	-	5891	738	LAST	1	chr1	28567780	28567933	154	115	74.6753	15.5827	56.3686	2	SPL	AluJb	SINE/Alu	chr1	28567819	28567948	+	16.49	LineageSpe
XLOC_000757	linc-DNAJC8-2	TCONS_00001440	lincRNA	chr1	28567780	28573670	-	5891	738	FIRST	2	chr1	28573087	28573670	584	150	25.6849	20.3252	56.3686	2	SPL	L1ME3G	LINE/L1	chr1	28573017	28573236	-	27.94	Ancient
XLOC_000757	linc-DNAJC8-2	TCONS_00001441	lincRNA	chr1	28572056	28573385	-	1330	1248	LAST	1	chr1	28572056	28573264	1209	254	21.0091	20.3526	67.7885	2	PolyA	AluSx	SINE/Alu	chr1	28571988	28572309	-	11.66	LineageSpe
XLOC_000757	linc-DNAJC8-2	TCONS_00001441	lincRNA	chr1	28572056	28573385	-	1330	1248	LAST	1	chr1	28572056	28573264	1209	220	18.1969	17.6282	67.7885	2	exonized	L1ME3G	LINE/L1	chr1	28573017	28573236	-	27.94	Ancient
XLOC_000757	linc-DNAJC8-2	TCONS_00001441	lincRNA	chr1	28572056	28573385	-	1330	1248	LAST	1	chr1	28572056	28573264	1209	119	9.84285	9.53526	67.7885	2	exonized	FLAM_A	SINE/Alu	chr1	28572327	28572445	+	18.67	LineageSpe
XLOC_000757	linc-DNAJC8-2	TCONS_00001441	lincRNA	chr1	28572056	28573385	-	1330	1248	LAST	1	chr1	28572056	28573264	1209	253	20.9264	20.2724	67.7885	2	exonized	L1ME4a	LINE/L1	chr1	28572460	28572712	+	27.76	Ancient
XLOC_000762	linc-TAF12-2	TCONS_00000493	lincRNA	chr1	29196995	29203848	-	6854	1085	LAST	1	chr1	29196995	29197514	520	60	11.5385	5.52995	18.341	2	PolyA	AluSz	SINE/Alu	chr1	29196752	29197054	-	12.11	LineageSpe
XLOC_000762	linc-TAF12-2	TCONS_00000493	lincRNA	chr1	29196995	29203848	-	6854	1085	LAST	1	chr1	29196995	29197514	520	139	26.7308	12.8111	18.341	2	exonized	MIR3	SINE/MIR	chr1	29197363	29197501	+	29.77	Ancient
XLOC_000762	linc-TAF12-2	TCONS_00001444	lincRNA	chr1	29197459	29199074	-	1616	379	LAST	1	chr1	29197459	29197514	56	43	76.7857	11.3456	11.3456	2	PolyA	MIR3	SINE/MIR	chr1	29197363	29197501	+	29.77	Ancient
XLOC_000764	linc-MECR-4	TCONS_00000494	lincRNA	chr1	29656132	29676626	-	20495	2148	FIRST	3	chr1	29676195	29676626	432	60	13.8889	2.7933	59.0782	1	TSS	MLT1L	LTR/ERVL-MaLR	chr1	29676567	29676844	-	28.7	Ancient
XLOC_000764	linc-MECR-4	TCONS_00000494	lincRNA	chr1	29656132	29676626	-	20495	2148	MIDDLE	2	chr1	29659678	29659820	143	143	100	6.65736	59.0782	1	Both_SPL	ERVL-E-int	LTR/ERVL	chr1	29659520	29661289	+	30.69	Ancient
XLOC_000764	linc-MECR-4	TCONS_00000494	lincRNA	chr1	29656132	29676626	-	20495	2148	LAST	1	chr1	29656132	29657704	1573	57	3.62365	2.65363	59.0782	1	exonized	MIRb	SINE/MIR	chr1	29656877	29656933	-	29.76	Ancient
XLOC_000764	linc-MECR-4	TCONS_00000494	lincRNA	chr1	29656132	29676626	-	20495	2148	LAST	1	chr1	29656132	29657704	1573	158	10.0445	7.35568	59.0782	1	exonized	MIRb	SINE/MIR	chr1	29657311	29657468	-	29.76	Ancient
XLOC_000764	linc-MECR-4	TCONS_00000494	lincRNA	chr1	29656132	29676626	-	20495	2148	LAST	1	chr1	29656132	29657704	1573	151	9.59949	7.0298	59.0782	1	exonized	MIR3	SINE/MIR	chr1	29656965	29657115	+	29.77	Ancient
XLOC_000764	linc-MECR-4	TCONS_00000494	lincRNA	chr1	29656132	29676626	-	20495	2148	LAST	1	chr1	29656132	29657704	1573	550	34.965	25.6052	59.0782	1	exonized	L2b	LINE/L2	chr1	29656328	29656877	+	32.38	Ancient
XLOC_000764	linc-MECR-4	TCONS_00000494	lincRNA	chr1	29656132	29676626	-	20495	2148	LAST	1	chr1	29656132	29657704	1573	150	9.53592	6.98324	59.0782	1	exonized	MIR	SINE/MIR	chr1	29656166	29656315	-	27.84	Ancient
XLOC_000765	linc-MECR-3	TCONS_00000495	lincRNA	chr1	30181698	30182394	-	697	498	FIRST	2	chr1	30182171	30182394	224	119	53.125	23.8956	23.8956	1	exonized	MIRc	SINE/MIR	chr1	30182180	30182298	-	29.57	Ancient
XLOC_000766	linc-MECR-2	TCONS_00000079	lincRNA	chr1	30486799	30510456	-	23658	1516	MIDDLE	6	chr1	30509619	30509850	232	12	5.17241	0.791557	52.2427	2	SPL	MER5A	DNA/hAT-Charlie	chr1	30509839	30509919	-	25.27	Ancient
XLOC_000766	linc-MECR-2	TCONS_00000079	lincRNA	chr1	30486799	30510456	-	23658	1516	MIDDLE	6	chr1	30509619	30509850	232	130	56.0345	8.5752	52.2427	2	exonized	MLT1K	LTR/ERVL-MaLR	chr1	30509672	30509801	-	29.25	Ancient
XLOC_000766	linc-MECR-2	TCONS_00000079	lincRNA	chr1	30486799	30510456	-	23658	1516	MIDDLE	3	chr1	30489567	30489768	202	23	11.3861	1.51715	52.2427	2	SPL	Charlie1a	DNA/hAT-Charlie	chr1	30489746	30489930	+	20.36	Ancient
XLOC_000766	linc-MECR-2	TCONS_00000079	lincRNA	chr1	30486799	30510456	-	23658	1516	MIDDLE	5	chr1	30502137	30502337	201	58	28.8557	3.82586	52.2427	2	exonized	MIRc	SINE/MIR	chr1	30502217	30502274	+	29.57	Ancient
XLOC_000766	linc-MECR-2	TCONS_00000079	lincRNA	chr1	30486799	30510456	-	23658	1516	MIDDLE	3	chr1	30489567	30489768	202	179	88.6139	11.8074	52.2427	2	SPL	L1M4	LINE/L1	chr1	30489254	30489745	-	21.84	Ancient
XLOC_000766	linc-MECR-2	TCONS_00000079	lincRNA	chr1	30486799	30510456	-	23658	1516	MIDDLE	4	chr1	30497872	30498030	159	149	93.7107	9.8285	52.2427	2	exonized	L3	LINE/CR1	chr1	30497877	30498025	-	32.5	Ancient
XLOC_000766	linc-MECR-2	TCONS_00000079	lincRNA	chr1	30486799	30510456	-	23658	1516	MIDDLE	2	chr1	30488091	30488142	52	52	100	3.43008	52.2427	2	Both_SPL	MIR	SINE/MIR	chr1	30487989	30488145	+	27.84	Ancient
XLOC_000766	linc-MECR-2	TCONS_00000079	lincRNA	chr1	30486799	30510456	-	23658	1516	LAST	1	chr1	30486799	30487356	558	189	33.871	12.467	52.2427	2	exonized	MIR	SINE/MIR	chr1	30486874	30487062	-	27.84	Ancient
XLOC_000766	linc-MECR-2	TCONS_00000496	lincRNA	chr1	30486799	30510459	-	23661	2519	MIDDLE	6	chr1	30509619	30509850	232	12	5.17241	0.47638	52.0445	2	SPL	MER5A	DNA/hAT-Charlie	chr1	30509839	30509919	-	25.27	Ancient
XLOC_000766	linc-MECR-2	TCONS_00000496	lincRNA	chr1	30486799	30510459	-	23661	2519	MIDDLE	4	chr1	30496872	30498030	1159	73	6.29853	2.89798	52.0445	2	exonized	L2b	LINE/L2	chr1	30497023	30497095	-	32.38	Ancient
XLOC_000766	linc-MECR-2	TCONS_00000496	lincRNA	chr1	30486799	30510459	-	23661	2519	MIDDLE	3	chr1	30489567	30489768	202	23	11.3861	0.913061	52.0445	2	SPL	Charlie1a	DNA/hAT-Charlie	chr1	30489746	30489930	+	20.36	Ancient
XLOC_000766	linc-MECR-2	TCONS_00000496	lincRNA	chr1	30486799	30510459	-	23661	2519	MIDDLE	6	chr1	30509619	30509850	232	130	56.0345	5.16078	52.0445	2	exonized	MLT1K	LTR/ERVL-MaLR	chr1	30509672	30509801	-	29.25	Ancient
XLOC_000766	linc-MECR-2	TCONS_00000496	lincRNA	chr1	30486799	30510459	-	23661	2519	MIDDLE	5	chr1	30502137	30502337	201	58	28.8557	2.3025	52.0445	2	exonized	MIRc	SINE/MIR	chr1	30502217	30502274	+	29.57	Ancient
XLOC_000766	linc-MECR-2	TCONS_00000496	lincRNA	chr1	30486799	30510459	-	23661	2519	MIDDLE	3	chr1	30489567	30489768	202	179	88.6139	7.10599	52.0445	2	SPL	L1M4	LINE/L1	chr1	30489254	30489745	-	21.84	Ancient
XLOC_000766	linc-MECR-2	TCONS_00000496	lincRNA	chr1	30486799	30510459	-	23661	2519	MIDDLE	4	chr1	30496872	30498030	1159	149	12.8559	5.91505	52.0445	2	exonized	L3	LINE/CR1	chr1	30497877	30498025	-	32.5	Ancient
XLOC_000766	linc-MECR-2	TCONS_00000496	lincRNA	chr1	30486799	30510459	-	23661	2519	MIDDLE	2	chr1	30488091	30488142	52	52	100	2.06431	52.0445	2	Both_SPL	MIR	SINE/MIR	chr1	30487989	30488145	+	27.84	Ancient
XLOC_000766	linc-MECR-2	TCONS_00000496	lincRNA	chr1	30486799	30510459	-	23661	2519	LAST	1	chr1	30486799	30487356	558	189	33.871	7.50298	52.0445	2	exonized	MIR	SINE/MIR	chr1	30486874	30487062	-	27.84	Ancient
XLOC_000766	linc-MECR-2	TCONS_00000496	lincRNA	chr1	30486799	30510459	-	23661	2519	MIDDLE	4	chr1	30496872	30498030	1159	118	10.1812	4.6844	52.0445	2	exonized	MIRb	SINE/MIR	chr1	30497704	30497821	-	29.76	Ancient
XLOC_000766	linc-MECR-2	TCONS_00000496	lincRNA	chr1	30486799	30510459	-	23661	2519	MIDDLE	4	chr1	30496872	30498030	1159	328	28.3003	13.021	52.0445	2	exonized	LTR79	LTR/ERVL	chr1	30497186	30497513	-	28.72	Ancient
XLOC_000767	linc-MECR-1	TCONS_00000497	lincRNA	chr1	30882407	30884485	-	2079	507	MIDDLE	2	chr1	30883771	30883926	156	21	13.4615	4.14201	4.14201	1	SPL	MSTD	LTR/ERVL-MaLR	chr1	30883906	30884268	-	20.45	LineageSpe
XLOC_000768	linc-MECR-5	TCONS_00001446	lincRNA	chr1	31168512	31181236	-	12725	726	FIRST	3	chr1	31181113	31181236	124	26	20.9677	3.58127	3.58127	2	TSS	L1MA9	LINE/L1	chr1	31181211	31181270	+	18.85	Ancient
XLOC_000769	linc-LAPTM5-1	TCONS_00000498	lincRNA	chr1	31283225	31288400	-	5176	444	FIRST	2	chr1	31288294	31288400	107	75	70.0935	16.8919	16.8919	1	TSS	MIRb	SINE/MIR	chr1	31288326	31288553	+	29.76	Ancient
XLOC_000771	linc-FABP3-2	TCONS_00001448	lincRNA	chr1	31933168	31944351	-	11184	708	MIDDLE	2	chr1	31934169	31934254	86	86	100	12.1469	93.3616	1	Both_SPL	HERVIP10F-int	LTR/ERV1	chr1	31932218	31939531	+	19.46	LineageSpe
XLOC_000771	linc-FABP3-2	TCONS_00001448	lincRNA	chr1	31933168	31944351	-	11184	708	FIRST	3	chr1	31943913	31944351	439	255	58.0866	36.0169	93.3616	1	SPL	HERVIP10F-int	LTR/ERV1	chr1	31943613	31944167	-	19.46	LineageSpe
XLOC_000771	linc-FABP3-2	TCONS_00001448	lincRNA	chr1	31933168	31944351	-	11184	708	LAST	1	chr1	31933168	31933350	183	183	100	25.8475	93.3616	1	PolyA_SPL	HERVIP10F-int	LTR/ERV1	chr1	31932218	31939531	+	19.46	LineageSpe
XLOC_000771	linc-FABP3-2	TCONS_00001448	lincRNA	chr1	31933168	31944351	-	11184	708	FIRST	3	chr1	31943913	31944351	439	137	31.2073	19.3503	93.3616	1	TSS	LTR10A	LTR/ERV1	chr1	31944215	31944780	-	14.28	LineageSpe
XLOC_000772	linc-SPOCD1-1	TCONS_00000499	lincRNA	chr1	32307620	32321169	-	13550	2257	FIRST	2	chr1	32321042	32321169	128	78	60.9375	3.45591	67.346	1	SPL	L2a	LINE/L2	chr1	32321013	32321119	-	29.37	Ancient
XLOC_000772	linc-SPOCD1-1	TCONS_00000499	lincRNA	chr1	32307620	32321169	-	13550	2257	LAST	1	chr1	32307620	32309748	2129	92	4.32128	4.07621	67.346	1	exonized	L2a	LINE/L2	chr1	32308836	32308927	-	29.37	Ancient
XLOC_000772	linc-SPOCD1-1	TCONS_00000499	lincRNA	chr1	32307620	32321169	-	13550	2257	LAST	1	chr1	32307620	32309748	2129	65	3.05308	2.87993	67.346	1	exonized	LTR88c	LTR/Gypsy?	chr1	32308479	32308543	+	30.99	Ancient
XLOC_000772	linc-SPOCD1-1	TCONS_00000499	lincRNA	chr1	32307620	32321169	-	13550	2257	LAST	1	chr1	32307620	32309748	2129	115	5.4016	5.09526	67.346	1	SPL	AluJb	SINE/Alu	chr1	32309634	32309789	+	16.49	LineageSpe
XLOC_000772	linc-SPOCD1-1	TCONS_00000499	lincRNA	chr1	32307620	32321169	-	13550	2257	LAST	1	chr1	32307620	32309748	2129	115	5.4016	5.09526	67.346	1	exonized	L2b	LINE/L2	chr1	32308121	32308235	+	32.38	Ancient
XLOC_000772	linc-SPOCD1-1	TCONS_00000499	lincRNA	chr1	32307620	32321169	-	13550	2257	LAST	1	chr1	32307620	32309748	2129	164	7.70315	7.26628	67.346	1	exonized	MER91A	DNA/hAT-Tip100	chr1	32308672	32308835	+	30.69	Ancient
XLOC_000772	linc-SPOCD1-1	TCONS_00000499	lincRNA	chr1	32307620	32321169	-	13550	2257	LAST	1	chr1	32307620	32309748	2129	65	3.05308	2.87993	67.346	1	exonized	L2a	LINE/L2	chr1	32308603	32308667	-	29.37	Ancient
XLOC_000772	linc-SPOCD1-1	TCONS_00000499	lincRNA	chr1	32307620	32321169	-	13550	2257	LAST	1	chr1	32307620	32309748	2129	121	5.68342	5.3611	67.346	1	exonized	LTR88b	LTR/Gypsy?	chr1	32308270	32308390	-	30.56	Ancient
XLOC_000772	linc-SPOCD1-1	TCONS_00000499	lincRNA	chr1	32307620	32321169	-	13550	2257	LAST	1	chr1	32307620	32309748	2129	128	6.01221	5.67125	67.346	1	exonized	LTR88b	LTR/Gypsy?	chr1	32309295	32309422	-	30.56	Ancient
XLOC_000772	linc-SPOCD1-1	TCONS_00000499	lincRNA	chr1	32307620	32321169	-	13550	2257	LAST	1	chr1	32307620	32309748	2129	121	5.68342	5.3611	67.346	1	exonized	MIRb	SINE/MIR	chr1	32308935	32309055	-	29.76	Ancient
XLOC_000772	linc-SPOCD1-1	TCONS_00000499	lincRNA	chr1	32307620	32321169	-	13550	2257	LAST	1	chr1	32307620	32309748	2129	286	13.4335	12.6717	67.346	1	PolyA	AluYd8	SINE/Alu	chr1	32307609	32307905	-	1.89	LineageSpe
XLOC_000772	linc-SPOCD1-1	TCONS_00000499	lincRNA	chr1	32307620	32321169	-	13550	2257	LAST	1	chr1	32307620	32309748	2129	170	7.98497	7.53212	67.346	1	exonized	L1M5	LINE/L1	chr1	32309464	32309633	+	28.23	Ancient
XLOC_000776	linc-MARCKSL1-1	TCONS_00000501	lincRNA	chr1	32814795	32816264	-	1470	687	LAST	1	chr1	32814795	32815422	628	17	2.70701	2.47453	28.2387	1	SPL	AluY	SINE/Alu	chr1	32815406	32815652	+	6.92	LineageSpe
XLOC_000776	linc-MARCKSL1-1	TCONS_00000501	lincRNA	chr1	32814795	32816264	-	1470	687	LAST	1	chr1	32814795	32815422	628	83	13.2166	12.0815	28.2387	1	exonized	L2a	LINE/L2	chr1	32815323	32815405	-	29.37	Ancient
XLOC_000776	linc-MARCKSL1-1	TCONS_00000501	lincRNA	chr1	32814795	32816264	-	1470	687	LAST	1	chr1	32814795	32815422	628	94	14.9682	13.6827	28.2387	1	exonized	L3b	LINE/CR1	chr1	32814837	32814930	+	32.67	Ancient
XLOC_000777	linc-SYNC-1	TCONS_00001449	lincRNA	chr1	33171296	33171923	-	628	232	FIRST	2	chr1	33171863	33171923	61	31	50.8197	13.3621	112.069	1	TSS	MER21B	LTR/ERVL	chr1	33171893	33172072	-	18.46	Ancient
XLOC_000777	linc-SYNC-1	TCONS_00001449	lincRNA	chr1	33171296	33171923	-	628	232	FIRST	2	chr1	33171863	33171923	61	58	95.082	25	112.069	1	exonized	MLT1J	LTR/ERVL-MaLR	chr1	33171865	33171922	-	28.52	Ancient
XLOC_000777	linc-SYNC-1	TCONS_00001449	lincRNA	chr1	33171296	33171923	-	628	232	LAST	1	chr1	33171296	33171466	171	171	100	73.7069	112.069	1	PolyA_SPL	MLT1G1	LTR/ERVL-MaLR	chr1	33171198	33171728	-	26.57	Ancient
XLOC_000778	linc-SYNC-2	TCONS_00000502	lincRNA	chr1	33183335	33190838	-	7504	395	FIRST	2	chr1	33190679	33190838	160	75	46.875	18.9873	57.7215	1	SPL	MIRb	SINE/MIR	chr1	33190643	33190753	+	29.76	Ancient
XLOC_000778	linc-SYNC-2	TCONS_00000502	lincRNA	chr1	33183335	33190838	-	7504	395	LAST	1	chr1	33183335	33183569	235	153	65.1064	38.7342	57.7215	1	PolyA	AluJb	SINE/Alu	chr1	33183192	33183487	-	16.49	LineageSpe
XLOC_000782	linc-ZMYM6-1	TCONS_00001452	lincRNA	chr1	35606941	35611030	-	4090	2257	LAST	1	chr1	35606941	35608634	1694	87	5.13577	3.85467	97.5188	3	PolyA	Harlequin-int	LTR/ERV1	chr1	35606739	35607027	-	8.27	LineageSpe
XLOC_000782	linc-ZMYM6-1	TCONS_00001452	lincRNA	chr1	35606941	35611030	-	4090	2257	FIRST	2	chr1	35610468	35611030	563	563	100	24.9446	97.5188	3	TSS_SPL	HERV3-int	LTR/ERV1	chr1	35610357	35612165	-	20.41	LineageSpe
XLOC_000782	linc-ZMYM6-1	TCONS_00001452	lincRNA	chr1	35606941	35611030	-	4090	2257	LAST	1	chr1	35606941	35608634	1694	488	28.8076	21.6216	97.5188	3	exonized	LTR2C	LTR/ERV1	chr1	35607028	35607515	-	11.18	LineageSpe
XLOC_000782	linc-ZMYM6-1	TCONS_00001452	lincRNA	chr1	35606941	35611030	-	4090	2257	LAST	1	chr1	35606941	35608634	1694	354	20.8973	15.6845	97.5188	3	SPL	HERV3-int	LTR/ERV1	chr1	35608281	35609365	-	20.41	LineageSpe
XLOC_000782	linc-ZMYM6-1	TCONS_00001452	lincRNA	chr1	35606941	35611030	-	4090	2257	LAST	1	chr1	35606941	35608634	1694	709	41.8536	31.4134	97.5188	3	exonized	HERV3-int	LTR/ERV1	chr1	35607516	35608224	-	20.41	LineageSpe
XLOC_000782	linc-ZMYM6-1	TCONS_00001453	lincRNA	chr1	35606963	35611998	-	5036	1956	FIRST	3	chr1	35611900	35611998	99	99	100	5.06135	97.137	3	TSS_SPL	HERV3-int	LTR/ERV1	chr1	35610357	35612165	-	20.41	LineageSpe
XLOC_000782	linc-ZMYM6-1	TCONS_00001453	lincRNA	chr1	35606963	35611998	-	5036	1956	MIDDLE	2	chr1	35610468	35610652	185	185	100	9.45808	97.137	3	Both_SPL	HERV3-int	LTR/ERV1	chr1	35610357	35612165	-	20.41	LineageSpe
XLOC_000782	linc-ZMYM6-1	TCONS_00001453	lincRNA	chr1	35606963	35611998	-	5036	1956	LAST	1	chr1	35606963	35608634	1672	65	3.88756	3.32311	97.137	3	PolyA	Harlequin-int	LTR/ERV1	chr1	35606739	35607027	-	8.27	LineageSpe
XLOC_000782	linc-ZMYM6-1	TCONS_00001453	lincRNA	chr1	35606963	35611998	-	5036	1956	LAST	1	chr1	35606963	35608634	1672	488	29.1866	24.9489	97.137	3	exonized	LTR2C	LTR/ERV1	chr1	35607028	35607515	-	11.18	LineageSpe
XLOC_000782	linc-ZMYM6-1	TCONS_00001453	lincRNA	chr1	35606963	35611998	-	5036	1956	LAST	1	chr1	35606963	35608634	1672	709	42.4043	36.2474	97.137	3	exonized	HERV3-int	LTR/ERV1	chr1	35607516	35608224	-	20.41	LineageSpe
XLOC_000782	linc-ZMYM6-1	TCONS_00001453	lincRNA	chr1	35606963	35611998	-	5036	1956	LAST	1	chr1	35606963	35608634	1672	354	21.1722	18.0982	97.137	3	SPL	HERV3-int	LTR/ERV1	chr1	35608281	35609365	-	20.41	LineageSpe
XLOC_000782	linc-ZMYM6-1	TCONS_00002334	lincRNA	chr1	35607057	35611998	-	4942	1677	FIRST	2	chr1	35611900	35611998	99	99	100	5.9034	96.6607	3	TSS_SPL	HERV3-int	LTR/ERV1	chr1	35610357	35612165	-	20.41	LineageSpe
XLOC_000782	linc-ZMYM6-1	TCONS_00002334	lincRNA	chr1	35607057	35611998	-	4942	1677	LAST	1	chr1	35607057	35608634	1578	709	44.9303	42.2779	96.6607	3	exonized	HERV3-int	LTR/ERV1	chr1	35607516	35608224	-	20.41	LineageSpe
XLOC_000782	linc-ZMYM6-1	TCONS_00002334	lincRNA	chr1	35607057	35611998	-	4942	1677	LAST	1	chr1	35607057	35608634	1578	459	29.0875	27.3703	96.6607	3	PolyA	LTR2C	LTR/ERV1	chr1	35607028	35607515	-	11.18	LineageSpe
XLOC_000782	linc-ZMYM6-1	TCONS_00002334	lincRNA	chr1	35607057	35611998	-	4942	1677	LAST	1	chr1	35607057	35608634	1578	354	22.4335	21.1091	96.6607	3	SPL	HERV3-int	LTR/ERV1	chr1	35608281	35609365	-	20.41	LineageSpe
XLOC_000783	linc-PSMB2-1	TCONS_00001454	lincRNA	chr1	36127392	36130797	-	3406	281	FIRST	2	chr1	36130734	36130797	64	48	75	17.0819	46.6192	1	SPL	HAL1	LINE/L1	chr1	36130591	36130781	-	27.91	Ancient
XLOC_000783	linc-PSMB2-1	TCONS_00001454	lincRNA	chr1	36127392	36130797	-	3406	281	LAST	1	chr1	36127392	36127608	217	83	38.2488	29.5374	46.6192	1	PolyA	MIRc	SINE/MIR	chr1	36127347	36127474	+	29.57	Ancient
XLOC_000787	linc-GRIK3-2	TCONS_00000504	lincRNA	chr1	37920480	37940012	-	19533	1395	MIDDLE	2	chr1	37921968	37922060	93	93	100	6.66667	14.0502	3	Both_SPL	AluJb	SINE/Alu	chr1	37921947	37922246	+	16.49	LineageSpe
XLOC_000787	linc-GRIK3-2	TCONS_00000504	lincRNA	chr1	37920480	37940012	-	19533	1395	LAST	1	chr1	37920480	37921513	1034	103	9.96132	7.38351	14.0502	3	exonized	MIR	SINE/MIR	chr1	37920916	37921018	-	27.84	Ancient
XLOC_000787	linc-GRIK3-2	TCONS_00001457	lincRNA	chr1	37920515	37939918	-	19404	1173	LAST	1	chr1	37920515	37921513	999	103	10.3103	8.7809	8.7809	3	exonized	MIR	SINE/MIR	chr1	37920916	37921018	-	27.84	Ancient
XLOC_000787	linc-GRIK3-2	TCONS_00002336	lincRNA	chr1	37920492	37922049	-	1558	1104	FIRST	2	chr1	37921968	37922049	82	82	100	7.42754	16.7572	3	TSS_SPL	AluJb	SINE/Alu	chr1	37921947	37922246	+	16.49	LineageSpe
XLOC_000787	linc-GRIK3-2	TCONS_00002336	lincRNA	chr1	37920492	37922049	-	1558	1104	LAST	1	chr1	37920492	37921513	1022	103	10.0783	9.32971	16.7572	3	exonized	MIR	SINE/MIR	chr1	37920916	37921018	-	27.84	Ancient
XLOC_000788	linc-POU3F1-2	TCONS_00000505	lincRNA	chr1	38674706	38680439	-	5734	2283	FIRST	4	chr1	38680389	38680439	51	51	100	2.2339	48.1822	3	TSS_SPL	MIR3	SINE/MIR	chr1	38680277	38680455	+	29.77	Ancient
XLOC_000788	linc-POU3F1-2	TCONS_00000505	lincRNA	chr1	38674706	38680439	-	5734	2283	MIDDLE	2	chr1	38677406	38677494	89	89	100	3.89838	48.1822	3	Both_SPL	L2a	LINE/L2	chr1	38676855	38677948	+	29.37	Ancient
XLOC_000788	linc-POU3F1-2	TCONS_00000505	lincRNA	chr1	38674706	38680439	-	5734	2283	LAST	1	chr1	38674706	38676494	1789	66	3.68921	2.89093	48.1822	3	exonized	MIR	SINE/MIR	chr1	38674976	38675041	-	27.84	Ancient
XLOC_000788	linc-POU3F1-2	TCONS_00000505	lincRNA	chr1	38674706	38680439	-	5734	2283	LAST	1	chr1	38674706	38676494	1789	156	8.71996	6.83311	48.1822	3	exonized	MIR3	SINE/MIR	chr1	38675607	38675762	-	29.77	Ancient
XLOC_000788	linc-POU3F1-2	TCONS_00000505	lincRNA	chr1	38674706	38680439	-	5734	2283	MIDDLE	3	chr1	38677770	38678123	354	179	50.565	7.84056	48.1822	3	SPL	L2a	LINE/L2	chr1	38676855	38677948	+	29.37	Ancient
XLOC_000788	linc-POU3F1-2	TCONS_00000505	lincRNA	chr1	38674706	38680439	-	5734	2283	MIDDLE	3	chr1	38677770	38678123	354	54	15.2542	2.36531	48.1822	3	SPL	L2c	LINE/L2	chr1	38678070	38678283	-	32.46	Ancient
XLOC_000788	linc-POU3F1-2	TCONS_00000505	lincRNA	chr1	38674706	38680439	-	5734	2283	LAST	1	chr1	38674706	38676494	1789	137	7.65791	6.00088	48.1822	3	exonized	MIRc	SINE/MIR	chr1	38675345	38675481	-	29.57	Ancient
XLOC_000788	linc-POU3F1-2	TCONS_00000505	lincRNA	chr1	38674706	38680439	-	5734	2283	LAST	1	chr1	38674706	38676494	1789	100	5.58971	4.3802	48.1822	3	SPL	MIRb	SINE/MIR	chr1	38676395	38676607	+	29.76	Ancient
XLOC_000788	linc-POU3F1-2	TCONS_00000505	lincRNA	chr1	38674706	38680439	-	5734	2283	LAST	1	chr1	38674706	38676494	1789	79	4.41587	3.46036	48.1822	3	PolyA	MER58A	DNA/hAT-Charlie	chr1	38674561	38674784	-	22.89	Ancient
XLOC_000788	linc-POU3F1-2	TCONS_00000505	lincRNA	chr1	38674706	38680439	-	5734	2283	LAST	1	chr1	38674706	38676494	1789	189	10.5646	8.27858	48.1822	3	exonized	LTR16C	LTR/ERVL	chr1	38674785	38674973	+	28.16	Ancient
XLOC_000788	linc-POU3F1-2	TCONS_00001458	lincRNA	chr1	38676827	38678548	-	1722	1447	FIRST	2	chr1	38677770	38678548	779	179	22.9782	12.3704	71.3891	3	SPL	L2a	LINE/L2	chr1	38676855	38677948	+	29.37	Ancient
XLOC_000788	linc-POU3F1-2	TCONS_00001458	lincRNA	chr1	38676827	38678548	-	1722	1447	FIRST	2	chr1	38677770	38678548	779	214	27.4711	14.7892	71.3891	3	exonized	L2c	LINE/L2	chr1	38678070	38678283	-	32.46	Ancient
XLOC_000788	linc-POU3F1-2	TCONS_00001458	lincRNA	chr1	38676827	38678548	-	1722	1447	LAST	1	chr1	38676827	38677494	668	640	95.8084	44.2294	71.3891	3	SPL	L2a	LINE/L2	chr1	38676855	38677948	+	29.37	Ancient
XLOC_000788	linc-POU3F1-2	TCONS_00001459	lincRNA	chr1	38677503	38678429	-	927	575	LAST	1	chr1	38677503	38678044	542	446	82.2878	77.5652	77.5652	3	PolyA	L2a	LINE/L2	chr1	38676855	38677948	+	29.37	Ancient
XLOC_000789	linc-POU3F1-1	TCONS_00001460	lincRNA	chr1	38765781	38777050	-	11270	455	FIRST	2	chr1	38776925	38777050	126	126	100	27.6923	89.6703	1	TSS_SPL	MLT2B4	LTR/ERVL	chr1	38776856	38777402	-	19.1	Ancient
XLOC_000789	linc-POU3F1-1	TCONS_00001460	lincRNA	chr1	38765781	38777050	-	11270	455	LAST	1	chr1	38765781	38766109	329	282	85.7143	61.978	89.6703	1	SPL	L1ME4a	LINE/L1	chr1	38765828	38766338	+	27.76	Ancient
XLOC_000794	linc-PPT1-1	TCONS_00001468	lincRNA	chr1	40623424	40626915	-	3492	251	FIRST	2	chr1	40626759	40626915	157	46	29.2994	18.3267	54.1833	1	SPL	L2b	LINE/L2	chr1	40626684	40626804	+	32.38	Ancient
XLOC_000794	linc-PPT1-1	TCONS_00001468	lincRNA	chr1	40623424	40626915	-	3492	251	LAST	1	chr1	40623424	40623517	94	90	95.7447	35.8566	54.1833	1	PolyA	L2a	LINE/L2	chr1	40622950	40623513	+	29.37	Ancient
XLOC_000796	linc-COL9A2-2	TCONS_00000506	lincRNA	chr1	40932412	40938148	-	5737	2382	FIRST	2	chr1	40936182	40938148	1967	50	2.54194	2.09908	74.4752	1	exonized	L1MB2	LINE/L1	chr1	40937291	40937340	+	18.49	Ancient
XLOC_000796	linc-COL9A2-2	TCONS_00000506	lincRNA	chr1	40932412	40938148	-	5737	2382	FIRST	2	chr1	40936182	40938148	1967	223	11.3371	9.36188	74.4752	1	exonized	L1MB2	LINE/L1	chr1	40936766	40936988	+	18.49	Ancient
XLOC_000796	linc-COL9A2-2	TCONS_00000506	lincRNA	chr1	40932412	40938148	-	5737	2382	FIRST	2	chr1	40936182	40938148	1967	302	15.3533	12.6784	74.4752	1	exonized	AluSq	SINE/Alu	chr1	40936989	40937290	+	10.52	LineageSpe
XLOC_000796	linc-COL9A2-2	TCONS_00000506	lincRNA	chr1	40932412	40938148	-	5737	2382	FIRST	2	chr1	40936182	40938148	1967	51	2.59278	2.14106	74.4752	1	SPL	AluSq2	SINE/Alu	chr1	40935929	40936232	-	10.62	LineageSpe
XLOC_000796	linc-COL9A2-2	TCONS_00000506	lincRNA	chr1	40932412	40938148	-	5737	2382	LAST	1	chr1	40932412	40932826	415	245	59.0361	10.2855	74.4752	1	SPL	AluJb	SINE/Alu	chr1	40932582	40932877	-	16.49	LineageSpe
XLOC_000796	linc-COL9A2-2	TCONS_00000506	lincRNA	chr1	40932412	40938148	-	5737	2382	FIRST	2	chr1	40936182	40938148	1967	730	37.1124	30.6465	74.4752	1	TSS	LTR5A	LTR/ERVK	chr1	40937419	40938429	+	7.51	LineageSpe
XLOC_000796	linc-COL9A2-2	TCONS_00000506	lincRNA	chr1	40932412	40938148	-	5737	2382	FIRST	2	chr1	40936182	40938148	1967	173	8.79512	7.2628	74.4752	1	exonized	MIR	SINE/MIR	chr1	40936435	40936607	+	27.84	Ancient
XLOC_000801	linc-CITED4-1	TCONS_00001475	lincRNA	chr1	41430713	41432244	-	1532	1005	FIRST	2	chr1	41431275	41432244	970	418	43.0928	41.592	58.7065	1	TSS	LTR33C	LTR/ERVL	chr1	41431827	41432336	+	27.36	Ancient
XLOC_000801	linc-CITED4-1	TCONS_00001475	lincRNA	chr1	41430713	41432244	-	1532	1005	FIRST	2	chr1	41431275	41432244	970	172	17.732	17.1144	58.7065	1	exonized	MLT1J	LTR/ERVL-MaLR	chr1	41431633	41431804	-	28.52	Ancient
XLOC_000808	linc-C1orf210-1	TCONS_00000509	lincRNA	chr1	43820355	43824329	-	3975	661	MIDDLE	2	chr1	43823474	43823571	98	98	100	14.826	62.6324	3	Both_SPL	AluY	SINE/Alu	chr1	43823277	43823572	-	6.92	LineageSpe
XLOC_000808	linc-C1orf210-1	TCONS_00000509	lincRNA	chr1	43820355	43824329	-	3975	661	LAST	1	chr1	43820355	43820677	323	316	97.8328	47.8064	62.6324	3	PolyA	LTR33	LTR/ERVL	chr1	43820312	43820670	-	29.01	Ancient
XLOC_000808	linc-C1orf210-1	TCONS_00002363	lincRNA	chr1	43820357	43823559	-	3203	407	FIRST	2	chr1	43823474	43823559	86	86	100	21.1302	98.2801	3	TSS_SPL	AluY	SINE/Alu	chr1	43823277	43823572	-	6.92	LineageSpe
XLOC_000808	linc-C1orf210-1	TCONS_00002363	lincRNA	chr1	43820357	43823559	-	3203	407	LAST	1	chr1	43820357	43820677	321	314	97.8193	77.1499	98.2801	3	PolyA	LTR33	LTR/ERVL	chr1	43820312	43820670	-	29.01	Ancient
XLOC_000808	linc-C1orf210-1	TCONS_00002364	lincRNA	chr1	43823628	43824390	-	763	322	LAST	1	chr1	43823628	43823779	152	95	62.5	29.5031	29.5031	3	SPL	MIRc	SINE/MIR	chr1	43823685	43823794	+	29.57	Ancient
XLOC_000811	linc-HYI-1	TCONS_00002373	lincRNA	chr1	44404330	44406129	-	1800	364	FIRST	2	chr1	44405902	44406129	228	58	25.4386	15.9341	58.7912	1	SPL	L2	LINE/L2	chr1	44405684	44405959	+	32.38	Ancient
XLOC_000811	linc-HYI-1	TCONS_00002373	lincRNA	chr1	44404330	44406129	-	1800	364	FIRST	2	chr1	44405902	44406129	228	42	18.4211	11.5385	58.7912	1	TSS	MER53	DNA/hAT	chr1	44406088	44406135	-	17.48	Ancient
XLOC_000811	linc-HYI-1	TCONS_00002373	lincRNA	chr1	44404330	44406129	-	1800	364	FIRST	2	chr1	44405902	44406129	228	114	50	31.3187	58.7912	1	exonized	L2c	LINE/L2	chr1	44405974	44406087	-	32.46	Ancient
XLOC_000812	linc-HYI-2	TCONS_00000510	lincRNA	chr1	44410042	44411974	-	1933	486	LAST	1	chr1	44410042	44410468	427	47	11.007	9.67078	9.67078	3	PolyA	L1MEd	LINE/L1	chr1	44409963	44410088	+	28.83	Ancient
XLOC_000812	linc-HYI-2	TCONS_00000511	lincRNA	chr1	44410044	44411958	-	1915	294	LAST	1	chr1	44410044	44410146	103	45	43.6893	15.3061	15.3061	3	PolyA	L1MEd	LINE/L1	chr1	44409963	44410088	+	28.83	Ancient
XLOC_000812	linc-HYI-2	TCONS_00000512	lincRNA	chr1	44410046	44412223	-	2178	494	LAST	1	chr1	44410046	44410468	423	43	10.1655	8.70445	8.70445	3	PolyA	L1MEd	LINE/L1	chr1	44409963	44410088	+	28.83	Ancient
XLOC_000818	linc-LRRC41-2	TCONS_00000514	lincRNA	chr1	46912345	46915376	-	3032	1129	MIDDLE	2	chr1	46913124	46913561	438	81	18.4932	7.17449	7.17449	1	exonized	MIRc	SINE/MIR	chr1	46913299	46913379	+	29.57	Ancient
XLOC_000819	linc-CYP4A11-1	TCONS_00001483	lincRNA	chr1	47638527	47640990	-	2464	947	FIRST	2	chr1	47640226	47640990	765	87	11.3725	9.18691	31.8902	1	SPL	L1M5	LINE/L1	chr1	47640157	47640312	+	28.23	Ancient
XLOC_000819	linc-CYP4A11-1	TCONS_00001483	lincRNA	chr1	47638527	47640990	-	2464	947	LAST	1	chr1	47638527	47638708	182	24	13.1868	2.53432	31.8902	1	SPL	MLT1A0	LTR/ERVL-MaLR	chr1	47638685	47638977	-	19.59	Ancient
XLOC_000819	linc-CYP4A11-1	TCONS_00001483	lincRNA	chr1	47638527	47640990	-	2464	947	LAST	1	chr1	47638527	47638708	182	60	32.967	6.3358	31.8902	1	PolyA	MLT1A0	LTR/ERVL-MaLR	chr1	47638449	47638586	-	19.59	Ancient
XLOC_000819	linc-CYP4A11-1	TCONS_00001483	lincRNA	chr1	47638527	47640990	-	2464	947	LAST	1	chr1	47638527	47638708	182	79	43.4066	8.34213	31.8902	1	exonized	MLT1A0	LTR/ERVL-MaLR	chr1	47638597	47638675	-	19.59	Ancient
XLOC_000819	linc-CYP4A11-1	TCONS_00001483	lincRNA	chr1	47638527	47640990	-	2464	947	FIRST	2	chr1	47640226	47640990	765	52	6.79739	5.49102	31.8902	1	TSS	L2b	LINE/L2	chr1	47640939	47641005	-	32.38	Ancient
XLOC_000820	linc-CYP4A11-2	TCONS_00000515	lincRNA	chr1	47643841	47644943	-	1103	363	LAST	1	chr1	47643841	47644121	281	141	50.1779	38.843	38.843	1	exonized	MIR3	SINE/MIR	chr1	47643962	47644102	+	29.77	Ancient
XLOC_000822	linc-STIL-2	TCONS_00000516	lincRNA	chr1	47846600	47874149	-	27550	483	FIRST	3	chr1	47873992	47874149	158	43	27.2152	8.90269	15.1139	3	TSS	L2c	LINE/L2	chr1	47874107	47874184	-	32.46	Ancient
XLOC_000822	linc-STIL-2	TCONS_00000516	lincRNA	chr1	47846600	47874149	-	27550	483	MIDDLE	2	chr1	47851920	47852028	109	30	27.5229	6.21118	15.1139	3	SPL	L1PA16	LINE/L1	chr1	47851999	47852464	+	14.52	LineageSpe
XLOC_000822	linc-STIL-2	TCONS_00001484	lincRNA	chr1	47846387	47852536	-	6150	1046	LAST	1	chr1	47846387	47846815	429	12	2.7972	1.14723	50.5736	3	PolyA	AluY	SINE/Alu	chr1	47846088	47846398	-	6.92	LineageSpe
XLOC_000822	linc-STIL-2	TCONS_00001484	lincRNA	chr1	47846387	47852536	-	6150	1046	FIRST	2	chr1	47851920	47852536	617	466	75.5267	44.5507	50.5736	3	exonized	L1PA16	LINE/L1	chr1	47851999	47852464	+	14.52	LineageSpe
XLOC_000822	linc-STIL-2	TCONS_00001484	lincRNA	chr1	47846387	47852536	-	6150	1046	FIRST	2	chr1	47851920	47852536	617	51	8.2658	4.87572	50.5736	3	exonized	L2c	LINE/L2	chr1	47852472	47852522	+	32.46	Ancient
XLOC_000822	linc-STIL-2	TCONS_00001485	lincRNA	chr1	47873217	47874257	-	1041	281	FIRST	2	chr1	47873992	47874257	266	78	29.3233	27.758	33.0961	3	exonized	L2c	LINE/L2	chr1	47874107	47874184	-	32.46	Ancient
XLOC_000822	linc-STIL-2	TCONS_00001485	lincRNA	chr1	47873217	47874257	-	1041	281	LAST	1	chr1	47873217	47873231	15	15	100	5.33808	33.0961	3	PolyA_SPL	L1ME4a	LINE/L1	chr1	47872870	47873263	-	27.76	Ancient
XLOC_000824	linc-STIL-4	TCONS_00001488	lincRNA	chr1	47971932	47973315	-	1384	355	FIRST	2	chr1	47973268	47973315	48	11	22.9167	3.09859	41.1268	1	SPL	MIRb	SINE/MIR	chr1	47973241	47973278	-	29.76	Ancient
XLOC_000824	linc-STIL-4	TCONS_00001488	lincRNA	chr1	47971932	47973315	-	1384	355	LAST	1	chr1	47971932	47972238	307	82	26.7101	23.0986	41.1268	1	PolyA	L2a	LINE/L2	chr1	47971891	47972013	-	29.37	Ancient
XLOC_000824	linc-STIL-4	TCONS_00001488	lincRNA	chr1	47971932	47973315	-	1384	355	LAST	1	chr1	47971932	47972238	307	53	17.2638	14.9296	41.1268	1	SPL	MIR3	SINE/MIR	chr1	47972186	47972306	-	29.77	Ancient
XLOC_000826	linc-LOC388630-1	TCONS_00000518	lincRNA	chr1	48544459	48547868	-	3410	292	LAST	1	chr1	48544459	48544696	238	176	73.9496	60.274	60.274	1	exonized	MIR3	SINE/MIR	chr1	48544515	48544690	-	29.77	Ancient
XLOC_000828	linc-LOC388630-3	TCONS_00001489	lincRNA	chr1	48727015	48730430	-	3416	342	FIRST	2	chr1	48730415	48730430	16	16	100	4.67836	4.67836	1	TSS_SPL	L1PA7	LINE/L1	chr1	48730045	48730640	-	8.75	LineageSpe
XLOC_000830	linc-AGBL4-3	TCONS_00001490	lincRNA	chr1	50717182	50723876	-	6695	339	MIDDLE	2	chr1	50719509	50719639	131	64	48.855	18.8791	27.7286	2	SPL	MIRb	SINE/MIR	chr1	50719576	50719711	+	29.76	Ancient
XLOC_000830	linc-AGBL4-3	TCONS_00001490	lincRNA	chr1	50717182	50723876	-	6695	339	LAST	1	chr1	50717182	50717212	31	30	96.7742	8.84956	27.7286	2	PolyA	MIRc	SINE/MIR	chr1	50717141	50717211	-	29.57	Ancient
XLOC_000830	linc-AGBL4-3	TCONS_00002380	lincRNA	chr1	50719577	50723876	-	4300	240	LAST	1	chr1	50719577	50719639	63	63	100	26.25	26.25	2	PolyA_SPL	MIRb	SINE/MIR	chr1	50719576	50719711	+	29.76	Ancient
XLOC_000831	linc-AGBL4-2	TCONS_00001491	lincRNA	chr1	50731521	50745851	-	14331	886	FIRST	2	chr1	50745707	50745851	145	36	24.8276	4.06321	35.2144	1	SPL	L2b	LINE/L2	chr1	50745386	50745742	+	32.38	Ancient
XLOC_000831	linc-AGBL4-2	TCONS_00001491	lincRNA	chr1	50731521	50745851	-	14331	886	LAST	1	chr1	50731521	50732261	741	276	37.247	31.1512	35.2144	1	exonized	MIRc	SINE/MIR	chr1	50731728	50732003	+	29.57	Ancient
XLOC_000832	linc-AGBL4-1	TCONS_00001492	lincRNA	chr1	50782665	50786783	-	4119	886	LAST	1	chr1	50782665	50783330	666	29	4.35435	3.27314	41.8736	3	PolyA	L2a	LINE/L2	chr1	50782618	50782693	+	29.37	Ancient
XLOC_000832	linc-AGBL4-1	TCONS_00001492	lincRNA	chr1	50782665	50786783	-	4119	886	FIRST	3	chr1	50786689	50786783	95	95	100	10.7223	41.8736	3	TSS_SPL	MIR	SINE/MIR	chr1	50786624	50786866	-	27.84	Ancient
XLOC_000832	linc-AGBL4-1	TCONS_00001492	lincRNA	chr1	50782665	50786783	-	4119	886	MIDDLE	2	chr1	50783954	50784078	125	51	40.8	5.75621	41.8736	3	SPL	MIRb	SINE/MIR	chr1	50784028	50784112	+	29.76	Ancient
XLOC_000832	linc-AGBL4-1	TCONS_00001492	lincRNA	chr1	50782665	50786783	-	4119	886	LAST	1	chr1	50782665	50783330	666	122	18.3183	13.7698	41.8736	3	exonized	MIRc	SINE/MIR	chr1	50782883	50783004	-	29.57	Ancient
XLOC_000832	linc-AGBL4-1	TCONS_00001492	lincRNA	chr1	50782665	50786783	-	4119	886	MIDDLE	2	chr1	50783954	50784078	125	74	59.2	8.35214	41.8736	3	SPL	MIRb	SINE/MIR	chr1	50783792	50784027	-	29.76	Ancient
XLOC_000832	linc-AGBL4-1	TCONS_00001493	lincRNA	chr1	50782783	50786833	-	4051	693	FIRST	2	chr1	50786689	50786833	145	145	100	20.9235	38.5281	3	TSS_SPL	MIR	SINE/MIR	chr1	50786624	50786866	-	27.84	Ancient
XLOC_000832	linc-AGBL4-1	TCONS_00001493	lincRNA	chr1	50782783	50786833	-	4051	693	LAST	1	chr1	50782783	50783330	548	122	22.2628	17.6046	38.5281	3	exonized	MIRc	SINE/MIR	chr1	50782883	50783004	-	29.57	Ancient
XLOC_000832	linc-AGBL4-1	TCONS_00002381	lincRNA	chr1	50782771	50786783	-	4013	810	FIRST	3	chr1	50786689	50786783	95	95	100	11.7284	45.9259	3	TSS_SPL	MIR	SINE/MIR	chr1	50786624	50786866	-	27.84	Ancient
XLOC_000832	linc-AGBL4-1	TCONS_00002381	lincRNA	chr1	50782771	50786783	-	4013	810	MIDDLE	2	chr1	50783954	50784108	155	81	52.2581	10	45.9259	3	SPL	MIRb	SINE/MIR	chr1	50784028	50784112	+	29.76	Ancient
XLOC_000832	linc-AGBL4-1	TCONS_00002381	lincRNA	chr1	50782771	50786783	-	4013	810	MIDDLE	2	chr1	50783954	50784108	155	74	47.7419	9.1358	45.9259	3	SPL	MIRb	SINE/MIR	chr1	50783792	50784027	-	29.76	Ancient
XLOC_000832	linc-AGBL4-1	TCONS_00002381	lincRNA	chr1	50782771	50786783	-	4013	810	LAST	1	chr1	50782771	50783330	560	122	21.7857	15.0617	45.9259	3	exonized	MIRc	SINE/MIR	chr1	50782883	50783004	-	29.57	Ancient
XLOC_000835	linc-LRP8-3	TCONS_00001496	lincRNA	chr1	53798053	53812604	-	14552	1007	MIDDLE	2	chr1	53806398	53806445	48	48	100	4.76663	49.7517	2	Both_SPL	MIR	SINE/MIR	chr1	53806357	53806544	+	27.84	Ancient
XLOC_000835	linc-LRP8-3	TCONS_00001496	lincRNA	chr1	53798053	53812604	-	14552	1007	LAST	1	chr1	53798053	53798846	794	121	15.2393	12.0159	49.7517	2	exonized	MIR	SINE/MIR	chr1	53798394	53798514	+	27.84	Ancient
XLOC_000835	linc-LRP8-3	TCONS_00001496	lincRNA	chr1	53798053	53812604	-	14552	1007	LAST	1	chr1	53798053	53798846	794	332	41.8136	32.9692	49.7517	2	SPL	MLT1F	LTR/ERVL-MaLR	chr1	53798515	53799047	-	23.58	Ancient
XLOC_000835	linc-LRP8-3	TCONS_00002383	lincRNA	chr1	53798548	53806483	-	7936	385	FIRST	2	chr1	53806398	53806483	86	86	100	22.3377	100	2	TSS_SPL	MIR	SINE/MIR	chr1	53806357	53806544	+	27.84	Ancient
XLOC_000835	linc-LRP8-3	TCONS_00002383	lincRNA	chr1	53798548	53806483	-	7936	385	LAST	1	chr1	53798548	53798846	299	299	100	77.6623	100	2	PolyA_SPL	MLT1F	LTR/ERVL-MaLR	chr1	53798515	53799047	-	23.58	Ancient
XLOC_000836	linc-LRP8-2	TCONS_00000522	lincRNA	chr1	53814160	53814905	-	746	383	FIRST	2	chr1	53814666	53814905	240	47	19.5833	12.2715	48.8251	1	SPL	LTR33	LTR/ERVL	chr1	53814421	53814712	-	29.01	Ancient
XLOC_000836	linc-LRP8-2	TCONS_00000522	lincRNA	chr1	53814160	53814905	-	746	383	FIRST	2	chr1	53814666	53814905	240	140	58.3333	36.5535	48.8251	1	exonized	MIRc	SINE/MIR	chr1	53814761	53814900	+	29.57	Ancient
XLOC_000837	linc-LRP8-1	TCONS_00000523	lincRNA	chr1	53832340	53833917	-	1578	850	FIRST	2	chr1	53833678	53833917	240	32	13.3333	3.76471	51.4118	1	TSS	MIRc	SINE/MIR	chr1	53833886	53833973	+	29.57	Ancient
XLOC_000837	linc-LRP8-1	TCONS_00000523	lincRNA	chr1	53832340	53833917	-	1578	850	LAST	1	chr1	53832340	53832949	610	137	22.459	16.1176	51.4118	1	PolyA	AluJr	SINE/Alu	chr1	53832154	53832476	-	16.75	LineageSpe
XLOC_000837	linc-LRP8-1	TCONS_00000523	lincRNA	chr1	53832340	53833917	-	1578	850	LAST	1	chr1	53832340	53832949	610	78	12.7869	9.17647	51.4118	1	SPL	LTR16A	LTR/ERVL	chr1	53832872	53833116	-	28.44	Ancient
XLOC_000837	linc-LRP8-1	TCONS_00000523	lincRNA	chr1	53832340	53833917	-	1578	850	LAST	1	chr1	53832340	53832949	610	190	31.1475	22.3529	51.4118	1	exonized	MLT1D	LTR/ERVL-MaLR	chr1	53832477	53832666	-	21.73	Ancient
XLOC_000839	linc-YIPF1-1	TCONS_00001498	lincRNA	chr1	54377676	54378843	-	1168	650	FIRST	2	chr1	54378810	54378843	34	34	100	5.23077	50.1538	1	TSS_SPL	LTR16A1	LTR/ERVL	chr1	54378634	54379090	+	26.34	Ancient
XLOC_000839	linc-YIPF1-1	TCONS_00001498	lincRNA	chr1	54377676	54378843	-	1168	650	LAST	1	chr1	54377676	54378291	616	292	47.4026	44.9231	50.1538	1	SPL	L2c	LINE/L2	chr1	54378000	54378390	-	32.46	Ancient
XLOC_000840	linc-SSBP3-1	TCONS_00000524	lincRNA	chr1	54878381	54879139	-	759	454	FIRST	3	chr1	54879029	54879139	111	109	98.1982	24.0088	88.5463	1	SPL	MLT1J2	LTR/ERVL-MaLR	chr1	54878937	54879137	-	28.4	Ancient
XLOC_000840	linc-SSBP3-1	TCONS_00000524	lincRNA	chr1	54878381	54879139	-	759	454	LAST	1	chr1	54878381	54878550	170	15	8.82353	3.30396	88.5463	1	PolyA	L1MB3	LINE/L1	chr1	54878038	54878395	+	17.82	Ancient
XLOC_000840	linc-SSBP3-1	TCONS_00000524	lincRNA	chr1	54878381	54879139	-	759	454	MIDDLE	2	chr1	54878754	54878926	173	124	71.6763	27.3128	88.5463	1	SPL	L2a	LINE/L2	chr1	54878803	54878935	+	29.37	Ancient
XLOC_000840	linc-SSBP3-1	TCONS_00000524	lincRNA	chr1	54878381	54879139	-	759	454	LAST	1	chr1	54878381	54878550	170	154	90.5882	33.9207	88.5463	1	SPL	AluSg	SINE/Alu	chr1	54878397	54878686	-	10.37	LineageSpe
XLOC_000841	linc-SSBP3-2	TCONS_00000525	lincRNA	chr1	54982085	54982932	-	848	683	FIRST	2	chr1	54982877	54982932	56	56	100	8.19912	8.19912	1	TSS_SPL	MIRb	SINE/MIR	chr1	54982864	54983047	+	29.76	Ancient
XLOC_000842	linc-USP24-3	TCONS_00001499	lincRNA	chr1	56522357	56526505	-	4149	574	FIRST	2	chr1	56526365	56526505	141	57	40.4255	9.93031	83.101	1	SPL	MIRb	SINE/MIR	chr1	56526241	56526421	-	29.76	Ancient
XLOC_000842	linc-USP24-3	TCONS_00001499	lincRNA	chr1	56522357	56526505	-	4149	574	LAST	1	chr1	56522357	56522789	433	223	51.5012	38.8502	83.101	1	PolyA	Charlie19a	DNA/hAT-Charlie	chr1	56522341	56522579	+	27.38	Ancient
XLOC_000842	linc-USP24-3	TCONS_00001499	lincRNA	chr1	56522357	56526505	-	4149	574	LAST	1	chr1	56522357	56522789	433	197	45.4965	34.3206	83.101	1	SPL	MLT1I	LTR/ERVL-MaLR	chr1	56522593	56522975	-	29.11	Ancient
XLOC_000843	linc-USP24-4	TCONS_00001500	lincRNA	chr1	56620356	56621430	-	1075	412	LAST	1	chr1	56620356	56620727	372	372	100	90.2913	90.2913	1	PolyA_SPL	LTR33	LTR/ERVL	chr1	56620277	56620756	-	29.01	Ancient
XLOC_000844	linc-USP24-1	TCONS_00001501	lincRNA	chr1	56701944	56714875	-	12932	337	FIRST	2	chr1	56714702	56714875	174	109	62.6437	32.3442	32.3442	2	SPL	L1M4	LINE/L1	chr1	56714093	56714810	+	21.84	Ancient
XLOC_000844	linc-USP24-1	TCONS_00001502	lincRNA	chr1	56714582	56719436	-	4855	403	FIRST	2	chr1	56719325	56719436	112	112	100	27.7916	84.6154	2	TSS_SPL	L2c	LINE/L2	chr1	56719228	56719446	+	32.46	Ancient
XLOC_000844	linc-USP24-1	TCONS_00001502	lincRNA	chr1	56714582	56719436	-	4855	403	LAST	1	chr1	56714582	56714872	291	229	78.6942	56.8238	84.6154	2	PolyA	L1M4	LINE/L1	chr1	56714093	56714810	+	21.84	Ancient
XLOC_000846	linc-PPAP2B-1	TCONS_00001504	lincRNA	chr1	57093429	57110930	-	17502	464	LAST	1	chr1	57093429	57093727	299	233	77.9264	50.2155	50.2155	3	PolyA	MLT1I	LTR/ERVL-MaLR	chr1	57093374	57093661	-	29.11	Ancient
XLOC_000846	linc-PPAP2B-1	TCONS_00002384	lincRNA	chr1	57093429	57109907	-	16479	443	LAST	1	chr1	57093429	57093727	299	233	77.9264	52.5959	52.5959	3	PolyA	MLT1I	LTR/ERVL-MaLR	chr1	57093374	57093661	-	29.11	Ancient
XLOC_000847	linc-C1orf168-1	TCONS_00000080	lincRNA	chr1	57289361	57292593	-	3233	1815	FIRST	2	chr1	57292238	57292593	356	66	18.5393	3.63636	31.6253	1	SPL	L2c	LINE/L2	chr1	57291947	57292303	+	32.46	Ancient
XLOC_000847	linc-C1orf168-1	TCONS_00000080	lincRNA	chr1	57289361	57292593	-	3233	1815	LAST	1	chr1	57289361	57290819	1459	65	4.45511	3.58127	31.6253	1	exonized	L2b	LINE/L2	chr1	57289366	57289430	-	32.38	Ancient
XLOC_000847	linc-C1orf168-1	TCONS_00000080	lincRNA	chr1	57289361	57292593	-	3233	1815	LAST	1	chr1	57289361	57290819	1459	306	20.9733	16.8595	31.6253	1	exonized	MLT1A1	LTR/ERVL-MaLR	chr1	57289820	57290125	-	19.28	Ancient
XLOC_000847	linc-C1orf168-1	TCONS_00000080	lincRNA	chr1	57289361	57292593	-	3233	1815	LAST	1	chr1	57289361	57290819	1459	137	9.38999	7.54821	31.6253	1	exonized	MamRep564	Unknown	chr1	57290134	57290270	-	26.47	Ancient
XLOC_000849	linc-JUN-5	TCONS_00000527	lincRNA	chr1	59521671	59543788	-	22118	317	FIRST	3	chr1	59543704	59543788	85	63	74.1176	19.8738	19.8738	1	TSS	MIR	SINE/MIR	chr1	59543726	59543840	-	27.84	Ancient
XLOC_000850	linc-JUN-2	TCONS_00000528	lincRNA	chr1	59522315	59553867	-	31553	623	FIRST	4	chr1	59553687	59553867	181	135	74.5856	21.6693	50.2408	1	TSS	MIRb	SINE/MIR	chr1	59553733	59553952	+	29.76	Ancient
XLOC_000850	linc-JUN-2	TCONS_00000528	lincRNA	chr1	59522315	59553867	-	31553	623	MIDDLE	3	chr1	59552075	59552268	194	114	58.7629	18.2986	50.2408	1	SPL	MIRb	SINE/MIR	chr1	59551958	59552188	+	29.76	Ancient
XLOC_000850	linc-JUN-2	TCONS_00000528	lincRNA	chr1	59522315	59553867	-	31553	623	MIDDLE	3	chr1	59552075	59552268	194	64	32.9897	10.2729	50.2408	1	SPL	MIR3	SINE/MIR	chr1	59552205	59552327	-	29.77	Ancient
XLOC_000851	linc-JUN-1	TCONS_00000017	lincRNA	chr1	59597610	59612479	-	14870	1041	MIDDLE	2	chr1	59598903	59599002	100	100	100	9.60615	17.6753	3	Both_SPL	L2c	LINE/L2	chr1	59598843	59599003	+	32.46	Ancient
XLOC_000851	linc-JUN-1	TCONS_00000017	lincRNA	chr1	59597610	59612479	-	14870	1041	LAST	1	chr1	59597610	59598418	809	84	10.3832	8.06916	17.6753	3	exonized	MIRc	SINE/MIR	chr1	59597688	59597771	-	29.57	Ancient
XLOC_000851	linc-JUN-1	TCONS_00000529	lincRNA	chr1	59598186	59664293	-	66108	772	FIRST	3	chr1	59663855	59664293	439	73	16.6287	9.45596	22.4093	3	SPL	MIRb	SINE/MIR	chr1	59663804	59663927	-	29.76	Ancient
XLOC_000851	linc-JUN-1	TCONS_00000529	lincRNA	chr1	59598186	59664293	-	66108	772	MIDDLE	2	chr1	59598903	59599002	100	100	100	12.9534	22.4093	3	Both_SPL	L2c	LINE/L2	chr1	59598843	59599003	+	32.46	Ancient
XLOC_000851	linc-JUN-1	TCONS_00002386	lincRNA	chr1	59597609	59612564	-	14956	1102	MIDDLE	2	chr1	59598928	59599002	75	75	100	6.80581	14.4283	3	Both_SPL	L2c	LINE/L2	chr1	59598843	59599003	+	32.46	Ancient
XLOC_000851	linc-JUN-1	TCONS_00002386	lincRNA	chr1	59597609	59612564	-	14956	1102	LAST	1	chr1	59597609	59598418	810	84	10.3704	7.6225	14.4283	3	exonized	MIRc	SINE/MIR	chr1	59597688	59597771	-	29.57	Ancient
XLOC_000852	linc-JUN-3	TCONS_00001507	lincRNA	chr1	59760542	59761578	-	1037	432	FIRST	2	chr1	59761542	59761578	37	28	75.6757	6.48148	86.8056	3	TSS	MIR3	SINE/MIR	chr1	59761551	59761647	+	29.77	Ancient
XLOC_000852	linc-JUN-3	TCONS_00001507	lincRNA	chr1	59760542	59761578	-	1037	432	LAST	1	chr1	59760542	59760936	395	133	33.6709	30.787	86.8056	3	PolyA	MIRc	SINE/MIR	chr1	59760525	59760674	+	29.57	Ancient
XLOC_000852	linc-JUN-3	TCONS_00001507	lincRNA	chr1	59760542	59761578	-	1037	432	LAST	1	chr1	59760542	59760936	395	214	54.1772	49.537	86.8056	3	SPL	MLT1J	LTR/ERVL-MaLR	chr1	59760723	59760946	-	28.52	Ancient
XLOC_000852	linc-JUN-3	TCONS_00001508	lincRNA	chr1	59760717	59762053	-	1337	236	LAST	1	chr1	59760717	59760939	223	217	97.3094	91.9492	91.9492	3	SPL	MLT1J	LTR/ERVL-MaLR	chr1	59760723	59760946	-	28.52	Ancient
XLOC_000852	linc-JUN-3	TCONS_00001509	lincRNA	chr1	59761066	59761673	-	608	503	FIRST	2	chr1	59761542	59761673	132	97	73.4848	19.2843	72.9622	3	exonized	MIR3	SINE/MIR	chr1	59761551	59761647	+	29.77	Ancient
XLOC_000852	linc-JUN-3	TCONS_00001509	lincRNA	chr1	59761066	59761673	-	608	503	LAST	1	chr1	59761066	59761436	371	109	29.3801	21.67	72.9622	3	SPL	MIRb	SINE/MIR	chr1	59761328	59761487	+	29.76	Ancient
XLOC_000852	linc-JUN-3	TCONS_00001509	lincRNA	chr1	59761066	59761673	-	608	503	LAST	1	chr1	59761066	59761436	371	161	43.3962	32.008	72.9622	3	exonized	MIRc	SINE/MIR	chr1	59761128	59761288	-	29.57	Ancient
XLOC_000854	linc-CYP2J2-1	TCONS_00001510	lincRNA	chr1	60429956	60433906	-	3951	666	LAST	1	chr1	60429956	60430323	368	246	66.8478	36.9369	36.9369	1	exonized	MLT1N2	LTR/ERVL-MaLR	chr1	60430060	60430305	-	29.6	Ancient
XLOC_000855	linc-C1orf87-1	TCONS_00000531	lincRNA	chr1	61005921	61106163	-	100243	1796	MIDDLE	6	chr1	61065799	61065922	124	22	17.7419	1.22494	82.1269	2	SPL	MSTA	LTR/ERVL-MaLR	chr1	61065901	61066334	-	14.8	LineageSpe
XLOC_000855	linc-C1orf87-1	TCONS_00000531	lincRNA	chr1	61005921	61106163	-	100243	1796	MIDDLE	6	chr1	61065799	61065922	124	102	82.2581	5.67929	82.1269	2	SPL	MLT1B	LTR/ERVL-MaLR	chr1	61065722	61065900	-	18.85	Ancient
XLOC_000855	linc-C1orf87-1	TCONS_00000531	lincRNA	chr1	61005921	61106163	-	100243	1796	FIRST	8	chr1	61105944	61106163	220	220	100	12.2494	82.1269	2	TSS_SPL	L1PA2	LINE/L1	chr1	61105685	61111709	+	2.29	LineageSpe
XLOC_000855	linc-C1orf87-1	TCONS_00000531	lincRNA	chr1	61005921	61106163	-	100243	1796	MIDDLE	2	chr1	61007969	61008083	115	115	100	6.40312	82.1269	2	Both_SPL	MLT1B	LTR/ERVL-MaLR	chr1	61007894	61008283	-	18.85	Ancient
XLOC_000855	linc-C1orf87-1	TCONS_00000531	lincRNA	chr1	61005921	61106163	-	100243	1796	MIDDLE	7	chr1	61105683	61105798	116	114	98.2759	6.34744	82.1269	2	SPL	L1PA2	LINE/L1	chr1	61105685	61111709	+	2.29	LineageSpe
XLOC_000855	linc-C1orf87-1	TCONS_00000531	lincRNA	chr1	61005921	61106163	-	100243	1796	MIDDLE	5	chr1	61061210	61062045	836	431	51.555	23.9978	82.1269	2	SPL	MLT1D	LTR/ERVL-MaLR	chr1	61061134	61061640	-	21.73	Ancient
XLOC_000855	linc-C1orf87-1	TCONS_00000531	lincRNA	chr1	61005921	61106163	-	100243	1796	MIDDLE	4	chr1	61053709	61053834	126	125	99.2063	6.95991	82.1269	2	SPL	L3	LINE/CR1	chr1	61053710	61054080	+	32.5	Ancient
XLOC_000855	linc-C1orf87-1	TCONS_00000531	lincRNA	chr1	61005921	61106163	-	100243	1796	MIDDLE	5	chr1	61061210	61062045	836	346	41.3876	19.265	82.1269	2	SPL	MLT1F2	LTR/ERVL-MaLR	chr1	61061700	61062284	-	24.38	Ancient
XLOC_000855	linc-C1orf87-1	TCONS_00001511	lincRNA	chr1	61053729	61088212	-	34484	1110	FIRST	4	chr1	61088169	61088212	44	44	100	3.96396	94.6847	2	TSS_SPL	L2c	LINE/L2	chr1	61088138	61088316	+	32.46	Ancient
XLOC_000855	linc-C1orf87-1	TCONS_00001511	lincRNA	chr1	61053729	61088212	-	34484	1110	MIDDLE	3	chr1	61065799	61065922	124	22	17.7419	1.98198	94.6847	2	SPL	MSTA	LTR/ERVL-MaLR	chr1	61065901	61066334	-	14.8	LineageSpe
XLOC_000855	linc-C1orf87-1	TCONS_00001511	lincRNA	chr1	61053729	61088212	-	34484	1110	MIDDLE	3	chr1	61065799	61065922	124	102	82.2581	9.18919	94.6847	2	SPL	MLT1B	LTR/ERVL-MaLR	chr1	61065722	61065900	-	18.85	Ancient
XLOC_000855	linc-C1orf87-1	TCONS_00001511	lincRNA	chr1	61053729	61088212	-	34484	1110	LAST	1	chr1	61053729	61053834	106	106	100	9.54955	94.6847	2	PolyA_SPL	L3	LINE/CR1	chr1	61053710	61054080	+	32.5	Ancient
XLOC_000855	linc-C1orf87-1	TCONS_00001511	lincRNA	chr1	61053729	61088212	-	34484	1110	MIDDLE	2	chr1	61061210	61062045	836	431	51.555	38.8288	94.6847	2	SPL	MLT1D	LTR/ERVL-MaLR	chr1	61061134	61061640	-	21.73	Ancient
XLOC_000855	linc-C1orf87-1	TCONS_00001511	lincRNA	chr1	61053729	61088212	-	34484	1110	MIDDLE	2	chr1	61061210	61062045	836	346	41.3876	31.1712	94.6847	2	SPL	MLT1F2	LTR/ERVL-MaLR	chr1	61061700	61062284	-	24.38	Ancient
XLOC_000856	linc-C1orf87-2	TCONS_00000081	lincRNA	chr1	61125303	61291256	-	165954	2344	LAST	1	chr1	61125303	61127142	1840	116	6.30435	4.94881	37.244	1	SPL	MLT1M	LTR/ERVL-MaLR	chr1	61127027	61127143	+	29.24	Ancient
XLOC_000856	linc-C1orf87-2	TCONS_00000081	lincRNA	chr1	61125303	61291256	-	165954	2344	LAST	1	chr1	61125303	61127142	1840	142	7.71739	6.05802	37.244	1	exonized	MIRb	SINE/MIR	chr1	61126650	61126791	-	29.76	Ancient
XLOC_000856	linc-C1orf87-2	TCONS_00000081	lincRNA	chr1	61125303	61291256	-	165954	2344	LAST	1	chr1	61125303	61127142	1840	306	16.6304	13.0546	37.244	1	exonized	AluSx3	SINE/Alu	chr1	61125524	61125829	+	11.23	LineageSpe
XLOC_000856	linc-C1orf87-2	TCONS_00000081	lincRNA	chr1	61125303	61291256	-	165954	2344	LAST	1	chr1	61125303	61127142	1840	149	8.09783	6.35666	37.244	1	exonized	MIRb	SINE/MIR	chr1	61126488	61126636	-	29.76	Ancient
XLOC_000856	linc-C1orf87-2	TCONS_00000081	lincRNA	chr1	61125303	61291256	-	165954	2344	LAST	1	chr1	61125303	61127142	1840	160	8.69565	6.82594	37.244	1	exonized	L2	LINE/L2	chr1	61126007	61126166	-	32.38	Ancient
XLOC_000866	linc-DEPDC1-2	TCONS_00000544	lincRNA	chr1	69709055	69715106	-	6052	434	FIRST	2	chr1	69714898	69715106	209	40	19.1388	9.21659	30.1843	1	TSS	LTR79	LTR/ERVL	chr1	69715067	69715225	-	28.72	Ancient
XLOC_000866	linc-DEPDC1-2	TCONS_00000544	lincRNA	chr1	69709055	69715106	-	6052	434	LAST	1	chr1	69709055	69709279	225	14	6.22222	3.22581	30.1843	1	PolyA	L1PA6	LINE/L1	chr1	69708923	69709068	+	7.33	LineageSpe
XLOC_000866	linc-DEPDC1-2	TCONS_00000544	lincRNA	chr1	69709055	69715106	-	6052	434	FIRST	2	chr1	69714898	69715106	209	77	36.8421	17.7419	30.1843	1	SPL	MIRc	SINE/MIR	chr1	69714893	69714974	+	29.57	Ancient
XLOC_000868	linc-ANKRD13C-1	TCONS_00001523	lincRNA	chr1	71110666	71114581	-	3916	297	FIRST	2	chr1	71114347	71114581	235	58	24.6809	19.5286	19.5286	1	SPL	MIRb	SINE/MIR	chr1	71114326	71114404	+	29.76	Ancient
XLOC_000869	linc-ANKRD13C-2	TCONS_00000546	lincRNA	chr1	71181616	71185972	-	4357	432	LAST	1	chr1	71181616	71181959	344	333	96.8023	77.0833	77.0833	1	SPL	AluJr	SINE/Alu	chr1	71181627	71181965	-	16.75	LineageSpe
XLOC_000872	linc-SLC44A5-1	TCONS_00000549	lincRNA	chr1	76175700	76189696	-	13997	861	MIDDLE	2	chr1	76186030	76186090	61	13	21.3115	1.50987	68.525	1	SPL	LTR47A	LTR/ERVL	chr1	76185624	76186042	+	16.17	LineageSpe
XLOC_000872	linc-SLC44A5-1	TCONS_00000549	lincRNA	chr1	76175700	76189696	-	13997	861	LAST	1	chr1	76175700	76176308	609	320	52.5452	37.1661	68.525	1	exonized	AluJb	SINE/Alu	chr1	76175959	76176278	+	16.49	LineageSpe
XLOC_000872	linc-SLC44A5-1	TCONS_00000549	lincRNA	chr1	76175700	76189696	-	13997	861	LAST	1	chr1	76175700	76176308	609	257	42.2003	29.849	68.525	1	PolyA	L1ME1	LINE/L1	chr1	76175504	76175956	+	24.03	Ancient
XLOC_000876	linc-FUBP1-1	TCONS_00001527	lincRNA	chr1	79346570	79351681	-	5112	220	LAST	1	chr1	79346570	79346750	181	31	17.1271	14.0909	82.2727	1	PolyA	LTR7B	LTR/ERV1	chr1	79346174	79346600	+	6.6	LineageSpe
XLOC_000876	linc-FUBP1-1	TCONS_00001527	lincRNA	chr1	79346570	79351681	-	5112	220	LAST	1	chr1	79346570	79346750	181	150	82.8729	68.1818	82.2727	1	SPL	MSTB	LTR/ERVL-MaLR	chr1	79346601	79346967	-	16.86	LineageSpe
XLOC_000877	linc-ELTD1-3	TCONS_00001528	lincRNA	chr1	79490858	79493876	-	3019	254	LAST	1	chr1	79490858	79491009	152	152	100	59.8425	59.8425	1	PolyA_SPL	L4_C_Mam	LINE/RTE-X	chr1	79490828	79491185	+	30.96	Ancient
XLOC_000881	linc-ELTD1-7	TCONS_00001535	lincRNA	chr1	79789342	79790552	-	1211	686	FIRST	2	chr1	79790271	79790552	282	125	44.3262	18.2216	73.9067	1	SPL	L1MEd	LINE/L1	chr1	79790117	79790395	-	28.83	Ancient
XLOC_000881	linc-ELTD1-7	TCONS_00001535	lincRNA	chr1	79789342	79790552	-	1211	686	FIRST	2	chr1	79790271	79790552	282	124	43.9716	18.0758	73.9067	1	TSS	LTR8A	LTR/ERV1	chr1	79790429	79790945	-	16.51	LineageSpe
XLOC_000881	linc-ELTD1-7	TCONS_00001535	lincRNA	chr1	79789342	79790552	-	1211	686	LAST	1	chr1	79789342	79789745	404	258	63.8614	37.6093	73.9067	1	SPL	AluJb	SINE/Alu	chr1	79789488	79789771	+	16.49	LineageSpe
XLOC_000882	linc-ELTD1-4	TCONS_00000552	lincRNA	chr1	80839049	80840306	-	1258	580	FIRST	2	chr1	80840122	80840306	185	185	100	31.8966	71.3793	1	TSS_SPL	AluSz	SINE/Alu	chr1	80840100	80840388	+	12.11	LineageSpe
XLOC_000882	linc-ELTD1-4	TCONS_00000552	lincRNA	chr1	80839049	80840306	-	1258	580	LAST	1	chr1	80839049	80839443	395	100	25.3165	17.2414	71.3793	1	SPL	MIR	SINE/MIR	chr1	80839344	80839552	+	27.84	Ancient
XLOC_000882	linc-ELTD1-4	TCONS_00000552	lincRNA	chr1	80839049	80840306	-	1258	580	LAST	1	chr1	80839049	80839443	395	129	32.6582	22.2414	71.3793	1	PolyA	L1ME4b	LINE/L1	chr1	80838810	80839177	-	26.79	Ancient
XLOC_000883	linc-ELTD1-5	TCONS_00000553	lincRNA	chr1	81000663	81050048	-	49386	349	FIRST	2	chr1	81049975	81050048	74	74	100	21.2034	21.2034	1	SPL	LTR12	LTR/ERV1	chr1	81049163	81050048	+	9.23	LineageSpe
XLOC_000884	linc-ELTD1-10	TCONS_00000554	lincRNA	chr1	82680904	82726817	-	45914	671	FIRST	2	chr1	82726700	82726817	118	118	100	17.5857	17.5857	1	TSS_SPL	MER1A	DNA/hAT-Charlie	chr1	82726523	82727040	-	12.59	LineageSpe
XLOC_000885	linc-ELTD1-11	TCONS_00001536	lincRNA	chr1	83001858	83021203	-	19346	534	FIRST	2	chr1	83020832	83021203	372	372	100	69.6629	78.6517	1	TSS_SPL	L2c	LINE/L2	chr1	83020757	83021222	+	32.46	Ancient
XLOC_000885	linc-ELTD1-11	TCONS_00001536	lincRNA	chr1	83001858	83021203	-	19346	534	LAST	1	chr1	83001858	83002019	162	48	29.6296	8.98876	78.6517	1	PolyA	MamGypLTR1a	LTR/Gypsy	chr1	83001556	83001905	-	30.37	Ancient
XLOC_000889	linc-TTLL7-2	TCONS_00001546	lincRNA	chr1	84542062	84543595	-	1534	1296	LAST	1	chr1	84542062	84543325	1264	73	5.77532	5.63272	20.3704	1	exonized	L2c	LINE/L2	chr1	84542768	84542840	-	32.46	Ancient
XLOC_000889	linc-TTLL7-2	TCONS_00001546	lincRNA	chr1	84542062	84543595	-	1534	1296	LAST	1	chr1	84542062	84543325	1264	191	15.1108	14.7377	20.3704	1	exonized	MIR	SINE/MIR	chr1	84542453	84542643	+	27.84	Ancient
XLOC_000892	linc-TTLL7-7	TCONS_00001549	lincRNA	chr1	84830731	84831416	-	686	593	FIRST	2	chr1	84831272	84831416	145	40	27.5862	6.74536	6.74536	2	TSS	Tigger15a	DNA/TcMar-Tigger	chr1	84831377	84831611	-	29.03	Ancient
XLOC_000893	linc-TTLL7-6	TCONS_00001550	lincRNA	chr1	84920352	84924713	-	4362	390	FIRST	3	chr1	84924612	84924713	102	102	100	26.1538	26.1538	1	TSS_SPL	MSTB1	LTR/ERVL-MaLR	chr1	84924579	84924967	-	16.52	LineageSpe
XLOC_000894	linc-TTLL7-3	TCONS_00001551	lincRNA	chr1	84937581	84943596	-	6016	301	FIRST	2	chr1	84943430	84943596	167	167	100	55.4817	55.4817	1	TSS_SPL	L2a	LINE/L2	chr1	84943095	84943696	+	29.37	Ancient
XLOC_000895	linc-CTBS-1	TCONS_00001553	lincRNA	chr1	85079755	85086673	-	6919	979	LAST	1	chr1	85079755	85080350	596	308	51.6779	31.4607	60.8784	4	PolyA	LOR1b	LTR/ERV1	chr1	85079684	85080062	-	17.81	LineageSpe
XLOC_000895	linc-CTBS-1	TCONS_00001553	lincRNA	chr1	85079755	85086673	-	6919	979	LAST	1	chr1	85079755	85080350	596	288	48.3221	29.4178	60.8784	4	SPL	MLT1J	LTR/ERVL-MaLR	chr1	85080063	85080374	-	28.52	Ancient
XLOC_000895	linc-CTBS-1	TCONS_00002400	lincRNA	chr1	85079755	85086497	-	6743	806	LAST	1	chr1	85079755	85080350	596	308	51.6779	38.2134	73.9454	4	PolyA	LOR1b	LTR/ERV1	chr1	85079684	85080062	-	17.81	LineageSpe
XLOC_000895	linc-CTBS-1	TCONS_00002400	lincRNA	chr1	85079755	85086497	-	6743	806	LAST	1	chr1	85079755	85080350	596	288	48.3221	35.732	73.9454	4	SPL	MLT1J	LTR/ERVL-MaLR	chr1	85080063	85080374	-	28.52	Ancient
XLOC_000895	linc-CTBS-1	TCONS_00002401	lincRNA	chr1	85080035	85084508	-	4474	266	LAST	1	chr1	85080035	85080207	173	28	16.185	10.5263	65.0376	4	PolyA	LOR1b	LTR/ERV1	chr1	85079684	85080062	-	17.81	LineageSpe
XLOC_000895	linc-CTBS-1	TCONS_00002401	lincRNA	chr1	85080035	85084508	-	4474	266	LAST	1	chr1	85080035	85080207	173	145	83.815	54.5113	65.0376	4	SPL	MLT1J	LTR/ERVL-MaLR	chr1	85080063	85080374	-	28.52	Ancient
XLOC_000897	linc-ODF2L-1	TCONS_00001555	lincRNA	chr1	86966982	86969353	-	2372	1823	LAST	1	chr1	86966982	86968599	1618	57	3.52287	3.12671	45.4745	1	exonized	HERVK11-int	LTR/ERVK	chr1	86968418	86968474	+	8.38	LineageSpe
XLOC_000897	linc-ODF2L-1	TCONS_00001555	lincRNA	chr1	86966982	86969353	-	2372	1823	LAST	1	chr1	86966982	86968599	1618	772	47.7132	42.3478	45.4745	1	PolyA	L4_A_Mam	LINE/RTE-X	chr1	86966981	86967753	-	30.93	Ancient
XLOC_000899	linc-SEP15-7	TCONS_00001557	lincRNA	chr1	87781430	87786243	-	4814	444	LAST	1	chr1	87781430	87781511	82	21	25.6098	4.72973	102.027	1	SPL	MLT1J	LTR/ERVL-MaLR	chr1	87781491	87781682	-	28.52	Ancient
XLOC_000899	linc-SEP15-7	TCONS_00001557	lincRNA	chr1	87781430	87786243	-	4814	444	LAST	1	chr1	87781430	87781511	82	58	70.7317	13.0631	102.027	1	PolyA	L2a	LINE/L2	chr1	87780812	87781487	+	29.37	Ancient
XLOC_000899	linc-SEP15-7	TCONS_00001557	lincRNA	chr1	87781430	87786243	-	4814	444	FIRST	2	chr1	87785882	87786243	362	337	93.0939	75.9009	102.027	1	SPL	MLT1E1A	LTR/ERVL-MaLR	chr1	87785748	87786218	-	24.11	Ancient
XLOC_000899	linc-SEP15-7	TCONS_00001557	lincRNA	chr1	87781430	87786243	-	4814	444	FIRST	2	chr1	87785882	87786243	362	37	10.221	8.33333	102.027	1	TSS	MLT1E1A	LTR/ERVL-MaLR	chr1	87786207	87786304	-	24.11	Ancient
XLOC_000901	linc-SEP15-3	TCONS_00000086	lincRNA	chr1	87819212	87837338	-	18127	884	FIRST	4	chr1	87837252	87837338	87	75	86.2069	8.48416	44.3439	5	SPL	L2b	LINE/L2	chr1	87837092	87837326	-	32.38	Ancient
XLOC_000901	linc-SEP15-3	TCONS_00000086	lincRNA	chr1	87819212	87837338	-	18127	884	MIDDLE	2	chr1	87820527	87820881	355	13	3.66197	1.47059	44.3439	5	SPL	L2a	LINE/L2	chr1	87820869	87820971	+	29.37	Ancient
XLOC_000901	linc-SEP15-3	TCONS_00000086	lincRNA	chr1	87819212	87837338	-	18127	884	LAST	1	chr1	87819212	87819550	339	191	56.3422	21.6063	44.3439	5	exonized	MIR	SINE/MIR	chr1	87819336	87819526	-	27.84	Ancient
XLOC_000901	linc-SEP15-3	TCONS_00000086	lincRNA	chr1	87819212	87837338	-	18127	884	LAST	1	chr1	87819212	87819550	339	113	33.3333	12.7828	44.3439	5	PolyA	Tigger19a	DNA/TcMar-Tigger	chr1	87819125	87819324	-	31.56	Ancient
XLOC_000901	linc-SEP15-3	TCONS_00001559	lincRNA	chr1	87818532	87837373	-	18842	1596	FIRST	4	chr1	87837252	87837373	122	75	61.4754	4.69925	37.406	5	SPL	L2b	LINE/L2	chr1	87837092	87837326	-	32.38	Ancient
XLOC_000901	linc-SEP15-3	TCONS_00001559	lincRNA	chr1	87818532	87837373	-	18842	1596	MIDDLE	2	chr1	87820527	87820881	355	13	3.66197	0.814536	37.406	5	SPL	L2a	LINE/L2	chr1	87820869	87820971	+	29.37	Ancient
XLOC_000901	linc-SEP15-3	TCONS_00001559	lincRNA	chr1	87818532	87837373	-	18842	1596	LAST	1	chr1	87818532	87819550	1019	57	5.59372	3.57143	37.406	5	exonized	MIRc	SINE/MIR	chr1	87818891	87818947	+	29.57	Ancient
XLOC_000901	linc-SEP15-3	TCONS_00001559	lincRNA	chr1	87818532	87837373	-	18842	1596	LAST	1	chr1	87818532	87819550	1019	191	18.7439	11.9674	37.406	5	exonized	MIR	SINE/MIR	chr1	87819336	87819526	-	27.84	Ancient
XLOC_000901	linc-SEP15-3	TCONS_00001559	lincRNA	chr1	87818532	87837373	-	18842	1596	LAST	1	chr1	87818532	87819550	1019	61	5.98626	3.82206	37.406	5	exonized	MIRc	SINE/MIR	chr1	87818776	87818836	+	29.57	Ancient
XLOC_000901	linc-SEP15-3	TCONS_00001559	lincRNA	chr1	87818532	87837373	-	18842	1596	LAST	1	chr1	87818532	87819550	1019	200	19.6271	12.5313	37.406	5	exonized	Tigger19a	DNA/TcMar-Tigger	chr1	87819125	87819324	-	31.56	Ancient
XLOC_000901	linc-SEP15-3	TCONS_00001560	lincRNA	chr1	87819002	87837382	-	18381	780	FIRST	3	chr1	87837252	87837382	131	75	57.2519	9.61538	59.7436	5	SPL	L2b	LINE/L2	chr1	87837092	87837326	-	32.38	Ancient
XLOC_000901	linc-SEP15-3	TCONS_00001560	lincRNA	chr1	87819002	87837382	-	18381	780	LAST	1	chr1	87819002	87819550	549	191	34.7905	24.4872	59.7436	5	exonized	MIR	SINE/MIR	chr1	87819336	87819526	-	27.84	Ancient
XLOC_000901	linc-SEP15-3	TCONS_00001560	lincRNA	chr1	87819002	87837382	-	18381	780	LAST	1	chr1	87819002	87819550	549	200	36.4299	25.641	59.7436	5	exonized	Tigger19a	DNA/TcMar-Tigger	chr1	87819125	87819324	-	31.56	Ancient
XLOC_000901	linc-SEP15-3	TCONS_00002402	lincRNA	chr1	87818852	87837373	-	18522	924	FIRST	3	chr1	87837252	87837373	122	75	61.4754	8.11688	56.6017	5	SPL	L2b	LINE/L2	chr1	87837092	87837326	-	32.38	Ancient
XLOC_000901	linc-SEP15-3	TCONS_00002402	lincRNA	chr1	87818852	87837373	-	18522	924	LAST	1	chr1	87818852	87819550	699	57	8.15451	6.16883	56.6017	5	exonized	MIRc	SINE/MIR	chr1	87818891	87818947	+	29.57	Ancient
XLOC_000901	linc-SEP15-3	TCONS_00002402	lincRNA	chr1	87818852	87837373	-	18522	924	LAST	1	chr1	87818852	87819550	699	200	28.6123	21.645	56.6017	5	exonized	Tigger19a	DNA/TcMar-Tigger	chr1	87819125	87819324	-	31.56	Ancient
XLOC_000901	linc-SEP15-3	TCONS_00002402	lincRNA	chr1	87818852	87837373	-	18522	924	LAST	1	chr1	87818852	87819550	699	191	27.3247	20.671	56.6017	5	exonized	MIR	SINE/MIR	chr1	87819336	87819526	-	27.84	Ancient
XLOC_000901	linc-SEP15-3	TCONS_00002403	lincRNA	chr1	87836885	87837373	-	489	247	FIRST	2	chr1	87837252	87837373	122	75	61.4754	30.3644	80.9717	5	SPL	L2b	LINE/L2	chr1	87837092	87837326	-	32.38	Ancient
XLOC_000901	linc-SEP15-3	TCONS_00002403	lincRNA	chr1	87836885	87837373	-	489	247	LAST	1	chr1	87836885	87837009	125	125	100	50.6073	80.9717	5	PolyA_SPL	AluSc8	SINE/Alu	chr1	87836877	87837032	+	9.65	LineageSpe
XLOC_000902	linc-SEP15-2	TCONS_00000558	lincRNA	chr1	88365592	88371397	-	5806	787	MIDDLE	2	chr1	88369582	88369760	179	51	28.4916	6.4803	6.4803	3	SPL	MIRc	SINE/MIR	chr1	88369561	88369632	-	29.57	Ancient
XLOC_000902	linc-SEP15-2	TCONS_00001562	lincRNA	chr1	88369581	88371222	-	1642	280	LAST	1	chr1	88369581	88369760	180	52	28.8889	18.5714	18.5714	3	PolyA	MIRc	SINE/MIR	chr1	88369561	88369632	-	29.57	Ancient
XLOC_000903	linc-SEP15-1	TCONS_00001563	lincRNA	chr1	88817765	88821171	-	3407	259	FIRST	2	chr1	88821114	88821171	58	58	100	22.3938	22.3938	1	TSS_SPL	LTR16A	LTR/ERVL	chr1	88820770	88821201	+	28.44	Ancient
XLOC_000905	linc-SEP15-5	TCONS_00001565	lincRNA	chr1	88994518	88995568	-	1051	300	LAST	1	chr1	88994518	88994773	256	34	13.2812	11.3333	45	2	exonized	L2b	LINE/L2	chr1	88994726	88994759	+	32.38	Ancient
XLOC_000905	linc-SEP15-5	TCONS_00001565	lincRNA	chr1	88994518	88995568	-	1051	300	LAST	1	chr1	88994518	88994773	256	28	10.9375	9.33333	45	2	SPL	L3	LINE/CR1	chr1	88994746	88994915	+	32.5	Ancient
XLOC_000905	linc-SEP15-5	TCONS_00001565	lincRNA	chr1	88994518	88995568	-	1051	300	LAST	1	chr1	88994518	88994773	256	73	28.5156	24.3333	45	2	PolyA	L2c	LINE/L2	chr1	88994489	88994590	-	32.46	Ancient
XLOC_000905	linc-SEP15-5	TCONS_00001566	lincRNA	chr1	88994518	88995833	-	1316	284	LAST	1	chr1	88994518	88994773	256	34	13.2812	11.9718	47.5352	2	exonized	L2b	LINE/L2	chr1	88994726	88994759	+	32.38	Ancient
XLOC_000905	linc-SEP15-5	TCONS_00001566	lincRNA	chr1	88994518	88995833	-	1316	284	LAST	1	chr1	88994518	88994773	256	28	10.9375	9.85915	47.5352	2	SPL	L3	LINE/CR1	chr1	88994746	88994915	+	32.5	Ancient
XLOC_000905	linc-SEP15-5	TCONS_00001566	lincRNA	chr1	88994518	88995833	-	1316	284	LAST	1	chr1	88994518	88994773	256	73	28.5156	25.7042	47.5352	2	PolyA	L2c	LINE/L2	chr1	88994489	88994590	-	32.46	Ancient
XLOC_000907	linc-GBP5-1	TCONS_00001568	lincRNA	chr1	89938509	89939606	-	1098	213	FIRST	2	chr1	89939562	89939606	45	45	100	21.1268	100	1	TSS_SPL	L1PA11	LINE/L1	chr1	89938220	89945018	+	11.48	LineageSpe
XLOC_000907	linc-GBP5-1	TCONS_00001568	lincRNA	chr1	89938509	89939606	-	1098	213	LAST	1	chr1	89938509	89938676	168	168	100	78.8732	100	1	PolyA_SPL	L1PA11	LINE/L1	chr1	89938220	89945018	+	11.48	LineageSpe
XLOC_000909	linc-GBP5-2	TCONS_00000019	lincRNA	chr1	90090408	90098453	-	8046	789	LAST	1	chr1	90090408	90090764	357	155	43.4174	19.6451	19.6451	7	PolyA	MER103C	DNA/hAT-Charlie	chr1	90090338	90090562	+	28.01	Ancient
XLOC_000909	linc-GBP5-2	TCONS_00001570	lincRNA	chr1	90076598	90098553	-	21956	661	LAST	1	chr1	90076598	90076730	133	118	88.7218	17.8517	17.8517	7	SPL	MIRb	SINE/MIR	chr1	90076613	90076830	+	29.76	Ancient
XLOC_000909	linc-GBP5-2	TCONS_00001572	lincRNA	chr1	90091481	90098492	-	7012	1376	LAST	1	chr1	90091481	90092385	905	554	61.2155	40.2616	40.2616	7	SPL	MER21C	LTR/ERVL	chr1	90091832	90092519	-	22.29	Ancient
XLOC_000909	linc-GBP5-2	TCONS_00001573	lincRNA	chr1	90091547	90098507	-	6961	1321	LAST	1	chr1	90091547	90092385	839	554	66.031	41.9379	41.9379	7	SPL	MER21C	LTR/ERVL	chr1	90091832	90092519	-	22.29	Ancient
XLOC_000909	linc-GBP5-2	TCONS_00002404	lincRNA	chr1	90076598	90098492	-	21895	604	LAST	1	chr1	90076598	90076730	133	118	88.7218	19.5364	19.5364	7	SPL	MIRb	SINE/MIR	chr1	90076613	90076830	+	29.76	Ancient
XLOC_000910	linc-GBP5-3	TCONS_00001575	lincRNA	chr1	90224688	90229610	-	4923	1177	FIRST	3	chr1	90228890	90229610	721	95	13.1761	8.07137	8.07137	1	exonized	MIRb	SINE/MIR	chr1	90229421	90229515	+	29.76	Ancient
XLOC_000911	linc-GBP5-4	TCONS_00001576	lincRNA	chr1	90226521	90227777	-	1257	300	LAST	1	chr1	90226521	90226548	28	28	100	9.33333	9.33333	1	PolyA_SPL	MER5A	DNA/hAT-Charlie	chr1	90226470	90226568	-	25.27	Ancient
XLOC_000912	linc-GBP5-5	TCONS_00000561	lincRNA	chr1	90421225	90422281	-	1057	598	FIRST	2	chr1	90422220	90422281	62	62	100	10.3679	58.3612	1	TSS_SPL	AluJo	SINE/Alu	chr1	90422073	90422354	+	16.42	LineageSpe
XLOC_000912	linc-GBP5-5	TCONS_00000561	lincRNA	chr1	90421225	90422281	-	1057	598	LAST	1	chr1	90421225	90421760	536	127	23.694	21.2375	58.3612	1	SPL	AluSx	SINE/Alu	chr1	90421634	90421854	-	11.66	LineageSpe
XLOC_000912	linc-GBP5-5	TCONS_00000561	lincRNA	chr1	90421225	90422281	-	1057	598	LAST	1	chr1	90421225	90421760	536	160	29.8507	26.7559	58.3612	1	PolyA	MER39	LTR/ERV1	chr1	90420757	90421384	+	20.25	LineageSpe
XLOC_000913	linc-GBP5-6	TCONS_00001577	lincRNA	chr1	90752760	90763021	-	10262	585	FIRST	2	chr1	90762498	90763021	524	318	60.687	54.359	78.4615	1	exonized	L2c	LINE/L2	chr1	90762550	90762867	+	32.46	Ancient
XLOC_000913	linc-GBP5-6	TCONS_00001577	lincRNA	chr1	90752760	90763021	-	10262	585	FIRST	2	chr1	90762498	90763021	524	141	26.9084	24.1026	78.4615	1	exonized	MIRb	SINE/MIR	chr1	90762881	90763021	-	29.76	Ancient
XLOC_000914	linc-GBP5-7	TCONS_00000562	lincRNA	chr1	90976467	90999029	-	22563	231	FIRST	4	chr1	90998925	90999029	105	42	40	18.1818	18.1818	2	SPL	MIRc	SINE/MIR	chr1	90998742	90998966	-	29.57	Ancient
XLOC_000914	linc-GBP5-7	TCONS_00001578	lincRNA	chr1	90978720	90998992	-	20273	915	FIRST	2	chr1	90998925	90998992	68	42	61.7647	4.59016	63.6066	2	SPL	MIRc	SINE/MIR	chr1	90998742	90998966	-	29.57	Ancient
XLOC_000914	linc-GBP5-7	TCONS_00001578	lincRNA	chr1	90978720	90998992	-	20273	915	LAST	1	chr1	90978720	90979566	847	121	14.2857	13.224	63.6066	2	exonized	L2a	LINE/L2	chr1	90978802	90978922	-	29.37	Ancient
XLOC_000914	linc-GBP5-7	TCONS_00001578	lincRNA	chr1	90978720	90998992	-	20273	915	LAST	1	chr1	90978720	90979566	847	419	49.4687	45.7923	63.6066	2	exonized	MSTA	LTR/ERVL-MaLR	chr1	90979022	90979440	+	14.8	LineageSpe
XLOC_000915	linc-BARHL2-1	TCONS_00001579	lincRNA	chr1	91248095	91301414	-	53320	1275	MIDDLE	2	chr1	91254955	91255044	90	90	100	7.05882	46.5882	7	Both_SPL	MSTA	LTR/ERVL-MaLR	chr1	91254907	91255249	-	14.8	LineageSpe
XLOC_000915	linc-BARHL2-1	TCONS_00001579	lincRNA	chr1	91248095	91301414	-	53320	1275	LAST	1	chr1	91248095	91248980	886	320	36.1174	25.098	46.5882	7	PolyA	AluSx	SINE/Alu	chr1	91248092	91248414	-	11.66	LineageSpe
XLOC_000915	linc-BARHL2-1	TCONS_00001579	lincRNA	chr1	91248095	91301414	-	53320	1275	LAST	1	chr1	91248095	91248980	886	184	20.7675	14.4314	46.5882	7	exonized	MIRb	SINE/MIR	chr1	91248464	91248647	-	29.76	Ancient
XLOC_000915	linc-BARHL2-1	TCONS_00001580	lincRNA	chr1	91248095	91317232	-	69138	1169	MIDDLE	2	chr1	91254955	91255044	90	90	100	7.69889	50.8127	7	Both_SPL	MSTA	LTR/ERVL-MaLR	chr1	91254907	91255249	-	14.8	LineageSpe
XLOC_000915	linc-BARHL2-1	TCONS_00001580	lincRNA	chr1	91248095	91317232	-	69138	1169	LAST	1	chr1	91248095	91248980	886	320	36.1174	27.3738	50.8127	7	PolyA	AluSx	SINE/Alu	chr1	91248092	91248414	-	11.66	LineageSpe
XLOC_000915	linc-BARHL2-1	TCONS_00001580	lincRNA	chr1	91248095	91317232	-	69138	1169	LAST	1	chr1	91248095	91248980	886	184	20.7675	15.7399	50.8127	7	exonized	MIRb	SINE/MIR	chr1	91248464	91248647	-	29.76	Ancient
XLOC_000915	linc-BARHL2-1	TCONS_00001581	lincRNA	chr1	91248547	91255092	-	6546	572	FIRST	2	chr1	91254955	91255092	138	138	100	24.1259	41.7832	7	TSS_SPL	MSTA	LTR/ERVL-MaLR	chr1	91254907	91255249	-	14.8	LineageSpe
XLOC_000915	linc-BARHL2-1	TCONS_00001581	lincRNA	chr1	91248547	91255092	-	6546	572	LAST	1	chr1	91248547	91248980	434	101	23.2719	17.6573	41.7832	7	PolyA	MIRb	SINE/MIR	chr1	91248464	91248647	-	29.76	Ancient
XLOC_000916	linc-HFM1-1	TCONS_00001583	lincRNA	chr1	91954577	91964760	-	10184	905	FIRST	2	chr1	91964072	91964760	689	425	61.6836	46.9613	71.2707	2	exonized	L2a	LINE/L2	chr1	91964116	91964540	+	29.37	Ancient
XLOC_000916	linc-HFM1-1	TCONS_00001583	lincRNA	chr1	91954577	91964760	-	10184	905	FIRST	2	chr1	91964072	91964760	689	220	31.9303	24.3094	71.2707	2	TSS	MER90a	LTR/ERV1	chr1	91964541	91965146	-	23.75	Ancient
XLOC_000917	linc-HFM1-2	TCONS_00001584	lincRNA	chr1	92010899	92035089	-	24191	2055	FIRST	2	chr1	92034970	92035089	120	61	50.8333	2.96837	12.1168	1	SPL	MIRb	SINE/MIR	chr1	92034908	92035030	-	29.76	Ancient
XLOC_000917	linc-HFM1-2	TCONS_00001584	lincRNA	chr1	92010899	92035089	-	24191	2055	LAST	1	chr1	92010899	92012833	1935	188	9.71576	9.14842	12.1168	1	exonized	L2b	LINE/L2	chr1	92011199	92011386	+	32.38	Ancient
XLOC_000918	linc-TMED5-1	TCONS_00000020	lincRNA	chr1	93775666	93811368	-	35703	4033	MIDDLE	6	chr1	93804914	93805093	180	89	49.4444	2.20679	55.4674	15	SPL	MLT1H	LTR/ERVL-MaLR	chr1	93805005	93805156	+	26.7	Ancient
XLOC_000918	linc-TMED5-1	TCONS_00000020	lincRNA	chr1	93775666	93811368	-	35703	4033	MIDDLE	3	chr1	93791326	93791452	127	51	40.1575	1.26457	55.4674	15	SPL	AluSz	SINE/Alu	chr1	93791080	93791376	-	12.11	LineageSpe
XLOC_000918	linc-TMED5-1	TCONS_00000020	lincRNA	chr1	93775666	93811368	-	35703	4033	MIDDLE	4	chr1	93792159	93792219	61	51	83.6066	1.26457	55.4674	15	SPL	L2	LINE/L2	chr1	93791964	93792209	-	32.38	Ancient
XLOC_000918	linc-TMED5-1	TCONS_00000020	lincRNA	chr1	93775666	93811368	-	35703	4033	MIDDLE	2	chr1	93790192	93790286	95	95	100	2.35557	55.4674	15	Both_SPL	L2a	LINE/L2	chr1	93790120	93790331	+	29.37	Ancient
XLOC_000918	linc-TMED5-1	TCONS_00000020	lincRNA	chr1	93775666	93811368	-	35703	4033	MIDDLE	5	chr1	93802934	93804831	1898	70	3.68809	1.73568	55.4674	15	exonized	MLT1H	LTR/ERVL-MaLR	chr1	93804178	93804247	+	26.7	Ancient
XLOC_000918	linc-TMED5-1	TCONS_00000020	lincRNA	chr1	93775666	93811368	-	35703	4033	MIDDLE	5	chr1	93802934	93804831	1898	238	12.5395	5.90131	55.4674	15	exonized	AluJr	SINE/Alu	chr1	93803417	93803654	-	16.75	LineageSpe
XLOC_000918	linc-TMED5-1	TCONS_00000020	lincRNA	chr1	93775666	93811368	-	35703	4033	LAST	1	chr1	93775666	93777165	1500	296	19.7333	7.33945	55.4674	15	exonized	AluSq2	SINE/Alu	chr1	93776295	93776590	+	10.62	LineageSpe
XLOC_000918	linc-TMED5-1	TCONS_00000020	lincRNA	chr1	93775666	93811368	-	35703	4033	MIDDLE	5	chr1	93802934	93804831	1898	122	6.42782	3.02504	55.4674	15	exonized	MIR	SINE/MIR	chr1	93802957	93803078	+	27.84	Ancient
XLOC_000918	linc-TMED5-1	TCONS_00000020	lincRNA	chr1	93775666	93811368	-	35703	4033	MIDDLE	5	chr1	93802934	93804831	1898	274	14.4362	6.79395	55.4674	15	SPL	L2b	LINE/L2	chr1	93804558	93804875	+	32.38	Ancient
XLOC_000918	linc-TMED5-1	TCONS_00000020	lincRNA	chr1	93775666	93811368	-	35703	4033	LAST	1	chr1	93775666	93777165	1500	13	0.866667	0.322341	55.4674	15	SPL	L1M1	LINE/L1	chr1	93777153	93777896	+	16.76	Ancient
XLOC_000918	linc-TMED5-1	TCONS_00000020	lincRNA	chr1	93775666	93811368	-	35703	4033	LAST	1	chr1	93775666	93777165	1500	377	25.1333	9.34788	55.4674	15	exonized	L1M1	LINE/L1	chr1	93775918	93776294	+	16.76	Ancient
XLOC_000918	linc-TMED5-1	TCONS_00000020	lincRNA	chr1	93775666	93811368	-	35703	4033	LAST	1	chr1	93775666	93777165	1500	561	37.4	13.9102	55.4674	15	exonized	L1M1	LINE/L1	chr1	93776591	93777151	+	16.76	Ancient
XLOC_000918	linc-TMED5-1	TCONS_00000564	lincRNA	chr1	93770668	93804931	-	34264	600	MIDDLE	3	chr1	93791326	93791452	127	51	40.1575	8.5	24.3333	15	SPL	AluSz	SINE/Alu	chr1	93791080	93791376	-	12.11	LineageSpe
XLOC_000918	linc-TMED5-1	TCONS_00000564	lincRNA	chr1	93770668	93804931	-	34264	600	MIDDLE	2	chr1	93790192	93790286	95	95	100	15.8333	24.3333	15	Both_SPL	L2a	LINE/L2	chr1	93790120	93790331	+	29.37	Ancient
XLOC_000918	linc-TMED5-1	TCONS_00000565	lincRNA	chr1	93775310	93804091	-	28782	596	MIDDLE	4	chr1	93802934	93803069	136	113	83.0882	18.9597	49.8322	15	SPL	MIR	SINE/MIR	chr1	93802957	93803078	+	27.84	Ancient
XLOC_000918	linc-TMED5-1	TCONS_00000565	lincRNA	chr1	93775310	93804091	-	28782	596	LAST	1	chr1	93775310	93775347	38	38	100	6.37584	49.8322	15	PolyA_SPL	AluSz6	SINE/Alu	chr1	93775075	93775383	+	13.16	LineageSpe
XLOC_000918	linc-TMED5-1	TCONS_00000565	lincRNA	chr1	93775310	93804091	-	28782	596	MIDDLE	2	chr1	93790192	93790286	95	95	100	15.9396	49.8322	15	Both_SPL	L2a	LINE/L2	chr1	93790120	93790331	+	29.37	Ancient
XLOC_000918	linc-TMED5-1	TCONS_00000565	lincRNA	chr1	93775310	93804091	-	28782	596	MIDDLE	3	chr1	93791326	93791452	127	51	40.1575	8.55705	49.8322	15	SPL	AluSz	SINE/Alu	chr1	93791080	93791376	-	12.11	LineageSpe
XLOC_000918	linc-TMED5-1	TCONS_00000566	lincRNA	chr1	93776837	93802994	-	26158	492	FIRST	4	chr1	93802934	93802994	61	38	62.2951	7.72358	74.3902	15	TSS	MIR	SINE/MIR	chr1	93802957	93803078	+	27.84	Ancient
XLOC_000918	linc-TMED5-1	TCONS_00000566	lincRNA	chr1	93776837	93802994	-	26158	492	LAST	1	chr1	93776837	93777165	329	13	3.95137	2.64228	74.3902	15	SPL	L1M1	LINE/L1	chr1	93777153	93777896	+	16.76	Ancient
XLOC_000918	linc-TMED5-1	TCONS_00000566	lincRNA	chr1	93776837	93802994	-	26158	492	LAST	1	chr1	93776837	93777165	329	315	95.7447	64.0244	74.3902	15	PolyA	L1M1	LINE/L1	chr1	93776591	93777151	+	16.76	Ancient
XLOC_000918	linc-TMED5-1	TCONS_00000567	lincRNA	chr1	93777042	93803122	-	26081	535	FIRST	4	chr1	93802934	93803122	189	122	64.5503	22.8037	73.0841	15	exonized	MIR	SINE/MIR	chr1	93802957	93803078	+	27.84	Ancient
XLOC_000918	linc-TMED5-1	TCONS_00000567	lincRNA	chr1	93777042	93803122	-	26081	535	LAST	1	chr1	93777042	93777165	124	13	10.4839	2.42991	73.0841	15	SPL	L1M1	LINE/L1	chr1	93777153	93777896	+	16.76	Ancient
XLOC_000918	linc-TMED5-1	TCONS_00000567	lincRNA	chr1	93777042	93803122	-	26081	535	MIDDLE	2	chr1	93790192	93790286	95	95	100	17.757	73.0841	15	Both_SPL	L2a	LINE/L2	chr1	93790120	93790331	+	29.37	Ancient
XLOC_000918	linc-TMED5-1	TCONS_00000567	lincRNA	chr1	93777042	93803122	-	26081	535	MIDDLE	3	chr1	93791326	93791452	127	51	40.1575	9.53271	73.0841	15	SPL	AluSz	SINE/Alu	chr1	93791080	93791376	-	12.11	LineageSpe
XLOC_000918	linc-TMED5-1	TCONS_00000567	lincRNA	chr1	93777042	93803122	-	26081	535	LAST	1	chr1	93777042	93777165	124	110	88.7097	20.5607	73.0841	15	PolyA	L1M1	LINE/L1	chr1	93776591	93777151	+	16.76	Ancient
XLOC_000918	linc-TMED5-1	TCONS_00000568	lincRNA	chr1	93790263	93811360	-	21098	675	LAST	1	chr1	93790263	93790286	24	24	100	3.55556	49.4815	15	PolyA_SPL	L2a	LINE/L2	chr1	93790120	93790331	+	29.37	Ancient
XLOC_000918	linc-TMED5-1	TCONS_00000568	lincRNA	chr1	93790263	93811360	-	21098	675	MIDDLE	5	chr1	93804914	93805093	180	89	49.4444	13.1852	49.4815	15	SPL	MLT1H	LTR/ERVL-MaLR	chr1	93805005	93805156	+	26.7	Ancient
XLOC_000918	linc-TMED5-1	TCONS_00000568	lincRNA	chr1	93790263	93811360	-	21098	675	MIDDLE	2	chr1	93791326	93791452	127	51	40.1575	7.55556	49.4815	15	SPL	AluSz	SINE/Alu	chr1	93791080	93791376	-	12.11	LineageSpe
XLOC_000918	linc-TMED5-1	TCONS_00000568	lincRNA	chr1	93790263	93811360	-	21098	675	MIDDLE	3	chr1	93792159	93792219	61	51	83.6066	7.55556	49.4815	15	SPL	L2	LINE/L2	chr1	93791964	93792209	-	32.38	Ancient
XLOC_000918	linc-TMED5-1	TCONS_00000568	lincRNA	chr1	93790263	93811360	-	21098	675	MIDDLE	4	chr1	93804713	93804831	119	119	100	17.6296	49.4815	15	Both_SPL	L2b	LINE/L2	chr1	93804558	93804875	+	32.38	Ancient
XLOC_000918	linc-TMED5-1	TCONS_00000569	lincRNA	chr1	93804252	93811405	-	7154	969	MIDDLE	2	chr1	93804914	93805093	180	89	49.4444	9.18473	37.4613	15	SPL	MLT1H	LTR/ERVL-MaLR	chr1	93805005	93805156	+	26.7	Ancient
XLOC_000918	linc-TMED5-1	TCONS_00000569	lincRNA	chr1	93804252	93811405	-	7154	969	LAST	1	chr1	93804252	93804831	580	274	47.2414	28.2766	37.4613	15	SPL	L2b	LINE/L2	chr1	93804558	93804875	+	32.38	Ancient
XLOC_000918	linc-TMED5-1	TCONS_00000570	lincRNA	chr1	93804472	93811357	-	6886	752	MIDDLE	2	chr1	93804914	93805093	180	89	49.4444	11.8351	48.2713	15	SPL	MLT1H	LTR/ERVL-MaLR	chr1	93805005	93805156	+	26.7	Ancient
XLOC_000918	linc-TMED5-1	TCONS_00000570	lincRNA	chr1	93804472	93811357	-	6886	752	LAST	1	chr1	93804472	93804831	360	274	76.1111	36.4362	48.2713	15	SPL	L2b	LINE/L2	chr1	93804558	93804875	+	32.38	Ancient
XLOC_000918	linc-TMED5-1	TCONS_00000571	lincRNA	chr1	93804486	93811340	-	6855	748	MIDDLE	2	chr1	93804914	93805093	180	89	49.4444	11.8984	48.5294	15	SPL	MLT1H	LTR/ERVL-MaLR	chr1	93805005	93805156	+	26.7	Ancient
XLOC_000918	linc-TMED5-1	TCONS_00000571	lincRNA	chr1	93804486	93811340	-	6855	748	LAST	1	chr1	93804486	93804831	346	274	79.1908	36.631	48.5294	15	SPL	L2b	LINE/L2	chr1	93804558	93804875	+	32.38	Ancient
XLOC_000918	linc-TMED5-1	TCONS_00000572	lincRNA	chr1	93804495	93811403	-	6909	806	LAST	1	chr1	93804495	93805093	599	318	53.0885	39.4541	50.4963	15	exonized	L2b	LINE/L2	chr1	93804558	93804875	+	32.38	Ancient
XLOC_000918	linc-TMED5-1	TCONS_00000572	lincRNA	chr1	93804495	93811403	-	6909	806	LAST	1	chr1	93804495	93805093	599	89	14.8581	11.0422	50.4963	15	SPL	MLT1H	LTR/ERVL-MaLR	chr1	93805005	93805156	+	26.7	Ancient
XLOC_000918	linc-TMED5-1	TCONS_00000573	lincRNA	chr1	93804496	93811384	-	6889	620	MIDDLE	2	chr1	93804914	93805093	180	89	49.4444	14.3548	58.5484	15	SPL	MLT1H	LTR/ERVL-MaLR	chr1	93805005	93805156	+	26.7	Ancient
XLOC_000918	linc-TMED5-1	TCONS_00000573	lincRNA	chr1	93804496	93811384	-	6889	620	LAST	1	chr1	93804496	93804831	336	274	81.5476	44.1935	58.5484	15	SPL	L2b	LINE/L2	chr1	93804558	93804875	+	32.38	Ancient
XLOC_000918	linc-TMED5-1	TCONS_00001585	lincRNA	chr1	93776964	93804222	-	27259	891	FIRST	6	chr1	93803931	93804222	292	45	15.411	5.05051	56.6779	15	TSS	MLT1H	LTR/ERVL-MaLR	chr1	93804178	93804247	+	26.7	Ancient
XLOC_000918	linc-TMED5-1	TCONS_00001585	lincRNA	chr1	93776964	93804222	-	27259	891	MIDDLE	2	chr1	93790192	93790286	95	95	100	10.6622	56.6779	15	Both_SPL	L2a	LINE/L2	chr1	93790120	93790331	+	29.37	Ancient
XLOC_000918	linc-TMED5-1	TCONS_00001585	lincRNA	chr1	93776964	93804222	-	27259	891	MIDDLE	4	chr1	93802934	93803069	136	113	83.0882	12.6824	56.6779	15	SPL	MIR	SINE/MIR	chr1	93802957	93803078	+	27.84	Ancient
XLOC_000918	linc-TMED5-1	TCONS_00001585	lincRNA	chr1	93776964	93804222	-	27259	891	MIDDLE	3	chr1	93791326	93791452	127	51	40.1575	5.72391	56.6779	15	SPL	AluSz	SINE/Alu	chr1	93791080	93791376	-	12.11	LineageSpe
XLOC_000918	linc-TMED5-1	TCONS_00001585	lincRNA	chr1	93776964	93804222	-	27259	891	LAST	1	chr1	93776964	93777165	202	13	6.43564	1.45903	56.6779	15	SPL	L1M1	LINE/L1	chr1	93777153	93777896	+	16.76	Ancient
XLOC_000918	linc-TMED5-1	TCONS_00001585	lincRNA	chr1	93776964	93804222	-	27259	891	LAST	1	chr1	93776964	93777165	202	188	93.0693	21.0999	56.6779	15	PolyA	L1M1	LINE/L1	chr1	93776591	93777151	+	16.76	Ancient
XLOC_000918	linc-TMED5-1	TCONS_00001586	lincRNA	chr1	93791325	93806055	-	14731	2278	MIDDLE	3	chr1	93804914	93805093	180	89	49.4444	3.90694	37.0939	15	SPL	MLT1H	LTR/ERVL-MaLR	chr1	93805005	93805156	+	26.7	Ancient
XLOC_000918	linc-TMED5-1	TCONS_00001586	lincRNA	chr1	93791325	93806055	-	14731	2278	LAST	1	chr1	93791325	93791452	128	52	40.625	2.2827	37.0939	15	PolyA	AluSz	SINE/Alu	chr1	93791080	93791376	-	12.11	LineageSpe
XLOC_000918	linc-TMED5-1	TCONS_00001586	lincRNA	chr1	93791325	93806055	-	14731	2278	MIDDLE	2	chr1	93802934	93804831	1898	70	3.68809	3.07287	37.0939	15	exonized	MLT1H	LTR/ERVL-MaLR	chr1	93804178	93804247	+	26.7	Ancient
XLOC_000918	linc-TMED5-1	TCONS_00001586	lincRNA	chr1	93791325	93806055	-	14731	2278	MIDDLE	2	chr1	93802934	93804831	1898	238	12.5395	10.4478	37.0939	15	exonized	AluJr	SINE/Alu	chr1	93803417	93803654	-	16.75	LineageSpe
XLOC_000918	linc-TMED5-1	TCONS_00001586	lincRNA	chr1	93791325	93806055	-	14731	2278	MIDDLE	2	chr1	93802934	93804831	1898	122	6.42782	5.35558	37.0939	15	exonized	MIR	SINE/MIR	chr1	93802957	93803078	+	27.84	Ancient
XLOC_000918	linc-TMED5-1	TCONS_00001586	lincRNA	chr1	93791325	93806055	-	14731	2278	MIDDLE	2	chr1	93802934	93804831	1898	274	14.4362	12.0281	37.0939	15	SPL	L2b	LINE/L2	chr1	93804558	93804875	+	32.38	Ancient
XLOC_000918	linc-TMED5-1	TCONS_00001587	lincRNA	chr1	93792165	93806036	-	13872	2186	MIDDLE	3	chr1	93804914	93805093	180	89	49.4444	4.07136	38.3349	15	SPL	MLT1H	LTR/ERVL-MaLR	chr1	93805005	93805156	+	26.7	Ancient
XLOC_000918	linc-TMED5-1	TCONS_00001587	lincRNA	chr1	93792165	93806036	-	13872	2186	LAST	1	chr1	93792165	93792219	55	45	81.8182	2.05855	38.3349	15	PolyA	L2	LINE/L2	chr1	93791964	93792209	-	32.38	Ancient
XLOC_000918	linc-TMED5-1	TCONS_00001587	lincRNA	chr1	93792165	93806036	-	13872	2186	MIDDLE	2	chr1	93802934	93804831	1898	70	3.68809	3.2022	38.3349	15	exonized	MLT1H	LTR/ERVL-MaLR	chr1	93804178	93804247	+	26.7	Ancient
XLOC_000918	linc-TMED5-1	TCONS_00001587	lincRNA	chr1	93792165	93806036	-	13872	2186	MIDDLE	2	chr1	93802934	93804831	1898	238	12.5395	10.8875	38.3349	15	exonized	AluJr	SINE/Alu	chr1	93803417	93803654	-	16.75	LineageSpe
XLOC_000918	linc-TMED5-1	TCONS_00001587	lincRNA	chr1	93792165	93806036	-	13872	2186	MIDDLE	2	chr1	93802934	93804831	1898	122	6.42782	5.58097	38.3349	15	exonized	MIR	SINE/MIR	chr1	93802957	93803078	+	27.84	Ancient
XLOC_000918	linc-TMED5-1	TCONS_00001587	lincRNA	chr1	93792165	93806036	-	13872	2186	MIDDLE	2	chr1	93802934	93804831	1898	274	14.4362	12.5343	38.3349	15	SPL	L2b	LINE/L2	chr1	93804558	93804875	+	32.38	Ancient
XLOC_000918	linc-TMED5-1	TCONS_00001588	lincRNA	chr1	93802949	93811306	-	8358	1456	MIDDLE	3	chr1	93804914	93805093	180	89	49.4444	6.11264	37.5	15	SPL	MLT1H	LTR/ERVL-MaLR	chr1	93805005	93805156	+	26.7	Ancient
XLOC_000918	linc-TMED5-1	TCONS_00001588	lincRNA	chr1	93802949	93811306	-	8358	1456	LAST	1	chr1	93802949	93803069	121	113	93.3884	7.76099	37.5	15	SPL	MIR	SINE/MIR	chr1	93802957	93803078	+	27.84	Ancient
XLOC_000918	linc-TMED5-1	TCONS_00001588	lincRNA	chr1	93802949	93811306	-	8358	1456	MIDDLE	2	chr1	93803787	93804831	1045	70	6.69856	4.80769	37.5	15	exonized	MLT1H	LTR/ERVL-MaLR	chr1	93804178	93804247	+	26.7	Ancient
XLOC_000918	linc-TMED5-1	TCONS_00001588	lincRNA	chr1	93802949	93811306	-	8358	1456	MIDDLE	2	chr1	93803787	93804831	1045	274	26.2201	18.8187	37.5	15	SPL	L2b	LINE/L2	chr1	93804558	93804875	+	32.38	Ancient
XLOC_000920	linc-ARHGAP29-1	TCONS_00000574	lincRNA	chr1	94784035	94790125	-	6091	592	FIRST	2	chr1	94789963	94790125	163	163	100	27.5338	78.0405	1	TSS_SPL	L4_A_Mam	LINE/RTE-X	chr1	94789850	94790356	-	30.93	Ancient
XLOC_000920	linc-ARHGAP29-1	TCONS_00000574	lincRNA	chr1	94784035	94790125	-	6091	592	LAST	1	chr1	94784035	94784463	429	21	4.8951	3.5473	78.0405	1	PolyA	MIRb	SINE/MIR	chr1	94783934	94784055	-	29.76	Ancient
XLOC_000920	linc-ARHGAP29-1	TCONS_00000574	lincRNA	chr1	94784035	94790125	-	6091	592	LAST	1	chr1	94784035	94784463	429	278	64.8019	46.9595	78.0405	1	SPL	AluJr	SINE/Alu	chr1	94784186	94784483	+	16.75	LineageSpe
XLOC_000921	linc-F3-2	TCONS_00000575	lincRNA	chr1	95051112	95057853	-	6742	2171	FIRST	2	chr1	95056890	95057853	964	273	28.3195	12.5749	12.5749	1	exonized	AluJb	SINE/Alu	chr1	95057079	95057351	-	16.49	LineageSpe
XLOC_000922	linc-F3-4	TCONS_00000576	lincRNA	chr1	95086707	95089740	-	3034	2272	FIRST	2	chr1	95088275	95089740	1466	200	13.6426	8.80282	8.80282	3	SPL	LTR16C	LTR/ERVL	chr1	95088228	95088474	-	28.16	Ancient
XLOC_000922	linc-F3-4	TCONS_00002406	lincRNA	chr1	95082302	95088440	-	6139	492	FIRST	2	chr1	95088275	95088440	166	166	100	33.7398	33.7398	3	TSS_SPL	LTR16C	LTR/ERVL	chr1	95088228	95088474	-	28.16	Ancient
XLOC_000927	linc-ALG14-1	TCONS_00001601	lincRNA	chr1	95781384	95783970	-	2587	470	MIDDLE	2	chr1	95782438	95782493	56	56	100	11.9149	46.8085	3	Both_SPL	LFSINE_Vert	SINE/tRNA	chr1	95782436	95782508	+	31.21	Ancient
XLOC_000927	linc-ALG14-1	TCONS_00001601	lincRNA	chr1	95781384	95783970	-	2587	470	MIDDLE	2	chr1	95782438	95782493	56	17	30.3571	3.61702	46.8085	3	SPL	MIR	SINE/MIR	chr1	95782477	95782671	-	27.84	Ancient
XLOC_000927	linc-ALG14-1	TCONS_00001601	lincRNA	chr1	95781384	95783970	-	2587	470	LAST	1	chr1	95781384	95781530	147	111	75.5102	23.617	46.8085	3	SPL	L2a	LINE/L2	chr1	95781420	95781804	+	29.37	Ancient
XLOC_000927	linc-ALG14-1	TCONS_00001601	lincRNA	chr1	95781384	95783970	-	2587	470	LAST	1	chr1	95781384	95781530	147	36	24.4898	7.65957	46.8085	3	PolyA	MER58A	DNA/hAT-Charlie	chr1	95781202	95781419	-	22.89	Ancient
XLOC_000927	linc-ALG14-1	TCONS_00002410	lincRNA	chr1	95781345	95783539	-	2195	315	MIDDLE	2	chr1	95782438	95782493	56	56	100	17.7778	82.2222	3	Both_SPL	LFSINE_Vert	SINE/tRNA	chr1	95782436	95782508	+	31.21	Ancient
XLOC_000927	linc-ALG14-1	TCONS_00002410	lincRNA	chr1	95781345	95783539	-	2195	315	MIDDLE	2	chr1	95782438	95782493	56	17	30.3571	5.39683	82.2222	3	SPL	MIR	SINE/MIR	chr1	95782477	95782671	-	27.84	Ancient
XLOC_000927	linc-ALG14-1	TCONS_00002410	lincRNA	chr1	95781345	95783539	-	2195	315	LAST	1	chr1	95781345	95781530	186	111	59.6774	35.2381	82.2222	3	SPL	L2a	LINE/L2	chr1	95781420	95781804	+	29.37	Ancient
XLOC_000927	linc-ALG14-1	TCONS_00002410	lincRNA	chr1	95781345	95783539	-	2195	315	LAST	1	chr1	95781345	95781530	186	75	40.3226	23.8095	82.2222	3	PolyA	MER58A	DNA/hAT-Charlie	chr1	95781202	95781419	-	22.89	Ancient
XLOC_000928	linc-ALG14-3	TCONS_00000584	lincRNA	chr1	95816807	95817810	-	1004	602	FIRST	2	chr1	95817588	95817810	223	64	28.6996	10.6312	35.0498	1	SPL	LTR85c	LTR/Gypsy?	chr1	95817348	95817651	-	30.76	Ancient
XLOC_000928	linc-ALG14-3	TCONS_00000584	lincRNA	chr1	95816807	95817810	-	1004	602	LAST	1	chr1	95816807	95817185	379	23	6.0686	3.8206	35.0498	1	SPL	LTR85c	LTR/Gypsy?	chr1	95817163	95817249	-	30.76	Ancient
XLOC_000928	linc-ALG14-3	TCONS_00000584	lincRNA	chr1	95816807	95817810	-	1004	602	LAST	1	chr1	95816807	95817185	379	124	32.7177	20.598	35.0498	1	PolyA	MIRb	SINE/MIR	chr1	95816726	95816930	+	29.76	Ancient
XLOC_000929	linc-ALG14-2	TCONS_00000092	lincRNA	chr1	95820945	95846556	-	25612	1643	LAST	1	chr1	95820945	95822033	1089	119	10.9275	7.24285	35.3621	1	PolyA	L1ME3Cz	LINE/L1	chr1	95820934	95821063	-	26.99	Ancient
XLOC_000929	linc-ALG14-2	TCONS_00000092	lincRNA	chr1	95820945	95846556	-	25612	1643	FIRST	3	chr1	95846188	95846556	369	369	100	22.4589	35.3621	1	TSS_SPL	MLT2A2	LTR/ERVL	chr1	95846102	95846659	-	14.02	LineageSpe
XLOC_000929	linc-ALG14-2	TCONS_00000092	lincRNA	chr1	95820945	95846556	-	25612	1643	LAST	1	chr1	95820945	95822033	1089	93	8.53994	5.66038	35.3621	1	SPL	Charlie16a	DNA/hAT-Charlie	chr1	95821941	95822103	-	27.55	Ancient
XLOC_000930	linc-ALG14-4	TCONS_00000585	lincRNA	chr1	96719625	96839681	-	120057	1994	FIRST	6	chr1	96839638	96839681	44	44	100	2.20662	53.9619	1	TSS_SPL	LTR40A1	LTR/ERVL	chr1	96839513	96839882	+	26.62	Ancient
XLOC_000930	linc-ALG14-4	TCONS_00000585	lincRNA	chr1	96719625	96839681	-	120057	1994	LAST	1	chr1	96719625	96721306	1682	44	2.61593	2.20662	53.9619	1	exonized	L1MB2	LINE/L1	chr1	96720851	96720894	-	18.49	Ancient
XLOC_000930	linc-ALG14-4	TCONS_00000585	lincRNA	chr1	96719625	96839681	-	120057	1994	MIDDLE	4	chr1	96818710	96818788	79	79	100	3.96189	53.9619	1	Both_SPL	L1MEd	LINE/L1	chr1	96818615	96818950	-	28.83	Ancient
XLOC_000930	linc-ALG14-4	TCONS_00000585	lincRNA	chr1	96719625	96839681	-	120057	1994	LAST	1	chr1	96719625	96721306	1682	412	24.4946	20.662	53.9619	1	SPL	L1MB2	LINE/L1	chr1	96720895	96721332	-	18.49	Ancient
XLOC_000930	linc-ALG14-4	TCONS_00000585	lincRNA	chr1	96719625	96839681	-	120057	1994	LAST	1	chr1	96719625	96721306	1682	347	20.6302	17.4022	53.9619	1	exonized	THE1B	LTR/ERVL-MaLR	chr1	96720007	96720353	+	12.8	LineageSpe
XLOC_000930	linc-ALG14-4	TCONS_00000585	lincRNA	chr1	96719625	96839681	-	120057	1994	LAST	1	chr1	96719625	96721306	1682	150	8.91795	7.52257	53.9619	1	exonized	L1PA16	LINE/L1	chr1	96720690	96720839	+	14.52	LineageSpe
XLOC_000932	linc-DPYD-1	TCONS_00001602	lincRNA	chr1	98389797	98394621	-	4825	245	FIRST	2	chr1	98394580	98394621	42	42	100	17.1429	17.1429	1	TSS_SPL	L2a	LINE/L2	chr1	98394292	98394842	+	29.37	Ancient
XLOC_000933	linc-DPYD-2	TCONS_00001603	lincRNA	chr1	98398902	98440557	-	41656	1030	MIDDLE	2	chr1	98407129	98407296	168	168	100	16.3107	38.3495	2	Both_SPL	L1MB7	LINE/L1	chr1	98406869	98407618	-	19.22	Ancient
XLOC_000933	linc-DPYD-2	TCONS_00001603	lincRNA	chr1	98398902	98440557	-	41656	1030	LAST	1	chr1	98398902	98399725	824	227	27.5485	22.0388	38.3495	2	SPL	LFSINE_Vert	SINE/tRNA	chr1	98399499	98399786	+	31.21	Ancient
XLOC_000933	linc-DPYD-2	TCONS_00002412	lincRNA	chr1	98399532	98407226	-	7695	292	FIRST	2	chr1	98407129	98407226	98	98	100	33.5616	100	2	TSS_SPL	L1MB7	LINE/L1	chr1	98406869	98407618	-	19.22	Ancient
[truncated: 27,948 more rows]

## Sheet: Columns
COLUMN EXPLANATIONs
1	GeneID	ID of gene from Cabili et al (2011) set
2	GeneName	Name of gene from Cabili et al (2011) set
[truncated: 28 more rows]
