# Supplementary material for: Transposable Elements Are Major Contributors to the Origin, Diversification, and Regulation of Vertebrate Long Noncoding RNAs
Source: PLoS Genet. 2013 Apr 25;9(4):e1003470. doi: 10.1371/journal.pgen.1003470 (PMC3636048; doi:10.1371/journal.pgen.1003470)
Supplement: Table S11 — Details of TE content of zebrafish lincRNAs. (XLSX) [file pgen.1003470.s016.xlsx]

## Sheet: TableS11
Transposable elements are major contributors to the content, diversification, and regulation of vertebrate long noncoding RNAs
Aurélie Kapusta, Zev Kronenberg, Vincent J. Lynch, Xiaoyu Zhuo, LeeAnn Ramsay, Guillaume Bourque, Mark Yandell & Cédric Feschotte
Supplementary Table 11: TE content of Zebra fish studied set of lincRNAs
Zebrafish, sets are from Pauli et al. (2012) and Ulitsky et al. (2011). To limit redundancy, in case of overlap of exons between transcripts of the two sets, only transcripts from Pauli et al. (2012) were kept.
Repeat Masker Output = danRer7: RM v.329, repbase libraries RB20090604, from UCSC website - corrected for simple fragmentation (see Methods)
1	2	3	4	5	6	7	8	9	10	11	12	13	14	15	16	17	18	19	20	21	22	23	24	25	26	27
From_set	From_set	From_set	From_set	From_set	From_set	From_set	.	.	.	.	From_set	From_set	From_set	.	.	.	.	.	.	.	.	.	.	.	.	.
GeneID	TranscriptID	TranscriptType	TrChr	TrStart	TrEnd	TrStrand	TrLength	TrMatureLen	ExonType	ExonNb	ExChr	ExStart	ExEnd	ExLen	TEoverlapLen	%thisTE-Exon	%thisTE-MatureTr	%ALL-TEs-in-matureTr	TE contribution	TEname	TEclass/fam	TEchr	TEstart	TEend	TEstrand	TE%Div_avg
ID=chr1:-:gene:1022221:1031920;children=UL_001;	UL_001	lincRNA	chr1	1022221	1031920	-	9700	2093	LAST	5	chr1	1022221	1023501	1281	96	7.49415	4.58672	11.1323	exonized	ZFERV-2-I_DR-int	LTR/ERV1	chr1	1022569	1022664	-	19.1
ID=chr1:-:gene:1022221:1031920;children=UL_001;	UL_001	lincRNA	chr1	1022221	1031920	-	9700	2093	LAST	5	chr1	1022221	1023501	1281	121	9.44575	5.78118	11.1323	exonized	ENSPM-6_DR	DNA/En-Spm	chr1	1022540	1022660	+	17.5
ID=chr1:-:gene:1022221:1031920;children=UL_001;	UL_001	lincRNA	chr1	1022221	1031920	-	9700	2093	LAST	5	chr1	1022221	1023501	1281	16	1.24902	0.764453	11.1323	exonized	DNA-X-5_DR	DNA	chr1	1022553	1022568	-	13.5
ID=chr1:-:gene:17832314:17833124;children=Zv9_00001673;	Zv9_00001673	lincRNA	chr1	17832314	17833124	-	811	278	FIRST	1	chr1	17833103	17833124	22	22	100	7.91367	7.91367	TSS_SPL	DNAX-1_DR	DNA	chr1	17832923	17833327	+	16.9
ID=chr1:-:gene:18529334:18530054;children=Zv9_00001697;	Zv9_00001697	lincRNA	chr1	18529334	18530054	-	721	617	LAST	2	chr1	18529334	18529900	567	164	28.9242	26.5802	26.5802	PolyA	TDR18	DNA/hAT-Charlie	chr1	18528936	18529497	-	10.6
ID=chr1:-:gene:25631827:25635826;children=UL_018,UL_017;	UL_017	lincRNA	chr1	25631827	25634542	-	2716	2716	SINGLE	1	chr1	25631827	25634542	2716	63	2.31959	2.31959	2.31959	TSS	HATN10_DR	DNA/hAT	chr1	25634480	25634879	-	12.3
ID=chr1:-:gene:25631827:25635826;children=UL_018,UL_017;	UL_018	lincRNA	chr1	25631827	25635826	-	4000	4000	SINGLE	1	chr1	25631827	25635826	4000	400	10	10	10	exonized	HATN10_DR	DNA/hAT	chr1	25634480	25634879	-	12.3
ID=chr1:-:gene:28599189:28604017;children=UL_019;	UL_019	lincRNA	chr1	28599189	28604017	-	4829	1759	LAST	4	chr1	28599189	28600274	1086	51	4.69613	2.89937	2.89937	exonized	Tc1N1_DR	DNA/En-Spm?	chr1	28599561	28599611	+	13.9
ID=chr1:-:gene:41981738:41991222;children=Zv9_00002091;	Zv9_00002091	lincRNA	chr1	41981738	41991222	-	9485	268	FIRST	1	chr1	41991016	41991222	207	18	8.69565	6.71642	55.9701	TSS	SINE3-1	SINE/5S	chr1	41991205	41991337	-	9.52
ID=chr1:-:gene:41981738:41991222;children=Zv9_00002091;	Zv9_00002091	lincRNA	chr1	41981738	41991222	-	9485	268	FIRST	1	chr1	41991016	41991222	207	132	63.7681	49.2537	55.9701	SPL	SINE3-1	SINE/5S	chr1	41990914	41991147	-	9.52
ID=chr1:-:gene:47323688:47330238;children=UL_023;	UL_023	lincRNA	chr1	47323688	47330238	-	6551	5759	FIRST	1	chr1	47329478	47330238	761	117	15.3745	2.0316	14.447	TSS	HE1_DR1	SINE/V	chr1	47330122	47330282	+	13.2
ID=chr1:-:gene:47323688:47330238;children=UL_023;	UL_023	lincRNA	chr1	47323688	47330238	-	6551	5759	FIRST	1	chr1	47329478	47330238	761	140	18.3968	2.43098	14.447	TSS	DNA-8-14_DR	DNA/hAT-Charlie	chr1	47330099	47330267	-	11.4
ID=chr1:-:gene:47323688:47330238;children=UL_023;	UL_023	lincRNA	chr1	47323688	47330238	-	6551	5759	LAST	2	chr1	47323688	47328685	4998	194	3.88155	3.36864	14.447	exonized	TDR3	DNA/hAT-Charlie	chr1	47324129	47324322	+	16.3
ID=chr1:-:gene:47323688:47330238;children=UL_023;	UL_023	lincRNA	chr1	47323688	47330238	-	6551	5759	LAST	2	chr1	47323688	47328685	4998	94	1.88075	1.63223	14.447	exonized	TDR19	DNA/hAT	chr1	47324248	47324341	-	19.4
ID=chr1:-:gene:47323688:47330238;children=UL_023;	UL_023	lincRNA	chr1	47323688	47330238	-	6551	5759	LAST	2	chr1	47323688	47328685	4998	287	5.7423	4.9835	14.447	exonized	HE1_DR1	SINE/V	chr1	47324401	47324687	-	13.2
ID=chr1:-:gene:51417706:51428693;children=Zv9_00002264;	Zv9_00002264	lincRNA	chr1	51417706	51428693	-	10988	264	LAST	2	chr1	51417706	51417790	85	85	100	32.197	32.197	PolyA_SPL	TDR13	DNA	chr1	51417530	51417955	+	15.4
ID=chr1:-:gene:55294972:55300704;children=UL_028;	UL_028	lincRNA	chr1	55294972	55300704	-	5733	5733	SINGLE	1	chr1	55294972	55300704	5733	487	8.49468	8.49468	49.2761	exonized	Tc1N1_DR	DNA/En-Spm?	chr1	55299206	55299692	+	13.9
ID=chr1:-:gene:55294972:55300704;children=UL_028;	UL_028	lincRNA	chr1	55294972	55300704	-	5733	5733	SINGLE	1	chr1	55294972	55300704	5733	61	1.06402	1.06402	49.2761	TSS	TE-X-4_DR	Unknown	chr1	55300644	55300765	+	17.1
ID=chr1:-:gene:55294972:55300704;children=UL_028;	UL_028	lincRNA	chr1	55294972	55300704	-	5733	5733	SINGLE	1	chr1	55294972	55300704	5733	46	0.802372	0.802372	49.2761	TSS	TDR18	DNA/hAT-Charlie	chr1	55300659	55301192	+	10.6
ID=chr1:-:gene:55294972:55300704;children=UL_028;	UL_028	lincRNA	chr1	55294972	55300704	-	5733	5733	SINGLE	1	chr1	55294972	55300704	5733	412	7.18646	7.18646	49.2761	exonized	HATN7_DR	DNA/hAT	chr1	55298550	55298961	+	12.7
ID=chr1:-:gene:55294972:55300704;children=UL_028;	UL_028	lincRNA	chr1	55294972	55300704	-	5733	5733	SINGLE	1	chr1	55294972	55300704	5733	150	2.61643	2.61643	49.2761	exonized	DNA-1-6_DR	DNA	chr1	55300211	55300360	-	16.8
ID=chr1:-:gene:55294972:55300704;children=UL_028;	UL_028	lincRNA	chr1	55294972	55300704	-	5733	5733	SINGLE	1	chr1	55294972	55300704	5733	207	3.61068	3.61068	49.2761	exonized	ANGEL	DNA/hAT	chr1	55297840	55298046	-	17.6
ID=chr1:-:gene:55294972:55300704;children=UL_028;	UL_028	lincRNA	chr1	55294972	55300704	-	5733	5733	SINGLE	1	chr1	55294972	55300704	5733	151	2.63387	2.63387	49.2761	exonized	ANGEL	DNA/hAT	chr1	55297698	55297848	-	17.6
ID=chr1:-:gene:55294972:55300704;children=UL_028;	UL_028	lincRNA	chr1	55294972	55300704	-	5733	5733	SINGLE	1	chr1	55294972	55300704	5733	173	3.01762	3.01762	49.2761	exonized	ANGEL	DNA/hAT	chr1	55297537	55297709	-	17.6
ID=chr1:-:gene:55294972:55300704;children=UL_028;	UL_028	lincRNA	chr1	55294972	55300704	-	5733	5733	SINGLE	1	chr1	55294972	55300704	5733	217	3.7851	3.7851	49.2761	exonized	ANGEL	DNA/hAT	chr1	55297323	55297539	+	17.6
ID=chr1:-:gene:55294972:55300704;children=UL_028;	UL_028	lincRNA	chr1	55294972	55300704	-	5733	5733	SINGLE	1	chr1	55294972	55300704	5733	202	3.52346	3.52346	49.2761	exonized	ANGEL	DNA/hAT	chr1	55297161	55297362	-	17.6
ID=chr1:-:gene:55294972:55300704;children=UL_028;	UL_028	lincRNA	chr1	55294972	55300704	-	5733	5733	SINGLE	1	chr1	55294972	55300704	5733	70	1.221	1.221	49.2761	exonized	ANGEL	DNA/hAT	chr1	55297092	55297161	-	17.6
ID=chr1:-:gene:55294972:55300704;children=UL_028;	UL_028	lincRNA	chr1	55294972	55300704	-	5733	5733	SINGLE	1	chr1	55294972	55300704	5733	124	2.16292	2.16292	49.2761	exonized	ANGEL	DNA/hAT	chr1	55296969	55297092	-	17.6
ID=chr1:-:gene:55294972:55300704;children=UL_028;	UL_028	lincRNA	chr1	55294972	55300704	-	5733	5733	SINGLE	1	chr1	55294972	55300704	5733	193	3.36647	3.36647	49.2761	exonized	ANGEL	DNA/hAT	chr1	55296052	55296244	-	17.6
ID=chr1:-:gene:55294972:55300704;children=UL_028;	UL_028	lincRNA	chr1	55294972	55300704	-	5733	5733	SINGLE	1	chr1	55294972	55300704	5733	178	3.10483	3.10483	49.2761	exonized	ANGEL	DNA/hAT	chr1	55295877	55296054	-	17.6
ID=chr1:-:gene:55294972:55300704;children=UL_028;	UL_028	lincRNA	chr1	55294972	55300704	-	5733	5733	SINGLE	1	chr1	55294972	55300704	5733	154	2.6862	2.6862	49.2761	exonized	ANGEL	DNA/hAT	chr1	55295795	55295948	+	17.6
ID=chr1:-:gene:60302477:60303236;children=Zv9_00002559;	Zv9_00002559	lincRNA	chr1	60302477	60303236	-	760	518	LAST	3	chr1	60302477	60302727	251	22	8.76494	4.2471	4.2471	PolyA	Kolobok-N5_DR	DNA/Kolobok?	chr1	60302437	60302498	-	14.6
ID=chr1:-:gene:6759580:6761688;children=Zv9_00001432;	Zv9_00001432	lincRNA	chr1	6759580	6761688	-	2109	1662	FIRST	1	chr1	6761416	6761688	273	94	34.4322	5.65584	43.3815	TSS	Kolobok-N4_DR	DNA/Kolobok	chr1	6761595	6761856	-	18.7
ID=chr1:-:gene:6759580:6761688;children=Zv9_00001432;	Zv9_00001432	lincRNA	chr1	6759580	6761688	-	2109	1662	FIRST	1	chr1	6761416	6761688	273	24	8.79121	1.44404	43.3815	SPL	Kolobok-N4_DR	DNA/Kolobok	chr1	6761151	6761439	+	18.7
ID=chr1:-:gene:6759580:6761688;children=Zv9_00001432;	Zv9_00001432	lincRNA	chr1	6759580	6761688	-	2109	1662	FIRST	1	chr1	6761416	6761688	273	193	70.696	11.6125	43.3815	exonized	ANGEL	DNA/hAT	chr1	6761445	6761637	-	17.6
ID=chr1:-:gene:6759580:6761688;children=Zv9_00001432;	Zv9_00001432	lincRNA	chr1	6759580	6761688	-	2109	1662	LAST	2	chr1	6759580	6760968	1389	185	13.3189	11.1312	43.3815	exonized	SINE2-1_DR	SINE/tRNA	chr1	6759817	6760001	-	19.1
ID=chr1:-:gene:6759580:6761688;children=Zv9_00001432;	Zv9_00001432	lincRNA	chr1	6759580	6761688	-	2109	1662	LAST	2	chr1	6759580	6760968	1389	225	16.1987	13.5379	43.3815	PolyA	EXPANDER1_DR	LINE/RTE	chr1	6759098	6759804	+	12.1
ID=chr1:-:gene:7582506:7585235;children=Zv9_00001440;	Zv9_00001440	lincRNA	chr1	7582506	7585235	-	2730	1068	LAST	2	chr1	7582506	7583308	803	329	40.9714	30.8052	47.9401	PolyA	Kolobok-N2A_DR	DNA/Kolobok	chr1	7582013	7582834	-	13.9
ID=chr1:-:gene:7582506:7585235;children=Zv9_00001440;	Zv9_00001440	lincRNA	chr1	7582506	7585235	-	2730	1068	LAST	2	chr1	7582506	7583308	803	183	22.7895	17.1348	47.9401	exonized	HATN6_DR	DNA/hAT-Ac	chr1	7582836	7583018	+	13.7
ID=chr1:-:gene:9848104:9858252;children=UL_008;	UL_008	lincRNA	chr1	9848104	9858252	-	10149	2062	LAST	5	chr1	9848104	9849267	1164	58	4.98282	2.8128	34.8206	exonized	hAT-N66B_DR	DNA/hAT-Charlie	chr1	9848717	9848774	-	10.7
ID=chr1:-:gene:9848104:9858252;children=UL_008;	UL_008	lincRNA	chr1	9848104	9858252	-	10149	2062	LAST	5	chr1	9848104	9849267	1164	169	14.5189	8.19593	34.8206	exonized	HarbingerN6_DR	DNA/Harbinger	chr1	9848772	9848940	+	14.9
ID=chr1:-:gene:9848104:9858252;children=UL_008;	UL_008	lincRNA	chr1	9848104	9858252	-	10149	2062	LAST	5	chr1	9848104	9849267	1164	122	10.4811	5.91659	34.8206	exonized	Harbinger-N10_DR	DNA/Harbinger	chr1	9848941	9849062	+	13.3
ID=chr1:-:gene:9848104:9858252;children=UL_008;	UL_008	lincRNA	chr1	9848104	9858252	-	10149	2062	LAST	5	chr1	9848104	9849267	1164	354	30.4124	17.1678	34.8206	exonized	HE1_DR1	SINE/V	chr1	9848351	9848704	+	13.2
ID=chr1:-:gene:9848104:9858252;children=UL_008;	UL_008	lincRNA	chr1	9848104	9858252	-	10149	2062	LAST	5	chr1	9848104	9849267	1164	15	1.28866	0.727449	34.8206	exonized	DNA-2-18_DR	DNA/En-Spm?	chr1	9849063	9849077	-	16.2
ID=chr1:+:gene:11221227:11224948;children=UL_009;	UL_009	lincRNA	chr1	11221227	11224948	+	3722	2538	LAST	2	chr1	11222908	11224948	2041	133	6.51641	5.24035	26.4775	exonized	DNA-8-9_DR	DNA/hAT-Ac?	chr1	11224724	11224856	-	18.1
ID=chr1:+:gene:11221227:11224948;children=UL_009;	UL_009	lincRNA	chr1	11221227	11224948	+	3722	2538	LAST	2	chr1	11222908	11224948	2041	216	10.583	8.51064	26.4775	exonized	DNA-8-9_DR	DNA/hAT-Ac?	chr1	11224467	11224682	-	18.1
ID=chr1:+:gene:11221227:11224948;children=UL_009;	UL_009	lincRNA	chr1	11221227	11224948	+	3722	2538	LAST	2	chr1	11222908	11224948	2041	323	15.8256	12.7266	26.4775	exonized	DNA-8-28_DR	DNA/P?	chr1	11224147	11224469	+	16.2
ID=chr1:+:gene:19692950:19693790;children=UL_014;	UL_014	lincRNA	chr1	19692950	19693790	+	841	841	SINGLE	1	chr1	19692950	19693790	841	96	11.415	11.415	89.2985	exonized	TDR7	DNA	chr1	19693593	19693688	-	12.5
ID=chr1:+:gene:19692950:19693790;children=UL_014;	UL_014	lincRNA	chr1	19692950	19693790	+	841	841	SINGLE	1	chr1	19692950	19693790	841	230	27.3484	27.3484	89.2985	exonized	TDR7	DNA	chr1	19693279	19693508	-	12.5
ID=chr1:+:gene:19692950:19693790;children=UL_014;	UL_014	lincRNA	chr1	19692950	19693790	+	841	841	SINGLE	1	chr1	19692950	19693790	841	213	25.327	25.327	89.2985	exonized	HE1_DR1	SINE/V	chr1	19692977	19693189	-	13.2
ID=chr1:+:gene:19692950:19693790;children=UL_014;	UL_014	lincRNA	chr1	19692950	19693790	+	841	841	SINGLE	1	chr1	19692950	19693790	841	212	25.2081	25.2081	89.2985	exonized	DNA-8-9_DR	DNA/hAT-Ac?	chr1	19693001	19693212	+	18.1
ID=chr1:+:gene:22263205:22280612;children=UL_015;	UL_015	lincRNA	chr1	22263205	22280612	+	17408	3667	FIRST	1	chr1	22263205	22263454	250	18	7.2	0.490864	0.490864	TSS	MuDR-N1_DR	DNA/MuDR	chr1	22262436	22263222	-	10.9
ID=chr1:+:gene:40911859:40912963;children=UL_020;	UL_020	lincRNA	chr1	40911859	40912963	+	1105	1105	SINGLE	1	chr1	40911859	40912963	1105	172	15.5656	15.5656	15.5656	exonized	hAT-N66B_DR	DNA/hAT-Charlie	chr1	40912781	40912952	-	10.7
ID=chr1:+:gene:44419275:44422641;children=UL_021;	UL_021	lincRNA	chr1	44419275	44422641	+	3367	3367	SINGLE	1	chr1	44419275	44422641	3367	722	21.4434	21.4434	50.8465	exonized	TDR2	DNA/TcMar-Tc1	chr1	44421443	44422164	+	8.1
ID=chr1:+:gene:44419275:44422641;children=UL_021;	UL_021	lincRNA	chr1	44419275	44422641	+	3367	3367	SINGLE	1	chr1	44419275	44422641	3367	232	6.89041	6.89041	50.8465	exonized	TDR12	DNA	chr1	44422270	44422501	-	10.6
ID=chr1:+:gene:44419275:44422641;children=UL_021;	UL_021	lincRNA	chr1	44419275	44422641	+	3367	3367	SINGLE	1	chr1	44419275	44422641	3367	55	1.6335	1.6335	50.8465	exonized	DNA-X-4_DR	DNA	chr1	44421011	44421065	-	11.4
ID=chr1:+:gene:44419275:44422641;children=UL_021;	UL_021	lincRNA	chr1	44419275	44422641	+	3367	3367	SINGLE	1	chr1	44419275	44422641	3367	340	10.098	10.098	50.8465	exonized	DNA-X-4_DR	DNA	chr1	44420312	44420651	-	11.4
ID=chr1:+:gene:44419275:44422641;children=UL_021;	UL_021	lincRNA	chr1	44419275	44422641	+	3367	3367	SINGLE	1	chr1	44419275	44422641	3367	94	2.7918	2.7918	50.8465	exonized	DNA-1-3_DR	DNA	chr1	44420917	44421010	+	15.9
ID=chr1:+:gene:44419275:44422641;children=UL_021;	UL_021	lincRNA	chr1	44419275	44422641	+	3367	3367	SINGLE	1	chr1	44419275	44422641	3367	269	7.98931	7.98931	50.8465	exonized	DNA-1-3B_DR	DNA	chr1	44420653	44420921	+	16.1
ID=chr1:+:gene:52188703:52211167;children=Zv9_00001024;	Zv9_00001024	lincRNA	chr1	52188703	52211167	+	22465	1162	FIRST	1	chr1	52188703	52188773	71	19	26.7606	1.63511	52.5818	TSS	DNA-X-2B_DR	DNA	chr1	52188301	52188721	+	12.7
ID=chr1:+:gene:52188703:52211167;children=Zv9_00001024;	Zv9_00001024	lincRNA	chr1	52188703	52211167	+	22465	1162	LAST	3	chr1	52210192	52211167	976	592	60.6557	50.9466	52.5818	PolyA	TC1DR2	DNA/TcMar-Tc1	chr1	52210576	52211342	-	11.8
ID=chr1:+:gene:52246930:52319761;children=UL_026;	UL_026	lincRNA	chr1	52246930	52319761	+	72832	925	FIRST	1	chr1	52246930	52247314	385	88	22.8571	9.51351	9.51351	TSS	DNA-4-4_DR	DNA	chr1	52246634	52247017	-	9.5
ID=chr1:+:gene:53762852:53773979;children=Zv9_00001081;	Zv9_00001081	lincRNA	chr1	53762852	53773979	+	11128	2542	LAST	2	chr1	53771699	53773979	2281	50	2.19202	1.96696	23.8788	exonized	LOOPERN6_DR	DNA/PiggyBac	chr1	53772526	53772575	-	14.3
ID=chr1:+:gene:53762852:53773979;children=Zv9_00001081;	Zv9_00001081	lincRNA	chr1	53762852	53773979	+	11128	2542	LAST	2	chr1	53771699	53773979	2281	557	24.4191	21.9119	23.8788	PolyA	DNA-AT-3_DR	DNA	chr1	53773423	53774190	+	19.1
ID=chr1:+:gene:54730251:54732305;children=UL_027;	UL_027	lincRNA	chr1	54730251	54732305	+	2055	2055	SINGLE	1	chr1	54730251	54732305	2055	51	2.48175	2.48175	2.48175	exonized	hAT-N53_DR	DNA/hAT?	chr1	54732052	54732102	+	15.5
ID=chr1:+:gene:57794198:57805935;children=Zv9_00001205,Zv9_00001206,Zv9_00001204,Zv9_00001203;	Zv9_00001203	lincRNA	chr1	57794198	57805935	+	11738	1327	MIDDLE	2	chr1	57804067	57804196	130	59	45.3846	4.44612	51.997	SPL	DNA9NNN1_DR	DNA	chr1	57804138	57804355	+	13.9
ID=chr1:+:gene:57794198:57805935;children=Zv9_00001205,Zv9_00001206,Zv9_00001204,Zv9_00001203;	Zv9_00001203	lincRNA	chr1	57794198	57805935	+	11738	1327	LAST	3	chr1	57804892	57805935	1044	453	43.3908	34.1372	51.997	exonized	Gypsy101-LTRb_DR	LTR/Gypsy	chr1	57805305	57805757	+	13.4
ID=chr1:+:gene:57794198:57805935;children=Zv9_00001205,Zv9_00001206,Zv9_00001204,Zv9_00001203;	Zv9_00001203	lincRNA	chr1	57794198	57805935	+	11738	1327	LAST	3	chr1	57804892	57805935	1044	178	17.0498	13.4137	51.997	PolyA	DNA8-4B_DR	DNA/hAT-Charlie	chr1	57805758	57806077	-	5
ID=chr1:+:gene:57794198:57805935;children=Zv9_00001205,Zv9_00001206,Zv9_00001204,Zv9_00001203;	Zv9_00001204	lincRNA	chr1	57794515	57805935	+	11421	1121	FIRST	1	chr1	57794515	57794591	77	61	79.2208	5.44157	61.7306	SPL	DNA9NNN1_DR	DNA	chr1	57794531	57794750	+	13.9
ID=chr1:+:gene:57794198:57805935;children=Zv9_00001205,Zv9_00001206,Zv9_00001204,Zv9_00001203;	Zv9_00001204	lincRNA	chr1	57794515	57805935	+	11421	1121	LAST	2	chr1	57804892	57805935	1044	453	43.3908	40.4103	61.7306	exonized	Gypsy101-LTRb_DR	LTR/Gypsy	chr1	57805305	57805757	+	13.4
ID=chr1:+:gene:57794198:57805935;children=Zv9_00001205,Zv9_00001206,Zv9_00001204,Zv9_00001203;	Zv9_00001204	lincRNA	chr1	57794515	57805935	+	11421	1121	LAST	2	chr1	57804892	57805935	1044	178	17.0498	15.8787	61.7306	PolyA	DNA8-4B_DR	DNA/hAT-Charlie	chr1	57805758	57806077	-	5
ID=chr1:+:gene:57794198:57805935;children=Zv9_00001205,Zv9_00001206,Zv9_00001204,Zv9_00001203;	Zv9_00001205	lincRNA	chr1	57803846	57805935	+	2090	1286	MIDDLE	2	chr1	57804067	57804196	130	59	45.3846	4.58787	53.6547	SPL	DNA9NNN1_DR	DNA	chr1	57804138	57804355	+	13.9
ID=chr1:+:gene:57794198:57805935;children=Zv9_00001205,Zv9_00001206,Zv9_00001204,Zv9_00001203;	Zv9_00001205	lincRNA	chr1	57803846	57805935	+	2090	1286	LAST	3	chr1	57804892	57805935	1044	453	43.3908	35.2255	53.6547	exonized	Gypsy101-LTRb_DR	LTR/Gypsy	chr1	57805305	57805757	+	13.4
ID=chr1:+:gene:57794198:57805935;children=Zv9_00001205,Zv9_00001206,Zv9_00001204,Zv9_00001203;	Zv9_00001205	lincRNA	chr1	57803846	57805935	+	2090	1286	LAST	3	chr1	57804892	57805935	1044	178	17.0498	13.8414	53.6547	PolyA	DNA8-4B_DR	DNA/hAT-Charlie	chr1	57805758	57806077	-	5
ID=chr1:+:gene:57794198:57805935;children=Zv9_00001205,Zv9_00001206,Zv9_00001204,Zv9_00001203;	Zv9_00001206	lincRNA	chr1	57803944	57805935	+	1992	1297	FIRST	1	chr1	57803944	57804196	253	59	23.3202	4.54896	53.1997	SPL	DNA9NNN1_DR	DNA	chr1	57804138	57804355	+	13.9
ID=chr1:+:gene:57794198:57805935;children=Zv9_00001205,Zv9_00001206,Zv9_00001204,Zv9_00001203;	Zv9_00001206	lincRNA	chr1	57803944	57805935	+	1992	1297	LAST	2	chr1	57804892	57805935	1044	453	43.3908	34.9268	53.1997	exonized	Gypsy101-LTRb_DR	LTR/Gypsy	chr1	57805305	57805757	+	13.4
ID=chr1:+:gene:57794198:57805935;children=Zv9_00001205,Zv9_00001206,Zv9_00001204,Zv9_00001203;	Zv9_00001206	lincRNA	chr1	57803944	57805935	+	1992	1297	LAST	2	chr1	57804892	57805935	1044	178	17.0498	13.724	53.1997	PolyA	DNA8-4B_DR	DNA/hAT-Charlie	chr1	57805758	57806077	-	5
ID=chr1:+:gene:8026958:8042023;children=Zv9_00000197,Zv9_00000198;	Zv9_00000197	lincRNA	chr1	8026958	8042023	+	15066	3008	FIRST	1	chr1	8026958	8027020	63	62	98.4127	2.06117	34.5745	TSS	HE1_DR1	SINE/V	chr1	8026946	8027019	-	13.2
ID=chr1:+:gene:8026958:8042023;children=Zv9_00000197,Zv9_00000198;	Zv9_00000197	lincRNA	chr1	8026958	8042023	+	15066	3008	FIRST	1	chr1	8026958	8027020	63	43	68.254	1.42952	34.5745	SPL	DIRS-1-LTR_DR	LTR/DIRS	chr1	8026978	8027025	-	15.4
ID=chr1:+:gene:8026958:8042023;children=Zv9_00000197,Zv9_00000198;	Zv9_00000197	lincRNA	chr1	8026958	8042023	+	15066	3008	LAST	3	chr1	8039225	8042023	2799	153	5.46624	5.08644	34.5745	exonized	hAT-N53_DR	DNA/hAT?	chr1	8040873	8041025	-	15.5
ID=chr1:+:gene:8026958:8042023;children=Zv9_00000197,Zv9_00000198;	Zv9_00000197	lincRNA	chr1	8026958	8042023	+	15066	3008	LAST	3	chr1	8039225	8042023	2799	244	8.7174	8.1117	34.5745	exonized	hAT-N53_DR	DNA/hAT?	chr1	8040552	8040795	-	15.5
ID=chr1:+:gene:8026958:8042023;children=Zv9_00000197,Zv9_00000198;	Zv9_00000197	lincRNA	chr1	8026958	8042023	+	15066	3008	LAST	3	chr1	8039225	8042023	2799	475	16.9703	15.7912	34.5745	exonized	Tc1N1_DR	DNA/En-Spm?	chr1	8039900	8040374	-	13.9
ID=chr1:+:gene:8026958:8042023;children=Zv9_00000197,Zv9_00000198;	Zv9_00000197	lincRNA	chr1	8026958	8042023	+	15066	3008	LAST	3	chr1	8039225	8042023	2799	63	2.2508	2.09441	34.5745	exonized	CR1-2_DR	LINE/L2	chr1	8041530	8041592	+	9.9
ID=chr1:+:gene:8026958:8042023;children=Zv9_00000197,Zv9_00000198;	Zv9_00000198	lincRNA	chr1	8026958	8042023	+	15066	3011	FIRST	1	chr1	8026958	8027020	63	62	98.4127	2.05912	34.54	TSS	HE1_DR1	SINE/V	chr1	8026946	8027019	-	13.2
ID=chr1:+:gene:8026958:8042023;children=Zv9_00000197,Zv9_00000198;	Zv9_00000198	lincRNA	chr1	8026958	8042023	+	15066	3011	FIRST	1	chr1	8026958	8027020	63	43	68.254	1.4281	34.54	SPL	DIRS-1-LTR_DR	LTR/DIRS	chr1	8026978	8027025	-	15.4
ID=chr1:+:gene:8026958:8042023;children=Zv9_00000197,Zv9_00000198;	Zv9_00000198	lincRNA	chr1	8026958	8042023	+	15066	3011	LAST	3	chr1	8039222	8042023	2802	153	5.46039	5.08137	34.54	exonized	hAT-N53_DR	DNA/hAT?	chr1	8040873	8041025	-	15.5
ID=chr1:+:gene:8026958:8042023;children=Zv9_00000197,Zv9_00000198;	Zv9_00000198	lincRNA	chr1	8026958	8042023	+	15066	3011	LAST	3	chr1	8039222	8042023	2802	244	8.70807	8.10362	34.54	exonized	hAT-N53_DR	DNA/hAT?	chr1	8040552	8040795	-	15.5
ID=chr1:+:gene:8026958:8042023;children=Zv9_00000197,Zv9_00000198;	Zv9_00000198	lincRNA	chr1	8026958	8042023	+	15066	3011	LAST	3	chr1	8039222	8042023	2802	475	16.9522	15.7755	34.54	exonized	Tc1N1_DR	DNA/En-Spm?	chr1	8039900	8040374	-	13.9
ID=chr1:+:gene:8026958:8042023;children=Zv9_00000197,Zv9_00000198;	Zv9_00000198	lincRNA	chr1	8026958	8042023	+	15066	3011	LAST	3	chr1	8039222	8042023	2802	63	2.24839	2.09233	34.54	exonized	CR1-2_DR	LINE/L2	chr1	8041530	8041592	+	9.9
ID=chr10:-:gene:15965828:15992560;children=Zv9_00025201,Zv9_00025198,Zv9_00025199,Zv9_00025200;	Zv9_00025200	lincRNA	chr10	15968992	15992559	-	23568	1265	LAST	5	chr10	15968992	15969842	851	115	13.5135	9.09091	9.09091	exonized	ANGEL	DNA/hAT	chr10	15969199	15969313	+	17.6
ID=chr10:-:gene:15965828:15992560;children=Zv9_00025201,Zv9_00025198,Zv9_00025199,Zv9_00025200;	Zv9_00025201	lincRNA	chr10	15968992	15992559	-	23568	1394	LAST	6	chr10	15968992	15969842	851	115	13.5135	8.24964	8.24964	exonized	ANGEL	DNA/hAT	chr10	15969199	15969313	+	17.6
ID=chr10:-:gene:20529844:20537212;children=UL_036;	UL_036	lincRNA	chr10	20529844	20537212	-	7369	2659	FIRST	1	chr10	20535115	20537212	2098	368	17.5405	13.8398	28.3189	exonized	HE1_DR1	SINE/V	chr10	20536778	20537145	+	13.2
ID=chr10:-:gene:20529844:20537212;children=UL_036;	UL_036	lincRNA	chr10	20529844	20537212	-	7369	2659	FIRST	1	chr10	20535115	20537212	2098	385	18.3508	14.4791	28.3189	exonized	HATN10_DR	DNA/hAT	chr10	20535948	20536332	+	12.3
ID=chr10:-:gene:22026523:22055954;children=Zv9_00025303;	Zv9_00025303	lincRNA	chr10	22026523	22055954	-	29432	713	FIRST	1	chr10	22055766	22055954	189	21	11.1111	2.9453	2.9453	TSS	ENSPM-2N_DR	DNA/En-Spm	chr10	22055934	22055977	-	15.1
ID=chr10:-:gene:22681368:22691668;children=UL_038;	UL_038	lincRNA	chr10	22681368	22691668	-	10301	3836	LAST	5	chr10	22681368	22684714	3347	71	2.1213	1.85089	37.487	exonized	hAT-N53_DR	DNA/hAT?	chr10	22683407	22683477	-	15.5
ID=chr10:-:gene:22681368:22691668;children=UL_038;	UL_038	lincRNA	chr10	22681368	22691668	-	10301	3836	LAST	5	chr10	22681368	22684714	3347	294	8.78399	7.66423	37.487	exonized	hAT-N47_DR	DNA/hAT	chr10	22682584	22682877	+	9.7
ID=chr10:-:gene:22681368:22691668;children=UL_038;	UL_038	lincRNA	chr10	22681368	22691668	-	10301	3836	LAST	5	chr10	22681368	22684714	3347	135	4.03346	3.51929	37.487	exonized	hAT-N47_DR	DNA/hAT	chr10	22682150	22682284	+	9.7
ID=chr10:-:gene:22681368:22691668;children=UL_038;	UL_038	lincRNA	chr10	22681368	22691668	-	10301	3836	LAST	5	chr10	22681368	22684714	3347	140	4.18285	3.64964	37.487	exonized	HarbingerN2_DR	DNA/Harbinger	chr10	22684221	22684360	-	11.7
ID=chr10:-:gene:22681368:22691668;children=UL_038;	UL_038	lincRNA	chr10	22681368	22691668	-	10301	3836	LAST	5	chr10	22681368	22684714	3347	662	19.7789	17.2576	37.487	exonized	DNAX-1_DR	DNA	chr10	22683478	22684139	+	16.9
ID=chr10:-:gene:22681368:22691668;children=UL_038;	UL_038	lincRNA	chr10	22681368	22691668	-	10301	3836	LAST	5	chr10	22681368	22684714	3347	136	4.06334	3.54536	37.487	exonized	DNA-2-24B_DR	DNA	chr10	22682341	22682476	+	19
ID=chr10:-:gene:27627304:27634989;children=UL_040,UL_041;	UL_041	lincRNA	chr10	27627304	27634989	-	7686	2203	MIDDLE	2	chr10	27632523	27634112	1590	110	6.91824	4.99319	35.4517	exonized	hAT-N32_DR	DNA/hAT-Charlie	chr10	27632880	27632989	+	14.3
ID=chr10:-:gene:27627304:27634989;children=UL_040,UL_041;	UL_041	lincRNA	chr10	27627304	27634989	-	7686	2203	MIDDLE	2	chr10	27632523	27634112	1590	77	4.84277	3.49523	35.4517	exonized	I-1_DR	LINE/I	chr10	27632795	27632871	-	21
ID=chr10:-:gene:27627304:27634989;children=UL_040,UL_041;	UL_041	lincRNA	chr10	27627304	27634989	-	7686	2203	MIDDLE	2	chr10	27632523	27634112	1590	159	10	7.21743	35.4517	exonized	HE1_DR1	SINE/V	chr10	27633492	27633650	+	13.2
ID=chr10:-:gene:27627304:27634989;children=UL_040,UL_041;	UL_041	lincRNA	chr10	27627304	27634989	-	7686	2203	MIDDLE	2	chr10	27632523	27634112	1590	43	2.7044	1.95188	35.4517	exonized	EnSpm-6N1_DR	DNA/En-Spm	chr10	27633455	27633497	-	16.4
ID=chr10:-:gene:27627304:27634989;children=UL_040,UL_041;	UL_041	lincRNA	chr10	27627304	27634989	-	7686	2203	MIDDLE	2	chr10	27632523	27634112	1590	392	24.6541	17.7939	35.4517	exonized	EXPANDER1_DR	LINE/RTE	chr10	27633006	27633397	+	12.1
ID=chr10:-:gene:29869133:29878935;children=Zv9_00025472;	Zv9_00025472	lincRNA	chr10	29869133	29878935	-	9803	1125	LAST	3	chr10	29869133	29869999	867	406	46.8281	36.0889	36.0889	exonized	Tc1N1_DR	DNA/En-Spm?	chr10	29869296	29869701	+	13.9
ID=chr10:-:gene:34222497:34295864;children=Zv9_00025545;	Zv9_00025545	lincRNA	chr10	34222497	34295864	-	73368	1306	FIRST	1	chr10	34295826	34295864	39	39	100	2.98622	53.1394	TSS_SPL	DNA2-3_DR	DNA/hAT?	chr10	34295411	34296521	-	12
ID=chr10:-:gene:34222497:34295864;children=Zv9_00025545;	Zv9_00025545	lincRNA	chr10	34222497	34295864	-	73368	1306	LAST	2	chr10	34222497	34223763	1267	46	3.63062	3.52221	53.1394	exonized	Kolobok-N1_DR	DNA/Kolobok?	chr10	34223288	34223333	+	15.1
ID=chr10:-:gene:34222497:34295864;children=Zv9_00025545;	Zv9_00025545	lincRNA	chr10	34222497	34295864	-	73368	1306	LAST	2	chr10	34222497	34223763	1267	414	32.6756	31.6998	53.1394	SPL	DNA2-3_DR	DNA/hAT?	chr10	34223350	34224475	-	12
ID=chr10:-:gene:34222497:34295864;children=Zv9_00025545;	Zv9_00025545	lincRNA	chr10	34222497	34295864	-	73368	1306	LAST	2	chr10	34222497	34223763	1267	27	2.13102	2.06738	53.1394	exonized	DNA2-1_DR	DNA/TcMar?	chr10	34223323	34223349	-	15.7
ID=chr10:-:gene:34222497:34295864;children=Zv9_00025545;	Zv9_00025545	lincRNA	chr10	34222497	34295864	-	73368	1306	LAST	2	chr10	34222497	34223763	1267	94	7.4191	7.19755	53.1394	exonized	ANGEL	DNA/hAT	chr10	34222966	34223059	-	17.6
ID=chr10:-:gene:34222497:34295864;children=Zv9_00025545;	Zv9_00025545	lincRNA	chr10	34222497	34295864	-	73368	1306	LAST	2	chr10	34222497	34223763	1267	74	5.84057	5.66616	53.1394	exonized	ANGEL	DNA/hAT	chr10	34222800	34222873	+	17.6
ID=chr10:-:gene:35974669:35981462;children=Zv9_00025586;	Zv9_00025586	lincRNA	chr10	35974669	35981462	-	6794	460	FIRST	1	chr10	35981301	35981462	162	18	11.1111	3.91304	3.91304	TSS	DIRS-1B-LTR_DR	LTR/Ngaro	chr10	35981445	35981519	-	15.1
ID=chr10:-:gene:36336330:36345075;children=UL_043;	UL_043	lincRNA	chr10	36336330	36345075	-	8746	3086	LAST	4	chr10	36336330	36338531	2202	124	5.63124	4.01815	4.01815	exonized	Kolobok-N1_DR	DNA/Kolobok?	chr10	36337802	36337925	-	15.1
ID=chr10:-:gene:38818639:38820879;children=UL_044;	UL_044	lincRNA	chr10	38818639	38820879	-	2241	967	LAST	2	chr10	38818639	38819455	817	69	8.44553	7.13547	7.13547	SPL	DNA-TA-2_DR	DNA	chr10	38819387	38819539	+	13.4
ID=chr10:-:gene:39679894:39682432;children=UL_045;	UL_045	lincRNA	chr10	39679894	39682432	-	2539	2539	SINGLE	1	chr10	39679894	39682432	2539	85	3.34777	3.34777	3.34777	exonized	HarbingerN6_DR	DNA/Harbinger	chr10	39680025	39680109	+	14.9
ID=chr10:-:gene:45019814:45060236;children=Zv9_00025791;	Zv9_00025791	lincRNA	chr10	45019814	45060236	-	40423	655	LAST	3	chr10	45019814	45020163	350	87	24.8571	13.2824	13.2824	PolyA	HE1_DR1	SINE/V	chr10	45019566	45019900	-	13.2
ID=chr10:-:gene:7009619:7012244;children=Zv9_00025064;	Zv9_00025064	lincRNA	chr10	7009619	7012244	-	2626	1475	FIRST	1	chr10	7011297	7012244	948	57	6.01266	3.86441	3.86441	exonized	hAT-N40_DR	DNA/hAT?	chr10	7011580	7011636	+	13.2
ID=chr10:+:gene:11226050:11227782;children=UL_034;	UL_034	lincRNA	chr10	11226050	11227782	+	1733	1733	SINGLE	1	chr10	11226050	11227782	1733	59	3.4045	3.4045	3.4045	TSS	piggyBac-N2_DR	DNA/PiggyBac	chr10	11225630	11226108	+	9.6
ID=chr10:+:gene:22334743:22339550;children=UL_037;	UL_037	lincRNA	chr10	22334743	22339550	+	4808	2746	LAST	2	chr10	22337358	22339550	2193	324	14.7743	11.799	17.9898	exonized	HATN10_DR	DNA/hAT	chr10	22339028	22339351	+	12.3
ID=chr10:+:gene:22334743:22339550;children=UL_037;	UL_037	lincRNA	chr10	22334743	22339550	+	4808	2746	LAST	2	chr10	22337358	22339550	2193	170	7.75194	6.19082	17.9898	exonized	DNA-5-8_DR	DNA	chr10	22339352	22339521	+	17.2
ID=chr10:+:gene:23293584:23298545;children=Zv9_00024392;	Zv9_00024392	lincRNA	chr10	23293584	23298545	+	4962	1012	LAST	3	chr10	23297895	23298545	651	256	39.3241	25.2964	25.2964	PolyA	HE1_DR1	SINE/V	chr10	23298290	23298655	-	13.2
ID=chr10:+:gene:46574127:46577344;children=Zv9_00024862;	Zv9_00024862	lincRNA	chr10	46574127	46577344	+	3218	742	MIDDLE	2	chr10	46575507	46575738	232	27	11.6379	3.63881	14.0162	SPL	TDR5	DNA/En-Spm	chr10	46575712	46575994	+	12.7
ID=chr10:+:gene:46574127:46577344;children=Zv9_00024862;	Zv9_00024862	lincRNA	chr10	46574127	46577344	+	3218	742	MIDDLE	3	chr10	46575819	46575895	77	77	100	10.3774	14.0162	Both_SPL	TDR5	DNA/En-Spm	chr10	46575712	46575994	+	12.7
ID=chr10:+:gene:4965217:4966671;children=UL_031;	UL_031	lincRNA	chr10	4965217	4966671	+	1455	1348	FIRST	1	chr10	4965217	4965691	475	165	34.7368	12.2404	27.1513	exonized	Mariner-N2_DR	DNA/TcMar	chr10	4965461	4965625	-	16.5
ID=chr10:+:gene:4965217:4966671;children=UL_031;	UL_031	lincRNA	chr10	4965217	4966671	+	1455	1348	FIRST	1	chr10	4965217	4965691	475	66	13.8947	4.89614	27.1513	SPL	HATN17_DR	DNA/hAT	chr10	4965626	4965777	+	14.2
ID=chr10:+:gene:4965217:4966671;children=UL_031;	UL_031	lincRNA	chr10	4965217	4966671	+	1455	1348	LAST	2	chr10	4965799	4966671	873	135	15.4639	10.0148	27.1513	SPL	TDR9	DNA	chr10	4965798	4965933	+	14.5
ID=chr10:+:gene:5533136:5546482;children=Zv9_00024017;	Zv9_00024017	lincRNA	chr10	5533136	5546482	+	13347	1267	LAST	2	chr10	5545389	5546482	1094	636	58.1353	50.1973	50.1973	exonized	Kolobok-N1_DR	DNA/Kolobok?	chr10	5545666	5546301	+	15.1
ID=chr10:+:gene:8394117:8395410;children=UL_033;	UL_033	lincRNA	chr10	8394117	8395410	+	1294	1294	SINGLE	1	chr10	8394117	8395410	1294	146	11.2828	11.2828	51.932	exonized	TDR8	DNA	chr10	8394200	8394345	+	13.3
ID=chr10:+:gene:8394117:8395410;children=UL_033;	UL_033	lincRNA	chr10	8394117	8395410	+	1294	1294	SINGLE	1	chr10	8394117	8395410	1294	350	27.0479	27.0479	51.932	exonized	HarbingerN6_DR	DNA/Harbinger	chr10	8394522	8394871	-	14.9
ID=chr10:+:gene:8394117:8395410;children=UL_033;	UL_033	lincRNA	chr10	8394117	8395410	+	1294	1294	SINGLE	1	chr10	8394117	8395410	1294	176	13.6012	13.6012	51.932	exonized	DIRS-1C-LTR_DR	LTR/Ngaro	chr10	8394350	8394525	+	12.8
ID=chr10:+:gene:9739857:9751983;children=Zv9_00024128,Zv9_00024129,Zv9_00024127;	Zv9_00024127	lincRNA	chr10	9739857	9751866	+	12010	4077	LAST	2	chr10	9747849	9751866	4018	396	9.85565	9.71302	20.5789	exonized	hAT-N25_DR	DNA/hAT-Ac	chr10	9748454	9748849	+	13.4
ID=chr10:+:gene:9739857:9751983;children=Zv9_00024128,Zv9_00024129,Zv9_00024127;	Zv9_00024127	lincRNA	chr10	9739857	9751866	+	12010	4077	LAST	2	chr10	9747849	9751866	4018	201	5.00249	4.9301	20.5789	exonized	HarbingerN5_DR	DNA/Harbinger	chr10	9749634	9749834	+	11.6
ID=chr10:+:gene:9739857:9751983;children=Zv9_00024128,Zv9_00024129,Zv9_00024127;	Zv9_00024127	lincRNA	chr10	9739857	9751866	+	12010	4077	LAST	2	chr10	9747849	9751866	4018	94	2.33947	2.30562	20.5789	exonized	HarbingerN5_DR	DNA/Harbinger	chr10	9749530	9749623	+	11.6
ID=chr10:+:gene:9739857:9751983;children=Zv9_00024128,Zv9_00024129,Zv9_00024127;	Zv9_00024127	lincRNA	chr10	9739857	9751866	+	12010	4077	LAST	2	chr10	9747849	9751866	4018	148	3.68342	3.63012	20.5789	exonized	DNA-X-8_DR	DNA	chr10	9748088	9748235	-	16.1
ID=chr10:+:gene:9739857:9751983;children=Zv9_00024129,Zv9_00024128,Zv9_00024127;	Zv9_00024128	lincRNA	chr10	9740089	9751983	+	11895	3473	FIRST	1	chr10	9740089	9740104	16	16	100	0.460697	18.2551	TSS_SPL	hAT-N25_DR	DNA/hAT-Ac	chr10	9740031	9740171	+	13.4
ID=chr10:+:gene:9739857:9751983;children=Zv9_00024129,Zv9_00024128,Zv9_00024127;	Zv9_00024128	lincRNA	chr10	9740089	9751983	+	11895	3473	LAST	2	chr10	9748527	9751983	3457	323	9.34336	9.30032	18.2551	SPL	hAT-N25_DR	DNA/hAT-Ac	chr10	9748454	9748849	+	13.4
ID=chr10:+:gene:9739857:9751983;children=Zv9_00024129,Zv9_00024128,Zv9_00024127;	Zv9_00024128	lincRNA	chr10	9740089	9751983	+	11895	3473	LAST	2	chr10	9748527	9751983	3457	201	5.81429	5.7875	18.2551	exonized	HarbingerN5_DR	DNA/Harbinger	chr10	9749634	9749834	+	11.6
ID=chr10:+:gene:9739857:9751983;children=Zv9_00024129,Zv9_00024128,Zv9_00024127;	Zv9_00024128	lincRNA	chr10	9740089	9751983	+	11895	3473	LAST	2	chr10	9748527	9751983	3457	94	2.71912	2.70659	18.2551	exonized	HarbingerN5_DR	DNA/Harbinger	chr10	9749530	9749623	+	11.6
ID=chr10:+:gene:9739857:9751983;children=Zv9_00024129,Zv9_00024128,Zv9_00024127;	Zv9_00024129	lincRNA	chr10	9740134	9751983	+	11850	3427	FIRST	1	chr10	9740134	9740187	54	38	70.3704	1.10884	16.691	TSS	hAT-N25_DR	DNA/hAT-Ac	chr10	9740031	9740171	+	13.4
ID=chr10:+:gene:9739857:9751983;children=Zv9_00024129,Zv9_00024128,Zv9_00024127;	Zv9_00024129	lincRNA	chr10	9740134	9751983	+	11850	3427	LAST	2	chr10	9748611	9751983	3373	239	7.08568	6.97403	16.691	SPL	hAT-N25_DR	DNA/hAT-Ac	chr10	9748454	9748849	+	13.4
ID=chr10:+:gene:9739857:9751983;children=Zv9_00024129,Zv9_00024128,Zv9_00024127;	Zv9_00024129	lincRNA	chr10	9740134	9751983	+	11850	3427	LAST	2	chr10	9748611	9751983	3373	201	5.95909	5.86519	16.691	exonized	HarbingerN5_DR	DNA/Harbinger	chr10	9749634	9749834	+	11.6
ID=chr10:+:gene:9739857:9751983;children=Zv9_00024129,Zv9_00024128,Zv9_00024127;	Zv9_00024129	lincRNA	chr10	9740134	9751983	+	11850	3427	LAST	2	chr10	9748611	9751983	3373	94	2.78684	2.74292	16.691	exonized	HarbingerN5_DR	DNA/Harbinger	chr10	9749530	9749623	+	11.6
ID=chr11:-:gene:33280482:33376862;children=Zv9_00027660;	Zv9_00027660	lincRNA	chr11	33280482	33376862	-	96381	1602	FIRST	1	chr11	33376557	33376862	306	113	36.9281	7.05368	50.6866	exonized	DNA-X-6_DR	DNA	chr11	33376723	33376835	-	16.3
ID=chr11:-:gene:33280482:33376862;children=Zv9_00027660;	Zv9_00027660	lincRNA	chr11	33280482	33376862	-	96381	1602	FIRST	1	chr11	33376557	33376862	306	152	49.6732	9.48814	50.6866	SPL	DNA-X-6_DR	DNA	chr11	33376490	33376708	-	16.3
ID=chr11:-:gene:33280482:33376862;children=Zv9_00027660;	Zv9_00027660	lincRNA	chr11	33280482	33376862	-	96381	1602	LAST	3	chr11	33280482	33281691	1210	307	25.3719	19.1635	50.6866	exonized	Helitron-N3_DR	DNA/Helitron	chr11	33281022	33281328	-	14.5
ID=chr11:-:gene:33280482:33376862;children=Zv9_00027660;	Zv9_00027660	lincRNA	chr11	33280482	33376862	-	96381	1602	LAST	3	chr11	33280482	33281691	1210	240	19.8347	14.9813	50.6866	exonized	DNA15TA1_DR	DNA/TcMar-Tc1	chr11	33280621	33280860	+	8.5
ID=chr11:-:gene:37325181:37527950;children=Zv9_00027738,Zv9_00027739;	Zv9_00027738	lincRNA	chr11	37325181	37527950	-	202770	1225	MIDDLE	2	chr11	37452061	37452166	106	36	33.9623	2.93878	24	SPL	DNA-5-4_DR	DNA	chr11	37452131	37452186	-	14.3
ID=chr11:-:gene:37325181:37527950;children=Zv9_00027738,Zv9_00027739;	Zv9_00027738	lincRNA	chr11	37325181	37527950	-	202770	1225	LAST	3	chr11	37325181	37325934	754	67	8.88594	5.46939	24	exonized	Mariner-N7_DR	DNA/TcMar	chr11	37325393	37325459	-	13.8
ID=chr11:-:gene:37325181:37527950;children=Zv9_00027738,Zv9_00027739;	Zv9_00027738	lincRNA	chr11	37325181	37527950	-	202770	1225	LAST	3	chr11	37325181	37325934	754	191	25.3316	15.5918	24	PolyA	ANGEL	DNA/hAT	chr11	37325079	37325371	+	17.6
ID=chr11:-:gene:37325181:37527950;children=Zv9_00027738,Zv9_00027739;	Zv9_00027739	lincRNA	chr11	37325183	37527945	-	202763	1218	MIDDLE	2	chr11	37439087	37439192	106	36	33.9623	2.95567	23.9737	SPL	DNA-5-4_DR	DNA	chr11	37439157	37439212	-	14.3
ID=chr11:-:gene:37325181:37527950;children=Zv9_00027738,Zv9_00027739;	Zv9_00027739	lincRNA	chr11	37325183	37527945	-	202763	1218	LAST	3	chr11	37325183	37325934	752	67	8.90957	5.50082	23.9737	exonized	Mariner-N7_DR	DNA/TcMar	chr11	37325393	37325459	-	13.8
ID=chr11:-:gene:37325181:37527950;children=Zv9_00027738,Zv9_00027739;	Zv9_00027739	lincRNA	chr11	37325183	37527945	-	202763	1218	LAST	3	chr11	37325183	37325934	752	189	25.133	15.5172	23.9737	PolyA	ANGEL	DNA/hAT	chr11	37325079	37325371	+	17.6
ID=chr11:-:gene:38587269:38596246;children=Zv9_00027770,Zv9_00027771,Zv9_00027769;	Zv9_00027769	lincRNA	chr11	38587269	38596103	-	8835	1816	LAST	2	chr11	38587269	38588698	1430	30	2.0979	1.65198	35.9581	PolyA	hAT-N64_DR	DNA/hAT?	chr11	38586576	38587298	+	11.7
ID=chr11:-:gene:38587269:38596246;children=Zv9_00027770,Zv9_00027771,Zv9_00027769;	Zv9_00027769	lincRNA	chr11	38587269	38596103	-	8835	1816	LAST	2	chr11	38587269	38588698	1430	501	35.035	27.5881	35.9581	exonized	HarbingerN3_DR	DNA/Harbinger	chr11	38587525	38588025	-	10.2
ID=chr11:-:gene:38587269:38596246;children=Zv9_00027770,Zv9_00027771,Zv9_00027769;	Zv9_00027769	lincRNA	chr11	38587269	38596103	-	8835	1816	LAST	2	chr11	38587269	38588698	1430	122	8.53147	6.71806	35.9581	SPL	ANGEL	DNA/hAT	chr11	38588577	38588707	+	17.6
ID=chr11:-:gene:38587269:38596246;children=Zv9_00027770,Zv9_00027771,Zv9_00027769;	Zv9_00027770	lincRNA	chr11	38587275	38596246	-	8972	1570	MIDDLE	2	chr11	38588532	38588698	167	122	73.0539	7.7707	41.2102	SPL	ANGEL	DNA/hAT	chr11	38588577	38588707	+	17.6
ID=chr11:-:gene:38587269:38596246;children=Zv9_00027770,Zv9_00027771,Zv9_00027769;	Zv9_00027770	lincRNA	chr11	38587275	38596246	-	8972	1570	LAST	3	chr11	38587275	38588148	874	24	2.746	1.52866	41.2102	PolyA	hAT-N64_DR	DNA/hAT?	chr11	38586576	38587298	+	11.7
ID=chr11:-:gene:38587269:38596246;children=Zv9_00027770,Zv9_00027771,Zv9_00027769;	Zv9_00027770	lincRNA	chr11	38587275	38596246	-	8972	1570	LAST	3	chr11	38587275	38588148	874	501	57.3227	31.9108	41.2102	exonized	HarbingerN3_DR	DNA/Harbinger	chr11	38587525	38588025	-	10.2
ID=chr11:-:gene:38587269:38596246;children=Zv9_00027770,Zv9_00027771,Zv9_00027769;	Zv9_00027771	lincRNA	chr11	38587275	38596246	-	8972	1673	MIDDLE	2	chr11	38591102	38591204	103	103	100	6.1566	44.8296	Both_SPL	I-3_DR	LINE/I	chr11	38590945	38591301	-	15.8
ID=chr11:-:gene:38587269:38596246;children=Zv9_00027770,Zv9_00027771,Zv9_00027769;	Zv9_00027771	lincRNA	chr11	38587275	38596246	-	8972	1673	MIDDLE	3	chr11	38588532	38588698	167	122	73.0539	7.29229	44.8296	SPL	ANGEL	DNA/hAT	chr11	38588577	38588707	+	17.6
ID=chr11:-:gene:38587269:38596246;children=Zv9_00027770,Zv9_00027771,Zv9_00027769;	Zv9_00027771	lincRNA	chr11	38587275	38596246	-	8972	1673	LAST	4	chr11	38587275	38588148	874	24	2.746	1.43455	44.8296	PolyA	hAT-N64_DR	DNA/hAT?	chr11	38586576	38587298	+	11.7
ID=chr11:-:gene:38587269:38596246;children=Zv9_00027770,Zv9_00027771,Zv9_00027769;	Zv9_00027771	lincRNA	chr11	38587275	38596246	-	8972	1673	LAST	4	chr11	38587275	38588148	874	501	57.3227	29.9462	44.8296	exonized	HarbingerN3_DR	DNA/Harbinger	chr11	38587525	38588025	-	10.2
ID=chr11:-:gene:38758784:38769757;children=Zv9_00027779,Zv9_00027780;	Zv9_00027779	lincRNA	chr11	38758784	38769740	-	10957	280	LAST	3	chr11	38758784	38758830	47	14	29.7872	5	5	PolyA	TC1DR3	DNA/TcMar-Tc1	chr11	38757988	38758797	+	10.4
ID=chr11:-:gene:43149983:43151702;children=UL_065;	UL_065	lincRNA	chr11	43149983	43151702	-	1720	1720	SINGLE	1	chr11	43149983	43151702	1720	255	14.8256	14.8256	14.8256	exonized	HATN8_DR	DNA	chr11	43150163	43150417	+	12.7
ID=chr11:-:gene:45768974:45784018;children=UL_068;	UL_068	lincRNA	chr11	45768974	45784018	-	15045	4027	LAST	12	chr11	45768974	45770146	1173	232	19.7783	5.76111	11.6464	exonized	DNA-3-4_DR	DNA/Harbinger	chr11	45769543	45769774	-	12.9
ID=chr11:-:gene:45768974:45784018;children=UL_068;	UL_068	lincRNA	chr11	45768974	45784018	-	15045	4027	LAST	12	chr11	45768974	45770146	1173	155	13.214	3.84902	11.6464	exonized	ANGEL	DNA/hAT	chr11	45769780	45769934	+	17.6
ID=chr11:-:gene:45768974:45784018;children=UL_068;	UL_068	lincRNA	chr11	45768974	45784018	-	15045	4027	LAST	12	chr11	45768974	45770146	1173	82	6.99062	2.03626	11.6464	exonized	ANGEL	DNA/hAT	chr11	45769454	45769535	-	17.6
ID=chr11:-:gene:5991571:5998933;children=Zv9_00027123;	Zv9_00027123	lincRNA	chr11	5991571	5998933	-	7363	7011	FIRST	1	chr11	5991980	5998933	6954	113	1.62496	1.61175	37.6266	exonized	TDR17	DNA	chr11	5996309	5996421	-	8.2
ID=chr11:-:gene:5991571:5998933;children=Zv9_00027123;	Zv9_00027123	lincRNA	chr11	5991571	5998933	-	7363	7011	FIRST	1	chr11	5991980	5998933	6954	65	0.934714	0.927115	37.6266	exonized	TDR17	DNA	chr11	5994767	5994831	-	8.2
ID=chr11:-:gene:5991571:5998933;children=Zv9_00027123;	Zv9_00027123	lincRNA	chr11	5991571	5998933	-	7363	7011	FIRST	1	chr11	5991980	5998933	6954	314	4.51539	4.47868	37.6266	exonized	TDR13	DNA	chr11	5998364	5998677	+	15.4
ID=chr11:-:gene:5991571:5998933;children=Zv9_00027123;	Zv9_00027123	lincRNA	chr11	5991571	5998933	-	7363	7011	FIRST	1	chr11	5991980	5998933	6954	524	7.53523	7.47397	37.6266	exonized	TDR13	DNA	chr11	5997841	5998364	-	15.4
ID=chr11:-:gene:5991571:5998933;children=Zv9_00027123;	Zv9_00027123	lincRNA	chr11	5991571	5998933	-	7363	7011	FIRST	1	chr11	5991980	5998933	6954	347	4.98993	4.94937	37.6266	exonized	HE1_DR1	SINE/V	chr11	5992995	5993341	+	13.2
ID=chr11:-:gene:5991571:5998933;children=Zv9_00027123;	Zv9_00027123	lincRNA	chr11	5991571	5998933	-	7363	7011	FIRST	1	chr11	5991980	5998933	6954	775	11.1447	11.0541	37.6266	SPL	EnSpm-N7_DR	DNA/En-Spm	chr11	5990351	5992754	+	13.1
ID=chr11:-:gene:5991571:5998933;children=Zv9_00027123;	Zv9_00027123	lincRNA	chr11	5991571	5998933	-	7363	7011	FIRST	1	chr11	5991980	5998933	6954	168	2.41588	2.39623	37.6266	exonized	DNA11TA1_DR	DNA/TcMar-Tc1	chr11	5993692	5993859	-	14.2
ID=chr11:-:gene:5991571:5998933;children=Zv9_00027123;	Zv9_00027123	lincRNA	chr11	5991571	5998933	-	7363	7011	FIRST	1	chr11	5991980	5998933	6954	275	3.95456	3.92241	37.6266	exonized	DNA-6-N2_DR	DNA	chr11	5993096	5993370	+	11.2
ID=chr11:-:gene:5991571:5998933;children=Zv9_00027123;	Zv9_00027123	lincRNA	chr11	5991571	5998933	-	7363	7011	LAST	2	chr11	5991571	5991627	57	57	100	0.813008	37.6266	PolyA_SPL	EnSpm-N7_DR	DNA/En-Spm	chr11	5990351	5992754	+	13.1
ID=chr11:-:gene:6452215:6453374;children=UL_052;	UL_052	lincRNA	chr11	6452215	6453374	-	1160	1160	SINGLE	1	chr11	6452215	6453374	1160	145	12.5	12.5	39.7414	exonized	MuDR-N1_DR	DNA/MuDR	chr11	6452664	6452808	+	10.9
ID=chr11:-:gene:6452215:6453374;children=UL_052;	UL_052	lincRNA	chr11	6452215	6453374	-	1160	1160	SINGLE	1	chr11	6452215	6453374	1160	49	4.22414	4.22414	39.7414	exonized	DNA-8-14_DR	DNA/hAT-Charlie	chr11	6452612	6452660	-	11.4
ID=chr11:-:gene:6452215:6453374;children=UL_052;	UL_052	lincRNA	chr11	6452215	6453374	-	1160	1160	SINGLE	1	chr11	6452215	6453374	1160	267	23.0172	23.0172	39.7414	exonized	DANA	SINE/V	chr11	6452386	6452652	+	9.7
ID=chr11:+:gene:1045499:1064784;children=Zv9_00025931;	Zv9_00025931	lincRNA	chr11	1045499	1064784	+	19286	792	MIDDLE	2	chr11	1051359	1051458	100	100	100	12.6263	12.6263	Both_SPL	TDR13	DNA	chr11	1051242	1051607	-	15.4
ID=chr11:+:gene:14322585:14323222;children=Zv9_00026230;	Zv9_00026230	lincRNA	chr11	14322585	14323222	+	638	508	FIRST	1	chr11	14322585	14322764	180	60	33.3333	11.811	47.6378	SPL	TDR19	DNA/hAT	chr11	14322705	14322774	-	19.4
ID=chr11:+:gene:14322585:14323222;children=Zv9_00026230;	Zv9_00026230	lincRNA	chr11	14322585	14323222	+	638	508	FIRST	1	chr11	14322585	14322764	180	76	42.2222	14.9606	47.6378	exonized	TDR19	DNA/hAT	chr11	14322686	14322761	+	19.4
ID=chr11:+:gene:14322585:14323222;children=Zv9_00026230;	Zv9_00026230	lincRNA	chr11	14322585	14323222	+	638	508	FIRST	1	chr11	14322585	14322764	180	51	28.3333	10.0394	47.6378	TSS	Harbinger-N10_DR	DNA/Harbinger	chr11	14322402	14322635	-	13.3
ID=chr11:+:gene:14322585:14323222;children=Zv9_00026230;	Zv9_00026230	lincRNA	chr11	14322585	14323222	+	638	508	FIRST	1	chr11	14322585	14322764	180	55	30.5556	10.8268	47.6378	exonized	DNA-2-18_DR	DNA/En-Spm?	chr11	14322636	14322690	+	16.2
ID=chr11:+:gene:18456417:18462949;children=Zv9_00026302;	Zv9_00026302	lincRNA	chr11	18456417	18462949	+	6533	3856	FIRST	1	chr11	18456417	18457050	634	428	67.5079	11.0996	42.0384	SPL	Gypsy-14-LTR_DR	LTR/Gypsy	chr11	18456623	18457911	+	3.9
ID=chr11:+:gene:18456417:18462949;children=Zv9_00026302;	Zv9_00026302	lincRNA	chr11	18456417	18462949	+	6533	3856	FIRST	1	chr11	18456417	18457050	634	24	3.78549	0.622407	42.0384	TSS	DNA-2-11_DR	DNA	chr11	18455811	18456440	+	12.4
ID=chr11:+:gene:18456417:18462949;children=Zv9_00026302;	Zv9_00026302	lincRNA	chr11	18456417	18462949	+	6533	3856	MIDDLE	2	chr11	18457354	18459120	1767	558	31.5789	14.471	42.0384	SPL	Gypsy-14-LTR_DR	LTR/Gypsy	chr11	18456623	18457911	+	3.9
ID=chr11:+:gene:18456417:18462949;children=Zv9_00026302;	Zv9_00026302	lincRNA	chr11	18456417	18462949	+	6533	3856	MIDDLE	2	chr11	18457354	18459120	1767	203	11.4884	5.26452	42.0384	exonized	ENSPM-6_DR	DNA/En-Spm	chr11	18457952	18458154	-	17.5
ID=chr11:+:gene:18456417:18462949;children=Zv9_00026302;	Zv9_00026302	lincRNA	chr11	18456417	18462949	+	6533	3856	LAST	3	chr11	18461495	18462949	1455	389	26.7354	10.0882	42.0384	exonized	HATN10_DR	DNA/hAT	chr11	18462006	18462394	+	12.3
ID=chr11:+:gene:18456417:18462949;children=Zv9_00026302;	Zv9_00026302	lincRNA	chr11	18456417	18462949	+	6533	3856	LAST	3	chr11	18461495	18462949	1455	19	1.30584	0.492739	42.0384	PolyA	DNA11TA1_DR	DNA/TcMar-Tc1	chr11	18462931	18463119	+	14.2
ID=chr11:+:gene:1901227:1921696;children=Zv9_00025969,Zv9_00025966,Zv9_00025968,Zv9_00025967;	Zv9_00025966	lincRNA	chr11	1901227	1902685	+	1459	617	LAST	2	chr11	1902460	1902685	226	144	63.7168	23.3387	37.1151	SPL	hAT-N22_DR	DNA/hAT	chr11	1902445	1902603	-	14.3
ID=chr11:+:gene:1901227:1921696;children=Zv9_00025969,Zv9_00025966,Zv9_00025968,Zv9_00025967;	Zv9_00025966	lincRNA	chr11	1901227	1902685	+	1459	617	LAST	2	chr11	1902460	1902685	226	85	37.6106	13.7763	37.1151	PolyA	TDR5	DNA/En-Spm	chr11	1902601	1903036	-	12.7
ID=chr11:+:gene:1901227:1921696;children=Zv9_00025969,Zv9_00025966,Zv9_00025968,Zv9_00025967;	Zv9_00025968	lincRNA	chr11	1901436	1911949	+	10514	1266	LAST	3	chr11	1911080	1911949	870	100	11.4943	7.89889	28.436	exonized	LOOPERN4B_DR	DNA/PiggyBac	chr11	1911384	1911483	+	12.4
ID=chr11:+:gene:1901227:1921696;children=Zv9_00025969,Zv9_00025966,Zv9_00025968,Zv9_00025967;	Zv9_00025968	lincRNA	chr11	1901436	1911949	+	10514	1266	LAST	3	chr11	1911080	1911949	870	201	23.1034	15.8768	28.436	exonized	DNA11TA1_DR	DNA/TcMar-Tc1	chr11	1911538	1911738	-	14.2
ID=chr11:+:gene:1901227:1921696;children=Zv9_00025969,Zv9_00025966,Zv9_00025968,Zv9_00025967;	Zv9_00025968	lincRNA	chr11	1901436	1911949	+	10514	1266	LAST	3	chr11	1911080	1911949	870	27	3.10345	2.1327	28.436	exonized	ANGEL	DNA/hAT	chr11	1911739	1911765	+	17.6
ID=chr11:+:gene:1901227:1921696;children=Zv9_00025969,Zv9_00025966,Zv9_00025968,Zv9_00025967;	Zv9_00025968	lincRNA	chr11	1901436	1911949	+	10514	1266	LAST	3	chr11	1911080	1911949	870	32	3.67816	2.52765	28.436	exonized	ANGEL	DNA/hAT	chr11	1911483	1911514	-	17.6
ID=chr11:+:gene:22135913:22139963;children=UL_058;	UL_058	lincRNA	chr11	22135913	22139963	+	4051	4051	SINGLE	1	chr11	22135913	22139963	4051	64	1.57986	1.57986	3.48062	exonized	CR1-2_DR	LINE/L2	chr11	22139126	22139189	+	9.9
ID=chr11:+:gene:22135913:22139963;children=UL_058;	UL_058	lincRNA	chr11	22135913	22139963	+	4051	4051	SINGLE	1	chr11	22135913	22139963	4051	77	1.90077	1.90077	3.48062	exonized	CR1-1_DR	LINE/L2	chr11	22138531	22138607	+	9.8
ID=chr11:+:gene:2286381:2298523;children=UL_049;	UL_049	lincRNA	chr11	2286381	2298523	+	12143	5303	LAST	6	chr11	2293762	2298523	4762	420	8.81982	7.92005	11.7858	exonized	Tc1N1_DR	DNA/En-Spm?	chr11	2297249	2297668	+	13.9
ID=chr11:+:gene:2286381:2298523;children=UL_049;	UL_049	lincRNA	chr11	2286381	2298523	+	12143	5303	LAST	6	chr11	2293762	2298523	4762	205	4.30491	3.86574	11.7858	exonized	ANGEL	DNA/hAT	chr11	2296496	2296700	+	17.6
ID=chr11:+:gene:2593978:2594931;children=Zv9_00025990;	Zv9_00025990	lincRNA	chr11	2593978	2594931	+	954	575	LAST	2	chr11	2594481	2594931	451	37	8.20399	6.43478	6.43478	PolyA	DNA-8-9_DR	DNA/hAT-Ac?	chr11	2594895	2595047	+	18.1
ID=chr11:+:gene:28390714:28403396;children=Zv9_00026526;	Zv9_00026526	lincRNA	chr11	28390714	28403396	+	12683	447	FIRST	1	chr11	28390714	28390797	84	19	22.619	4.25056	17.6734	TSS	TDR22	DNA	chr11	28390200	28390732	+	13.7
ID=chr11:+:gene:28390714:28403396;children=Zv9_00026526;	Zv9_00026526	lincRNA	chr11	28390714	28403396	+	12683	447	FIRST	1	chr11	28390714	28390797	84	60	71.4286	13.4228	17.6734	SPL	DNA-X-9_DR	DNA	chr11	28390738	28390862	-	19.5
ID=chr11:+:gene:28501924:28526422;children=Zv9_00026528,Zv9_00026529;	Zv9_00026529	lincRNA	chr11	28502012	28524280	+	22269	1248	LAST	3	chr11	28523433	28524280	848	272	32.0755	21.7949	32.7724	exonized	HATN10_DR	DNA/hAT	chr11	28523983	28524254	+	12.3
ID=chr11:+:gene:28501924:28526422;children=Zv9_00026528,Zv9_00026529;	Zv9_00026529	lincRNA	chr11	28502012	28524280	+	22269	1248	LAST	3	chr11	28523433	28524280	848	26	3.06604	2.08333	32.7724	PolyA	CR1-25_DR	LINE/L2	chr11	28524255	28524603	+	14.3
ID=chr11:+:gene:28501924:28526422;children=Zv9_00026528,Zv9_00026529;	Zv9_00026529	lincRNA	chr11	28502012	28524280	+	22269	1248	LAST	3	chr11	28523433	28524280	848	111	13.0896	8.89423	32.7724	exonized	ANGEL	DNA/hAT	chr11	28523785	28523895	-	17.6
ID=chr11:+:gene:28615330:28621122;children=UL_061;	UL_061	lincRNA	chr11	28615330	28621122	+	5793	5793	SINGLE	1	chr11	28615330	28621122	5793	169	2.91731	2.91731	47.7128	exonized	TDR16	DNA	chr11	28618728	28618896	+	13.9
ID=chr11:+:gene:28615330:28621122;children=UL_061;	UL_061	lincRNA	chr11	28615330	28621122	+	5793	5793	SINGLE	1	chr11	28615330	28621122	5793	167	2.88279	2.88279	47.7128	exonized	TDR16	DNA	chr11	28618233	28618399	-	13.9
ID=chr11:+:gene:28615330:28621122;children=UL_061;	UL_061	lincRNA	chr11	28615330	28621122	+	5793	5793	SINGLE	1	chr11	28615330	28621122	5793	143	2.4685	2.4685	47.7128	exonized	HE1_DR1	SINE/V	chr11	28619838	28619980	+	13.2
ID=chr11:+:gene:28615330:28621122;children=UL_061;	UL_061	lincRNA	chr11	28615330	28621122	+	5793	5793	SINGLE	1	chr11	28615330	28621122	5793	225	3.884	3.884	47.7128	exonized	HE1_DR1	SINE/V	chr11	28619106	28619330	-	13.2
ID=chr11:+:gene:28615330:28621122;children=UL_061;	UL_061	lincRNA	chr11	28615330	28621122	+	5793	5793	SINGLE	1	chr11	28615330	28621122	5793	198	3.41792	3.41792	47.7128	exonized	ENSPM-6_DR	DNA/En-Spm	chr11	28619400	28619597	+	17.5
ID=chr11:+:gene:28615330:28621122;children=UL_061;	UL_061	lincRNA	chr11	28615330	28621122	+	5793	5793	SINGLE	1	chr11	28615330	28621122	5793	64	1.10478	1.10478	47.7128	exonized	DNA2-1_DR	DNA/TcMar?	chr11	28619981	28620044	+	15.7
ID=chr11:+:gene:28615330:28621122;children=UL_061;	UL_061	lincRNA	chr11	28615330	28621122	+	5793	5793	SINGLE	1	chr11	28615330	28621122	5793	193	3.33161	3.33161	47.7128	exonized	DNA-TTAA0-1_DR	DNA	chr11	28618897	28619089	-	7.4
ID=chr11:+:gene:28615330:28621122;children=UL_061;	UL_061	lincRNA	chr11	28615330	28621122	+	5793	5793	SINGLE	1	chr11	28615330	28621122	5793	832	14.3622	14.3622	47.7128	exonized	DNA-TTAA0-1_DR	DNA	chr11	28617401	28618232	-	7.4
ID=chr11:+:gene:28615330:28621122;children=UL_061;	UL_061	lincRNA	chr11	28615330	28621122	+	5793	5793	SINGLE	1	chr11	28615330	28621122	5793	773	13.3437	13.3437	47.7128	exonized	DNA-5-2_DR	DNA/hAT-Tip100	chr11	28615966	28616738	-	12.6
ID=chr11:+:gene:30782088:30783669;children=UL_062;	UL_062	lincRNA	chr11	30782088	30783669	+	1582	1582	SINGLE	1	chr11	30782088	30783669	1582	52	3.28698	3.28698	3.28698	TSS	HarbingerN3_DR	DNA/Harbinger	chr11	30781053	30782139	+	10.2
ID=chr11:+:gene:43234836:43239555;children=Zv9_00026769;	Zv9_00026769	lincRNA	chr11	43234836	43239555	+	4720	899	FIRST	1	chr11	43234836	43234884	49	33	67.3469	3.67075	49.277	SPL	DNA-6-N5_DR	DNA	chr11	43234852	43234958	-	17.4
ID=chr11:+:gene:43234836:43239555;children=Zv9_00026769;	Zv9_00026769	lincRNA	chr11	43234836	43239555	+	4720	899	LAST	3	chr11	43238788	43239555	768	231	30.0781	25.6952	49.277	exonized	TDR24	DNA	chr11	43239046	43239276	-	15.1
ID=chr11:+:gene:43234836:43239555;children=Zv9_00026769;	Zv9_00026769	lincRNA	chr11	43234836	43239555	+	4720	899	LAST	3	chr11	43238788	43239555	768	150	19.5312	16.6852	49.277	PolyA	DNA-8-36_DR	DNA/hAT-Tip100	chr11	43239406	43239572	-	14.1
ID=chr11:+:gene:43234836:43239555;children=Zv9_00026769;	Zv9_00026769	lincRNA	chr11	43234836	43239555	+	4720	899	LAST	3	chr11	43238788	43239555	768	29	3.77604	3.22581	49.277	exonized	DNA-8-36_DR	DNA/hAT-Tip100	chr11	43239348	43239376	-	14.1
ID=chr11:+:gene:461145:491521;children=Zv9_00025909,Zv9_00025910;	Zv9_00025909	lincRNA	chr11	461145	491521	+	30377	500	FIRST	1	chr11	461145	461609	465	159	34.1935	31.8	38.8	SPL	Tc1N1_DR	DNA/En-Spm?	chr11	461451	461863	+	13.9
ID=chr11:+:gene:461145:491521;children=Zv9_00025909,Zv9_00025910;	Zv9_00025909	lincRNA	chr11	461145	491521	+	30377	500	LAST	2	chr11	491487	491521	35	35	100	7	38.8	PolyA_SPL	Tc1N1_DR	DNA/En-Spm?	chr11	491282	491611	+	13.9
ID=chr11:+:gene:46135905:46140377;children=Zv9_00026890;	Zv9_00026890	lincRNA	chr11	46135905	46140377	+	4473	4048	FIRST	1	chr11	46135905	46138709	2805	39	1.39037	0.963439	0.963439	TSS	TDR18	DNA/hAT-Charlie	chr11	46135404	46135943	-	10.6
ID=chr11:+:gene:6106647:6109345;children=UL_050,UL_051;	UL_050	lincRNA	chr11	6106647	6108927	+	2281	1330	MIDDLE	2	chr11	6106938	6107766	829	114	13.7515	8.57143	46.4662	exonized	Mariner-N3_DR	DNA/En-Spm?	chr11	6107545	6107658	-	17.2
ID=chr11:+:gene:6106647:6109345;children=UL_050,UL_051;	UL_050	lincRNA	chr11	6106647	6108927	+	2281	1330	MIDDLE	2	chr11	6106938	6107766	829	85	10.2533	6.39098	46.4662	SPL	ANGEL	DNA/hAT	chr11	6107682	6107778	+	17.6
ID=chr11:+:gene:6106647:6109345;children=UL_050,UL_051;	UL_050	lincRNA	chr11	6106647	6108927	+	2281	1330	MIDDLE	2	chr11	6106938	6107766	829	147	17.7322	11.0526	46.4662	exonized	ANGEL	DNA/hAT	chr11	6107499	6107645	-	17.6
ID=chr11:+:gene:6106647:6109345;children=UL_050,UL_051;	UL_050	lincRNA	chr11	6106647	6108927	+	2281	1330	MIDDLE	2	chr11	6106938	6107766	829	142	17.1291	10.6767	46.4662	exonized	ANGEL	DNA/hAT	chr11	6107276	6107417	-	17.6
ID=chr11:+:gene:6106647:6109345;children=UL_050,UL_051;	UL_050	lincRNA	chr11	6106647	6108927	+	2281	1330	LAST	3	chr11	6108472	6108927	456	64	14.0351	4.81203	46.4662	exonized	ANGEL	DNA/hAT	chr11	6108575	6108638	-	17.6
ID=chr11:+:gene:6106647:6109345;children=UL_050,UL_051;	UL_050	lincRNA	chr11	6106647	6108927	+	2281	1330	LAST	3	chr11	6108472	6108927	456	47	10.307	3.53383	46.4662	exonized	ANGEL	DNA/hAT	chr11	6108501	6108547	+	17.6
ID=chr11:+:gene:6106647:6109345;children=UL_050,UL_051;	UL_050	lincRNA	chr11	6106647	6108927	+	2281	1330	LAST	3	chr11	6108472	6108927	456	19	4.16667	1.42857	46.4662	SPL	ANGEL	DNA/hAT	chr11	6108373	6108490	+	17.6
ID=chr11:+:gene:6106647:6109345;children=UL_050,UL_051;	UL_051	lincRNA	chr11	6106647	6109345	+	2699	2453	LAST	2	chr11	6106938	6109345	2408	114	4.73422	4.64737	56.4207	exonized	Mariner-N3_DR	DNA/En-Spm?	chr11	6107545	6107658	-	17.2
ID=chr11:+:gene:6106647:6109345;children=UL_050,UL_051;	UL_051	lincRNA	chr11	6106647	6109345	+	2699	2453	LAST	2	chr11	6106938	6109345	2408	125	5.19103	5.0958	56.4207	exonized	Kolobok-N4_DR	DNA/Kolobok	chr11	6108352	6108476	+	18.7
ID=chr11:+:gene:6106647:6109345;children=UL_050,UL_051;	UL_051	lincRNA	chr11	6106647	6109345	+	2699	2453	LAST	2	chr11	6106938	6109345	2408	124	5.1495	5.05503	56.4207	exonized	Kolobok-N4_DR	DNA/Kolobok	chr11	6108037	6108160	+	18.7
ID=chr11:+:gene:6106647:6109345;children=UL_050,UL_051;	UL_051	lincRNA	chr11	6106647	6109345	+	2699	2453	LAST	2	chr11	6106938	6109345	2408	64	2.65781	2.60905	56.4207	exonized	ANGEL	DNA/hAT	chr11	6108575	6108638	-	17.6
ID=chr11:+:gene:6106647:6109345;children=UL_050,UL_051;	UL_051	lincRNA	chr11	6106647	6109345	+	2699	2453	LAST	2	chr11	6106938	6109345	2408	47	1.95183	1.91602	56.4207	exonized	ANGEL	DNA/hAT	chr11	6108501	6108547	+	17.6
ID=chr11:+:gene:6106647:6109345;children=UL_050,UL_051;	UL_051	lincRNA	chr11	6106647	6109345	+	2699	2453	LAST	2	chr11	6106938	6109345	2408	118	4.90033	4.81044	56.4207	exonized	ANGEL	DNA/hAT	chr11	6108373	6108490	+	17.6
ID=chr11:+:gene:6106647:6109345;children=UL_050,UL_051;	UL_051	lincRNA	chr11	6106647	6109345	+	2699	2453	LAST	2	chr11	6106938	6109345	2408	82	3.40532	3.34285	56.4207	exonized	ANGEL	DNA/hAT	chr11	6108250	6108331	+	17.6
ID=chr11:+:gene:6106647:6109345;children=UL_050,UL_051;	UL_051	lincRNA	chr11	6106647	6109345	+	2699	2453	LAST	2	chr11	6106938	6109345	2408	112	4.65116	4.56584	56.4207	exonized	ANGEL	DNA/hAT	chr11	6108062	6108173	+	17.6
ID=chr11:+:gene:6106647:6109345;children=UL_050,UL_051;	UL_051	lincRNA	chr11	6106647	6109345	+	2699	2453	LAST	2	chr11	6106938	6109345	2408	173	7.18439	7.05259	56.4207	exonized	ANGEL	DNA/hAT	chr11	6107864	6108036	+	17.6
ID=chr11:+:gene:6106647:6109345;children=UL_050,UL_051;	UL_051	lincRNA	chr11	6106647	6109345	+	2699	2453	LAST	2	chr11	6106938	6109345	2408	39	1.6196	1.58989	56.4207	exonized	ANGEL	DNA/hAT	chr11	6107800	6107838	+	17.6
ID=chr11:+:gene:6106647:6109345;children=UL_050,UL_051;	UL_051	lincRNA	chr11	6106647	6109345	+	2699	2453	LAST	2	chr11	6106938	6109345	2408	97	4.02824	3.95434	56.4207	exonized	ANGEL	DNA/hAT	chr11	6107682	6107778	+	17.6
ID=chr11:+:gene:6106647:6109345;children=UL_050,UL_051;	UL_051	lincRNA	chr11	6106647	6109345	+	2699	2453	LAST	2	chr11	6106938	6109345	2408	147	6.10465	5.99266	56.4207	exonized	ANGEL	DNA/hAT	chr11	6107499	6107645	-	17.6
ID=chr11:+:gene:6106647:6109345;children=UL_050,UL_051;	UL_051	lincRNA	chr11	6106647	6109345	+	2699	2453	LAST	2	chr11	6106938	6109345	2408	142	5.89701	5.78883	56.4207	exonized	ANGEL	DNA/hAT	chr11	6107276	6107417	-	17.6
ID=chr12:-:gene:10915209:11021430;children=Zv9_00029445;	Zv9_00029445	lincRNA	chr12	10915209	11021430	-	106222	1216	FIRST	1	chr12	11021334	11021430	97	23	23.7113	1.89145	1.89145	TSS	hAT-N24_DR	DNA/hAT?	chr12	11021408	11021774	-	11.1
ID=chr12:-:gene:11139722:11142754;children=Zv9_00029450;	Zv9_00029450	lincRNA	chr12	11139722	11142754	-	3033	1213	LAST	3	chr12	11139722	11140242	521	126	24.1843	10.3875	11.3768	exonized	TE-X-4_DR	Unknown	chr12	11139835	11139960	+	17.1
ID=chr12:-:gene:11139722:11142754;children=Zv9_00029450;	Zv9_00029450	lincRNA	chr12	11139722	11142754	-	3033	1213	LAST	3	chr12	11139722	11140242	521	12	2.30326	0.989283	11.3768	PolyA	TDR18	DNA/hAT-Charlie	chr12	11139508	11139733	+	10.6
ID=chr12:-:gene:23909969:23915273;children=UL_072;	UL_072	lincRNA	chr12	23909969	23915273	-	5305	5305	SINGLE	1	chr12	23909969	23915273	5305	119	2.24317	2.24317	19.3968	exonized	TE-X-4_DR	Unknown	chr12	23910436	23910554	+	17.1
ID=chr12:-:gene:23909969:23915273;children=UL_072;	UL_072	lincRNA	chr12	23909969	23915273	-	5305	5305	SINGLE	1	chr12	23909969	23915273	5305	81	1.52686	1.52686	19.3968	exonized	TE-X-4_DR	Unknown	chr12	23910205	23910285	-	17.1
ID=chr12:-:gene:23909969:23915273;children=UL_072;	UL_072	lincRNA	chr12	23909969	23915273	-	5305	5305	SINGLE	1	chr12	23909969	23915273	5305	745	14.0434	14.0434	19.3968	exonized	DNA-8-2_DR	DNA/hAT	chr12	23910915	23911659	+	11.6
ID=chr12:-:gene:23909969:23915273;children=UL_072;	UL_072	lincRNA	chr12	23909969	23915273	-	5305	5305	SINGLE	1	chr12	23909969	23915273	5305	23	0.433553	0.433553	19.3968	exonized	DNA-2-1_DR	DNA	chr12	23912113	23912135	-	16.1
ID=chr12:-:gene:23909969:23915273;children=UL_072;	UL_072	lincRNA	chr12	23909969	23915273	-	5305	5305	SINGLE	1	chr12	23909969	23915273	5305	61	1.14986	1.14986	19.3968	exonized	CR1-40_DR	LINE/Rex-Babar	chr12	23912136	23912196	+	8.9
ID=chr12:-:gene:26951369:26960210;children=Zv9_00029721;	Zv9_00029721	lincRNA	chr12	26951369	26960210	-	8842	894	MIDDLE	2	chr12	26952609	26952771	163	163	100	18.2327	40.1566	Both_SPL	TDR13	DNA	chr12	26952455	26953197	+	15.4
ID=chr12:-:gene:26951369:26960210;children=Zv9_00029721;	Zv9_00029721	lincRNA	chr12	26951369	26960210	-	8842	894	MIDDLE	3	chr12	26952031	26952101	71	71	100	7.94183	40.1566	Both_SPL	ANGEL	DNA/hAT	chr12	26952014	26952214	+	17.6
ID=chr12:-:gene:26951369:26960210;children=Zv9_00029721;	Zv9_00029721	lincRNA	chr12	26951369	26960210	-	8842	894	LAST	4	chr12	26951369	26951896	528	125	23.6742	13.9821	40.1566	exonized	SINE2-1_DR	SINE/tRNA	chr12	26951370	26951494	+	19.1
ID=chr12:-:gene:28715780:28728236;children=Zv9_00029765;	Zv9_00029765	lincRNA	chr12	28715780	28728236	-	12457	517	MIDDLE	2	chr12	28718552	28718638	87	87	100	16.8279	16.8279	Both_SPL	Kolobok-N2_DR	DNA/Kolobok	chr12	28718310	28719169	-	14.7
ID=chr12:-:gene:33865733:33870953;children=UL_080;	UL_080	lincRNA	chr12	33865733	33870953	-	5221	2016	LAST	2	chr12	33865733	33866939	1207	122	10.1077	6.05159	6.05159	exonized	EnSpm-N4_DR	DNA/En-Spm?	chr12	33865962	33866083	-	14.2
ID=chr12:-:gene:37057356:37060766;children=UL_086;	UL_086	lincRNA	chr12	37057356	37060766	-	3411	840	FIRST	1	chr12	37060696	37060766	71	51	71.831	6.07143	60.4762	SPL	EnSpm-6N1_DR	DNA/En-Spm	chr12	37059941	37060746	+	16.4
ID=chr12:-:gene:37057356:37060766;children=UL_086;	UL_086	lincRNA	chr12	37057356	37060766	-	3411	840	MIDDLE	2	chr12	37060222	37060299	78	78	100	9.28571	60.4762	Both_SPL	EnSpm-6N1_DR	DNA/En-Spm	chr12	37059941	37060746	+	16.4
ID=chr12:-:gene:37057356:37060766;children=UL_086;	UL_086	lincRNA	chr12	37057356	37060766	-	3411	840	MIDDLE	3	chr12	37059320	37059376	57	57	100	6.78571	60.4762	Both_SPL	EnSpm-6N1_DR	DNA/En-Spm	chr12	37059134	37059758	+	16.4
ID=chr12:-:gene:37057356:37060766;children=UL_086;	UL_086	lincRNA	chr12	37057356	37060766	-	3411	840	LAST	4	chr12	37057356	37057989	634	322	50.7886	38.3333	60.4762	exonized	HE1_DR1	SINE/V	chr12	37057568	37057889	+	13.2
ID=chr12:-:gene:40967394:40981038;children=Zv9_00029999;	Zv9_00029999	lincRNA	chr12	40967394	40981038	-	13645	445	LAST	3	chr12	40967394	40967572	179	166	92.7374	37.3034	37.3034	PolyA	Kolobok-N2_DR	DNA/Kolobok	chr12	40966892	40967559	-	14.7
ID=chr12:-:gene:44254848:44257953;children=Zv9_00030026;	Zv9_00030026	lincRNA	chr12	44254848	44257953	-	3106	2181	LAST	2	chr12	44254848	44255216	369	77	20.8672	3.53049	17.4232	exonized	LOOPERN6_DR	DNA/PiggyBac	chr12	44254992	44255068	-	14.3
ID=chr12:-:gene:44254848:44257953;children=Zv9_00030026;	Zv9_00030026	lincRNA	chr12	44254848	44257953	-	3106	2181	LAST	2	chr12	44254848	44255216	369	157	42.5474	7.19853	17.4232	PolyA	LOOPERN6_DR	DNA/PiggyBac	chr12	44254752	44255004	-	14.3
ID=chr12:-:gene:44254848:44257953;children=Zv9_00030026;	Zv9_00030026	lincRNA	chr12	44254848	44257953	-	3106	2181	LAST	2	chr12	44254848	44255216	369	146	39.5664	6.69418	17.4232	exonized	HATN14_DR	DNA/hAT	chr12	44255067	44255212	+	16.6
ID=chr12:-:gene:44311410:44318829;children=UL_091,UL_090;	UL_090	lincRNA	chr12	44311410	44318829	-	7420	3531	LAST	4	chr12	44311410	44314398	2989	526	17.5979	14.8966	50.6372	exonized	TDR18	DNA/hAT-Charlie	chr12	44312290	44312815	-	10.6
ID=chr12:-:gene:44311410:44318829;children=UL_091,UL_090;	UL_090	lincRNA	chr12	44311410	44318829	-	7420	3531	LAST	4	chr12	44311410	44314398	2989	343	11.4754	9.71396	50.6372	exonized	HE1_DR1	SINE/V	chr12	44313435	44313777	+	13.2
ID=chr12:-:gene:44311410:44318829;children=UL_091,UL_090;	UL_090	lincRNA	chr12	44311410	44318829	-	7420	3531	LAST	4	chr12	44311410	44314398	2989	367	12.2784	10.3937	50.6372	exonized	HE1_DR1	SINE/V	chr12	44312879	44313245	-	13.2
ID=chr12:-:gene:44311410:44318829;children=UL_091,UL_090;	UL_090	lincRNA	chr12	44311410	44318829	-	7420	3531	LAST	4	chr12	44311410	44314398	2989	15	0.50184	0.424809	50.6372	exonized	DNA8-9_DR	DNA/hAT	chr12	44313420	44313434	+	18
ID=chr12:-:gene:44311410:44318829;children=UL_091,UL_090;	UL_090	lincRNA	chr12	44311410	44318829	-	7420	3531	LAST	4	chr12	44311410	44314398	2989	400	13.3824	11.3282	50.6372	exonized	DNA15TA1_DR	DNA/TcMar-Tc1	chr12	44311682	44312081	-	8.5
ID=chr12:-:gene:44311410:44318829;children=UL_091,UL_090;	UL_090	lincRNA	chr12	44311410	44318829	-	7420	3531	LAST	4	chr12	44311410	44314398	2989	137	4.58347	3.87992	50.6372	exonized	DNA-8-14_DR	DNA/hAT-Charlie	chr12	44313661	44313797	-	11.4
ID=chr12:-:gene:44311410:44318829;children=UL_091,UL_090;	UL_091	lincRNA	chr12	44311410	44318829	-	7420	3534	LAST	4	chr12	44311410	44314398	2989	526	17.5979	14.884	50.5942	exonized	TDR18	DNA/hAT-Charlie	chr12	44312290	44312815	-	10.6
ID=chr12:-:gene:44311410:44318829;children=UL_091,UL_090;	UL_091	lincRNA	chr12	44311410	44318829	-	7420	3534	LAST	4	chr12	44311410	44314398	2989	343	11.4754	9.70572	50.5942	exonized	HE1_DR1	SINE/V	chr12	44313435	44313777	+	13.2
ID=chr12:-:gene:44311410:44318829;children=UL_091,UL_090;	UL_091	lincRNA	chr12	44311410	44318829	-	7420	3534	LAST	4	chr12	44311410	44314398	2989	367	12.2784	10.3848	50.5942	exonized	HE1_DR1	SINE/V	chr12	44312879	44313245	-	13.2
ID=chr12:-:gene:44311410:44318829;children=UL_091,UL_090;	UL_091	lincRNA	chr12	44311410	44318829	-	7420	3534	LAST	4	chr12	44311410	44314398	2989	15	0.50184	0.424448	50.5942	exonized	DNA8-9_DR	DNA/hAT	chr12	44313420	44313434	+	18
ID=chr12:-:gene:44311410:44318829;children=UL_091,UL_090;	UL_091	lincRNA	chr12	44311410	44318829	-	7420	3534	LAST	4	chr12	44311410	44314398	2989	400	13.3824	11.3186	50.5942	exonized	DNA15TA1_DR	DNA/TcMar-Tc1	chr12	44311682	44312081	-	8.5
ID=chr12:-:gene:44311410:44318829;children=UL_091,UL_090;	UL_091	lincRNA	chr12	44311410	44318829	-	7420	3534	LAST	4	chr12	44311410	44314398	2989	137	4.58347	3.87663	50.5942	exonized	DNA-8-14_DR	DNA/hAT-Charlie	chr12	44313661	44313797	-	11.4
ID=chr12:-:gene:46226531:46236752;children=UL_092;	UL_092	lincRNA	chr12	46226531	46236752	-	10222	2376	LAST	5	chr12	46226531	46228133	1603	511	31.8777	21.5067	34.2593	exonized	TDR1	DNA/TcMar-Tc1	chr12	46226990	46227500	+	8.2
ID=chr12:-:gene:46226531:46236752;children=UL_092;	UL_092	lincRNA	chr12	46226531	46236752	-	10222	2376	LAST	5	chr12	46226531	46228133	1603	173	10.7923	7.28114	34.2593	exonized	TDR1	DNA/TcMar-Tc1	chr12	46226628	46226800	+	8.2
ID=chr12:-:gene:46226531:46236752;children=UL_092;	UL_092	lincRNA	chr12	46226531	46236752	-	10222	2376	LAST	5	chr12	46226531	46228133	1603	34	2.12102	1.43098	34.2593	exonized	EnSpm-N1_DR	DNA/En-Spm	chr12	46227655	46227688	-	19.7
ID=chr12:-:gene:46226531:46236752;children=UL_092;	UL_092	lincRNA	chr12	46226531	46236752	-	10222	2376	LAST	5	chr12	46226531	46228133	1603	96	5.98877	4.0404	34.2593	exonized	ANGEL	DNA/hAT	chr12	46227559	46227654	-	17.6
ID=chr12:-:gene:46746711:46750919;children=Zv9_00030066;	Zv9_00030066	lincRNA	chr12	46746711	46750919	-	4209	3985	FIRST	1	chr12	46749714	46750919	1206	147	12.1891	3.68883	39.2974	exonized	HAT1_DR	DNA/hAT-Ac	chr12	46749776	46749922	-	19
ID=chr12:-:gene:46746711:46750919;children=Zv9_00030066;	Zv9_00030066	lincRNA	chr12	46746711	46750919	-	4209	3985	FIRST	1	chr12	46749714	46750919	1206	115	9.53566	2.88582	39.2974	SPL	DNA2-1_DR	DNA/TcMar?	chr12	46749663	46749828	C	15.7
ID=chr12:-:gene:46746711:46750919;children=Zv9_00030066;	Zv9_00030066	lincRNA	chr12	46746711	46750919	-	4209	3985	LAST	2	chr12	46746711	46749489	2779	138	4.96582	3.46299	39.2974	exonized	hAT-N32_DR	DNA/hAT-Charlie	chr12	46746742	46746879	-	14.3
ID=chr12:-:gene:46746711:46750919;children=Zv9_00030066;	Zv9_00030066	lincRNA	chr12	46746711	46750919	-	4209	3985	LAST	2	chr12	46746711	46749489	2779	61	2.19503	1.53074	39.2974	exonized	TE-X-4_DR	Unknown	chr12	46747691	46747751	-	17.1
ID=chr12:-:gene:46746711:46750919;children=Zv9_00030066;	Zv9_00030066	lincRNA	chr12	46746711	46750919	-	4209	3985	LAST	2	chr12	46746711	46749489	2779	59	2.12307	1.48055	39.2974	exonized	HAT1_DR	DNA/hAT-Ac	chr12	46749385	46749443	-	19
ID=chr12:-:gene:46746711:46750919;children=Zv9_00030066;	Zv9_00030066	lincRNA	chr12	46746711	46750919	-	4209	3985	LAST	2	chr12	46746711	46749489	2779	30	1.07953	0.752823	39.2974	exonized	HAT1_DR	DNA/hAT-Ac	chr12	46749272	46749301	-	19
ID=chr12:-:gene:46746711:46750919;children=Zv9_00030066;	Zv9_00030066	lincRNA	chr12	46746711	46750919	-	4209	3985	LAST	2	chr12	46746711	46749489	2779	89	3.20259	2.23338	39.2974	SPL	HAT1N_DR	DNA/hAT	chr12	46749401	46749535	-	17.4
ID=chr12:-:gene:46746711:46750919;children=Zv9_00030066;	Zv9_00030066	lincRNA	chr12	46746711	46750919	-	4209	3985	LAST	2	chr12	46746711	46749489	2779	83	2.98669	2.08281	39.2974	exonized	DNA2-1_DR	DNA/TcMar?	chr12	46749302	46749384	C	15.7
ID=chr12:-:gene:46746711:46750919;children=Zv9_00030066;	Zv9_00030066	lincRNA	chr12	46746711	46750919	-	4209	3985	LAST	2	chr12	46746711	46749489	2779	48	1.72724	1.20452	39.2974	exonized	DNA2-1_DR	DNA/TcMar?	chr12	46749253	46749300	-	15.7
ID=chr12:-:gene:46746711:46750919;children=Zv9_00030066;	Zv9_00030066	lincRNA	chr12	46746711	46750919	-	4209	3985	LAST	2	chr12	46746711	46749489	2779	380	13.674	9.53576	39.2974	exonized	DNA2-1_DR	DNA/TcMar?	chr12	46748600	46748979	C	15.7
ID=chr12:-:gene:46746711:46750919;children=Zv9_00030066;	Zv9_00030066	lincRNA	chr12	46746711	46750919	-	4209	3985	LAST	2	chr12	46746711	46749489	2779	72	2.59086	1.80678	39.2974	exonized	DNA-TA-2_DR	DNA	chr12	46748252	46748323	+	13.4
ID=chr12:-:gene:46746711:46750919;children=Zv9_00030066;	Zv9_00030066	lincRNA	chr12	46746711	46750919	-	4209	3985	LAST	2	chr12	46746711	46749489	2779	106	3.81432	2.65997	39.2974	exonized	DNA-TA-2_DR	DNA	chr12	46747792	46747897	-	13.4
ID=chr12:-:gene:46746711:46750919;children=Zv9_00030066;	Zv9_00030066	lincRNA	chr12	46746711	46750919	-	4209	3985	LAST	2	chr12	46746711	46749489	2779	238	8.56423	5.9724	39.2974	exonized	DNA-3-6_DR	DNA?	chr12	46749015	46749252	-	16.1
ID=chr12:-:gene:50508769:50538838;children=Zv9_00030138;	Zv9_00030138	lincRNA	chr12	50508769	50538838	-	30070	613	LAST	3	chr12	50508769	50509149	381	30	7.87402	4.89396	18.9233	PolyA	TDR18	DNA/hAT-Charlie	chr12	50508434	50508798	+	10.6
ID=chr12:-:gene:50508769:50538838;children=Zv9_00030138;	Zv9_00030138	lincRNA	chr12	50508769	50538838	-	30070	613	LAST	3	chr12	50508769	50509149	381	86	22.5722	14.0294	18.9233	exonized	Helitron-N3_DR	DNA/Helitron	chr12	50508799	50508884	+	14.5
ID=chr12:-:gene:7057149:7176855;children=Zv9_00029366,Zv9_00029365,Zv9_00029367;	Zv9_00029367	lincRNA	chr12	7074105	7176855	-	102751	1346	LAST	4	chr12	7074105	7074944	840	428	50.9524	31.7979	36.9985	exonized	TC1DR3	DNA/TcMar-Tc1	chr12	7074121	7074548	+	10.4
ID=chr12:-:gene:7057149:7176855;children=Zv9_00029366,Zv9_00029365,Zv9_00029367;	Zv9_00029367	lincRNA	chr12	7074105	7176855	-	102751	1346	LAST	4	chr12	7074105	7074944	840	70	8.33333	5.20059	36.9985	exonized	HATN10_DR	DNA/hAT	chr12	7074557	7074626	+	12.3
ID=chr12:+:gene:1939799:2212017;children=Zv9_00028053,Zv9_00028050,Zv9_00028049,Zv9_00028052,Zv9_00028054;	Zv9_00028054	lincRNA	chr12	1939873	2212017	+	272145	3225	LAST	6	chr12	2209458	2212017	2560	71	2.77344	2.20155	18.8527	exonized	HATN12_DR	DNA/hAT-Ac	chr12	2211841	2211911	+	16.5
ID=chr12:+:gene:1939799:2212017;children=Zv9_00028053,Zv9_00028050,Zv9_00028049,Zv9_00028052,Zv9_00028054;	Zv9_00028054	lincRNA	chr12	1939873	2212017	+	272145	3225	LAST	6	chr12	2209458	2212017	2560	114	4.45312	3.53488	18.8527	exonized	HATN12_DR	DNA/hAT-Ac	chr12	2211620	2211733	+	16.5
ID=chr12:+:gene:1939799:2212017;children=Zv9_00028053,Zv9_00028050,Zv9_00028049,Zv9_00028052,Zv9_00028054;	Zv9_00028054	lincRNA	chr12	1939873	2212017	+	272145	3225	LAST	6	chr12	2209458	2212017	2560	104	4.0625	3.22481	18.8527	exonized	HATN12_DR	DNA/hAT-Ac	chr12	2211163	2211266	+	16.5
ID=chr12:+:gene:1939799:2212017;children=Zv9_00028053,Zv9_00028050,Zv9_00028049,Zv9_00028052,Zv9_00028054;	Zv9_00028054	lincRNA	chr12	1939873	2212017	+	272145	3225	LAST	6	chr12	2209458	2212017	2560	55	2.14844	1.70543	18.8527	exonized	HATN12_DR	DNA/hAT-Ac	chr12	2210949	2211003	+	16.5
ID=chr12:+:gene:1939799:2212017;children=Zv9_00028053,Zv9_00028050,Zv9_00028049,Zv9_00028052,Zv9_00028054;	Zv9_00028054	lincRNA	chr12	1939873	2212017	+	272145	3225	LAST	6	chr12	2209458	2212017	2560	89	3.47656	2.75969	18.8527	exonized	HATN12_DR	DNA/hAT-Ac	chr12	2210773	2210861	+	16.5
ID=chr12:+:gene:1939799:2212017;children=Zv9_00028053,Zv9_00028050,Zv9_00028049,Zv9_00028052,Zv9_00028054;	Zv9_00028054	lincRNA	chr12	1939873	2212017	+	272145	3225	LAST	6	chr12	2209458	2212017	2560	104	4.0625	3.22481	18.8527	exonized	HATN12_DR	DNA/hAT-Ac	chr12	2210318	2210421	+	16.5
ID=chr12:+:gene:1939799:2212017;children=Zv9_00028053,Zv9_00028050,Zv9_00028049,Zv9_00028052,Zv9_00028054;	Zv9_00028054	lincRNA	chr12	1939873	2212017	+	272145	3225	LAST	6	chr12	2209458	2212017	2560	71	2.77344	2.20155	18.8527	exonized	HATN12_DR	DNA/hAT-Ac	chr12	2210102	2210172	+	16.5
ID=chr12:+:gene:22159458:22239008;children=Zv9_00028519;	Zv9_00028519	lincRNA	chr12	22159458	22239008	+	79551	1863	MIDDLE	3	chr12	22226508	22226541	34	34	100	1.82501	25.1744	Both_SPL	ANGEL	DNA/hAT	chr12	22226434	22226571	+	17.6
ID=chr12:+:gene:22159458:22239008;children=Zv9_00028519;	Zv9_00028519	lincRNA	chr12	22159458	22239008	+	79551	1863	LAST	4	chr12	22237467	22239008	1542	58	3.76135	3.11326	25.1744	exonized	IS4EU-2_DR	DNA/Kolobok-IS4EU	chr12	22238593	22238650	+	20.5
ID=chr12:+:gene:22159458:22239008;children=Zv9_00028519;	Zv9_00028519	lincRNA	chr12	22159458	22239008	+	79551	1863	LAST	4	chr12	22237467	22239008	1542	67	4.34501	3.59635	25.1744	PolyA	HATN12_DR	DNA/hAT	chr12	22238942	22239012	-	16.5
ID=chr12:+:gene:22159458:22239008;children=Zv9_00028519;	Zv9_00028519	lincRNA	chr12	22159458	22239008	+	79551	1863	LAST	4	chr12	22237467	22239008	1542	310	20.1038	16.6398	25.1744	exonized	DNA-2-4_DR	DNA	chr12	22238631	22238940	+	16.1
ID=chr12:+:gene:2291165:2296240;children=Zv9_00028057;	Zv9_00028057	lincRNA	chr12	2291165	2296240	+	5076	495	LAST	2	chr12	2295850	2296240	391	78	19.9488	15.7576	20.404	PolyA	TDR18	DNA/hAT-Charlie	chr12	2296163	2296570	-	10.6
ID=chr12:+:gene:2291165:2296240;children=Zv9_00028057;	Zv9_00028057	lincRNA	chr12	2291165	2296240	+	5076	495	LAST	2	chr12	2295850	2296240	391	23	5.88235	4.64646	20.404	PolyA	ENSPM-6_DR	DNA/En-Spm	chr12	2296218	2296620	+	17.5
ID=chr12:+:gene:26729195:26742379;children=Zv9_00028592;	Zv9_00028592	lincRNA	chr12	26729195	26742379	+	13185	1095	LAST	4	chr12	26741662	26742379	718	284	39.5543	25.9361	25.9361	PolyA	DNA-2-30_DR	DNA	chr12	26742096	26742485	+	14
ID=chr12:+:gene:26907789:26948373;children=Zv9_00028599,Zv9_00028598,Zv9_00028600;	Zv9_00028599	lincRNA	chr12	26909929	26917243	+	7315	3013	LAST	2	chr12	26914507	26917243	2737	1175	42.9302	38.9977	60.239	PolyA	Tc1-1_DR	DNA/TcMar-Tc1	chr12	26916069	26917429	-	13.1
ID=chr12:+:gene:26907789:26948373;children=Zv9_00028599,Zv9_00028598,Zv9_00028600;	Zv9_00028599	lincRNA	chr12	26909929	26917243	+	7315	3013	LAST	2	chr12	26914507	26917243	2737	640	23.3833	21.2413	60.239	exonized	TZF28B	DNA/TcMar-Tc1	chr12	26915421	26916060	+	10.6
ID=chr12:+:gene:26907789:26948373;children=Zv9_00028599,Zv9_00028598,Zv9_00028600;	Zv9_00028600	lincRNA	chr12	26909971	26948373	+	38403	759	LAST	4	chr12	26948257	26948373	117	117	100	15.415	15.415	PolyA_SPL	TDR13	DNA	chr12	26947957	26948511	-	15.4
ID=chr12:+:gene:30481685:30493587;children=UL_078,UL_079;	UL_079	lincRNA	chr12	30490395	30493587	+	3193	3193	SINGLE	1	chr12	30490395	30493587	3193	256	8.01754	8.01754	8.01754	exonized	Mariner-N7_DR	DNA/TcMar	chr12	30491532	30491787	+	13.8
ID=chr12:+:gene:30860813:30921355;children=Zv9_00028729,Zv9_00028730;	Zv9_00028729	lincRNA	chr12	30860813	30921355	+	60543	906	LAST	2	chr12	30920598	30921355	758	99	13.0607	10.9272	10.9272	PolyA	Kolobok-N5_DR	DNA/Kolobok?	chr12	30921257	30921493	+	14.6
ID=chr12:+:gene:30860813:30921355;children=Zv9_00028729,Zv9_00028730;	Zv9_00028730	lincRNA	chr12	30860813	30921355	+	60543	1019	MIDDLE	2	chr12	30880344	30880456	113	92	81.4159	9.02846	18.7439	SPL	DNA13TA1_DR	DNA/TcMar-Tc1	chr12	30880334	30880435	-	15.4
ID=chr12:+:gene:30860813:30921355;children=Zv9_00028729,Zv9_00028730;	Zv9_00028730	lincRNA	chr12	30860813	30921355	+	60543	1019	LAST	3	chr12	30920598	30921355	758	99	13.0607	9.71541	18.7439	PolyA	Kolobok-N5_DR	DNA/Kolobok?	chr12	30921257	30921493	+	14.6
ID=chr12:+:gene:34119656:34183156;children=UL_081;	UL_081	lincRNA	chr12	34119656	34183156	+	63501	742	FIRST	1	chr12	34119656	34119737	82	51	62.1951	6.87332	6.87332	SPL	DIRS-N3_DR	LTR/Ngaro	chr12	34119687	34120138	-	18.2
ID=chr12:+:gene:36470439:36477132;children=UL_082,UL_084,UL_083;	UL_082	lincRNA	chr12	36470439	36475859	+	5421	1511	FIRST	1	chr12	36470439	36471261	823	247	30.0122	16.3468	16.3468	exonized	CR1-3_DR	LINE/L2	chr12	36470569	36470815	-	11.4
ID=chr12:+:gene:36470439:36477132;children=UL_082,UL_084,UL_083;	UL_083	lincRNA	chr12	36470439	36477132	+	6694	2784	FIRST	1	chr12	36470439	36471261	823	247	30.0122	8.87213	24.533	exonized	CR1-3_DR	LINE/L2	chr12	36470569	36470815	-	11.4
ID=chr12:+:gene:36470439:36477132;children=UL_082,UL_084,UL_083;	UL_083	lincRNA	chr12	36470439	36477132	+	6694	2784	LAST	4	chr12	36475417	36477132	1716	277	16.1422	9.94971	24.533	exonized	TDR19	DNA/hAT	chr12	36476669	36476945	-	19.4
ID=chr12:+:gene:36470439:36477132;children=UL_082,UL_084,UL_083;	UL_083	lincRNA	chr12	36470439	36477132	+	6694	2784	LAST	4	chr12	36475417	36477132	1716	159	9.26573	5.71121	24.533	exonized	DNA-8-34_DR	DNA/hAT-Tip100	chr12	36476552	36476710	-	13.8
ID=chr12:+:gene:36470439:36477132;children=UL_082,UL_084,UL_083;	UL_084	lincRNA	chr12	36470439	36476210	+	5772	1862	FIRST	1	chr12	36470439	36471261	823	247	30.0122	13.2653	13.2653	exonized	CR1-3_DR	LINE/L2	chr12	36470569	36470815	-	11.4
ID=chr12:+:gene:36771722:36841760;children=UL_085;	UL_085	lincRNA	chr12	36771722	36841760	+	70039	566	MIDDLE	3	chr12	36776879	36776992	114	15	13.1579	2.65018	2.65018	SPL	DNA-X-2B_DR	DNA	chr12	36776978	36777415	+	12.7
ID=chr12:+:gene:36944175:36997532;children=Zv9_00028884;	Zv9_00028884	lincRNA	chr12	36944175	36997532	+	53358	447	LAST	2	chr12	36997479	36997532	54	54	100	12.0805	12.0805	PolyA_SPL	TDR13	DNA	chr12	36997057	36997763	-	15.4
ID=chr12:+:gene:37524352:37551408;children=Zv9_00028888;	Zv9_00028888	lincRNA	chr12	37524352	37551408	+	27057	946	LAST	3	chr12	37550542	37551408	867	13	1.49942	1.37421	1.37421	PolyA	DNA-5-2_DR	DNA/hAT-Tip100	chr12	37551396	37551918	+	12.6
ID=chr12:+:gene:38752362:38809266;children=Zv9_00028932,Zv9_00028930,Zv9_00028931;	Zv9_00028930	lincRNA	chr12	38752362	38809256	+	56895	931	FIRST	1	chr12	38752362	38752467	106	106	100	11.3856	11.3856	TSS_SPL	DNA-6-N1_DR	DNA	chr12	38752213	38752822	-	16.2
ID=chr12:+:gene:38752362:38809266;children=Zv9_00028932,Zv9_00028930,Zv9_00028931;	Zv9_00028931	lincRNA	chr12	38752362	38809256	+	56895	1007	FIRST	1	chr12	38752362	38752467	106	106	100	10.5263	10.5263	TSS_SPL	DNA-6-N1_DR	DNA	chr12	38752213	38752822	-	16.2
ID=chr12:+:gene:38752362:38809266;children=Zv9_00028932,Zv9_00028930,Zv9_00028931;	Zv9_00028932	lincRNA	chr12	38752452	38809266	+	56815	700	FIRST	1	chr12	38752452	38752467	16	16	100	2.28571	2.28571	TSS_SPL	DNA-6-N1_DR	DNA	chr12	38752213	38752822	-	16.2
ID=chr12:+:gene:44135842:44147664;children=Zv9_00028968;	Zv9_00028968	lincRNA	chr12	44135842	44147664	+	11823	5777	LAST	4	chr12	44142179	44147664	5486	237	4.32009	4.10248	6.11044	exonized	HE1_DR1	SINE/V	chr12	44145200	44145436	-	13.2
ID=chr12:+:gene:44135842:44147664;children=Zv9_00028968;	Zv9_00028968	lincRNA	chr12	44135842	44147664	+	11823	5777	LAST	4	chr12	44142179	44147664	5486	116	2.11447	2.00796	6.11044	exonized	HE1_DR1	SINE/V	chr12	44145069	44145184	-	13.2
ID=chr12:+:gene:49534526:49596444;children=Zv9_00029074;	Zv9_00029074	lincRNA	chr12	49534526	49596444	+	61919	485	FIRST	1	chr12	49534526	49534974	449	36	8.01782	7.42268	7.42268	TSS	DNA-8-28_DR	DNA/P?	chr12	49534501	49534561	-	16.2
ID=chr12:+:gene:8705940:8708885;children=Zv9_00028216;	Zv9_00028216	lincRNA	chr12	8705940	8708885	+	2946	2074	FIRST	1	chr12	8705940	8705965	26	26	100	1.25362	45.2266	TSS_SPL	HATN8_DR	DNA	chr12	8705760	8705992	+	12.7
ID=chr12:+:gene:8705940:8708885;children=Zv9_00028216;	Zv9_00028216	lincRNA	chr12	8705940	8708885	+	2946	2074	LAST	2	chr12	8706838	8708885	2048	237	11.5723	11.4272	45.2266	exonized	HATN8_DR	DNA	chr12	8707943	8708179	+	12.7
ID=chr12:+:gene:8705940:8708885;children=Zv9_00028216;	Zv9_00028216	lincRNA	chr12	8705940	8708885	+	2946	2074	LAST	2	chr12	8706838	8708885	2048	214	10.4492	10.3182	45.2266	exonized	HATN8_DR	DNA	chr12	8707533	8707746	+	12.7
ID=chr12:+:gene:8705940:8708885;children=Zv9_00028216;	Zv9_00028216	lincRNA	chr12	8705940	8708885	+	2946	2074	LAST	2	chr12	8706838	8708885	2048	202	9.86328	9.73963	45.2266	exonized	HATN8_DR	DNA	chr12	8707115	8707316	+	12.7
ID=chr12:+:gene:8705940:8708885;children=Zv9_00028216;	Zv9_00028216	lincRNA	chr12	8705940	8708885	+	2946	2074	LAST	2	chr12	8706838	8708885	2048	233	11.377	11.2343	45.2266	exonized	HATN8_DR	DNA	chr12	8706876	8707108	+	12.7
ID=chr12:+:gene:8705940:8708885;children=Zv9_00028216;	Zv9_00028216	lincRNA	chr12	8705940	8708885	+	2946	2074	LAST	2	chr12	8706838	8708885	2048	26	1.26953	1.25362	45.2266	SPL	HATN8_DR	DNA	chr12	8706630	8706863	+	12.7
ID=chr13:-:gene:1132442:1136578;children=UL_093;	UL_093	lincRNA	chr13	1132442	1136578	-	4137	3997	LAST	2	chr13	1132442	1136414	3973	206	5.185	5.15387	57.7183	exonized	hAT-N22_DR	DNA/hAT	chr13	1134826	1135031	-	14.3
ID=chr13:-:gene:1132442:1136578;children=UL_093;	UL_093	lincRNA	chr13	1132442	1136578	-	4137	3997	LAST	2	chr13	1132442	1136414	3973	35	0.880946	0.875657	57.7183	exonized	hAT-N22_DR	DNA/hAT	chr13	1133630	1133664	-	14.3
ID=chr13:-:gene:1132442:1136578;children=UL_093;	UL_093	lincRNA	chr13	1132442	1136578	-	4137	3997	LAST	2	chr13	1132442	1136414	3973	50	1.25849	1.25094	57.7183	exonized	hAT-2n1_DR	DNA/hAT-Charlie	chr13	1135454	1135503	-	13.2
ID=chr13:-:gene:1132442:1136578;children=UL_093;	UL_093	lincRNA	chr13	1132442	1136578	-	4137	3997	LAST	2	chr13	1132442	1136414	3973	345	8.68361	8.63147	57.7183	exonized	TDR5	DNA/En-Spm	chr13	1133283	1133627	-	12.7
ID=chr13:-:gene:1132442:1136578;children=UL_093;	UL_093	lincRNA	chr13	1132442	1136578	-	4137	3997	LAST	2	chr13	1132442	1136414	3973	76	1.91291	1.90143	57.7183	exonized	Mariner-N2_DR	DNA/TcMar	chr13	1135495	1135570	+	16.5
ID=chr13:-:gene:1132442:1136578;children=UL_093;	UL_093	lincRNA	chr13	1132442	1136578	-	4137	3997	LAST	2	chr13	1132442	1136414	3973	63	1.5857	1.57618	57.7183	exonized	HATN14_DR	DNA/hAT	chr13	1135032	1135094	+	16.6
ID=chr13:-:gene:1132442:1136578;children=UL_093;	UL_093	lincRNA	chr13	1132442	1136578	-	4137	3997	LAST	2	chr13	1132442	1136414	3973	127	3.19658	3.17738	57.7183	exonized	DNA-TA-1_DR	DNA/TcMar-Tc1	chr13	1133023	1133149	-	13
ID=chr13:-:gene:1132442:1136578;children=UL_093;	UL_093	lincRNA	chr13	1132442	1136578	-	4137	3997	LAST	2	chr13	1132442	1136414	3973	1161	29.2223	29.0468	57.7183	exonized	DNA-8-3_DR	DNA	chr13	1133665	1134825	+	12.1
ID=chr13:-:gene:1132442:1136578;children=UL_093;	UL_093	lincRNA	chr13	1132442	1136578	-	4137	3997	LAST	2	chr13	1132442	1136414	3973	70	1.76189	1.75131	57.7183	exonized	DNA-8-14_DR	DNA/hAT-Charlie	chr13	1135571	1135640	+	11.4
ID=chr13:-:gene:1132442:1136578;children=UL_093;	UL_093	lincRNA	chr13	1132442	1136578	-	4137	3997	LAST	2	chr13	1132442	1136414	3973	88	2.21495	2.20165	57.7183	exonized	DNA-2-30_DR	DNA	chr13	1133192	1133279	-	14
ID=chr13:-:gene:1132442:1136578;children=UL_093;	UL_093	lincRNA	chr13	1132442	1136578	-	4137	3997	LAST	2	chr13	1132442	1136414	3973	86	2.16461	2.15161	57.7183	exonized	DNA-2-30_DR	DNA	chr13	1133181	1133266	+	14
ID=chr13:-:gene:26776691:26927690;children=Zv9_00031795,Zv9_00031796,Zv9_00031797;	Zv9_00031795	lincRNA	chr13	26776691	26927690	-	151000	1873	LAST	4	chr13	26776691	26778080	1390	143	10.2878	7.63481	7.63481	PolyA	DNA-1-6_DR	DNA	chr13	26776250	26776833	-	16.8
ID=chr13:-:gene:26776691:26927690;children=Zv9_00031795,Zv9_00031796,Zv9_00031797;	Zv9_00031796	lincRNA	chr13	26884585	26927690	-	43106	500	LAST	3	chr13	26884585	26884715	131	55	41.9847	11	11	PolyA	TDR13	DNA	chr13	26884419	26884639	+	15.4
ID=chr13:-:gene:33484735:33491201;children=UL_102;	UL_102	lincRNA	chr13	33484735	33491201	-	6467	4619	LAST	#VALUE!	chr13	33484735	33489094	4360	49	1.12385	1.06084	26.1961	exonized	hAT-N21_DR	DNA/hAT-Charlie	chr13	33487477	33487525	+	14.2
ID=chr13:-:gene:33484735:33491201;children=UL_102;	UL_102	lincRNA	chr13	33484735	33491201	-	6467	4619	LAST	#VALUE!	chr13	33484735	33489094	4360	275	6.30734	5.95367	26.1961	exonized	HATN13_DR	DNA/hAT-Ac	chr13	33487246	33487520	+	12.2
ID=chr13:-:gene:33484735:33491201;children=UL_102;	UL_102	lincRNA	chr13	33484735	33491201	-	6467	4619	LAST	#VALUE!	chr13	33484735	33489094	4360	208	4.77064	4.50314	26.1961	exonized	HATN13_DR	DNA/hAT-Ac	chr13	33486365	33486572	+	12.2
ID=chr13:-:gene:33484735:33491201;children=UL_102;	UL_102	lincRNA	chr13	33484735	33491201	-	6467	4619	LAST	#VALUE!	chr13	33484735	33489094	4360	292	6.69725	6.32171	26.1961	exonized	EnSpmN1_DR	DNA/En-Spm	chr13	33486959	33487250	+	19.2
ID=chr13:-:gene:33484735:33491201;children=UL_102;	UL_102	lincRNA	chr13	33484735	33491201	-	6467	4619	LAST	#VALUE!	chr13	33484735	33489094	4360	386	8.85321	8.35679	26.1961	exonized	DNA-8-2_DR	DNA/hAT	chr13	33486573	33486958	+	11.6
ID=chr13:-:gene:36989636:37014025;children=Zv9_00032053;	Zv9_00032053	lincRNA	chr13	36989636	37014025	-	24390	337	LAST	3	chr13	36989636	36989751	116	116	100	34.4214	34.4214	PolyA_SPL	SINE2-1_DR	SINE/tRNA	chr13	36989606	36989771	+	19.1
ID=chr13:-:gene:45941307:45968471;children=Zv9_00032233;	Zv9_00032233	lincRNA	chr13	45941307	45968471	-	27165	3603	FIRST	1	chr13	45968350	45968471	122	122	100	3.38607	59.839	TSS_SPL	DNA-X-9_DR	DNA	chr13	45968205	45968588	-	19.5
ID=chr13:-:gene:45941307:45968471;children=Zv9_00032233;	Zv9_00032233	lincRNA	chr13	45941307	45968471	-	27165	3603	LAST	3	chr13	45941307	45944693	3387	755	22.2911	20.9548	59.839	exonized	TDR13	DNA	chr13	45943331	45944085	+	15.4
ID=chr13:-:gene:45941307:45968471;children=Zv9_00032233;	Zv9_00032233	lincRNA	chr13	45941307	45968471	-	27165	3603	LAST	3	chr13	45941307	45944693	3387	260	7.67641	7.21621	59.839	exonized	Kolobok-N5_DR	DNA/Kolobok?	chr13	45944086	45944345	-	14.6
ID=chr13:-:gene:45941307:45968471;children=Zv9_00032233;	Zv9_00032233	lincRNA	chr13	45941307	45968471	-	27165	3603	LAST	3	chr13	45941307	45944693	3387	117	3.45438	3.24729	59.839	exonized	Kolobok-N5_DR	DNA/Kolobok?	chr13	45943214	45943330	-	14.6
ID=chr13:-:gene:45941307:45968471;children=Zv9_00032233;	Zv9_00032233	lincRNA	chr13	45941307	45968471	-	27165	3603	LAST	3	chr13	45941307	45944693	3387	37	1.09241	1.02692	59.839	PolyA	HE1_DR1	SINE/V	chr13	45940993	45941343	+	13.2
ID=chr13:-:gene:45941307:45968471;children=Zv9_00032233;	Zv9_00032233	lincRNA	chr13	45941307	45968471	-	27165	3603	LAST	3	chr13	45941307	45944693	3387	131	3.86773	3.63586	59.839	exonized	EnSpm-6N1_DR	DNA/En-Spm	chr13	45942560	45942690	+	16.4
ID=chr13:-:gene:45941307:45968471;children=Zv9_00032233;	Zv9_00032233	lincRNA	chr13	45941307	45968471	-	27165	3603	LAST	3	chr13	45941307	45944693	3387	64	1.88958	1.7763	59.839	exonized	DNA8-9_DR	DNA/hAT	chr13	45943093	45943156	-	18
ID=chr13:-:gene:45941307:45968471;children=Zv9_00032233;	Zv9_00032233	lincRNA	chr13	45941307	45968471	-	27165	3603	LAST	3	chr13	45941307	45944693	3387	309	9.12312	8.57619	59.839	exonized	DNA-X-12_DR	DNA	chr13	45942696	45943004	+	17.1
ID=chr13:-:gene:45941307:45968471;children=Zv9_00032233;	Zv9_00032233	lincRNA	chr13	45941307	45968471	-	27165	3603	LAST	3	chr13	45941307	45944693	3387	361	10.6584	10.0194	59.839	exonized	DANA	SINE/V	chr13	45942732	45943092	-	9.7
ID=chr13:-:gene:7532170:7593622;children=UL_096,UL_095;	UL_095	lincRNA	chr13	7532170	7593535	-	61366	5992	LAST	8	chr13	7532170	7536272	4103	368	8.96905	6.14152	41.8057	exonized	hAT-N24_DR	DNA/hAT?	chr13	7534869	7535236	-	11.1
ID=chr13:-:gene:7532170:7593622;children=UL_096,UL_095;	UL_095	lincRNA	chr13	7532170	7593535	-	61366	5992	LAST	8	chr13	7532170	7536272	4103	73	1.77919	1.21829	41.8057	exonized	DNA-8-14_DR	DNA/hAT-Charlie	chr13	7533345	7533417	+	11.4
ID=chr13:-:gene:7532170:7593622;children=UL_096,UL_095;	UL_095	lincRNA	chr13	7532170	7593535	-	61366	5992	LAST	8	chr13	7532170	7536272	4103	655	15.9639	10.9312	41.8057	exonized	DNA-8-14_DR	DNA/hAT-Charlie	chr13	7532680	7533334	+	11.4
ID=chr13:-:gene:7532170:7593622;children=UL_096,UL_095;	UL_095	lincRNA	chr13	7532170	7593535	-	61366	5992	LAST	8	chr13	7532170	7536272	4103	228	5.55691	3.80507	41.8057	exonized	DNA-4-3_DR	DNA	chr13	7535239	7535466	-	9.4
ID=chr13:-:gene:7532170:7593622;children=UL_096,UL_095;	UL_095	lincRNA	chr13	7532170	7593535	-	61366	5992	LAST	8	chr13	7532170	7536272	4103	1181	28.7838	19.7096	41.8057	exonized	DNA-4-3_DR	DNA	chr13	7533688	7534868	-	9.4
ID=chr13:-:gene:7532170:7593622;children=UL_096,UL_095;	UL_096	lincRNA	chr13	7532170	7593622	-	61453	6079	LAST	8	chr13	7532170	7536272	4103	368	8.96905	6.05363	41.2074	exonized	hAT-N24_DR	DNA/hAT?	chr13	7534869	7535236	-	11.1
ID=chr13:-:gene:7532170:7593622;children=UL_096,UL_095;	UL_096	lincRNA	chr13	7532170	7593622	-	61453	6079	LAST	8	chr13	7532170	7536272	4103	73	1.77919	1.20086	41.2074	exonized	DNA-8-14_DR	DNA/hAT-Charlie	chr13	7533345	7533417	+	11.4
ID=chr13:-:gene:7532170:7593622;children=UL_096,UL_095;	UL_096	lincRNA	chr13	7532170	7593622	-	61453	6079	LAST	8	chr13	7532170	7536272	4103	655	15.9639	10.7748	41.2074	exonized	DNA-8-14_DR	DNA/hAT-Charlie	chr13	7532680	7533334	+	11.4
ID=chr13:-:gene:7532170:7593622;children=UL_096,UL_095;	UL_096	lincRNA	chr13	7532170	7593622	-	61453	6079	LAST	8	chr13	7532170	7536272	4103	228	5.55691	3.75062	41.2074	exonized	DNA-4-3_DR	DNA	chr13	7535239	7535466	-	9.4
ID=chr13:-:gene:7532170:7593622;children=UL_096,UL_095;	UL_096	lincRNA	chr13	7532170	7593622	-	61453	6079	LAST	8	chr13	7532170	7536272	4103	1181	28.7838	19.4275	41.2074	exonized	DNA-4-3_DR	DNA	chr13	7533688	7534868	-	9.4
ID=chr13:+:gene:20513105:20655970;children=Zv9_00030628,Zv9_00030627;	Zv9_00030627	lincRNA	chr13	20513105	20521944	+	8840	467	FIRST	1	chr13	20513105	20513405	301	301	100	64.454	64.454	TSS_SPL	Tc1-1_DR	DNA/TcMar-Tc1	chr13	20512785	20513436	+	13.1
ID=chr13:+:gene:20513105:20655970;children=Zv9_00030628,Zv9_00030627;	Zv9_00030628	lincRNA	chr13	20513109	20655970	+	142862	1216	FIRST	1	chr13	20513109	20513405	297	297	100	24.4243	24.4243	TSS_SPL	Tc1-1_DR	DNA/TcMar-Tc1	chr13	20512785	20513436	+	13.1
ID=chr13:+:gene:20995277:20998093;children=Zv9_00030633;	Zv9_00030633	lincRNA	chr13	20995277	20998093	+	2817	358	LAST	3	chr13	20998042	20998093	52	52	100	14.5251	14.5251	PolyA_SPL	DNA8-4_DR	DNA/hAT-Charlie	chr13	20997808	20998862	+	15
ID=chr13:+:gene:2376292:2381118;children=Zv9_00030283;	Zv9_00030283	lincRNA	chr13	2376292	2381118	+	4827	4156	FIRST	1	chr13	2376292	2376336	45	45	100	1.08277	50.1925	TSS_SPL	Tc1-6_DR	DNA/TcMar-Tc1	chr13	2375322	2376504	+	5.8
ID=chr13:+:gene:2376292:2381118;children=Zv9_00030283;	Zv9_00030283	lincRNA	chr13	2376292	2381118	+	4827	4156	LAST	2	chr13	2377008	2381118	4111	188	4.5731	4.52358	50.1925	SPL	Tc1-6_DR	DNA/TcMar-Tc1	chr13	2376605	2377195	+	5.8
ID=chr13:+:gene:2376292:2381118;children=Zv9_00030283;	Zv9_00030283	lincRNA	chr13	2376292	2381118	+	4827	4156	LAST	2	chr13	2377008	2381118	4111	160	3.892	3.84986	50.1925	exonized	SINE2-1_DR	SINE/tRNA	chr13	2379619	2379778	+	19.1
ID=chr13:+:gene:2376292:2381118;children=Zv9_00030283;	Zv9_00030283	lincRNA	chr13	2376292	2381118	+	4827	4156	LAST	2	chr13	2377008	2381118	4111	176	4.2812	4.23484	50.1925	exonized	Kolobok-N3_DR	DNA/Kolobok?	chr13	2378402	2378577	-	15.6
ID=chr13:+:gene:2376292:2381118;children=Zv9_00030283;	Zv9_00030283	lincRNA	chr13	2376292	2381118	+	4827	4156	LAST	2	chr13	2377008	2381118	4111	322	7.83264	7.74783	50.1925	exonized	Harbinger-N13_DR	DNA/Harbinger	chr13	2378588	2378909	-	12.2
ID=chr13:+:gene:2376292:2381118;children=Zv9_00030283;	Zv9_00030283	lincRNA	chr13	2376292	2381118	+	4827	4156	LAST	2	chr13	2377008	2381118	4111	155	3.77037	3.72955	50.1925	exonized	HATN8_DR	DNA	chr13	2379779	2379933	-	12.7
ID=chr13:+:gene:2376292:2381118;children=Zv9_00030283;	Zv9_00030283	lincRNA	chr13	2376292	2381118	+	4827	4156	LAST	2	chr13	2377008	2381118	4111	87	2.11627	2.09336	50.1925	exonized	HATN8_DR	DNA	chr13	2379090	2379176	-	12.7
ID=chr13:+:gene:2376292:2381118;children=Zv9_00030283;	Zv9_00030283	lincRNA	chr13	2376292	2381118	+	4827	4156	LAST	2	chr13	2377008	2381118	4111	367	8.92727	8.83061	50.1925	exonized	HATN10_DR	DNA/hAT	chr13	2379252	2379618	-	12.3
ID=chr13:+:gene:2376292:2381118;children=Zv9_00030283;	Zv9_00030283	lincRNA	chr13	2376292	2381118	+	4827	4156	LAST	2	chr13	2377008	2381118	4111	181	4.40282	4.35515	50.1925	exonized	EnSpm-6N1_DR	DNA/En-Spm	chr13	2379198	2379378	+	16.4
ID=chr13:+:gene:2376292:2381118;children=Zv9_00030283;	Zv9_00030283	lincRNA	chr13	2376292	2381118	+	4827	4156	LAST	2	chr13	2377008	2381118	4111	248	6.0326	5.96728	50.1925	exonized	DNA-8-28_DR	DNA/P?	chr13	2379980	2380227	-	16.2
ID=chr13:+:gene:2376292:2381118;children=Zv9_00030283;	Zv9_00030283	lincRNA	chr13	2376292	2381118	+	4827	4156	LAST	2	chr13	2377008	2381118	4111	157	3.81902	3.77767	50.1925	exonized	DNA-8-28_DR	DNA/P?	chr13	2378922	2379078	-	16.2
ID=chr13:+:gene:27450195:27456463;children=UL_101;	UL_101	lincRNA	chr13	27450195	27456463	+	6269	2444	FIRST	1	chr13	27450195	27451471	1277	340	26.6249	13.9116	30.0327	exonized	hAT-N51_DR	DNA/hAT-Ac	chr13	27450657	27450996	-	11.6
ID=chr13:+:gene:27450195:27456463;children=UL_101;	UL_101	lincRNA	chr13	27450195	27456463	+	6269	2444	FIRST	1	chr13	27450195	27451471	1277	394	30.8536	16.1211	30.0327	TSS	TDR18	DNA/hAT-Charlie	chr13	27450161	27450588	+	10.6
ID=chr13:+:gene:27593199:27607401;children=Zv9_00030804;	Zv9_00030804	lincRNA	chr13	27593199	27607401	+	14203	2056	LAST	3	chr13	27605542	27607401	1860	286	15.3763	13.9105	13.9105	PolyA	TDR18	DNA/hAT-Charlie	chr13	27607116	27607645	-	10.6
ID=chr13:+:gene:28009226:28027481;children=Zv9_00030806;	Zv9_00030806	lincRNA	chr13	28009226	28027481	+	18256	1549	LAST	2	chr13	28026466	28027481	1016	215	21.1614	13.8799	13.8799	PolyA	TDR7	DNA	chr13	28027267	28027753	+	12.5
ID=chr13:+:gene:34975150:34995046;children=Zv9_00030999;	Zv9_00030999	lincRNA	chr13	34975150	34995046	+	19897	783	FIRST	1	chr13	34975150	34975301	152	144	94.7368	18.3908	36.7816	SPL	DNA-X-2B_DR	DNA	chr13	34975158	34975515	-	12.7
ID=chr13:+:gene:34975150:34995046;children=Zv9_00030999;	Zv9_00030999	lincRNA	chr13	34975150	34995046	+	19897	783	MIDDLE	2	chr13	34975457	34975615	159	59	37.1069	7.53512	36.7816	SPL	DNA-X-2B_DR	DNA	chr13	34975158	34975515	-	12.7
ID=chr13:+:gene:34975150:34995046;children=Zv9_00030999;	Zv9_00030999	lincRNA	chr13	34975150	34995046	+	19897	783	LAST	3	chr13	34994575	34995046	472	85	18.0085	10.8557	36.7816	SPL	Kolobok-N5_DR	DNA/Kolobok?	chr13	34994399	34994659	-	14.6
ID=chr13:+:gene:3987367:3990486;children=Zv9_00030305;	Zv9_00030305	lincRNA	chr13	3987367	3990486	+	3120	889	LAST	2	chr13	3989871	3990486	616	90	14.6104	10.1237	48.9314	exonized	ZFERV-2-I_DR-int	LTR/ERV1	chr13	3990373	3990462	+	19.1
ID=chr13:+:gene:3987367:3990486;children=Zv9_00030305;	Zv9_00030305	lincRNA	chr13	3987367	3990486	+	3120	889	LAST	2	chr13	3989871	3990486	616	110	17.8571	12.3735	48.9314	exonized	LOOPERN4B_DR	DNA/PiggyBac	chr13	3990142	3990251	+	12.4
ID=chr13:+:gene:3987367:3990486;children=Zv9_00030305;	Zv9_00030305	lincRNA	chr13	3987367	3990486	+	3120	889	LAST	2	chr13	3989871	3990486	616	52	8.44156	5.84927	48.9314	PolyA	Helitron-N2_DR	DNA/Helitron	chr13	3990435	3990921	+	15
ID=chr13:+:gene:3987367:3990486;children=Zv9_00030305;	Zv9_00030305	lincRNA	chr13	3987367	3990486	+	3120	889	LAST	2	chr13	3989871	3990486	616	98	15.9091	11.0236	48.9314	PolyA	Helitron-N2_DR	DNA/Helitron	chr13	3990389	3990499	-	15
ID=chr13:+:gene:3987367:3990486;children=Zv9_00030305;	Zv9_00030305	lincRNA	chr13	3987367	3990486	+	3120	889	LAST	2	chr13	3989871	3990486	616	74	12.013	8.32396	48.9314	PolyA	EnSpm-N2_DR	DNA/En-Spm	chr13	3990413	3990531	-	14
ID=chr13:+:gene:3987367:3990486;children=Zv9_00030305;	Zv9_00030305	lincRNA	chr13	3987367	3990486	+	3120	889	LAST	2	chr13	3989871	3990486	616	11	1.78571	1.23735	48.9314	exonized	DNA-2-12_DR	DNA/En-Spm?	chr13	3990362	3990372	+	16.6
ID=chr13:+:gene:4319547:4321252;children=Zv9_00030320;	Zv9_00030320	lincRNA	chr13	4319547	4321252	+	1706	364	LAST	2	chr13	4320988	4321252	265	72	27.1698	19.7802	19.7802	PolyA	TDR18	DNA	chr13	4321181	4321326	-	10.6
ID=chr13:+:gene:43196941:43204415;children=UL_103;	UL_103	lincRNA	chr13	43196941	43204415	+	7475	1998	LAST	4	chr13	43202674	43204415	1742	511	29.3341	25.5756	40.4905	exonized	TDR18	DNA/hAT-Charlie	chr13	43203574	43204084	+	10.6
ID=chr13:+:gene:43196941:43204415;children=UL_103;	UL_103	lincRNA	chr13	43196941	43204415	+	7475	1998	LAST	4	chr13	43202674	43204415	1742	177	10.1607	8.85886	40.4905	exonized	Mariner-N1_DR	DNA/TcMar	chr13	43203121	43203297	+	15.5
ID=chr13:+:gene:43196941:43204415;children=UL_103;	UL_103	lincRNA	chr13	43196941	43204415	+	7475	1998	LAST	4	chr13	43202674	43204415	1742	16	0.918485	0.800801	40.4905	exonized	EnSpm-N2_DR	DNA/En-Spm	chr13	43203558	43203573	-	14
ID=chr13:+:gene:43196941:43204415;children=UL_103;	UL_103	lincRNA	chr13	43196941	43204415	+	7475	1998	LAST	4	chr13	43202674	43204415	1742	105	6.02755	5.25526	40.4905	exonized	Copia-8-LTR_DR	LTR/Gypsy?	chr13	43204273	43204377	+	20.5
ID=chr13:+:gene:5074177:5077856;children=Zv9_00030331;	Zv9_00030331	lincRNA	chr13	5074177	5077856	+	3680	1409	FIRST	1	chr13	5074177	5075041	865	843	97.4566	59.8297	63.3073	TSS	Kolobok-1N1_DR	DNA/Kolobok	chr13	5074027	5075019	+	10.5
ID=chr13:+:gene:5074177:5077856;children=Zv9_00030331;	Zv9_00030331	lincRNA	chr13	5074177	5077856	+	3680	1409	FIRST	1	chr13	5074177	5075041	865	22	2.54335	1.56139	63.3073	SPL	HATN8_DR	DNA	chr13	5075020	5075274	-	12.7
ID=chr13:+:gene:5074177:5077856;children=Zv9_00030331;	Zv9_00030331	lincRNA	chr13	5074177	5077856	+	3680	1409	LAST	2	chr13	5077313	5077856	544	27	4.96324	1.91625	63.3073	PolyA	CR1-5_DR	LINE/L2	chr13	5077830	5078036	+	12.2
ID=chr13:+:gene:7215912:7242113;children=Zv9_00030367;	Zv9_00030367	lincRNA	chr13	7215912	7242113	+	26202	840	LAST	2	chr13	7241449	7242113	665	665	100	79.1667	79.1667	PolyA_SPL	CR1-2_DR	LINE/L2	chr13	7240868	7243801	+	9.9
ID=chr14:-:gene:10806077:10817735;children=UL_111;	UL_111	lincRNA	chr14	10806077	10817735	-	11659	2791	FIRST	1	chr14	10816240	10817735	1496	1135	75.869	40.6664	40.6664	TSS	DNA-AT-2_DR	DNA	chr14	10816601	10817914	+	11.8
ID=chr14:-:gene:1668370:1672051;children=UL_107;	UL_107	lincRNA	chr14	1668370	1672051	-	3682	3682	SINGLE	1	chr14	1668370	1672051	3682	220	5.97501	5.97501	64.6659	exonized	hAT-N29_DR	DNA/hAT	chr14	1668738	1668957	+	17.4
ID=chr14:-:gene:1668370:1672051;children=UL_107;	UL_107	lincRNA	chr14	1668370	1672051	-	3682	3682	SINGLE	1	chr14	1668370	1672051	3682	303	8.22922	8.22922	64.6659	exonized	TDR13	DNA	chr14	1671299	1671601	+	15.4
ID=chr14:-:gene:1668370:1672051;children=UL_107;	UL_107	lincRNA	chr14	1668370	1672051	-	3682	3682	SINGLE	1	chr14	1668370	1672051	3682	124	3.36773	3.36773	64.6659	exonized	TDR13	DNA	chr14	1671203	1671326	+	15.4
ID=chr14:-:gene:1668370:1672051;children=UL_107;	UL_107	lincRNA	chr14	1668370	1672051	-	3682	3682	SINGLE	1	chr14	1668370	1672051	3682	118	3.20478	3.20478	64.6659	exonized	TDR13	DNA	chr14	1671115	1671232	+	15.4
ID=chr14:-:gene:1668370:1672051;children=UL_107;	UL_107	lincRNA	chr14	1668370	1672051	-	3682	3682	SINGLE	1	chr14	1668370	1672051	3682	124	3.36773	3.36773	64.6659	exonized	TDR13	DNA	chr14	1671017	1671140	+	15.4
ID=chr14:-:gene:1668370:1672051;children=UL_107;	UL_107	lincRNA	chr14	1668370	1672051	-	3682	3682	SINGLE	1	chr14	1668370	1672051	3682	122	3.31342	3.31342	64.6659	exonized	TDR13	DNA	chr14	1670927	1671048	+	15.4
ID=chr14:-:gene:1668370:1672051;children=UL_107;	UL_107	lincRNA	chr14	1668370	1672051	-	3682	3682	SINGLE	1	chr14	1668370	1672051	3682	42	1.14068	1.14068	64.6659	exonized	TDR13	DNA	chr14	1670687	1670728	+	15.4
ID=chr14:-:gene:1668370:1672051;children=UL_107;	UL_107	lincRNA	chr14	1668370	1672051	-	3682	3682	SINGLE	1	chr14	1668370	1672051	3682	51	1.38512	1.38512	64.6659	exonized	TDR13	DNA	chr14	1670363	1670413	+	15.4
ID=chr14:-:gene:1668370:1672051;children=UL_107;	UL_107	lincRNA	chr14	1668370	1672051	-	3682	3682	SINGLE	1	chr14	1668370	1672051	3682	45	1.22216	1.22216	64.6659	exonized	TDR13	DNA	chr14	1670088	1670132	+	15.4
ID=chr14:-:gene:1668370:1672051;children=UL_107;	UL_107	lincRNA	chr14	1668370	1672051	-	3682	3682	SINGLE	1	chr14	1668370	1672051	3682	116	3.15046	3.15046	64.6659	exonized	TDR13	DNA	chr14	1670000	1670115	+	15.4
ID=chr14:-:gene:1668370:1672051;children=UL_107;	UL_107	lincRNA	chr14	1668370	1672051	-	3682	3682	SINGLE	1	chr14	1668370	1672051	3682	60	1.62955	1.62955	64.6659	exonized	TDR13	DNA	chr14	1669696	1669755	+	15.4
ID=chr14:-:gene:1668370:1672051;children=UL_107;	UL_107	lincRNA	chr14	1668370	1672051	-	3682	3682	SINGLE	1	chr14	1668370	1672051	3682	109	2.96035	2.96035	64.6659	exonized	TDR13	DNA	chr14	1669545	1669653	+	15.4
ID=chr14:-:gene:1668370:1672051;children=UL_107;	UL_107	lincRNA	chr14	1668370	1672051	-	3682	3682	SINGLE	1	chr14	1668370	1672051	3682	125	3.39489	3.39489	64.6659	exonized	Polinton-2N1_DR	DNA/Maverick	chr14	1669874	1669998	-	18
ID=chr14:-:gene:1668370:1672051;children=UL_107;	UL_107	lincRNA	chr14	1668370	1672051	-	3682	3682	SINGLE	1	chr14	1668370	1672051	3682	324	8.79957	8.79957	64.6659	exonized	HE1_DR1	SINE/V	chr14	1668610	1668933	+	13.2
ID=chr14:-:gene:1668370:1672051;children=UL_107;	UL_107	lincRNA	chr14	1668370	1672051	-	3682	3682	SINGLE	1	chr14	1668370	1672051	3682	40	1.08637	1.08637	64.6659	exonized	DNA11TA1_DR	DNA/TcMar-Tc1	chr14	1670838	1670877	-	14.2
ID=chr14:-:gene:1668370:1672051;children=UL_107;	UL_107	lincRNA	chr14	1668370	1672051	-	3682	3682	SINGLE	1	chr14	1668370	1672051	3682	99	2.68876	2.68876	64.6659	exonized	DNA11TA1_DR	DNA/TcMar-Tc1	chr14	1670467	1670565	-	14.2
ID=chr14:-:gene:1668370:1672051;children=UL_107;	UL_107	lincRNA	chr14	1668370	1672051	-	3682	3682	SINGLE	1	chr14	1668370	1672051	3682	201	5.45899	5.45899	64.6659	exonized	DNA11TA1_DR	DNA/TcMar-Tc1	chr14	1670136	1670336	-	14.2
ID=chr14:-:gene:1668370:1672051;children=UL_107;	UL_107	lincRNA	chr14	1668370	1672051	-	3682	3682	SINGLE	1	chr14	1668370	1672051	3682	158	4.29115	4.29115	64.6659	exonized	DNA11TA1_DR	DNA/TcMar-Tc1	chr14	1669826	1669983	+	14.2
ID=chr14:-:gene:17228182:17270812;children=Zv9_00033658;	Zv9_00033658	lincRNA	chr14	17228182	17270812	-	42631	1260	MIDDLE	2	chr14	17268039	17268092	54	54	100	4.28571	67.0635	Both_SPL	DNA-6-N5_DR	DNA	chr14	17267912	17268705	+	17.4
ID=chr14:-:gene:17228182:17270812;children=Zv9_00033658;	Zv9_00033658	lincRNA	chr14	17228182	17270812	-	42631	1260	LAST	4	chr14	17228182	17229215	1034	599	57.9304	47.5397	67.0635	exonized	ERV2_DR-LTR	LTR/ERV1	chr14	17228403	17229001	-	13.6
ID=chr14:-:gene:17228182:17270812;children=Zv9_00033658;	Zv9_00033658	lincRNA	chr14	17228182	17270812	-	42631	1260	LAST	4	chr14	17228182	17229215	1034	192	18.5687	15.2381	67.0635	PolyA	DNA25TWA1_DR	DNA	chr14	17227978	17228373	-	14.4
ID=chr14:-:gene:176793:182388;children=UL_105;	UL_105	lincRNA	chr14	176793	182388	-	5596	5596	SINGLE	1	chr14	176793	182388	5596	580	10.3645	10.3645	13.0093	exonized	TDR2	DNA/TcMar-Tc1	chr14	177829	178408	-	8.1
ID=chr14:-:gene:176793:182388;children=UL_105;	UL_105	lincRNA	chr14	176793	182388	-	5596	5596	SINGLE	1	chr14	176793	182388	5596	148	2.64475	2.64475	13.0093	exonized	Polinton-1_DR	DNA/Maverick	chr14	178848	178995	+	20.5
ID=chr14:-:gene:32941575:32958996;children=Zv9_00033951;	Zv9_00033951	lincRNA	chr14	32941575	32958996	-	17422	6518	LAST	2	chr14	32941575	32947862	6288	99	1.57443	1.51887	1.51887	exonized	ANGEL	DNA/hAT	chr14	32945502	32945600	+	17.6
ID=chr14:-:gene:35980536:35983003;children=UL_122;	UL_122	lincRNA	chr14	35980536	35983003	-	2468	2468	SINGLE	1	chr14	35980536	35983003	2468	136	5.51053	5.51053	9.11669	exonized	DNA-TA-2_DR	DNA	chr14	35981713	35981848	+	13.4
ID=chr14:-:gene:35980536:35983003;children=UL_122;	UL_122	lincRNA	chr14	35980536	35983003	-	2468	2468	SINGLE	1	chr14	35980536	35983003	2468	89	3.60616	3.60616	9.11669	exonized	DNA-8-9_DR	DNA/hAT-Ac?	chr14	35980976	35981064	+	18.1
ID=chr14:-:gene:37152912:37493247;children=Zv9_00034071;	Zv9_00034071	lincRNA	chr14	37152912	37493247	-	340336	1283	LAST	5	chr14	37152912	37153813	902	90	9.97783	7.01481	7.01481	exonized	Polinton-1_DR	DNA/Maverick	chr14	37153130	37153219	-	20.5
ID=chr14:-:gene:45313976:45471396;children=Zv9_00034191;	Zv9_00034191	lincRNA	chr14	45313976	45471396	-	157421	583	FIRST	1	chr14	45471346	45471396	51	51	100	8.74786	8.74786	TSS_SPL	DNA-X-2_DR	DNA	chr14	45471089	45471552	+	14.2
ID=chr14:-:gene:45579849:45773402;children=Zv9_00034192;	Zv9_00034192	lincRNA	chr14	45579849	45773402	-	193554	322	LAST	3	chr14	45579849	45579974	126	126	100	39.1304	39.1304	PolyA_SPL	TDR13	DNA	chr14	45579700	45580350	+	15.4
ID=chr14:-:gene:45858012:45859129;children=Zv9_00034198;	Zv9_00034198	lincRNA	chr14	45858012	45859129	-	1118	386	LAST	2	chr14	45858012	45858340	329	87	26.4438	22.5389	22.5389	exonized	SINE2-1_DR	SINE/tRNA	chr14	45858023	45858109	-	19.1
ID=chr14:-:gene:47731758:47734880;children=Zv9_00034219,Zv9_00034218,Zv9_00034220;	Zv9_00034218	lincRNA	chr14	47731758	47733762	-	2005	443	LAST	2	chr14	47731758	47732117	360	191	53.0556	43.1151	43.1151	exonized	SINE2-1_DR	SINE/tRNA	chr14	47731808	47731998	-	19.1
ID=chr14:-:gene:47731758:47734880;children=Zv9_00034219,Zv9_00034218,Zv9_00034220;	Zv9_00034219	lincRNA	chr14	47731769	47734613	-	2845	2062	LAST	2	chr14	47731769	47732896	1128	201	17.8191	9.74782	19.0107	exonized	SINE2-1_DR	SINE/tRNA	chr14	47732577	47732777	-	19.1
ID=chr14:-:gene:47731758:47734880;children=Zv9_00034219,Zv9_00034218,Zv9_00034220;	Zv9_00034219	lincRNA	chr14	47731769	47734613	-	2845	2062	LAST	2	chr14	47731769	47732896	1128	191	16.9326	9.26285	19.0107	exonized	SINE2-1_DR	SINE/tRNA	chr14	47731808	47731998	-	19.1
ID=chr14:-:gene:51921780:51938370;children=Zv9_00034315;	Zv9_00034315	lincRNA	chr14	51921780	51938370	-	16591	1527	FIRST	1	chr14	51936965	51938370	1406	635	45.1636	41.5848	66.4702	exonized	TDR13B	DNA	chr14	51937250	51937884	+	15.3
ID=chr14:-:gene:51921780:51938370;children=Zv9_00034315;	Zv9_00034315	lincRNA	chr14	51921780	51938370	-	16591	1527	FIRST	1	chr14	51936965	51938370	1406	331	23.542	21.6765	66.4702	TSS	HATN1_DR	DNA/hAT	chr14	51938040	51938399	-	12.1
ID=chr14:-:gene:51921780:51938370;children=Zv9_00034315;	Zv9_00034315	lincRNA	chr14	51921780	51938370	-	16591	1527	FIRST	1	chr14	51936965	51938370	1406	49	3.48506	3.20891	66.4702	exonized	EnSpm-N4_DR	DNA/En-Spm?	chr14	51937022	51937070	-	14.2
ID=chr14:-:gene:525620:526333;children=Zv9_00033427,Zv9_00033426,Zv9_00033428;	Zv9_00033426	lincRNA	chr14	525620	526333	-	714	413	LAST	2	chr14	525620	525922	303	54	17.8218	13.0751	13.0751	exonized	hAT-2n1_DR	DNA/hAT-Charlie	chr14	525738	525791	+	13.2
ID=chr14:-:gene:525620:526333;children=Zv9_00033427,Zv9_00033426,Zv9_00033428;	Zv9_00033427	lincRNA	chr14	525620	526333	-	714	607	LAST	2	chr14	525620	526116	497	54	10.8652	8.89621	8.89621	exonized	hAT-2n1_DR	DNA/hAT-Charlie	chr14	525738	525791	+	13.2
ID=chr14:-:gene:525620:526333;children=Zv9_00033427,Zv9_00033426,Zv9_00033428;	Zv9_00033428	lincRNA	chr14	525620	526333	-	714	524	LAST	2	chr14	525620	526056	437	54	12.357	10.3053	10.3053	exonized	hAT-2n1_DR	DNA/hAT-Charlie	chr14	525738	525791	+	13.2
ID=chr14:-:gene:6337515:6341920;children=Zv9_00033512;	Zv9_00033512	lincRNA	chr14	6337515	6341920	-	4406	2470	LAST	2	chr14	6337515	6339644	2130	25	1.17371	1.01215	34.6154	PolyA	Tc1-7_DR	DNA/TcMar-Tc1	chr14	6337431	6337539	-	8.9
ID=chr14:-:gene:6337515:6341920;children=Zv9_00033512;	Zv9_00033512	lincRNA	chr14	6337515	6341920	-	4406	2470	LAST	2	chr14	6337515	6339644	2130	194	9.10798	7.85425	34.6154	exonized	TDR3	DNA/hAT-Charlie	chr14	6338896	6339089	+	16.3
ID=chr14:-:gene:6337515:6341920;children=Zv9_00033512;	Zv9_00033512	lincRNA	chr14	6337515	6341920	-	4406	2470	LAST	2	chr14	6337515	6339644	2130	222	10.4225	8.98785	34.6154	exonized	TDR19	DNA/hAT	chr14	6338873	6339094	+	19.4
ID=chr14:-:gene:6337515:6341920;children=Zv9_00033512;	Zv9_00033512	lincRNA	chr14	6337515	6341920	-	4406	2470	LAST	2	chr14	6337515	6339644	2130	83	3.89671	3.36032	34.6154	exonized	TDR19	DNA/hAT	chr14	6338814	6338896	-	19.4
ID=chr14:-:gene:6337515:6341920;children=Zv9_00033512;	Zv9_00033512	lincRNA	chr14	6337515	6341920	-	4406	2470	LAST	2	chr14	6337515	6339644	2130	133	6.24413	5.38462	34.6154	exonized	HATN13_DR	DNA/hAT-Ac	chr14	6339229	6339361	+	12.2
ID=chr14:-:gene:6337515:6341920;children=Zv9_00033512;	Zv9_00033512	lincRNA	chr14	6337515	6341920	-	4406	2470	LAST	2	chr14	6337515	6339644	2130	139	6.52582	5.62753	34.6154	exonized	DNA-8-34_DR	DNA/hAT-Tip100	chr14	6339090	6339228	-	13.8
ID=chr14:-:gene:6337515:6341920;children=Zv9_00033512;	Zv9_00033512	lincRNA	chr14	6337515	6341920	-	4406	2470	LAST	2	chr14	6337515	6339644	2130	59	2.76995	2.38866	34.6154	exonized	DNA-8-34_DR	DNA/hAT-Tip100	chr14	6338838	6338896	-	13.8
ID=chr14:-:gene:7273800:7275095;children=UL_109;	UL_109	lincRNA	chr14	7273800	7275095	-	1296	1296	SINGLE	1	chr14	7273800	7275095	1296	171	13.1944	13.1944	26.2346	exonized	Helitron-1_DR	DNA/Helitron	chr14	7273946	7274116	-	17.5
ID=chr14:-:gene:7273800:7275095;children=UL_109;	UL_109	lincRNA	chr14	7273800	7275095	-	1296	1296	SINGLE	1	chr14	7273800	7275095	1296	169	13.0401	13.0401	26.2346	exonized	ANGEL	DNA/hAT	chr14	7273974	7274142	-	17.6
ID=chr14:-:gene:9744190:9753585;children=UL_110;	UL_110	lincRNA	chr14	9744190	9753585	-	9396	5762	LAST	3	chr14	9744190	9749069	4880	118	2.41803	2.0479	37.001	exonized	hAT-N53_DR	DNA/hAT?	chr14	9745147	9745264	-	15.5
ID=chr14:-:gene:9744190:9753585;children=UL_110;	UL_110	lincRNA	chr14	9744190	9753585	-	9396	5762	LAST	3	chr14	9744190	9749069	4880	199	4.07787	3.45366	37.001	exonized	hAT-N21_DR	DNA/hAT-Charlie	chr14	9745054	9745252	-	14.2
ID=chr14:-:gene:9744190:9753585;children=UL_110;	UL_110	lincRNA	chr14	9744190	9753585	-	9396	5762	LAST	3	chr14	9744190	9749069	4880	84	1.72131	1.45783	37.001	exonized	Helitron-N2_DR	DNA/Helitron	chr14	9745265	9745348	-	15
ID=chr14:-:gene:9744190:9753585;children=UL_110;	UL_110	lincRNA	chr14	9744190	9753585	-	9396	5762	LAST	3	chr14	9744190	9749069	4880	434	8.89344	7.53211	37.001	exonized	HATN10_DR	DNA/hAT	chr14	9746631	9747064	+	12.3
ID=chr14:-:gene:9744190:9753585;children=UL_110;	UL_110	lincRNA	chr14	9744190	9753585	-	9396	5762	LAST	3	chr14	9744190	9749069	4880	242	4.95902	4.19993	37.001	exonized	DNA25TWA1_DR	DNA	chr14	9748099	9748340	+	14.4
ID=chr14:-:gene:9744190:9753585;children=UL_110;	UL_110	lincRNA	chr14	9744190	9753585	-	9396	5762	LAST	3	chr14	9744190	9749069	4880	60	1.22951	1.04131	37.001	exonized	DNA-TTAA0-5_DR	DNA	chr14	9748589	9748648	-	12.4
ID=chr14:-:gene:9744190:9753585;children=UL_110;	UL_110	lincRNA	chr14	9744190	9753585	-	9396	5762	LAST	3	chr14	9744190	9749069	4880	77	1.57787	1.33634	37.001	exonized	DNA-TTAA0-5_DR	DNA	chr14	9747180	9747256	-	12.4
ID=chr14:-:gene:9744190:9753585;children=UL_110;	UL_110	lincRNA	chr14	9744190	9753585	-	9396	5762	LAST	3	chr14	9744190	9749069	4880	80	1.63934	1.38841	37.001	exonized	DNA-TTAA0-5_DR	DNA	chr14	9747083	9747162	-	12.4
ID=chr14:-:gene:9744190:9753585;children=UL_110;	UL_110	lincRNA	chr14	9744190	9753585	-	9396	5762	LAST	3	chr14	9744190	9749069	4880	130	2.66393	2.25616	37.001	exonized	DNA-TTAA0-5_DR	DNA	chr14	9745598	9745727	-	12.4
ID=chr14:-:gene:9744190:9753585;children=UL_110;	UL_110	lincRNA	chr14	9744190	9753585	-	9396	5762	LAST	3	chr14	9744190	9749069	4880	636	13.0328	11.0378	37.001	exonized	DNA-6-N1_DR	DNA	chr14	9745986	9746621	-	16.2
ID=chr14:-:gene:9744190:9753585;children=UL_110;	UL_110	lincRNA	chr14	9744190	9753585	-	9396	5762	LAST	3	chr14	9744190	9749069	4880	72	1.47541	1.24957	37.001	exonized	DNA-5-8_DR	DNA	chr14	9744556	9744627	-	17.2
ID=chr14:+:gene:1087008:1088035;children=UL_106;	UL_106	lincRNA	chr14	1087008	1088035	+	1028	391	MIDDLE	2	chr14	1087347	1087481	135	135	100	34.5269	39.8977	Both_SPL	DNA-8-28_DR	DNA/P?	chr14	1087131	1087689	-	16.2
ID=chr14:+:gene:1087008:1088035;children=UL_106;	UL_106	lincRNA	chr14	1087008	1088035	+	1028	391	LAST	3	chr14	1087877	1088035	159	21	13.2075	5.37084	39.8977	SPL	HATN12_DR	DNA/hAT-Ac	chr14	1087857	1087897	+	16.5
ID=chr14:+:gene:17767172:17775655;children=Zv9_00032709;	Zv9_00032709	lincRNA	chr14	17767172	17775655	+	8484	167	FIRST	1	chr14	17767172	17767302	131	45	34.3511	26.9461	26.9461	TSS	Gypsy-115-I_DR-int	LTR/Gypsy	chr14	17766728	17767216	-	15.2
ID=chr14:+:gene:21174:22477;children=Zv9_00032372,Zv9_00032373,Zv9_00032370,Zv9_00032371;	Zv9_00032370	lincRNA	chr14	21174	22476	+	1303	542	FIRST	1	chr14	21174	21459	286	111	38.8112	20.4797	39.1144	exonized	Polinton-1_DR	DNA/Maverick	chr14	21257	21367	+	20.5
ID=chr14:+:gene:21174:22477;children=Zv9_00032372,Zv9_00032373,Zv9_00032370,Zv9_00032371;	Zv9_00032370	lincRNA	chr14	21174	22476	+	1303	542	FIRST	1	chr14	21174	21459	286	49	17.1329	9.04059	39.1144	exonized	ERV1-N3-I_DR-int	LTR	chr14	21293	21341	+	20.3
ID=chr14:+:gene:21174:22477;children=Zv9_00032372,Zv9_00032373,Zv9_00032370,Zv9_00032371;	Zv9_00032370	lincRNA	chr14	21174	22476	+	1303	542	FIRST	1	chr14	21174	21459	286	30	10.4895	5.53506	39.1144	exonized	DNA-8-5_DR	DNA/hAT	chr14	21368	21397	-	15.6
ID=chr14:+:gene:21174:22477;children=Zv9_00032372,Zv9_00032373,Zv9_00032370,Zv9_00032371;	Zv9_00032370	lincRNA	chr14	21174	22476	+	1303	542	FIRST	1	chr14	21174	21459	286	22	7.69231	4.05904	39.1144	exonized	DNA-8-5_DR	DNA/hAT	chr14	21235	21256	-	15.6
ID=chr14:+:gene:21174:22477;children=Zv9_00032372,Zv9_00032373,Zv9_00032370,Zv9_00032371;	Zv9_00032371	lincRNA	chr14	21174	22476	+	1303	545	FIRST	1	chr14	21174	21459	286	111	38.8112	20.367	38.8991	exonized	Polinton-1_DR	DNA/Maverick	chr14	21257	21367	+	20.5
ID=chr14:+:gene:21174:22477;children=Zv9_00032372,Zv9_00032373,Zv9_00032370,Zv9_00032371;	Zv9_00032371	lincRNA	chr14	21174	22476	+	1303	545	FIRST	1	chr14	21174	21459	286	49	17.1329	8.99083	38.8991	exonized	ERV1-N3-I_DR-int	LTR	chr14	21293	21341	+	20.3
ID=chr14:+:gene:21174:22477;children=Zv9_00032372,Zv9_00032373,Zv9_00032370,Zv9_00032371;	Zv9_00032371	lincRNA	chr14	21174	22476	+	1303	545	FIRST	1	chr14	21174	21459	286	30	10.4895	5.50459	38.8991	exonized	DNA-8-5_DR	DNA/hAT	chr14	21368	21397	-	15.6
ID=chr14:+:gene:21174:22477;children=Zv9_00032372,Zv9_00032373,Zv9_00032370,Zv9_00032371;	Zv9_00032371	lincRNA	chr14	21174	22476	+	1303	545	FIRST	1	chr14	21174	21459	286	22	7.69231	4.0367	38.8991	exonized	DNA-8-5_DR	DNA/hAT	chr14	21235	21256	-	15.6
ID=chr14:+:gene:21174:22477;children=Zv9_00032372,Zv9_00032373,Zv9_00032370,Zv9_00032371;	Zv9_00032372	lincRNA	chr14	21181	22477	+	1297	539	FIRST	1	chr14	21181	21459	279	111	39.7849	20.5937	39.3321	exonized	Polinton-1_DR	DNA/Maverick	chr14	21257	21367	+	20.5
ID=chr14:+:gene:21174:22477;children=Zv9_00032372,Zv9_00032373,Zv9_00032370,Zv9_00032371;	Zv9_00032372	lincRNA	chr14	21181	22477	+	1297	539	FIRST	1	chr14	21181	21459	279	49	17.5627	9.09091	39.3321	exonized	ERV1-N3-I_DR-int	LTR	chr14	21293	21341	+	20.3
ID=chr14:+:gene:21174:22477;children=Zv9_00032372,Zv9_00032373,Zv9_00032370,Zv9_00032371;	Zv9_00032372	lincRNA	chr14	21181	22477	+	1297	539	FIRST	1	chr14	21181	21459	279	30	10.7527	5.56586	39.3321	exonized	DNA-8-5_DR	DNA/hAT	chr14	21368	21397	-	15.6
ID=chr14:+:gene:21174:22477;children=Zv9_00032372,Zv9_00032373,Zv9_00032370,Zv9_00032371;	Zv9_00032372	lincRNA	chr14	21181	22477	+	1297	539	FIRST	1	chr14	21181	21459	279	22	7.8853	4.08163	39.3321	exonized	DNA-8-5_DR	DNA/hAT	chr14	21235	21256	-	15.6
ID=chr14:+:gene:21174:22477;children=Zv9_00032372,Zv9_00032373,Zv9_00032370,Zv9_00032371;	Zv9_00032373	lincRNA	chr14	21181	22477	+	1297	542	FIRST	1	chr14	21181	21459	279	111	39.7849	20.4797	39.1144	exonized	Polinton-1_DR	DNA/Maverick	chr14	21257	21367	+	20.5
ID=chr14:+:gene:21174:22477;children=Zv9_00032372,Zv9_00032373,Zv9_00032370,Zv9_00032371;	Zv9_00032373	lincRNA	chr14	21181	22477	+	1297	542	FIRST	1	chr14	21181	21459	279	49	17.5627	9.04059	39.1144	exonized	ERV1-N3-I_DR-int	LTR	chr14	21293	21341	+	20.3
ID=chr14:+:gene:21174:22477;children=Zv9_00032372,Zv9_00032373,Zv9_00032370,Zv9_00032371;	Zv9_00032373	lincRNA	chr14	21181	22477	+	1297	542	FIRST	1	chr14	21181	21459	279	30	10.7527	5.53506	39.1144	exonized	DNA-8-5_DR	DNA/hAT	chr14	21368	21397	-	15.6
ID=chr14:+:gene:21174:22477;children=Zv9_00032372,Zv9_00032373,Zv9_00032370,Zv9_00032371;	Zv9_00032373	lincRNA	chr14	21181	22477	+	1297	542	FIRST	1	chr14	21181	21459	279	22	7.8853	4.05904	39.1144	exonized	DNA-8-5_DR	DNA/hAT	chr14	21235	21256	-	15.6
ID=chr14:+:gene:23368095:23370886;children=UL_114;	UL_114	lincRNA	chr14	23368095	23370886	+	2792	2792	SINGLE	1	chr14	23368095	23370886	2792	47	1.68338	1.68338	38.0014	exonized	TE-X-4_DR	Unknown	chr14	23370150	23370196	-	17.1
ID=chr14:+:gene:23368095:23370886;children=UL_114;	UL_114	lincRNA	chr14	23368095	23370886	+	2792	2792	SINGLE	1	chr14	23368095	23370886	2792	130	4.65616	4.65616	38.0014	exonized	TDR16	DNA	chr14	23369114	23369243	+	13.9
ID=chr14:+:gene:23368095:23370886;children=UL_114;	UL_114	lincRNA	chr14	23368095	23370886	+	2792	2792	SINGLE	1	chr14	23368095	23370886	2792	452	16.1891	16.1891	38.0014	exonized	Kolobok-N2A_DR	DNA/Kolobok	chr14	23369399	23369850	+	13.9
ID=chr14:+:gene:23368095:23370886;children=UL_114;	UL_114	lincRNA	chr14	23368095	23370886	+	2792	2792	SINGLE	1	chr14	23368095	23370886	2792	152	5.44413	5.44413	38.0014	exonized	HE1_DR1	SINE/V	chr14	23369863	23370014	+	13.2
ID=chr14:+:gene:23368095:23370886;children=UL_114;	UL_114	lincRNA	chr14	23368095	23370886	+	2792	2792	SINGLE	1	chr14	23368095	23370886	2792	181	6.48281	6.48281	38.0014	exonized	EnSpm-N7_DR	DNA/En-Spm	chr14	23369245	23369425	+	13.1
ID=chr14:+:gene:23368095:23370886;children=UL_114;	UL_114	lincRNA	chr14	23368095	23370886	+	2792	2792	SINGLE	1	chr14	23368095	23370886	2792	99	3.54585	3.54585	38.0014	exonized	ANGEL	DNA/hAT	chr14	23370614	23370712	+	17.6
ID=chr14:+:gene:25876766:25878245;children=UL_116,UL_117;	UL_116	lincRNA	chr14	25876766	25878188	+	1423	1423	SINGLE	1	chr14	25876766	25878188	1423	73	5.13001	5.13001	24.8067	exonized	TDR9	DNA	chr14	25878017	25878089	-	14.5
ID=chr14:+:gene:25876766:25878245;children=UL_116,UL_117;	UL_116	lincRNA	chr14	25876766	25878188	+	1423	1423	SINGLE	1	chr14	25876766	25878188	1423	280	19.6767	19.6767	24.8067	exonized	HE1_DR1	SINE/V	chr14	25877737	25878016	+	13.2
ID=chr14:+:gene:25876766:25878245;children=UL_116,UL_117;	UL_117	lincRNA	chr14	25876766	25878245	+	1480	1480	SINGLE	1	chr14	25876766	25878245	1480	73	4.93243	4.93243	23.8514	exonized	TDR9	DNA	chr14	25878017	25878089	-	14.5
ID=chr14:+:gene:25876766:25878245;children=UL_116,UL_117;	UL_117	lincRNA	chr14	25876766	25878245	+	1480	1480	SINGLE	1	chr14	25876766	25878245	1480	280	18.9189	18.9189	23.8514	exonized	HE1_DR1	SINE/V	chr14	25877737	25878016	+	13.2
ID=chr14:+:gene:32886246:32890223;children=UL_119,UL_120;	UL_119	lincRNA	chr14	32886246	32890094	+	3849	3849	SINGLE	1	chr14	32886246	32890094	3849	74	1.92258	1.92258	6.70304	exonized	hAT-2n1_DR	DNA/hAT-Charlie	chr14	32887817	32887890	-	13.2
ID=chr14:+:gene:32886246:32890223;children=UL_119,UL_120;	UL_119	lincRNA	chr14	32886246	32890094	+	3849	3849	SINGLE	1	chr14	32886246	32890094	3849	101	2.62406	2.62406	6.70304	exonized	Helitron-N2_DR	DNA/Helitron	chr14	32887813	32887913	-	15
ID=chr14:+:gene:32886246:32890223;children=UL_119,UL_120;	UL_119	lincRNA	chr14	32886246	32890094	+	3849	3849	SINGLE	1	chr14	32886246	32890094	3849	69	1.79267	1.79267	6.70304	exonized	ENSPM-6_DR	DNA/En-Spm	chr14	32887748	32887816	-	17.5
ID=chr14:+:gene:32886246:32890223;children=UL_119,UL_120;	UL_119	lincRNA	chr14	32886246	32890094	+	3849	3849	SINGLE	1	chr14	32886246	32890094	3849	14	0.363731	0.363731	6.70304	exonized	ENSPM-6_DR	DNA/En-Spm	chr14	32887623	32887636	-	17.5
ID=chr14:+:gene:32886246:32890223;children=UL_119,UL_120;	UL_120	lincRNA	chr14	32886246	32890223	+	3978	3978	SINGLE	1	chr14	32886246	32890223	3978	74	1.86023	1.86023	6.48567	exonized	hAT-2n1_DR	DNA/hAT-Charlie	chr14	32887817	32887890	-	13.2
ID=chr14:+:gene:32886246:32890223;children=UL_119,UL_120;	UL_120	lincRNA	chr14	32886246	32890223	+	3978	3978	SINGLE	1	chr14	32886246	32890223	3978	101	2.53896	2.53896	6.48567	exonized	Helitron-N2_DR	DNA/Helitron	chr14	32887813	32887913	-	15
ID=chr14:+:gene:32886246:32890223;children=UL_119,UL_120;	UL_120	lincRNA	chr14	32886246	32890223	+	3978	3978	SINGLE	1	chr14	32886246	32890223	3978	69	1.73454	1.73454	6.48567	exonized	ENSPM-6_DR	DNA/En-Spm	chr14	32887748	32887816	-	17.5
ID=chr14:+:gene:32886246:32890223;children=UL_119,UL_120;	UL_120	lincRNA	chr14	32886246	32890223	+	3978	3978	SINGLE	1	chr14	32886246	32890223	3978	14	0.351936	0.351936	6.48567	exonized	ENSPM-6_DR	DNA/En-Spm	chr14	32887623	32887636	-	17.5
ID=chr14:+:gene:32943997:32982384;children=Zv9_00033021,Zv9_00033020;	Zv9_00033020	lincRNA	chr14	32943997	32958672	+	14676	771	MIDDLE	2	chr14	32945531	32945563	33	33	100	4.28016	4.28016	Both_SPL	ANGEL	DNA/hAT	chr14	32945502	32945600	+	17.6
ID=chr14:+:gene:32943997:32982384;children=Zv9_00033021,Zv9_00033020;	Zv9_00033021	lincRNA	chr14	32944442	32982384	+	37943	1786	MIDDLE	2	chr14	32945531	32945563	33	33	100	1.8477	1.8477	Both_SPL	ANGEL	DNA/hAT	chr14	32945502	32945600	+	17.6
ID=chr14:+:gene:35242930:35251172;children=Zv9_00033078;	Zv9_00033078	lincRNA	chr14	35242930	35251172	+	8243	1114	LAST	2	chr14	35250483	35251172	690	19	2.75362	1.70557	1.70557	PolyA	LOOPERN4_DR	DNA/PiggyBac	chr14	35251154	35251534	-	15.4
ID=chr14:+:gene:36422576:36457432;children=Zv9_00033103;	Zv9_00033103	lincRNA	chr14	36422576	36457432	+	34857	1201	LAST	3	chr14	36456398	36457432	1035	79	7.63285	6.57785	6.57785	PolyA	TDR18	DNA/hAT-Charlie	chr14	36457354	36457884	-	10.6
ID=chr14:+:gene:37103246:37104722;children=UL_123;	UL_126	lincRNA	chr14	40176976	40183099	+	6124	997	LAST	4	chr14	40182328	40183099	772	62	8.03109	6.21866	6.21866	exonized	Helitron-1_DR	DNA/Helitron	chr14	40182769	40182830	+	17.5
ID=chr14:+:gene:3747587:3753150;children=UL_108;	UL_108	lincRNA	chr14	3747587	3753150	+	5564	5564	SINGLE	1	chr14	3747587	3753150	5564	190	3.41481	3.41481	34.7771	exonized	SINE2-1_DR	SINE/tRNA	chr14	3752410	3752599	+	19.1
ID=chr14:+:gene:3747587:3753150;children=UL_108;	UL_108	lincRNA	chr14	3747587	3753150	+	5564	5564	SINGLE	1	chr14	3747587	3753150	5564	200	3.59454	3.59454	34.7771	exonized	SINE2-1_DR	SINE/tRNA	chr14	3752193	3752392	+	19.1
ID=chr14:+:gene:3747587:3753150;children=UL_108;	UL_108	lincRNA	chr14	3747587	3753150	+	5564	5564	SINGLE	1	chr14	3747587	3753150	5564	200	3.59454	3.59454	34.7771	exonized	SINE2-1_DR	SINE/tRNA	chr14	3751977	3752176	+	19.1
ID=chr14:+:gene:3747587:3753150;children=UL_108;	UL_108	lincRNA	chr14	3747587	3753150	+	5564	5564	SINGLE	1	chr14	3747587	3753150	5564	552	9.92092	9.92092	34.7771	exonized	DNA8-4A_DR	DNA/hAT-Charlie	chr14	3749681	3750232	-	11.6
ID=chr14:+:gene:3747587:3753150;children=UL_108;	UL_108	lincRNA	chr14	3747587	3753150	+	5564	5564	SINGLE	1	chr14	3747587	3753150	5564	594	10.6758	10.6758	34.7771	exonized	DIRS-4N2_DR	LTR/Ngaro	chr14	3751172	3751765	+	15.9
ID=chr14:+:gene:3747587:3753150;children=UL_108;	UL_108	lincRNA	chr14	3747587	3753150	+	5564	5564	SINGLE	1	chr14	3747587	3753150	5564	134	2.40834	2.40834	34.7771	exonized	ANGEL	DNA/hAT	chr14	3752603	3752736	-	17.6
ID=chr14:+:gene:3747587:3753150;children=UL_108;	UL_108	lincRNA	chr14	3747587	3753150	+	5564	5564	SINGLE	1	chr14	3747587	3753150	5564	65	1.16822	1.16822	34.7771	exonized	ANGEL	DNA/hAT	chr14	3751894	3751958	-	17.6
ID=chr14:+:gene:40176952:40288333;children=UL_126,Zv9_00033168,UL_128,UL_125,UL_124,UL_127;	UL_128	lincRNA	chr14	40282728	40288333	+	5606	1009	LAST	4	chr14	40287561	40288333	773	60	7.76197	5.94648	5.94648	exonized	Helitron-1_DR	DNA/Helitron	chr14	40288005	40288064	+	17.5
ID=chr14:+:gene:40443309:40549878;children=Zv9_00033173;	Zv9_00033173	lincRNA	chr14	40443309	40549878	+	106570	2189	FIRST	1	chr14	40443309	40443592	284	268	94.3662	12.243	27.1357	exonized	CR1-5_DR	LINE/L2	chr14	40443323	40443590	-	12.2
ID=chr14:+:gene:40443309:40549878;children=Zv9_00033173;	Zv9_00033173	lincRNA	chr14	40443309	40549878	+	106570	2189	LAST	4	chr14	40548283	40549878	1596	52	3.25815	2.37551	27.1357	exonized	Kolobok-N2_DR	DNA/Kolobok	chr14	40549532	40549583	+	14.7
ID=chr14:+:gene:40443309:40549878;children=Zv9_00033173;	Zv9_00033173	lincRNA	chr14	40443309	40549878	+	106570	2189	LAST	4	chr14	40548283	40549878	1596	113	7.0802	5.16217	27.1357	exonized	CR1-5_DR	LINE/L2	chr14	40549267	40549379	+	12.2
ID=chr14:+:gene:40443309:40549878;children=Zv9_00033173;	Zv9_00033173	lincRNA	chr14	40443309	40549878	+	106570	2189	LAST	4	chr14	40548283	40549878	1596	161	10.0877	7.35496	27.1357	exonized	CR1-5_DR	LINE/L2	chr14	40549083	40549243	+	12.2
ID=chr14:+:gene:4630456:4633022;children=Zv9_00032508;	Zv9_00032508	lincRNA	chr14	4630456	4633022	+	2567	459	FIRST	1	chr14	4630456	4630568	113	113	100	24.6187	24.6187	TSS_SPL	TDR13	DNA	chr14	4630337	4630769	+	15.4
ID=chr14:+:gene:48580074:48608921;children=UL_131;	UL_131	lincRNA	chr14	48580074	48608921	+	28848	6586	LAST	7	chr14	48604232	48608921	4690	123	2.6226	1.8676	44.0935	exonized	TDR13B	DNA	chr14	48605726	48605848	-	15.3
ID=chr14:+:gene:48580074:48608921;children=UL_131;	UL_131	lincRNA	chr14	48580074	48608921	+	28848	6586	LAST	7	chr14	48604232	48608921	4690	138	2.94243	2.09535	44.0935	exonized	Mariner-N5_DR	DNA/TcMar	chr14	48607407	48607544	+	15.1
ID=chr14:+:gene:48580074:48608921;children=UL_131;	UL_131	lincRNA	chr14	48580074	48608921	+	28848	6586	LAST	7	chr14	48604232	48608921	4690	206	4.39232	3.12785	44.0935	exonized	HarbingerN6_DR	DNA/Harbinger	chr14	48605897	48606102	-	14.9
ID=chr14:+:gene:48580074:48608921;children=UL_131;	UL_131	lincRNA	chr14	48580074	48608921	+	28848	6586	LAST	7	chr14	48604232	48608921	4690	138	2.94243	2.09535	44.0935	exonized	HarbingerN5_DR	DNA/Harbinger	chr14	48605533	48605670	-	11.6
ID=chr14:+:gene:48580074:48608921;children=UL_131;	UL_131	lincRNA	chr14	48580074	48608921	+	28848	6586	LAST	7	chr14	48604232	48608921	4690	375	7.99574	5.6939	44.0935	exonized	HE1_DR1	SINE/V	chr14	48604973	48605347	+	13.2
ID=chr14:+:gene:48580074:48608921;children=UL_131;	UL_131	lincRNA	chr14	48580074	48608921	+	28848	6586	LAST	7	chr14	48604232	48608921	4690	271	5.77825	4.11479	44.0935	exonized	HATN8_DR	DNA	chr14	48606484	48606754	+	12.7
ID=chr14:+:gene:48580074:48608921;children=UL_131;	UL_131	lincRNA	chr14	48580074	48608921	+	28848	6586	LAST	7	chr14	48604232	48608921	4690	111	2.36674	1.68539	44.0935	exonized	ENSPM-6_DR	DNA/En-Spm	chr14	48607232	48607342	-	17.5
ID=chr14:+:gene:48580074:48608921;children=UL_131;	UL_131	lincRNA	chr14	48580074	48608921	+	28848	6586	LAST	7	chr14	48604232	48608921	4690	198	4.22175	3.00638	44.0935	exonized	DNA21TA1_DR	DNA/TcMar-Tc1	chr14	48605343	48605540	+	11.2
ID=chr14:+:gene:48580074:48608921;children=UL_131;	UL_131	lincRNA	chr14	48580074	48608921	+	28848	6586	LAST	7	chr14	48604232	48608921	4690	918	19.5736	13.9387	44.0935	exonized	DNA-3-1_DR	DNA	chr14	48607557	48608474	-	15.5
ID=chr14:+:gene:48580074:48608921;children=UL_131;	UL_131	lincRNA	chr14	48580074	48608921	+	28848	6586	LAST	7	chr14	48604232	48608921	4690	61	1.30064	0.926207	44.0935	exonized	DNA-3-1_DR	DNA	chr14	48607380	48607440	-	15.5
ID=chr14:+:gene:48580074:48608921;children=UL_131;	UL_131	lincRNA	chr14	48580074	48608921	+	28848	6586	LAST	7	chr14	48604232	48608921	4690	94	2.00426	1.42727	44.0935	exonized	DIRS-7_DR	LTR/Ngaro	chr14	48606777	48606870	+	14.2
ID=chr14:+:gene:48580074:48608921;children=UL_131;	UL_131	lincRNA	chr14	48580074	48608921	+	28848	6586	LAST	7	chr14	48604232	48608921	4690	161	3.43284	2.44458	44.0935	exonized	ANGEL	DNA/hAT	chr14	48606787	48606947	-	17.6
ID=chr14:+:gene:48580074:48608921;children=UL_131;	UL_131	lincRNA	chr14	48580074	48608921	+	28848	6586	LAST	7	chr14	48604232	48608921	4690	110	2.34542	1.67021	44.0935	exonized	ANGEL	DNA/hAT	chr14	48606372	48606481	-	17.6
ID=chr15:-:gene:25053623:25095450;children=Zv9_00035902,Zv9_00035903,Zv9_00035900,Zv9_00035901;	Zv9_00035900	lincRNA	chr15	25053623	25095438	-	41816	1226	LAST	6	chr15	25053623	25054330	708	180	25.4237	14.6819	14.6819	PolyA	DNA-TTAA0-5_DR	DNA	chr15	25053572	25053802	+	12.4
ID=chr15:-:gene:25053623:25095450;children=Zv9_00035902,Zv9_00035903,Zv9_00035900,Zv9_00035901;	Zv9_00035901	lincRNA	chr15	25053781	25095441	-	41661	1100	LAST	6	chr15	25053781	25054310	530	22	4.15094	2	2	PolyA	DNA-TTAA0-5_DR	DNA	chr15	25053572	25053802	+	12.4
ID=chr15:-:gene:25053623:25095450;children=Zv9_00035902,Zv9_00035903,Zv9_00035900,Zv9_00035901;	Zv9_00035902	lincRNA	chr15	25066818	25095450	-	28633	806	MIDDLE	3	chr15	25067623	25067707	85	85	100	10.5459	10.5459	Both_SPL	HE1_DR1	SINE/V	chr15	25067593	25067941	-	13.2
ID=chr15:-:gene:2610652:2615905;children=UL_139;	UL_139	lincRNA	chr15	2610652	2615905	-	5254	5254	SINGLE	1	chr15	2610652	2615905	5254	491	9.34526	9.34526	40.3692	exonized	hAT-N38_DR	DNA/hAT-Blackjack	chr15	2612747	2613237	+	12.5
ID=chr15:-:gene:2610652:2615905;children=UL_139;	UL_139	lincRNA	chr15	2610652	2615905	-	5254	5254	SINGLE	1	chr15	2610652	2615905	5254	320	6.0906	6.0906	40.3692	exonized	hAT-N38_DR	DNA/hAT-Blackjack	chr15	2612362	2612681	+	12.5
ID=chr15:-:gene:2610652:2615905;children=UL_139;	UL_139	lincRNA	chr15	2610652	2615905	-	5254	5254	SINGLE	1	chr15	2610652	2615905	5254	136	2.5885	2.5885	40.3692	exonized	hAT-N38_DR	DNA/hAT-Blackjack	chr15	2611844	2611979	+	12.5
ID=chr15:-:gene:2610652:2615905;children=UL_139;	UL_139	lincRNA	chr15	2610652	2615905	-	5254	5254	SINGLE	1	chr15	2610652	2615905	5254	78	1.48458	1.48458	40.3692	exonized	hAT-N21_DR	DNA/hAT-Charlie	chr15	2615780	2615857	+	14.2
ID=chr15:-:gene:2610652:2615905;children=UL_139;	UL_139	lincRNA	chr15	2610652	2615905	-	5254	5254	SINGLE	1	chr15	2610652	2615905	5254	97	1.84621	1.84621	40.3692	exonized	hAT-N21_DR	DNA/hAT-Charlie	chr15	2615399	2615495	+	14.2
ID=chr15:-:gene:2610652:2615905;children=UL_139;	UL_139	lincRNA	chr15	2610652	2615905	-	5254	5254	SINGLE	1	chr15	2610652	2615905	5254	83	1.57975	1.57975	40.3692	exonized	hAT-N21_DR	DNA/hAT-Charlie	chr15	2615041	2615123	+	14.2
ID=chr15:-:gene:2610652:2615905;children=UL_139;	UL_139	lincRNA	chr15	2610652	2615905	-	5254	5254	SINGLE	1	chr15	2610652	2615905	5254	97	1.84621	1.84621	40.3692	exonized	hAT-N21_DR	DNA/hAT-Charlie	chr15	2614668	2614764	+	14.2
ID=chr15:-:gene:2610652:2615905;children=UL_139;	UL_139	lincRNA	chr15	2610652	2615905	-	5254	5254	SINGLE	1	chr15	2610652	2615905	5254	76	1.44652	1.44652	40.3692	exonized	hAT-N21_DR	DNA/hAT-Charlie	chr15	2614317	2614392	+	14.2
ID=chr15:-:gene:2610652:2615905;children=UL_139;	UL_139	lincRNA	chr15	2610652	2615905	-	5254	5254	SINGLE	1	chr15	2610652	2615905	5254	89	1.69395	1.69395	40.3692	exonized	hAT-N21_DR	DNA/hAT-Charlie	chr15	2613941	2614029	+	14.2
ID=chr15:-:gene:2610652:2615905;children=UL_139;	UL_139	lincRNA	chr15	2610652	2615905	-	5254	5254	SINGLE	1	chr15	2610652	2615905	5254	71	1.35135	1.35135	40.3692	exonized	hAT-N21_DR	DNA/hAT-Charlie	chr15	2611483	2611553	-	14.2
ID=chr15:-:gene:2610652:2615905;children=UL_139;	UL_139	lincRNA	chr15	2610652	2615905	-	5254	5254	SINGLE	1	chr15	2610652	2615905	5254	201	3.82566	3.82566	40.3692	exonized	Helitron-N3_DR	DNA/Helitron	chr15	2613269	2613469	+	14.5
ID=chr15:-:gene:2610652:2615905;children=UL_139;	UL_139	lincRNA	chr15	2610652	2615905	-	5254	5254	SINGLE	1	chr15	2610652	2615905	5254	382	7.27065	7.27065	40.3692	exonized	DNA-AT-1_DR	DNA	chr15	2611980	2612361	-	13.4
ID=chr15:-:gene:27943427:27945391;children=UL_152;	UL_152	lincRNA	chr15	27943427	27945391	-	1965	1762	LAST	2	chr15	27943427	27945042	1616	504	31.1881	28.6039	30.7605	exonized	TDR18	DNA/hAT-Charlie	chr15	27943547	27944050	+	10.6
ID=chr15:-:gene:27943427:27945391;children=UL_152;	UL_152	lincRNA	chr15	27943427	27945391	-	1965	1762	LAST	2	chr15	27943427	27945042	1616	38	2.35149	2.15664	30.7605	exonized	Helitron-N3_DR	DNA/Helitron	chr15	27943509	27943546	-	14.5
ID=chr15:-:gene:31713432:31772034;children=Zv9_00036038,Zv9_00036037;	Zv9_00036037	lincRNA	chr15	31713432	31772034	-	58603	1291	LAST	3	chr15	31713432	31714284	853	424	49.7069	32.8428	32.8428	PolyA	Kolobok-N5_DR	DNA/Kolobok?	chr15	31713392	31713855	+	14.6
ID=chr15:-:gene:40246948:40270745;children=UL_157,UL_158;	UL_157	lincRNA	chr15	40246948	40270021	-	23074	2592	LAST	6	chr15	40246948	40248822	1875	301	16.0533	11.6127	36.5741	exonized	DNA8-3_DR	DNA	chr15	40247407	40247707	-	13.4
ID=chr15:-:gene:40246948:40270745;children=UL_157,UL_158;	UL_157	lincRNA	chr15	40246948	40270021	-	23074	2592	LAST	6	chr15	40246948	40248822	1875	258	13.76	9.9537	36.5741	exonized	CR1-5_DR	LINE/L2	chr15	40247709	40247966	+	12.2
ID=chr15:-:gene:40246948:40270745;children=UL_157,UL_158;	UL_157	lincRNA	chr15	40246948	40270021	-	23074	2592	LAST	6	chr15	40246948	40248822	1875	389	20.7467	15.0077	36.5741	exonized	CR1-5_DR	LINE/L2	chr15	40247013	40247401	+	12.2
ID=chr15:-:gene:40246948:40270745;children=UL_157,UL_158;	UL_158	lincRNA	chr15	40246948	40270745	-	23798	3098	LAST	7	chr15	40246948	40248822	1875	301	16.0533	9.71595	30.6004	exonized	DNA8-3_DR	DNA	chr15	40247407	40247707	-	13.4
ID=chr15:-:gene:40246948:40270745;children=UL_157,UL_158;	UL_158	lincRNA	chr15	40246948	40270745	-	23798	3098	LAST	7	chr15	40246948	40248822	1875	258	13.76	8.32795	30.6004	exonized	CR1-5_DR	LINE/L2	chr15	40247709	40247966	+	12.2
ID=chr15:-:gene:40246948:40270745;children=UL_157,UL_158;	UL_158	lincRNA	chr15	40246948	40270745	-	23798	3098	LAST	7	chr15	40246948	40248822	1875	389	20.7467	12.5565	30.6004	exonized	CR1-5_DR	LINE/L2	chr15	40247013	40247401	+	12.2
ID=chr15:-:gene:43735400:43740585;children=UL_160;	UL_160	lincRNA	chr15	43735400	43740585	-	5186	5186	SINGLE	1	chr15	43735400	43740585	5186	230	4.43502	4.43502	63.0158	exonized	hAT-N47_DR	DNA/hAT	chr15	43736644	43736873	-	9.7
ID=chr15:-:gene:43735400:43740585;children=UL_160;	UL_160	lincRNA	chr15	43735400	43740585	-	5186	5186	SINGLE	1	chr15	43735400	43740585	5186	145	2.79599	2.79599	63.0158	exonized	hAT-N47_DR	DNA/hAT	chr15	43736468	43736612	-	9.7
ID=chr15:-:gene:43735400:43740585;children=UL_160;	UL_160	lincRNA	chr15	43735400	43740585	-	5186	5186	SINGLE	1	chr15	43735400	43740585	5186	779	15.0212	15.0212	63.0158	exonized	REX1-1_DR	LINE/Rex-Babar	chr15	43737643	43738421	-	11.1
ID=chr15:-:gene:43735400:43740585;children=UL_160;	UL_160	lincRNA	chr15	43735400	43740585	-	5186	5186	SINGLE	1	chr15	43735400	43740585	5186	175	3.37447	3.37447	63.0158	exonized	Helitron-1_DR	DNA/Helitron	chr15	43738486	43738660	-	17.5
ID=chr15:-:gene:43735400:43740585;children=UL_160;	UL_160	lincRNA	chr15	43735400	43740585	-	5186	5186	SINGLE	1	chr15	43735400	43740585	5186	585	11.2804	11.2804	63.0158	exonized	Helitron-1_DR	DNA/Helitron	chr15	43737061	43737645	-	17.5
ID=chr15:-:gene:43735400:43740585;children=UL_160;	UL_160	lincRNA	chr15	43735400	43740585	-	5186	5186	SINGLE	1	chr15	43735400	43740585	5186	72	1.38835	1.38835	63.0158	exonized	HATN17_DR	DNA/hAT	chr15	43739160	43739231	+	14.2
ID=chr15:-:gene:43735400:43740585;children=UL_160;	UL_160	lincRNA	chr15	43735400	43740585	-	5186	5186	SINGLE	1	chr15	43735400	43740585	5186	35	0.674894	0.674894	63.0158	exonized	DNA-TA-4_DR	DNA/TcMar	chr15	43739159	43739193	+	15.9
ID=chr15:-:gene:43735400:43740585;children=UL_160;	UL_160	lincRNA	chr15	43735400	43740585	-	5186	5186	SINGLE	1	chr15	43735400	43740585	5186	133	2.5646	2.5646	63.0158	exonized	DNA-8-24_DR	DNA/hAT?	chr15	43738736	43738868	+	17.2
ID=chr15:-:gene:43735400:43740585;children=UL_160;	UL_160	lincRNA	chr15	43735400	43740585	-	5186	5186	SINGLE	1	chr15	43735400	43740585	5186	64	1.23409	1.23409	63.0158	exonized	DNA-8-14_DR	DNA/hAT-Charlie	chr15	43735767	43735830	-	11.4
ID=chr15:-:gene:43735400:43740585;children=UL_160;	UL_160	lincRNA	chr15	43735400	43740585	-	5186	5186	SINGLE	1	chr15	43735400	43740585	5186	403	7.77092	7.77092	63.0158	exonized	DNA-5-2_DR	DNA/hAT-Tip100	chr15	43738756	43739158	-	12.6
ID=chr15:-:gene:43735400:43740585;children=UL_160;	UL_160	lincRNA	chr15	43735400	43740585	-	5186	5186	SINGLE	1	chr15	43735400	43740585	5186	177	3.41304	3.41304	63.0158	exonized	DNA-5-2_DR	DNA/hAT-Tip100	chr15	43736883	43737059	-	12.6
ID=chr15:-:gene:43735400:43740585;children=UL_160;	UL_160	lincRNA	chr15	43735400	43740585	-	5186	5186	SINGLE	1	chr15	43735400	43740585	5186	167	3.22021	3.22021	63.0158	exonized	DNA-5-2_DR	DNA/hAT-Tip100	chr15	43736300	43736466	-	12.6
ID=chr15:-:gene:43735400:43740585;children=UL_160;	UL_160	lincRNA	chr15	43735400	43740585	-	5186	5186	SINGLE	1	chr15	43735400	43740585	5186	101	1.94755	1.94755	63.0158	exonized	DNA-5-2_DR	DNA/hAT-Tip100	chr15	43735831	43735931	-	12.6
ID=chr15:-:gene:43735400:43740585;children=UL_160;	UL_160	lincRNA	chr15	43735400	43740585	-	5186	5186	SINGLE	1	chr15	43735400	43740585	5186	191	3.68299	3.68299	63.0158	exonized	DNA-2-34_DR	DNA	chr15	43735556	43735746	-	12
ID=chr15:-:gene:43735400:43740585;children=UL_160;	UL_160	lincRNA	chr15	43735400	43740585	-	5186	5186	SINGLE	1	chr15	43735400	43740585	5186	11	0.21211	0.21211	63.0158	exonized	DANA	SINE/V	chr15	43735756	43735766	+	9.7
ID=chr15:-:gene:5467529:5473620;children=UL_140;	UL_140	lincRNA	chr15	5467529	5473620	-	6092	6092	SINGLE	1	chr15	5467529	5473620	6092	20	0.328299	0.328299	68.6146	exonized	TE-X-4_DR	Unknown	chr15	5469668	5469687	+	17.1
ID=chr15:-:gene:5467529:5473620;children=UL_140;	UL_140	lincRNA	chr15	5467529	5473620	-	6092	6092	SINGLE	1	chr15	5467529	5473620	6092	368	6.04071	6.04071	68.6146	exonized	TDR18	DNA/hAT-Charlie	chr15	5469688	5470055	-	10.6
ID=chr15:-:gene:5467529:5473620;children=UL_140;	UL_140	lincRNA	chr15	5467529	5473620	-	6092	6092	SINGLE	1	chr15	5467529	5473620	6092	1218	19.9934	19.9934	68.6146	exonized	TDR1	DNA/TcMar-Tc1	chr15	5467910	5469127	+	8.2
ID=chr15:-:gene:5467529:5473620;children=UL_140;	UL_140	lincRNA	chr15	5467529	5473620	-	6092	6092	SINGLE	1	chr15	5467529	5473620	6092	56	0.919238	0.919238	68.6146	exonized	EXPANDER1_DR	LINE/RTE	chr15	5472768	5472823	+	12.1
ID=chr15:-:gene:5467529:5473620;children=UL_140;	UL_140	lincRNA	chr15	5467529	5473620	-	6092	6092	SINGLE	1	chr15	5467529	5473620	6092	1626	26.6907	26.6907	68.6146	exonized	DNA-8-13_DR	DNA/hAT?	chr15	5471139	5472764	-	12.7
ID=chr15:-:gene:5467529:5473620;children=UL_140;	UL_140	lincRNA	chr15	5467529	5473620	-	6092	6092	SINGLE	1	chr15	5467529	5473620	6092	128	2.10112	2.10112	68.6146	exonized	DNA-8-13_DR	DNA/hAT?	chr15	5470931	5471058	-	12.7
ID=chr15:-:gene:5467529:5473620;children=UL_140;	UL_140	lincRNA	chr15	5467529	5473620	-	6092	6092	SINGLE	1	chr15	5467529	5473620	6092	144	2.36376	2.36376	68.6146	exonized	DNA-8-13_DR	DNA/hAT?	chr15	5470669	5470812	-	12.7
ID=chr15:-:gene:5467529:5473620;children=UL_140;	UL_140	lincRNA	chr15	5467529	5473620	-	6092	6092	SINGLE	1	chr15	5467529	5473620	6092	620	10.1773	10.1773	68.6146	exonized	CR1-34_DR	LINE/L2	chr15	5470046	5470665	-	16.3
ID=chr15:-:gene:6896015:6904555;children=UL_143;	UL_143	lincRNA	chr15	6896015	6904555	-	8541	2411	FIRST	1	chr15	6904278	6904555	278	222	79.8561	9.2078	21.7752	TSS	DNA-4-3_DR	DNA	chr15	6904334	6904577	+	9.4
ID=chr15:-:gene:6896015:6904555;children=UL_143;	UL_143	lincRNA	chr15	6896015	6904555	-	8541	2411	LAST	4	chr15	6896015	6897935	1921	150	7.80843	6.22148	21.7752	exonized	DNA-8-14_DR	DNA/hAT-Charlie	chr15	6896617	6896766	+	11.4
ID=chr15:-:gene:6896015:6904555;children=UL_143;	UL_143	lincRNA	chr15	6896015	6904555	-	8541	2411	LAST	4	chr15	6896015	6897935	1921	153	7.9646	6.34591	21.7752	exonized	DNA-2-32_DR	DNA	chr15	6896830	6896982	-	19.5
ID=chr15:-:gene:724310:726636;children=UL_138,UL_137;	UL_137	lincRNA	chr15	724310	726008	-	1699	1699	SINGLE	1	chr15	724310	726008	1699	84	4.94408	4.94408	49.7351	exonized	hAT-N45_DR	DNA/hAT?	chr15	725218	725301	+	10.3
ID=chr15:-:gene:724310:726636;children=UL_138,UL_137;	UL_137	lincRNA	chr15	724310	726008	-	1699	1699	SINGLE	1	chr15	724310	726008	1699	529	31.136	31.136	49.7351	exonized	TDR18	DNA/hAT-Charlie	chr15	724681	725209	-	10.6
ID=chr15:-:gene:724310:726636;children=UL_138,UL_137;	UL_137	lincRNA	chr15	724310	726008	-	1699	1699	SINGLE	1	chr15	724310	726008	1699	232	13.6551	13.6551	49.7351	exonized	TDR11	DNA	chr15	725473	725704	+	8.5
ID=chr15:-:gene:724310:726636;children=UL_138,UL_137;	UL_138	lincRNA	chr15	724310	726636	-	2327	2327	SINGLE	1	chr15	724310	726636	2327	84	3.6098	3.6098	36.3128	exonized	hAT-N45_DR	DNA/hAT?	chr15	725218	725301	+	10.3
ID=chr15:-:gene:724310:726636;children=UL_138,UL_137;	UL_138	lincRNA	chr15	724310	726636	-	2327	2327	SINGLE	1	chr15	724310	726636	2327	529	22.7331	22.7331	36.3128	exonized	TDR18	DNA/hAT-Charlie	chr15	724681	725209	-	10.6
ID=chr15:-:gene:724310:726636;children=UL_138,UL_137;	UL_138	lincRNA	chr15	724310	726636	-	2327	2327	SINGLE	1	chr15	724310	726636	2327	232	9.96992	9.96992	36.3128	exonized	TDR11	DNA	chr15	725473	725704	+	8.5
ID=chr15:-:gene:72901:83914;children=UL_136;	UL_136	lincRNA	chr15	72901	83914	-	11014	2907	LAST	5	chr15	72901	74901	2001	55	2.74863	1.89198	20.2958	exonized	TE-X-4_DR	Unknown	chr15	73687	73741	-	17.1
ID=chr15:-:gene:72901:83914;children=UL_136;	UL_136	lincRNA	chr15	72901	83914	-	11014	2907	LAST	5	chr15	72901	74901	2001	164	8.1959	5.64155	20.2958	exonized	HATN1_DR	DNA/hAT	chr15	74089	74252	+	12.1
ID=chr15:-:gene:72901:83914;children=UL_136;	UL_136	lincRNA	chr15	72901	83914	-	11014	2907	LAST	5	chr15	72901	74901	2001	68	3.3983	2.33918	20.2958	exonized	EnSpm-6N1_DR	DNA/En-Spm	chr15	73674	73741	-	16.4
ID=chr15:-:gene:72901:83914;children=UL_136;	UL_136	lincRNA	chr15	72901	83914	-	11014	2907	LAST	5	chr15	72901	74901	2001	303	15.1424	10.4231	20.2958	exonized	DNA-X-12_DR	DNA	chr15	73827	74129	-	17.1
ID=chr15:+:gene:10541353:10543321;children=Zv9_00034594;	Zv9_00034594	lincRNA	chr15	10541353	10543321	+	1969	567	FIRST	1	chr15	10541353	10541473	121	121	100	21.3404	21.3404	TSS_SPL	Kolobok-N6_DR	DNA/Kolobok?	chr15	10541321	10541524	+	11.9
ID=chr15:+:gene:16775484:16777009;children=UL_147;	UL_147	lincRNA	chr15	16775484	16777009	+	1526	1526	SINGLE	1	chr15	16775484	16777009	1526	94	6.1599	6.1599	10.0917	exonized	ANGEL	DNA/hAT	chr15	16776428	16776521	+	17.6
ID=chr15:+:gene:16775484:16777009;children=UL_147;	UL_147	lincRNA	chr15	16775484	16777009	+	1526	1526	SINGLE	1	chr15	16775484	16777009	1526	60	3.93185	3.93185	10.0917	exonized	ANGEL	DNA/hAT	chr15	16776279	16776338	-	17.6
ID=chr15:+:gene:16849319:16878060;children=Zv9_00034692;	Zv9_00034692	lincRNA	chr15	16849319	16878060	+	28742	702	FIRST	1	chr15	16849319	16849514	196	161	82.1429	22.9345	30.7692	TSS	HE1_DR1	SINE/V	chr15	16849175	16849479	-	13.2
ID=chr15:+:gene:16849319:16878060;children=Zv9_00034692;	Zv9_00034692	lincRNA	chr15	16849319	16878060	+	28742	702	MIDDLE	3	chr15	16873776	16873860	85	55	64.7059	7.83476	30.7692	SPL	TC1DR3	DNA/TcMar-Tc1	chr15	16873806	16873923	+	10.4
ID=chr15:+:gene:18714523:18717018;children=Zv9_00034705,Zv9_00034706;	Zv9_00034706	lincRNA	chr15	18714561	18717018	+	2458	1260	LAST	3	chr15	18716070	18717018	949	114	12.0126	9.04762	38.0159	exonized	TE-X-4_DR	Unknown	chr15	18716584	18716697	+	17.1
ID=chr15:+:gene:18714523:18717018;children=Zv9_00034705,Zv9_00034706;	Zv9_00034706	lincRNA	chr15	18714561	18717018	+	2458	1260	LAST	3	chr15	18716070	18717018	949	39	4.10959	3.09524	38.0159	exonized	DNA13TA1a_DR	DNA/TcMar-Tc1	chr15	18716531	18716569	+	8
ID=chr15:+:gene:18714523:18717018;children=Zv9_00034705,Zv9_00034706;	Zv9_00034706	lincRNA	chr15	18714561	18717018	+	2458	1260	LAST	3	chr15	18716070	18717018	949	326	34.3519	25.873	38.0159	PolyA	DNA-TTAA-2_DR	DNA/PiggyBac?	chr15	18716693	18717233	+	12.8
ID=chr15:+:gene:20742406:20782960;children=Zv9_00034771;	Zv9_00034771	lincRNA	chr15	20742406	20782960	+	40555	479	FIRST	1	chr15	20742406	20742826	421	196	46.5558	40.9186	40.9186	exonized	Harbinger-N9_DR	DNA/Harbinger	chr15	20742500	20742695	-	13.6
ID=chr15:+:gene:2836465:2847282;children=Zv9_00034478;	Zv9_00034478	lincRNA	chr15	2836465	2847282	+	10818	425	FIRST	1	chr15	2836465	2836508	44	11	25	2.58824	12.2353	SPL	Kolobok-1_DR	DNA/Kolobok	chr15	2836498	2836670	+	16.7
ID=chr15:+:gene:2836465:2847282;children=Zv9_00034478;	Zv9_00034478	lincRNA	chr15	2836465	2847282	+	10818	425	LAST	2	chr15	2846902	2847282	381	41	10.7612	9.64706	12.2353	PolyA	RTEX-2_DR	LINE/RTE-BovB	chr15	2847242	2847287	+	12.9
ID=chr15:+:gene:35664069:35721118;children=UL_156;	UL_156	lincRNA	chr15	35664069	35721118	+	57050	9023	LAST	8	chr15	35712680	35721118	8439	44	0.521389	0.487643	39.9645	exonized	hAT-N70_DR	DNA/hAT?	chr15	35720398	35720441	-	11.7
ID=chr15:+:gene:35664069:35721118;children=UL_156;	UL_156	lincRNA	chr15	35664069	35721118	+	57050	9023	LAST	8	chr15	35712680	35721118	8439	94	1.11388	1.04178	39.9645	exonized	hAT-N31_DR	DNA/hAT?	chr15	35713607	35713700	-	13.5
ID=chr15:+:gene:35664069:35721118;children=UL_156;	UL_156	lincRNA	chr15	35664069	35721118	+	57050	9023	LAST	8	chr15	35712680	35721118	8439	484	5.73528	5.36407	39.9645	exonized	TDR7	DNA	chr15	35717791	35718274	+	12.5
ID=chr15:+:gene:35664069:35721118;children=UL_156;	UL_156	lincRNA	chr15	35664069	35721118	+	57050	9023	LAST	8	chr15	35712680	35721118	8439	194	2.29885	2.15006	39.9645	exonized	TDR19	DNA/hAT	chr15	35716222	35716415	+	19.4
ID=chr15:+:gene:35664069:35721118;children=UL_156;	UL_156	lincRNA	chr15	35664069	35721118	+	57050	9023	LAST	8	chr15	35712680	35721118	8439	133	1.57602	1.47401	39.9645	exonized	TDR13	DNA	chr15	35715504	35715636	-	15.4
ID=chr15:+:gene:35664069:35721118;children=UL_156;	UL_156	lincRNA	chr15	35664069	35721118	+	57050	9023	LAST	8	chr15	35712680	35721118	8439	85	1.00723	0.942037	39.9645	exonized	TDR13	DNA	chr15	35715421	35715505	-	15.4
ID=chr15:+:gene:35664069:35721118;children=UL_156;	UL_156	lincRNA	chr15	35664069	35721118	+	57050	9023	LAST	8	chr15	35712680	35721118	8439	303	3.59047	3.35808	39.9645	exonized	HarbingerN6_DR	DNA/Harbinger	chr15	35714396	35714698	-	14.9
ID=chr15:+:gene:35664069:35721118;children=UL_156;	UL_156	lincRNA	chr15	35664069	35721118	+	57050	9023	LAST	8	chr15	35712680	35721118	8439	95	1.12573	1.05286	39.9645	exonized	HATN8_DR	DNA	chr15	35720078	35720172	-	12.7
ID=chr15:+:gene:35664069:35721118;children=UL_156;	UL_156	lincRNA	chr15	35664069	35721118	+	57050	9023	LAST	8	chr15	35712680	35721118	8439	250	2.96244	2.7707	39.9645	exonized	HATN8_DR	DNA	chr15	35719828	35720077	-	12.7
ID=chr15:+:gene:35664069:35721118;children=UL_156;	UL_156	lincRNA	chr15	35664069	35721118	+	57050	9023	LAST	8	chr15	35712680	35721118	8439	166	1.96706	1.83974	39.9645	exonized	HATN8_DR	DNA	chr15	35719662	35719827	-	12.7
ID=chr15:+:gene:35664069:35721118;children=UL_156;	UL_156	lincRNA	chr15	35664069	35721118	+	57050	9023	LAST	8	chr15	35712680	35721118	8439	167	1.97891	1.85083	39.9645	exonized	HATN8_DR	DNA	chr15	35719495	35719661	-	12.7
ID=chr15:+:gene:35664069:35721118;children=UL_156;	UL_156	lincRNA	chr15	35664069	35721118	+	57050	9023	LAST	8	chr15	35712680	35721118	8439	161	1.90781	1.78433	39.9645	exonized	HATN8_DR	DNA	chr15	35719332	35719492	-	12.7
ID=chr15:+:gene:35664069:35721118;children=UL_156;	UL_156	lincRNA	chr15	35664069	35721118	+	57050	9023	LAST	8	chr15	35712680	35721118	8439	166	1.96706	1.83974	39.9645	exonized	HATN8_DR	DNA	chr15	35719166	35719331	-	12.7
ID=chr15:+:gene:35664069:35721118;children=UL_156;	UL_156	lincRNA	chr15	35664069	35721118	+	57050	9023	LAST	8	chr15	35712680	35721118	8439	140	1.65896	1.55159	39.9645	exonized	HATN8_DR	DNA	chr15	35719026	35719165	-	12.7
ID=chr15:+:gene:35664069:35721118;children=UL_156;	UL_156	lincRNA	chr15	35664069	35721118	+	57050	9023	LAST	8	chr15	35712680	35721118	8439	261	3.09278	2.89261	39.9645	exonized	HATN14_DR	DNA/hAT	chr15	35715063	35715323	-	16.6
ID=chr15:+:gene:35664069:35721118;children=UL_156;	UL_156	lincRNA	chr15	35664069	35721118	+	57050	9023	LAST	8	chr15	35712680	35721118	8439	255	3.02169	2.82611	39.9645	exonized	EnSpm-N5_DR	DNA/En-Spm	chr15	35717190	35717444	-	15
ID=chr15:+:gene:35664069:35721118;children=UL_156;	UL_156	lincRNA	chr15	35664069	35721118	+	57050	9023	LAST	8	chr15	35712680	35721118	8439	131	1.55232	1.45185	39.9645	exonized	DNA-X-11_DR	DNA	chr15	35713683	35713813	-	13.3
ID=chr15:+:gene:35664069:35721118;children=UL_156;	UL_156	lincRNA	chr15	35664069	35721118	+	57050	9023	LAST	8	chr15	35712680	35721118	8439	334	3.95781	3.70165	39.9645	exonized	DNA-8-22_DR	DNA/hAT?	chr15	35713830	35714163	+	13.3
ID=chr15:+:gene:35664069:35721118;children=UL_156;	UL_156	lincRNA	chr15	35664069	35721118	+	57050	9023	LAST	8	chr15	35712680	35721118	8439	143	1.69451	1.58484	39.9645	exonized	DNA-8-22_DR	DNA/hAT?	chr15	35713585	35713727	+	13.3
ID=chr15:+:gene:3812299:3816947;children=Zv9_00034511;	Zv9_00034511	lincRNA	chr15	3812299	3816947	+	4649	1021	FIRST	1	chr15	3812299	3812565	267	90	33.7079	8.81489	44.6621	exonized	hAT-N35_DR	DNA/hAT?	chr15	3812344	3812433	-	10.3
ID=chr15:+:gene:3812299:3816947;children=Zv9_00034511;	Zv9_00034511	lincRNA	chr15	3812299	3816947	+	4649	1021	FIRST	1	chr15	3812299	3812565	267	42	15.7303	4.11361	44.6621	TSS	Tc1-4_DR	DNA/TcMar-Tc1	chr15	3812126	3812340	+	11.7
ID=chr15:+:gene:3812299:3816947;children=Zv9_00034511;	Zv9_00034511	lincRNA	chr15	3812299	3816947	+	4649	1021	LAST	3	chr15	3816361	3816947	587	63	10.7325	6.17042	44.6621	exonized	TE-X-4_DR	Unknown	chr15	3816551	3816613	+	17.1
ID=chr15:+:gene:3812299:3816947;children=Zv9_00034511;	Zv9_00034511	lincRNA	chr15	3812299	3816947	+	4649	1021	LAST	3	chr15	3816361	3816947	587	190	32.368	18.6092	44.6621	SPL	HE1_DR1	SINE/V	chr15	3816326	3816550	-	13.2
ID=chr15:+:gene:3812299:3816947;children=Zv9_00034511;	Zv9_00034511	lincRNA	chr15	3812299	3816947	+	4649	1021	LAST	3	chr15	3816361	3816947	587	71	12.0954	6.95397	44.6621	exonized	DIRS-8_DR	LTR/Ngaro	chr15	3816554	3816624	-	15.8
ID=chr15:+:gene:40755972:40757114;children=UL_159;	UL_159	lincRNA	chr15	40755972	40757114	+	1143	1143	SINGLE	1	chr15	40755972	40757114	1143	54	4.72441	4.72441	4.72441	TSS	DNA-2-12_DR	DNA/En-Spm?	chr15	40755248	40756025	-	16.6
ID=chr15:+:gene:44821275:44824535;children=Zv9_00035253;	Zv9_00035253	lincRNA	chr15	44821275	44824535	+	3261	542	LAST	2	chr15	44824327	44824535	209	78	37.3206	14.3911	26.7528	exonized	Kolobok-N4_DR	DNA/Kolobok	chr15	44824446	44824523	+	18.7
ID=chr15:+:gene:44821275:44824535;children=Zv9_00035253;	Zv9_00035253	lincRNA	chr15	44821275	44824535	+	3261	542	LAST	2	chr15	44824327	44824535	209	67	32.0574	12.3616	26.7528	exonized	ANGEL	DNA/hAT	chr15	44824464	44824530	-	17.6
ID=chr15:+:gene:46143634:46145349;children=Zv9_00035274,Zv9_00035275;	Zv9_00035274	lincRNA	chr15	46143634	46145203	+	1570	436	FIRST	1	chr15	46143634	46143847	214	76	35.514	17.4312	35.3211	TSS	Mariner-N2_DR	DNA/TcMar	chr15	46143518	46143709	+	16.5
ID=chr15:+:gene:46143634:46145349;children=Zv9_00035274,Zv9_00035275;	Zv9_00035274	lincRNA	chr15	46143634	46145203	+	1570	436	FIRST	1	chr15	46143634	46143847	214	78	36.4486	17.8899	35.3211	TSS	HE1_DR1	SINE/V	chr15	46143543	46143711	-	13.2
ID=chr15:+:gene:46143634:46145349;children=Zv9_00035274,Zv9_00035275;	Zv9_00035275	lincRNA	chr15	46143800	46145349	+	1550	410	LAST	2	chr15	46144988	46145349	362	114	31.4917	27.8049	27.8049	PolyA	Kolobok-N5_DR	DNA/Kolobok?	chr15	46145236	46145571	+	14.6
ID=chr15:+:gene:46145506:46150445;children=Zv9_00035276;	Zv9_00035276	lincRNA	chr15	46145506	46150445	+	4940	245	FIRST	1	chr15	46145506	46145517	12	12	100	4.89796	4.89796	TSS_SPL	Kolobok-N5_DR	DNA/Kolobok?	chr15	46145236	46145571	+	14.6
ID=chr15:+:gene:47030431:47032472;children=Zv9_00035330;	Zv9_00035330	lincRNA	chr15	47030431	47032472	+	2042	672	LAST	2	chr15	47031836	47032472	637	23	3.61068	3.42262	22.0238	exonized	hAT-N53_DR	DNA/hAT?	chr15	47032314	47032336	-	15.5
ID=chr15:+:gene:47030431:47032472;children=Zv9_00035330;	Zv9_00035330	lincRNA	chr15	47030431	47032472	+	2042	672	LAST	2	chr15	47031836	47032472	637	16	2.51177	2.38095	22.0238	exonized	hAT-N53_DR	DNA/hAT?	chr15	47032278	47032293	-	15.5
ID=chr15:+:gene:47030431:47032472;children=Zv9_00035330;	Zv9_00035330	lincRNA	chr15	47030431	47032472	+	2042	672	LAST	2	chr15	47031836	47032472	637	109	17.1115	16.2202	22.0238	PolyA	Harbinger-N10_DR	DNA/Harbinger	chr15	47032364	47032476	-	13.3
ID=chr15:+:gene:8897896:8900345;children=Zv9_00034573;	Zv9_00034573	lincRNA	chr15	8897896	8900345	+	2450	1214	LAST	2	chr15	8899549	8900345	797	12	1.50565	0.988468	23.888	exonized	hAT-N21_DR	DNA/hAT-Charlie	chr15	8900056	8900067	+	14.2
ID=chr15:+:gene:8897896:8900345;children=Zv9_00034573;	Zv9_00034573	lincRNA	chr15	8897896	8900345	+	2450	1214	LAST	2	chr15	8899549	8900345	797	278	34.8808	22.8995	23.888	PolyA	TDR18	DNA/hAT-Charlie	chr15	8900068	8900579	-	10.6
ID=chr16:-:gene:13142060:13288375;children=Zv9_00037833;	Zv9_00037833	lincRNA	chr16	13142060	13288375	-	146316	332	LAST	3	chr16	13142060	13142138	79	52	65.8228	15.6627	15.6627	PolyA	TC1DR3	DNA/TcMar-Tc1	chr16	13141799	13142111	-	10.4
ID=chr16:-:gene:1366646:1375682;children=UL_165;	UL_165	lincRNA	chr16	1366646	1375682	-	9037	2360	FIRST	1	chr16	1375450	1375682	233	52	22.3176	2.20339	30.5932	TSS	hAT-N65_DR	DNA/hAT?	chr16	1375631	1375949	-	11.3
ID=chr16:-:gene:1366646:1375682;children=UL_165;	UL_165	lincRNA	chr16	1366646	1375682	-	9037	2360	FIRST	1	chr16	1375450	1375682	233	86	36.9099	3.64407	30.5932	exonized	hAT-N65_DR	DNA/hAT?	chr16	1375573	1375658	-	11.3
ID=chr16:-:gene:1366646:1375682;children=UL_165;	UL_165	lincRNA	chr16	1366646	1375682	-	9037	2360	LAST	5	chr16	1366646	1368108	1463	13	0.888585	0.550847	30.5932	exonized	TE-X-4_DR	Unknown	chr16	1367008	1367020	+	17.1
ID=chr16:-:gene:1366646:1375682;children=UL_165;	UL_165	lincRNA	chr16	1366646	1375682	-	9037	2360	LAST	5	chr16	1366646	1368108	1463	443	30.2802	18.7712	30.5932	exonized	HarbingerN7_DR	DNA/Harbinger	chr16	1367263	1367705	+	16.2
ID=chr16:-:gene:1366646:1375682;children=UL_165;	UL_165	lincRNA	chr16	1366646	1375682	-	9037	2360	LAST	5	chr16	1366646	1368108	1463	87	5.94668	3.68644	30.5932	exonized	HE1_DR1	SINE/V	chr16	1367021	1367107	+	13.2
ID=chr16:-:gene:1366646:1375682;children=UL_165;	UL_165	lincRNA	chr16	1366646	1375682	-	9037	2360	LAST	5	chr16	1366646	1368108	1463	41	2.80246	1.73729	30.5932	exonized	DNA-1-2_DR	DNA	chr16	1366975	1367015	-	16.2
ID=chr16:-:gene:14275175:14282470;children=Zv9_00037861;	Zv9_00037861	lincRNA	chr16	14275175	14282470	-	7296	829	LAST	2	chr16	14275175	14275765	591	22	3.7225	2.6538	2.6538	PolyA	TDR18	DNA/hAT-Charlie	chr16	14274721	14275196	-	10.6
ID=chr16:-:gene:15609093:15611902;children=Zv9_00037901,Zv9_00037899;	Zv9_00037899	lincRNA	chr16	15609093	15611902	-	2810	1019	LAST	2	chr16	15609093	15609916	824	146	17.7184	14.3278	14.3278	exonized	DNA-8-9_DR	DNA/hAT-Ac?	chr16	15609119	15609264	-	18.1
ID=chr16:-:gene:19399:20569;children=UL_164;	UL_164	lincRNA	chr16	19399	20569	-	1171	1171	SINGLE	1	chr16	19399	20569	1171	219	18.702	18.702	18.702	exonized	RTEX-1_DR	LINE/RTE-BovB	chr16	19910	20128	-	13.8
ID=chr16:-:gene:22397110:22400404;children=UL_175;	UL_175	lincRNA	chr16	22397110	22400404	-	3295	2491	FIRST	1	chr16	22399743	22400404	662	169	25.5287	6.78442	6.78442	exonized	ANGEL	DNA/hAT	chr16	22400236	22400404	-	17.6
ID=chr16:-:gene:23007912:23011555;children=UL_177,UL_176;	UL_176	lincRNA	chr16	23007912	23010569	-	2658	2658	SINGLE	1	chr16	23007912	23010569	2658	109	4.10083	4.10083	10.1204	exonized	DNA-6-N2_DR	DNA	chr16	23008855	23008963	-	11.2
ID=chr16:-:gene:23007912:23011555;children=UL_177,UL_176;	UL_176	lincRNA	chr16	23007912	23010569	-	2658	2658	SINGLE	1	chr16	23007912	23010569	2658	120	4.51467	4.51467	10.1204	exonized	DNA-6-N2_DR	DNA	chr16	23008831	23008950	+	11.2
ID=chr16:-:gene:23007912:23011555;children=UL_177,UL_176;	UL_176	lincRNA	chr16	23007912	23010569	-	2658	2658	SINGLE	1	chr16	23007912	23010569	2658	40	1.50489	1.50489	10.1204	exonized	DNA-2-32_DR	DNA	chr16	23009718	23009757	-	19.5
ID=chr16:-:gene:23007912:23011555;children=UL_177,UL_176;	UL_177	lincRNA	chr16	23007912	23011555	-	3644	3644	SINGLE	1	chr16	23007912	23011555	3644	109	2.99122	2.99122	7.382	exonized	DNA-6-N2_DR	DNA	chr16	23008855	23008963	-	11.2
ID=chr16:-:gene:23007912:23011555;children=UL_177,UL_176;	UL_177	lincRNA	chr16	23007912	23011555	-	3644	3644	SINGLE	1	chr16	23007912	23011555	3644	120	3.29308	3.29308	7.382	exonized	DNA-6-N2_DR	DNA	chr16	23008831	23008950	+	11.2
ID=chr16:-:gene:23007912:23011555;children=UL_177,UL_176;	UL_177	lincRNA	chr16	23007912	23011555	-	3644	3644	SINGLE	1	chr16	23007912	23011555	3644	40	1.09769	1.09769	7.382	exonized	DNA-2-32_DR	DNA	chr16	23009718	23009757	-	19.5
ID=chr16:-:gene:23985609:23988121;children=Zv9_00038049;	Zv9_00038049	lincRNA	chr16	23985609	23988121	-	2513	1264	FIRST	1	chr16	23988006	23988121	116	22	18.9655	1.74051	24.2089	SPL	HATN8_DR	DNA	chr16	23987778	23988027	+	12.7
ID=chr16:-:gene:23985609:23988121;children=Zv9_00038049;	Zv9_00038049	lincRNA	chr16	23985609	23988121	-	2513	1264	LAST	2	chr16	23985609	23986756	1148	284	24.7387	22.4684	24.2089	exonized	ANGEL	DNA/hAT	chr16	23985708	23985991	+	17.6
ID=chr16:-:gene:24204119:24215580;children=UL_178,UL_179;	UL_178	lincRNA	chr16	24204119	24214143	-	10025	4390	FIRST	1	chr16	24213617	24214143	527	79	14.9905	1.79954	45.262	exonized	DNA-8-4_DR	DNA/hAT	chr16	24213696	24213774	+	12.2
ID=chr16:-:gene:24204119:24215580;children=UL_178,UL_179;	UL_178	lincRNA	chr16	24204119	24214143	-	10025	4390	LAST	8	chr16	24204119	24207530	3412	12	0.3517	0.273349	45.262	exonized	HE1_DR1	SINE/V	chr16	24206596	24206607	-	13.2
ID=chr16:-:gene:24204119:24215580;children=UL_178,UL_179;	UL_178	lincRNA	chr16	24204119	24214143	-	10025	4390	LAST	8	chr16	24204119	24207530	3412	344	10.0821	7.83599	45.262	exonized	HE1_DR1	SINE/V	chr16	24206178	24206521	-	13.2
ID=chr16:-:gene:24204119:24215580;children=UL_178,UL_179;	UL_178	lincRNA	chr16	24204119	24214143	-	10025	4390	LAST	8	chr16	24204119	24207530	3412	22	0.644783	0.501139	45.262	exonized	HATN17_DR	DNA/hAT	chr16	24206937	24206958	+	14.2
ID=chr16:-:gene:24204119:24215580;children=UL_178,UL_179;	UL_178	lincRNA	chr16	24204119	24214143	-	10025	4390	LAST	8	chr16	24204119	24207530	3412	123	3.60492	2.80182	45.262	exonized	HATN17_DR	DNA/hAT	chr16	24206789	24206911	+	14.2
ID=chr16:-:gene:24204119:24215580;children=UL_178,UL_179;	UL_178	lincRNA	chr16	24204119	24214143	-	10025	4390	LAST	8	chr16	24204119	24207530	3412	248	7.26846	5.6492	45.262	exonized	DNA-6-N2_DR	DNA	chr16	24206664	24206911	+	11.2
ID=chr16:-:gene:24204119:24215580;children=UL_178,UL_179;	UL_178	lincRNA	chr16	24204119	24214143	-	10025	4390	LAST	8	chr16	24204119	24207530	3412	130	3.81008	2.96128	45.262	exonized	DNA-5-2_DR	DNA/hAT-Tip100	chr16	24205154	24205283	+	12.6
ID=chr16:-:gene:24204119:24215580;children=UL_178,UL_179;	UL_178	lincRNA	chr16	24204119	24214143	-	10025	4390	LAST	8	chr16	24204119	24207530	3412	640	18.7573	14.5786	45.262	exonized	DNA-5-2_DR	DNA/hAT-Tip100	chr16	24204449	24205088	+	12.6
ID=chr16:-:gene:24204119:24215580;children=UL_178,UL_179;	UL_178	lincRNA	chr16	24204119	24214143	-	10025	4390	LAST	8	chr16	24204119	24207530	3412	112	3.28253	2.55125	45.262	exonized	DIRS-4N2_DR	LTR/Ngaro	chr16	24206608	24206719	+	15.9
ID=chr16:-:gene:24204119:24215580;children=UL_178,UL_179;	UL_178	lincRNA	chr16	24204119	24214143	-	10025	4390	LAST	8	chr16	24204119	24207530	3412	277	8.11841	6.30979	45.262	exonized	DANA	SINE/V	chr16	24206632	24206908	+	9.7
ID=chr16:-:gene:24204119:24215580;children=UL_178,UL_179;	UL_179	lincRNA	chr16	24207122	24215580	-	8459	2824	FIRST	1	chr16	24213617	24215580	1964	79	4.0224	2.79745	2.79745	exonized	DNA-8-4_DR	DNA/hAT	chr16	24213696	24213774	+	12.2
ID=chr16:-:gene:27238960:27251679;children=Zv9_00038123;	Zv9_00038123	lincRNA	chr16	27238960	27251679	-	12720	1145	LAST	2	chr16	27238960	27239421	462	60	12.987	5.24017	40.4367	SPL	Tc1-4_DR	DNA/TcMar-Tc1	chr16	27239362	27239465	+	11.7
ID=chr16:-:gene:27238960:27251679;children=Zv9_00038123;	Zv9_00038123	lincRNA	chr16	27238960	27251679	-	12720	1145	LAST	2	chr16	27238960	27239421	462	46	9.95671	4.01747	40.4367	PolyA	Tc1-4_DR	DNA/TcMar-Tc1	chr16	27238863	27239005	+	11.7
ID=chr16:-:gene:27238960:27251679;children=Zv9_00038123;	Zv9_00038123	lincRNA	chr16	27238960	27251679	-	12720	1145	LAST	2	chr16	27238960	27239421	462	357	77.2727	31.179	40.4367	exonized	HE1_DR1	SINE/V	chr16	27239006	27239362	+	13.2
ID=chr16:-:gene:33813003:33815880;children=Zv9_00038310;	Zv9_00038310	lincRNA	chr16	33813003	33815880	-	2878	730	LAST	2	chr16	33813003	33813650	648	116	17.9012	15.8904	23.8356	exonized	EnSpm-N3_DR	DNA/En-Spm?	chr16	33813086	33813201	-	10.7
ID=chr16:-:gene:33813003:33815880;children=Zv9_00038310;	Zv9_00038310	lincRNA	chr16	33813003	33815880	-	2878	730	LAST	2	chr16	33813003	33813650	648	58	8.95062	7.94521	23.8356	PolyA	EnSpm-N3_DR	DNA/En-Spm?	chr16	33812781	33813060	-	10.7
ID=chr16:-:gene:44492440:44507458;children=Zv9_00038565,Zv9_00038564,Zv9_00038563;	Zv9_00038565	lincRNA	chr16	44496126	44507387	-	11262	1118	LAST	3	chr16	44496126	44496877	752	92	12.234	8.22898	14.3113	PolyA	TDR2	DNA/TcMar-Tc1	chr16	44495369	44496217	-	8.1
ID=chr16:-:gene:44492440:44507458;children=Zv9_00038565,Zv9_00038564,Zv9_00038563;	Zv9_00038565	lincRNA	chr16	44496126	44507387	-	11262	1118	LAST	3	chr16	44496126	44496877	752	68	9.04255	6.08229	14.3113	exonized	ANGEL	DNA/hAT	chr16	44496228	44496295	+	17.6
ID=chr16:-:gene:47923059:47933794;children=UL_206;	UL_206	lincRNA	chr16	47923059	47933794	-	10736	1491	FIRST	1	chr16	47933008	47933794	787	11	1.39771	0.73776	45.2716	TSS	TDR25	DNA	chr16	47933784	47934068	-	14.7
ID=chr16:-:gene:47923059:47933794;children=UL_206;	UL_206	lincRNA	chr16	47923059	47933794	-	10736	1491	FIRST	1	chr16	47933008	47933794	787	187	23.7611	12.5419	45.2716	exonized	TDR25	DNA	chr16	47933580	47933766	-	14.7
ID=chr16:-:gene:47923059:47933794;children=UL_206;	UL_206	lincRNA	chr16	47923059	47933794	-	10736	1491	FIRST	1	chr16	47933008	47933794	787	477	60.6099	31.992	45.2716	SPL	CR1-1_DR	LINE/L2	chr16	47932789	47933484	-	9.8
ID=chr16:-:gene:49151552:49161495;children=UL_207,UL_208;	UL_207	lincRNA	chr16	49151552	49157973	-	6422	6422	SINGLE	1	chr16	49151552	49157973	6422	101	1.57272	1.57272	49.0969	exonized	hAT-N31_DR	DNA/hAT?	chr16	49154201	49154301	+	13.5
ID=chr16:-:gene:49151552:49161495;children=UL_207,UL_208;	UL_207	lincRNA	chr16	49151552	49157973	-	6422	6422	SINGLE	1	chr16	49151552	49157973	6422	61	0.94986	0.94986	49.0969	exonized	TDR8B	DNA/hAT?	chr16	49153309	49153369	+	12.3
ID=chr16:-:gene:49151552:49161495;children=UL_207,UL_208;	UL_207	lincRNA	chr16	49151552	49157973	-	6422	6422	SINGLE	1	chr16	49151552	49157973	6422	11	0.171286	0.171286	49.0969	exonized	TDR8B	DNA/hAT?	chr16	49152897	49152907	-	12.3
ID=chr16:-:gene:49151552:49161495;children=UL_207,UL_208;	UL_207	lincRNA	chr16	49151552	49157973	-	6422	6422	SINGLE	1	chr16	49151552	49157973	6422	59	0.918717	0.918717	49.0969	exonized	TDR8	DNA	chr16	49153303	49153361	+	13.3
ID=chr16:-:gene:49151552:49161495;children=UL_207,UL_208;	UL_207	lincRNA	chr16	49151552	49157973	-	6422	6422	SINGLE	1	chr16	49151552	49157973	6422	218	3.39458	3.39458	49.0969	exonized	TDR8	DNA	chr16	49152908	49153125	+	13.3
ID=chr16:-:gene:49151552:49161495;children=UL_207,UL_208;	UL_207	lincRNA	chr16	49151552	49157973	-	6422	6422	SINGLE	1	chr16	49151552	49157973	6422	35	0.545002	0.545002	49.0969	exonized	TDR3	DNA/hAT-Charlie	chr16	49154567	49154601	-	16.3
ID=chr16:-:gene:49151552:49161495;children=UL_207,UL_208;	UL_207	lincRNA	chr16	49151552	49157973	-	6422	6422	SINGLE	1	chr16	49151552	49157973	6422	225	3.50358	3.50358	49.0969	exonized	TDR19	DNA/hAT	chr16	49154548	49154772	+	19.4
ID=chr16:-:gene:49151552:49161495;children=UL_207,UL_208;	UL_207	lincRNA	chr16	49151552	49157973	-	6422	6422	SINGLE	1	chr16	49151552	49157973	6422	153	2.38244	2.38244	49.0969	exonized	Kolobok-N7_DR	DNA/Kolobok	chr16	49151568	49151720	-	13.1
ID=chr16:-:gene:49151552:49161495;children=UL_207,UL_208;	UL_207	lincRNA	chr16	49151552	49157973	-	6422	6422	SINGLE	1	chr16	49151552	49157973	6422	50	0.778574	0.778574	49.0969	exonized	Kolobok-N2_DR	DNA/Kolobok	chr16	49154464	49154513	-	14.7
ID=chr16:-:gene:49151552:49161495;children=UL_207,UL_208;	UL_207	lincRNA	chr16	49151552	49157973	-	6422	6422	SINGLE	1	chr16	49151552	49157973	6422	70	1.09	1.09	49.0969	exonized	Kolobok-N2A_DR	DNA/Kolobok	chr16	49155186	49155255	+	13.9
ID=chr16:-:gene:49151552:49161495;children=UL_207,UL_208;	UL_207	lincRNA	chr16	49151552	49157973	-	6422	6422	SINGLE	1	chr16	49151552	49157973	6422	135	2.10215	2.10215	49.0969	exonized	HATN8_DR	DNA	chr16	49154292	49154426	+	12.7
ID=chr16:-:gene:49151552:49161495;children=UL_207,UL_208;	UL_207	lincRNA	chr16	49151552	49157973	-	6422	6422	SINGLE	1	chr16	49151552	49157973	6422	45	0.700716	0.700716	49.0969	exonized	HATN8_DR	DNA	chr16	49153542	49153586	+	12.7
ID=chr16:-:gene:49151552:49161495;children=UL_207,UL_208;	UL_207	lincRNA	chr16	49151552	49157973	-	6422	6422	SINGLE	1	chr16	49151552	49157973	6422	481	7.48988	7.48988	49.0969	exonized	DNA25TWA1_DR	DNA	chr16	49155613	49156093	+	14.4
ID=chr16:-:gene:49151552:49161495;children=UL_207,UL_208;	UL_207	lincRNA	chr16	49151552	49157973	-	6422	6422	SINGLE	1	chr16	49151552	49157973	6422	187	2.91187	2.91187	49.0969	exonized	DNA11TA1_DR	DNA/TcMar-Tc1	chr16	49156417	49156603	-	14.2
ID=chr16:-:gene:49151552:49161495;children=UL_207,UL_208;	UL_207	lincRNA	chr16	49151552	49157973	-	6422	6422	SINGLE	1	chr16	49151552	49157973	6422	445	6.92931	6.92931	49.0969	exonized	DNA-X-11_DR	DNA	chr16	49153776	49154220	+	13.3
ID=chr16:-:gene:49151552:49161495;children=UL_207,UL_208;	UL_207	lincRNA	chr16	49151552	49157973	-	6422	6422	SINGLE	1	chr16	49151552	49157973	6422	522	8.12831	8.12831	49.0969	exonized	DNA-TTAA-2_DR	DNA/PiggyBac?	chr16	49153587	49154108	-	12.8
ID=chr16:-:gene:49151552:49161495;children=UL_207,UL_208;	UL_207	lincRNA	chr16	49151552	49157973	-	6422	6422	SINGLE	1	chr16	49151552	49157973	6422	157	2.44472	2.44472	49.0969	exonized	DNA-8-34_DR	DNA/hAT-Tip100	chr16	49154602	49154758	+	13.8
ID=chr16:-:gene:49151552:49161495;children=UL_207,UL_208;	UL_207	lincRNA	chr16	49151552	49157973	-	6422	6422	SINGLE	1	chr16	49151552	49157973	6422	81	1.26129	1.26129	49.0969	exonized	DNA-2-7_DR	DNA/En-Spm?	chr16	49156800	49156880	-	20.3
ID=chr16:-:gene:49151552:49161495;children=UL_207,UL_208;	UL_207	lincRNA	chr16	49151552	49157973	-	6422	6422	SINGLE	1	chr16	49151552	49157973	6422	117	1.82186	1.82186	49.0969	exonized	ANGEL	DNA/hAT	chr16	49157161	49157277	+	17.6
ID=chr16:-:gene:49151552:49161495;children=UL_207,UL_208;	UL_208	lincRNA	chr16	49151552	49161495	-	9944	6605	LAST	2	chr16	49151552	49157751	6200	101	1.62903	1.52914	47.7366	exonized	hAT-N31_DR	DNA/hAT?	chr16	49154201	49154301	+	13.5
ID=chr16:-:gene:49151552:49161495;children=UL_207,UL_208;	UL_208	lincRNA	chr16	49151552	49161495	-	9944	6605	LAST	2	chr16	49151552	49157751	6200	61	0.983871	0.923543	47.7366	exonized	TDR8B	DNA/hAT?	chr16	49153309	49153369	+	12.3
ID=chr16:-:gene:49151552:49161495;children=UL_207,UL_208;	UL_208	lincRNA	chr16	49151552	49161495	-	9944	6605	LAST	2	chr16	49151552	49157751	6200	11	0.177419	0.16654	47.7366	exonized	TDR8B	DNA/hAT?	chr16	49152897	49152907	-	12.3
ID=chr16:-:gene:49151552:49161495;children=UL_207,UL_208;	UL_208	lincRNA	chr16	49151552	49161495	-	9944	6605	LAST	2	chr16	49151552	49157751	6200	59	0.951613	0.893263	47.7366	exonized	TDR8	DNA	chr16	49153303	49153361	+	13.3
ID=chr16:-:gene:49151552:49161495;children=UL_207,UL_208;	UL_208	lincRNA	chr16	49151552	49161495	-	9944	6605	LAST	2	chr16	49151552	49157751	6200	218	3.51613	3.30053	47.7366	exonized	TDR8	DNA	chr16	49152908	49153125	+	13.3
ID=chr16:-:gene:49151552:49161495;children=UL_207,UL_208;	UL_208	lincRNA	chr16	49151552	49161495	-	9944	6605	LAST	2	chr16	49151552	49157751	6200	35	0.564516	0.529902	47.7366	exonized	TDR3	DNA/hAT-Charlie	chr16	49154567	49154601	-	16.3
ID=chr16:-:gene:49151552:49161495;children=UL_207,UL_208;	UL_208	lincRNA	chr16	49151552	49161495	-	9944	6605	LAST	2	chr16	49151552	49157751	6200	225	3.62903	3.40651	47.7366	exonized	TDR19	DNA/hAT	chr16	49154548	49154772	+	19.4
ID=chr16:-:gene:49151552:49161495;children=UL_207,UL_208;	UL_208	lincRNA	chr16	49151552	49161495	-	9944	6605	LAST	2	chr16	49151552	49157751	6200	153	2.46774	2.31643	47.7366	exonized	Kolobok-N7_DR	DNA/Kolobok	chr16	49151568	49151720	-	13.1
ID=chr16:-:gene:49151552:49161495;children=UL_207,UL_208;	UL_208	lincRNA	chr16	49151552	49161495	-	9944	6605	LAST	2	chr16	49151552	49157751	6200	50	0.806452	0.757002	47.7366	exonized	Kolobok-N2_DR	DNA/Kolobok	chr16	49154464	49154513	-	14.7
ID=chr16:-:gene:49151552:49161495;children=UL_207,UL_208;	UL_208	lincRNA	chr16	49151552	49161495	-	9944	6605	LAST	2	chr16	49151552	49157751	6200	70	1.12903	1.0598	47.7366	exonized	Kolobok-N2A_DR	DNA/Kolobok	chr16	49155186	49155255	+	13.9
ID=chr16:-:gene:49151552:49161495;children=UL_207,UL_208;	UL_208	lincRNA	chr16	49151552	49161495	-	9944	6605	LAST	2	chr16	49151552	49157751	6200	135	2.17742	2.04391	47.7366	exonized	HATN8_DR	DNA	chr16	49154292	49154426	+	12.7
ID=chr16:-:gene:49151552:49161495;children=UL_207,UL_208;	UL_208	lincRNA	chr16	49151552	49161495	-	9944	6605	LAST	2	chr16	49151552	49157751	6200	45	0.725806	0.681302	47.7366	exonized	HATN8_DR	DNA	chr16	49153542	49153586	+	12.7
ID=chr16:-:gene:49151552:49161495;children=UL_207,UL_208;	UL_208	lincRNA	chr16	49151552	49161495	-	9944	6605	LAST	2	chr16	49151552	49157751	6200	481	7.75806	7.28236	47.7366	exonized	DNA25TWA1_DR	DNA	chr16	49155613	49156093	+	14.4
ID=chr16:-:gene:49151552:49161495;children=UL_207,UL_208;	UL_208	lincRNA	chr16	49151552	49161495	-	9944	6605	LAST	2	chr16	49151552	49157751	6200	187	3.01613	2.83119	47.7366	exonized	DNA11TA1_DR	DNA/TcMar-Tc1	chr16	49156417	49156603	-	14.2
ID=chr16:-:gene:49151552:49161495;children=UL_207,UL_208;	UL_208	lincRNA	chr16	49151552	49161495	-	9944	6605	LAST	2	chr16	49151552	49157751	6200	445	7.17742	6.73732	47.7366	exonized	DNA-X-11_DR	DNA	chr16	49153776	49154220	+	13.3
ID=chr16:-:gene:49151552:49161495;children=UL_207,UL_208;	UL_208	lincRNA	chr16	49151552	49161495	-	9944	6605	LAST	2	chr16	49151552	49157751	6200	522	8.41935	7.9031	47.7366	exonized	DNA-TTAA-2_DR	DNA/PiggyBac?	chr16	49153587	49154108	-	12.8
ID=chr16:-:gene:49151552:49161495;children=UL_207,UL_208;	UL_208	lincRNA	chr16	49151552	49161495	-	9944	6605	LAST	2	chr16	49151552	49157751	6200	157	2.53226	2.37699	47.7366	exonized	DNA-8-34_DR	DNA/hAT-Tip100	chr16	49154602	49154758	+	13.8
ID=chr16:-:gene:49151552:49161495;children=UL_207,UL_208;	UL_208	lincRNA	chr16	49151552	49161495	-	9944	6605	LAST	2	chr16	49151552	49157751	6200	81	1.30645	1.22634	47.7366	exonized	DNA-2-7_DR	DNA/En-Spm?	chr16	49156800	49156880	-	20.3
ID=chr16:-:gene:49151552:49161495;children=UL_207,UL_208;	UL_208	lincRNA	chr16	49151552	49161495	-	9944	6605	LAST	2	chr16	49151552	49157751	6200	117	1.8871	1.77139	47.7366	exonized	ANGEL	DNA/hAT	chr16	49157161	49157277	+	17.6
ID=chr16:-:gene:49414877:49457540;children=UL_209;	UL_209	lincRNA	chr16	49414877	49457540	-	42664	1184	FIRST	1	chr16	49457333	49457540	208	77	37.0192	6.50338	6.50338	TSS	TDR12	DNA	chr16	49457464	49457700	-	10.6
ID=chr16:-:gene:49461762:49495118;children=Zv9_00038706;	Zv9_00038706	lincRNA	chr16	49461762	49495118	-	33357	5335	LAST	3	chr16	49461762	49466450	4689	921	19.6417	17.2634	24.0862	exonized	TDR2	DNA/TcMar-Tc1	chr16	49463821	49464741	+	8.1
ID=chr16:-:gene:49461762:49495118;children=Zv9_00038706;	Zv9_00038706	lincRNA	chr16	49461762	49495118	-	33357	5335	LAST	3	chr16	49461762	49466450	4689	222	4.73448	4.1612	24.0862	exonized	Kolobok-1_DR	DNA/Kolobok	chr16	49463093	49463314	+	16.7
ID=chr16:-:gene:49461762:49495118;children=Zv9_00038706;	Zv9_00038706	lincRNA	chr16	49461762	49495118	-	33357	5335	LAST	3	chr16	49461762	49466450	4689	142	3.02836	2.66167	24.0862	exonized	HE1_DR1	SINE/V	chr16	49462194	49462335	+	13.2
ID=chr16:-:gene:49675895:49706465;children=UL_210;	UL_210	lincRNA	chr16	49675895	49706465	-	30571	4758	FIRST	1	chr16	49706190	49706465	276	22	7.97101	0.462379	45.5443	TSS	DNA-8-3_DR	DNA	chr16	49706444	49706529	+	12.1
ID=chr16:-:gene:49675895:49706465;children=UL_210;	UL_210	lincRNA	chr16	49675895	49706465	-	30571	4758	LAST	11	chr16	49675895	49679400	3506	436	12.4358	9.16351	45.5443	exonized	TDR23	DNA	chr16	49678849	49679284	-	14
ID=chr16:-:gene:49675895:49706465;children=UL_210;	UL_210	lincRNA	chr16	49675895	49706465	-	30571	4758	LAST	11	chr16	49675895	49679400	3506	250	7.13063	5.25431	45.5443	exonized	TDR23	DNA	chr16	49678581	49678830	-	14
ID=chr16:-:gene:49675895:49706465;children=UL_210;	UL_210	lincRNA	chr16	49675895	49706465	-	30571	4758	LAST	11	chr16	49675895	49679400	3506	456	13.0063	9.58386	45.5443	exonized	TDR13	DNA	chr16	49677924	49678379	-	15.4
ID=chr16:-:gene:49675895:49706465;children=UL_210;	UL_210	lincRNA	chr16	49675895	49706465	-	30571	4758	LAST	11	chr16	49675895	49679400	3506	182	5.1911	3.82514	45.5443	exonized	TDR13	DNA	chr16	49677210	49677391	-	15.4
ID=chr16:-:gene:49675895:49706465;children=UL_210;	UL_210	lincRNA	chr16	49675895	49706465	-	30571	4758	LAST	11	chr16	49675895	49679400	3506	532	15.174	11.1812	45.5443	exonized	DNA25TWA1_DR	DNA	chr16	49677392	49677923	-	14.4
ID=chr16:-:gene:49675895:49706465;children=UL_210;	UL_210	lincRNA	chr16	49675895	49706465	-	30571	4758	LAST	11	chr16	49675895	49679400	3506	31	0.884199	0.651534	45.5443	exonized	DNA-8-9_DR	DNA/hAT-Ac?	chr16	49677111	49677141	+	18.1
ID=chr16:-:gene:49675895:49706465;children=UL_210;	UL_210	lincRNA	chr16	49675895	49706465	-	30571	4758	LAST	11	chr16	49675895	49679400	3506	28	0.798631	0.588483	45.5443	exonized	DNA-8-9_DR	DNA/hAT-Ac?	chr16	49676692	49676719	+	18.1
ID=chr16:-:gene:49675895:49706465;children=UL_210;	UL_210	lincRNA	chr16	49675895	49706465	-	30571	4758	LAST	11	chr16	49675895	49679400	3506	230	6.56018	4.83396	45.5443	exonized	DNA-8-24_DR	DNA/hAT?	chr16	49676050	49676279	+	17.2
ID=chr16:-:gene:54498984:54501006;children=Zv9_00038770;	Zv9_00038770	lincRNA	chr16	54498984	54501006	-	2023	1476	LAST	2	chr16	54498984	54500185	1202	214	17.8037	14.4986	14.4986	exonized	ANGEL	DNA/hAT	chr16	54499018	54499231	-	17.6
ID=chr16:-:gene:5630398:5640279;children=Zv9_00037691;	Zv9_00037691	lincRNA	chr16	5630398	5640279	-	9882	292	LAST	2	chr16	5630398	5630599	202	12	5.94059	4.10959	4.10959	PolyA	Kolobok-N6_DR	DNA/Kolobok?	chr16	5630321	5630409	+	11.9
ID=chr16:-:gene:57116318:57118957;children=UL_214;	UL_214	lincRNA	chr16	57116318	57118957	-	2640	2640	SINGLE	1	chr16	57116318	57118957	2640	118	4.4697	4.4697	54.8485	exonized	TE-X-4_DR	Unknown	chr16	57118246	57118363	+	17.1
ID=chr16:-:gene:57116318:57118957;children=UL_214;	UL_214	lincRNA	chr16	57116318	57118957	-	2640	2640	SINGLE	1	chr16	57116318	57118957	2640	495	18.75	18.75	54.8485	exonized	TDR18	DNA/hAT-Charlie	chr16	57118265	57118759	+	10.6
ID=chr16:-:gene:57116318:57118957;children=UL_214;	UL_214	lincRNA	chr16	57116318	57118957	-	2640	2640	SINGLE	1	chr16	57116318	57118957	2640	245	9.2803	9.2803	54.8485	exonized	TDR18	DNA/hAT-Charlie	chr16	57116910	57117154	-	10.6
ID=chr16:-:gene:57116318:57118957;children=UL_214;	UL_214	lincRNA	chr16	57116318	57118957	-	2640	2640	SINGLE	1	chr16	57116318	57118957	2640	17	0.643939	0.643939	54.8485	TSS	LOOPERN6_DR	DNA/PiggyBac	chr16	57118941	57119065	-	14.3
ID=chr16:-:gene:57116318:57118957;children=UL_214;	UL_214	lincRNA	chr16	57116318	57118957	-	2640	2640	SINGLE	1	chr16	57116318	57118957	2640	54	2.04545	2.04545	54.8485	exonized	LOOPERN6_DR	DNA/PiggyBac	chr16	57118895	57118948	-	14.3
ID=chr16:-:gene:57116318:57118957;children=UL_214;	UL_214	lincRNA	chr16	57116318	57118957	-	2640	2640	SINGLE	1	chr16	57116318	57118957	2640	105	3.97727	3.97727	54.8485	exonized	Helitron-N3_DR	DNA/Helitron	chr16	57117151	57117255	-	14.5
ID=chr16:-:gene:57116318:57118957;children=UL_214;	UL_214	lincRNA	chr16	57116318	57118957	-	2640	2640	SINGLE	1	chr16	57116318	57118957	2640	93	3.52273	3.52273	54.8485	exonized	HATN12_DR	DNA/hAT-Ac	chr16	57118152	57118244	+	16.5
ID=chr16:-:gene:57116318:57118957;children=UL_214;	UL_214	lincRNA	chr16	57116318	57118957	-	2640	2640	SINGLE	1	chr16	57116318	57118957	2640	51	1.93182	1.93182	54.8485	exonized	HATN12_DR	DNA/hAT-Ac	chr16	57117739	57117789	+	16.5
ID=chr16:-:gene:57116318:57118957;children=UL_214;	UL_214	lincRNA	chr16	57116318	57118957	-	2640	2640	SINGLE	1	chr16	57116318	57118957	2640	14	0.530303	0.530303	54.8485	exonized	ENSPM-6_DR	DNA/En-Spm	chr16	57117256	57117269	-	17.5
ID=chr16:-:gene:57116318:57118957;children=UL_214;	UL_214	lincRNA	chr16	57116318	57118957	-	2640	2640	SINGLE	1	chr16	57116318	57118957	2640	112	4.24242	4.24242	54.8485	exonized	DNA-TA-2_DR	DNA	chr16	57117319	57117430	-	13.4
ID=chr16:-:gene:57116318:57118957;children=UL_214;	UL_214	lincRNA	chr16	57116318	57118957	-	2640	2640	SINGLE	1	chr16	57116318	57118957	2640	144	5.45455	5.45455	54.8485	exonized	DIRS-4_DR	LTR/Ngaro	chr16	57117917	57118060	+	18.4
ID=chr16:-:gene:7747412:7770082;children=Zv9_00037731,Zv9_00037732;	Zv9_00037731	lincRNA	chr16	7747412	7770082	-	22671	1024	FIRST	1	chr16	7769940	7770082	143	143	100	13.9648	15.625	TSS_SPL	Gypsy-26-LTR_DR	LTR/Gypsy	chr16	7769411	7770150	-	8.8
ID=chr16:-:gene:7747412:7770082;children=Zv9_00037731,Zv9_00037732;	Zv9_00037731	lincRNA	chr16	7747412	7770082	-	22671	1024	LAST	4	chr16	7747412	7747967	556	17	3.05755	1.66016	15.625	PolyA	DNA-2-30_DR	DNA	chr16	7747018	7747428	-	14
ID=chr16:-:gene:7747412:7770082;children=Zv9_00037731,Zv9_00037732;	Zv9_00037732	lincRNA	chr16	7747412	7770082	-	22671	906	FIRST	1	chr16	7769940	7770082	143	143	100	15.7837	17.66	TSS_SPL	Gypsy-26-LTR_DR	LTR/Gypsy	chr16	7769411	7770150	-	8.8
ID=chr16:-:gene:7747412:7770082;children=Zv9_00037731,Zv9_00037732;	Zv9_00037732	lincRNA	chr16	7747412	7770082	-	22671	906	LAST	4	chr16	7747412	7747967	556	17	3.05755	1.87638	17.66	PolyA	DNA-2-30_DR	DNA	chr16	7747018	7747428	-	14
ID=chr16:-:gene:8364901:8377742;children=UL_167;	UL_167	lincRNA	chr16	8364901	8377742	-	12842	3424	FIRST	1	chr16	8377417	8377742	326	97	29.7546	2.83294	14.3692	TSS	HE1_DR1	SINE/V	chr16	8377646	8377767	+	13.2
ID=chr16:-:gene:8364901:8377742;children=UL_167;	UL_167	lincRNA	chr16	8364901	8377742	-	12842	3424	LAST	9	chr16	8364901	8366449	1549	395	25.5003	11.5362	14.3692	exonized	TE-X-2_DR	Unknown	chr16	8365031	8365425	+	11
ID=chr16:-:gene:863576:864773;children=Zv9_00037640;	Zv9_00037640	lincRNA	chr16	863576	864773	-	1198	574	LAST	2	chr16	863576	863699	124	124	100	21.6028	21.6028	PolyA_SPL	DNA-X-4_DR	DNA	chr16	863491	863767	-	11.4
ID=chr16:+:gene:1217944:1232881;children=Zv9_00036398,Zv9_00036399;	Zv9_00036399	lincRNA	chr16	1217949	1232881	+	14933	1213	LAST	2	chr16	1231811	1232881	1071	187	17.4603	15.4163	42.704	exonized	TDR23	DNA	chr16	1232181	1232367	+	14
ID=chr16:+:gene:1217944:1232881;children=Zv9_00036398,Zv9_00036399;	Zv9_00036399	lincRNA	chr16	1217949	1232881	+	14933	1213	LAST	2	chr16	1231811	1232881	1071	331	30.9057	27.2877	42.704	exonized	DNAX-1_DR	DNA	chr16	1232395	1232725	+	16.9
ID=chr16:+:gene:12329581:12333337;children=UL_169;	UL_169	lincRNA	chr16	12329581	12333337	+	3757	3757	SINGLE	1	chr16	12329581	12333337	3757	92	2.44876	2.44876	71.3069	exonized	Tc1N1_DR	DNA/En-Spm?	chr16	12332661	12332752	-	13.9
ID=chr16:+:gene:12329581:12333337;children=UL_169;	UL_169	lincRNA	chr16	12329581	12333337	+	3757	3757	SINGLE	1	chr16	12329581	12333337	3757	459	12.2172	12.2172	71.3069	exonized	Tc1N1_DR	DNA/En-Spm?	chr16	12329773	12330231	+	13.9
ID=chr16:+:gene:12329581:12333337;children=UL_169;	UL_169	lincRNA	chr16	12329581	12333337	+	3757	3757	SINGLE	1	chr16	12329581	12333337	3757	95	2.52861	2.52861	71.3069	exonized	TDR3	DNA/hAT-Charlie	chr16	12330796	12330890	+	16.3
ID=chr16:+:gene:12329581:12333337;children=UL_169;	UL_169	lincRNA	chr16	12329581	12333337	+	3757	3757	SINGLE	1	chr16	12329581	12333337	3757	117	3.11419	3.11419	71.3069	exonized	TDR19	DNA/hAT	chr16	12330759	12330875	-	19.4
ID=chr16:+:gene:12329581:12333337;children=UL_169;	UL_169	lincRNA	chr16	12329581	12333337	+	3757	3757	SINGLE	1	chr16	12329581	12333337	3757	203	5.40325	5.40325	71.3069	exonized	TDR19	DNA/hAT	chr16	12330240	12330442	-	19.4
ID=chr16:+:gene:12329581:12333337;children=UL_169;	UL_169	lincRNA	chr16	12329581	12333337	+	3757	3757	SINGLE	1	chr16	12329581	12333337	3757	422	11.2324	11.2324	71.3069	exonized	TDR18	DNA	chr16	12332811	12333232	-	10.6
ID=chr16:+:gene:12329581:12333337;children=UL_169;	UL_169	lincRNA	chr16	12329581	12333337	+	3757	3757	SINGLE	1	chr16	12329581	12333337	3757	290	7.71892	7.71892	71.3069	exonized	Harbinger-N10_DR	DNA/Harbinger	chr16	12331106	12331395	-	13.3
ID=chr16:+:gene:12329581:12333337;children=UL_169;	UL_169	lincRNA	chr16	12329581	12333337	+	3757	3757	SINGLE	1	chr16	12329581	12333337	3757	575	15.3048	15.3048	71.3069	exonized	HATN7_DR	DNA/hAT	chr16	12331567	12332141	+	12.7
ID=chr16:+:gene:12329581:12333337;children=UL_169;	UL_169	lincRNA	chr16	12329581	12333337	+	3757	3757	SINGLE	1	chr16	12329581	12333337	3757	321	8.54405	8.54405	71.3069	exonized	EnSpm-6N1_DR	DNA/En-Spm	chr16	12332901	12333221	-	16.4
ID=chr16:+:gene:12329581:12333337;children=UL_169;	UL_169	lincRNA	chr16	12329581	12333337	+	3757	3757	SINGLE	1	chr16	12329581	12333337	3757	105	2.79478	2.79478	71.3069	exonized	DNA-6-N5_DR	DNA	chr16	12330776	12330880	+	17.4
ID=chr16:+:gene:18642210:18652941;children=UL_174;	UL_174	lincRNA	chr16	18642210	18652941	+	10732	5711	FIRST	1	chr16	18642210	18642658	449	116	25.8352	2.03117	39.2401	exonized	RTEX-1_DR	LINE/RTE-BovB	chr16	18642212	18642327	+	13.8
ID=chr16:+:gene:18642210:18652941;children=UL_174;	UL_174	lincRNA	chr16	18642210	18652941	+	10732	5711	LAST	3	chr16	18647774	18652941	5168	779	15.0735	13.6403	39.2401	exonized	Looper-N7_DR	DNA/PiggyBac	chr16	18649437	18650215	+	12.4
ID=chr16:+:gene:18642210:18652941;children=UL_174;	UL_174	lincRNA	chr16	18642210	18652941	+	10732	5711	LAST	3	chr16	18647774	18652941	5168	69	1.33514	1.20819	39.2401	exonized	Looper-N7_DR	DNA/PiggyBac	chr16	18649358	18649426	+	12.4
ID=chr16:+:gene:18642210:18652941;children=UL_174;	UL_174	lincRNA	chr16	18642210	18652941	+	10732	5711	LAST	3	chr16	18647774	18652941	5168	192	3.71517	3.36193	39.2401	exonized	HarbingerN6_DR	DNA/Harbinger	chr16	18650313	18650504	-	14.9
ID=chr16:+:gene:18642210:18652941;children=UL_174;	UL_174	lincRNA	chr16	18642210	18652941	+	10732	5711	LAST	3	chr16	18647774	18652941	5168	186	3.59907	3.25687	39.2401	exonized	Harbinger-N10_DR	DNA/Harbinger	chr16	18650536	18650721	-	13.3
ID=chr16:+:gene:18642210:18652941;children=UL_174;	UL_174	lincRNA	chr16	18642210	18652941	+	10732	5711	LAST	3	chr16	18647774	18652941	5168	238	4.60526	4.1674	39.2401	exonized	Gypsy44-LTR_DR	LTR/Gypsy	chr16	18648997	18649234	-	15.4
ID=chr16:+:gene:18642210:18652941;children=UL_174;	UL_174	lincRNA	chr16	18642210	18652941	+	10732	5711	LAST	3	chr16	18647774	18652941	5168	191	3.69582	3.34442	39.2401	exonized	EnSpm-N4_DR	DNA/En-Spm?	chr16	18651433	18651623	+	14.2
ID=chr16:+:gene:18642210:18652941;children=UL_174;	UL_174	lincRNA	chr16	18642210	18652941	+	10732	5711	LAST	3	chr16	18647774	18652941	5168	411	7.95279	7.19664	39.2401	exonized	DNA-TTAA0-1_DR	DNA	chr16	18652507	18652917	-	7.4
ID=chr16:+:gene:18642210:18652941;children=UL_174;	UL_174	lincRNA	chr16	18642210	18652941	+	10732	5711	LAST	3	chr16	18647774	18652941	5168	59	1.14164	1.03309	39.2401	exonized	DNA-TTAA0-1_DR	DNA	chr16	18652464	18652522	-	7.4
ID=chr16:+:gene:24213545:24288937;children=UL_180;	UL_180	lincRNA	chr16	24213545	24288937	+	75393	1091	FIRST	1	chr16	24213545	24213825	281	79	28.1139	7.24106	7.24106	exonized	DNA-8-4_DR	DNA/hAT	chr16	24213696	24213774	+	12.2
ID=chr16:+:gene:26224547:26230391;children=UL_181;	UL_181	lincRNA	chr16	26224547	26230391	+	5845	5845	SINGLE	1	chr16	26224547	26230391	5845	194	3.31908	3.31908	48.2464	exonized	TDR3	DNA/hAT-Charlie	chr16	26225807	26226000	+	16.3
ID=chr16:+:gene:26224547:26230391;children=UL_181;	UL_181	lincRNA	chr16	26224547	26230391	+	5845	5845	SINGLE	1	chr16	26224547	26230391	5845	38	0.650128	0.650128	48.2464	exonized	TDR23	DNA	chr16	26226001	26226038	+	14
ID=chr16:+:gene:26224547:26230391;children=UL_181;	UL_181	lincRNA	chr16	26224547	26230391	+	5845	5845	SINGLE	1	chr16	26224547	26230391	5845	759	12.9855	12.9855	48.2464	exonized	TDR23	DNA	chr16	26225048	26225806	+	14
ID=chr16:+:gene:26224547:26230391;children=UL_181;	UL_181	lincRNA	chr16	26224547	26230391	+	5845	5845	SINGLE	1	chr16	26224547	26230391	5845	233	3.98631	3.98631	48.2464	exonized	TDR11	DNA	chr16	26227026	26227258	-	8.5
ID=chr16:+:gene:26224547:26230391;children=UL_181;	UL_181	lincRNA	chr16	26224547	26230391	+	5845	5845	SINGLE	1	chr16	26224547	26230391	5845	481	8.22926	8.22926	48.2464	exonized	SINE3-1a	SINE/5S	chr16	26228016	26228496	+	9.92
ID=chr16:+:gene:26224547:26230391;children=UL_181;	UL_181	lincRNA	chr16	26224547	26230391	+	5845	5845	SINGLE	1	chr16	26224547	26230391	5845	136	2.32678	2.32678	48.2464	exonized	ENSPM-6_DR	DNA/En-Spm	chr16	26229586	26229721	-	17.5
ID=chr16:+:gene:26224547:26230391;children=UL_181;	UL_181	lincRNA	chr16	26224547	26230391	+	5845	5845	SINGLE	1	chr16	26224547	26230391	5845	39	0.667237	0.667237	48.2464	exonized	DNA-8-26_DR	DNA/hAT-Tip100?	chr16	26226681	26226719	-	19
ID=chr16:+:gene:26224547:26230391;children=UL_181;	UL_181	lincRNA	chr16	26224547	26230391	+	5845	5845	SINGLE	1	chr16	26224547	26230391	5845	364	6.22754	6.22754	48.2464	exonized	DNA-1-10_DR	DNA	chr16	26229014	26229377	+	13.6
ID=chr16:+:gene:26224547:26230391;children=UL_181;	UL_181	lincRNA	chr16	26224547	26230391	+	5845	5845	SINGLE	1	chr16	26224547	26230391	5845	145	2.48075	2.48075	48.2464	exonized	DNA-1-10_DR	DNA	chr16	26228843	26228987	+	13.6
ID=chr16:+:gene:26224547:26230391;children=UL_181;	UL_181	lincRNA	chr16	26224547	26230391	+	5845	5845	SINGLE	1	chr16	26224547	26230391	5845	160	2.73738	2.73738	48.2464	exonized	ANGEL	DNA/hAT	chr16	26229605	26229764	-	17.6
ID=chr16:+:gene:26224547:26230391;children=UL_181;	UL_181	lincRNA	chr16	26224547	26230391	+	5845	5845	SINGLE	1	chr16	26224547	26230391	5845	143	2.44654	2.44654	48.2464	exonized	ANGEL	DNA/hAT	chr16	26224849	26224991	+	17.6
ID=chr16:+:gene:26224547:26230391;children=UL_181;	UL_181	lincRNA	chr16	26224547	26230391	+	5845	5845	SINGLE	1	chr16	26224547	26230391	5845	128	2.18991	2.18991	48.2464	exonized	ANGEL	DNA/hAT	chr16	26224830	26224957	-	17.6
ID=chr16:+:gene:27376731:27401630;children=UL_184;	UL_184	lincRNA	chr16	27376731	27401630	+	24900	7291	LAST	10	chr16	27400165	27401630	1466	137	9.34516	1.87903	1.87903	exonized	ANGEL	DNA/hAT	chr16	27401418	27401554	-	17.6
ID=chr16:+:gene:34275386:34284851;children=Zv9_00037124;	Zv9_00037124	lincRNA	chr16	34275386	34284851	+	9466	265	FIRST	1	chr16	34275386	34275485	100	100	100	37.7358	37.7358	TSS_SPL	LOOPERN4_DR	DNA/PiggyBac	chr16	34275197	34275616	-	15.4
ID=chr16:+:gene:34619324:34680041;children=Zv9_00037143,Zv9_00037144;	Zv9_00037143	lincRNA	chr16	34619324	34680041	+	60718	2922	LAST	4	chr16	34677974	34680041	2068	230	11.1219	7.87132	13.0048	exonized	Kolobok-N2_DR	DNA/Kolobok	chr16	34678911	34679140	-	14.7
ID=chr16:+:gene:34619324:34680041;children=Zv9_00037143,Zv9_00037144;	Zv9_00037143	lincRNA	chr16	34619324	34680041	+	60718	2922	LAST	4	chr16	34677974	34680041	2068	37	1.78917	1.26626	13.0048	PolyA	DNA-6-N1_DR	DNA	chr16	34680005	34680203	+	16.2
ID=chr16:+:gene:34619324:34680041;children=Zv9_00037143,Zv9_00037144;	Zv9_00037143	lincRNA	chr16	34619324	34680041	+	60718	2922	LAST	4	chr16	34677974	34680041	2068	113	5.46422	3.86721	13.0048	exonized	DNA-2-8_DR	DNA/En-Spm	chr16	34679501	34679613	-	11.5
ID=chr16:+:gene:37020409:37043315;children=UL_187,UL_188,UL_189;	UL_187	lincRNA	chr16	37020409	37042990	+	22582	4738	LAST	3	chr16	37038635	37042990	4356	156	3.58127	3.29253	41.3255	exonized	HE1_DR1	SINE/V	chr16	37040310	37040465	-	13.2
ID=chr16:+:gene:37020409:37043315;children=UL_187,UL_188,UL_189;	UL_187	lincRNA	chr16	37020409	37042990	+	22582	4738	LAST	3	chr16	37038635	37042990	4356	236	5.41781	4.981	41.3255	exonized	HATN8_DR	DNA	chr16	37040924	37041159	-	12.7
ID=chr16:+:gene:37020409:37043315;children=UL_187,UL_188,UL_189;	UL_187	lincRNA	chr16	37020409	37042990	+	22582	4738	LAST	3	chr16	37038635	37042990	4356	377	8.65473	7.95694	41.3255	exonized	HATN1_DR	DNA/hAT	chr16	37041565	37041941	+	12.1
ID=chr16:+:gene:37020409:37043315;children=UL_187,UL_188,UL_189;	UL_187	lincRNA	chr16	37020409	37042990	+	22582	4738	LAST	3	chr16	37038635	37042990	4356	940	21.5794	19.8396	41.3255	exonized	ENSPM-6_DR	DNA/En-Spm	chr16	37039371	37040310	+	17.5
ID=chr16:+:gene:37020409:37043315;children=UL_187,UL_188,UL_189;	UL_187	lincRNA	chr16	37020409	37042990	+	22582	4738	LAST	3	chr16	37038635	37042990	4356	187	4.29293	3.94681	41.3255	exonized	DNA-1-7_DR	DNA/Harbinger	chr16	37040739	37040925	-	14.2
ID=chr16:+:gene:37020409:37043315;children=UL_187,UL_188,UL_189;	UL_187	lincRNA	chr16	37020409	37042990	+	22582	4738	LAST	3	chr16	37038635	37042990	4356	62	1.42332	1.30857	41.3255	exonized	DNA-1-7_DR	DNA/Harbinger	chr16	37040683	37040744	+	14.2
ID=chr16:+:gene:37020409:37043315;children=UL_187,UL_188,UL_189;	UL_188	lincRNA	chr16	37020409	37043035	+	22627	4783	LAST	3	chr16	37038635	37043035	4401	156	3.54465	3.26155	40.9367	exonized	HE1_DR1	SINE/V	chr16	37040310	37040465	-	13.2
ID=chr16:+:gene:37020409:37043315;children=UL_187,UL_188,UL_189;	UL_188	lincRNA	chr16	37020409	37043035	+	22627	4783	LAST	3	chr16	37038635	37043035	4401	236	5.36242	4.93414	40.9367	exonized	HATN8_DR	DNA	chr16	37040924	37041159	-	12.7
ID=chr16:+:gene:37020409:37043315;children=UL_187,UL_188,UL_189;	UL_188	lincRNA	chr16	37020409	37043035	+	22627	4783	LAST	3	chr16	37038635	37043035	4401	377	8.56623	7.88208	40.9367	exonized	HATN1_DR	DNA/hAT	chr16	37041565	37041941	+	12.1
ID=chr16:+:gene:37020409:37043315;children=UL_187,UL_188,UL_189;	UL_188	lincRNA	chr16	37020409	37043035	+	22627	4783	LAST	3	chr16	37038635	37043035	4401	940	21.3588	19.6529	40.9367	exonized	ENSPM-6_DR	DNA/En-Spm	chr16	37039371	37040310	+	17.5
ID=chr16:+:gene:37020409:37043315;children=UL_187,UL_188,UL_189;	UL_188	lincRNA	chr16	37020409	37043035	+	22627	4783	LAST	3	chr16	37038635	37043035	4401	187	4.24903	3.90968	40.9367	exonized	DNA-1-7_DR	DNA/Harbinger	chr16	37040739	37040925	-	14.2
ID=chr16:+:gene:37020409:37043315;children=UL_187,UL_188,UL_189;	UL_188	lincRNA	chr16	37020409	37043035	+	22627	4783	LAST	3	chr16	37038635	37043035	4401	62	1.40877	1.29626	40.9367	exonized	DNA-1-7_DR	DNA/Harbinger	chr16	37040683	37040744	+	14.2
ID=chr16:+:gene:37020409:37043315;children=UL_187,UL_188,UL_189;	UL_189	lincRNA	chr16	37020409	37043315	+	22907	5063	LAST	3	chr16	37038635	37043315	4681	156	3.33262	3.08118	38.6727	exonized	HE1_DR1	SINE/V	chr16	37040310	37040465	-	13.2
ID=chr16:+:gene:37020409:37043315;children=UL_187,UL_188,UL_189;	UL_189	lincRNA	chr16	37020409	37043315	+	22907	5063	LAST	3	chr16	37038635	37043315	4681	236	5.04166	4.66127	38.6727	exonized	HATN8_DR	DNA	chr16	37040924	37041159	-	12.7
ID=chr16:+:gene:37020409:37043315;children=UL_187,UL_188,UL_189;	UL_189	lincRNA	chr16	37020409	37043315	+	22907	5063	LAST	3	chr16	37038635	37043315	4681	377	8.05383	7.44618	38.6727	exonized	HATN1_DR	DNA/hAT	chr16	37041565	37041941	+	12.1
ID=chr16:+:gene:37020409:37043315;children=UL_187,UL_188,UL_189;	UL_189	lincRNA	chr16	37020409	37043315	+	22907	5063	LAST	3	chr16	37038635	37043315	4681	940	20.0812	18.5661	38.6727	exonized	ENSPM-6_DR	DNA/En-Spm	chr16	37039371	37040310	+	17.5
ID=chr16:+:gene:37020409:37043315;children=UL_187,UL_188,UL_189;	UL_189	lincRNA	chr16	37020409	37043315	+	22907	5063	LAST	3	chr16	37038635	37043315	4681	187	3.99487	3.69346	38.6727	exonized	DNA-1-7_DR	DNA/Harbinger	chr16	37040739	37040925	-	14.2
ID=chr16:+:gene:37020409:37043315;children=UL_187,UL_188,UL_189;	UL_189	lincRNA	chr16	37020409	37043315	+	22907	5063	LAST	3	chr16	37038635	37043315	4681	62	1.3245	1.22457	38.6727	exonized	DNA-1-7_DR	DNA/Harbinger	chr16	37040683	37040744	+	14.2
ID=chr16:+:gene:42525190:42568375;children=Zv9_00037309,Zv9_00037307,Zv9_00037308;	Zv9_00037308	lincRNA	chr16	42526242	42559396	+	33155	1885	FIRST	1	chr16	42526242	42526438	197	197	100	10.4509	14.695	TSS_SPL	MuDR-N1_DR	DNA/MuDR	chr16	42526241	42526735	+	10.9
ID=chr16:+:gene:42525190:42568375;children=Zv9_00037309,Zv9_00037307,Zv9_00037308;	Zv9_00037308	lincRNA	chr16	42526242	42559396	+	33155	1885	LAST	2	chr16	42557709	42559396	1688	80	4.73934	4.24403	14.695	PolyA	TDR24	DNA	chr16	42559317	42559718	+	15.1
ID=chr16:+:gene:42525190:42568375;children=Zv9_00037309,Zv9_00037307,Zv9_00037308;	Zv9_00037309	lincRNA	chr16	42526243	42568375	+	42133	1143	FIRST	1	chr16	42526243	42526438	196	196	100	17.1479	23.622	TSS_SPL	MuDR-N1_DR	DNA/MuDR	chr16	42526241	42526735	+	10.9
ID=chr16:+:gene:42525190:42568375;children=Zv9_00037309,Zv9_00037307,Zv9_00037308;	Zv9_00037309	lincRNA	chr16	42526243	42568375	+	42133	1143	LAST	3	chr16	42567669	42568375	707	74	10.4668	6.47419	23.622	exonized	hAT-2n1_DR	DNA/hAT-Charlie	chr16	42567991	42568064	+	13.2
ID=chr16:+:gene:42525190:42568377;children=Zv9_00037309,Zv9_00037310,Zv9_00037307,Zv9_00037308;	Zv9_00037307	lincRNA	chr16	42525190	42568375	+	43186	1419	MIDDLE	2	chr16	42526246	42526438	193	193	100	13.6011	18.8161	Both_SPL	MuDR-N1_DR	DNA/MuDR	chr16	42526241	42526735	+	10.9
ID=chr16:+:gene:42525190:42568377;children=Zv9_00037309,Zv9_00037310,Zv9_00037307,Zv9_00037308;	Zv9_00037307	lincRNA	chr16	42525190	42568375	+	43186	1419	LAST	4	chr16	42567669	42568375	707	74	10.4668	5.21494	18.8161	exonized	hAT-2n1_DR	DNA/hAT-Charlie	chr16	42567991	42568064	+	13.2
ID=chr16:+:gene:42525190:42568377;children=Zv9_00037309,Zv9_00037310,Zv9_00037307;	Zv9_00037310	lincRNA	chr16	42567269	42568377	+	1109	946	LAST	2	chr16	42567669	42568377	709	74	10.4372	7.82241	7.82241	exonized	hAT-2n1_DR	DNA/hAT-Charlie	chr16	42567991	42568064	+	13.2
ID=chr16:+:gene:44234971:44242471;children=Zv9_00037346;	Zv9_00037346	lincRNA	chr16	44234971	44242471	+	7501	302	MIDDLE	2	chr16	44237293	44237449	157	157	100	51.9868	51.9868	Both_SPL	CR1-11_DR	LINE/L2	chr16	44237091	44237518	-	11.9
ID=chr16:+:gene:459488:461852;children=Zv9_00036392;	Zv9_00036392	lincRNA	chr16	459488	461852	+	2365	2282	FIRST	1	chr16	459488	459704	217	73	33.6406	3.19895	13.6722	TSS	DNA9NNN1_DR	DNA	chr16	459409	459560	+	13.9
ID=chr16:+:gene:459488:461852;children=Zv9_00036392;	Zv9_00036392	lincRNA	chr16	459488	461852	+	2365	2282	LAST	2	chr16	459788	461852	2065	239	11.5738	10.4733	13.6722	exonized	DNA-3-4_DR	DNA/Harbinger	chr16	461513	461751	-	12.9
ID=chr16:+:gene:52002402:52009728;children=Zv9_00037486;	Zv9_00037486	lincRNA	chr16	52002402	52009728	+	7327	2123	LAST	4	chr16	52008061	52009728	1668	249	14.9281	11.7287	18.9826	exonized	TDR23	DNA	chr16	52008583	52008831	+	14
ID=chr16:+:gene:52002402:52009728;children=Zv9_00037486;	Zv9_00037486	lincRNA	chr16	52002402	52009728	+	7327	2123	LAST	4	chr16	52008061	52009728	1668	154	9.23261	7.25389	18.9826	exonized	DNA25TWA1_DR	DNA	chr16	52008832	52008985	+	14.4
ID=chr17:-:gene:26823725:26827449;children=Zv9_00040622;	Zv9_00040622	lincRNA	chr17	26823725	26827449	-	3725	1701	FIRST	1	chr17	26826277	26827449	1173	111	9.46292	6.52557	21.9283	exonized	TDR3	DNA/hAT-Charlie	chr17	26827077	26827187	-	16.3
ID=chr17:-:gene:26823725:26827449;children=Zv9_00040622;	Zv9_00040622	lincRNA	chr17	26823725	26827449	-	3725	1701	FIRST	1	chr17	26826277	26827449	1173	262	22.3359	15.4027	21.9283	TSS	DNA13TA1_DR	DNA/TcMar-Tc1	chr17	26827188	26827462	+	15.4
ID=chr17:-:gene:34873909:34972888;children=Zv9_00040802;	Zv9_00040802	lincRNA	chr17	34873909	34972888	-	98980	766	LAST	4	chr17	34873909	34874434	526	201	38.2129	26.2402	41.2533	SPL	TDR13	DNA	chr17	34874234	34874839	+	15.4
ID=chr17:-:gene:34873909:34972888;children=Zv9_00040802;	Zv9_00040802	lincRNA	chr17	34873909	34972888	-	98980	766	LAST	4	chr17	34873909	34874434	526	89	16.9202	11.6188	41.2533	exonized	HarbingerN6_DR	DNA/Harbinger	chr17	34874062	34874150	+	14.9
ID=chr17:-:gene:34873909:34972888;children=Zv9_00040802;	Zv9_00040802	lincRNA	chr17	34873909	34972888	-	98980	766	LAST	4	chr17	34873909	34874434	526	15	2.85171	1.95822	41.2533	PolyA	HE1_DR1	SINE/V	chr17	34873735	34873923	-	13.2
ID=chr17:-:gene:34873909:34972888;children=Zv9_00040802;	Zv9_00040802	lincRNA	chr17	34873909	34972888	-	98980	766	LAST	4	chr17	34873909	34874434	526	11	2.09125	1.43603	41.2533	exonized	DNA-8-32_DR	DNA/hAT	chr17	34873924	34873934	+	15.4
ID=chr17:-:gene:44050996:44057439;children=UL_236;	UL_236	lincRNA	chr17	44050996	44057439	-	6444	3153	FIRST	1	chr17	44057353	44057439	87	56	64.3678	1.77609	43.2921	TSS	I-1_DR	LINE/I	chr17	44057384	44057463	-	21
ID=chr17:-:gene:44050996:44057439;children=UL_236;	UL_236	lincRNA	chr17	44050996	44057439	-	6444	3153	LAST	4	chr17	44050996	44053918	2923	534	18.2689	16.9363	43.2921	exonized	Tc1-5_DR	DNA/TcMar-Tc1	chr17	44053234	44053767	-	11.9
ID=chr17:-:gene:44050996:44057439;children=UL_236;	UL_236	lincRNA	chr17	44050996	44057439	-	6444	3153	LAST	4	chr17	44050996	44053918	2923	58	1.98426	1.83952	43.2921	exonized	Tc1-5_DR	DNA/TcMar-Tc1	chr17	44052015	44052072	-	11.9
ID=chr17:-:gene:44050996:44057439;children=UL_236;	UL_236	lincRNA	chr17	44050996	44057439	-	6444	3153	LAST	4	chr17	44050996	44053918	2923	184	6.2949	5.83571	43.2921	exonized	TDR3	DNA/hAT-Charlie	chr17	44051803	44051986	-	16.3
ID=chr17:-:gene:44050996:44057439;children=UL_236;	UL_236	lincRNA	chr17	44050996	44057439	-	6444	3153	LAST	4	chr17	44050996	44053918	2923	413	14.1293	13.0986	43.2921	exonized	HarbingerN5_DR	DNA/Harbinger	chr17	44051364	44051776	+	11.6
ID=chr17:-:gene:44050996:44057439;children=UL_236;	UL_236	lincRNA	chr17	44050996	44057439	-	6444	3153	LAST	4	chr17	44050996	44053918	2923	120	4.10537	3.8059	43.2921	exonized	DNA11TA1_DR	DNA/TcMar-Tc1	chr17	44052127	44052246	+	14.2
ID=chr17:+:gene:14676346:14677617;children=Zv9_00039192;	Zv9_00039192	lincRNA	chr17	14676346	14677617	+	1272	214	FIRST	1	chr17	14676346	14676369	24	24	100	11.215	11.215	TSS_SPL	DNA25TWA1_DR	DNA	chr17	14676107	14676395	-	14.4
ID=chr17:+:gene:14870498:14871618;children=UL_220;	UL_220	lincRNA	chr17	14870498	14871618	+	1121	1121	SINGLE	1	chr17	14870498	14871618	1121	175	15.6111	15.6111	27.7431	exonized	ERV1-N1-I_DR-int	LTR/ERV1	chr17	14871168	14871342	+	17.1
ID=chr17:+:gene:14870498:14871618;children=UL_220;	UL_220	lincRNA	chr17	14870498	14871618	+	1121	1121	SINGLE	1	chr17	14870498	14871618	1121	136	12.132	12.132	27.7431	exonized	DNA-8-14_DR	DNA/hAT-Charlie	chr17	14871208	14871343	-	11.4
ID=chr17:+:gene:20003971:20016164;children=UL_222;	UL_222	lincRNA	chr17	20003971	20016164	+	12194	3385	LAST	6	chr17	20013741	20016164	2424	961	39.6452	28.39	28.39	exonized	TC1DR3	DNA/TcMar-Tc1	chr17	20014810	20015770	+	10.4
ID=chr17:+:gene:2208928:2210522;children=UL_216;	UL_216	lincRNA	chr17	2208928	2210522	+	1595	1595	SINGLE	1	chr17	2208928	2210522	1595	174	10.9091	10.9091	17.3041	exonized	DNA-TA-2_DR	DNA	chr17	2209923	2210096	-	13.4
ID=chr17:+:gene:2208928:2210522;children=UL_216;	UL_216	lincRNA	chr17	2208928	2210522	+	1595	1595	SINGLE	1	chr17	2208928	2210522	1595	102	6.39498	6.39498	17.3041	exonized	ANGEL	DNA/hAT	chr17	2209688	2209789	-	17.6
ID=chr17:+:gene:24451389:24460360;children=UL_225,UL_224,UL_226;	UL_224	lincRNA	chr17	24451389	24459380	+	7992	4306	LAST	8	chr17	24456263	24459380	3118	188	6.02951	4.366	41.0822	exonized	hAT-N66B_DR	DNA/hAT-Charlie	chr17	24456734	24456921	+	10.7
ID=chr17:+:gene:24451389:24460360;children=UL_225,UL_224,UL_226;	UL_224	lincRNA	chr17	24451389	24459380	+	7992	4306	LAST	8	chr17	24456263	24459380	3118	93	2.98268	2.15978	41.0822	exonized	TDR22	DNA	chr17	24458441	24458533	-	13.7
ID=chr17:+:gene:24451389:24460360;children=UL_225,UL_224,UL_226;	UL_224	lincRNA	chr17	24451389	24459380	+	7992	4306	LAST	8	chr17	24456263	24459380	3118	108	3.46376	2.50813	41.0822	exonized	TDR22	DNA	chr17	24458309	24458416	-	13.7
ID=chr17:+:gene:24451389:24460360;children=UL_225,UL_224,UL_226;	UL_224	lincRNA	chr17	24451389	24459380	+	7992	4306	LAST	8	chr17	24456263	24459380	3118	171	5.48428	3.9712	41.0822	exonized	TDR22	DNA	chr17	24456520	24456690	-	13.7
ID=chr17:+:gene:24451389:24460360;children=UL_225,UL_224,UL_226;	UL_224	lincRNA	chr17	24451389	24459380	+	7992	4306	LAST	8	chr17	24456263	24459380	3118	429	13.7588	9.96284	41.0822	exonized	MuDR-N1_DR	DNA/MuDR	chr17	24457838	24458266	-	10.9
ID=chr17:+:gene:24451389:24460360;children=UL_225,UL_224,UL_226;	UL_224	lincRNA	chr17	24451389	24459380	+	7992	4306	LAST	8	chr17	24456263	24459380	3118	402	12.8929	9.33581	41.0822	exonized	MuDR-N1_DR	DNA/MuDR	chr17	24457061	24457462	-	10.9
ID=chr17:+:gene:24451389:24460360;children=UL_225,UL_224,UL_226;	UL_224	lincRNA	chr17	24451389	24459380	+	7992	4306	LAST	8	chr17	24456263	24459380	3118	107	3.43169	2.4849	41.0822	exonized	LOOPERN4B_DR	DNA/PiggyBac	chr17	24456417	24456523	+	12.4
ID=chr17:+:gene:24451389:24460360;children=UL_225,UL_224,UL_226;	UL_224	lincRNA	chr17	24451389	24459380	+	7992	4306	LAST	8	chr17	24456263	24459380	3118	206	6.6068	4.78402	41.0822	exonized	DNA-6-N5_DR	DNA	chr17	24457505	24457710	-	17.4
ID=chr17:+:gene:24451389:24460360;children=UL_225,UL_224,UL_226;	UL_224	lincRNA	chr17	24451389	24459380	+	7992	4306	LAST	8	chr17	24456263	24459380	3118	65	2.08467	1.50952	41.0822	exonized	DIRS-1-LTR_DR	LTR/DIRS	chr17	24458728	24458792	-	15.4
ID=chr17:+:gene:24451389:24460360;children=UL_225,UL_224,UL_226;	UL_225	lincRNA	chr17	24451389	24459410	+	8022	4336	LAST	8	chr17	24456263	24459410	3148	188	5.97205	4.33579	40.798	exonized	hAT-N66B_DR	DNA/hAT-Charlie	chr17	24456734	24456921	+	10.7
ID=chr17:+:gene:24451389:24460360;children=UL_225,UL_224,UL_226;	UL_225	lincRNA	chr17	24451389	24459410	+	8022	4336	LAST	8	chr17	24456263	24459410	3148	93	2.95426	2.14483	40.798	exonized	TDR22	DNA	chr17	24458441	24458533	-	13.7
ID=chr17:+:gene:24451389:24460360;children=UL_225,UL_224,UL_226;	UL_225	lincRNA	chr17	24451389	24459410	+	8022	4336	LAST	8	chr17	24456263	24459410	3148	108	3.43075	2.49077	40.798	exonized	TDR22	DNA	chr17	24458309	24458416	-	13.7
ID=chr17:+:gene:24451389:24460360;children=UL_225,UL_224,UL_226;	UL_225	lincRNA	chr17	24451389	24459410	+	8022	4336	LAST	8	chr17	24456263	24459410	3148	171	5.43202	3.94373	40.798	exonized	TDR22	DNA	chr17	24456520	24456690	-	13.7
ID=chr17:+:gene:24451389:24460360;children=UL_225,UL_224,UL_226;	UL_225	lincRNA	chr17	24451389	24459410	+	8022	4336	LAST	8	chr17	24456263	24459410	3148	429	13.6277	9.89391	40.798	exonized	MuDR-N1_DR	DNA/MuDR	chr17	24457838	24458266	-	10.9
ID=chr17:+:gene:24451389:24460360;children=UL_225,UL_224,UL_226;	UL_225	lincRNA	chr17	24451389	24459410	+	8022	4336	LAST	8	chr17	24456263	24459410	3148	402	12.77	9.27122	40.798	exonized	MuDR-N1_DR	DNA/MuDR	chr17	24457061	24457462	-	10.9
ID=chr17:+:gene:24451389:24460360;children=UL_225,UL_224,UL_226;	UL_225	lincRNA	chr17	24451389	24459410	+	8022	4336	LAST	8	chr17	24456263	24459410	3148	107	3.39898	2.46771	40.798	exonized	LOOPERN4B_DR	DNA/PiggyBac	chr17	24456417	24456523	+	12.4
ID=chr17:+:gene:24451389:24460360;children=UL_225,UL_224,UL_226;	UL_225	lincRNA	chr17	24451389	24459410	+	8022	4336	LAST	8	chr17	24456263	24459410	3148	206	6.54384	4.75092	40.798	exonized	DNA-6-N5_DR	DNA	chr17	24457505	24457710	-	17.4
ID=chr17:+:gene:24451389:24460360;children=UL_225,UL_224,UL_226;	UL_225	lincRNA	chr17	24451389	24459410	+	8022	4336	LAST	8	chr17	24456263	24459410	3148	65	2.0648	1.49908	40.798	exonized	DIRS-1-LTR_DR	LTR/DIRS	chr17	24458728	24458792	-	15.4
ID=chr17:+:gene:24451389:24460360;children=UL_225,UL_224,UL_226;	UL_226	lincRNA	chr17	24451389	24460360	+	8972	5286	LAST	8	chr17	24456263	24460360	4098	188	4.5876	3.55656	37.5899	exonized	hAT-N66B_DR	DNA/hAT-Charlie	chr17	24456734	24456921	+	10.7
ID=chr17:+:gene:24451389:24460360;children=UL_225,UL_224,UL_226;	UL_226	lincRNA	chr17	24451389	24460360	+	8972	5286	LAST	8	chr17	24456263	24460360	4098	93	2.2694	1.75936	37.5899	exonized	TDR22	DNA	chr17	24458441	24458533	-	13.7
ID=chr17:+:gene:24451389:24460360;children=UL_225,UL_224,UL_226;	UL_226	lincRNA	chr17	24451389	24460360	+	8972	5286	LAST	8	chr17	24456263	24460360	4098	108	2.63543	2.04313	37.5899	exonized	TDR22	DNA	chr17	24458309	24458416	-	13.7
ID=chr17:+:gene:24451389:24460360;children=UL_225,UL_224,UL_226;	UL_226	lincRNA	chr17	24451389	24460360	+	8972	5286	LAST	8	chr17	24456263	24460360	4098	171	4.17277	3.23496	37.5899	exonized	TDR22	DNA	chr17	24456520	24456690	-	13.7
ID=chr17:+:gene:24451389:24460360;children=UL_225,UL_224,UL_226;	UL_226	lincRNA	chr17	24451389	24460360	+	8972	5286	LAST	8	chr17	24456263	24460360	4098	429	10.4685	8.11578	37.5899	exonized	MuDR-N1_DR	DNA/MuDR	chr17	24457838	24458266	-	10.9
ID=chr17:+:gene:24451389:24460360;children=UL_225,UL_224,UL_226;	UL_226	lincRNA	chr17	24451389	24460360	+	8972	5286	LAST	8	chr17	24456263	24460360	4098	402	9.80966	7.60499	37.5899	exonized	MuDR-N1_DR	DNA/MuDR	chr17	24457061	24457462	-	10.9
ID=chr17:+:gene:24451389:24460360;children=UL_225,UL_224,UL_226;	UL_226	lincRNA	chr17	24451389	24460360	+	8972	5286	LAST	8	chr17	24456263	24460360	4098	107	2.61103	2.02421	37.5899	exonized	LOOPERN4B_DR	DNA/PiggyBac	chr17	24456417	24456523	+	12.4
ID=chr17:+:gene:24451389:24460360;children=UL_225,UL_224,UL_226;	UL_226	lincRNA	chr17	24451389	24460360	+	8972	5286	LAST	8	chr17	24456263	24460360	4098	11	0.268424	0.208097	37.5899	exonized	EnSpm-N1_DR	DNA/En-Spm	chr17	24459416	24459426	+	19.7
ID=chr17:+:gene:24451389:24460360;children=UL_225,UL_224,UL_226;	UL_226	lincRNA	chr17	24451389	24460360	+	8972	5286	LAST	8	chr17	24456263	24460360	4098	206	5.02684	3.89709	37.5899	exonized	DNA-6-N5_DR	DNA	chr17	24457505	24457710	-	17.4
ID=chr17:+:gene:24451389:24460360;children=UL_225,UL_224,UL_226;	UL_226	lincRNA	chr17	24451389	24460360	+	8972	5286	LAST	8	chr17	24456263	24460360	4098	65	1.58614	1.22966	37.5899	exonized	DIRS-1-LTR_DR	LTR/DIRS	chr17	24458728	24458792	-	15.4
ID=chr17:+:gene:24451389:24460360;children=UL_225,UL_224,UL_226;	UL_226	lincRNA	chr17	24451389	24460360	+	8972	5286	LAST	8	chr17	24456263	24460360	4098	207	5.05124	3.916	37.5899	exonized	ANGEL	DNA/hAT	chr17	24459427	24459633	+	17.6
ID=chr17:+:gene:26690280:26692214;children=Zv9_00039500;	Zv9_00039500	lincRNA	chr17	26690280	26692214	+	1935	488	FIRST	1	chr17	26690280	26690689	410	170	41.4634	34.8361	34.8361	exonized	HATN4_DR	DNA/hAT-Charlie	chr17	26690313	26690482	-	11.8
ID=chr17:+:gene:27017933:27025136;children=UL_231,UL_230;	UL_230	lincRNA	chr17	27017933	27025104	+	7172	7172	SINGLE	1	chr17	27017933	27025104	7172	244	3.40212	3.40212	12.9532	exonized	hAT-N51_DR	DNA/hAT-Ac	chr17	27019753	27019996	+	11.6
ID=chr17:+:gene:27017933:27025136;children=UL_231,UL_230;	UL_230	lincRNA	chr17	27017933	27025104	+	7172	7172	SINGLE	1	chr17	27017933	27025104	7172	122	1.70106	1.70106	12.9532	exonized	hAT-N51_DR	DNA/hAT-Ac	chr17	27019454	27019575	+	11.6
ID=chr17:+:gene:27017933:27025136;children=UL_231,UL_230;	UL_230	lincRNA	chr17	27017933	27025104	+	7172	7172	SINGLE	1	chr17	27017933	27025104	7172	173	2.41216	2.41216	12.9532	exonized	SINE2-1_DR	SINE/tRNA	chr17	27019580	27019752	-	19.1
ID=chr17:+:gene:27017933:27025136;children=UL_231,UL_230;	UL_230	lincRNA	chr17	27017933	27025104	+	7172	7172	SINGLE	1	chr17	27017933	27025104	7172	37	0.515895	0.515895	12.9532	exonized	HATN12_DR	DNA/hAT-Ac	chr17	27023670	27023706	+	16.5
ID=chr17:+:gene:27017933:27025136;children=UL_231,UL_230;	UL_230	lincRNA	chr17	27017933	27025104	+	7172	7172	SINGLE	1	chr17	27017933	27025104	7172	60	0.836587	0.836587	12.9532	exonized	HATN12_DR	DNA/hAT-Ac	chr17	27023379	27023438	+	16.5
ID=chr17:+:gene:27017933:27025136;children=UL_231,UL_230;	UL_230	lincRNA	chr17	27017933	27025104	+	7172	7172	SINGLE	1	chr17	27017933	27025104	7172	107	1.49191	1.49191	12.9532	exonized	HATN12_DR	DNA/hAT-Ac	chr17	27023090	27023196	+	16.5
ID=chr17:+:gene:27017933:27025136;children=UL_231,UL_230;	UL_230	lincRNA	chr17	27017933	27025104	+	7172	7172	SINGLE	1	chr17	27017933	27025104	7172	50	0.697156	0.697156	12.9532	exonized	DNA-2-12_DR	DNA/En-Spm?	chr17	27021952	27022001	+	16.6
ID=chr17:+:gene:27017933:27025136;children=UL_231,UL_230;	UL_230	lincRNA	chr17	27017933	27025104	+	7172	7172	SINGLE	1	chr17	27017933	27025104	7172	39	0.543781	0.543781	12.9532	exonized	DNA-2-12_DR	DNA/En-Spm?	chr17	27021610	27021648	-	16.6
ID=chr17:+:gene:27017933:27025136;children=UL_231,UL_230;	UL_230	lincRNA	chr17	27017933	27025104	+	7172	7172	SINGLE	1	chr17	27017933	27025104	7172	52	0.725042	0.725042	12.9532	exonized	ANGEL	DNA/hAT	chr17	27021962	27022013	-	17.6
ID=chr17:+:gene:27017933:27025136;children=UL_231,UL_230;	UL_230	lincRNA	chr17	27017933	27025104	+	7172	7172	SINGLE	1	chr17	27017933	27025104	7172	45	0.62744	0.62744	12.9532	exonized	ANGEL	DNA/hAT	chr17	27021602	27021646	-	17.6
ID=chr17:+:gene:27017933:27025136;children=UL_231,UL_230;	UL_231	lincRNA	chr17	27017933	27025136	+	7204	7204	SINGLE	1	chr17	27017933	27025136	7204	244	3.38701	3.38701	12.8956	exonized	hAT-N51_DR	DNA/hAT-Ac	chr17	27019753	27019996	+	11.6
ID=chr17:+:gene:27017933:27025136;children=UL_231,UL_230;	UL_231	lincRNA	chr17	27017933	27025136	+	7204	7204	SINGLE	1	chr17	27017933	27025136	7204	122	1.6935	1.6935	12.8956	exonized	hAT-N51_DR	DNA/hAT-Ac	chr17	27019454	27019575	+	11.6
ID=chr17:+:gene:27017933:27025136;children=UL_231,UL_230;	UL_231	lincRNA	chr17	27017933	27025136	+	7204	7204	SINGLE	1	chr17	27017933	27025136	7204	173	2.40144	2.40144	12.8956	exonized	SINE2-1_DR	SINE/tRNA	chr17	27019580	27019752	-	19.1
ID=chr17:+:gene:27017933:27025136;children=UL_231,UL_230;	UL_231	lincRNA	chr17	27017933	27025136	+	7204	7204	SINGLE	1	chr17	27017933	27025136	7204	37	0.513604	0.513604	12.8956	exonized	HATN12_DR	DNA/hAT-Ac	chr17	27023670	27023706	+	16.5
ID=chr17:+:gene:27017933:27025136;children=UL_231,UL_230;	UL_231	lincRNA	chr17	27017933	27025136	+	7204	7204	SINGLE	1	chr17	27017933	27025136	7204	60	0.832871	0.832871	12.8956	exonized	HATN12_DR	DNA/hAT-Ac	chr17	27023379	27023438	+	16.5
ID=chr17:+:gene:27017933:27025136;children=UL_231,UL_230;	UL_231	lincRNA	chr17	27017933	27025136	+	7204	7204	SINGLE	1	chr17	27017933	27025136	7204	107	1.48529	1.48529	12.8956	exonized	HATN12_DR	DNA/hAT-Ac	chr17	27023090	27023196	+	16.5
ID=chr17:+:gene:27017933:27025136;children=UL_231,UL_230;	UL_231	lincRNA	chr17	27017933	27025136	+	7204	7204	SINGLE	1	chr17	27017933	27025136	7204	50	0.694059	0.694059	12.8956	exonized	DNA-2-12_DR	DNA/En-Spm?	chr17	27021952	27022001	+	16.6
ID=chr17:+:gene:27017933:27025136;children=UL_231,UL_230;	UL_231	lincRNA	chr17	27017933	27025136	+	7204	7204	SINGLE	1	chr17	27017933	27025136	7204	39	0.541366	0.541366	12.8956	exonized	DNA-2-12_DR	DNA/En-Spm?	chr17	27021610	27021648	-	16.6
ID=chr17:+:gene:27017933:27025136;children=UL_231,UL_230;	UL_231	lincRNA	chr17	27017933	27025136	+	7204	7204	SINGLE	1	chr17	27017933	27025136	7204	52	0.721821	0.721821	12.8956	exonized	ANGEL	DNA/hAT	chr17	27021962	27022013	-	17.6
ID=chr17:+:gene:27017933:27025136;children=UL_231,UL_230;	UL_231	lincRNA	chr17	27017933	27025136	+	7204	7204	SINGLE	1	chr17	27017933	27025136	7204	45	0.624653	0.624653	12.8956	exonized	ANGEL	DNA/hAT	chr17	27021602	27021646	-	17.6
ID=chr17:+:gene:27198644:27200840;children=Zv9_00039513;	Zv9_00039513	lincRNA	chr17	27198644	27200840	+	2197	168	FIRST	1	chr17	27198644	27198736	93	30	32.2581	17.8571	17.8571	SPL	DNA-X-9_DR	DNA	chr17	27198707	27198808	+	19.5
ID=chr17:+:gene:29782461:29787852;children=Zv9_00039585;	Zv9_00039585	lincRNA	chr17	29782461	29787852	+	5392	1510	FIRST	1	chr17	29782461	29782876	416	269	64.6635	17.8146	22.9139	TSS	HarbingerN6_DR	DNA/Harbinger	chr17	29782445	29782729	+	14.9
ID=chr17:+:gene:29782461:29787852;children=Zv9_00039585;	Zv9_00039585	lincRNA	chr17	29782461	29787852	+	5392	1510	FIRST	1	chr17	29782461	29782876	416	77	18.5096	5.09934	22.9139	SPL	ANGEL	DNA/hAT	chr17	29782800	29782924	+	17.6
ID=chr17:+:gene:4008765:4009867;children=UL_217;	UL_217	lincRNA	chr17	4008765	4009867	+	1103	1103	SINGLE	1	chr17	4008765	4009867	1103	228	20.6709	20.6709	20.6709	exonized	Kolobok-N4_DR	DNA/Kolobok	chr17	4008940	4009167	+	18.7
ID=chr17:+:gene:43640455:43655691;children=UL_234;	UL_234	lincRNA	chr17	43640455	43655691	+	15237	2739	LAST	15	chr17	43655042	43655691	650	74	11.3846	2.70172	5.95108	exonized	ANGEL	DNA/hAT	chr17	43655442	43655515	+	17.6
ID=chr17:+:gene:43640455:43655691;children=UL_234;	UL_234	lincRNA	chr17	43640455	43655691	+	15237	2739	LAST	15	chr17	43655042	43655691	650	89	13.6923	3.24936	5.95108	exonized	ANGEL	DNA/hAT	chr17	43655265	43655353	-	17.6
ID=chr17:+:gene:53296269:53320424;children=Zv9_00039987;	Zv9_00039987	lincRNA	chr17	53296269	53320424	+	24156	1773	LAST	2	chr17	53318793	53320424	1632	135	8.27206	7.61421	7.61421	exonized	DNA-2-30_DR	DNA	chr17	53319213	53319347	-	14
ID=chr17:+:gene:53907532:53909291;children=UL_238;	UL_238	lincRNA	chr17	53907532	53909291	+	1760	1760	SINGLE	1	chr17	53907532	53909291	1760	46	2.61364	2.61364	75.9659	exonized	TE-X-4_DR	Unknown	chr17	53908657	53908702	-	17.1
ID=chr17:+:gene:53907532:53909291;children=UL_238;	UL_238	lincRNA	chr17	53907532	53909291	+	1760	1760	SINGLE	1	chr17	53907532	53909291	1760	238	13.5227	13.5227	75.9659	exonized	TDR6	DNA	chr17	53908913	53909150	+	16.6
ID=chr17:+:gene:53907532:53909291;children=UL_238;	UL_238	lincRNA	chr17	53907532	53909291	+	1760	1760	SINGLE	1	chr17	53907532	53909291	1760	36	2.04545	2.04545	75.9659	exonized	TDR18	DNA/hAT-Charlie	chr17	53908120	53908155	-	10.6
ID=chr17:+:gene:53907532:53909291;children=UL_238;	UL_238	lincRNA	chr17	53907532	53909291	+	1760	1760	SINGLE	1	chr17	53907532	53909291	1760	206	11.7045	11.7045	75.9659	TSS	TDR18	DNA/hAT-Charlie	chr17	53907201	53907737	-	10.6
ID=chr17:+:gene:53907532:53909291;children=UL_238;	UL_238	lincRNA	chr17	53907532	53909291	+	1760	1760	SINGLE	1	chr17	53907532	53909291	1760	301	17.1023	17.1023	75.9659	exonized	TDR16	DNA	chr17	53908356	53908656	+	13.9
ID=chr17:+:gene:53907532:53909291;children=UL_238;	UL_238	lincRNA	chr17	53907532	53909291	+	1760	1760	SINGLE	1	chr17	53907532	53909291	1760	183	10.3977	10.3977	75.9659	exonized	EnSpm-6N1_DR	DNA/En-Spm	chr17	53908156	53908338	-	16.4
ID=chr17:+:gene:53907532:53909291;children=UL_238;	UL_238	lincRNA	chr17	53907532	53909291	+	1760	1760	SINGLE	1	chr17	53907532	53909291	1760	101	5.73864	5.73864	75.9659	exonized	ENSPM-6_DR	DNA/En-Spm	chr17	53908254	53908354	+	17.5
ID=chr17:+:gene:53907532:53909291;children=UL_238;	UL_238	lincRNA	chr17	53907532	53909291	+	1760	1760	SINGLE	1	chr17	53907532	53909291	1760	155	8.80682	8.80682	75.9659	exonized	DNA2-1_DR	DNA/TcMar?	chr17	53907916	53908070	+	15.7
ID=chr17:+:gene:53907532:53909291;children=UL_238;	UL_238	lincRNA	chr17	53907532	53909291	+	1760	1760	SINGLE	1	chr17	53907532	53909291	1760	71	4.03409	4.03409	75.9659	exonized	DNA-2-29_DR	DNA	chr17	53908838	53908908	+	13.9
ID=chr17:+:gene:5599017:5599397;children=Zv9_00039015;	Zv9_00039015	lincRNA	chr17	5599017	5599397	+	381	290	FIRST	1	chr17	5599017	5599245	229	60	26.2009	20.6897	20.6897	exonized	DNA-8-35_DR	DNA/hAT-Tip100?	chr17	5599102	5599161	+	13.3
ID=chr17:+:gene:930819:943992;children=Zv9_00038945,Zv9_00038944,Zv9_00038946;	Zv9_00038945	lincRNA	chr17	930819	943904	+	13086	1383	LAST	2	chr17	942878	943904	1027	119	11.5871	8.60448	36.804	exonized	SINE3-1a	SINE/5S	chr17	943459	943577	-	9.92
ID=chr17:+:gene:930819:943992;children=Zv9_00038945,Zv9_00038944,Zv9_00038946;	Zv9_00038945	lincRNA	chr17	930819	943904	+	13086	1383	LAST	2	chr17	942878	943904	1027	106	10.3213	7.6645	36.804	exonized	Mariner-N5_DR	DNA/TcMar	chr17	943717	943822	-	15.1
ID=chr17:+:gene:930819:943992;children=Zv9_00038945,Zv9_00038944,Zv9_00038946;	Zv9_00038945	lincRNA	chr17	930819	943904	+	13086	1383	LAST	2	chr17	942878	943904	1027	90	8.76339	6.50759	36.804	exonized	LOOPERN2_DR	DNA/Kolobok	chr17	942910	942999	-	3.9
ID=chr17:+:gene:930819:943992;children=Zv9_00038945,Zv9_00038944,Zv9_00038946;	Zv9_00038945	lincRNA	chr17	930819	943904	+	13086	1383	LAST	2	chr17	942878	943904	1027	136	13.2425	9.83369	36.804	exonized	HE1_DR1	SINE/V	chr17	943740	943875	-	13.2
ID=chr17:+:gene:930819:943992;children=Zv9_00038945,Zv9_00038944,Zv9_00038946;	Zv9_00038945	lincRNA	chr17	930819	943904	+	13086	1383	LAST	2	chr17	942878	943904	1027	58	5.64752	4.19378	36.804	exonized	DNA-2-18_DR	DNA/En-Spm?	chr17	942967	943024	+	16.2
ID=chr17:+:gene:930819:943992;children=Zv9_00038945,Zv9_00038944,Zv9_00038946;	Zv9_00038946	lincRNA	chr17	930819	943992	+	13174	1526	LAST	3	chr17	942878	943992	1115	119	10.6726	7.79817	33.3552	exonized	SINE3-1a	SINE/5S	chr17	943459	943577	-	9.92
ID=chr17:+:gene:930819:943992;children=Zv9_00038945,Zv9_00038944,Zv9_00038946;	Zv9_00038946	lincRNA	chr17	930819	943992	+	13174	1526	LAST	3	chr17	942878	943992	1115	106	9.50673	6.94626	33.3552	exonized	Mariner-N5_DR	DNA/TcMar	chr17	943717	943822	-	15.1
ID=chr17:+:gene:930819:943992;children=Zv9_00038945,Zv9_00038944,Zv9_00038946;	Zv9_00038946	lincRNA	chr17	930819	943992	+	13174	1526	LAST	3	chr17	942878	943992	1115	90	8.07175	5.89777	33.3552	exonized	LOOPERN2_DR	DNA/Kolobok	chr17	942910	942999	-	3.9
ID=chr17:+:gene:930819:943992;children=Zv9_00038945,Zv9_00038944,Zv9_00038946;	Zv9_00038946	lincRNA	chr17	930819	943992	+	13174	1526	LAST	3	chr17	942878	943992	1115	136	12.1973	8.91219	33.3552	exonized	HE1_DR1	SINE/V	chr17	943740	943875	-	13.2
ID=chr17:+:gene:930819:943992;children=Zv9_00038945,Zv9_00038944,Zv9_00038946;	Zv9_00038946	lincRNA	chr17	930819	943992	+	13174	1526	LAST	3	chr17	942878	943992	1115	58	5.20179	3.80079	33.3552	exonized	DNA-2-18_DR	DNA/En-Spm?	chr17	942967	943024	+	16.2
ID=chr18:-:gene:12758330:12764327;children=Zv9_00042353;	Zv9_00042353	lincRNA	chr18	12758330	12764327	-	5998	277	FIRST	1	chr18	12764273	12764327	55	55	100	19.8556	19.8556	TSS_SPL	ERV1-N3B-LTR_DR	LTR	chr18	12763343	12764858	-	13.1
ID=chr18:-:gene:23233049:23379386;children=Zv9_00042603,Zv9_00042599,Zv9_00042600,Zv9_00042601,Zv9_00042597,Zv9_00042598,Zv9_00042602;	Zv9_00042598	lincRNA	chr18	23262889	23379328	-	116440	1577	LAST	5	chr18	23262889	23263696	808	209	25.8663	13.253	13.253	exonized	DNA11TA1_DR	DNA/TcMar-Tc1	chr18	23263142	23263350	+	14.2
ID=chr18:-:gene:23233049:23379386;children=Zv9_00042603,Zv9_00042599,Zv9_00042601,Zv9_00042600,Zv9_00042598,Zv9_00042597,Zv9_00042602;	Zv9_00042600	lincRNA	chr18	23325603	23379288	-	53686	1264	LAST	4	chr18	23325603	23326180	578	105	18.1661	8.30696	8.30696	exonized	hAT-N22_DR	DNA/hAT	chr18	23325835	23325939	-	14.3
ID=chr18:-:gene:23233049:23379386;children=Zv9_00042603,Zv9_00042599,Zv9_00042601,Zv9_00042600,Zv9_00042598,Zv9_00042597,Zv9_00042602;	Zv9_00042601	lincRNA	chr18	23340850	23379332	-	38483	781	LAST	4	chr18	23340850	23340900	51	51	100	6.53009	6.53009	PolyA_SPL	DNA-X-2B_DR	DNA	chr18	23340834	23341129	+	12.7
ID=chr18:-:gene:23233049:23379386;children=Zv9_00042603,Zv9_00042599,Zv9_00042601,Zv9_00042600,Zv9_00042598,Zv9_00042597,Zv9_00042602;	Zv9_00042602	lincRNA	chr18	23341611	23379328	-	37718	2703	LAST	3	chr18	23341611	23343803	2193	458	20.8846	16.9441	16.9441	exonized	TDR7	DNA	chr18	23343051	23343508	-	12.5
ID=chr18:-:gene:24773968:24780765;children=UL_250,UL_251;	UL_250	lincRNA	chr18	24773968	24780765	-	6798	6798	SINGLE	1	chr18	24773968	24780765	6798	341	5.01618	5.01618	5.01618	exonized	Kolobok-N3_DR	DNA/Kolobok?	chr18	24777141	24777481	+	15.6
ID=chr18:-:gene:24964621:25009082;children=UL_252;	UL_252	lincRNA	chr18	24964621	25009082	-	44462	636	MIDDLE	2	chr18	24987398	24987545	148	148	100	23.2704	23.2704	Both_SPL	DNA-X-4_DR	DNA	chr18	24987322	24987735	-	11.4
ID=chr18:-:gene:271269:272667;children=UL_239;	UL_239	lincRNA	chr18	271269	272667	-	1399	1399	SINGLE	1	chr18	271269	272667	1399	158	11.2938	11.2938	11.2938	exonized	CR1-3_DR	LINE/L2	chr18	271271	271428	-	11.4
ID=chr18:-:gene:29347429:29352505;children=UL_253;	UL_253	lincRNA	chr18	29347429	29352505	-	5077	5077	SINGLE	1	chr18	29347429	29352505	5077	293	5.77112	5.77112	18.3376	exonized	TDR18	DNA/hAT-Charlie	chr18	29348024	29348316	-	10.6
ID=chr18:-:gene:29347429:29352505;children=UL_253;	UL_253	lincRNA	chr18	29347429	29352505	-	5077	5077	SINGLE	1	chr18	29347429	29352505	5077	308	6.06657	6.06657	18.3376	exonized	TDR16	DNA	chr18	29351101	29351408	+	13.9
ID=chr18:-:gene:29347429:29352505;children=UL_253;	UL_253	lincRNA	chr18	29347429	29352505	-	5077	5077	SINGLE	1	chr18	29347429	29352505	5077	291	5.73173	5.73173	18.3376	exonized	TDR16	DNA	chr18	29350702	29350992	+	13.9
ID=chr18:-:gene:29347429:29352505;children=UL_253;	UL_253	lincRNA	chr18	29347429	29352505	-	5077	5077	SINGLE	1	chr18	29347429	29352505	5077	39	0.76817	0.76817	18.3376	exonized	Helitron-N3_DR	DNA/Helitron	chr18	29347985	29348023	-	14.5
ID=chr18:-:gene:35209416:35227207;children=Zv9_00042708,Zv9_00042707;	Zv9_00042707	lincRNA	chr18	35209416	35226542	-	17127	1545	FIRST	1	chr18	35226294	35226542	249	232	93.1727	15.0162	30.7443	TSS	Gypsy140-LTR_DR	LTR/Gypsy	chr18	35226311	35227093	-	14.5
ID=chr18:-:gene:35209416:35227207;children=Zv9_00042708,Zv9_00042707;	Zv9_00042707	lincRNA	chr18	35209416	35226542	-	17127	1545	LAST	3	chr18	35209416	35210544	1129	88	7.79451	5.69579	30.7443	exonized	TDR3	DNA/hAT-Charlie	chr18	35209501	35209588	-	16.3
ID=chr18:-:gene:35209416:35227207;children=Zv9_00042708,Zv9_00042707;	Zv9_00042707	lincRNA	chr18	35209416	35226542	-	17127	1545	LAST	3	chr18	35209416	35210544	1129	137	12.1346	8.86731	30.7443	exonized	DNA-6-N5_DR	DNA	chr18	35209591	35209727	-	17.4
ID=chr18:-:gene:35209416:35227207;children=Zv9_00042708,Zv9_00042707;	Zv9_00042707	lincRNA	chr18	35209416	35226542	-	17127	1545	LAST	3	chr18	35209416	35210544	1129	18	1.59433	1.16505	30.7443	exonized	DNA-2-18_DR	DNA/En-Spm?	chr18	35209483	35209500	-	16.2
ID=chr18:-:gene:35209416:35227207;children=Zv9_00042708,Zv9_00042707;	Zv9_00042708	lincRNA	chr18	35209416	35227207	-	17792	1491	FIRST	1	chr18	35227072	35227207	136	22	16.1765	1.47552	21.7304	SPL	Gypsy140-LTR_DR	LTR/Gypsy	chr18	35226311	35227093	-	14.5
ID=chr18:-:gene:35209416:35227207;children=Zv9_00042708,Zv9_00042707;	Zv9_00042708	lincRNA	chr18	35209416	35227207	-	17792	1491	MIDDLE	2	chr18	35226783	35226841	59	59	100	3.95708	21.7304	Both_SPL	Gypsy140-LTR_DR	LTR/Gypsy	chr18	35226311	35227093	-	14.5
ID=chr18:-:gene:35209416:35227207;children=Zv9_00042708,Zv9_00042707;	Zv9_00042708	lincRNA	chr18	35209416	35227207	-	17792	1491	LAST	4	chr18	35209416	35210544	1129	88	7.79451	5.90208	21.7304	exonized	TDR3	DNA/hAT-Charlie	chr18	35209501	35209588	-	16.3
ID=chr18:-:gene:35209416:35227207;children=Zv9_00042708,Zv9_00042707;	Zv9_00042708	lincRNA	chr18	35209416	35227207	-	17792	1491	LAST	4	chr18	35209416	35210544	1129	137	12.1346	9.18846	21.7304	exonized	DNA-6-N5_DR	DNA	chr18	35209591	35209727	-	17.4
ID=chr18:-:gene:35209416:35227207;children=Zv9_00042708,Zv9_00042707;	Zv9_00042708	lincRNA	chr18	35209416	35227207	-	17792	1491	LAST	4	chr18	35209416	35210544	1129	18	1.59433	1.20724	21.7304	exonized	DNA-2-18_DR	DNA/En-Spm?	chr18	35209483	35209500	-	16.2
ID=chr18:-:gene:4041986:4051915;children=UL_241;	UL_241	lincRNA	chr18	4041986	4051915	-	9930	400	FIRST	1	chr18	4051862	4051915	54	54	100	13.5	19.75	TSS_SPL	Gypsy35-LTR_DR	LTR/Gypsy	chr18	4051690	4052478	+	9.9
ID=chr18:-:gene:4041986:4051915;children=UL_241;	UL_241	lincRNA	chr18	4041986	4051915	-	9930	400	LAST	3	chr18	4041986	4042163	178	25	14.0449	6.25	19.75	SPL	hAT-N56_DR	DNA/hAT-Ac	chr18	4042139	4042728	-	9.5
ID=chr18:-:gene:44662301:44667102;children=Zv9_00042843,Zv9_00042842;	Zv9_00042842	lincRNA	chr18	44662301	44665013	-	2713	1677	FIRST	1	chr18	44663716	44665013	1298	126	9.70724	7.51342	7.51342	TSS	Helitron-N3_DR	DNA/Helitron	chr18	44664888	44665170	-	14.5
ID=chr18:-:gene:46264160:46268908;children=Zv9_00042863;	Zv9_00042863	lincRNA	chr18	46264160	46268908	-	4749	168	LAST	2	chr18	46264160	46264217	58	37	63.7931	22.0238	70.2381	SPL	Mariner-N2_DR	DNA/TcMar	chr18	46264181	46264312	-	16.5
ID=chr18:-:gene:46264160:46268908;children=Zv9_00042863;	Zv9_00042863	lincRNA	chr18	46264160	46268908	-	4749	168	LAST	2	chr18	46264160	46264217	58	58	100	34.5238	70.2381	PolyA_SPL	EnSpm-6N1_DR	DNA/En-Spm	chr18	46264013	46264298	-	16.4
ID=chr18:-:gene:46264160:46268908;children=Zv9_00042863;	Zv9_00042863	lincRNA	chr18	46264160	46268908	-	4749	168	LAST	2	chr18	46264160	46264217	58	23	39.6552	13.6905	70.2381	PolyA	DIRS-N1_DR	LTR/Ngaro	chr18	46263986	46264182	+	15.4
ID=chr18:-:gene:46333963:46337737;children=UL_258;	UL_258	lincRNA	chr18	46333963	46337737	-	3775	3775	SINGLE	1	chr18	46333963	46337737	3775	257	6.80795	6.80795	15.894	exonized	hAT-N24_DR	DNA/hAT?	chr18	46335705	46335961	-	11.1
ID=chr18:-:gene:46333963:46337737;children=UL_258;	UL_258	lincRNA	chr18	46333963	46337737	-	3775	3775	SINGLE	1	chr18	46333963	46337737	3775	144	3.81457	3.81457	15.894	exonized	HATN14_DR	DNA/hAT	chr18	46336184	46336327	-	16.6
ID=chr18:-:gene:46333963:46337737;children=UL_258;	UL_258	lincRNA	chr18	46333963	46337737	-	3775	3775	SINGLE	1	chr18	46333963	46337737	3775	199	5.27152	5.27152	15.894	exonized	EnSpm-N4_DR	DNA/En-Spm?	chr18	46335963	46336161	-	14.2
ID=chr18:-:gene:5954765:5958493;children=UL_243,UL_242;	UL_243	lincRNA	chr18	5955072	5958493	-	3422	669	FIRST	1	chr18	5958355	5958493	139	28	20.1439	4.18535	13.154	TSS	Looper-N8_DR	DNA/Kolobok	chr18	5958466	5959221	+	7.7
ID=chr18:-:gene:5954765:5958493;children=UL_243,UL_242;	UL_243	lincRNA	chr18	5955072	5958493	-	3422	669	FIRST	1	chr18	5958355	5958493	139	60	43.1655	8.96861	13.154	SPL	HATN14_DR	DNA/hAT	chr18	5958305	5958414	-	16.6
ID=chr18:-:gene:5954765:5958493;children=UL_243,UL_242;	UL_244	lincRNA	chr18	12611360	12637457	+	26098	5536	LAST	7	chr18	12632984	12637457	4474	644	14.3943	11.6329	13.927	exonized	TDR8D	DNA	chr18	12635751	12636394	-	12.7
ID=chr18:-:gene:5954765:5958493;children=UL_243,UL_242;	UL_244	lincRNA	chr18	12611360	12637457	+	26098	5536	LAST	7	chr18	12632984	12637457	4474	127	2.83862	2.29408	13.927	exonized	HE1_DR1	SINE/V	chr18	12635431	12635557	+	13.2
ID=chr18:-:gene:951678:958131;children=Zv9_00042154,Zv9_00042153;	Zv9_00042153	lincRNA	chr18	951678	958131	-	6454	758	LAST	4	chr18	951678	952077	400	56	14	7.38786	13.5884	PolyA	TDR18	DNA/hAT-Charlie	chr18	951209	951733	+	10.6
ID=chr18:-:gene:951678:958131;children=Zv9_00042154,Zv9_00042153;	Zv9_00042153	lincRNA	chr18	951678	958131	-	6454	758	LAST	4	chr18	951678	952077	400	47	11.75	6.20053	13.5884	exonized	EnSpm-N2_DR	DNA/En-Spm	chr18	951694	951740	+	14
ID=chr18:-:gene:951678:958131;children=Zv9_00042154,Zv9_00042153;	Zv9_00042154	lincRNA	chr18	951678	958131	-	6454	838	LAST	3	chr18	951678	952226	549	56	10.2004	6.68258	12.2912	PolyA	TDR18	DNA/hAT-Charlie	chr18	951209	951733	+	10.6
ID=chr18:-:gene:951678:958131;children=Zv9_00042154,Zv9_00042153;	Zv9_00042154	lincRNA	chr18	951678	958131	-	6454	838	LAST	3	chr18	951678	952226	549	47	8.56102	5.60859	12.2912	exonized	EnSpm-N2_DR	DNA/En-Spm	chr18	951694	951740	+	14
ID=chr18:+:gene:12566332:12841855;children=UL_244,Zv9_00041401,Zv9_00041403;	Zv9_00041401	lincRNA	chr18	12566332	12841855	+	275524	2159	FIRST	1	chr18	12566332	12566569	238	28	11.7647	1.2969	34.3678	SPL	HarbingerN6_DR	DNA/Harbinger	chr18	12566542	12566794	-	14.9
ID=chr18:+:gene:12566332:12841855;children=UL_244,Zv9_00041401,Zv9_00041403;	Zv9_00041401	lincRNA	chr18	12566332	12841855	+	275524	2159	FIRST	1	chr18	12566332	12566569	238	207	86.9748	9.58777	34.3678	TSS	Copia2-LTR_DR	LTR/Gypsy?	chr18	12566289	12566538	+	15.8
ID=chr18:+:gene:12566332:12841855;children=UL_244,Zv9_00041401,Zv9_00041403;	Zv9_00041401	lincRNA	chr18	12566332	12841855	+	275524	2159	LAST	4	chr18	12840212	12841855	1644	206	12.5304	9.54145	34.3678	exonized	TDR18	DNA/hAT-Charlie	chr18	12841363	12841568	-	10.6
ID=chr18:+:gene:12566332:12841855;children=UL_244,Zv9_00041401,Zv9_00041403;	Zv9_00041401	lincRNA	chr18	12566332	12841855	+	275524	2159	LAST	4	chr18	12840212	12841855	1644	61	3.71046	2.82538	34.3678	PolyA	TC1DR3	DNA/TcMar-Tc1	chr18	12841795	12841877	-	10.4
ID=chr18:+:gene:12566332:12841855;children=UL_244,Zv9_00041401,Zv9_00041403;	Zv9_00041401	lincRNA	chr18	12566332	12841855	+	275524	2159	LAST	4	chr18	12840212	12841855	1644	240	14.5985	11.1163	34.3678	exonized	TC1DR3	DNA/TcMar-Tc1	chr18	12841568	12841807	-	10.4
ID=chr18:+:gene:12566332:12841855;children=UL_244,Zv9_00041401,Zv9_00041403;	Zv9_00041403	lincRNA	chr18	12574936	12841667	+	266732	1781	FIRST	1	chr18	12574936	12575056	121	121	100	6.79394	23.9753	TSS_SPL	hAT-N44_DR	DNA/hAT?	chr18	12574851	12575136	-	8.5
ID=chr18:+:gene:12566332:12841855;children=UL_244,Zv9_00041401,Zv9_00041403;	Zv9_00041403	lincRNA	chr18	12574936	12841667	+	266732	1781	LAST	4	chr18	12840212	12841667	1456	206	14.1484	11.5665	23.9753	exonized	TDR18	DNA/hAT-Charlie	chr18	12841363	12841568	-	10.6
ID=chr18:+:gene:12566332:12841855;children=UL_244,Zv9_00041401,Zv9_00041403;	Zv9_00041403	lincRNA	chr18	12574936	12841667	+	266732	1781	LAST	4	chr18	12840212	12841667	1456	100	6.86813	5.61482	23.9753	PolyA	TC1DR3	DNA/TcMar-Tc1	chr18	12841568	12841807	-	10.4
ID=chr18:+:gene:21251159:21254075;children=UL_246;	UL_246	lincRNA	chr18	21251159	21254075	+	2917	2280	FIRST	1	chr18	21251159	21252052	894	57	6.37584	2.5	2.5	TSS	hAT-N44_DR	DNA/hAT?	chr18	21250950	21251215	-	8.5
ID=chr18:+:gene:23661116:23668598;children=Zv9_00041668,Zv9_00041666,Zv9_00041667;	Zv9_00041667	lincRNA	chr18	23661116	23668598	+	7483	1147	LAST	3	chr18	23668148	23668598	451	90	19.9557	7.84656	7.84656	PolyA	TDR18	DNA/hAT-Charlie	chr18	23668509	23669007	+	10.6
ID=chr18:+:gene:23661116:23668598;children=Zv9_00041668,Zv9_00041666,Zv9_00041667;	Zv9_00041668	lincRNA	chr18	23661116	23668598	+	7483	1210	LAST	2	chr18	23667932	23668598	667	90	13.4933	7.43802	7.43802	PolyA	TDR18	DNA/hAT-Charlie	chr18	23668509	23669007	+	10.6
ID=chr18:+:gene:39528905:39567513;children=Zv9_00041874,Zv9_00041875;	Zv9_00041874	lincRNA	chr18	39528905	39567513	+	38609	655	MIDDLE	2	chr18	39532836	39533054	219	219	100	33.4351	33.4351	Both_SPL	EXPANDER1_DR	LINE/RTE	chr18	39532745	39533079	+	12.1
ID=chr18:+:gene:39528905:39567513;children=Zv9_00041874,Zv9_00041875;	Zv9_00041875	lincRNA	chr18	39528915	39567453	+	38539	536	MIDDLE	2	chr18	39532885	39533054	170	170	100	31.7164	31.7164	Both_SPL	EXPANDER1_DR	LINE/RTE	chr18	39532745	39533079	+	12.1
ID=chr18:+:gene:47976227:48008414;children=UL_259;	UL_259	lincRNA	chr18	47976227	48008414	+	32188	6075	LAST	2	chr18	48004914	48008414	3501	374	10.6827	6.15638	42.6502	exonized	TDR13B	DNA	chr18	48006975	48007348	+	15.3
ID=chr18:+:gene:47976227:48008414;children=UL_259;	UL_259	lincRNA	chr18	47976227	48008414	+	32188	6075	LAST	2	chr18	48004914	48008414	3501	203	5.79834	3.34156	42.6502	exonized	TDR13B	DNA	chr18	48006519	48006721	+	15.3
ID=chr18:+:gene:47976227:48008414;children=UL_259;	UL_259	lincRNA	chr18	47976227	48008414	+	32188	6075	LAST	2	chr18	48004914	48008414	3501	210	5.99829	3.45679	42.6502	exonized	TDR13	DNA	chr18	48007357	48007566	+	15.4
ID=chr18:+:gene:47976227:48008414;children=UL_259;	UL_259	lincRNA	chr18	47976227	48008414	+	32188	6075	LAST	2	chr18	48004914	48008414	3501	119	3.39903	1.95885	42.6502	exonized	TDR13	DNA	chr18	48006856	48006974	+	15.4
ID=chr18:+:gene:47976227:48008414;children=UL_259;	UL_259	lincRNA	chr18	47976227	48008414	+	32188	6075	LAST	2	chr18	48004914	48008414	3501	398	11.3682	6.55144	42.6502	exonized	TDR13	DNA	chr18	48006090	48006487	+	15.4
ID=chr18:+:gene:47976227:48008414;children=UL_259;	UL_259	lincRNA	chr18	47976227	48008414	+	32188	6075	LAST	2	chr18	48004914	48008414	3501	166	4.7415	2.73251	42.6502	exonized	TDR13	DNA	chr18	48005683	48005848	+	15.4
ID=chr18:+:gene:47976227:48008414;children=UL_259;	UL_259	lincRNA	chr18	47976227	48008414	+	32188	6075	LAST	2	chr18	48004914	48008414	3501	100	2.85633	1.64609	42.6502	exonized	DNA-8-12_DR	DNA/hAT?	chr18	48007908	48008007	-	12.6
ID=chr18:+:gene:47976227:48008414;children=UL_259;	UL_259	lincRNA	chr18	47976227	48008414	+	32188	6075	LAST	2	chr18	48004914	48008414	3501	288	8.22622	4.74074	42.6502	exonized	DNA-8-12_DR	DNA/hAT?	chr18	48007603	48007890	-	12.6
ID=chr18:+:gene:47976227:48008414;children=UL_259;	UL_259	lincRNA	chr18	47976227	48008414	+	32188	6075	LAST	2	chr18	48004914	48008414	3501	305	8.7118	5.02058	42.6502	exonized	DNA-8-12_DR	DNA/hAT?	chr18	48007569	48007873	+	12.6
ID=chr18:+:gene:47976227:48008414;children=UL_259;	UL_259	lincRNA	chr18	47976227	48008414	+	32188	6075	LAST	2	chr18	48004914	48008414	3501	59	1.68523	0.971193	42.6502	exonized	DNA-8-12_DR	DNA/hAT?	chr18	48006731	48006789	+	12.6
ID=chr18:+:gene:47976227:48008414;children=UL_259;	UL_259	lincRNA	chr18	47976227	48008414	+	32188	6075	LAST	2	chr18	48004914	48008414	3501	153	4.37018	2.51852	42.6502	exonized	DNA-8-12_DR	DNA/hAT?	chr18	48005528	48005680	+	12.6
ID=chr18:+:gene:47976227:48008414;children=UL_259;	UL_259	lincRNA	chr18	47976227	48008414	+	32188	6075	LAST	2	chr18	48004914	48008414	3501	41	1.17109	0.674897	42.6502	exonized	DIRS-1D-LTR_DR	LTR/Ngaro	chr18	48006031	48006071	-	15.7
ID=chr18:+:gene:47976227:48008414;children=UL_259;	UL_259	lincRNA	chr18	47976227	48008414	+	32188	6075	LAST	2	chr18	48004914	48008414	3501	175	4.99857	2.88066	42.6502	exonized	DIRS-1D-LTR_DR	LTR/Ngaro	chr18	48005856	48006030	-	15.7
ID=chr19:-:gene:1065648:1073989;children=UL_261;	UL_261	lincRNA	chr19	1065648	1073989	-	8342	6189	LAST	3	chr19	1065648	1071397	5750	93	1.61739	1.50267	37.195	exonized	hAT-N53_DR	DNA/hAT?	chr19	1069761	1069853	+	15.5
ID=chr19:-:gene:1065648:1073989;children=UL_261;	UL_261	lincRNA	chr19	1065648	1073989	-	8342	6189	LAST	3	chr19	1065648	1071397	5750	60	1.04348	0.969462	37.195	exonized	hAT-N53_DR	DNA/hAT?	chr19	1069496	1069555	+	15.5
ID=chr19:-:gene:1065648:1073989;children=UL_261;	UL_261	lincRNA	chr19	1065648	1073989	-	8342	6189	LAST	3	chr19	1065648	1071397	5750	45	0.782609	0.727096	37.195	exonized	hAT-N53_DR	DNA/hAT?	chr19	1069460	1069504	+	15.5
ID=chr19:-:gene:1065648:1073989;children=UL_261;	UL_261	lincRNA	chr19	1065648	1073989	-	8342	6189	LAST	3	chr19	1065648	1071397	5750	44	0.765217	0.710939	37.195	exonized	hAT-N53_DR	DNA/hAT?	chr19	1068939	1068982	+	15.5
ID=chr19:-:gene:1065648:1073989;children=UL_261;	UL_261	lincRNA	chr19	1065648	1073989	-	8342	6189	LAST	3	chr19	1065648	1071397	5750	182	3.16522	2.9407	37.195	exonized	TDR9	DNA	chr19	1066596	1066777	-	14.5
ID=chr19:-:gene:1065648:1073989;children=UL_261;	UL_261	lincRNA	chr19	1065648	1073989	-	8342	6189	LAST	3	chr19	1065648	1071397	5750	358	6.22609	5.78446	37.195	exonized	HE1_DR1	SINE/V	chr19	1067303	1067660	-	13.2
ID=chr19:-:gene:1065648:1073989;children=UL_261;	UL_261	lincRNA	chr19	1065648	1073989	-	8342	6189	LAST	3	chr19	1065648	1071397	5750	161	2.8	2.60139	37.195	exonized	HE1_DR1	SINE/V	chr19	1066435	1066595	+	13.2
ID=chr19:-:gene:1065648:1073989;children=UL_261;	UL_261	lincRNA	chr19	1065648	1073989	-	8342	6189	LAST	3	chr19	1065648	1071397	5750	165	2.86957	2.66602	37.195	exonized	HATN17_DR	DNA/hAT	chr19	1067271	1067435	-	14.2
ID=chr19:-:gene:1065648:1073989;children=UL_261;	UL_261	lincRNA	chr19	1065648	1073989	-	8342	6189	LAST	3	chr19	1065648	1071397	5750	80	1.3913	1.29262	37.195	exonized	DNA8-1_DR	DNA/hAT-Ac	chr19	1069768	1069847	+	16.4
ID=chr19:-:gene:1065648:1073989;children=UL_261;	UL_261	lincRNA	chr19	1065648	1073989	-	8342	6189	LAST	3	chr19	1065648	1071397	5750	55	0.956522	0.888673	37.195	exonized	DNA8-1_DR	DNA/hAT-Ac	chr19	1069608	1069662	+	16.4
ID=chr19:-:gene:1065648:1073989;children=UL_261;	UL_261	lincRNA	chr19	1065648	1073989	-	8342	6189	LAST	3	chr19	1065648	1071397	5750	55	0.956522	0.888673	37.195	exonized	DNA8-1_DR	DNA/hAT-Ac	chr19	1069511	1069565	+	16.4
ID=chr19:-:gene:1065648:1073989;children=UL_261;	UL_261	lincRNA	chr19	1065648	1073989	-	8342	6189	LAST	3	chr19	1065648	1071397	5750	69	1.2	1.11488	37.195	exonized	DNA8-1_DR	DNA/hAT-Ac	chr19	1069409	1069477	+	16.4
ID=chr19:-:gene:1065648:1073989;children=UL_261;	UL_261	lincRNA	chr19	1065648	1073989	-	8342	6189	LAST	3	chr19	1065648	1071397	5750	67	1.16522	1.08257	37.195	exonized	DNA8-1_DR	DNA/hAT-Ac	chr19	1069246	1069312	+	16.4
ID=chr19:-:gene:1065648:1073989;children=UL_261;	UL_261	lincRNA	chr19	1065648	1073989	-	8342	6189	LAST	3	chr19	1065648	1071397	5750	47	0.817391	0.759412	37.195	exonized	DNA8-1_DR	DNA/hAT-Ac	chr19	1069152	1069198	+	16.4
ID=chr19:-:gene:1065648:1073989;children=UL_261;	UL_261	lincRNA	chr19	1065648	1073989	-	8342	6189	LAST	3	chr19	1065648	1071397	5750	48	0.834783	0.77557	37.195	exonized	DNA8-1_DR	DNA/hAT-Ac	chr19	1069098	1069145	+	16.4
ID=chr19:-:gene:1065648:1073989;children=UL_261;	UL_261	lincRNA	chr19	1065648	1073989	-	8342	6189	LAST	3	chr19	1065648	1071397	5750	48	0.834783	0.77557	37.195	exonized	DNA8-1_DR	DNA/hAT-Ac	chr19	1069044	1069091	+	16.4
ID=chr19:-:gene:1065648:1073989;children=UL_261;	UL_261	lincRNA	chr19	1065648	1073989	-	8342	6189	LAST	3	chr19	1065648	1071397	5750	56	0.973913	0.904831	37.195	exonized	DNA8-1_DR	DNA/hAT-Ac	chr19	1068876	1068931	+	16.4
ID=chr19:-:gene:1065648:1073989;children=UL_261;	UL_261	lincRNA	chr19	1065648	1073989	-	8342	6189	LAST	3	chr19	1065648	1071397	5750	45	0.782609	0.727096	37.195	exonized	DNA8-1_DR	DNA/hAT-Ac	chr19	1068781	1068825	+	16.4
ID=chr19:-:gene:1065648:1073989;children=UL_261;	UL_261	lincRNA	chr19	1065648	1073989	-	8342	6189	LAST	3	chr19	1065648	1071397	5750	52	0.904348	0.8402	37.195	exonized	DNA8-1_DR	DNA/hAT-Ac	chr19	1068723	1068774	+	16.4
ID=chr19:-:gene:1065648:1073989;children=UL_261;	UL_261	lincRNA	chr19	1065648	1073989	-	8342	6189	LAST	3	chr19	1065648	1071397	5750	48	0.834783	0.77557	37.195	exonized	DNA8-1_DR	DNA/hAT-Ac	chr19	1068673	1068720	+	16.4
ID=chr19:-:gene:1065648:1073989;children=UL_261;	UL_261	lincRNA	chr19	1065648	1073989	-	8342	6189	LAST	3	chr19	1065648	1071397	5750	141	2.45217	2.27824	37.195	exonized	DNA-X-6_DR	DNA	chr19	1069769	1069909	+	16.3
ID=chr19:-:gene:1065648:1073989;children=UL_261;	UL_261	lincRNA	chr19	1065648	1073989	-	8342	6189	LAST	3	chr19	1065648	1071397	5750	158	2.74783	2.55292	37.195	exonized	DNA-8-14_DR	DNA/hAT-Charlie	chr19	1065981	1066138	+	11.4
ID=chr19:-:gene:1065648:1073989;children=UL_261;	UL_261	lincRNA	chr19	1065648	1073989	-	8342	6189	LAST	3	chr19	1065648	1071397	5750	40	0.695652	0.646308	37.195	exonized	DNA-5-8_DR	DNA	chr19	1069717	1069756	-	17.2
ID=chr19:-:gene:1065648:1073989;children=UL_261;	UL_261	lincRNA	chr19	1065648	1073989	-	8342	6189	LAST	3	chr19	1065648	1071397	5750	41	0.713043	0.662466	37.195	exonized	DNA-5-8_DR	DNA	chr19	1069362	1069402	-	17.2
ID=chr19:-:gene:1065648:1073989;children=UL_261;	UL_261	lincRNA	chr19	1065648	1073989	-	8342	6189	LAST	3	chr19	1065648	1071397	5750	41	0.713043	0.662466	37.195	exonized	DNA-5-8_DR	DNA	chr19	1069211	1069251	-	17.2
ID=chr19:-:gene:1065648:1073989;children=UL_261;	UL_261	lincRNA	chr19	1065648	1073989	-	8342	6189	LAST	3	chr19	1065648	1071397	5750	62	1.07826	1.00178	37.195	exonized	DNA-5-8_DR	DNA	chr19	1069030	1069091	-	17.2
ID=chr19:-:gene:1065648:1073989;children=UL_261;	UL_261	lincRNA	chr19	1065648	1073989	-	8342	6189	LAST	3	chr19	1065648	1071397	5750	41	0.713043	0.662466	37.195	exonized	DNA-5-8_DR	DNA	chr19	1068945	1068985	-	17.2
ID=chr19:-:gene:174938:177497;children=UL_260;	UL_260	lincRNA	chr19	174938	177497	-	2560	2560	SINGLE	1	chr19	174938	177497	2560	97	3.78906	3.78906	10.7031	TSS	TC1DR3	DNA/TcMar-Tc1	chr19	177401	177972	-	10.4
ID=chr19:-:gene:174938:177497;children=UL_260;	UL_260	lincRNA	chr19	174938	177497	-	2560	2560	SINGLE	1	chr19	174938	177497	2560	177	6.91406	6.91406	10.7031	exonized	ERV1-N3-I_DR-int	LTR	chr19	176370	176546	-	20.3
ID=chr19:-:gene:18976302:18978082;children=UL_263;	UL_263	lincRNA	chr19	18976302	18978082	-	1781	1781	SINGLE	1	chr19	18976302	18978082	1781	264	14.8231	14.8231	14.8231	exonized	ANGEL	DNA/hAT	chr19	18976930	18977193	+	17.6
ID=chr19:-:gene:20272403:20274583;children=Zv9_00044522;	Zv9_00044522	lincRNA	chr19	20272403	20274583	-	2181	1256	FIRST	1	chr19	20274536	20274583	48	48	100	3.82166	20.4618	TSS_SPL	DNA-2-12_DR	DNA/En-Spm?	chr19	20274182	20274644	+	16.6
ID=chr19:-:gene:20272403:20274583;children=Zv9_00044522;	Zv9_00044522	lincRNA	chr19	20272403	20274583	-	2181	1256	MIDDLE	2	chr19	20274202	20274243	42	42	100	3.34395	20.4618	Both_SPL	DNA-2-12_DR	DNA/En-Spm?	chr19	20274182	20274644	+	16.6
ID=chr19:-:gene:20272403:20274583;children=Zv9_00044522;	Zv9_00044522	lincRNA	chr19	20272403	20274583	-	2181	1256	LAST	4	chr19	20272403	20273473	1071	55	5.13539	4.37898	20.4618	exonized	Mariner-N5_DR	DNA/TcMar	chr19	20273264	20273318	-	15.1
ID=chr19:-:gene:20272403:20274583;children=Zv9_00044522;	Zv9_00044522	lincRNA	chr19	20272403	20274583	-	2181	1256	LAST	4	chr19	20272403	20273473	1071	112	10.4575	8.9172	20.4618	exonized	DNA-1-4_DR	DNA	chr19	20273184	20273295	-	13.2
ID=chr19:-:gene:20674253:20681464;children=Zv9_00044534;	Zv9_00044534	lincRNA	chr19	20674253	20681464	-	7212	5701	LAST	2	chr19	20674253	20679771	5519	164	2.97155	2.87669	51.8506	exonized	Tc1N1_DR	DNA/En-Spm?	chr19	20677929	20678092	+	13.9
ID=chr19:-:gene:20674253:20681464;children=Zv9_00044534;	Zv9_00044534	lincRNA	chr19	20674253	20681464	-	7212	5701	LAST	2	chr19	20674253	20679771	5519	50	0.905961	0.877039	51.8506	exonized	Tc1N1_DR	DNA/En-Spm?	chr19	20677328	20677377	+	13.9
ID=chr19:-:gene:20674253:20681464;children=Zv9_00044534;	Zv9_00044534	lincRNA	chr19	20674253	20681464	-	7212	5701	LAST	2	chr19	20674253	20679771	5519	547	9.91122	9.59481	51.8506	exonized	TDR18	DNA/hAT-Charlie	chr19	20678093	20678639	-	10.6
ID=chr19:-:gene:20674253:20681464;children=Zv9_00044534;	Zv9_00044534	lincRNA	chr19	20674253	20681464	-	7212	5701	LAST	2	chr19	20674253	20679771	5519	394	7.13897	6.91107	51.8506	exonized	TDR18	DNA/hAT-Charlie	chr19	20675818	20676211	+	10.6
ID=chr19:-:gene:20674253:20681464;children=Zv9_00044534;	Zv9_00044534	lincRNA	chr19	20674253	20681464	-	7212	5701	LAST	2	chr19	20674253	20679771	5519	167	3.02591	2.92931	51.8506	exonized	TDR12	DNA	chr19	20674353	20674519	+	10.6
ID=chr19:-:gene:20674253:20681464;children=Zv9_00044534;	Zv9_00044534	lincRNA	chr19	20674253	20681464	-	7212	5701	LAST	2	chr19	20674253	20679771	5519	71	1.28646	1.2454	51.8506	exonized	Polinton-2N1_DR	DNA/Maverick	chr19	20676616	20676686	+	18
ID=chr19:-:gene:20674253:20681464;children=Zv9_00044534;	Zv9_00044534	lincRNA	chr19	20674253	20681464	-	7212	5701	LAST	2	chr19	20674253	20679771	5519	52	0.9422	0.912121	51.8506	exonized	Polinton-2N1_DR	DNA/Maverick	chr19	20675005	20675056	+	18
ID=chr19:-:gene:20674253:20681464;children=Zv9_00044534;	Zv9_00044534	lincRNA	chr19	20674253	20681464	-	7212	5701	LAST	2	chr19	20674253	20679771	5519	57	1.0328	0.999825	51.8506	exonized	Helitron-N3_DR	DNA/Helitron	chr19	20678770	20678826	+	14.5
ID=chr19:-:gene:20674253:20681464;children=Zv9_00044534;	Zv9_00044534	lincRNA	chr19	20674253	20681464	-	7212	5701	LAST	2	chr19	20674253	20679771	5519	51	0.92408	0.89458	51.8506	exonized	Helitron-N3_DR	DNA/Helitron	chr19	20678768	20678818	-	14.5
ID=chr19:-:gene:20674253:20681464;children=Zv9_00044534;	Zv9_00044534	lincRNA	chr19	20674253	20681464	-	7212	5701	LAST	2	chr19	20674253	20679771	5519	422	7.64631	7.40221	51.8506	exonized	HATN10_DR	DNA/hAT	chr19	20677487	20677908	+	12.3
ID=chr19:-:gene:20674253:20681464;children=Zv9_00044534;	Zv9_00044534	lincRNA	chr19	20674253	20681464	-	7212	5701	LAST	2	chr19	20674253	20679771	5519	205	3.71444	3.59586	51.8506	exonized	HATN10_DR	DNA/hAT	chr19	20675496	20675700	+	12.3
ID=chr19:-:gene:20674253:20681464;children=Zv9_00044534;	Zv9_00044534	lincRNA	chr19	20674253	20681464	-	7212	5701	LAST	2	chr19	20674253	20679771	5519	122	2.21055	2.13998	51.8506	exonized	HATN10_DR	DNA/hAT	chr19	20675311	20675432	+	12.3
ID=chr19:-:gene:20674253:20681464;children=Zv9_00044534;	Zv9_00044534	lincRNA	chr19	20674253	20681464	-	7212	5701	LAST	2	chr19	20674253	20679771	5519	206	3.73256	3.6134	51.8506	exonized	EnSpm-N4_DR	DNA/En-Spm?	chr19	20675102	20675307	+	14.2
ID=chr19:-:gene:20674253:20681464;children=Zv9_00044534;	Zv9_00044534	lincRNA	chr19	20674253	20681464	-	7212	5701	LAST	2	chr19	20674253	20679771	5519	117	2.11995	2.05227	51.8506	exonized	DNA11TA1_DR	DNA/TcMar-Tc1	chr19	20678640	20678756	+	14.2
ID=chr19:-:gene:20674253:20681464;children=Zv9_00044534;	Zv9_00044534	lincRNA	chr19	20674253	20681464	-	7212	5701	LAST	2	chr19	20674253	20679771	5519	79	1.43142	1.38572	51.8506	exonized	DNA11TA1_DR	DNA/TcMar-Tc1	chr19	20676402	20676480	+	14.2
ID=chr19:-:gene:20674253:20681464;children=Zv9_00044534;	Zv9_00044534	lincRNA	chr19	20674253	20681464	-	7212	5701	LAST	2	chr19	20674253	20679771	5519	117	2.11995	2.05227	51.8506	exonized	DNA11TA1_DR	DNA/TcMar-Tc1	chr19	20675701	20675817	-	14.2
ID=chr19:-:gene:20674253:20681464;children=Zv9_00044534;	Zv9_00044534	lincRNA	chr19	20674253	20681464	-	7212	5701	LAST	2	chr19	20674253	20679771	5519	135	2.4461	2.36801	51.8506	exonized	CR1-23_DR	LINE/Rex-Babar	chr19	20676477	20676611	+	12.8
ID=chr19:-:gene:2184534:2186636;children=Zv9_00044103;	Zv9_00044103	lincRNA	chr19	2184534	2186636	-	2103	1225	FIRST	1	chr19	2186087	2186636	550	89	16.1818	7.26531	7.26531	TSS	DNA2-3_DR	DNA/hAT?	chr19	2186548	2187740	-	12
ID=chr19:-:gene:27949595:27956054;children=Zv9_00044653,Zv9_00044652,Zv9_00044654,Zv9_00044651,Zv9_00044650;	Zv9_00044653	lincRNA	chr19	27949599	27956054	-	6456	2989	FIRST	1	chr19	27954550	27956054	1505	87	5.78073	2.91067	14.7876	exonized	ERV1-N1-I_DR-int	LTR/ERV1	chr19	27955593	27955679	+	17.1
ID=chr19:-:gene:27949595:27956054;children=Zv9_00044653,Zv9_00044652,Zv9_00044654,Zv9_00044651,Zv9_00044650;	Zv9_00044653	lincRNA	chr19	27949599	27956054	-	6456	2989	FIRST	1	chr19	27954550	27956054	1505	355	23.588	11.8769	14.7876	TSS	CR1-27_DR	LINE/L2	chr19	27955700	27956195	+	10.1
ID=chr19:-:gene:27949595:27956054;children=Zv9_00044653,Zv9_00044652,Zv9_00044654,Zv9_00044651,Zv9_00044650;	Zv9_00044654	lincRNA	chr19	27949599	27956054	-	6456	2177	FIRST	1	chr19	27954550	27956054	1505	87	5.78073	3.99633	20.3032	exonized	ERV1-N1-I_DR-int	LTR/ERV1	chr19	27955593	27955679	+	17.1
ID=chr19:-:gene:27949595:27956054;children=Zv9_00044653,Zv9_00044652,Zv9_00044654,Zv9_00044651,Zv9_00044650;	Zv9_00044654	lincRNA	chr19	27949599	27956054	-	6456	2177	FIRST	1	chr19	27954550	27956054	1505	355	23.588	16.3068	20.3032	TSS	CR1-27_DR	LINE/L2	chr19	27955700	27956195	+	10.1
ID=chr19:-:gene:29163944:29266084;children=Zv9_00044678,Zv9_00044679;	Zv9_00044678	lincRNA	chr19	29163944	29266084	-	102141	1775	LAST	4	chr19	29163944	29165231	1288	195	15.1398	10.9859	10.9859	exonized	ANGEL	DNA/hAT	chr19	29164702	29164896	+	17.6
ID=chr19:-:gene:29163944:29266084;children=Zv9_00044678,Zv9_00044679;	Zv9_00044679	lincRNA	chr19	29163944	29266084	-	102141	1855	LAST	5	chr19	29163944	29165231	1288	195	15.1398	10.5121	10.5121	exonized	ANGEL	DNA/hAT	chr19	29164702	29164896	+	17.6
ID=chr19:-:gene:42418867:42440484;children=Zv9_00044895;	Zv9_00044895	lincRNA	chr19	42418867	42440484	-	21618	1560	LAST	2	chr19	42418867	42420238	1372	413	30.102	26.4744	26.4744	exonized	LOOPERN3_DR	DNA/PiggyBac	chr19	42419161	42419573	-	15.3
ID=chr19:-:gene:44564990:44586582;children=Zv9_00044934;	Zv9_00044934	lincRNA	chr19	44564990	44586582	-	21593	505	LAST	2	chr19	44564990	44565467	478	57	11.9247	11.2871	19.802	PolyA	SINE_DR1	SINE	chr19	44564985	44565046	-	13.1
ID=chr19:-:gene:44564990:44586582;children=Zv9_00044934;	Zv9_00044934	lincRNA	chr19	44564990	44586582	-	21593	505	LAST	2	chr19	44564990	44565467	478	26	5.43933	5.14851	19.802	exonized	DNA-2-1_DR	DNA	chr19	44565047	44565072	-	16.1
ID=chr19:-:gene:44564990:44586582;children=Zv9_00044934;	Zv9_00044934	lincRNA	chr19	44564990	44586582	-	21593	505	LAST	2	chr19	44564990	44565467	478	17	3.55649	3.36634	19.802	exonized	CR1-33_DR	LINE/L2	chr19	44565047	44565063	-	15.9
ID=chr19:-:gene:47706862:47709567;children=Zv9_00045003,Zv9_00045002;	Zv9_00045003	lincRNA	chr19	47707692	47709567	-	1876	898	FIRST	1	chr19	47708721	47709567	847	40	4.72255	4.45434	31.4031	TSS	DNA11TA1_DR	DNA/TcMar-Tc1	chr19	47709528	47709597	+	14.2
ID=chr19:-:gene:47706862:47709567;children=Zv9_00045003,Zv9_00045002;	Zv9_00045003	lincRNA	chr19	47707692	47709567	-	1876	898	FIRST	1	chr19	47708721	47709567	847	81	9.56316	9.02004	31.4031	exonized	DNA11TA1_DR	DNA/TcMar-Tc1	chr19	47708975	47709055	-	14.2
ID=chr19:-:gene:47706862:47709567;children=Zv9_00045003,Zv9_00045002;	Zv9_00045003	lincRNA	chr19	47707692	47709567	-	1876	898	FIRST	1	chr19	47708721	47709567	847	161	19.0083	17.9287	31.4031	exonized	DNA11TA1_DR	DNA/TcMar-Tc1	chr19	47708879	47709039	+	14.2
ID=chr19:-:gene:49920342:49938062;children=UL_276;	UL_276	lincRNA	chr19	49920342	49938062	-	17721	5660	LAST	19	chr19	49920342	49921587	1246	106	8.50722	1.87279	5.53004	exonized	ERV1-N3-I_DR-int	LTR	chr19	49921158	49921263	-	20.3
ID=chr19:-:gene:49920342:49938062;children=UL_276;	UL_276	lincRNA	chr19	49920342	49938062	-	17721	5660	LAST	19	chr19	49920342	49921587	1246	80	6.42055	1.41343	5.53004	exonized	ERV1-N3-I_DR-int	LTR	chr19	49920951	49921030	-	20.3
ID=chr19:-:gene:49920342:49938062;children=UL_276;	UL_276	lincRNA	chr19	49920342	49938062	-	17721	5660	LAST	19	chr19	49920342	49921587	1246	127	10.1926	2.24382	5.53004	exonized	ENSPM-6_DR	DNA/En-Spm	chr19	49921031	49921157	-	17.5
ID=chr19:-:gene:5713619:5716821;children=Zv9_00044181;	Zv9_00044181	lincRNA	chr19	5713619	5716821	-	3203	1601	FIRST	1	chr19	5715629	5716821	1193	28	2.34702	1.74891	54.2786	TSS	hAT-N51_DR	DNA/hAT-Ac	chr19	5716794	5716847	+	11.6
ID=chr19:-:gene:5713619:5716821;children=Zv9_00044181;	Zv9_00044181	lincRNA	chr19	5713619	5716821	-	3203	1601	FIRST	1	chr19	5715629	5716821	1193	256	21.4585	15.99	54.2786	exonized	hAT-N51_DR	DNA/hAT-Ac	chr19	5716380	5716635	+	11.6
ID=chr19:-:gene:5713619:5716821;children=Zv9_00044181;	Zv9_00044181	lincRNA	chr19	5713619	5716821	-	3203	1601	FIRST	1	chr19	5715629	5716821	1193	264	22.1291	16.4897	54.2786	exonized	hAT-N51_DR	DNA/hAT-Ac	chr19	5715959	5716222	+	11.6
ID=chr19:-:gene:5713619:5716821;children=Zv9_00044181;	Zv9_00044181	lincRNA	chr19	5713619	5716821	-	3203	1601	FIRST	1	chr19	5715629	5716821	1193	112	9.3881	6.99563	54.2786	exonized	MuDR-N1_DR	DNA/MuDR	chr19	5716674	5716785	+	10.9
ID=chr19:-:gene:5713619:5716821;children=Zv9_00044181;	Zv9_00044181	lincRNA	chr19	5713619	5716821	-	3203	1601	FIRST	1	chr19	5715629	5716821	1193	111	9.30427	6.93317	54.2786	exonized	MuDR-N1_DR	DNA/MuDR	chr19	5716261	5716371	+	10.9
ID=chr19:-:gene:5713619:5716821;children=Zv9_00044181;	Zv9_00044181	lincRNA	chr19	5713619	5716821	-	3203	1601	LAST	2	chr19	5713619	5714026	408	98	24.0196	6.12117	54.2786	PolyA	Kolobok-N6_DR	DNA/Kolobok?	chr19	5713540	5713716	+	11.9
ID=chr19:+:gene:25408196:25420544;children=Zv9_00043518;	Zv9_00043518	lincRNA	chr19	25408196	25420544	+	12349	1989	FIRST	1	chr19	25408196	25408712	517	144	27.853	7.23982	38.914	exonized	ERV1-N6-LTR_DR	LTR	chr19	25408526	25408669	+	13.5
ID=chr19:+:gene:25408196:25420544;children=Zv9_00043518;	Zv9_00043518	lincRNA	chr19	25408196	25420544	+	12349	1989	FIRST	1	chr19	25408196	25408712	517	84	16.2476	4.22323	38.914	TSS	ERV1-N6-LTR_DR	LTR	chr19	25408171	25408279	+	13.5
ID=chr19:+:gene:25408196:25420544;children=Zv9_00043518;	Zv9_00043518	lincRNA	chr19	25408196	25420544	+	12349	1989	FIRST	1	chr19	25408196	25408712	517	42	8.12379	2.11161	38.914	SPL	ERV1-N6-I_DR-int	LTR	chr19	25408671	25409093	+	18.7
ID=chr19:+:gene:25408196:25420544;children=Zv9_00043518;	Zv9_00043518	lincRNA	chr19	25408196	25420544	+	12349	1989	LAST	2	chr19	25419073	25420544	1472	109	7.40489	5.48014	38.914	exonized	ERV1-N6-LTR_DR	LTR	chr19	25420388	25420496	+	13.5
ID=chr19:+:gene:25408196:25420544;children=Zv9_00043518;	Zv9_00043518	lincRNA	chr19	25408196	25420544	+	12349	1989	LAST	2	chr19	25419073	25420544	1472	222	15.0815	11.1614	38.914	exonized	ERV1-N6-I_DR-int	LTR	chr19	25420166	25420387	+	18.7
ID=chr19:+:gene:25408196:25420544;children=Zv9_00043518;	Zv9_00043518	lincRNA	chr19	25408196	25420544	+	12349	1989	LAST	2	chr19	25419073	25420544	1472	173	11.7527	8.69784	38.914	exonized	ERV1-N1-I_DR-int	LTR/ERV1	chr19	25420215	25420387	+	17.1
ID=chr19:+:gene:29288190:29309083;children=UL_270,UL_271;	UL_271	lincRNA	chr19	29288190	29309083	+	20894	4104	LAST	5	chr19	29306246	29309083	2838	435	15.3277	10.5994	28.0214	exonized	Kolobok-N5_DR	DNA/Kolobok?	chr19	29307093	29307527	-	14.6
ID=chr19:+:gene:29288190:29309083;children=UL_270,UL_271;	UL_271	lincRNA	chr19	29288190	29309083	+	20894	4104	LAST	5	chr19	29306246	29309083	2838	417	14.6934	10.1608	28.0214	exonized	DNA-2-4_DR	DNA	chr19	29307581	29307997	-	16.1
ID=chr19:+:gene:29288190:29309083;children=UL_270,UL_271;	UL_271	lincRNA	chr19	29288190	29309083	+	20894	4104	LAST	5	chr19	29306246	29309083	2838	298	10.5004	7.26121	28.0214	exonized	ANGEL	DNA/hAT	chr19	29308636	29308933	-	17.6
ID=chr19:+:gene:36909840:36911950;children=UL_272;	UL_272	lincRNA	chr19	36909840	36911950	+	2111	2111	SINGLE	1	chr19	36909840	36911950	2111	53	2.51066	2.51066	2.51066	exonized	L1-10_DR	LINE/L1	chr19	36911274	36911326	+	27
ID=chr19:+:gene:47021918:47022993;children=UL_275;	UL_275	lincRNA	chr19	47021918	47022993	+	1076	1076	SINGLE	1	chr19	47021918	47022993	1076	97	9.01487	9.01487	16.3569	exonized	ENSPM-6_DR	DNA/En-Spm	chr19	47022410	47022506	-	17.5
ID=chr19:+:gene:47021918:47022993;children=UL_275;	UL_275	lincRNA	chr19	47021918	47022993	+	1076	1076	SINGLE	1	chr19	47021918	47022993	1076	79	7.34201	7.34201	16.3569	exonized	ENSPM-6_DR	DNA/En-Spm	chr19	47022400	47022478	+	17.5
ID=chr19:+:gene:49979445:49989089;children=UL_277;	UL_277	lincRNA	chr19	49979445	49989089	+	9645	5113	LAST	2	chr19	49984139	49989089	4951	107	2.16118	2.0927	7.90143	exonized	Tc1N1_DR	DNA/En-Spm?	chr19	49988361	49988467	-	13.9
ID=chr19:+:gene:49979445:49989089;children=UL_277;	UL_277	lincRNA	chr19	49979445	49989089	+	9645	5113	LAST	2	chr19	49984139	49989089	4951	50	1.0099	0.977899	7.90143	exonized	EnSpm-5_DR	DNA/En-Spm	chr19	49987365	49987414	-	19
ID=chr19:+:gene:49979445:49989089;children=UL_277;	UL_277	lincRNA	chr19	49979445	49989089	+	9645	5113	LAST	2	chr19	49984139	49989089	4951	66	1.33306	1.29083	7.90143	exonized	DNA-2-29_DR	DNA	chr19	49987339	49987404	-	13.9
ID=chr19:+:gene:49979445:49989089;children=UL_277;	UL_277	lincRNA	chr19	49979445	49989089	+	9645	5113	LAST	2	chr19	49984139	49989089	4951	71	1.43405	1.38862	7.90143	exonized	CR1-5_DR	LINE/L2	chr19	49988008	49988078	+	12.2
ID=chr19:+:gene:49979445:49989089;children=UL_277;	UL_277	lincRNA	chr19	49979445	49989089	+	9645	5113	LAST	2	chr19	49984139	49989089	4951	110	2.22177	2.15138	7.90143	exonized	ANGEL	DNA/hAT	chr19	49986323	49986432	-	17.6
ID=chr19:+:gene:5927756:5935674;children=UL_262;	UL_262	lincRNA	chr19	5927756	5935674	+	7919	7919	SINGLE	1	chr19	5927756	5935674	7919	29	0.366208	0.366208	35.7621	exonized	hAT-N66B_DR	DNA/hAT-Charlie	chr19	5933284	5933312	+	10.7
ID=chr19:+:gene:5927756:5935674;children=UL_262;	UL_262	lincRNA	chr19	5927756	5935674	+	7919	7919	SINGLE	1	chr19	5927756	5935674	7919	124	1.56585	1.56585	35.7621	exonized	hAT-N66B_DR	DNA/hAT-Charlie	chr19	5932750	5932873	+	10.7
ID=chr19:+:gene:5927756:5935674;children=UL_262;	UL_262	lincRNA	chr19	5927756	5935674	+	7919	7919	SINGLE	1	chr19	5927756	5935674	7919	597	7.53883	7.53883	35.7621	exonized	TDR2	DNA/TcMar-Tc1	chr19	5933913	5934509	+	8.1
ID=chr19:+:gene:5927756:5935674;children=UL_262;	UL_262	lincRNA	chr19	5927756	5935674	+	7919	7919	SINGLE	1	chr19	5927756	5935674	7919	125	1.57848	1.57848	35.7621	exonized	Looper-N8_DR	DNA/Kolobok	chr19	5932039	5932163	+	7.7
ID=chr19:+:gene:5927756:5935674;children=UL_262;	UL_262	lincRNA	chr19	5927756	5935674	+	7919	7919	SINGLE	1	chr19	5927756	5935674	7919	56	0.70716	0.70716	35.7621	exonized	IS4EU-2_DR	DNA/Kolobok-IS4EU	chr19	5932324	5932379	-	20.5
ID=chr19:+:gene:5927756:5935674;children=UL_262;	UL_262	lincRNA	chr19	5927756	5935674	+	7919	7919	SINGLE	1	chr19	5927756	5935674	7919	453	5.72042	5.72042	35.7621	exonized	HarbingerN7_DR	DNA/Harbinger	chr19	5931694	5932146	-	16.2
ID=chr19:+:gene:5927756:5935674;children=UL_262;	UL_262	lincRNA	chr19	5927756	5935674	+	7919	7919	SINGLE	1	chr19	5927756	5935674	7919	382	4.82384	4.82384	35.7621	exonized	HarbingerN6_DR	DNA/Harbinger	chr19	5932887	5933268	-	14.9
ID=chr19:+:gene:5927756:5935674;children=UL_262;	UL_262	lincRNA	chr19	5927756	5935674	+	7919	7919	SINGLE	1	chr19	5927756	5935674	7919	69	0.871322	0.871322	35.7621	exonized	HarbingerN2_DR	DNA/Harbinger	chr19	5933777	5933845	+	11.7
ID=chr19:+:gene:5927756:5935674;children=UL_262;	UL_262	lincRNA	chr19	5927756	5935674	+	7919	7919	SINGLE	1	chr19	5927756	5935674	7919	550	6.94532	6.94532	35.7621	TSS	HarbingerN1_DR	DNA/Harbinger	chr19	5927663	5928305	-	13.9
ID=chr19:+:gene:5927756:5935674;children=UL_262;	UL_262	lincRNA	chr19	5927756	5935674	+	7919	7919	SINGLE	1	chr19	5927756	5935674	7919	447	5.64465	5.64465	35.7621	exonized	EXPANDER1_DR	LINE/RTE	chr19	5928502	5928948	+	12.1
ID=chr2:-:gene:22542283:22544993;children=Zv9_00004390;	Zv9_00004390	lincRNA	chr2	22542283	22544993	-	2711	1000	FIRST	1	chr2	22544568	22544993	426	426	100	42.6	49.1	TSS_SPL	LTR5_DR	LTR	chr2	22543972	22545481	-	16.7
ID=chr2:-:gene:22542283:22544993;children=Zv9_00004390;	Zv9_00004390	lincRNA	chr2	22542283	22544993	-	2711	1000	LAST	2	chr2	22542283	22542856	574	65	11.324	6.5	49.1	PolyA	DNA-X-2_DR	DNA	chr2	22541555	22542347	+	14.2
ID=chr2:-:gene:32755252:32759539;children=Zv9_00004625;	Zv9_00004625	lincRNA	chr2	32755252	32759539	-	4288	2011	LAST	2	chr2	32755252	32756557	1306	116	8.88208	5.76827	5.76827	exonized	ANGEL	DNA/hAT	chr2	32755772	32755887	-	17.6
ID=chr2:-:gene:35450084:35454552;children=Zv9_00004647;	Zv9_00004647	lincRNA	chr2	35450084	35454552	-	4469	323	LAST	3	chr2	35450084	35450123	40	21	52.5	6.50155	6.50155	PolyA	DNA-2-20_DR	DNA/En-Spm?	chr2	35450068	35450104	-	19.3
ID=chr2:-:gene:37534675:37536136;children=Zv9_00004700,Zv9_00004701;	Zv9_00004700	lincRNA	chr2	37534675	37536136	-	1462	1140	LAST	2	chr2	37534675	37535418	744	253	34.0054	22.193	22.193	exonized	Kolobok-N4_DR	DNA/Kolobok	chr2	37535056	37535308	+	18.7
ID=chr2:-:gene:3906371:3910502;children=Zv9_00004027;	Zv9_00004027	lincRNA	chr2	3906371	3910502	-	4132	3387	FIRST	1	chr2	3907538	3910502	2965	301	10.1518	8.88692	56.5102	exonized	hAT-N64_DR	DNA/hAT?	chr2	3909599	3909899	+	11.7
ID=chr2:-:gene:3906371:3910502;children=Zv9_00004027;	Zv9_00004027	lincRNA	chr2	3906371	3910502	-	4132	3387	FIRST	1	chr2	3907538	3910502	2965	591	19.9325	17.4491	56.5102	exonized	TDR8B	DNA/hAT?	chr2	3909012	3909602	-	12.3
ID=chr2:-:gene:3906371:3910502;children=Zv9_00004027;	Zv9_00004027	lincRNA	chr2	3906371	3910502	-	4132	3387	FIRST	1	chr2	3907538	3910502	2965	467	15.7504	13.788	56.5102	exonized	DNA8-3_DR	DNA	chr2	3909975	3910441	-	13.4
ID=chr2:-:gene:3906371:3910502;children=Zv9_00004027;	Zv9_00004027	lincRNA	chr2	3906371	3910502	-	4132	3387	FIRST	1	chr2	3907538	3910502	2965	397	13.3895	11.7213	56.5102	exonized	DNA25TWA1_DR	DNA	chr2	3908582	3908978	-	14.4
ID=chr2:-:gene:3906371:3910502;children=Zv9_00004027;	Zv9_00004027	lincRNA	chr2	3906371	3910502	-	4132	3387	FIRST	1	chr2	3907538	3910502	2965	92	3.10287	2.71627	56.5102	exonized	DNA25TWA1_DR	DNA	chr2	3908479	3908570	-	14.4
ID=chr2:-:gene:3906371:3910502;children=Zv9_00004027;	Zv9_00004027	lincRNA	chr2	3906371	3910502	-	4132	3387	LAST	2	chr2	3906371	3906792	422	66	15.6398	1.94863	56.5102	exonized	hAT-N50_DR	DNA/hAT-Ac	chr2	3906678	3906743	-	13.2
ID=chr2:-:gene:40375591:40464817;children=Zv9_00004785,Zv9_00004784;	Zv9_00004784	lincRNA	chr2	40375591	40464817	-	89227	1216	MIDDLE	4	chr2	40452417	40452525	109	109	100	8.96382	32.8947	Both_SPL	TDR13	DNA	chr2	40452261	40452720	+	15.4
ID=chr2:-:gene:40375591:40464817;children=Zv9_00004785,Zv9_00004784;	Zv9_00004784	lincRNA	chr2	40375591	40464817	-	89227	1216	LAST	6	chr2	40375591	40376152	562	82	14.5907	6.74342	32.8947	exonized	TDR8B	DNA/hAT?	chr2	40375753	40375834	+	12.3
ID=chr2:-:gene:40375591:40464817;children=Zv9_00004785,Zv9_00004784;	Zv9_00004784	lincRNA	chr2	40375591	40464817	-	89227	1216	LAST	6	chr2	40375591	40376152	562	59	10.4982	4.85197	32.8947	PolyA	TDR8	DNA	chr2	40375499	40375649	+	13.3
ID=chr2:-:gene:40375591:40464817;children=Zv9_00004785,Zv9_00004784;	Zv9_00004784	lincRNA	chr2	40375591	40464817	-	89227	1216	LAST	6	chr2	40375591	40376152	562	150	26.6904	12.3355	32.8947	exonized	Mariner-N5_DR	DNA/TcMar	chr2	40375598	40375747	-	15.1
ID=chr2:-:gene:40375591:40464817;children=Zv9_00004785,Zv9_00004784;	Zv9_00004785	lincRNA	chr2	40391996	40464793	-	72798	1440	MIDDLE	4	chr2	40452417	40452525	109	109	100	7.56944	50.9028	Both_SPL	TDR13	DNA	chr2	40452261	40452720	+	15.4
ID=chr2:-:gene:40375591:40464817;children=Zv9_00004785,Zv9_00004784;	Zv9_00004785	lincRNA	chr2	40391996	40464793	-	72798	1440	LAST	5	chr2	40391996	40393051	1056	499	47.2538	34.6528	50.9028	exonized	TDR8B	DNA/hAT?	chr2	40392001	40392499	+	12.3
ID=chr2:-:gene:40375591:40464817;children=Zv9_00004785,Zv9_00004784;	Zv9_00004785	lincRNA	chr2	40391996	40464793	-	72798	1440	LAST	5	chr2	40391996	40393051	1056	125	11.8371	8.68056	50.9028	exonized	DNA-8-8_DR	DNA/hAT-Charlie	chr2	40392508	40392632	+	12.2
ID=chr2:-:gene:45487181:45495514;children=UL_292;	UL_292	lincRNA	chr2	45487181	45495514	-	8334	831	FIRST	1	chr2	45495423	45495514	92	11	11.9565	1.32371	4.45247	SPL	Kolobok-1_DR	DNA/Kolobok	chr2	45495395	45495433	+	16.7
ID=chr2:-:gene:45487181:45495514;children=UL_292;	UL_292	lincRNA	chr2	45487181	45495514	-	8334	831	FIRST	1	chr2	45495423	45495514	92	26	28.2609	3.12876	4.45247	TSS	DNA25TWA1_DR	DNA	chr2	45495489	45495803	-	14.4
ID=chr2:-:gene:52518154:52519271;children=UL_294;	UL_294	lincRNA	chr2	52518154	52519271	-	1118	1118	SINGLE	1	chr2	52518154	52519271	1118	269	24.0608	24.0608	24.0608	exonized	Kolobok-N4_DR	DNA/Kolobok	chr2	52518683	52518951	-	18.7
ID=chr2:-:gene:56273487:56308090;children=UL_296;	UL_296	lincRNA	chr2	56273487	56308090	-	34604	7653	LAST	3	chr2	56273487	56279532	6046	228	3.77109	2.97922	48.138	exonized	TDR12	DNA	chr2	56274214	56274441	-	10.6
ID=chr2:-:gene:56273487:56308090;children=UL_296;	UL_296	lincRNA	chr2	56273487	56308090	-	34604	7653	LAST	3	chr2	56273487	56279532	6046	463	7.65796	6.04992	48.138	exonized	TDR1	DNA/TcMar-Tc1	chr2	56274495	56274957	+	8.2
ID=chr2:-:gene:56273487:56308090;children=UL_296;	UL_296	lincRNA	chr2	56273487	56308090	-	34604	7653	LAST	3	chr2	56273487	56279532	6046	1177	19.4674	15.3796	48.138	exonized	LOOPERN1_DR	DNA/PiggyBac?	chr2	56277331	56278507	+	6.6
ID=chr2:-:gene:56273487:56308090;children=UL_296;	UL_296	lincRNA	chr2	56273487	56308090	-	34604	7653	LAST	3	chr2	56273487	56279532	6046	36	0.595435	0.470404	48.138	exonized	Kolobok-N7_DR	DNA/Kolobok	chr2	56277157	56277192	+	13.1
ID=chr2:-:gene:56273487:56308090;children=UL_296;	UL_296	lincRNA	chr2	56273487	56308090	-	34604	7653	LAST	3	chr2	56273487	56279532	6046	656	10.8501	8.5718	48.138	exonized	HarbingerN1_DR	DNA/Harbinger	chr2	56276145	56276800	-	13.9
ID=chr2:-:gene:56273487:56308090;children=UL_296;	UL_296	lincRNA	chr2	56273487	56308090	-	34604	7653	LAST	3	chr2	56273487	56279532	6046	265	4.38306	3.46269	48.138	exonized	DNA-8-24_DR	DNA/hAT?	chr2	56276889	56277153	+	17.2
ID=chr2:-:gene:56273487:56308090;children=UL_296;	UL_296	lincRNA	chr2	56273487	56308090	-	34604	7653	LAST	3	chr2	56273487	56279532	6046	110	1.81938	1.43734	48.138	exonized	DNA-8-14_DR	DNA/hAT-Charlie	chr2	56275770	56275879	-	11.4
ID=chr2:-:gene:56273487:56308090;children=UL_296;	UL_296	lincRNA	chr2	56273487	56308090	-	34604	7653	LAST	3	chr2	56273487	56279532	6046	622	10.2878	8.12753	48.138	exonized	DNA-1-5_DR	DNA	chr2	56278508	56279129	+	12
ID=chr2:-:gene:56273487:56308090;children=UL_296;	UL_296	lincRNA	chr2	56273487	56308090	-	34604	7653	LAST	3	chr2	56273487	56279532	6046	127	2.10056	1.65948	48.138	exonized	DNA-1-5_DR	DNA	chr2	56277204	56277330	+	12
ID=chr2:-:gene:56338264:56342456;children=UL_297;	UL_297	lincRNA	chr2	56338264	56342456	-	4193	4193	SINGLE	1	chr2	56338264	56342456	4193	334	7.96566	7.96566	29.5731	exonized	hAT-N51_DR	DNA/hAT-Ac	chr2	56341480	56341813	-	11.6
ID=chr2:-:gene:56338264:56342456;children=UL_297;	UL_297	lincRNA	chr2	56338264	56342456	-	4193	4193	SINGLE	1	chr2	56338264	56342456	4193	221	5.27069	5.27069	29.5731	exonized	TDR12	DNA	chr2	56341189	56341409	-	10.6
ID=chr2:-:gene:56338264:56342456;children=UL_297;	UL_297	lincRNA	chr2	56338264	56342456	-	4193	4193	SINGLE	1	chr2	56338264	56342456	4193	165	3.93513	3.93513	29.5731	exonized	Kolobok-N5_DR	DNA/Kolobok?	chr2	56341843	56342007	-	14.6
ID=chr2:-:gene:56338264:56342456;children=UL_297;	UL_297	lincRNA	chr2	56338264	56342456	-	4193	4193	SINGLE	1	chr2	56338264	56342456	4193	75	1.7887	1.7887	29.5731	exonized	DNA2-1_DR	DNA/TcMar?	chr2	56339623	56339697	+	15.7
ID=chr2:-:gene:56338264:56342456;children=UL_297;	UL_297	lincRNA	chr2	56338264	56342456	-	4193	4193	SINGLE	1	chr2	56338264	56342456	4193	114	2.71882	2.71882	29.5731	exonized	DNA-X-3_DR	DNA	chr2	56339614	56339727	+	15.6
ID=chr2:-:gene:56338264:56342456;children=UL_297;	UL_297	lincRNA	chr2	56338264	56342456	-	4193	4193	SINGLE	1	chr2	56338264	56342456	4193	92	2.19413	2.19413	29.5731	exonized	DNA-8-14_DR	DNA/hAT-Charlie	chr2	56339596	56339687	-	11.4
ID=chr2:-:gene:56338264:56342456;children=UL_297;	UL_297	lincRNA	chr2	56338264	56342456	-	4193	4193	SINGLE	1	chr2	56338264	56342456	4193	100	2.38493	2.38493	29.5731	exonized	ANGEL	DNA/hAT	chr2	56342006	56342105	-	17.6
ID=chr2:-:gene:56338264:56342456;children=UL_297;	UL_297	lincRNA	chr2	56338264	56342456	-	4193	4193	SINGLE	1	chr2	56338264	56342456	4193	69	1.6456	1.6456	29.5731	exonized	ANGEL	DNA/hAT	chr2	56341411	56341479	-	17.6
ID=chr2:-:gene:56338264:56342456;children=UL_297;	UL_297	lincRNA	chr2	56338264	56342456	-	4193	4193	SINGLE	1	chr2	56338264	56342456	4193	70	1.66945	1.66945	29.5731	exonized	ANGEL	DNA/hAT	chr2	56341111	56341180	-	17.6
ID=chr2:-:gene:593221:655596;children=Zv9_00003971,Zv9_00003970;	Zv9_00003970	lincRNA	chr2	593221	655582	-	62362	1367	FIRST	1	chr2	655506	655582	77	77	100	5.63277	29.9195	TSS_SPL	hAT-N67_DR	DNA/hAT?	chr2	654971	655821	-	10.6
ID=chr2:-:gene:593221:655596;children=Zv9_00003971,Zv9_00003970;	Zv9_00003970	lincRNA	chr2	593221	655582	-	62362	1367	LAST	4	chr2	593221	594188	968	126	13.0165	9.21726	29.9195	PolyA	HE1_DR1	SINE/V	chr2	593066	593346	-	13.2
ID=chr2:-:gene:593221:655596;children=Zv9_00003971,Zv9_00003970;	Zv9_00003970	lincRNA	chr2	593221	655582	-	62362	1367	LAST	4	chr2	593221	594188	968	119	12.2934	8.70519	29.9195	exonized	DNA-1-6_DR	DNA	chr2	593652	593770	+	16.8
ID=chr2:-:gene:593221:655596;children=Zv9_00003971,Zv9_00003970;	Zv9_00003970	lincRNA	chr2	593221	655582	-	62362	1367	LAST	4	chr2	593221	594188	968	87	8.9876	6.3643	29.9195	exonized	DIRS-1B-LTR_DR	LTR/Ngaro	chr2	593269	593355	-	15.1
ID=chr2:-:gene:593221:655596;children=Zv9_00003971,Zv9_00003970;	Zv9_00003971	lincRNA	chr2	593802	655596	-	61795	804	FIRST	1	chr2	655502	655596	95	95	100	11.8159	11.8159	TSS_SPL	hAT-N67_DR	DNA/hAT?	chr2	654971	655821	-	10.6
ID=chr2:-:gene:59600966:59601259;children=Zv9_00005187;	Zv9_00005187	lincRNA	chr2	59600966	59601259	-	294	184	LAST	2	chr2	59600966	59601125	160	19	11.875	10.3261	10.3261	SPL	Polinton-1_DR	DNA/Maverick	chr2	59601107	59601151	-	20.5
ID=chr2:-:gene:59926872:59929843;children=Zv9_00005203;	Zv9_00005203	lincRNA	chr2	59926872	59929843	-	2972	2269	FIRST	1	chr2	59928096	59929843	1748	134	7.6659	5.90569	11.1503	exonized	Gypsy-31-LTR_DR	LTR/Gypsy	chr2	59928137	59928270	-	18.3
ID=chr2:-:gene:59926872:59929843;children=Zv9_00005203;	Zv9_00005203	lincRNA	chr2	59926872	59929843	-	2972	2269	FIRST	1	chr2	59928096	59929843	1748	119	6.80778	5.2446	11.1503	SPL	ERV1-N3-I_DR-int	LTR	chr2	59928033	59928214	-	20.3
ID=chr2:-:gene:9535386:9536995;children=Zv9_00004148,Zv9_00004150,Zv9_00004151,Zv9_00004149;	Zv9_00004150	lincRNA	chr2	9535386	9536995	-	1610	536	FIRST	1	chr2	9536899	9536995	97	11	11.3402	2.05224	2.05224	TSS	DIRS-8_DR	LTR/Ngaro	chr2	9536985	9543222	+	15.8
ID=chr2:+:gene:13973774:13975275;children=Zv9_00002888;	Zv9_00002888	lincRNA	chr2	13973774	13975275	+	1502	772	FIRST	1	chr2	13973774	13974429	656	366	55.7927	47.4093	57.9016	exonized	Copia-7-I_DR-int	LTR/Gypsy?	chr2	13974023	13974388	-	21.7
ID=chr2:+:gene:13973774:13975275;children=Zv9_00002888;	Zv9_00002888	lincRNA	chr2	13973774	13975275	+	1502	772	LAST	2	chr2	13975160	13975275	116	81	69.8276	10.4922	57.9016	PolyA	Copia-7-I_DR-int	LTR/Gypsy?	chr2	13975195	13975604	-	21.7
ID=chr2:+:gene:16406132:16416174;children=UL_281;	UL_281	lincRNA	chr2	16406132	16416174	+	10043	2138	LAST	6	chr2	16414998	16416174	1177	305	25.9133	14.2657	14.2657	exonized	ANGEL	DNA/hAT	chr2	16415178	16415482	-	17.6
ID=chr2:+:gene:18474914:18477521;children=Zv9_00002950;	Zv9_00002950	lincRNA	chr2	18474914	18477521	+	2608	225	FIRST	1	chr2	18474914	18475081	168	19	11.3095	8.44444	14.2222	TSS	ERV4_DR-I-int	LTR/ERV1	chr2	18474833	18474932	-	17.8
ID=chr2:+:gene:18474914:18477521;children=Zv9_00002950;	Zv9_00002950	lincRNA	chr2	18474914	18477521	+	2608	225	LAST	2	chr2	18477465	18477521	57	13	22.807	5.77778	14.2222	PolyA	ERV4_DR-I-int	LTR/ERV1	chr2	18477509	18478234	-	17.8
ID=chr2:+:gene:19346942:19351962;children=UL_282;	UL_282	lincRNA	chr2	19346942	19351962	+	5021	5021	SINGLE	1	chr2	19346942	19351962	5021	250	4.97909	4.97909	41.5654	exonized	TDR12	DNA	chr2	19350448	19350697	+	10.6
ID=chr2:+:gene:19346942:19351962;children=UL_282;	UL_282	lincRNA	chr2	19346942	19351962	+	5021	5021	SINGLE	1	chr2	19346942	19351962	5021	68	1.35431	1.35431	41.5654	exonized	Kolobok-N3_DR	DNA/Kolobok?	chr2	19351180	19351247	-	15.6
ID=chr2:+:gene:19346942:19351962;children=UL_282;	UL_282	lincRNA	chr2	19346942	19351962	+	5021	5021	SINGLE	1	chr2	19346942	19351962	5021	50	0.995818	0.995818	41.5654	exonized	Kolobok-N3_DR	DNA/Kolobok?	chr2	19350698	19350747	-	15.6
ID=chr2:+:gene:19346942:19351962;children=UL_282;	UL_282	lincRNA	chr2	19346942	19351962	+	5021	5021	SINGLE	1	chr2	19346942	19351962	5021	83	1.65306	1.65306	41.5654	exonized	Kolobok-N3_DR	DNA/Kolobok?	chr2	19350298	19350380	-	15.6
ID=chr2:+:gene:19346942:19351962;children=UL_282;	UL_282	lincRNA	chr2	19346942	19351962	+	5021	5021	SINGLE	1	chr2	19346942	19351962	5021	156	3.10695	3.10695	41.5654	exonized	HATN10_DR	DNA/hAT	chr2	19350075	19350230	-	12.3
ID=chr2:+:gene:19346942:19351962;children=UL_282;	UL_282	lincRNA	chr2	19346942	19351962	+	5021	5021	SINGLE	1	chr2	19346942	19351962	5021	231	4.60068	4.60068	41.5654	exonized	HATN10_DR	DNA/hAT	chr2	19349206	19349436	-	12.3
ID=chr2:+:gene:19346942:19351962;children=UL_282;	UL_282	lincRNA	chr2	19346942	19351962	+	5021	5021	SINGLE	1	chr2	19346942	19351962	5021	638	12.7066	12.7066	41.5654	exonized	DNAX-1_DR	DNA	chr2	19349437	19350074	+	16.9
ID=chr2:+:gene:19346942:19351962;children=UL_282;	UL_282	lincRNA	chr2	19346942	19351962	+	5021	5021	SINGLE	1	chr2	19346942	19351962	5021	227	4.52101	4.52101	41.5654	exonized	DNA-AT-1_DR	DNA	chr2	19350941	19351167	+	13.4
ID=chr2:+:gene:19346942:19351962;children=UL_282;	UL_282	lincRNA	chr2	19346942	19351962	+	5021	5021	SINGLE	1	chr2	19346942	19351962	5021	384	7.64788	7.64788	41.5654	exonized	DIRS-N3_DR	LTR/Ngaro	chr2	19350741	19351124	+	18.2
ID=chr2:+:gene:22613691:22620838;children=Zv9_00003043;	Zv9_00003043	lincRNA	chr2	22613691	22620838	+	7148	960	FIRST	1	chr2	22613691	22613746	56	56	100	5.83333	20	TSS_SPL	DNA-X-9_DR	DNA	chr2	22613593	22614054	+	19.5
ID=chr2:+:gene:22613691:22620838;children=Zv9_00003043;	Zv9_00003043	lincRNA	chr2	22613691	22620838	+	7148	960	LAST	4	chr2	22620142	22620838	697	136	19.5122	14.1667	20	PolyA	Kolobok-N5_DR	DNA/Kolobok?	chr2	22620703	22620886	+	14.6
ID=chr2:+:gene:24372774:24381550;children=UL_283;	UL_283	lincRNA	chr2	24372774	24381550	+	8777	3745	LAST	4	chr2	24378530	24381550	3021	24	0.794439	0.640854	13.4045	exonized	EnSpm-N1_DR	DNA/En-Spm	chr2	24380610	24380633	+	19.7
ID=chr2:+:gene:24372774:24381550;children=UL_283;	UL_283	lincRNA	chr2	24372774	24381550	+	8777	3745	LAST	4	chr2	24378530	24381550	3021	82	2.71433	2.18959	13.4045	exonized	DNA-2-30_DR	DNA	chr2	24379490	24379571	-	14
ID=chr2:+:gene:24372774:24381550;children=UL_283;	UL_283	lincRNA	chr2	24372774	24381550	+	8777	3745	LAST	4	chr2	24378530	24381550	3021	92	3.04535	2.45661	13.4045	exonized	ANGEL	DNA/hAT	chr2	24380634	24380725	-	17.6
ID=chr2:+:gene:24372774:24381550;children=UL_283;	UL_283	lincRNA	chr2	24372774	24381550	+	8777	3745	LAST	4	chr2	24378530	24381550	3021	304	10.0629	8.11749	13.4045	exonized	ANGEL	DNA/hAT	chr2	24378827	24379130	+	17.6
ID=chr2:+:gene:24900112:24907378;children=Zv9_00003128;	Zv9_00003128	lincRNA	chr2	24900112	24907378	+	7267	1688	LAST	3	chr2	24906600	24907378	779	73	9.37099	4.32464	15.6398	exonized	TDR22	DNA	chr2	24906922	24906994	+	13.7
ID=chr2:+:gene:24900112:24907378;children=Zv9_00003128;	Zv9_00003128	lincRNA	chr2	24900112	24907378	+	7267	1688	LAST	3	chr2	24906600	24907378	779	61	7.83055	3.61374	15.6398	SPL	TDR22	DNA	chr2	24906550	24906660	+	13.7
ID=chr2:+:gene:24900112:24907378;children=Zv9_00003128;	Zv9_00003128	lincRNA	chr2	24900112	24907378	+	7267	1688	LAST	3	chr2	24906600	24907378	779	130	16.6881	7.70142	15.6398	exonized	SINE2-1_DR	SINE/tRNA	chr2	24906667	24906796	+	19.1
ID=chr2:+:gene:28143433:28206504;children=Zv9_00003201;	Zv9_00003201	lincRNA	chr2	28143433	28206504	+	63072	3260	LAST	4	chr2	28203585	28206504	2920	74	2.53425	2.26994	16.0429	PolyA	TC1DR3	DNA/TcMar-Tc1	chr2	28206431	28206643	+	10.4
ID=chr2:+:gene:28143433:28206504;children=Zv9_00003201;	Zv9_00003201	lincRNA	chr2	28143433	28206504	+	63072	3260	LAST	4	chr2	28203585	28206504	2920	205	7.02055	6.28834	16.0429	exonized	HE1_DR1	SINE/V	chr2	28204889	28205093	-	13.2
ID=chr2:+:gene:28143433:28206504;children=Zv9_00003201;	Zv9_00003201	lincRNA	chr2	28143433	28206504	+	63072	3260	LAST	4	chr2	28203585	28206504	2920	62	2.12329	1.90184	16.0429	exonized	DNA-8-9_DR	DNA/hAT-Ac?	chr2	28205855	28205916	+	18.1
ID=chr2:+:gene:28143433:28206504;children=Zv9_00003201;	Zv9_00003201	lincRNA	chr2	28143433	28206504	+	63072	3260	LAST	4	chr2	28203585	28206504	2920	64	2.19178	1.96319	16.0429	exonized	DNA-5-8_DR	DNA	chr2	28206217	28206280	+	17.2
ID=chr2:+:gene:28143433:28206504;children=Zv9_00003201;	Zv9_00003201	lincRNA	chr2	28143433	28206504	+	63072	3260	LAST	4	chr2	28203585	28206504	2920	30	1.0274	0.920245	16.0429	exonized	DNA-5-1_DR	DNA	chr2	28206158	28206187	-	13.7
ID=chr2:+:gene:28143433:28206504;children=Zv9_00003201;	Zv9_00003201	lincRNA	chr2	28143433	28206504	+	63072	3260	LAST	4	chr2	28203585	28206504	2920	88	3.0137	2.69939	16.0429	exonized	DIRS-1B-LTR_DR	LTR/Ngaro	chr2	28205116	28205203	-	15.1
ID=chr2:+:gene:29427411:29442178;children=Zv9_00003210;	Zv9_00003210	lincRNA	chr2	29427411	29442178	+	14768	917	LAST	2	chr2	29441456	29442178	723	82	11.3416	8.9422	8.9422	exonized	ANGEL	DNA/hAT	chr2	29442029	29442110	-	17.6
ID=chr2:+:gene:32105154:32108029;children=UL_285;	UL_285	lincRNA	chr2	32105154	32108029	+	2876	2876	SINGLE	1	chr2	32105154	32108029	2876	154	5.35466	5.35466	19.3672	exonized	SINE2-1_DR	SINE/tRNA	chr2	32106839	32106992	-	19.1
ID=chr2:+:gene:32105154:32108029;children=UL_285;	UL_285	lincRNA	chr2	32105154	32108029	+	2876	2876	SINGLE	1	chr2	32105154	32108029	2876	144	5.00695	5.00695	19.3672	exonized	HATN2_DR	DNA/hAT	chr2	32107311	32107454	-	13.3
ID=chr2:+:gene:32105154:32108029;children=UL_285;	UL_285	lincRNA	chr2	32105154	32108029	+	2876	2876	SINGLE	1	chr2	32105154	32108029	2876	136	4.72879	4.72879	19.3672	exonized	DNA-8-9_DR	DNA/hAT-Ac?	chr2	32107019	32107154	+	18.1
ID=chr2:+:gene:32105154:32108029;children=UL_285;	UL_285	lincRNA	chr2	32105154	32108029	+	2876	2876	SINGLE	1	chr2	32105154	32108029	2876	69	2.39917	2.39917	19.3672	exonized	CR1-2_DR	LINE/L2	chr2	32107751	32107819	+	9.9
ID=chr2:+:gene:32105154:32108029;children=UL_285;	UL_285	lincRNA	chr2	32105154	32108029	+	2876	2876	SINGLE	1	chr2	32105154	32108029	2876	54	1.87761	1.87761	19.3672	exonized	ANGEL	DNA/hAT	chr2	32106267	32106320	-	17.6
ID=chr2:+:gene:32572091:32579874;children=Zv9_00003314;	Zv9_00003314	lincRNA	chr2	32572091	32579874	+	7784	2061	LAST	2	chr2	32578487	32579874	1388	156	11.2392	7.56914	7.56914	PolyA	TC1DR3	DNA/TcMar-Tc1	chr2	32579719	32579998	-	10.4
ID=chr2:+:gene:32740772:32745731;children=Zv9_00003315;	Zv9_00003315	lincRNA	chr2	32740772	32745731	+	4960	3175	LAST	2	chr2	32742751	32745731	2981	240	8.05099	7.55906	18.5512	exonized	Mariner-N7_DR	DNA/TcMar	chr2	32743888	32744127	+	13.8
ID=chr2:+:gene:32740772:32745731;children=Zv9_00003315;	Zv9_00003315	lincRNA	chr2	32740772	32745731	+	4960	3175	LAST	2	chr2	32742751	32745731	2981	185	6.20597	5.82677	18.5512	exonized	DNA-8-34_DR	DNA/hAT-Tip100	chr2	32743656	32743840	-	13.8
ID=chr2:+:gene:32740772:32745731;children=Zv9_00003315;	Zv9_00003315	lincRNA	chr2	32740772	32745731	+	4960	3175	LAST	2	chr2	32742751	32745731	2981	164	5.50151	5.16535	18.5512	exonized	DNA-8-34_DR	DNA/hAT-Tip100	chr2	32743409	32743572	-	13.8
ID=chr2:+:gene:35209248:35223766;children=UL_286;	UL_286	lincRNA	chr2	35209248	35223766	+	14519	6962	LAST	2	chr2	35217051	35223766	6716	187	2.7844	2.68601	41.3387	exonized	hAT-N66B_DR	DNA/hAT-Charlie	chr2	35220928	35221114	+	10.7
ID=chr2:+:gene:35209248:35223766;children=UL_286;	UL_286	lincRNA	chr2	35209248	35223766	+	14519	6962	LAST	2	chr2	35217051	35223766	6716	108	1.6081	1.55128	41.3387	exonized	hAT-N25_DR	DNA/hAT-Ac	chr2	35218426	35218533	-	13.4
ID=chr2:+:gene:35209248:35223766;children=UL_286;	UL_286	lincRNA	chr2	35209248	35223766	+	14519	6962	LAST	2	chr2	35217051	35223766	6716	111	1.65277	1.59437	41.3387	exonized	hAT-N25_DR	DNA/hAT-Ac	chr2	35218195	35218305	-	13.4
ID=chr2:+:gene:35209248:35223766;children=UL_286;	UL_286	lincRNA	chr2	35209248	35223766	+	14519	6962	LAST	2	chr2	35217051	35223766	6716	320	4.76474	4.59638	41.3387	exonized	Tc1N1_DR	DNA/TcMar-Tc1	chr2	35219085	35219404	-	13.9
ID=chr2:+:gene:35209248:35223766;children=UL_286;	UL_286	lincRNA	chr2	35209248	35223766	+	14519	6962	LAST	2	chr2	35217051	35223766	6716	106	1.57832	1.52255	41.3387	exonized	Tc1N1_DR	DNA/TcMar-Tc1	chr2	35218587	35218692	-	13.9
ID=chr2:+:gene:35209248:35223766;children=UL_286;	UL_286	lincRNA	chr2	35209248	35223766	+	14519	6962	LAST	2	chr2	35217051	35223766	6716	214	3.18642	3.07383	41.3387	exonized	TE-X-4_DR	Unknown	chr2	35219214	35219427	-	17.1
ID=chr2:+:gene:35209248:35223766;children=UL_286;	UL_286	lincRNA	chr2	35209248	35223766	+	14519	6962	LAST	2	chr2	35217051	35223766	6716	70	1.04229	1.00546	41.3387	exonized	Harbinger-N9_DR	DNA/Harbinger	chr2	35220724	35220793	-	13.6
ID=chr2:+:gene:35209248:35223766;children=UL_286;	UL_286	lincRNA	chr2	35209248	35223766	+	14519	6962	LAST	2	chr2	35217051	35223766	6716	78	1.16141	1.12037	41.3387	exonized	Harbinger-N9_DR	DNA/Harbinger	chr2	35219406	35219483	-	13.6
ID=chr2:+:gene:35209248:35223766;children=UL_286;	UL_286	lincRNA	chr2	35209248	35223766	+	14519	6962	LAST	2	chr2	35217051	35223766	6716	47	0.699821	0.675093	41.3387	exonized	Harbinger-N9_DR	DNA/Harbinger	chr2	35218103	35218149	-	13.6
ID=chr2:+:gene:35209248:35223766;children=UL_286;	UL_286	lincRNA	chr2	35209248	35223766	+	14519	6962	LAST	2	chr2	35217051	35223766	6716	359	5.34544	5.15656	41.3387	exonized	HE1_DR1	SINE/V	chr2	35221646	35222004	+	13.2
ID=chr2:+:gene:35209248:35223766;children=UL_286;	UL_286	lincRNA	chr2	35209248	35223766	+	14519	6962	LAST	2	chr2	35217051	35223766	6716	190	2.82906	2.7291	41.3387	exonized	EnSpm-N7_DR	DNA/En-Spm	chr2	35222256	35222445	+	13.1
ID=chr2:+:gene:35209248:35223766;children=UL_286;	UL_286	lincRNA	chr2	35209248	35223766	+	14519	6962	LAST	2	chr2	35217051	35223766	6716	52	0.77427	0.746912	41.3387	exonized	EnSpm-N7_DR	DNA/En-Spm	chr2	35221998	35222049	+	13.1
ID=chr2:+:gene:35209248:35223766;children=UL_286;	UL_286	lincRNA	chr2	35209248	35223766	+	14519	6962	LAST	2	chr2	35217051	35223766	6716	378	5.62835	5.42947	41.3387	exonized	EnSpm-N7_DR	DNA/En-Spm	chr2	35218707	35219084	+	13.1
ID=chr2:+:gene:35209248:35223766;children=UL_286;	UL_286	lincRNA	chr2	35209248	35223766	+	14519	6962	LAST	2	chr2	35217051	35223766	6716	168	2.50149	2.4131	41.3387	exonized	EnSpm-N5_DR	DNA/En-Spm	chr2	35222083	35222250	+	15
ID=chr2:+:gene:35209248:35223766;children=UL_286;	UL_286	lincRNA	chr2	35209248	35223766	+	14519	6962	LAST	2	chr2	35217051	35223766	6716	84	1.25074	1.20655	41.3387	exonized	DNA25TWA1_DR	DNA	chr2	35218303	35218386	-	14.4
ID=chr2:+:gene:35209248:35223766;children=UL_286;	UL_286	lincRNA	chr2	35209248	35223766	+	14519	6962	LAST	2	chr2	35217051	35223766	6716	41	0.610482	0.588911	41.3387	exonized	DIRS-8_DR	LTR/Ngaro	chr2	35221605	35221645	+	15.8
ID=chr2:+:gene:35209248:35223766;children=UL_286;	UL_286	lincRNA	chr2	35209248	35223766	+	14519	6962	LAST	2	chr2	35217051	35223766	6716	365	5.43478	5.24275	41.3387	exonized	DIRS-7_DR	LTR/Ngaro	chr2	35219539	35219903	-	14.2
ID=chr2:+:gene:38740378:38750380;children=Zv9_00003483;	Zv9_00003483	lincRNA	chr2	38740378	38750380	+	10003	1646	FIRST	1	chr2	38740378	38740958	581	95	16.3511	5.77157	26.4277	TSS	TDR3	DNA/hAT-Charlie	chr2	38740322	38740472	-	16.3
ID=chr2:+:gene:38740378:38750380;children=Zv9_00003483;	Zv9_00003483	lincRNA	chr2	38740378	38750380	+	10003	1646	LAST	2	chr2	38749316	38750380	1065	31	2.9108	1.88335	26.4277	PolyA	hAT-N45_DR	DNA/hAT?	chr2	38750350	38750425	+	10.3
ID=chr2:+:gene:38740378:38750380;children=Zv9_00003483;	Zv9_00003483	lincRNA	chr2	38740378	38750380	+	10003	1646	LAST	2	chr2	38749316	38750380	1065	309	29.0141	18.7728	26.4277	exonized	HarbingerN4_DR	DNA/Harbinger	chr2	38749979	38750287	-	11
ID=chr2:+:gene:38763831:38774500;children=Zv9_00003484;	Zv9_00003484	lincRNA	chr2	38763831	38774500	+	10670	2090	FIRST	1	chr2	38763831	38764083	253	34	13.4387	1.62679	56.3636	TSS	DNA11TA1_DR	DNA/TcMar-Tc1	chr2	38763686	38763864	+	14.2
ID=chr2:+:gene:38763831:38774500;children=Zv9_00003484;	Zv9_00003484	lincRNA	chr2	38763831	38774500	+	10670	2090	LAST	2	chr2	38772664	38774500	1837	90	4.89929	4.30622	56.3636	exonized	hAT-N64_DR	DNA/hAT?	chr2	38774358	38774447	+	11.7
ID=chr2:+:gene:38763831:38774500;children=Zv9_00003484;	Zv9_00003484	lincRNA	chr2	38763831	38774500	+	10670	2090	LAST	2	chr2	38772664	38774500	1837	94	5.11704	4.49761	56.3636	exonized	hAT-N64_DR	DNA/hAT?	chr2	38774103	38774196	+	11.7
ID=chr2:+:gene:38763831:38774500;children=Zv9_00003484;	Zv9_00003484	lincRNA	chr2	38763831	38774500	+	10670	2090	LAST	2	chr2	38772664	38774500	1837	214	11.6494	10.2392	56.3636	exonized	LOOPERN6_DR	DNA/PiggyBac	chr2	38773811	38774024	-	14.3
ID=chr2:+:gene:38763831:38774500;children=Zv9_00003484;	Zv9_00003484	lincRNA	chr2	38763831	38774500	+	10670	2090	LAST	2	chr2	38772664	38774500	1837	57	3.10289	2.72727	56.3636	exonized	LOOPERN6_DR	DNA/PiggyBac	chr2	38773762	38773818	-	14.3
ID=chr2:+:gene:38763831:38774500;children=Zv9_00003484;	Zv9_00003484	lincRNA	chr2	38763831	38774500	+	10670	2090	LAST	2	chr2	38772664	38774500	1837	104	5.6614	4.97608	56.3636	exonized	LOOPERN6_DR	DNA/PiggyBac	chr2	38773656	38773759	-	14.3
ID=chr2:+:gene:38763831:38774500;children=Zv9_00003484;	Zv9_00003484	lincRNA	chr2	38763831	38774500	+	10670	2090	LAST	2	chr2	38772664	38774500	1837	165	8.98204	7.89474	56.3636	exonized	LOOPERN6_DR	DNA/PiggyBac	chr2	38773492	38773656	+	14.3
ID=chr2:+:gene:38763831:38774500;children=Zv9_00003484;	Zv9_00003484	lincRNA	chr2	38763831	38774500	+	10670	2090	LAST	2	chr2	38772664	38774500	1837	127	6.91345	6.07656	56.3636	exonized	LOOPERN6_DR	DNA/PiggyBac	chr2	38773249	38773375	-	14.3
ID=chr2:+:gene:38763831:38774500;children=Zv9_00003484;	Zv9_00003484	lincRNA	chr2	38763831	38774500	+	10670	2090	LAST	2	chr2	38772664	38774500	1837	151	8.21992	7.22488	56.3636	exonized	LOOPERN6_DR	DNA/PiggyBac	chr2	38773108	38773258	-	14.3
ID=chr2:+:gene:38763831:38774500;children=Zv9_00003484;	Zv9_00003484	lincRNA	chr2	38763831	38774500	+	10670	2090	LAST	2	chr2	38772664	38774500	1837	142	7.72999	6.79426	56.3636	exonized	LOOPERN6_DR	DNA/PiggyBac	chr2	38772969	38773110	+	14.3
ID=chr2:+:gene:42874467:42875634;children=Zv9_00003550;	Zv9_00003550	lincRNA	chr2	42874467	42875634	+	1168	936	LAST	3	chr2	42874809	42875634	826	243	29.4189	25.9615	65.7051	exonized	TDR16	DNA	chr2	42875250	42875492	-	13.9
ID=chr2:+:gene:42874467:42875634;children=Zv9_00003550;	Zv9_00003550	lincRNA	chr2	42874467	42875634	+	1168	936	LAST	3	chr2	42874809	42875634	826	265	32.0823	28.312	65.7051	SPL	HE1_DR1	SINE/V	chr2	42874781	42875073	-	13.2
ID=chr2:+:gene:42874467:42875634;children=Zv9_00003550;	Zv9_00003550	lincRNA	chr2	42874467	42875634	+	1168	936	LAST	3	chr2	42874809	42875634	826	107	12.954	11.4316	65.7051	SPL	DNA-8-14_DR	DNA/hAT-Charlie	chr2	42874758	42874915	+	11.4
ID=chr2:+:gene:43662129:43668394;children=UL_291;	UL_291	lincRNA	chr2	43662129	43668394	+	6266	6266	SINGLE	1	chr2	43662129	43668394	6266	272	4.34089	4.34089	31.7587	exonized	TDR24	DNA	chr2	43662436	43662707	-	15.1
ID=chr2:+:gene:43662129:43668394;children=UL_291;	UL_291	lincRNA	chr2	43662129	43668394	+	6266	6266	SINGLE	1	chr2	43662129	43668394	6266	630	10.0543	10.0543	31.7587	exonized	Kolobok-N1_DR	DNA/Kolobok?	chr2	43666806	43667435	+	15.1
ID=chr2:+:gene:43662129:43668394;children=UL_291;	UL_291	lincRNA	chr2	43662129	43668394	+	6266	6266	SINGLE	1	chr2	43662129	43668394	6266	394	6.2879	6.2879	31.7587	exonized	Kolobok-N1_DR	DNA/Kolobok?	chr2	43666220	43666613	+	15.1
ID=chr2:+:gene:43662129:43668394;children=UL_291;	UL_291	lincRNA	chr2	43662129	43668394	+	6266	6266	SINGLE	1	chr2	43662129	43668394	6266	148	2.36195	2.36195	31.7587	exonized	Kolobok-N1_DR	DNA/Kolobok?	chr2	43665884	43666031	+	15.1
ID=chr2:+:gene:43662129:43668394;children=UL_291;	UL_291	lincRNA	chr2	43662129	43668394	+	6266	6266	SINGLE	1	chr2	43662129	43668394	6266	268	4.27705	4.27705	31.7587	exonized	Kolobok-N1_DR	DNA/Kolobok?	chr2	43665632	43665899	-	15.1
ID=chr2:+:gene:43662129:43668394;children=UL_291;	UL_291	lincRNA	chr2	43662129	43668394	+	6266	6266	SINGLE	1	chr2	43662129	43668394	6266	15	0.239387	0.239387	31.7587	exonized	EnSpm-6N1_DR	DNA/En-Spm	chr2	43662299	43662313	+	16.4
ID=chr2:+:gene:43662129:43668394;children=UL_291;	UL_291	lincRNA	chr2	43662129	43668394	+	6266	6266	SINGLE	1	chr2	43662129	43668394	6266	120	1.9151	1.9151	31.7587	exonized	DNA-8-14_DR	DNA/hAT-Charlie	chr2	43662314	43662433	-	11.4
ID=chr2:+:gene:43662129:43668394;children=UL_291;	UL_291	lincRNA	chr2	43662129	43668394	+	6266	6266	SINGLE	1	chr2	43662129	43668394	6266	143	2.28216	2.28216	31.7587	exonized	ANGEL	DNA/hAT	chr2	43663760	43663902	-	17.6
ID=chr2:+:gene:44434722:44448194;children=Zv9_00003599;	Zv9_00003599	lincRNA	chr2	44434722	44448194	+	13473	486	FIRST	1	chr2	44434722	44434751	30	30	100	6.17284	39.5062	TSS_SPL	TDR13	DNA	chr2	44434184	44434877	-	15.4
ID=chr2:+:gene:44434722:44448194;children=Zv9_00003599;	Zv9_00003599	lincRNA	chr2	44434722	44448194	+	13473	486	LAST	2	chr2	44447739	44448194	456	162	35.5263	33.3333	39.5062	PolyA	Kolobok-N1_DR	DNA/Kolobok?	chr2	44448033	44448276	+	15.1
ID=chr2:+:gene:47086249:47185256;children=Zv9_00003645;	Zv9_00003645	lincRNA	chr2	47086249	47185256	+	99008	1121	MIDDLE	3	chr2	47183619	47183718	100	100	100	8.92061	8.92061	Both_SPL	TDR13	DNA	chr2	47183151	47183873	-	15.4
ID=chr2:+:gene:5368854:5371665;children=Zv9_00002727;	Zv9_00002727	lincRNA	chr2	5368854	5371665	+	2812	872	LAST	2	chr2	5371072	5371665	594	37	6.22896	4.24312	4.24312	PolyA	DNA-TA-2_DR	DNA	chr2	5371629	5371815	-	13.4
ID=chr2:+:gene:54031198:54048313;children=Zv9_00003780;	Zv9_00003780	lincRNA	chr2	54031198	54048313	+	17116	462	LAST	2	chr2	54047919	54048313	395	15	3.79747	3.24675	12.987	SPL	hAT-N21_DR	DNA/hAT-Charlie	chr2	54047873	54047933	+	14.2
ID=chr2:+:gene:54031198:54048313;children=Zv9_00003780;	Zv9_00003780	lincRNA	chr2	54031198	54048313	+	17116	462	LAST	2	chr2	54047919	54048313	395	45	11.3924	9.74026	12.987	PolyA	DNA-2-20_DR	DNA/En-Spm?	chr2	54048269	54048653	-	19.3
ID=chr2:+:gene:55465660:55466883;children=UL_295;	UL_295	lincRNA	chr2	55465660	55466883	+	1224	1224	SINGLE	1	chr2	55465660	55466883	1224	80	6.53595	6.53595	6.53595	exonized	HATN13_DR	DNA/hAT-Ac	chr2	55466049	55466128	+	12.2
ID=chr2:+:gene:5572021:5575741;children=UL_280;	UL_280	lincRNA	chr2	5572021	5575741	+	3721	3721	SINGLE	1	chr2	5572021	5575741	3721	139	3.73555	3.73555	75.0067	exonized	TDR17	DNA	chr2	5575545	5575683	-	8.2
ID=chr2:+:gene:5572021:5575741;children=UL_280;	UL_280	lincRNA	chr2	5572021	5575741	+	3721	3721	SINGLE	1	chr2	5572021	5575741	3721	70	1.88121	1.88121	75.0067	exonized	SINE_DR1	SINE	chr2	5574356	5574425	-	13.1
ID=chr2:+:gene:5572021:5575741;children=UL_280;	UL_280	lincRNA	chr2	5572021	5575741	+	3721	3721	SINGLE	1	chr2	5572021	5575741	3721	438	11.771	11.771	75.0067	exonized	DNA15TA1_DR	DNA/TcMar-Tc1	chr2	5572869	5573306	+	8.5
ID=chr2:+:gene:5572021:5575741;children=UL_280;	UL_280	lincRNA	chr2	5572021	5575741	+	3721	3721	SINGLE	1	chr2	5572021	5575741	3721	438	11.771	11.771	75.0067	exonized	DNA15TA1_DR	DNA/TcMar-Tc1	chr2	5572430	5572867	+	8.5
ID=chr2:+:gene:5572021:5575741;children=UL_280;	UL_280	lincRNA	chr2	5572021	5575741	+	3721	3721	SINGLE	1	chr2	5572021	5575741	3721	749	20.129	20.129	75.0067	exonized	DNA-8-14_DR	DNA/hAT-Charlie	chr2	5573606	5574354	+	11.4
ID=chr2:+:gene:5572021:5575741;children=UL_280;	UL_280	lincRNA	chr2	5572021	5575741	+	3721	3721	SINGLE	1	chr2	5572021	5575741	3721	489	13.1416	13.1416	75.0067	exonized	DNA-2-6_DR	DNA	chr2	5574921	5575409	-	11
ID=chr2:+:gene:5572021:5575741;children=UL_280;	UL_280	lincRNA	chr2	5572021	5575741	+	3721	3721	SINGLE	1	chr2	5572021	5575741	3721	110	2.95619	2.95619	75.0067	exonized	DNA-2-32_DR	DNA	chr2	5574812	5574921	+	19.5
ID=chr2:+:gene:5572021:5575741;children=UL_280;	UL_280	lincRNA	chr2	5572021	5575741	+	3721	3721	SINGLE	1	chr2	5572021	5575741	3721	358	9.62107	9.62107	75.0067	exonized	DNA-2-2_DR	DNA	chr2	5574426	5574783	-	8.4
ID=chr2:+:gene:57409869:57411715;children=Zv9_00003842;	Zv9_00003842	lincRNA	chr2	57409869	57411715	+	1847	1630	FIRST	1	chr2	57409869	57409946	78	51	65.3846	3.12883	74.908	SPL	LOOPERN5_DR	DNA/PiggyBac	chr2	57409896	57409983	-	11.3
ID=chr2:+:gene:57409869:57411715;children=Zv9_00003842;	Zv9_00003842	lincRNA	chr2	57409869	57411715	+	1847	1630	FIRST	1	chr2	57409869	57409946	78	18	23.0769	1.10429	74.908	TSS	LOOPERN5_DR	DNA/PiggyBac	chr2	57409637	57409886	-	11.3
ID=chr2:+:gene:57409869:57411715;children=Zv9_00003842;	Zv9_00003842	lincRNA	chr2	57409869	57411715	+	1847	1630	LAST	2	chr2	57410164	57411715	1552	253	16.3015	15.5215	74.908	exonized	TZF28B	DNA/TcMar-Tc1	chr2	57411115	57411367	-	10.6
ID=chr2:+:gene:57409869:57411715;children=Zv9_00003842;	Zv9_00003842	lincRNA	chr2	57409869	57411715	+	1847	1630	LAST	2	chr2	57410164	57411715	1552	66	4.25258	4.04908	74.908	exonized	Gypsy118-LTR_DR	LTR/Gypsy	chr2	57410474	57410539	-	15.9
ID=chr2:+:gene:57409869:57411715;children=Zv9_00003842;	Zv9_00003842	lincRNA	chr2	57409869	57411715	+	1847	1630	LAST	2	chr2	57410164	57411715	1552	161	10.3737	9.8773	74.908	exonized	Gypsy-31-LTR_DR	LTR/Gypsy	chr2	57410481	57410641	+	18.3
ID=chr2:+:gene:57409869:57411715;children=Zv9_00003842;	Zv9_00003842	lincRNA	chr2	57409869	57411715	+	1847	1630	LAST	2	chr2	57410164	57411715	1552	324	20.8763	19.8773	74.908	exonized	DNAX-1_DR	DNA	chr2	57410780	57411103	-	16.9
ID=chr2:+:gene:57409869:57411715;children=Zv9_00003842;	Zv9_00003842	lincRNA	chr2	57409869	57411715	+	1847	1630	LAST	2	chr2	57410164	57411715	1552	348	22.4227	21.3497	74.908	PolyA	DNA9NNN1_DR	DNA	chr2	57411368	57412570	+	13.9
ID=chr2:+:gene:6854370:6858916;children=Zv9_00002764;	Zv9_00002764	lincRNA	chr2	6854370	6858916	+	4547	4451	FIRST	1	chr2	6854370	6858711	4342	230	5.2971	5.16738	13.6149	SPL	TDR15	DNA	chr2	6858482	6858781	+	17.2
ID=chr2:+:gene:6854370:6858916;children=Zv9_00002764;	Zv9_00002764	lincRNA	chr2	6854370	6858916	+	4547	4451	FIRST	1	chr2	6854370	6858711	4342	267	6.14924	5.99865	13.6149	exonized	ANGEL	DNA/hAT	chr2	6857418	6857684	+	17.6
ID=chr2:+:gene:6854370:6858916;children=Zv9_00002764;	Zv9_00002764	lincRNA	chr2	6854370	6858916	+	4547	4451	LAST	2	chr2	6858808	6858916	109	109	100	2.44889	13.6149	PolyA_SPL	TDR15	DNA	chr2	6858797	6859010	-	17.2
ID=chr20:-:gene:105464:109047;children=UL_298;	UL_298	lincRNA	chr20	105464	109047	-	3584	2001	FIRST	1	chr20	108233	109047	815	153	18.773	7.64618	37.8811	exonized	ANGEL	DNA/hAT	chr20	108599	108751	-	17.6
ID=chr20:-:gene:105464:109047;children=UL_298;	UL_298	lincRNA	chr20	105464	109047	-	3584	2001	LAST	3	chr20	105464	106545	1082	98	9.0573	4.89755	37.8811	exonized	TDR15	DNA	chr20	106036	106133	+	17.2
ID=chr20:-:gene:105464:109047;children=UL_298;	UL_298	lincRNA	chr20	105464	109047	-	3584	2001	LAST	3	chr20	105464	106545	1082	314	29.0203	15.6922	37.8811	exonized	TDR15	DNA	chr20	105659	105972	+	17.2
ID=chr20:-:gene:105464:109047;children=UL_298;	UL_298	lincRNA	chr20	105464	109047	-	3584	2001	LAST	3	chr20	105464	106545	1082	193	17.8373	9.64518	37.8811	exonized	EnSpm-3_DR	DNA/En-Spm	chr20	106244	106436	-	18.7
ID=chr20:-:gene:1433952:1435671;children=UL_299;	UL_299	lincRNA	chr20	1433952	1435671	-	1720	1720	SINGLE	1	chr20	1433952	1435671	1720	66	3.83721	3.83721	51.0465	exonized	hAT-N22_DR	DNA/hAT	chr20	1434480	1434545	+	14.3
ID=chr20:-:gene:1433952:1435671;children=UL_299;	UL_299	lincRNA	chr20	1433952	1435671	-	1720	1720	SINGLE	1	chr20	1433952	1435671	1720	32	1.86047	1.86047	51.0465	exonized	hAT-5_DR	DNA/hAT-Charlie	chr20	1434263	1434294	-	13.6
ID=chr20:-:gene:1433952:1435671;children=UL_299;	UL_299	lincRNA	chr20	1433952	1435671	-	1720	1720	SINGLE	1	chr20	1433952	1435671	1720	134	7.7907	7.7907	51.0465	exonized	Harbinger-N13_DR	DNA/Harbinger	chr20	1434155	1434288	+	12.2
ID=chr20:-:gene:1433952:1435671;children=UL_299;	UL_299	lincRNA	chr20	1433952	1435671	-	1720	1720	SINGLE	1	chr20	1433952	1435671	1720	433	25.1744	25.1744	51.0465	exonized	DNA-2-16_DR	DNA	chr20	1434973	1435405	-	10.7
ID=chr20:-:gene:1433952:1435671;children=UL_299;	UL_299	lincRNA	chr20	1433952	1435671	-	1720	1720	SINGLE	1	chr20	1433952	1435671	1720	213	12.3837	12.3837	51.0465	exonized	DNA-2-16_DR	DNA	chr20	1434732	1434944	+	10.7
ID=chr20:-:gene:2154904:2159255;children=UL_300;	UL_300	lincRNA	chr20	2154904	2159255	-	4352	4352	SINGLE	1	chr20	2154904	2159255	4352	191	4.38879	4.38879	23.8281	exonized	TC1DR3	DNA/TcMar-Tc1	chr20	2155662	2155852	+	10.4
ID=chr20:-:gene:2154904:2159255;children=UL_300;	UL_300	lincRNA	chr20	2154904	2159255	-	4352	4352	SINGLE	1	chr20	2154904	2159255	4352	135	3.10202	3.10202	23.8281	exonized	HATN12_DR	DNA/hAT-Ac	chr20	2155292	2155426	+	16.5
ID=chr20:-:gene:2154904:2159255;children=UL_300;	UL_300	lincRNA	chr20	2154904	2159255	-	4352	4352	SINGLE	1	chr20	2154904	2159255	4352	238	5.46875	5.46875	23.8281	exonized	DNA-3-4_DR	DNA/Harbinger	chr20	2157185	2157422	+	12.9
ID=chr20:-:gene:2154904:2159255;children=UL_300;	UL_300	lincRNA	chr20	2154904	2159255	-	4352	4352	SINGLE	1	chr20	2154904	2159255	4352	118	2.7114	2.7114	23.8281	exonized	DNA-2-30_DR	DNA	chr20	2155544	2155661	+	14
ID=chr20:-:gene:2154904:2159255;children=UL_300;	UL_300	lincRNA	chr20	2154904	2159255	-	4352	4352	SINGLE	1	chr20	2154904	2159255	4352	179	4.11305	4.11305	23.8281	exonized	DNA-2-30_DR	DNA	chr20	2155234	2155412	+	14
ID=chr20:-:gene:2154904:2159255;children=UL_300;	UL_300	lincRNA	chr20	2154904	2159255	-	4352	4352	SINGLE	1	chr20	2154904	2159255	4352	176	4.04412	4.04412	23.8281	exonized	DNA-2-30_DR	DNA	chr20	2154970	2155145	-	14
ID=chr20:-:gene:2526174:2527594;children=Zv9_00046349;	Zv9_00046349	lincRNA	chr20	2526174	2527594	-	1421	628	FIRST	1	chr20	2526985	2527594	610	65	10.6557	10.3503	22.7707	exonized	DNA-2-20_DR	DNA/En-Spm?	chr20	2527424	2527488	+	19.3
ID=chr20:-:gene:2526174:2527594;children=Zv9_00046349;	Zv9_00046349	lincRNA	chr20	2526174	2527594	-	1421	628	FIRST	1	chr20	2526985	2527594	610	78	12.7869	12.4204	22.7707	exonized	CR1-1_DR	LINE/L2	chr20	2527014	2527091	+	9.8
ID=chr20:-:gene:25740398:25742022;children=Zv9_00046723;	Zv9_00046723	lincRNA	chr20	25740398	25742022	-	1625	1280	LAST	2	chr20	25740398	25741391	994	238	23.9437	18.5938	37.8125	exonized	TDR12	DNA	chr20	25740453	25740690	-	10.6
ID=chr20:-:gene:25740398:25742022;children=Zv9_00046723;	Zv9_00046723	lincRNA	chr20	25740398	25742022	-	1625	1280	LAST	2	chr20	25740398	25741391	994	161	16.1972	12.5781	37.8125	exonized	HE1_DR1	SINE/V	chr20	25740691	25740851	-	13.2
ID=chr20:-:gene:25740398:25742022;children=Zv9_00046723;	Zv9_00046723	lincRNA	chr20	25740398	25742022	-	1625	1280	LAST	2	chr20	25740398	25741391	994	55	5.5332	4.29688	37.8125	PolyA	HE1_DR1	SINE/V	chr20	25740328	25740452	-	13.2
ID=chr20:-:gene:25740398:25742022;children=Zv9_00046723;	Zv9_00046723	lincRNA	chr20	25740398	25742022	-	1625	1280	LAST	2	chr20	25740398	25741391	994	30	3.01811	2.34375	37.8125	exonized	EnSpm-6N1_DR	DNA/En-Spm	chr20	25740852	25740881	-	16.4
ID=chr20:-:gene:3009003:3012382;children=Zv9_00046367;	Zv9_00046367	lincRNA	chr20	3009003	3012382	-	3380	2421	FIRST	1	chr20	3010684	3012382	1699	272	16.0094	11.235	25.7745	exonized	ANGEL	DNA/hAT	chr20	3010761	3011032	+	17.6
ID=chr20:-:gene:3009003:3012382;children=Zv9_00046367;	Zv9_00046367	lincRNA	chr20	3009003	3012382	-	3380	2421	LAST	2	chr20	3009003	3009724	722	95	13.1579	3.924	25.7745	exonized	IS4EU-1_DR	DNA/Kolobok-IS4EU	chr20	3009466	3009560	+	21.4
ID=chr20:-:gene:3009003:3012382;children=Zv9_00046367;	Zv9_00046367	lincRNA	chr20	3009003	3012382	-	3380	2421	LAST	2	chr20	3009003	3009724	722	171	23.6842	7.0632	25.7745	exonized	ANGEL	DNA/hAT	chr20	3009369	3009539	-	17.6
ID=chr20:-:gene:3009003:3012382;children=Zv9_00046367;	Zv9_00046367	lincRNA	chr20	3009003	3012382	-	3380	2421	LAST	2	chr20	3009003	3009724	722	86	11.9114	3.55225	25.7745	PolyA	ANGEL	DNA/hAT	chr20	3008819	3009088	-	17.6
ID=chr20:-:gene:34670555:34674975;children=Zv9_00046936;	Zv9_00046936	lincRNA	chr20	34670555	34674975	-	4421	2250	LAST	4	chr20	34670555	34672548	1994	94	4.71414	4.17778	60.8	exonized	hAT-N64_DR	DNA/hAT?	chr20	34670930	34671023	+	11.7
ID=chr20:-:gene:34670555:34674975;children=Zv9_00046936;	Zv9_00046936	lincRNA	chr20	34670555	34674975	-	4421	2250	LAST	4	chr20	34670555	34672548	1994	63	3.15948	2.8	60.8	exonized	hAT-N49_DR	DNA/hAT-Ac?	chr20	34670961	34671023	+	14.7
ID=chr20:-:gene:34670555:34674975;children=Zv9_00046936;	Zv9_00046936	lincRNA	chr20	34670555	34674975	-	4421	2250	LAST	4	chr20	34670555	34672548	1994	840	42.1264	37.3333	60.8	exonized	DNA2-3_DR	DNA/hAT?	chr20	34671322	34672161	+	12
ID=chr20:-:gene:34670555:34674975;children=Zv9_00046936;	Zv9_00046936	lincRNA	chr20	34670555	34674975	-	4421	2250	LAST	4	chr20	34670555	34672548	1994	154	7.72317	6.84444	60.8	exonized	DNA-6-N4_DR	DNA	chr20	34671043	34671196	+	10.8
ID=chr20:-:gene:34670555:34674975;children=Zv9_00046936;	Zv9_00046936	lincRNA	chr20	34670555	34674975	-	4421	2250	LAST	4	chr20	34670555	34672548	1994	217	10.8826	9.64444	60.8	exonized	Copia-7-I_DR-int	LTR/Gypsy?	chr20	34672203	34672419	-	21.7
ID=chr20:-:gene:38529519:38533225;children=Zv9_00047019;	Zv9_00047019	lincRNA	chr20	38529519	38533225	-	3707	1209	LAST	2	chr20	38529519	38530412	894	170	19.0157	14.0612	14.0612	exonized	Kolobok-N5_DR	DNA/Kolobok?	chr20	38529549	38529718	-	14.6
ID=chr20:-:gene:39402410:39486066;children=Zv9_00047043;	Zv9_00047043	lincRNA	chr20	39402410	39486066	-	83657	283	FIRST	1	chr20	39486039	39486066	28	28	100	9.89399	34.629	TSS_SPL	TDR3	DNA/hAT-Charlie	chr20	39485982	39486175	-	16.3
ID=chr20:-:gene:39402410:39486066;children=Zv9_00047043;	Zv9_00047043	lincRNA	chr20	39402410	39486066	-	83657	283	MIDDLE	2	chr20	39445650	39445669	20	20	100	7.06714	34.629	Both_SPL	TDR3	DNA/hAT-Charlie	chr20	39445613	39445806	-	16.3
ID=chr20:-:gene:39402410:39486066;children=Zv9_00047043;	Zv9_00047043	lincRNA	chr20	39402410	39486066	-	83657	283	LAST	3	chr20	39402410	39402644	235	37	15.7447	13.0742	34.629	SPL	TDR3	DNA/hAT-Charlie	chr20	39402608	39402801	-	16.3
ID=chr20:-:gene:39402410:39486066;children=Zv9_00047043;	Zv9_00047043	lincRNA	chr20	39402410	39486066	-	83657	283	LAST	3	chr20	39402410	39402644	235	13	5.53191	4.59364	34.629	exonized	ENSPM-6_DR	DNA/En-Spm	chr20	39402595	39402607	-	17.5
ID=chr20:-:gene:45681857:45683285;children=UL_315;	UL_315	lincRNA	chr20	45681857	45683285	-	1429	1429	SINGLE	1	chr20	45681857	45683285	1429	324	22.6732	22.6732	22.6732	exonized	Harbinger-N13_DR	DNA/Harbinger	chr20	45682205	45682528	+	12.2
ID=chr20:-:gene:48946084:48965992;children=Zv9_00047229;	Zv9_00047229	lincRNA	chr20	48946084	48965992	-	19909	290	LAST	2	chr20	48946084	48946127	44	44	100	15.1724	15.1724	PolyA_SPL	HATN13_DR	DNA/hAT-Ac	chr20	48945513	48946377	-	12.2
ID=chr20:+:gene:20574538:20578079;children=UL_303,UL_304;	UL_303	lincRNA	chr20	20574538	20578079	+	3542	3542	SINGLE	1	chr20	20574538	20578079	3542	447	12.62	12.62	14.4269	exonized	TDR7	DNA	chr20	20575708	20576154	+	12.5
ID=chr20:+:gene:20574538:20578079;children=UL_303,UL_304;	UL_303	lincRNA	chr20	20574538	20578079	+	3542	3542	SINGLE	1	chr20	20574538	20578079	3542	64	1.80689	1.80689	14.4269	exonized	ANGEL	DNA/hAT	chr20	20577981	20578044	-	17.6
ID=chr20:+:gene:23232053:23233219;children=UL_310;	UL_310	lincRNA	chr20	23232053	23233219	+	1167	1167	SINGLE	1	chr20	23232053	23233219	1167	534	45.7584	45.7584	89.8029	TSS	hAT-N67_DR	DNA/hAT?	chr20	23231220	23232586	-	10.6
ID=chr20:+:gene:23232053:23233219;children=UL_310;	UL_310	lincRNA	chr20	23232053	23233219	+	1167	1167	SINGLE	1	chr20	23232053	23233219	1167	514	44.0446	44.0446	89.8029	exonized	TDR18	DNA/hAT-Charlie	chr20	23232588	23233101	+	10.6
ID=chr20:+:gene:24448012:24551014;children=Zv9_00045542;	Zv9_00045542	lincRNA	chr20	24448012	24551014	+	103003	1148	FIRST	1	chr20	24448012	24448363	352	352	100	30.662	45.0348	TSS_SPL	Gypsy63-LTR_DR	LTR/Gypsy	chr20	24447840	24448491	+	12.9
ID=chr20:+:gene:24448012:24551014;children=Zv9_00045542;	Zv9_00045542	lincRNA	chr20	24448012	24551014	+	103003	1148	LAST	2	chr20	24550219	24551014	796	165	20.7286	14.3728	45.0348	PolyA	DNA-8-3_DR	DNA	chr20	24550850	24551699	-	12.1
ID=chr20:+:gene:30928446:30932624;children=Zv9_00045734;	Zv9_00045734	lincRNA	chr20	30928446	30932624	+	4179	816	LAST	2	chr20	30932016	30932624	609	34	5.58292	4.16667	4.16667	SPL	ANGEL	DNA/hAT	chr20	30931860	30932049	-	17.6
ID=chr20:+:gene:34687930:34689370;children=Zv9_00045828;	Zv9_00045828	lincRNA	chr20	34687930	34689370	+	1441	608	LAST	2	chr20	34688790	34689370	581	317	54.5611	52.1382	52.1382	PolyA	Kolobok-N3_DR	DNA/Kolobok?	chr20	34689054	34689380	-	15.6
ID=chr20:+:gene:34986762:34990601;children=UL_313;	UL_313	lincRNA	chr20	34986762	34990601	+	3840	3840	SINGLE	1	chr20	34986762	34990601	3840	285	7.42188	7.42188	41.4062	exonized	DNA2-1_DR	DNA/TcMar?	chr20	34989985	34990269	C	15.7
ID=chr20:+:gene:34986762:34990601;children=UL_313;	UL_313	lincRNA	chr20	34986762	34990601	+	3840	3840	SINGLE	1	chr20	34986762	34990601	3840	94	2.44792	2.44792	41.4062	exonized	DNA2-1_DR	DNA/TcMar?	chr20	34989877	34989970	-	15.7
ID=chr20:+:gene:34986762:34990601;children=UL_313;	UL_313	lincRNA	chr20	34986762	34990601	+	3840	3840	SINGLE	1	chr20	34986762	34990601	3840	116	3.02083	3.02083	41.4062	exonized	DNA2-1_DR	DNA/TcMar?	chr20	34989666	34989781	-	15.7
ID=chr20:+:gene:34986762:34990601;children=UL_313;	UL_313	lincRNA	chr20	34986762	34990601	+	3840	3840	SINGLE	1	chr20	34986762	34990601	3840	228	5.9375	5.9375	41.4062	exonized	DNA-2-7_DR	DNA/En-Spm?	chr20	34989435	34989662	-	20.3
ID=chr20:+:gene:34986762:34990601;children=UL_313;	UL_313	lincRNA	chr20	34986762	34990601	+	3840	3840	SINGLE	1	chr20	34986762	34990601	3840	371	9.66146	9.66146	41.4062	exonized	DIRS-N3_DR	LTR/Ngaro	chr20	34989020	34989390	+	18.2
ID=chr20:+:gene:34986762:34990601;children=UL_313;	UL_313	lincRNA	chr20	34986762	34990601	+	3840	3840	SINGLE	1	chr20	34986762	34990601	3840	150	3.90625	3.90625	41.4062	exonized	Copia-8-LTR_DR	LTR/Gypsy?	chr20	34990263	34990412	+	20.5
ID=chr20:+:gene:34986762:34990601;children=UL_313;	UL_313	lincRNA	chr20	34986762	34990601	+	3840	3840	SINGLE	1	chr20	34986762	34990601	3840	275	7.16146	7.16146	41.4062	exonized	CR1-6_DR	LINE/L2	chr20	34987958	34988232	-	15.9
ID=chr20:+:gene:34986762:34990601;children=UL_313;	UL_313	lincRNA	chr20	34986762	34990601	+	3840	3840	SINGLE	1	chr20	34986762	34990601	3840	71	1.84896	1.84896	41.4062	exonized	ANGEL	DNA/hAT	chr20	34988900	34988970	+	17.6
ID=chr20:+:gene:35737466:35851813;children=Zv9_00045867;	Zv9_00045867	lincRNA	chr20	35737466	35851813	+	114348	232	LAST	3	chr20	35851715	35851813	99	52	52.5253	22.4138	22.4138	SPL	DNA9NNN1_DR	DNA	chr20	35851523	35851766	+	13.9
ID=chr20:+:gene:36885345:36935244;children=Zv9_00045890,Zv9_00045892,Zv9_00045891,Zv9_00045889;	Zv9_00045889	lincRNA	chr20	36885345	36897342	+	11998	1234	LAST	3	chr20	36896510	36897342	833	74	8.88355	5.99676	5.99676	exonized	Tc1N1_DR	DNA/En-Spm?	chr20	36896829	36896902	+	13.9
ID=chr20:+:gene:36885345:36935244;children=Zv9_00045890,Zv9_00045892,Zv9_00045891,Zv9_00045889;	Zv9_00045890	lincRNA	chr20	36885345	36897342	+	11998	1424	LAST	4	chr20	36896447	36897342	896	74	8.25893	5.19663	5.19663	exonized	Tc1N1_DR	DNA/En-Spm?	chr20	36896829	36896902	+	13.9
ID=chr20:+:gene:36885345:36935244;children=Zv9_00045890,Zv9_00045892,Zv9_00045891,Zv9_00045889;	Zv9_00045891	lincRNA	chr20	36885395	36897333	+	11939	1302	LAST	4	chr20	36896510	36897333	824	74	8.98058	5.68356	5.68356	exonized	Tc1N1_DR	DNA/En-Spm?	chr20	36896829	36896902	+	13.9
ID=chr20:+:gene:36885345:36935244;children=Zv9_00045890,Zv9_00045892,Zv9_00045891,Zv9_00045889;	Zv9_00045892	lincRNA	chr20	36894501	36935244	+	40744	1295	FIRST	1	chr20	36894501	36894610	110	110	100	8.49421	26.6409	TSS_SPL	SINE3-1a	SINE/5S	chr20	36894499	36894698	+	9.92
ID=chr20:+:gene:36885345:36935244;children=Zv9_00045890,Zv9_00045892,Zv9_00045891,Zv9_00045889;	Zv9_00045892	lincRNA	chr20	36894501	36935244	+	40744	1295	LAST	4	chr20	36934416	36935244	829	89	10.7358	6.87259	26.6409	PolyA	TC1DR3	DNA/TcMar-Tc1	chr20	36935156	36935604	+	10.4
ID=chr20:+:gene:36885345:36935244;children=Zv9_00045890,Zv9_00045892,Zv9_00045891,Zv9_00045889;	Zv9_00045892	lincRNA	chr20	36894501	36935244	+	40744	1295	LAST	4	chr20	36934416	36935244	829	146	17.6116	11.2741	26.6409	exonized	ANGEL	DNA/hAT	chr20	36934996	36935141	-	17.6
ID=chr20:+:gene:46342258:46418546;children=Zv9_00046051,Zv9_00046048,Zv9_00046047,Zv9_00046050,Zv9_00046049,Zv9_00046046;	Zv9_00046050	lincRNA	chr20	46342258	46418546	+	76289	2224	LAST	7	chr20	46417180	46418546	1367	81	5.92538	3.64209	28.1475	exonized	TE-X-1_DR	DNA	chr20	46417921	46418001	-	11
ID=chr20:+:gene:46342258:46418546;children=Zv9_00046051,Zv9_00046048,Zv9_00046047,Zv9_00046050,Zv9_00046049,Zv9_00046046;	Zv9_00046050	lincRNA	chr20	46342258	46418546	+	76289	2224	LAST	7	chr20	46417180	46418546	1367	545	39.8683	24.5054	28.1475	PolyA	Harbinger-N11_DR	DNA/Harbinger	chr20	46418002	46419212	-	11.4
ID=chr20:+:gene:46342258:46418546;children=Zv9_00046051,Zv9_00046048,Zv9_00046047,Zv9_00046050,Zv9_00046049,Zv9_00046046;	Zv9_00046051	lincRNA	chr20	46342273	46364344	+	22072	1358	LAST	3	chr20	46363258	46364344	1087	178	16.3753	13.1075	13.1075	PolyA	CR1-14_DR	LINE/L2	chr20	46364167	46364708	+	18.4
ID=chr20:+:gene:46342258:46418546;children=Zv9_00046051,Zv9_00046048,Zv9_00046050,Zv9_00046047,Zv9_00046049,Zv9_00046046;	Zv9_00046047	lincRNA	chr20	46342258	46418363	+	76106	1860	LAST	5	chr20	46417180	46418363	1184	81	6.84122	4.35484	23.8172	exonized	TE-X-1_DR	DNA	chr20	46417921	46418001	-	11
ID=chr20:+:gene:46342258:46418546;children=Zv9_00046051,Zv9_00046048,Zv9_00046050,Zv9_00046047,Zv9_00046049,Zv9_00046046;	Zv9_00046047	lincRNA	chr20	46342258	46418363	+	76106	1860	LAST	5	chr20	46417180	46418363	1184	362	30.5743	19.4624	23.8172	PolyA	Harbinger-N11_DR	DNA/Harbinger	chr20	46418002	46419212	-	11.4
ID=chr20:+:gene:46342258:46418546;children=Zv9_00046051,Zv9_00046048,Zv9_00046050,Zv9_00046047,Zv9_00046049,Zv9_00046046;	Zv9_00046048	lincRNA	chr20	46342258	46418363	+	76106	1867	LAST	5	chr20	46417180	46418363	1184	81	6.84122	4.33851	23.7279	exonized	TE-X-1_DR	DNA	chr20	46417921	46418001	-	11
ID=chr20:+:gene:46342258:46418546;children=Zv9_00046051,Zv9_00046048,Zv9_00046050,Zv9_00046047,Zv9_00046049,Zv9_00046046;	Zv9_00046048	lincRNA	chr20	46342258	46418363	+	76106	1867	LAST	5	chr20	46417180	46418363	1184	362	30.5743	19.3894	23.7279	PolyA	Harbinger-N11_DR	DNA/Harbinger	chr20	46418002	46419212	-	11.4
ID=chr20:+:gene:46342258:46418546;children=Zv9_00046051,Zv9_00046048,Zv9_00046050,Zv9_00046047,Zv9_00046049,Zv9_00046046;	Zv9_00046049	lincRNA	chr20	46342258	46418546	+	76289	2117	LAST	6	chr20	46417180	46418546	1367	81	5.92538	3.82617	29.5701	exonized	TE-X-1_DR	DNA	chr20	46417921	46418001	-	11
ID=chr20:+:gene:46342258:46418546;children=Zv9_00046051,Zv9_00046048,Zv9_00046050,Zv9_00046047,Zv9_00046049,Zv9_00046046;	Zv9_00046049	lincRNA	chr20	46342258	46418546	+	76289	2117	LAST	6	chr20	46417180	46418546	1367	545	39.8683	25.744	29.5701	PolyA	Harbinger-N11_DR	DNA/Harbinger	chr20	46418002	46419212	-	11.4
ID=chr20:+:gene:48139401:48177148;children=UL_316;	UL_316	lincRNA	chr20	48139401	48177148	+	37748	4876	LAST	5	chr20	48173277	48177148	3872	76	1.96281	1.55865	53.1583	exonized	DNA25TWA2_DR	DNA	chr20	48176382	48176457	+	12.1
ID=chr20:+:gene:48139401:48177148;children=UL_316;	UL_316	lincRNA	chr20	48139401	48177148	+	37748	4876	LAST	5	chr20	48173277	48177148	3872	102	2.6343	2.09188	53.1583	exonized	DNA25TWA2_DR	DNA	chr20	48175856	48175957	+	12.1
ID=chr20:+:gene:48139401:48177148;children=UL_316;	UL_316	lincRNA	chr20	48139401	48177148	+	37748	4876	LAST	5	chr20	48173277	48177148	3872	486	12.5517	9.96719	53.1583	exonized	DNA25TWA2_DR	DNA	chr20	48173692	48174177	+	12.1
ID=chr20:+:gene:48139401:48177148;children=UL_316;	UL_316	lincRNA	chr20	48139401	48177148	+	37748	4876	LAST	5	chr20	48173277	48177148	3872	134	3.46074	2.74815	53.1583	exonized	DNA-AT-1_DR	DNA	chr20	48174326	48174459	+	13.4
ID=chr20:+:gene:48139401:48177148;children=UL_316;	UL_316	lincRNA	chr20	48139401	48177148	+	37748	4876	LAST	5	chr20	48173277	48177148	3872	425	10.9762	8.71616	53.1583	exonized	DNA-8-13_DR	DNA/hAT?	chr20	48175959	48176383	-	12.7
ID=chr20:+:gene:48139401:48177148;children=UL_316;	UL_316	lincRNA	chr20	48139401	48177148	+	37748	4876	LAST	5	chr20	48173277	48177148	3872	150	3.87397	3.07629	53.1583	exonized	DNA-5-8_DR	DNA	chr20	48175705	48175854	-	17.2
ID=chr20:+:gene:48139401:48177148;children=UL_316;	UL_316	lincRNA	chr20	48139401	48177148	+	37748	4876	LAST	5	chr20	48173277	48177148	3872	1219	31.4824	25	53.1583	exonized	DNA-5-6_DR	DNA/hAT	chr20	48174460	48175678	+	11
ID=chr20:+:gene:52274653:52355796;children=Zv9_00046174;	Zv9_00046174	lincRNA	chr20	52274653	52355796	+	81144	1586	LAST	5	chr20	52355245	52355796	552	42	7.6087	2.64817	2.64817	PolyA	TDR2	DNA/TcMar-Tc1	chr20	52355755	52356324	-	8.1
ID=chr20:+:gene:52432112:52575078;children=Zv9_00046175;	Zv9_00046175	lincRNA	chr20	52432112	52575078	+	142967	1823	LAST	3	chr20	52573635	52575078	1444	103	7.13296	5.65003	52.9896	PolyA	TZF28	DNA/TcMar-Tc1	chr20	52574976	52576589	+	13.1
ID=chr20:+:gene:52432112:52575078;children=Zv9_00046175;	Zv9_00046175	lincRNA	chr20	52432112	52575078	+	142967	1823	LAST	3	chr20	52573635	52575078	1444	283	19.5983	15.5239	52.9896	exonized	TDR15	DNA	chr20	52573880	52574162	+	17.2
ID=chr20:+:gene:52432112:52575078;children=Zv9_00046175;	Zv9_00046175	lincRNA	chr20	52432112	52575078	+	142967	1823	LAST	3	chr20	52573635	52575078	1444	580	40.1662	31.8157	52.9896	exonized	HATN6_DR	DNA/hAT-Ac	chr20	52574396	52574975	+	13.7
ID=chr20:+:gene:54774163:54778816;children=Zv9_00046271;	Zv9_00046271	lincRNA	chr20	54774163	54778816	+	4654	2020	FIRST	1	chr20	54774163	54775354	1192	69	5.78859	3.41584	9.25743	exonized	TE-X-4_DR	Unknown	chr20	54775179	54775247	+	17.1
ID=chr20:+:gene:54774163:54778816;children=Zv9_00046271;	Zv9_00046271	lincRNA	chr20	54774163	54778816	+	4654	2020	LAST	2	chr20	54777989	54778816	828	118	14.2512	5.84158	9.25743	exonized	hAT-N38_DR	DNA/hAT-Blackjack	chr20	54778593	54778710	-	12.5
ID=chr21:-:gene:11007069:11174658;children=Zv9_00048716,Zv9_00048717;	Zv9_00048716	lincRNA	chr21	11007069	11173467	-	166399	1441	LAST	4	chr21	11007069	11008013	945	21	2.22222	1.45732	4.99653	PolyA	TDR22	DNA	chr21	11006702	11007089	+	13.7
ID=chr21:-:gene:11007069:11174658;children=Zv9_00048716,Zv9_00048717;	Zv9_00048716	lincRNA	chr21	11007069	11173467	-	166399	1441	LAST	4	chr21	11007069	11008013	945	51	5.39683	3.53921	4.99653	exonized	DNA-8-28_DR	DNA/P?	chr21	11007093	11007143	+	16.2
ID=chr21:-:gene:11007069:11174658;children=Zv9_00048716,Zv9_00048717;	Zv9_00048717	lincRNA	chr21	11007069	11174658	-	167590	1467	LAST	4	chr21	11007069	11008013	945	21	2.22222	1.43149	4.90798	PolyA	TDR22	DNA	chr21	11006702	11007089	+	13.7
ID=chr21:-:gene:11007069:11174658;children=Zv9_00048716,Zv9_00048717;	Zv9_00048717	lincRNA	chr21	11007069	11174658	-	167590	1467	LAST	4	chr21	11007069	11008013	945	51	5.39683	3.47648	4.90798	exonized	DNA-8-28_DR	DNA/P?	chr21	11007093	11007143	+	16.2
ID=chr21:-:gene:18460131:18513711;children=Zv9_00048852,Zv9_00048851;	Zv9_00048851	lincRNA	chr21	18460131	18513711	-	53581	1170	FIRST	1	chr21	18513386	18513711	326	43	13.1902	3.67521	18.7179	exonized	hAT-N35_DR	DNA/hAT?	chr21	18513645	18513687	-	10.3
ID=chr21:-:gene:18460131:18513711;children=Zv9_00048852,Zv9_00048851;	Zv9_00048851	lincRNA	chr21	18460131	18513711	-	53581	1170	MIDDLE	5	chr21	18466164	18466266	103	103	100	8.80342	18.7179	Both_SPL	TDR13B	DNA	chr21	18466055	18466724	+	15.3
ID=chr21:-:gene:18460131:18513711;children=Zv9_00048852,Zv9_00048851;	Zv9_00048851	lincRNA	chr21	18460131	18513711	-	53581	1170	LAST	6	chr21	18460131	18460526	396	73	18.4343	6.23932	18.7179	PolyA	TDR16	DNA	chr21	18460108	18460203	-	13.9
ID=chr21:-:gene:18460131:18513711;children=Zv9_00048852,Zv9_00048851;	Zv9_00048852	lincRNA	chr21	18460131	18513711	-	53581	1067	FIRST	1	chr21	18513386	18513711	326	43	13.1902	4.02999	10.8716	exonized	hAT-N35_DR	DNA/hAT?	chr21	18513645	18513687	-	10.3
ID=chr21:-:gene:18460131:18513711;children=Zv9_00048852,Zv9_00048851;	Zv9_00048852	lincRNA	chr21	18460131	18513711	-	53581	1067	LAST	5	chr21	18460131	18460526	396	73	18.4343	6.84161	10.8716	PolyA	TDR16	DNA	chr21	18460108	18460203	-	13.9
ID=chr21:-:gene:21336998:21350884;children=UL_331;	UL_331	lincRNA	chr21	21336998	21350884	-	13887	5524	LAST	10	chr21	21336998	21339716	2719	409	15.0423	7.40406	14.5004	exonized	TDR24	DNA	chr21	21338063	21338471	+	15.1
ID=chr21:-:gene:21336998:21350884;children=UL_331;	UL_331	lincRNA	chr21	21336998	21350884	-	13887	5524	LAST	10	chr21	21336998	21339716	2719	392	14.4171	7.09631	14.5004	exonized	LTR-11_DR	LTR	chr21	21338722	21339113	+	15.2
ID=chr21:-:gene:25645982:25788789;children=Zv9_00049020;	Zv9_00049020	lincRNA	chr21	25645982	25788789	-	142808	1610	LAST	4	chr21	25645982	25647031	1050	42	4	2.6087	10.6211	exonized	DNA8-4A_DR	DNA/hAT-Charlie	chr21	25646580	25646621	-	11.6
ID=chr21:-:gene:25645982:25788789;children=Zv9_00049020;	Zv9_00049020	lincRNA	chr21	25645982	25788789	-	142808	1610	LAST	4	chr21	25645982	25647031	1050	129	12.2857	8.01242	10.6211	exonized	DNA-8-27_DR	DNA/hAT-Ac?	chr21	25646131	25646259	+	14.5
ID=chr21:-:gene:27887720:27896748;children=Zv9_00049091,Zv9_00049090,Zv9_00049092;	Zv9_00049090	lincRNA	chr21	27887720	27896748	-	9029	786	MIDDLE	2	chr21	27896282	27896366	85	85	100	10.8142	10.8142	Both_SPL	HATN10_DR	DNA/hAT	chr21	27895934	27896368	-	12.3
ID=chr21:-:gene:27887720:27896748;children=Zv9_00049091,Zv9_00049090,Zv9_00049092;	Zv9_00049091	lincRNA	chr21	27894432	27896708	-	2277	742	MIDDLE	2	chr21	27896282	27896366	85	85	100	11.4555	11.4555	Both_SPL	HATN10_DR	DNA/hAT	chr21	27895934	27896368	-	12.3
ID=chr21:-:gene:2797169:2806655;children=UL_324;	UL_324	lincRNA	chr21	2797169	2806655	-	9487	1032	LAST	4	chr21	2797169	2797832	664	79	11.8976	7.65504	31.2984	exonized	TDR16	DNA	chr21	2797556	2797634	+	13.9
ID=chr21:-:gene:2797169:2806655;children=UL_324;	UL_324	lincRNA	chr21	2797169	2806655	-	9487	1032	LAST	4	chr21	2797169	2797832	664	244	36.747	23.6434	31.2984	exonized	TDR16	DNA	chr21	2797373	2797616	-	13.9
ID=chr21:-:gene:29414119:29421614;children=UL_334;	UL_334	lincRNA	chr21	29414119	29421614	-	7496	2549	LAST	3	chr21	29414119	29416334	2216	215	9.70217	8.43468	41.5065	exonized	TDR25	DNA	chr21	29414832	29415046	-	14.7
ID=chr21:-:gene:29414119:29421614;children=UL_334;	UL_334	lincRNA	chr21	29414119	29421614	-	7496	2549	LAST	3	chr21	29414119	29416334	2216	253	11.417	9.92546	41.5065	exonized	TDR25	DNA	chr21	29414560	29414812	-	14.7
ID=chr21:-:gene:29414119:29421614;children=UL_334;	UL_334	lincRNA	chr21	29414119	29421614	-	7496	2549	LAST	3	chr21	29414119	29416334	2216	303	13.6733	11.887	41.5065	exonized	TDR16	DNA	chr21	29415307	29415609	+	13.9
ID=chr21:-:gene:29414119:29421614;children=UL_334;	UL_334	lincRNA	chr21	29414119	29421614	-	7496	2549	LAST	3	chr21	29414119	29416334	2216	287	12.9513	11.2593	41.5065	exonized	ANGEL	DNA/hAT	chr21	29415808	29416094	-	17.6
ID=chr21:-:gene:43626796:43648489;children=UL_340;	UL_340	lincRNA	chr21	43626796	43648489	-	21694	2191	LAST	6	chr21	43626796	43628130	1335	69	5.16854	3.14925	3.14925	exonized	hAT-2n1_DR	DNA/hAT-Charlie	chr21	43627272	43627340	-	13.2
ID=chr21:-:gene:5240062:5246523;children=UL_325;	UL_325	lincRNA	chr21	5240062	5246523	-	6462	6462	SINGLE	1	chr21	5240062	5246523	6462	413	6.39121	6.39121	40.4983	exonized	TDR15	DNA	chr21	5243419	5243831	+	17.2
ID=chr21:-:gene:5240062:5246523;children=UL_325;	UL_325	lincRNA	chr21	5240062	5246523	-	6462	6462	SINGLE	1	chr21	5240062	5246523	6462	427	6.60786	6.60786	40.4983	exonized	TDR15	DNA	chr21	5242746	5243172	-	17.2
ID=chr21:-:gene:5240062:5246523;children=UL_325;	UL_325	lincRNA	chr21	5240062	5246523	-	6462	6462	SINGLE	1	chr21	5240062	5246523	6462	417	6.45311	6.45311	40.4983	exonized	TDR15	DNA	chr21	5242053	5242469	-	17.2
ID=chr21:-:gene:5240062:5246523;children=UL_325;	UL_325	lincRNA	chr21	5240062	5246523	-	6462	6462	SINGLE	1	chr21	5240062	5246523	6462	49	0.758279	0.758279	40.4983	exonized	TDR15	DNA	chr21	5241592	5241640	+	17.2
ID=chr21:-:gene:5240062:5246523;children=UL_325;	UL_325	lincRNA	chr21	5240062	5246523	-	6462	6462	SINGLE	1	chr21	5240062	5246523	6462	412	6.37574	6.37574	40.4983	exonized	HATN10_DR	DNA/hAT	chr21	5241641	5242052	+	12.3
ID=chr21:-:gene:5240062:5246523;children=UL_325;	UL_325	lincRNA	chr21	5240062	5246523	-	6462	6462	SINGLE	1	chr21	5240062	5246523	6462	39	0.603528	0.603528	40.4983	exonized	EnSpm-2_DR	DNA/En-Spm	chr21	5240693	5240731	-	19.8
ID=chr21:-:gene:5240062:5246523;children=UL_325;	UL_325	lincRNA	chr21	5240062	5246523	-	6462	6462	SINGLE	1	chr21	5240062	5246523	6462	860	13.3086	13.3086	40.4983	exonized	DNA-8-11_DR	DNA/hAT	chr21	5240732	5241591	-	9.7
ID=chr21:-:gene:852212:855420;children=UL_320;	UL_320	lincRNA	chr21	852212	855420	-	3209	3209	SINGLE	1	chr21	852212	855420	3209	61	1.9009	1.9009	34.8707	exonized	hAT-N71_DR	DNA/hAT	chr21	855170	855230	-	11.6
ID=chr21:-:gene:852212:855420;children=UL_320;	UL_320	lincRNA	chr21	852212	855420	-	3209	3209	SINGLE	1	chr21	852212	855420	3209	61	1.9009	1.9009	34.8707	exonized	hAT-N71_DR	DNA/hAT	chr21	854883	854943	-	11.6
ID=chr21:-:gene:852212:855420;children=UL_320;	UL_320	lincRNA	chr21	852212	855420	-	3209	3209	SINGLE	1	chr21	852212	855420	3209	98	3.05391	3.05391	34.8707	exonized	hAT-2n1_DR	DNA/hAT-Charlie	chr21	855311	855408	+	13.2
ID=chr21:-:gene:852212:855420;children=UL_320;	UL_320	lincRNA	chr21	852212	855420	-	3209	3209	SINGLE	1	chr21	852212	855420	3209	146	4.5497	4.5497	34.8707	exonized	LOOPERN4B_DR	DNA/PiggyBac	chr21	852589	852734	+	12.4
ID=chr21:-:gene:852212:855420;children=UL_320;	UL_320	lincRNA	chr21	852212	855420	-	3209	3209	SINGLE	1	chr21	852212	855420	3209	60	1.86974	1.86974	34.8707	exonized	LOOPERN4B_DR	DNA/PiggyBac	chr21	852502	852561	+	12.4
ID=chr21:-:gene:852212:855420;children=UL_320;	UL_320	lincRNA	chr21	852212	855420	-	3209	3209	SINGLE	1	chr21	852212	855420	3209	182	5.67155	5.67155	34.8707	exonized	Kolobok-1N2_DR	DNA/Kolobok	chr21	852755	852936	+	13.3
ID=chr21:-:gene:852212:855420;children=UL_320;	UL_320	lincRNA	chr21	852212	855420	-	3209	3209	SINGLE	1	chr21	852212	855420	3209	123	3.83297	3.83297	34.8707	exonized	Gypsy-31-LTR_DR	LTR/Gypsy	chr21	854709	854831	-	18.3
ID=chr21:-:gene:852212:855420;children=UL_320;	UL_320	lincRNA	chr21	852212	855420	-	3209	3209	SINGLE	1	chr21	852212	855420	3209	200	6.23247	6.23247	34.8707	exonized	ERV1-N3-I_DR-int	LTR	chr21	855193	855392	-	20.3
ID=chr21:-:gene:852212:855420;children=UL_320;	UL_320	lincRNA	chr21	852212	855420	-	3209	3209	SINGLE	1	chr21	852212	855420	3209	188	5.85852	5.85852	34.8707	exonized	ERV1-N3-I_DR-int	LTR	chr21	854932	855119	-	20.3
ID=chr21:-:gene:9970640:9973840;children=UL_328;	UL_328	lincRNA	chr21	9970640	9973840	-	3201	1506	MIDDLE	2	chr21	9972912	9973031	120	11	9.16667	0.730412	0.730412	SPL	Kolobok-1_DR	DNA/Kolobok	chr21	9972639	9972922	-	16.7
ID=chr21:+:gene:10761892:10765890;children=Zv9_00047750;	Zv9_00047750	lincRNA	chr21	10761892	10765890	+	3999	646	FIRST	1	chr21	10761892	10761929	38	30	78.9474	4.64396	4.64396	TSS	ENSPM-6_DR	DNA/En-Spm	chr21	10761838	10761921	-	17.5
ID=chr21:+:gene:14114311:14170098;children=Zv9_00047819,Zv9_00047818;	Zv9_00047818	lincRNA	chr21	14114311	14120149	+	5839	836	LAST	4	chr21	14119628	14120149	522	94	18.0077	11.244	11.244	PolyA	TDR18	DNA/hAT-Charlie	chr21	14120056	14120291	+	10.6
ID=chr21:+:gene:16117968:16218946;children=Zv9_00047840;	Zv9_00047840	lincRNA	chr21	16117968	16218946	+	100979	1090	FIRST	1	chr21	16117968	16118110	143	101	70.6294	9.26606	9.26606	SPL	TC1DR3	DNA/TcMar-Tc1	chr21	16118010	16118728	-	10.4
ID=chr21:+:gene:19150754:19170813;children=Zv9_00047900,Zv9_00047897,Zv9_00047899,Zv9_00047898;	Zv9_00047899	lincRNA	chr21	19150757	19170784	+	20028	1839	LAST	5	chr21	19169342	19170784	1443	27	1.8711	1.46819	1.46819	PolyA	Mariner-N7_DR	DNA/TcMar	chr21	19170758	19170982	-	13.8
ID=chr21:+:gene:19150754:19170813;children=Zv9_00047900,Zv9_00047897,Zv9_00047899,Zv9_00047898;	Zv9_00047900	lincRNA	chr21	19167770	19170813	+	3044	1744	LAST	2	chr21	19169342	19170813	1472	56	3.80435	3.21101	3.21101	PolyA	Mariner-N7_DR	DNA/TcMar	chr21	19170758	19170982	-	13.8
ID=chr21:+:gene:21321673:21325597;children=Zv9_00047975,Zv9_00047974;	Zv9_00047974	lincRNA	chr21	21321673	21325597	+	3925	2526	FIRST	1	chr21	21321673	21321837	165	163	98.7879	6.45289	53.4046	SPL	DNA25TWA2_DR	DNA	chr21	21321675	21322120	-	12.1
ID=chr21:+:gene:21321673:21325597;children=Zv9_00047975,Zv9_00047974;	Zv9_00047974	lincRNA	chr21	21321673	21325597	+	3925	2526	LAST	3	chr21	21323315	21325597	2283	1186	51.9492	46.9517	53.4046	exonized	ACROBAT1	DNA	chr21	21324401	21325586	-	7.8
ID=chr21:+:gene:21321673:21325597;children=Zv9_00047975,Zv9_00047974;	Zv9_00047975	lincRNA	chr21	21321688	21325390	+	3703	2373	FIRST	1	chr21	21321688	21321837	150	150	100	6.32111	48.0405	TSS_SPL	DNA25TWA2_DR	DNA	chr21	21321675	21322120	-	12.1
ID=chr21:+:gene:21321673:21325597;children=Zv9_00047975,Zv9_00047974;	Zv9_00047975	lincRNA	chr21	21321688	21325390	+	3703	2373	LAST	4	chr21	21323315	21325390	2076	990	47.6879	41.7193	48.0405	PolyA	ACROBAT1	DNA	chr21	21324401	21325586	-	7.8
ID=chr21:+:gene:25876004:25883251;children=Zv9_00048060;	Zv9_00048060	lincRNA	chr21	25876004	25883251	+	7248	3124	LAST	2	chr21	25880695	25883251	2557	130	5.08408	4.16133	26.3764	exonized	TDR18	DNA/hAT-Charlie	chr21	25882089	25882218	+	10.6
ID=chr21:+:gene:25876004:25883251;children=Zv9_00048060;	Zv9_00048060	lincRNA	chr21	25876004	25883251	+	7248	3124	LAST	2	chr21	25880695	25883251	2557	280	10.9503	8.96287	26.3764	exonized	TDR18	DNA/hAT-Charlie	chr21	25881340	25881619	+	10.6
ID=chr21:+:gene:25876004:25883251;children=Zv9_00048060;	Zv9_00048060	lincRNA	chr21	25876004	25883251	+	7248	3124	LAST	2	chr21	25880695	25883251	2557	266	10.4028	8.51472	26.3764	exonized	HarbingerN7_DR	DNA/Harbinger	chr21	25881821	25882086	-	16.2
ID=chr21:+:gene:25876004:25883251;children=Zv9_00048060;	Zv9_00048060	lincRNA	chr21	25876004	25883251	+	7248	3124	LAST	2	chr21	25880695	25883251	2557	148	5.78803	4.73752	26.3764	exonized	HarbingerN7_DR	DNA/Harbinger	chr21	25881659	25881806	-	16.2
ID=chr21:+:gene:2680874:2685915;children=UL_322,UL_323;	UL_322	lincRNA	chr21	2680874	2685790	+	4917	1286	FIRST	1	chr21	2680874	2681011	138	138	100	10.7309	77.1384	TSS_SPL	DNA-AT-3_DR	DNA	chr21	2680814	2681097	+	19.1
ID=chr21:+:gene:2680874:2685915;children=UL_322,UL_323;	UL_322	lincRNA	chr21	2680874	2685790	+	4917	1286	LAST	2	chr21	2684643	2685790	1148	854	74.3902	66.4075	77.1384	exonized	IS4EU-2_DR	DNA/Kolobok-IS4EU	chr21	2684780	2685633	+	20.5
ID=chr21:+:gene:2680874:2685915;children=UL_322,UL_323;	UL_323	lincRNA	chr21	2680874	2685915	+	5042	1411	FIRST	1	chr21	2680874	2681011	138	138	100	9.7803	70.3047	TSS_SPL	DNA-AT-3_DR	DNA	chr21	2680814	2681097	+	19.1
ID=chr21:+:gene:2680874:2685915;children=UL_322,UL_323;	UL_323	lincRNA	chr21	2680874	2685915	+	5042	1411	LAST	2	chr21	2684643	2685915	1273	854	67.0856	60.5245	70.3047	exonized	IS4EU-2_DR	DNA/Kolobok-IS4EU	chr21	2684780	2685633	+	20.5
ID=chr21:+:gene:286441:290860;children=Zv9_00047425;	Zv9_00047425	lincRNA	chr21	286441	290860	+	4420	1756	LAST	5	chr21	289894	290860	967	102	10.5481	5.80866	5.80866	exonized	DNA-8-26_DR	DNA/hAT-Tip100?	chr21	290381	290482	-	19
ID=chr21:+:gene:32362785:32375648;children=UL_335;	UL_335	lincRNA	chr21	32362785	32375648	+	12864	843	FIRST	1	chr21	32362785	32362874	90	32	35.5556	3.79597	3.79597	TSS	DNA-1-9_DR	DNA/Harbinger?	chr21	32361282	32362816	-	12.2
ID=chr21:+:gene:38126983:38134886;children=UL_337,UL_338;	UL_337	lincRNA	chr21	38126983	38133978	+	6996	1244	FIRST	1	chr21	38126983	38127496	514	51	9.92218	4.09968	4.09968	TSS	HATN9_DR	DNA	chr21	38125980	38127033	+	7.2
ID=chr21:+:gene:38126983:38134886;children=UL_337,UL_338;	UL_338	lincRNA	chr21	38126983	38134886	+	7904	2152	FIRST	1	chr21	38126983	38127496	514	51	9.92218	2.36989	19.7491	TSS	HATN9_DR	DNA	chr21	38125980	38127033	+	7.2
ID=chr21:+:gene:38126983:38134886;children=UL_337,UL_338;	UL_338	lincRNA	chr21	38126983	38134886	+	7904	2152	LAST	2	chr21	38133249	38134886	1638	174	10.6227	8.0855	19.7491	exonized	HE1_DR1	SINE/V	chr21	38134572	38134745	-	13.2
ID=chr21:+:gene:38126983:38134886;children=UL_337,UL_338;	UL_338	lincRNA	chr21	38126983	38134886	+	7904	2152	LAST	2	chr21	38133249	38134886	1638	200	12.21	9.29368	19.7491	exonized	HE1_DR1	SINE/V	chr21	38134018	38134217	-	13.2
ID=chr21:+:gene:38720038:38726242;children=Zv9_00048292;	Zv9_00048292	lincRNA	chr21	38720038	38726242	+	6205	2813	FIRST	1	chr21	38720038	38720849	812	87	10.7143	3.09278	56.701	TSS	hAT-N78_DR	DNA/hAT-Charlie	chr21	38719812	38720124	-	6.5
ID=chr21:+:gene:38720038:38726242;children=Zv9_00048292;	Zv9_00048292	lincRNA	chr21	38720038	38726242	+	6205	2813	FIRST	1	chr21	38720038	38720849	812	96	11.8227	3.41273	56.701	exonized	IS4EU-1_DR	DNA/Kolobok-IS4EU	chr21	38720597	38720692	+	21.4
ID=chr21:+:gene:38720038:38726242;children=Zv9_00048292;	Zv9_00048292	lincRNA	chr21	38720038	38726242	+	6205	2813	FIRST	1	chr21	38720038	38720849	812	382	47.0443	13.5798	56.701	exonized	DNA8-3_DR	DNA	chr21	38720130	38720511	+	13.4
ID=chr21:+:gene:38720038:38726242;children=Zv9_00048292;	Zv9_00048292	lincRNA	chr21	38720038	38726242	+	6205	2813	FIRST	1	chr21	38720038	38720849	812	100	12.3153	3.55492	56.701	exonized	ANGEL	DNA/hAT	chr21	38720622	38720721	+	17.6
ID=chr21:+:gene:38720038:38726242;children=Zv9_00048292;	Zv9_00048292	lincRNA	chr21	38720038	38726242	+	6205	2813	LAST	2	chr21	38724242	38726242	2001	366	18.2909	13.011	56.701	exonized	hAT-N24_DR	DNA/hAT?	chr21	38724922	38725287	-	11.1
ID=chr21:+:gene:38720038:38726242;children=Zv9_00048292;	Zv9_00048292	lincRNA	chr21	38720038	38726242	+	6205	2813	LAST	2	chr21	38724242	38726242	2001	564	28.1859	20.0498	56.701	PolyA	DNA-8-9_DR	DNA/hAT-Ac?	chr21	38725679	38727184	+	18.1
ID=chr21:+:gene:40736691:40739944;children=Zv9_00048327;	Zv9_00048327	lincRNA	chr21	40736691	40739944	+	3254	3181	FIRST	1	chr21	40736691	40738461	1771	77	4.34783	2.42062	46.3376	exonized	HATN8_DR	DNA	chr21	40738379	40738455	+	12.7
ID=chr21:+:gene:40736691:40739944;children=Zv9_00048327;	Zv9_00048327	lincRNA	chr21	40736691	40739944	+	3254	3181	FIRST	1	chr21	40736691	40738461	1771	77	4.34783	2.42062	46.3376	exonized	HATN8_DR	DNA	chr21	40738306	40738382	+	12.7
ID=chr21:+:gene:40736691:40739944;children=Zv9_00048327;	Zv9_00048327	lincRNA	chr21	40736691	40739944	+	3254	3181	FIRST	1	chr21	40736691	40738461	1771	82	4.63015	2.57781	46.3376	exonized	HATN8_DR	DNA	chr21	40738228	40738309	+	12.7
ID=chr21:+:gene:40736691:40739944;children=Zv9_00048327;	Zv9_00048327	lincRNA	chr21	40736691	40739944	+	3254	3181	FIRST	1	chr21	40736691	40738461	1771	79	4.46076	2.4835	46.3376	exonized	HATN8_DR	DNA	chr21	40738085	40738163	+	12.7
ID=chr21:+:gene:40736691:40739944;children=Zv9_00048327;	Zv9_00048327	lincRNA	chr21	40736691	40739944	+	3254	3181	FIRST	1	chr21	40736691	40738461	1771	77	4.34783	2.42062	46.3376	exonized	HATN8_DR	DNA	chr21	40737939	40738015	+	12.7
ID=chr21:+:gene:40736691:40739944;children=Zv9_00048327;	Zv9_00048327	lincRNA	chr21	40736691	40739944	+	3254	3181	FIRST	1	chr21	40736691	40738461	1771	85	4.79955	2.67212	46.3376	exonized	HATN8_DR	DNA	chr21	40737858	40737942	+	12.7
ID=chr21:+:gene:40736691:40739944;children=Zv9_00048327;	Zv9_00048327	lincRNA	chr21	40736691	40739944	+	3254	3181	FIRST	1	chr21	40736691	40738461	1771	101	5.70299	3.1751	46.3376	exonized	HATN8_DR	DNA	chr21	40737686	40737786	+	12.7
ID=chr21:+:gene:40736691:40739944;children=Zv9_00048327;	Zv9_00048327	lincRNA	chr21	40736691	40739944	+	3254	3181	FIRST	1	chr21	40736691	40738461	1771	77	4.34783	2.42062	46.3376	exonized	HATN8_DR	DNA	chr21	40737617	40737693	+	12.7
ID=chr21:+:gene:40736691:40739944;children=Zv9_00048327;	Zv9_00048327	lincRNA	chr21	40736691	40739944	+	3254	3181	FIRST	1	chr21	40736691	40738461	1771	88	4.96894	2.76643	46.3376	exonized	HATN8_DR	DNA	chr21	40737533	40737620	+	12.7
ID=chr21:+:gene:40736691:40739944;children=Zv9_00048327;	Zv9_00048327	lincRNA	chr21	40736691	40739944	+	3254	3181	FIRST	1	chr21	40736691	40738461	1771	91	5.13834	2.86074	46.3376	exonized	HATN8_DR	DNA	chr21	40737383	40737473	+	12.7
ID=chr21:+:gene:40736691:40739944;children=Zv9_00048327;	Zv9_00048327	lincRNA	chr21	40736691	40739944	+	3254	3181	FIRST	1	chr21	40736691	40738461	1771	88	4.96894	2.76643	46.3376	exonized	HATN8_DR	DNA	chr21	40737299	40737386	+	12.7
ID=chr21:+:gene:40736691:40739944;children=Zv9_00048327;	Zv9_00048327	lincRNA	chr21	40736691	40739944	+	3254	3181	FIRST	1	chr21	40736691	40738461	1771	70	3.95257	2.20057	46.3376	exonized	HATN8_DR	DNA	chr21	40737227	40737296	+	12.7
ID=chr21:+:gene:40736691:40739944;children=Zv9_00048327;	Zv9_00048327	lincRNA	chr21	40736691	40739944	+	3254	3181	FIRST	1	chr21	40736691	40738461	1771	80	4.51722	2.51493	46.3376	exonized	HATN8_DR	DNA	chr21	40736970	40737049	+	12.7
ID=chr21:+:gene:40736691:40739944;children=Zv9_00048327;	Zv9_00048327	lincRNA	chr21	40736691	40739944	+	3254	3181	FIRST	1	chr21	40736691	40738461	1771	76	4.29136	2.38919	46.3376	exonized	HATN8_DR	DNA	chr21	40736927	40737002	+	12.7
ID=chr21:+:gene:40736691:40739944;children=Zv9_00048327;	Zv9_00048327	lincRNA	chr21	40736691	40739944	+	3254	3181	FIRST	1	chr21	40736691	40738461	1771	61	3.44438	1.91764	46.3376	exonized	HATN8_DR	DNA	chr21	40736854	40736914	+	12.7
ID=chr21:+:gene:40736691:40739944;children=Zv9_00048327;	Zv9_00048327	lincRNA	chr21	40736691	40739944	+	3254	3181	FIRST	1	chr21	40736691	40738461	1771	70	3.95257	2.20057	46.3376	exonized	HATN8_DR	DNA	chr21	40736781	40736850	+	12.7
ID=chr21:+:gene:40736691:40739944;children=Zv9_00048327;	Zv9_00048327	lincRNA	chr21	40736691	40739944	+	3254	3181	LAST	2	chr21	40738535	40739944	1410	130	9.21986	4.08677	46.3376	PolyA	HarbingerN6_DR	DNA/Harbinger	chr21	40739815	40739998	-	14.9
ID=chr21:+:gene:40736691:40739944;children=Zv9_00048327;	Zv9_00048327	lincRNA	chr21	40736691	40739944	+	3254	3181	LAST	2	chr21	40738535	40739944	1410	65	4.60993	2.04338	46.3376	exonized	HATN8_DR	DNA	chr21	40738713	40738777	+	12.7
ID=chr21:+:gene:41373274:41390573;children=Zv9_00048330;	Zv9_00048330	lincRNA	chr21	41373274	41390573	+	17300	1982	LAST	3	chr21	41388979	41390573	1595	57	3.57367	2.87588	25.0757	PolyA	Kolobok-N1_DR	DNA/Kolobok?	chr21	41390517	41390610	+	15.1
ID=chr21:+:gene:41373274:41390573;children=Zv9_00048330;	Zv9_00048330	lincRNA	chr21	41373274	41390573	+	17300	1982	LAST	3	chr21	41388979	41390573	1595	124	7.77429	6.25631	25.0757	exonized	Kolobok-N1_DR	DNA/Kolobok?	chr21	41390178	41390301	+	15.1
ID=chr21:+:gene:41373274:41390573;children=Zv9_00048330;	Zv9_00048330	lincRNA	chr21	41373274	41390573	+	17300	1982	LAST	3	chr21	41388979	41390573	1595	174	10.9091	8.77901	25.0757	exonized	Kolobok-N1_DR	DNA/Kolobok?	chr21	41389791	41389964	+	15.1
ID=chr21:+:gene:41373274:41390573;children=Zv9_00048330;	Zv9_00048330	lincRNA	chr21	41373274	41390573	+	17300	1982	LAST	3	chr21	41388979	41390573	1595	142	8.90282	7.16448	25.0757	exonized	Kolobok-N1_DR	DNA/Kolobok?	chr21	41389452	41389593	+	15.1
ID=chr21:+:gene:42299259:42302165;children=Zv9_00048360;	Zv9_00048360	lincRNA	chr21	42299259	42302165	+	2907	2764	FIRST	1	chr21	42299259	42300996	1738	42	2.41657	1.51954	58.9363	TSS	hAT-N53_DR	DNA/hAT?	chr21	42299229	42299300	-	15.5
ID=chr21:+:gene:42299259:42302165;children=Zv9_00048360;	Zv9_00048360	lincRNA	chr21	42299259	42302165	+	2907	2764	FIRST	1	chr21	42299259	42300996	1738	139	7.9977	5.02894	58.9363	exonized	Kolobok-N1_DR	DNA/Kolobok?	chr21	42300851	42300989	+	15.1
ID=chr21:+:gene:42299259:42302165;children=Zv9_00048360;	Zv9_00048360	lincRNA	chr21	42299259	42302165	+	2907	2764	FIRST	1	chr21	42299259	42300996	1738	115	6.6168	4.16064	58.9363	exonized	Kolobok-N1_DR	DNA/Kolobok?	chr21	42300733	42300847	+	15.1
ID=chr21:+:gene:42299259:42302165;children=Zv9_00048360;	Zv9_00048360	lincRNA	chr21	42299259	42302165	+	2907	2764	FIRST	1	chr21	42299259	42300996	1738	134	7.71001	4.84805	58.9363	exonized	Kolobok-N1_DR	DNA/Kolobok?	chr21	42300602	42300735	-	15.1
ID=chr21:+:gene:42299259:42302165;children=Zv9_00048360;	Zv9_00048360	lincRNA	chr21	42299259	42302165	+	2907	2764	FIRST	1	chr21	42299259	42300996	1738	182	10.4718	6.58466	58.9363	exonized	Kolobok-N1_DR	DNA/Kolobok?	chr21	42300408	42300589	+	15.1
ID=chr21:+:gene:42299259:42302165;children=Zv9_00048360;	Zv9_00048360	lincRNA	chr21	42299259	42302165	+	2907	2764	FIRST	1	chr21	42299259	42300996	1738	23	1.32336	0.832127	58.9363	TSS	ERV1-N1-I_DR-int	LTR/ERV1	chr21	42299135	42299281	+	17.1
ID=chr21:+:gene:42299259:42302165;children=Zv9_00048360;	Zv9_00048360	lincRNA	chr21	42299259	42302165	+	2907	2764	LAST	2	chr21	42301140	42302165	1026	123	11.9883	4.45007	58.9363	exonized	Kolobok-N1_DR	DNA/Kolobok?	chr21	42302012	42302134	-	15.1
ID=chr21:+:gene:42299259:42302165;children=Zv9_00048360;	Zv9_00048360	lincRNA	chr21	42299259	42302165	+	2907	2764	LAST	2	chr21	42301140	42302165	1026	66	6.43275	2.38784	58.9363	exonized	Kolobok-N1_DR	DNA/Kolobok?	chr21	42302007	42302072	+	15.1
ID=chr21:+:gene:42299259:42302165;children=Zv9_00048360;	Zv9_00048360	lincRNA	chr21	42299259	42302165	+	2907	2764	LAST	2	chr21	42301140	42302165	1026	135	13.1579	4.88423	58.9363	exonized	Kolobok-N1_DR	DNA/Kolobok?	chr21	42301863	42301997	+	15.1
ID=chr21:+:gene:42299259:42302165;children=Zv9_00048360;	Zv9_00048360	lincRNA	chr21	42299259	42302165	+	2907	2764	LAST	2	chr21	42301140	42302165	1026	131	12.768	4.73951	58.9363	exonized	Kolobok-N1_DR	DNA/Kolobok?	chr21	42301721	42301851	+	15.1
ID=chr21:+:gene:42299259:42302165;children=Zv9_00048360;	Zv9_00048360	lincRNA	chr21	42299259	42302165	+	2907	2764	LAST	2	chr21	42301140	42302165	1026	136	13.2554	4.92041	58.9363	exonized	Kolobok-N1_DR	DNA/Kolobok?	chr21	42301576	42301711	+	15.1
ID=chr21:+:gene:42299259:42302165;children=Zv9_00048360;	Zv9_00048360	lincRNA	chr21	42299259	42302165	+	2907	2764	LAST	2	chr21	42301140	42302165	1026	136	13.2554	4.92041	58.9363	exonized	Kolobok-N1_DR	DNA/Kolobok?	chr21	42301431	42301566	+	15.1
ID=chr21:+:gene:42299259:42302165;children=Zv9_00048360;	Zv9_00048360	lincRNA	chr21	42299259	42302165	+	2907	2764	LAST	2	chr21	42301140	42302165	1026	135	13.1579	4.88423	58.9363	exonized	Kolobok-N1_DR	DNA/Kolobok?	chr21	42301287	42301421	+	15.1
ID=chr21:+:gene:42299259:42302165;children=Zv9_00048360;	Zv9_00048360	lincRNA	chr21	42299259	42302165	+	2907	2764	LAST	2	chr21	42301140	42302165	1026	132	12.8655	4.77569	58.9363	exonized	Kolobok-N1_DR	DNA/Kolobok?	chr21	42301146	42301277	-	15.1
ID=chr21:+:gene:42554973:42556475;children=UL_339;	UL_339	lincRNA	chr21	42554973	42556475	+	1503	1503	SINGLE	1	chr21	42554973	42556475	1503	217	14.4378	14.4378	29.0086	exonized	Mariner-N1_DR	DNA/TcMar	chr21	42555843	42556059	+	15.5
ID=chr21:+:gene:42554973:42556475;children=UL_339;	UL_339	lincRNA	chr21	42554973	42556475	+	1503	1503	SINGLE	1	chr21	42554973	42556475	1503	67	4.45775	4.45775	29.0086	exonized	ENSPM-6_DR	DNA/En-Spm	chr21	42556007	42556073	+	17.5
ID=chr21:+:gene:42554973:42556475;children=UL_339;	UL_339	lincRNA	chr21	42554973	42556475	+	1503	1503	SINGLE	1	chr21	42554973	42556475	1503	88	5.85496	5.85496	29.0086	exonized	DNA8-1_DR	DNA/hAT-Ac	chr21	42556096	42556183	-	16.4
ID=chr21:+:gene:42554973:42556475;children=UL_339;	UL_339	lincRNA	chr21	42554973	42556475	+	1503	1503	SINGLE	1	chr21	42554973	42556475	1503	64	4.25815	4.25815	29.0086	exonized	DNA-6-N5_DR	DNA	chr21	42555753	42555816	+	17.4
ID=chr21:+:gene:6072255:6080396;children=UL_326;	UL_326	lincRNA	chr21	6072255	6080396	+	8142	2081	LAST	4	chr21	6078556	6080396	1841	43	2.33569	2.06631	59.4906	exonized	TE-X-4_DR	Unknown	chr21	6080344	6080386	-	17.1
ID=chr21:+:gene:6072255:6080396;children=UL_326;	UL_326	lincRNA	chr21	6072255	6080396	+	8142	2081	LAST	4	chr21	6078556	6080396	1841	137	7.44161	6.58337	59.4906	exonized	PROTOP1_DR	DNA/P	chr21	6079106	6079242	-	7.6
ID=chr21:+:gene:6072255:6080396;children=UL_326;	UL_326	lincRNA	chr21	6072255	6080396	+	8142	2081	LAST	4	chr21	6078556	6080396	1841	743	40.3585	35.704	59.4906	exonized	HarbingerN3_DR	DNA/Harbinger	chr21	6079601	6080343	-	10.2
ID=chr21:+:gene:6072255:6080396;children=UL_326;	UL_326	lincRNA	chr21	6072255	6080396	+	8142	2081	LAST	4	chr21	6078556	6080396	1841	181	9.83161	8.69774	59.4906	exonized	HarbingerN3_DR	DNA/Harbinger	chr21	6079240	6079420	-	10.2
ID=chr21:+:gene:6072255:6080396;children=UL_326;	UL_326	lincRNA	chr21	6072255	6080396	+	8142	2081	LAST	4	chr21	6078556	6080396	1841	134	7.27865	6.43921	59.4906	exonized	HarbingerN3_DR	DNA/Harbinger	chr21	6078972	6079105	-	10.2
ID=chr22:-:gene:1326337:1329836;children=Zv9_00050547;	Zv9_00050547	lincRNA	chr22	1326337	1329836	-	3500	1316	LAST	2	chr22	1326337	1327606	1270	44	3.46457	3.34347	36.0182	exonized	LOOPERN1_DR	DNA/PiggyBac?	chr22	1326565	1326608	-	6.6
ID=chr22:-:gene:1326337:1329836;children=Zv9_00050547;	Zv9_00050547	lincRNA	chr22	1326337	1329836	-	3500	1316	LAST	2	chr22	1326337	1327606	1270	163	12.8346	12.386	36.0182	exonized	DNA-TTAA-2_DR	DNA/PiggyBac?	chr22	1326404	1326566	+	12.8
ID=chr22:-:gene:1326337:1329836;children=Zv9_00050547;	Zv9_00050547	lincRNA	chr22	1326337	1329836	-	3500	1316	LAST	2	chr22	1326337	1327606	1270	140	11.0236	10.6383	36.0182	exonized	DNA-2-20_DR	DNA/En-Spm?	chr22	1326780	1326919	-	19.3
ID=chr22:-:gene:1326337:1329836;children=Zv9_00050547;	Zv9_00050547	lincRNA	chr22	1326337	1329836	-	3500	1316	LAST	2	chr22	1326337	1327606	1270	60	4.72441	4.55927	36.0182	exonized	CR1-4_DR	LINE/L2	chr22	1326727	1326786	+	14.1
ID=chr22:-:gene:1326337:1329836;children=Zv9_00050547;	Zv9_00050547	lincRNA	chr22	1326337	1329836	-	3500	1316	LAST	2	chr22	1326337	1327606	1270	67	5.27559	5.09119	36.0182	PolyA	ACROBAT1	DNA	chr22	1325886	1326403	+	7.8
ID=chr22:-:gene:13415958:13489531;children=UL_350;	UL_350	lincRNA	chr22	13415958	13489531	-	73574	6585	LAST	7	chr22	13415958	13422011	6054	60	0.99108	0.911162	62.9461	exonized	hAT-N38_DR	DNA/hAT-Blackjack	chr22	13419439	13419498	+	12.5
ID=chr22:-:gene:13415958:13489531;children=UL_350;	UL_350	lincRNA	chr22	13415958	13489531	-	73574	6585	LAST	7	chr22	13415958	13422011	6054	341	5.63264	5.17844	62.9461	exonized	TE-X-4_DR	Unknown	chr22	13419794	13420134	-	17.1
ID=chr22:-:gene:13415958:13489531;children=UL_350;	UL_350	lincRNA	chr22	13415958	13489531	-	73574	6585	LAST	7	chr22	13415958	13422011	6054	479	7.91212	7.27411	62.9461	exonized	TDR18	DNA/hAT-Charlie	chr22	13420894	13421372	+	10.6
ID=chr22:-:gene:13415958:13489531;children=UL_350;	UL_350	lincRNA	chr22	13415958	13489531	-	73574	6585	LAST	7	chr22	13415958	13422011	6054	718	11.8599	10.9036	62.9461	exonized	TDR13B	DNA	chr22	13420176	13420893	+	15.3
ID=chr22:-:gene:13415958:13489531;children=UL_350;	UL_350	lincRNA	chr22	13415958	13489531	-	73574	6585	LAST	7	chr22	13415958	13422011	6054	710	11.7278	10.7821	62.9461	exonized	TDR13	DNA	chr22	13417499	13418208	+	15.4
ID=chr22:-:gene:13415958:13489531;children=UL_350;	UL_350	lincRNA	chr22	13415958	13489531	-	73574	6585	LAST	7	chr22	13415958	13422011	6054	324	5.35183	4.92027	62.9461	exonized	TC1DR2	DNA/TcMar-Tc1	chr22	13417176	13417499	+	11.8
ID=chr22:-:gene:13415958:13489531;children=UL_350;	UL_350	lincRNA	chr22	13415958	13489531	-	73574	6585	LAST	7	chr22	13415958	13422011	6054	473	7.81302	7.18299	62.9461	exonized	TC1DR2	DNA/TcMar-Tc1	chr22	13416618	13417090	+	11.8
ID=chr22:-:gene:13415958:13489531;children=UL_350;	UL_350	lincRNA	chr22	13415958	13489531	-	73574	6585	LAST	7	chr22	13415958	13422011	6054	481	7.94516	7.30448	62.9461	exonized	SINE3-1	SINE/5S	chr22	13418732	13419212	-	9.52
ID=chr22:-:gene:13415958:13489531;children=UL_350;	UL_350	lincRNA	chr22	13415958	13489531	-	73574	6585	LAST	7	chr22	13415958	13422011	6054	53	0.875454	0.80486	62.9461	exonized	Helitron-N3_DR	DNA/Helitron	chr22	13420123	13420175	+	14.5
ID=chr22:-:gene:13415958:13489531;children=UL_350;	UL_350	lincRNA	chr22	13415958	13489531	-	73574	6585	LAST	7	chr22	13415958	13422011	6054	105	1.73439	1.59453	62.9461	exonized	DNA2-3_DR	DNA/hAT?	chr22	13418624	13418728	-	12
ID=chr22:-:gene:13415958:13489531;children=UL_350;	UL_350	lincRNA	chr22	13415958	13489531	-	73574	6585	LAST	7	chr22	13415958	13422011	6054	52	0.858936	0.789674	62.9461	exonized	DNA-8-35_DR	DNA/hAT-Tip100?	chr22	13417124	13417175	+	13.3
ID=chr22:-:gene:13415958:13489531;children=UL_350;	UL_350	lincRNA	chr22	13415958	13489531	-	73574	6585	LAST	7	chr22	13415958	13422011	6054	287	4.74067	4.35839	62.9461	exonized	DNA-2-20_DR	DNA/En-Spm?	chr22	13421374	13421660	-	19.3
ID=chr22:-:gene:13415958:13489531;children=UL_350;	UL_350	lincRNA	chr22	13415958	13489531	-	73574	6585	LAST	7	chr22	13415958	13422011	6054	62	1.02412	0.941534	62.9461	exonized	CR1-1_DR	LINE/L2	chr22	13419249	13419310	-	9.8
ID=chr22:-:gene:25814418:25817096;children=Zv9_00051142,Zv9_00051141,Zv9_00051139,Zv9_00051140;	Zv9_00051140	lincRNA	chr22	25814418	25817096	-	2679	727	LAST	4	chr22	25814418	25814922	505	84	16.6337	11.5543	20.4952	exonized	TE-X-4_DR	Unknown	chr22	25814620	25814703	+	17.1
ID=chr22:-:gene:25814418:25817096;children=Zv9_00051142,Zv9_00051141,Zv9_00051139,Zv9_00051140;	Zv9_00051140	lincRNA	chr22	25814418	25817096	-	2679	727	LAST	4	chr22	25814418	25814922	505	65	12.8713	8.94085	20.4952	PolyA	ANGEL	DNA/hAT	chr22	25814364	25814482	+	17.6
ID=chr22:-:gene:25814418:25817096;children=Zv9_00051142,Zv9_00051141,Zv9_00051140,Zv9_00051139;	Zv9_00051139	lincRNA	chr22	25814418	25817096	-	2679	711	LAST	4	chr22	25814418	25814922	505	84	16.6337	11.8143	20.9564	exonized	TE-X-4_DR	Unknown	chr22	25814620	25814703	+	17.1
ID=chr22:-:gene:25814418:25817096;children=Zv9_00051142,Zv9_00051141,Zv9_00051140,Zv9_00051139;	Zv9_00051139	lincRNA	chr22	25814418	25817096	-	2679	711	LAST	4	chr22	25814418	25814922	505	65	12.8713	9.14205	20.9564	PolyA	ANGEL	DNA/hAT	chr22	25814364	25814482	+	17.6
ID=chr22:-:gene:41797059:41840513;children=Zv9_00051377;	Zv9_00051377	lincRNA	chr22	41797059	41840513	-	43455	1167	MIDDLE	5	chr22	41831356	41831458	103	89	86.4078	7.62639	16.3668	SPL	HE1_DR1	SINE/V	chr22	41831370	41831498	+	13.2
ID=chr22:-:gene:41797059:41840513;children=Zv9_00051377;	Zv9_00051377	lincRNA	chr22	41797059	41840513	-	43455	1167	MIDDLE	5	chr22	41831356	41831458	103	69	66.9903	5.9126	16.3668	SPL	EnSpm-6N1_DR	DNA/En-Spm	chr22	41831390	41831516	-	16.4
ID=chr22:-:gene:41797059:41840513;children=Zv9_00051377;	Zv9_00051377	lincRNA	chr22	41797059	41840513	-	43455	1167	MIDDLE	5	chr22	41831356	41831458	103	33	32.0388	2.82776	16.3668	SPL	DNA-X-3_DR	DNA	chr22	41831426	41831539	+	15.6
ID=chr22:-:gene:6451501:6453464;children=Zv9_00050673;	Zv9_00050673	lincRNA	chr22	6451501	6453464	-	1964	1893	FIRST	1	chr22	6451785	6453464	1680	69	4.10714	3.64501	51.2942	TSS	Helitron-1_DR	DNA/Helitron	chr22	6453396	6453494	-	17.5
ID=chr22:-:gene:6451501:6453464;children=Zv9_00050673;	Zv9_00050673	lincRNA	chr22	6451501	6453464	-	1964	1893	FIRST	1	chr22	6451785	6453464	1680	627	37.3214	33.122	51.2942	SPL	DNA2-5_DR	DNA	chr22	6451599	6452411	+	13.8
ID=chr22:-:gene:6451501:6453464;children=Zv9_00050673;	Zv9_00050673	lincRNA	chr22	6451501	6453464	-	1964	1893	FIRST	1	chr22	6451785	6453464	1680	90	5.35714	4.75436	51.2942	exonized	DNA-5-8_DR	DNA	chr22	6452983	6453072	-	17.2
ID=chr22:-:gene:6451501:6453464;children=Zv9_00050673;	Zv9_00050673	lincRNA	chr22	6451501	6453464	-	1964	1893	LAST	2	chr22	6451501	6451713	213	70	32.8638	3.69783	51.2942	PolyA	DNA8-6_DR	DNA/hAT	chr22	6450503	6451570	-	2.6
ID=chr22:-:gene:6451501:6453464;children=Zv9_00050673;	Zv9_00050673	lincRNA	chr22	6451501	6453464	-	1964	1893	LAST	2	chr22	6451501	6451713	213	115	53.9906	6.07501	51.2942	SPL	DNA2-5_DR	DNA	chr22	6451599	6452411	+	13.8
ID=chr22:-:gene:8178504:8191292;children=UL_347;	UL_347	lincRNA	chr22	8178504	8191292	-	12789	1600	FIRST	1	chr22	8190896	8191292	397	43	10.8312	2.6875	2.6875	TSS	Copia-7-LTR_DR	LTR/Gypsy?	chr22	8191250	8191604	-	21.4
ID=chr22:-:gene:9259050:9262264;children=UL_349;	UL_349	lincRNA	chr22	9259050	9262264	-	3215	3215	SINGLE	1	chr22	9259050	9262264	3215	257	7.99378	7.99378	61.7107	exonized	TE-X-4_DR	Unknown	chr22	9260455	9260711	-	17.1
ID=chr22:-:gene:9259050:9262264;children=UL_349;	UL_349	lincRNA	chr22	9259050	9262264	-	3215	3215	SINGLE	1	chr22	9259050	9262264	3215	92	2.86159	2.86159	61.7107	exonized	TC1DR2	DNA/TcMar-Tc1	chr22	9259507	9259598	-	11.8
ID=chr22:-:gene:9259050:9262264;children=UL_349;	UL_349	lincRNA	chr22	9259050	9262264	-	3215	3215	SINGLE	1	chr22	9259050	9262264	3215	73	2.27061	2.27061	61.7107	exonized	TC1DR2	DNA/TcMar-Tc1	chr22	9259383	9259455	+	11.8
ID=chr22:-:gene:9259050:9262264;children=UL_349;	UL_349	lincRNA	chr22	9259050	9262264	-	3215	3215	SINGLE	1	chr22	9259050	9262264	3215	60	1.86625	1.86625	61.7107	exonized	SINE_DR1	SINE	chr22	9260388	9260447	-	13.1
ID=chr22:-:gene:9259050:9262264;children=UL_349;	UL_349	lincRNA	chr22	9259050	9262264	-	3215	3215	SINGLE	1	chr22	9259050	9262264	3215	49	1.52411	1.52411	61.7107	exonized	Kolobok-N4_DR	DNA/Kolobok	chr22	9261887	9261935	+	18.7
ID=chr22:-:gene:9259050:9262264;children=UL_349;	UL_349	lincRNA	chr22	9259050	9262264	-	3215	3215	SINGLE	1	chr22	9259050	9262264	3215	147	4.57232	4.57232	61.7107	exonized	HE1_DR1	SINE/V	chr22	9260566	9260712	+	13.2
ID=chr22:-:gene:9259050:9262264;children=UL_349;	UL_349	lincRNA	chr22	9259050	9262264	-	3215	3215	SINGLE	1	chr22	9259050	9262264	3215	499	15.521	15.521	61.7107	exonized	DNA-10-1_DR	DNA	chr22	9261394	9261892	+	7.1
ID=chr22:-:gene:9259050:9262264;children=UL_349;	UL_349	lincRNA	chr22	9259050	9262264	-	3215	3215	SINGLE	1	chr22	9259050	9262264	3215	142	4.4168	4.4168	61.7107	exonized	DIRS-4N2_DR	LTR/Ngaro	chr22	9260424	9260565	+	15.9
ID=chr22:-:gene:9259050:9262264;children=UL_349;	UL_349	lincRNA	chr22	9259050	9262264	-	3215	3215	SINGLE	1	chr22	9259050	9262264	3215	665	20.6843	20.6843	61.7107	exonized	CR1-5_DR	LINE/L2	chr22	9259602	9260266	-	12.2
ID=chr22:+:gene:1438607:1449649;children=Zv9_00049563;	Zv9_00049563	lincRNA	chr22	1438607	1449649	+	11043	1726	FIRST	1	chr22	1438607	1439813	1207	819	67.8542	47.4508	60.7764	TSS	DNA-2-4_DR	DNA	chr22	1438039	1439425	+	16.1
ID=chr22:+:gene:1438607:1449649;children=Zv9_00049563;	Zv9_00049563	lincRNA	chr22	1438607	1449649	+	11043	1726	LAST	2	chr22	1449131	1449649	519	230	44.316	13.3256	60.7764	exonized	CR1-5_DR	LINE/L2	chr22	1449232	1449461	+	12.2
ID=chr22:+:gene:1480264:1481737;children=Zv9_00049571;	Zv9_00049571	lincRNA	chr22	1480264	1481737	+	1474	1090	FIRST	1	chr22	1480264	1480871	608	58	9.53947	5.3211	9.44954	TSS	LOOPERN6_DR	DNA/PiggyBac	chr22	1480132	1480321	-	14.3
ID=chr22:+:gene:1480264:1481737;children=Zv9_00049571;	Zv9_00049571	lincRNA	chr22	1480264	1481737	+	1474	1090	FIRST	1	chr22	1480264	1480871	608	45	7.40132	4.12844	9.44954	exonized	DNA-8-14_DR	DNA/hAT-Charlie	chr22	1480560	1480604	-	11.4
ID=chr22:+:gene:1845321:1864245;children=Zv9_00049609;	Zv9_00049609	lincRNA	chr22	1845321	1864245	+	18925	1105	FIRST	1	chr22	1845321	1845619	299	155	51.8395	14.0271	44.8869	SPL	DNAX-1_DR	DNA	chr22	1845465	1845683	-	16.9
ID=chr22:+:gene:1845321:1864245;children=Zv9_00049609;	Zv9_00049609	lincRNA	chr22	1845321	1864245	+	18925	1105	FIRST	1	chr22	1845321	1845619	299	132	44.1472	11.9457	44.8869	TSS	DNAX-1_DR	DNA	chr22	1845285	1845452	-	16.9
ID=chr22:+:gene:1845321:1864245;children=Zv9_00049609;	Zv9_00049609	lincRNA	chr22	1845321	1864245	+	18925	1105	LAST	2	chr22	1863440	1864245	806	209	25.9305	18.914	44.8869	SPL	DNAX-1_DR	DNA	chr22	1863325	1863648	-	16.9
ID=chr22:+:gene:23088794:23091065;children=Zv9_00050186;	Zv9_00050186	lincRNA	chr22	23088794	23091065	+	2272	1110	LAST	2	chr22	23090203	23091065	863	65	7.53187	5.85586	5.85586	PolyA	DNA13TA1_DR	DNA/TcMar-Tc1	chr22	23091001	23091158	+	15.4
ID=chr22:+:gene:25804268:25806998;children=Zv9_00050228,Zv9_00050226,Zv9_00050227,Zv9_00050229;	Zv9_00050226	lincRNA	chr22	25804268	25806998	+	2731	1621	MIDDLE	4	chr22	25805512	25805958	447	84	18.7919	5.18199	43.6151	exonized	TE-X-4_DR	Unknown	chr22	25805739	25805822	-	17.1
ID=chr22:+:gene:25804268:25806998;children=Zv9_00050228,Zv9_00050226,Zv9_00050227,Zv9_00050229;	Zv9_00050226	lincRNA	chr22	25804268	25806998	+	2731	1621	LAST	5	chr22	25806046	25806998	953	76	7.97482	4.68846	43.6151	exonized	TDR9	DNA	chr22	25806768	25806843	-	14.5
ID=chr22:+:gene:25804268:25806998;children=Zv9_00050228,Zv9_00050226,Zv9_00050227,Zv9_00050229;	Zv9_00050226	lincRNA	chr22	25804268	25806998	+	2731	1621	LAST	5	chr22	25806046	25806998	953	163	17.1039	10.0555	43.6151	exonized	EnSpm-N6_DR	DNA/En-Spm?	chr22	25806418	25806580	+	12.9
ID=chr22:+:gene:25804268:25806998;children=Zv9_00050228,Zv9_00050226,Zv9_00050227,Zv9_00050229;	Zv9_00050226	lincRNA	chr22	25804268	25806998	+	2731	1621	LAST	5	chr22	25806046	25806998	953	278	29.171	17.1499	43.6151	exonized	EnSpm-N6_DR	DNA/En-Spm?	chr22	25806286	25806563	-	12.9
ID=chr22:+:gene:25804268:25806998;children=Zv9_00050228,Zv9_00050226,Zv9_00050227,Zv9_00050229;	Zv9_00050226	lincRNA	chr22	25804268	25806998	+	2731	1621	LAST	5	chr22	25806046	25806998	953	73	7.66002	4.50339	43.6151	exonized	ERV1-N1-LTR_DR	LTR/ERV1	chr22	25806695	25806767	+	12.7
ID=chr22:+:gene:25804268:25806998;children=Zv9_00050228,Zv9_00050226,Zv9_00050227,Zv9_00050229;	Zv9_00050226	lincRNA	chr22	25804268	25806998	+	2731	1621	LAST	5	chr22	25806046	25806998	953	33	3.46275	2.03578	43.6151	SPL	ANGEL	DNA/hAT	chr22	25805960	25806078	-	17.6
ID=chr22:+:gene:25804268:25806998;children=Zv9_00050228,Zv9_00050226,Zv9_00050227,Zv9_00050229;	Zv9_00050227	lincRNA	chr22	25804268	25806998	+	2731	1605	MIDDLE	4	chr22	25805512	25805958	447	84	18.7919	5.23364	44.0498	exonized	TE-X-4_DR	Unknown	chr22	25805739	25805822	-	17.1
ID=chr22:+:gene:25804268:25806998;children=Zv9_00050228,Zv9_00050226,Zv9_00050227,Zv9_00050229;	Zv9_00050227	lincRNA	chr22	25804268	25806998	+	2731	1605	LAST	5	chr22	25806046	25806998	953	76	7.97482	4.7352	44.0498	exonized	TDR9	DNA	chr22	25806768	25806843	-	14.5
ID=chr22:+:gene:25804268:25806998;children=Zv9_00050228,Zv9_00050226,Zv9_00050227,Zv9_00050229;	Zv9_00050227	lincRNA	chr22	25804268	25806998	+	2731	1605	LAST	5	chr22	25806046	25806998	953	163	17.1039	10.1558	44.0498	exonized	EnSpm-N6_DR	DNA/En-Spm?	chr22	25806418	25806580	+	12.9
ID=chr22:+:gene:25804268:25806998;children=Zv9_00050228,Zv9_00050226,Zv9_00050227,Zv9_00050229;	Zv9_00050227	lincRNA	chr22	25804268	25806998	+	2731	1605	LAST	5	chr22	25806046	25806998	953	278	29.171	17.3209	44.0498	exonized	EnSpm-N6_DR	DNA/En-Spm?	chr22	25806286	25806563	-	12.9
ID=chr22:+:gene:25804268:25806998;children=Zv9_00050228,Zv9_00050226,Zv9_00050227,Zv9_00050229;	Zv9_00050227	lincRNA	chr22	25804268	25806998	+	2731	1605	LAST	5	chr22	25806046	25806998	953	73	7.66002	4.54829	44.0498	exonized	ERV1-N1-LTR_DR	LTR/ERV1	chr22	25806695	25806767	+	12.7
ID=chr22:+:gene:25804268:25806998;children=Zv9_00050228,Zv9_00050226,Zv9_00050227,Zv9_00050229;	Zv9_00050227	lincRNA	chr22	25804268	25806998	+	2731	1605	LAST	5	chr22	25806046	25806998	953	33	3.46275	2.05607	44.0498	SPL	ANGEL	DNA/hAT	chr22	25805960	25806078	-	17.6
ID=chr22:+:gene:25804268:25806998;children=Zv9_00050228,Zv9_00050226,Zv9_00050227,Zv9_00050229;	Zv9_00050228	lincRNA	chr22	25804285	25806767	+	2483	1444	LAST	4	chr22	25805512	25806767	1256	84	6.6879	5.81717	49.6537	exonized	TE-X-4_DR	Unknown	chr22	25805739	25805822	-	17.1
ID=chr22:+:gene:25804268:25806998;children=Zv9_00050228,Zv9_00050226,Zv9_00050227,Zv9_00050229;	Zv9_00050228	lincRNA	chr22	25804285	25806767	+	2483	1444	LAST	4	chr22	25805512	25806767	1256	163	12.9777	11.2881	49.6537	exonized	EnSpm-N6_DR	DNA/En-Spm?	chr22	25806418	25806580	+	12.9
ID=chr22:+:gene:25804268:25806998;children=Zv9_00050228,Zv9_00050226,Zv9_00050227,Zv9_00050229;	Zv9_00050228	lincRNA	chr22	25804285	25806767	+	2483	1444	LAST	4	chr22	25805512	25806767	1256	278	22.1338	19.2521	49.6537	exonized	EnSpm-N6_DR	DNA/En-Spm?	chr22	25806286	25806563	-	12.9
ID=chr22:+:gene:25804268:25806998;children=Zv9_00050228,Zv9_00050226,Zv9_00050227,Zv9_00050229;	Zv9_00050228	lincRNA	chr22	25804285	25806767	+	2483	1444	LAST	4	chr22	25805512	25806767	1256	73	5.8121	5.0554	49.6537	exonized	ERV1-N1-LTR_DR	LTR/ERV1	chr22	25806695	25806767	+	12.7
ID=chr22:+:gene:25804268:25806998;children=Zv9_00050228,Zv9_00050226,Zv9_00050227,Zv9_00050229;	Zv9_00050228	lincRNA	chr22	25804285	25806767	+	2483	1444	LAST	4	chr22	25805512	25806767	1256	119	9.47452	8.241	49.6537	exonized	ANGEL	DNA/hAT	chr22	25805960	25806078	-	17.6
ID=chr22:+:gene:25804268:25806998;children=Zv9_00050228,Zv9_00050226,Zv9_00050227,Zv9_00050229;	Zv9_00050229	lincRNA	chr22	25804285	25806767	+	2483	1460	LAST	4	chr22	25805512	25806767	1256	84	6.6879	5.75342	49.1096	exonized	TE-X-4_DR	Unknown	chr22	25805739	25805822	-	17.1
ID=chr22:+:gene:25804268:25806998;children=Zv9_00050228,Zv9_00050226,Zv9_00050227,Zv9_00050229;	Zv9_00050229	lincRNA	chr22	25804285	25806767	+	2483	1460	LAST	4	chr22	25805512	25806767	1256	163	12.9777	11.1644	49.1096	exonized	EnSpm-N6_DR	DNA/En-Spm?	chr22	25806418	25806580	+	12.9
ID=chr22:+:gene:25804268:25806998;children=Zv9_00050228,Zv9_00050226,Zv9_00050227,Zv9_00050229;	Zv9_00050229	lincRNA	chr22	25804285	25806767	+	2483	1460	LAST	4	chr22	25805512	25806767	1256	278	22.1338	19.0411	49.1096	exonized	EnSpm-N6_DR	DNA/En-Spm?	chr22	25806286	25806563	-	12.9
ID=chr22:+:gene:25804268:25806998;children=Zv9_00050228,Zv9_00050226,Zv9_00050227,Zv9_00050229;	Zv9_00050229	lincRNA	chr22	25804285	25806767	+	2483	1460	LAST	4	chr22	25805512	25806767	1256	73	5.8121	5	49.1096	exonized	ERV1-N1-LTR_DR	LTR/ERV1	chr22	25806695	25806767	+	12.7
ID=chr22:+:gene:25804268:25806998;children=Zv9_00050228,Zv9_00050226,Zv9_00050227,Zv9_00050229;	Zv9_00050229	lincRNA	chr22	25804285	25806767	+	2483	1460	LAST	4	chr22	25805512	25806767	1256	119	9.47452	8.15068	49.1096	exonized	ANGEL	DNA/hAT	chr22	25805960	25806078	-	17.6
ID=chr22:+:gene:3123404:3125161;children=UL_341;	UL_341	lincRNA	chr22	3123404	3125161	+	1758	1758	SINGLE	1	chr22	3123404	3125161	1758	205	11.661	11.661	51.479	exonized	TDR12	DNA	chr22	3124205	3124409	+	10.6
ID=chr22:+:gene:3123404:3125161;children=UL_341;	UL_341	lincRNA	chr22	3123404	3125161	+	1758	1758	SINGLE	1	chr22	3123404	3125161	1758	97	5.51763	5.51763	51.479	exonized	Kolobok-N2A_DR	DNA/Kolobok	chr22	3124439	3124535	-	13.9
ID=chr22:+:gene:3123404:3125161;children=UL_341;	UL_341	lincRNA	chr22	3123404	3125161	+	1758	1758	SINGLE	1	chr22	3123404	3125161	1758	603	34.3003	34.3003	51.479	exonized	DNA-AT-2_DR	DNA	chr22	3124531	3125133	+	11.8
ID=chr22:+:gene:33021575:33023641;children=UL_353;	UL_353	lincRNA	chr22	33021575	33023641	+	2067	2067	SINGLE	1	chr22	33021575	33023641	2067	227	10.9821	10.9821	24.2864	exonized	TDR16	DNA	chr22	33021882	33022108	+	13.9
ID=chr22:+:gene:33021575:33023641;children=UL_353;	UL_353	lincRNA	chr22	33021575	33023641	+	2067	2067	SINGLE	1	chr22	33021575	33023641	2067	63	3.0479	3.0479	24.2864	exonized	DNA-8-24_DR	DNA/hAT?	chr22	33022976	33023038	-	17.2
ID=chr22:+:gene:33021575:33023641;children=UL_353;	UL_353	lincRNA	chr22	33021575	33023641	+	2067	2067	SINGLE	1	chr22	33021575	33023641	2067	212	10.2564	10.2564	24.2864	exonized	ANGEL	DNA/hAT	chr22	33022189	33022400	+	17.6
ID=chr22:+:gene:40940195:40957206;children=UL_357;	UL_357	lincRNA	chr22	40940195	40957206	+	17012	3954	FIRST	1	chr22	40940195	40940708	514	79	15.3696	1.99798	42.0587	TSS	TDR1	DNA/TcMar-Tc1	chr22	40939608	40940273	+	8.2
ID=chr22:+:gene:40940195:40957206;children=UL_357;	UL_357	lincRNA	chr22	40940195	40957206	+	17012	3954	LAST	3	chr22	40953915	40957206	3292	528	16.0389	13.3536	42.0587	exonized	TDR18	DNA/hAT-Charlie	chr22	40956001	40956528	-	10.6
ID=chr22:+:gene:40940195:40957206;children=UL_357;	UL_357	lincRNA	chr22	40940195	40957206	+	17012	3954	LAST	3	chr22	40953915	40957206	3292	169	5.13366	4.27415	42.0587	exonized	MuDR-N1_DR	DNA/MuDR	chr22	40956529	40956697	+	10.9
ID=chr22:+:gene:40940195:40957206;children=UL_357;	UL_357	lincRNA	chr22	40940195	40957206	+	17012	3954	LAST	3	chr22	40953915	40957206	3292	149	4.52612	3.76834	42.0587	exonized	MuDR-N1_DR	DNA/MuDR	chr22	40955501	40955649	+	10.9
ID=chr22:+:gene:40940195:40957206;children=UL_357;	UL_357	lincRNA	chr22	40940195	40957206	+	17012	3954	LAST	3	chr22	40953915	40957206	3292	152	4.61725	3.84421	42.0587	exonized	DNA-5-3_DR	DNA	chr22	40956698	40956849	-	13
ID=chr22:+:gene:40940195:40957206;children=UL_357;	UL_357	lincRNA	chr22	40940195	40957206	+	17012	3954	LAST	3	chr22	40953915	40957206	3292	586	17.8007	14.8204	42.0587	exonized	DIRS-1-LTR_DR	LTR/DIRS	chr22	40954828	40955413	-	15.4
ID=chr22:+:gene:4607652:4610370;children=Zv9_00049790;	Zv9_00049790	lincRNA	chr22	4607652	4610370	+	2719	1321	FIRST	1	chr22	4607652	4608726	1075	100	9.30233	7.57002	42.0136	TSS	ERV1-N3-LTR_DR	LTR	chr22	4606376	4607751	+	13.9
ID=chr22:+:gene:4607652:4610370;children=Zv9_00049790;	Zv9_00049790	lincRNA	chr22	4607652	4610370	+	2719	1321	FIRST	1	chr22	4607652	4608726	1075	455	42.3256	34.4436	42.0136	exonized	DNA-X-11_DR	DNA	chr22	4607760	4608214	-	13.3
ID=chr22:+:gene:6980207:7014460;children=Zv9_00049826,Zv9_00049827;	Zv9_00049826	lincRNA	chr22	6980207	7014459	+	34253	1020	MIDDLE	3	chr22	6983528	6983620	93	93	100	9.11765	15.7843	Both_SPL	TDR13	DNA	chr22	6983134	6983782	-	15.4
ID=chr22:+:gene:6980207:7014460;children=Zv9_00049826,Zv9_00049827;	Zv9_00049826	lincRNA	chr22	6980207	7014459	+	34253	1020	LAST	5	chr22	7013914	7014459	546	68	12.4542	6.66667	15.7843	PolyA	HATN12_DR	DNA/hAT	chr22	7014392	7014494	-	16.5
ID=chr22:+:gene:6980207:7014460;children=Zv9_00049826,Zv9_00049827;	Zv9_00049827	lincRNA	chr22	7004999	7014460	+	9462	685	LAST	2	chr22	7013914	7014460	547	69	12.6143	10.073	10.073	PolyA	HATN12_DR	DNA/hAT	chr22	7014392	7014494	-	16.5
ID=chr23:-:gene:1087667:1089116;children=Zv9_00052538;	Zv9_00052538	lincRNA	chr23	1087667	1089116	-	1450	862	FIRST	1	chr23	1088689	1089116	428	45	10.514	5.22042	5.22042	SPL	Kolobok-N4_DR	DNA/Kolobok	chr23	1088516	1088733	+	18.7
ID=chr23:-:gene:2434175:2435347;children=Zv9_00052560;	Zv9_00052560	lincRNA	chr23	2434175	2435347	-	1173	437	LAST	2	chr23	2434175	2434408	234	139	59.4017	31.8078	31.8078	PolyA	DNA-X-9_DR	DNA	chr23	2434150	2434313	-	19.5
ID=chr23:-:gene:24895797:24898993;children=Zv9_00052994;	Zv9_00052994	lincRNA	chr23	24895797	24898993	-	3197	770	LAST	2	chr23	24895797	24896313	517	67	12.9594	8.7013	8.7013	PolyA	DNA15TA1_DR	DNA/TcMar-Tc1	chr23	24895438	24895863	-	8.5
ID=chr23:-:gene:266906:269445;children=Zv9_00052508;	Zv9_00052508	lincRNA	chr23	266906	269445	-	2540	2481	FIRST	1	chr23	267989	269445	1457	242	16.6095	9.75413	35.0262	exonized	Kolobok-N1_DR	DNA/Kolobok?	chr23	268480	268721	-	15.1
ID=chr23:-:gene:266906:269445;children=Zv9_00052508;	Zv9_00052508	lincRNA	chr23	266906	269445	-	2540	2481	FIRST	1	chr23	267989	269445	1457	378	25.9437	15.2358	35.0262	exonized	Kolobok-N1_DR	DNA/Kolobok?	chr23	268104	268481	-	15.1
ID=chr23:-:gene:266906:269445;children=Zv9_00052508;	Zv9_00052508	lincRNA	chr23	266906	269445	-	2540	2481	FIRST	1	chr23	267989	269445	1457	249	17.0899	10.0363	35.0262	exonized	DNA-2-30_DR	DNA	chr23	269015	269263	+	14
ID=chr23:-:gene:26990510:27000197;children=Zv9_00053049;	Zv9_00053049	lincRNA	chr23	26990510	27000197	-	9688	856	LAST	2	chr23	26990510	26991198	689	79	11.4659	9.22897	31.8925	exonized	DNA-6-N8_DR	DNA	chr23	26990633	26990711	-	15.9
ID=chr23:-:gene:26990510:27000197;children=Zv9_00053049;	Zv9_00053049	lincRNA	chr23	26990510	27000197	-	9688	856	LAST	2	chr23	26990510	26991198	689	194	28.1567	22.6636	31.8925	PolyA	DNA-6-N8_DR	DNA	chr23	26989743	26990703	+	15.9
ID=chr23:-:gene:29576745:29601106;children=UL_377;	UL_377	lincRNA	chr23	29576745	29601106	-	24362	3644	LAST	11	chr23	29576745	29578853	2109	76	3.6036	2.08562	9.5225	exonized	SINE3-1a	SINE/5S	chr23	29578151	29578226	-	9.92
ID=chr23:-:gene:29576745:29601106;children=UL_377;	UL_377	lincRNA	chr23	29576745	29601106	-	24362	3644	LAST	11	chr23	29576745	29578853	2109	100	4.74158	2.74424	9.5225	exonized	HATN12_DR	DNA/hAT-Ac	chr23	29577438	29577537	+	16.5
ID=chr23:-:gene:29576745:29601106;children=UL_377;	UL_377	lincRNA	chr23	29576745	29601106	-	24362	3644	LAST	11	chr23	29576745	29578853	2109	59	2.79753	1.6191	9.5225	exonized	HATN12_DR	DNA/hAT-Ac	chr23	29577242	29577300	+	16.5
ID=chr23:-:gene:29576745:29601106;children=UL_377;	UL_377	lincRNA	chr23	29576745	29601106	-	24362	3644	LAST	11	chr23	29576745	29578853	2109	112	5.31057	3.07355	9.5225	exonized	HATN12_DR	DNA/hAT-Ac	chr23	29577008	29577119	+	16.5
ID=chr23:-:gene:31491879:31505200;children=UL_378;	UL_378	lincRNA	chr23	31491879	31505200	-	13322	2648	LAST	7	chr23	31491879	31493740	1862	200	10.7411	7.55287	43.8066	exonized	hAT-N66_DR	DNA/hAT-Charlie	chr23	31492154	31492353	+	10.4
ID=chr23:-:gene:31491879:31505200;children=UL_378;	UL_378	lincRNA	chr23	31491879	31505200	-	13322	2648	LAST	7	chr23	31491879	31493740	1862	960	51.5575	36.2538	43.8066	exonized	TC1DR3	DNA/TcMar-Tc1	chr23	31492365	31493324	+	10.4
ID=chr23:-:gene:35537532:35543081;children=UL_385,UL_386;	UL_385	lincRNA	chr23	35537532	35543025	-	5494	5494	SINGLE	1	chr23	35537532	35543025	5494	91	1.65635	1.65635	23.7532	exonized	DNA8-4A_DR	DNA/hAT-Charlie	chr23	35540979	35541069	-	11.6
ID=chr23:-:gene:35537532:35543081;children=UL_385,UL_386;	UL_385	lincRNA	chr23	35537532	35543025	-	5494	5494	SINGLE	1	chr23	35537532	35543025	5494	457	8.31817	8.31817	23.7532	exonized	DNA8-4A_DR	DNA/hAT-Charlie	chr23	35540522	35540978	-	11.6
ID=chr23:-:gene:35537532:35543081;children=UL_385,UL_386;	UL_385	lincRNA	chr23	35537532	35543025	-	5494	5494	SINGLE	1	chr23	35537532	35543025	5494	140	2.54823	2.54823	23.7532	exonized	DNA2-1_DR	DNA/TcMar?	chr23	35540382	35540521	-	15.7
ID=chr23:-:gene:35537532:35543081;children=UL_385,UL_386;	UL_385	lincRNA	chr23	35537532	35543025	-	5494	5494	SINGLE	1	chr23	35537532	35543025	5494	617	11.2304	11.2304	23.7532	exonized	DIRS-6_DR	LTR/Ngaro	chr23	35538862	35539478	-	14.9
ID=chr23:-:gene:35537532:35543081;children=UL_385,UL_386;	UL_386	lincRNA	chr23	35537532	35543081	-	5550	5550	SINGLE	1	chr23	35537532	35543081	5550	91	1.63964	1.63964	23.5135	exonized	DNA8-4A_DR	DNA/hAT-Charlie	chr23	35540979	35541069	-	11.6
ID=chr23:-:gene:35537532:35543081;children=UL_385,UL_386;	UL_386	lincRNA	chr23	35537532	35543081	-	5550	5550	SINGLE	1	chr23	35537532	35543081	5550	457	8.23423	8.23423	23.5135	exonized	DNA8-4A_DR	DNA/hAT-Charlie	chr23	35540522	35540978	-	11.6
ID=chr23:-:gene:35537532:35543081;children=UL_385,UL_386;	UL_386	lincRNA	chr23	35537532	35543081	-	5550	5550	SINGLE	1	chr23	35537532	35543081	5550	140	2.52252	2.52252	23.5135	exonized	DNA2-1_DR	DNA/TcMar?	chr23	35540382	35540521	-	15.7
ID=chr23:-:gene:35537532:35543081;children=UL_385,UL_386;	UL_386	lincRNA	chr23	35537532	35543081	-	5550	5550	SINGLE	1	chr23	35537532	35543081	5550	617	11.1171	11.1171	23.5135	exonized	DIRS-6_DR	LTR/Ngaro	chr23	35538862	35539478	-	14.9
ID=chr23:-:gene:36132977:36139778;children=Zv9_00053299;	Zv9_00053299	lincRNA	chr23	36132977	36139778	-	6802	3049	LAST	2	chr23	36132977	36135833	2857	65	2.27511	2.13185	2.13185	exonized	ENSPM-6_DR	DNA/En-Spm	chr23	36133415	36133479	+	17.5
ID=chr23:-:gene:40669348:40682094;children=UL_393;	UL_393	lincRNA	chr23	40669348	40682094	-	12747	671	MIDDLE	2	chr23	40678742	40678809	68	68	100	10.1341	10.1341	Both_SPL	HE1_DR1	SINE/V	chr23	40678700	40678829	-	13.2
ID=chr23:-:gene:5591785:5619953;children=UL_363;	UL_363	lincRNA	chr23	5591785	5619953	-	28169	1084	FIRST	1	chr23	5619486	5619953	468	24	5.12821	2.21402	2.21402	TSS	DNA-5-2_DR	DNA/hAT-Tip100	chr23	5619930	5620064	-	12.6
ID=chr23:+:gene:18049716:18052040;children=UL_368;	UL_368	lincRNA	chr23	18049716	18052040	+	2325	734	FIRST	1	chr23	18049716	18049855	140	38	27.1429	5.17711	5.17711	TSS	TDR8D	DNA	chr23	18049661	18049753	+	12.7
ID=chr23:+:gene:19394096:19407991;children=UL_370,UL_369;	UL_369	lincRNA	chr23	19394096	19407935	+	13840	2158	FIRST	1	chr23	19394096	19394750	655	541	82.5954	25.0695	25.0695	TSS	DNA-8-17_DR	DNA/hAT?	chr23	19393344	19394636	+	10.7
ID=chr23:+:gene:19394096:19407991;children=UL_370,UL_369;	UL_370	lincRNA	chr23	19394096	19407991	+	13896	2214	FIRST	1	chr23	19394096	19394750	655	541	82.5954	24.4354	24.4354	TSS	DNA-8-17_DR	DNA/hAT?	chr23	19393344	19394636	+	10.7
ID=chr23:+:gene:24770651:24772839;children=UL_375,UL_374,UL_373;	UL_373	lincRNA	chr23	24770651	24772006	+	1356	1356	SINGLE	1	chr23	24770651	24772006	1356	99	7.30088	7.30088	7.30088	exonized	DNA-2-29_DR	DNA	chr23	24771331	24771429	-	13.9
ID=chr23:+:gene:24770651:24772839;children=UL_375,UL_374,UL_373;	UL_374	lincRNA	chr23	24770651	24772114	+	1464	1464	SINGLE	1	chr23	24770651	24772114	1464	99	6.7623	6.7623	6.7623	exonized	DNA-2-29_DR	DNA	chr23	24771331	24771429	-	13.9
ID=chr23:+:gene:24770651:24772839;children=UL_375,UL_374,UL_373;	UL_375	lincRNA	chr23	24770651	24772839	+	2189	2189	SINGLE	1	chr23	24770651	24772839	2189	99	4.52261	4.52261	4.52261	exonized	DNA-2-29_DR	DNA	chr23	24771331	24771429	-	13.9
ID=chr23:+:gene:29187206:29199563;children=Zv9_00052099;	Zv9_00052099	lincRNA	chr23	29187206	29199563	+	12358	1700	LAST	3	chr23	29198518	29199563	1046	191	18.26	11.2353	11.2353	exonized	ANGEL	DNA/hAT	chr23	29198824	29199014	+	17.6
ID=chr23:+:gene:32432987:32440073;children=Zv9_00052160;	Zv9_00052160	lincRNA	chr23	32432987	32440073	+	7087	893	LAST	2	chr23	32439300	32440073	774	259	33.4625	29.0034	37.29	PolyA	TDR18	DNA/hAT-Charlie	chr23	32439815	32440263	-	10.6
ID=chr23:+:gene:32432987:32440073;children=Zv9_00052160;	Zv9_00052160	lincRNA	chr23	32432987	32440073	+	7087	893	LAST	2	chr23	32439300	32440073	774	36	4.65116	4.03135	37.29	exonized	Helitron-N3_DR	DNA/Helitron	chr23	32439853	32439888	+	14.5
ID=chr23:+:gene:32432987:32440073;children=Zv9_00052160;	Zv9_00052160	lincRNA	chr23	32432987	32440073	+	7087	893	LAST	2	chr23	32439300	32440073	774	14	1.80879	1.56775	37.29	exonized	Helitron-N3_DR	DNA/Helitron	chr23	32439777	32439790	+	14.5
ID=chr23:+:gene:32432987:32440073;children=Zv9_00052160;	Zv9_00052160	lincRNA	chr23	32432987	32440073	+	7087	893	LAST	2	chr23	32439300	32440073	774	24	3.10078	2.68757	37.29	exonized	ENSPM-6_DR	DNA/En-Spm	chr23	32439791	32439814	-	17.5
ID=chr23:+:gene:35477892:35517935;children=UL_383,UL_384;	UL_384	lincRNA	chr23	35477892	35517935	+	40044	6160	LAST	4	chr23	35512290	35517935	5646	221	3.91428	3.58766	26.8506	exonized	hAT-N51_DR	DNA/hAT-Ac	chr23	35515391	35515611	+	11.6
ID=chr23:+:gene:35477892:35517935;children=UL_383,UL_384;	UL_384	lincRNA	chr23	35477892	35517935	+	40044	6160	LAST	4	chr23	35512290	35517935	5646	63	1.11583	1.02273	26.8506	exonized	hAT-N51_DR	DNA/hAT-Ac	chr23	35512956	35513018	+	11.6
ID=chr23:+:gene:35477892:35517935;children=UL_383,UL_384;	UL_384	lincRNA	chr23	35477892	35517935	+	40044	6160	LAST	4	chr23	35512290	35517935	5646	104	1.84201	1.68831	26.8506	exonized	Helitron-1_DR	DNA/Helitron	chr23	35514110	35514213	+	17.5
ID=chr23:+:gene:35477892:35517935;children=UL_383,UL_384;	UL_384	lincRNA	chr23	35477892	35517935	+	40044	6160	LAST	4	chr23	35512290	35517935	5646	209	3.70174	3.39286	26.8506	exonized	HE1_DR1	SINE/V	chr23	35515790	35515998	-	13.2
ID=chr23:+:gene:35477892:35517935;children=UL_383,UL_384;	UL_384	lincRNA	chr23	35477892	35517935	+	40044	6160	LAST	4	chr23	35512290	35517935	5646	64	1.13355	1.03896	26.8506	exonized	DNA-5-6_DR	DNA/hAT	chr23	35514966	35515029	+	11
ID=chr23:+:gene:35477892:35517935;children=UL_383,UL_384;	UL_384	lincRNA	chr23	35477892	35517935	+	40044	6160	LAST	4	chr23	35512290	35517935	5646	608	10.7687	9.87013	26.8506	exonized	DNA-4-1_DR	DNA	chr23	35514121	35514728	-	14.4
ID=chr23:+:gene:35477892:35517935;children=UL_383,UL_384;	UL_384	lincRNA	chr23	35477892	35517935	+	40044	6160	LAST	4	chr23	35512290	35517935	5646	269	4.76443	4.36688	26.8506	exonized	DANA	SINE/V	chr23	35513078	35513346	+	9.7
ID=chr23:+:gene:35477892:35517935;children=UL_383,UL_384;	UL_384	lincRNA	chr23	35477892	35517935	+	40044	6160	LAST	4	chr23	35512290	35517935	5646	116	2.05455	1.88312	26.8506	exonized	ANGEL	DNA/hAT	chr23	35516080	35516195	+	17.6
ID=chr23:+:gene:36237585:36242104;children=UL_389,UL_391,UL_390;	UL_390	lincRNA	chr23	36237585	36242028	+	4444	4444	SINGLE	1	chr23	36237585	36242028	4444	525	11.8137	11.8137	11.8137	exonized	TDR25	DNA	chr23	36240779	36241303	-	14.7
ID=chr23:+:gene:36237585:36242104;children=UL_389,UL_391,UL_390;	UL_391	lincRNA	chr23	36237585	36242104	+	4520	4520	SINGLE	1	chr23	36237585	36242104	4520	525	11.615	11.615	11.615	exonized	TDR25	DNA	chr23	36240779	36241303	-	14.7
ID=chr23:+:gene:36469696:36471700;children=UL_392;	UL_392	lincRNA	chr23	36469696	36471700	+	2005	403	MIDDLE	2	chr23	36470983	36471126	144	144	100	35.732	44.665	Both_SPL	HE1_DR1	SINE/V	chr23	36470957	36471301	+	13.2
ID=chr23:+:gene:36469696:36471700;children=UL_392;	UL_392	lincRNA	chr23	36469696	36471700	+	2005	403	LAST	4	chr23	36471563	36471700	138	36	26.087	8.933	44.665	SPL	DNA-8-14_DR	DNA/hAT-Charlie	chr23	36471468	36471598	+	11.4
ID=chr23:+:gene:36987458:36991098;children=Zv9_00052272;	Zv9_00052272	lincRNA	chr23	36987458	36991098	+	3641	410	LAST	2	chr23	36990754	36991098	345	104	30.1449	25.3659	50.9756	PolyA	TDR18	DNA/hAT-Charlie	chr23	36990995	36991532	+	10.6
ID=chr23:+:gene:36987458:36991098;children=Zv9_00052272;	Zv9_00052272	lincRNA	chr23	36987458	36991098	+	3641	410	LAST	2	chr23	36990754	36991098	345	105	30.4348	25.6098	50.9756	exonized	EnSpm-N2_DR	DNA/En-Spm	chr23	36990981	36991085	-	14
ID=chr23:+:gene:37492888:37531194;children=Zv9_00052279;	Zv9_00052279	lincRNA	chr23	37492888	37531194	+	38307	1404	LAST	4	chr23	37530517	37531194	678	32	4.71976	2.2792	10.1852	PolyA	DNA2-5_DR	DNA	chr23	37531163	37531375	+	13.8
ID=chr23:+:gene:37492888:37531194;children=Zv9_00052279;	Zv9_00052279	lincRNA	chr23	37492888	37531194	+	38307	1404	LAST	4	chr23	37530517	37531194	678	111	16.3717	7.90598	10.1852	exonized	DNA11TA1_DR	DNA/TcMar-Tc1	chr23	37530886	37530996	-	14.2
ID=chr23:+:gene:42320639:42331527;children=Zv9_00052377;	Zv9_00052377	lincRNA	chr23	42320639	42331527	+	10889	649	LAST	2	chr23	42331171	42331527	357	104	29.1317	16.0247	16.0247	PolyA	DNAX-1_DR	DNA	chr23	42331424	42331547	-	16.9
ID=chr23:+:gene:4324991:4332182;children=UL_360;	UL_360	lincRNA	chr23	4324991	4332182	+	7192	1892	FIRST	1	chr23	4324991	4325629	639	90	14.0845	4.75687	4.75687	TSS	HE1_DR1	SINE/V	chr23	4324745	4325080	-	13.2
ID=chr23:+:gene:44633354:44638005;children=Zv9_00052425,Zv9_00052428,Zv9_00052427,Zv9_00052426;	Zv9_00052428	lincRNA	chr23	44633435	44638003	+	4569	4289	FIRST	1	chr23	44633435	44635817	2383	190	7.97314	4.42994	4.42994	exonized	hAT-N20_DR	DNA/hAT	chr23	44633453	44633642	+	11.7
ID=chr23:+:gene:44633354:44638005;children=Zv9_00052428,Zv9_00052425,Zv9_00052427,Zv9_00052426;	Zv9_00052425	lincRNA	chr23	44633354	44637961	+	4608	3707	FIRST	1	chr23	44633354	44635842	2489	190	7.63359	5.12544	5.12544	exonized	hAT-N20_DR	DNA/hAT	chr23	44633453	44633642	+	11.7
ID=chr23:+:gene:44633354:44638005;children=Zv9_00052428,Zv9_00052425,Zv9_00052427,Zv9_00052426;	Zv9_00052426	lincRNA	chr23	44633433	44637958	+	4526	4432	FIRST	1	chr23	44633433	44636710	3278	190	5.79622	4.287	4.287	exonized	hAT-N20_DR	DNA/hAT	chr23	44633453	44633642	+	11.7
ID=chr23:+:gene:44633354:44638005;children=Zv9_00052428,Zv9_00052425,Zv9_00052427,Zv9_00052426;	Zv9_00052427	lincRNA	chr23	44633433	44638005	+	4573	3517	FIRST	1	chr23	44633433	44635842	2410	190	7.88382	5.40233	5.40233	exonized	hAT-N20_DR	DNA/hAT	chr23	44633453	44633642	+	11.7
ID=chr23:+:gene:45173215:45218110;children=UL_394;	UL_394	lincRNA	chr23	45173215	45218110	+	44896	3912	MIDDLE	15	chr23	45191754	45191909	156	16	10.2564	0.408998	0.408998	SPL	DNA9TA1_DR	DNA/TcMar-Tc1	chr23	45191894	45191959	-	12.6
ID=chr23:+:gene:45543584:45550065;children=UL_396,UL_395;	UL_395	lincRNA	chr23	45543584	45549900	+	6317	1127	FIRST	1	chr23	45543584	45544116	533	75	14.0713	6.65484	6.65484	TSS	HATN1_DR	DNA/hAT	chr23	45543536	45543658	-	12.1
ID=chr23:+:gene:45543584:45550065;children=UL_396,UL_395;	UL_396	lincRNA	chr23	45543584	45550065	+	6482	1292	FIRST	1	chr23	45543584	45544116	533	75	14.0713	5.80495	5.80495	TSS	HATN1_DR	DNA/hAT	chr23	45543536	45543658	-	12.1
ID=chr23:+:gene:6685959:6712677;children=Zv9_00051614,Zv9_00051613;	Zv9_00051614	lincRNA	chr23	6685985	6712677	+	26693	1083	LAST	3	chr23	6711879	6712677	799	48	6.00751	4.43213	4.43213	PolyA	TDR2	DNA/TcMar-Tc1	chr23	6712630	6712815	-	8.1
ID=chr23:+:gene:7129938:7176551;children=Zv9_00051620;	Zv9_00051620	lincRNA	chr23	7129938	7176551	+	46614	1631	LAST	3	chr23	7175171	7176551	1381	268	19.4062	16.4316	16.4316	PolyA	DNA2-3_DR	DNA/hAT?	chr23	7176284	7177510	-	12
ID=chr24:-:gene:1046148:1121515;children=Zv9_00054464;	Zv9_00054464	lincRNA	chr24	1046148	1121515	-	75368	933	FIRST	1	chr24	1120852	1121515	664	102	15.3614	10.9325	50.5895	exonized	TDR19	DNA/hAT	chr24	1121077	1121178	-	19.4
ID=chr24:-:gene:1046148:1121515;children=Zv9_00054464;	Zv9_00054464	lincRNA	chr24	1046148	1121515	-	75368	933	FIRST	1	chr24	1120852	1121515	664	176	26.506	18.8639	50.5895	exonized	TDR19	DNA/hAT	chr24	1120931	1121106	+	19.4
ID=chr24:-:gene:1046148:1121515;children=Zv9_00054464;	Zv9_00054464	lincRNA	chr24	1046148	1121515	-	75368	933	FIRST	1	chr24	1120852	1121515	664	194	29.2169	20.7931	50.5895	TSS	HarbingerN7_DR	DNA/Harbinger	chr24	1121322	1121767	+	16.2
ID=chr24:-:gene:13920:18554;children=Zv9_00054442;	Zv9_00054442	lincRNA	chr24	13920	18554	-	4635	1580	FIRST	1	chr24	17434	18554	1121	125	11.1508	7.91139	7.91139	exonized	DNA-2-33_DR	DNA/TcMar-Tc1	chr24	17759	17883	-	12.6
ID=chr24:-:gene:17952578:17955588;children=UL_406;	UL_406	lincRNA	chr24	17952578	17955588	-	3011	1331	LAST	2	chr24	17952578	17953710	1133	356	31.421	26.7468	26.7468	exonized	Tc1-1_DR	DNA/TcMar-Tc1	chr24	17953231	17953586	-	13.1
ID=chr24:-:gene:18711:20906;children=Zv9_00054444,Zv9_00054443;	Zv9_00054443	lincRNA	chr24	18711	20906	-	2196	1241	FIRST	1	chr24	19756	20906	1151	263	22.8497	21.1926	46.8977	exonized	Gypsy62-LTR_DR	LTR/Gypsy	chr24	19969	20231	-	21.2
ID=chr24:-:gene:18711:20906;children=Zv9_00054444,Zv9_00054443;	Zv9_00054443	lincRNA	chr24	18711	20906	-	2196	1241	FIRST	1	chr24	19756	20906	1151	99	8.60122	7.97744	46.8977	exonized	DNA-1-6_DR	DNA	chr24	20410	20508	-	16.8
ID=chr24:-:gene:18711:20906;children=Zv9_00054444,Zv9_00054443;	Zv9_00054443	lincRNA	chr24	18711	20906	-	2196	1241	FIRST	1	chr24	19756	20906	1151	220	19.1138	17.7276	46.8977	exonized	ANGEL	DNA/hAT	chr24	20650	20869	+	17.6
ID=chr24:-:gene:18711:20906;children=Zv9_00054444,Zv9_00054443;	Zv9_00054444	lincRNA	chr24	18715	20206	-	1492	695	FIRST	1	chr24	19756	20206	451	238	52.7716	34.2446	34.2446	TSS	Gypsy62-LTR_DR	LTR/Gypsy	chr24	19969	20231	-	21.2
ID=chr24:-:gene:25024272:25110970;children=Zv9_00054881,Zv9_00054882,Zv9_00054883;	Zv9_00054881	lincRNA	chr24	25024272	25059751	-	35480	1575	LAST	3	chr24	25024272	25025446	1175	77	6.55319	4.88889	30.8571	exonized	TDR7	DNA	chr24	25024685	25024761	-	12.5
ID=chr24:-:gene:25024272:25110970;children=Zv9_00054881,Zv9_00054882,Zv9_00054883;	Zv9_00054881	lincRNA	chr24	25024272	25059751	-	35480	1575	LAST	3	chr24	25024272	25025446	1175	409	34.8085	25.9683	30.8571	PolyA	TC1DR3	DNA/TcMar-Tc1	chr24	25023795	25024680	+	10.4
ID=chr24:-:gene:32590238:32591624;children=UL_413;	UL_413	lincRNA	chr24	32590238	32591624	-	1387	1387	SINGLE	1	chr24	32590238	32591624	1387	537	38.7167	38.7167	38.7167	exonized	DNA-8-36_DR	DNA/hAT-Tip100	chr24	32590557	32591093	-	14.1
ID=chr24:-:gene:39588331:39595602;children=Zv9_00055192;	Zv9_00055192	lincRNA	chr24	39588331	39595602	-	7272	429	LAST	2	chr24	39588331	39588725	395	263	66.5823	61.3054	61.3054	exonized	Kolobok-N4_DR	DNA/Kolobok	chr24	39588386	39588648	+	18.7
ID=chr24:-:gene:40178524:40184779;children=UL_420;	UL_420	lincRNA	chr24	40178524	40184779	-	6256	3000	LAST	2	chr24	40178524	40180741	2218	197	8.88188	6.56667	10.4333	exonized	DNA-8-26_DR	DNA/hAT-Tip100?	chr24	40180241	40180437	+	19
ID=chr24:-:gene:40178524:40184779;children=UL_420;	UL_420	lincRNA	chr24	40178524	40184779	-	6256	3000	LAST	2	chr24	40178524	40180741	2218	116	5.22994	3.86667	10.4333	exonized	DNA-8-26_DR	DNA/hAT-Tip100?	chr24	40179956	40180071	+	19
ID=chr24:+:gene:10198836:10207523;children=UL_403;	UL_403	lincRNA	chr24	10198836	10207523	+	8688	1501	FIRST	1	chr24	10198836	10199015	180	39	21.6667	2.59827	70.2199	TSS	IS4EU-2_DR	DNA/Kolobok-IS4EU	chr24	10198565	10198874	+	20.5
ID=chr24:+:gene:10198836:10207523;children=UL_403;	UL_403	lincRNA	chr24	10198836	10207523	+	8688	1501	LAST	2	chr24	10206203	10207523	1321	869	65.7835	57.8947	70.2199	exonized	IS4EU-2_DR	DNA/Kolobok-IS4EU	chr24	10206308	10207176	+	20.5
ID=chr24:+:gene:10198836:10207523;children=UL_403;	UL_403	lincRNA	chr24	10198836	10207523	+	8688	1501	LAST	2	chr24	10206203	10207523	1321	71	5.37472	4.73018	70.2199	exonized	DNA-2-29_DR	DNA	chr24	10207241	10207311	+	13.9
ID=chr24:+:gene:10198836:10207523;children=UL_403;	UL_403	lincRNA	chr24	10198836	10207523	+	8688	1501	LAST	2	chr24	10206203	10207523	1321	75	5.67752	4.99667	70.2199	exonized	DIRS-1C-LTR_DR	LTR/Ngaro	chr24	10207177	10207251	+	12.8
ID=chr24:+:gene:10218060:10310485;children=Zv9_00053751;	Zv9_00053751	lincRNA	chr24	10218060	10310485	+	92426	959	LAST	3	chr24	10309880	10310485	606	171	28.2178	17.8311	63.7122	PolyA	SINE2-1_DR	SINE/tRNA	chr24	10310315	10310490	-	19.1
ID=chr24:+:gene:10218060:10310485;children=Zv9_00053751;	Zv9_00053751	lincRNA	chr24	10218060	10310485	+	92426	959	LAST	3	chr24	10309880	10310485	606	440	72.6073	45.8811	63.7122	SPL	DNA-X-7_DR	DNA	chr24	10309863	10310319	+	13.9
ID=chr24:+:gene:16053573:16068580;children=UL_405;	UL_405	lincRNA	chr24	16053573	16068580	+	15008	3653	LAST	5	chr24	16065646	16068580	2935	106	3.61158	2.90172	4.37996	exonized	ANGEL	DNA/hAT	chr24	16067756	16067861	+	17.6
ID=chr24:+:gene:16053573:16068580;children=UL_405;	UL_405	lincRNA	chr24	16053573	16068580	+	15008	3653	LAST	5	chr24	16065646	16068580	2935	54	1.83986	1.47824	4.37996	exonized	ANGEL	DNA/hAT	chr24	16066348	16066401	-	17.6
ID=chr24:+:gene:19426455:19428407;children=UL_407;	UL_407	lincRNA	chr24	19426455	19428407	+	1953	713	LAST	2	chr24	19427789	19428407	619	85	13.7318	11.9215	33.3801	exonized	LOOPERN4_DR	DNA/PiggyBac	chr24	19428116	19428200	-	15.4
ID=chr24:+:gene:19426455:19428407;children=UL_407;	UL_407	lincRNA	chr24	19426455	19428407	+	1953	713	LAST	2	chr24	19427789	19428407	619	66	10.6624	9.25666	33.3801	exonized	LOOPERN4B_DR	DNA/PiggyBac	chr24	19428048	19428113	+	12.4
ID=chr24:+:gene:19426455:19428407;children=UL_407;	UL_407	lincRNA	chr24	19426455	19428407	+	1953	713	LAST	2	chr24	19427789	19428407	619	87	14.0549	12.202	33.3801	exonized	Kolobok-1N2_DR	DNA/Kolobok	chr24	19428133	19428219	+	13.3
ID=chr24:+:gene:23332272:23345808;children=UL_410;	UL_410	lincRNA	chr24	23332272	23345808	+	13537	8142	FIRST	1	chr24	23332272	23339389	7118	126	1.77016	1.54753	45.7627	exonized	Tc1N1_DR	DNA/En-Spm?	chr24	23335317	23335442	+	13.9
ID=chr24:+:gene:23332272:23345808;children=UL_410;	UL_410	lincRNA	chr24	23332272	23345808	+	13537	8142	FIRST	1	chr24	23332272	23339389	7118	449	6.30795	5.51462	45.7627	exonized	TE-X-1_DR	DNA	chr24	23332277	23332725	+	11
ID=chr24:+:gene:23332272:23345808;children=UL_410;	UL_410	lincRNA	chr24	23332272	23345808	+	13537	8142	FIRST	1	chr24	23332272	23339389	7118	417	5.85839	5.12159	45.7627	exonized	TDR7	DNA	chr24	23338245	23338661	+	12.5
ID=chr24:+:gene:23332272:23345808;children=UL_410;	UL_410	lincRNA	chr24	23332272	23345808	+	13537	8142	FIRST	1	chr24	23332272	23339389	7118	150	2.10733	1.8423	45.7627	exonized	TDR25	DNA	chr24	23334973	23335122	-	14.7
ID=chr24:+:gene:23332272:23345808;children=UL_410;	UL_410	lincRNA	chr24	23332272	23345808	+	13537	8142	FIRST	1	chr24	23332272	23339389	7118	246	3.45603	3.02137	45.7627	exonized	TDR25	DNA	chr24	23334720	23334965	-	14.7
ID=chr24:+:gene:23332272:23345808;children=UL_410;	UL_410	lincRNA	chr24	23332272	23345808	+	13537	8142	FIRST	1	chr24	23332272	23339389	7118	429	6.02697	5.26898	45.7627	exonized	TDR18	DNA/hAT-Charlie	chr24	23336412	23336840	+	10.6
ID=chr24:+:gene:23332272:23345808;children=UL_410;	UL_410	lincRNA	chr24	23332272	23345808	+	13537	8142	FIRST	1	chr24	23332272	23339389	7118	447	6.27985	5.49005	45.7627	exonized	TDR18	DNA/hAT-Charlie	chr24	23335512	23335958	-	10.6
ID=chr24:+:gene:23332272:23345808;children=UL_410;	UL_410	lincRNA	chr24	23332272	23345808	+	13537	8142	FIRST	1	chr24	23332272	23339389	7118	447	6.27985	5.49005	45.7627	exonized	TDR18	DNA/hAT-Charlie	chr24	23333635	23334081	+	10.6
ID=chr24:+:gene:23332272:23345808;children=UL_410;	UL_410	lincRNA	chr24	23332272	23345808	+	13537	8142	FIRST	1	chr24	23332272	23339389	7118	250	3.51222	3.0705	45.7627	exonized	Mariner-N7_DR	DNA/TcMar	chr24	23333044	23333293	-	13.8
ID=chr24:+:gene:23332272:23345808;children=UL_410;	UL_410	lincRNA	chr24	23332272	23345808	+	13537	8142	FIRST	1	chr24	23332272	23339389	7118	81	1.13796	0.994842	45.7627	exonized	LOOPERN4B_DR	DNA/PiggyBac	chr24	23335208	23335288	-	12.4
ID=chr24:+:gene:23332272:23345808;children=UL_410;	UL_410	lincRNA	chr24	23332272	23345808	+	13537	8142	FIRST	1	chr24	23332272	23339389	7118	11	0.154538	0.135102	45.7627	exonized	Helitron-N3_DR	DNA/Helitron	chr24	23335501	23335511	+	14.5
ID=chr24:+:gene:23332272:23345808;children=UL_410;	UL_410	lincRNA	chr24	23332272	23345808	+	13537	8142	FIRST	1	chr24	23332272	23339389	7118	112	1.57348	1.37558	45.7627	exonized	DNA-X-4_DR	DNA	chr24	23333462	23333573	-	11.4
ID=chr24:+:gene:23332272:23345808;children=UL_410;	UL_410	lincRNA	chr24	23332272	23345808	+	13537	8142	FIRST	1	chr24	23332272	23339389	7118	275	3.86344	3.37755	45.7627	exonized	DNA-X-4_DR	DNA	chr24	23333294	23333568	+	11.4
ID=chr24:+:gene:23332272:23345808;children=UL_410;	UL_410	lincRNA	chr24	23332272	23345808	+	13537	8142	FIRST	1	chr24	23332272	23339389	7118	286	4.01798	3.51265	45.7627	exonized	DNA-X-4_DR	DNA	chr24	23332758	23333043	+	11.4
ID=chr24:+:gene:24581732:24585437;children=Zv9_00053986;	Zv9_00053986	lincRNA	chr24	24581732	24585437	+	3706	303	MIDDLE	2	chr24	24582653	24582805	153	153	100	50.495	50.495	Both_SPL	HE1_DR1	SINE/V	chr24	24582652	24583008	+	13.2
ID=chr24:+:gene:25752123:25792494;children=Zv9_00054009,Zv9_00054010;	Zv9_00054009	lincRNA	chr24	25752123	25792494	+	40372	2005	MIDDLE	3	chr24	25759667	25759699	33	33	100	1.64589	1.64589	Both_SPL	ANGEL	DNA/hAT	chr24	25759592	25759737	-	17.6
ID=chr24:+:gene:25752123:25792494;children=Zv9_00054009,Zv9_00054010;	Zv9_00054010	lincRNA	chr24	25752159	25767653	+	15495	1607	MIDDLE	3	chr24	25759667	25759699	33	33	100	2.05352	2.05352	Both_SPL	ANGEL	DNA/hAT	chr24	25759592	25759737	-	17.6
ID=chr24:+:gene:32893396:32903660;children=UL_414;	UL_414	lincRNA	chr24	32893396	32903660	+	10265	1041	MIDDLE	2	chr24	32899272	32899353	82	51	62.1951	4.89914	4.89914	exonized	TDR23	DNA	chr24	32899291	32899341	+	14
ID=chr24:+:gene:33792537:33798253;children=Zv9_00054181;	Zv9_00054181	lincRNA	chr24	33792537	33798253	+	5717	353	FIRST	1	chr24	33792537	33792811	275	23	8.36364	6.51558	6.51558	TSS	TDR19	DNA/hAT	chr24	33792329	33792559	+	19.4
ID=chr24:+:gene:37242633:37245527;children=Zv9_00054221;	Zv9_00054221	lincRNA	chr24	37242633	37245527	+	2895	354	FIRST	1	chr24	37242633	37242886	254	31	12.2047	8.75706	8.75706	TSS	TE-X-4_DR	Unknown	chr24	37242582	37242663	-	17.1
ID=chr24:+:gene:40848450:40849753;children=Zv9_00054343;	Zv9_00054343	lincRNA	chr24	40848450	40849753	+	1304	813	FIRST	1	chr24	40848450	40848577	128	72	56.25	8.85609	8.85609	TSS	TDR3	DNA/hAT-Charlie	chr24	40848308	40848521	+	16.3
ID=chr24:+:gene:43895000:43895911;children=Zv9_00054435;	Zv9_00054435	lincRNA	chr24	43895000	43895911	+	912	792	FIRST	1	chr24	43895000	43895776	777	88	11.3256	11.1111	11.1111	exonized	Polinton-1_DR	DNA/Maverick	chr24	43895174	43895261	-	20.5
ID=chr24:+:gene:608931:635375;children=Zv9_00053593;	Zv9_00053593	lincRNA	chr24	608931	635375	+	26445	518	LAST	3	chr24	635336	635375	40	40	100	7.72201	7.72201	PolyA_SPL	DIRS-1-LTR_DR	LTR/DIRS	chr24	635270	635509	-	15.4
ID=chr25:-:gene:17295842:17318993;children=Zv9_00056778,Zv9_00056779;	Zv9_00056779	lincRNA	chr25	17301452	17318993	-	17542	1644	LAST	3	chr25	17301452	17302731	1280	131	10.2344	7.96837	7.96837	PolyA	TDR7	DNA	chr25	17301284	17301582	-	12.5
ID=chr25:-:gene:2611710:2625201;children=Zv9_00056453,Zv9_00056452;	Zv9_00056452	lincRNA	chr25	2611710	2625201	-	13492	501	FIRST	1	chr25	2624979	2625201	223	115	51.5695	22.9541	22.9541	TSS	DNA8-5_DR	DNA/hAT-Ac	chr25	2625087	2625215	+	13.1
ID=chr25:-:gene:2611710:2625201;children=Zv9_00056453,Zv9_00056452;	Zv9_00056453	lincRNA	chr25	2624576	2625157	-	582	497	FIRST	1	chr25	2624979	2625157	179	71	39.6648	14.2857	24.1449	TSS	DNA8-5_DR	DNA/hAT-Ac	chr25	2625087	2625215	+	13.1
ID=chr25:-:gene:2611710:2625201;children=Zv9_00056453,Zv9_00056452;	Zv9_00056453	lincRNA	chr25	2624576	2625157	-	582	497	LAST	2	chr25	2624576	2624893	318	49	15.4088	9.85915	24.1449	PolyA	TDR2	DNA/TcMar-Tc1	chr25	2623703	2624624	+	8.1
ID=chr25:-:gene:33497040:33509509;children=Zv9_00057080,Zv9_00057081,Zv9_00057082,UL_431;	UL_431	lincRNA	chr25	33501314	33503546	-	2233	2233	SINGLE	1	chr25	33501314	33503546	2233	73	3.26914	3.26914	37.2593	exonized	hAT-N46_DR	DNA/hAT-Tip100	chr25	33501352	33501424	+	10
ID=chr25:-:gene:33497040:33509509;children=Zv9_00057080,Zv9_00057081,Zv9_00057082,UL_431;	UL_431	lincRNA	chr25	33501314	33503546	-	2233	2233	SINGLE	1	chr25	33501314	33503546	2233	226	10.1209	10.1209	37.2593	exonized	hAT-N22_DR	DNA/hAT	chr25	33501740	33501965	+	14.3
ID=chr25:-:gene:33497040:33509509;children=Zv9_00057080,Zv9_00057081,Zv9_00057082,UL_431;	UL_431	lincRNA	chr25	33501314	33503546	-	2233	2233	SINGLE	1	chr25	33501314	33503546	2233	304	13.614	13.614	37.2593	exonized	EnSpm-N7_DR	DNA/En-Spm	chr25	33501966	33502269	+	13.1
ID=chr25:-:gene:33497040:33509509;children=Zv9_00057080,Zv9_00057081,Zv9_00057082,UL_431;	UL_431	lincRNA	chr25	33501314	33503546	-	2233	2233	SINGLE	1	chr25	33501314	33503546	2233	154	6.89655	6.89655	37.2593	exonized	DNA-8-28_DR	DNA/P?	chr25	33503151	33503304	+	16.2
ID=chr25:-:gene:33497040:33509509;children=Zv9_00057080,Zv9_00057081,Zv9_00057082,UL_431;	UL_431	lincRNA	chr25	33501314	33503546	-	2233	2233	SINGLE	1	chr25	33501314	33503546	2233	75	3.35871	3.35871	37.2593	exonized	DNA-8-28_DR	DNA/P?	chr25	33501524	33501598	+	16.2
ID=chr25:-:gene:33497040:33509509;children=Zv9_00057081,Zv9_00057082,Zv9_00057080,UL_431;	Zv9_00057082	lincRNA	chr25	33499620	33509370	-	9751	628	LAST	3	chr25	33499620	33499884	265	63	23.7736	10.0318	42.1975	SPL	Kolobok-N7_DR	DNA/Kolobok	chr25	33499822	33500000	-	13.1
ID=chr25:-:gene:33497040:33509509;children=Zv9_00057081,Zv9_00057082,Zv9_00057080,UL_431;	Zv9_00057082	lincRNA	chr25	33499620	33509370	-	9751	628	LAST	3	chr25	33499620	33499884	265	202	76.2264	32.1656	42.1975	PolyA	Chaplin1B_DR	DNA/hAT-Charlie	chr25	33498921	33499821	-	4.1
ID=chr25:-:gene:344421:345653;children=Zv9_00056404;	Zv9_00056404	lincRNA	chr25	344421	345653	-	1233	1132	LAST	2	chr25	344421	345415	995	41	4.1206	3.62191	60.5124	exonized	hAT-N80_DR	DNA/hAT?	chr25	345327	345367	+	16.2
ID=chr25:-:gene:344421:345653;children=Zv9_00056404;	Zv9_00056404	lincRNA	chr25	344421	345653	-	1233	1132	LAST	2	chr25	344421	345415	995	70	7.03518	6.18375	60.5124	exonized	hAT-N80_DR	DNA/hAT?	chr25	344606	344675	+	16.2
ID=chr25:-:gene:344421:345653;children=Zv9_00056404;	Zv9_00056404	lincRNA	chr25	344421	345653	-	1233	1132	LAST	2	chr25	344421	345415	995	574	57.6884	50.7067	60.5124	exonized	hAT-N50_DR	DNA/hAT-Ac	chr25	344758	345331	+	13.2
ID=chr25:-:gene:3937138:3940712;children=Zv9_00056525;	Zv9_00056525	lincRNA	chr25	3937138	3940712	-	3575	1972	LAST	2	chr25	3937138	3938610	1473	49	3.32654	2.48479	4.91886	exonized	DNA-2-12_DR	DNA/En-Spm?	chr25	3937529	3937577	+	16.6
ID=chr25:-:gene:3937138:3940712;children=Zv9_00056525;	Zv9_00056525	lincRNA	chr25	3937138	3940712	-	3575	1972	LAST	2	chr25	3937138	3938610	1473	48	3.25866	2.43408	4.91886	exonized	ANGEL	DNA/hAT	chr25	3937523	3937570	-	17.6
ID=chr25:+:gene:2248983:2273213;children=Zv9_00055435,Zv9_00055436,Zv9_00055434;	Zv9_00055434	lincRNA	chr25	2248983	2273169	+	24187	732	LAST	4	chr25	2272932	2273169	238	15	6.30252	2.04918	2.04918	PolyA	ENSPM-6_DR	DNA/En-Spm	chr25	2273155	2273204	-	17.5
ID=chr25:+:gene:2248983:2273213;children=Zv9_00055435,Zv9_00055436,Zv9_00055434;	Zv9_00055436	lincRNA	chr25	2249144	2273213	+	24070	874	LAST	5	chr25	2272932	2273213	282	50	17.7305	5.72082	5.72082	exonized	ENSPM-6_DR	DNA/En-Spm	chr25	2273155	2273204	-	17.5
ID=chr25:+:gene:2479073:2487598;children=Zv9_00055439;	Zv9_00055439	lincRNA	chr25	2479073	2487598	+	8526	1085	LAST	3	chr25	2486694	2487598	905	68	7.51381	6.26728	13.8249	PolyA	TC1DR3	DNA/TcMar-Tc1	chr25	2487531	2488445	+	10.4
ID=chr25:+:gene:2479073:2487598;children=Zv9_00055439;	Zv9_00055439	lincRNA	chr25	2479073	2487598	+	8526	1085	LAST	3	chr25	2486694	2487598	905	82	9.06077	7.5576	13.8249	exonized	Helitron-N3_DR	DNA/Helitron	chr25	2487069	2487150	+	14.5
ID=chr25:+:gene:2666442:2670984;children=UL_421;	UL_421	lincRNA	chr25	2666442	2670984	+	4543	557	MIDDLE	3	chr25	2670582	2670629	48	48	100	8.61759	8.61759	Both_SPL	ANGEL	DNA/hAT	chr25	2670540	2670678	+	17.6
ID=chr25:+:gene:31331832:31334558;children=Zv9_00056161;	Zv9_00056161	lincRNA	chr25	31331832	31334558	+	2727	2636	FIRST	1	chr25	31331832	31333130	1299	623	47.96	23.6343	38.9985	exonized	DNA14-5-1_DR	DNA	chr25	31332016	31332638	-	10.2
ID=chr25:+:gene:31331832:31334558;children=Zv9_00056161;	Zv9_00056161	lincRNA	chr25	31331832	31334558	+	2727	2636	LAST	2	chr25	31333222	31334558	1337	85	6.35752	3.22458	38.9985	exonized	TDR19	DNA/hAT	chr25	31333934	31334018	-	19.4
ID=chr25:+:gene:31331832:31334558;children=Zv9_00056161;	Zv9_00056161	lincRNA	chr25	31331832	31334558	+	2727	2636	LAST	2	chr25	31333222	31334558	1337	53	3.9641	2.01062	38.9985	PolyA	DNA14-5-1_DR	DNA	chr25	31334506	31334619	+	10.2
ID=chr25:+:gene:31331832:31334558;children=Zv9_00056161;	Zv9_00056161	lincRNA	chr25	31331832	31334558	+	2727	2636	LAST	2	chr25	31333222	31334558	1337	170	12.715	6.44917	38.9985	exonized	DNA-TA-4_DR	DNA/TcMar	chr25	31334145	31334314	-	15.9
ID=chr25:+:gene:31331832:31334558;children=Zv9_00056161;	Zv9_00056161	lincRNA	chr25	31331832	31334558	+	2727	2636	LAST	2	chr25	31333222	31334558	1337	97	7.25505	3.67982	38.9985	exonized	DNA-TA-4_DR	DNA/TcMar	chr25	31334050	31334146	-	15.9
ID=chr25:+:gene:31350241:31352629;children=UL_430;	UL_430	lincRNA	chr25	31350241	31352629	+	2389	2389	SINGLE	1	chr25	31350241	31352629	2389	211	8.83215	8.83215	19.6735	exonized	DNA-6-N5_DR	DNA	chr25	31350729	31350939	+	17.4
ID=chr25:+:gene:31350241:31352629;children=UL_430;	UL_430	lincRNA	chr25	31350241	31352629	+	2389	2389	SINGLE	1	chr25	31350241	31352629	2389	259	10.8414	10.8414	19.6735	TSS	DIRS-1-LTR_DR	LTR/DIRS	chr25	31350135	31350499	+	15.4
ID=chr25:+:gene:3525581:3545841;children=Zv9_00055494,Zv9_00055493;	Zv9_00055494	lincRNA	chr25	3525728	3545841	+	20114	736	LAST	3	chr25	3545363	3545841	479	52	10.8559	7.06522	7.06522	exonized	ANGEL	DNA/hAT	chr25	3545602	3545653	-	17.6
ID=chr3:-:gene:13304959:13320819;children=UL_439;	UL_439	lincRNA	chr3	13304959	13320819	-	15861	5441	LAST	2	chr3	13304959	13309844	4886	118	2.41506	2.16872	44.4036	exonized	TDR20	DNA	chr3	13306483	13306600	-	8.5
ID=chr3:-:gene:13304959:13320819;children=UL_439;	UL_439	lincRNA	chr3	13304959	13320819	-	15861	5441	LAST	2	chr3	13304959	13309844	4886	59	1.20753	1.08436	44.4036	exonized	TDR20	DNA	chr3	13306411	13306469	-	8.5
ID=chr3:-:gene:13304959:13320819;children=UL_439;	UL_439	lincRNA	chr3	13304959	13320819	-	15861	5441	LAST	2	chr3	13304959	13309844	4886	42	0.859599	0.771917	44.4036	exonized	TDR19	DNA/hAT	chr3	13309580	13309621	+	19.4
ID=chr3:-:gene:13304959:13320819;children=UL_439;	UL_439	lincRNA	chr3	13304959	13320819	-	15861	5441	LAST	2	chr3	13304959	13309844	4886	231	4.72779	4.24554	44.4036	SPL	TDR13	DNA	chr3	13309614	13310269	+	15.4
ID=chr3:-:gene:13304959:13320819;children=UL_439;	UL_439	lincRNA	chr3	13304959	13320819	-	15861	5441	LAST	2	chr3	13304959	13309844	4886	225	4.60499	4.13527	44.4036	exonized	TC1DR2	DNA/TcMar-Tc1	chr3	13305112	13305336	-	11.8
ID=chr3:-:gene:13304959:13320819;children=UL_439;	UL_439	lincRNA	chr3	13304959	13320819	-	15861	5441	LAST	2	chr3	13304959	13309844	4886	208	4.25706	3.82283	44.4036	exonized	Kolobok-N3_DR	DNA/Kolobok?	chr3	13308397	13308604	-	15.6
ID=chr3:-:gene:13304959:13320819;children=UL_439;	UL_439	lincRNA	chr3	13304959	13320819	-	15861	5441	LAST	2	chr3	13304959	13309844	4886	76	1.55546	1.3968	44.4036	exonized	HarbingerN6_DR	DNA/Harbinger	chr3	13306211	13306286	+	14.9
ID=chr3:-:gene:13304959:13320819;children=UL_439;	UL_439	lincRNA	chr3	13304959	13320819	-	15861	5441	LAST	2	chr3	13304959	13309844	4886	155	3.17233	2.84874	44.4036	exonized	HE1_DR1	SINE/V	chr3	13308243	13308397	-	13.2
ID=chr3:-:gene:13304959:13320819;children=UL_439;	UL_439	lincRNA	chr3	13304959	13320819	-	15861	5441	LAST	2	chr3	13304959	13309844	4886	99	2.0262	1.81952	44.4036	exonized	DNA-8-14_DR	DNA/hAT-Charlie	chr3	13308230	13308328	+	11.4
ID=chr3:-:gene:13304959:13320819;children=UL_439;	UL_439	lincRNA	chr3	13304959	13320819	-	15861	5441	LAST	2	chr3	13304959	13309844	4886	694	14.2038	12.755	44.4036	exonized	DNA-1-5_DR	DNA	chr3	13308890	13309583	-	12
ID=chr3:-:gene:13304959:13320819;children=UL_439;	UL_439	lincRNA	chr3	13304959	13320819	-	15861	5441	LAST	2	chr3	13304959	13309844	4886	160	3.27466	2.94064	44.4036	exonized	DIRS-1-LTR_DR	LTR/DIRS	chr3	13305943	13306102	-	15.4
ID=chr3:-:gene:13304959:13320819;children=UL_439;	UL_439	lincRNA	chr3	13304959	13320819	-	15861	5441	LAST	2	chr3	13304959	13309844	4886	349	7.14286	6.41426	44.4036	exonized	DIRS-1-LTR_DR	LTR/DIRS	chr3	13305573	13305921	-	15.4
ID=chr3:-:gene:15231863:15240102;children=UL_442;	UL_442	lincRNA	chr3	15231863	15240102	-	8240	3513	LAST	3	chr3	15231863	15234175	2313	803	34.7168	22.858	35.7814	exonized	piggyBac-N1_DR	DNA/PiggyBac	chr3	15232517	15233319	+	10.1
ID=chr3:-:gene:15231863:15240102;children=UL_442;	UL_442	lincRNA	chr3	15231863	15240102	-	8240	3513	LAST	3	chr3	15231863	15234175	2313	192	8.30091	5.46541	35.7814	exonized	HATN7_DR	DNA/hAT	chr3	15233311	15233502	+	12.7
ID=chr3:-:gene:15231863:15240102;children=UL_442;	UL_442	lincRNA	chr3	15231863	15240102	-	8240	3513	LAST	3	chr3	15231863	15234175	2313	47	2.03199	1.33789	35.7814	exonized	HATN7_DR	DNA/hAT	chr3	15232340	15232386	+	12.7
ID=chr3:-:gene:15231863:15240102;children=UL_442;	UL_442	lincRNA	chr3	15231863	15240102	-	8240	3513	LAST	3	chr3	15231863	15234175	2313	98	4.23692	2.78964	35.7814	exonized	DNA2-2B_DR	DNA	chr3	15233662	15233759	+	13
ID=chr3:-:gene:15231863:15240102;children=UL_442;	UL_442	lincRNA	chr3	15231863	15240102	-	8240	3513	LAST	3	chr3	15231863	15234175	2313	76	3.28578	2.16339	35.7814	exonized	DNA2-2B_DR	DNA	chr3	15232066	15232141	+	13
ID=chr3:-:gene:15231863:15240102;children=UL_442;	UL_442	lincRNA	chr3	15231863	15240102	-	8240	3513	LAST	3	chr3	15231863	15234175	2313	41	1.77259	1.16709	35.7814	exonized	DNA-8-21_DR	DNA/hAT-Ac	chr3	15232293	15232333	+	11.7
ID=chr3:-:gene:19700483:19702044;children=Zv9_00007165;	Zv9_00007165	lincRNA	chr3	19700483	19702044	-	1562	329	FIRST	1	chr3	19701980	19702044	65	65	100	19.7568	37.0821	TSS_SPL	Kolobok-N7_DR	DNA/Kolobok	chr3	19701241	19702392	-	13.1
ID=chr3:-:gene:19700483:19702044;children=Zv9_00007165;	Zv9_00007165	lincRNA	chr3	19700483	19702044	-	1562	329	MIDDLE	2	chr3	19701273	19701329	57	57	100	17.3252	37.0821	Both_SPL	Kolobok-N7_DR	DNA/Kolobok	chr3	19701241	19702392	-	13.1
ID=chr3:-:gene:31211695:31219792;children=UL_456;	UL_456	lincRNA	chr3	31211695	31219792	-	8098	8098	SINGLE	1	chr3	31211695	31219792	8098	455	5.61867	5.61867	54.7543	exonized	Kolobok-N6_DR	DNA/Kolobok?	chr3	31215154	31215608	+	11.9
ID=chr3:-:gene:31211695:31219792;children=UL_456;	UL_456	lincRNA	chr3	31211695	31219792	-	8098	8098	SINGLE	1	chr3	31211695	31219792	8098	121	1.4942	1.4942	54.7543	exonized	Kolobok-N2_DR	DNA/Kolobok	chr3	31216608	31216728	-	14.7
ID=chr3:-:gene:31211695:31219792;children=UL_456;	UL_456	lincRNA	chr3	31211695	31219792	-	8098	8098	SINGLE	1	chr3	31211695	31219792	8098	710	8.7676	8.7676	54.7543	exonized	Kolobok-N2A_DR	DNA/Kolobok	chr3	31215897	31216606	+	13.9
ID=chr3:-:gene:31211695:31219792;children=UL_456;	UL_456	lincRNA	chr3	31211695	31219792	-	8098	8098	SINGLE	1	chr3	31211695	31219792	8098	761	9.39738	9.39738	54.7543	exonized	HarbingerN3_DR	DNA/Harbinger	chr3	31211878	31212638	+	10.2
ID=chr3:-:gene:31211695:31219792;children=UL_456;	UL_456	lincRNA	chr3	31211695	31219792	-	8098	8098	SINGLE	1	chr3	31211695	31219792	8098	1134	14.0035	14.0035	54.7543	exonized	Harbinger3N_DR	DNA/Harbinger	chr3	31212936	31214069	+	6.9
ID=chr3:-:gene:31211695:31219792;children=UL_456;	UL_456	lincRNA	chr3	31211695	31219792	-	8098	8098	SINGLE	1	chr3	31211695	31219792	8098	93	1.14843	1.14843	54.7543	exonized	DNA2-1_DR	DNA/TcMar?	chr3	31214072	31214164	C	15.7
ID=chr3:-:gene:31211695:31219792;children=UL_456;	UL_456	lincRNA	chr3	31211695	31219792	-	8098	8098	SINGLE	1	chr3	31211695	31219792	8098	273	3.3712	3.3712	54.7543	exonized	DNA2-1_DR	DNA/TcMar?	chr3	31212652	31212924	C	15.7
ID=chr3:-:gene:31211695:31219792;children=UL_456;	UL_456	lincRNA	chr3	31211695	31219792	-	8098	8098	SINGLE	1	chr3	31211695	31219792	8098	730	9.01457	9.01457	54.7543	exonized	DNA-6-N8_DR	DNA	chr3	31218192	31218921	+	15.9
ID=chr3:-:gene:31211695:31219792;children=UL_456;	UL_456	lincRNA	chr3	31211695	31219792	-	8098	8098	SINGLE	1	chr3	31211695	31219792	8098	157	1.93875	1.93875	54.7543	exonized	DNA-6-N8_DR	DNA	chr3	31218156	31218312	-	15.9
ID=chr3:-:gene:32992137:32996323;children=UL_465,UL_464;	UL_465	lincRNA	chr3	32992137	32996323	-	4187	4187	SINGLE	1	chr3	32992137	32996323	4187	195	4.65727	4.65727	27.2032	exonized	EnSpm-N1_DR	DNA/En-Spm	chr3	32994843	32995037	-	19.7
ID=chr3:-:gene:32992137:32996323;children=UL_465,UL_464;	UL_465	lincRNA	chr3	32992137	32996323	-	4187	4187	SINGLE	1	chr3	32992137	32996323	4187	319	7.61882	7.61882	27.2032	exonized	DNA15TA1_DR	DNA/TcMar-Tc1	chr3	32993795	32994113	-	8.5
ID=chr3:-:gene:32992137:32996323;children=UL_465,UL_464;	UL_465	lincRNA	chr3	32992137	32996323	-	4187	4187	SINGLE	1	chr3	32992137	32996323	4187	150	3.58252	3.58252	27.2032	exonized	DNA11TA1_DR	DNA/TcMar-Tc1	chr3	32993560	32993709	+	14.2
ID=chr3:-:gene:32992137:32996323;children=UL_465,UL_464;	UL_465	lincRNA	chr3	32992137	32996323	-	4187	4187	SINGLE	1	chr3	32992137	32996323	4187	119	2.84213	2.84213	27.2032	exonized	CR1-5_DR	LINE/L2	chr3	32994686	32994804	+	12.2
[truncated: 1,338 more rows]

## Sheet: Columns
COLUMN EXPLANATIONs
[truncated: 27 more rows]
